# Supplementary material for: Multi-omic profiling of histone variant H3.3 lysine 27 methylation reveals a distinct role from canonical H3 in stem cell differentiation
Source: Royal Society of Chemistry journal article supplement (doi:10.1039/d1mo00352f), 2022-01-12
Supplement: d1mo00352f1.pdf [file d1mo00352f1.pdf]

Please use files  
tab to view ESI  
tables.
