# Supplementary material for: Multi-omic profiling of histone variant H3.3 lysine 27 methylation reveals a distinct role from canonical H3 in stem cell differentiation
Source: Royal Society of Chemistry journal article supplement (doi:10.1039/d1mo00352f), 2022-01-12
Supplement: d1mo00352f3.xlsx [file d1mo00352f3.xlsx]

## Sheet: pluripotency
Peptide	unlabeled control B1	unlabeled control B2	unlabeled control B3	day 0.5 B1	day 0.5 B2	day 0.5 B3	day 1 B1	day 1 B2	day 1 B3	day 1.5 B1	day 1.5 B2	day 1.5 B3	day 2 B1	day 2 B2	day 2 B3	day 3 B1	day 3 B2	day 3 B3	day 4 B1	day 4 B2	day 4 B3
TKQTAR(H3_3_8)
H3_3_8 K4me1	0.999601	0.99872	0.999411	0.257003	0.259627	0.255007	0.0926963	0.0927701	0.0886346	0.0501316	0.0491624	0.0472005	0.0366419	0.0363981	0.037348	0.0240625	0.0249991	0.0247522	0.0251794	0.0260503	0.0273406
H3_3_8 K4me2	1	1	1	0.019528	0.0206037	0.0217108	0.00448325	0.00231534	6.05152e-05	0	0.000787591	0	0	0.00445313	0	0	0	0	0	0	0
H3_3_8 K4me3	1	1	1	0	0	0.000569596	0	0	0	0	0	0.0260016	0.0160478	0	0	0.0447312	0	0.0205839	0.0118542	0	0
H3_3_8 K4me11	0.000399245	0.00128005	0.000588789	0.742997	0.740373	0.744993	0.907304	0.90723	0.911365	0.949868	0.950838	0.952799	0.963358	0.963602	0.962652	0.975938	0.975001	0.975248	0.974821	0.97395	0.972659
H3_3_8 K4me21	0	0	0	0.124464	0.122727	0.123552	0.0617532	0.0646689	0.0608058	0.0505246	0.0520352	0.0490804	0.0551035	0.0514578	0.0533666	0.039748	0.0390323	0.0441856	0.0457105	0.0481783	0.0490212
H3_3_8 K4me22	0	0	0	0.838314	0.8395	0.83732	0.929699	0.928545	0.935197	0.946787	0.944321	0.948386	0.941683	0.941297	0.943625	0.958607	0.959382	0.953772	0.9521	0.949383	0.948452
H3_3_8 K4me31	0	0	0	0.00413196	0.00146294	0	0.00216181	0	0	0	0	0	0	7.78206e-05	0	0	0.00035931	0	0	7.88872e-05	5.71365e-05
H3_3_8 K4me32	0	0	0	0.117709	0.112764	0.0883005	0	0.0606963	0.0675011	0.0619008	0.051138	0.0498957	0.0504095	0.0594481	0.063511	0.0475398	0.0570372	0.0530351	0.0465085	0.0547603	0.0596174
H3_3_8 K4me33	0	0	0	0.878159	0.885773	0.91113	0.997838	0.939304	0.932499	0.938099	0.948862	0.924103	0.933543	0.940474	0.936489	0.907729	0.942604	0.926381	0.941637	0.945161	0.940325
KSTGGKAPR(H3_9_17)
H3_9_17 K9me1	0.997332	0.998045	0.998494	0.138826	0.144122	0.138764	0.0568348	0.0574838	0.0560408	0.0401558	0.0408573	0.0401101	0.0387537	0.0427873	0.0384239	0.0308374	0.0318509	0.0302324	0.0315404	0.033683	0.0336362
H3_9_17 K9me2	1	1	1	0.195231	0.199342	0.193474	0.0506394	0.0487496	0.0470324	0.0153826	0.0142902	0.0137117	0.00596234	0.00521484	0.00513193	0.00152045	0.00142505	0.00148231	0.00131695	0.0012741	0.0013442
H3_9_17 K9me3	1	1	1	0.384611	0.383789	0.378188	0.166516	0.162996	0.160078	0.0800358	0.0737147	0.0715057	0.0364903	0.0319672	0.0324998	0.00782585	0.00642019	0.00602655	0.0016979	0.00141702	0.00128976
H3_9_17 K9me1K14ac	1	1	1	0.0775849	0.0876292	0.0759134	0.636742	0	0	0	0	0	0	0.00174739	0	0	0	0	0	0	0
H3_9_17 K9me2K14ac	1	1	1	0.143897	0.1476	0.139599	0.0349695	0.0330482	0.0320454	0.0103845	0.0100227	0.009352	0.00428262	0.00380599	0.00372275	0.000786707	0.000925522	0.000660338	0.0006812	0.00107533	0.00107812
H3_9_17 K9me3K14ac	1	1	1	0.314634	0.321502	0.317668	0.130135	0.128077	0.125854	0.0574336	0.055634	0.0542945	0.0257875	0.0217624	0.0230764	0.00472431	0.00352301	0.00379605	0.000831325	0.000296066	0.000596635
H3_9_17 K9me11	0.00266793	0.00195481	0.00150603	0.861174	0.855878	0.861236	0.943165	0.942516	0.943959	0.959844	0.959143	0.95989	0.961246	0.957213	0.961576	0.969163	0.968149	0.969768	0.96846	0.966317	0.966364
H3_9_17 K9me21	0	0	0	0.188521	0.189515	0.187336	0.117486	0.116508	0.114828	0.0885909	0.0881372	0.0876997	0.0840341	0.0853068	0.0840166	0.0631848	0.0643633	0.0651634	0.0655868	0.069101	0.0690463
H3_9_17 K9me22	0	0	0	0.616248	0.611143	0.61919	0.831874	0.834743	0.83814	0.896027	0.897573	0.898589	0.910004	0.909478	0.910851	0.935295	0.934212	0.933354	0.933096	0.929625	0.929609
H3_9_17 K9me31	0	0	0	0.156355	0.158851	0.156704	0.094489	0.0950455	0.0928909	0.0521768	0.051191	0.0485167	0.0278664	0.026342	0.0258447	0.00921791	0.00843931	0.0078664	0.00485415	0.00512621	0.00478704
H3_9_17 K9me32	0	0	0	0.105634	0.104904	0.104501	0.119258	0.121184	0.121882	0.118602	0.12122	0.120438	0.121064	0.12305	0.121871	0.103198	0.105183	0.105726	0.102264	0.106044	0.106718
H3_9_17 K9me33	0	0	0	0.3534	0.352456	0.360606	0.619736	0.620774	0.62515	0.749185	0.753875	0.75954	0.814579	0.818641	0.819785	0.879758	0.879957	0.880381	0.891184	0.887413	0.887205
H3_9_17 K9me11K14ac	0	0	0	0.922415	0.912371	0.924087	0.363258	1	1	1	1	1	1	0.998253	1	1	1	1	1	1	1
H3_9_17 K9me21K14ac	0	0	0	0.175072	0.178509	0.177568	0.107886	0.108563	0.107673	0.0846989	0.0867403	0.0859442	0.0815609	0.0861184	0.0856173	0.0643088	0.066481	0.0673129	0.067926	0.0710194	0.0732252
H3_9_17 K9me22K14ac	0	0	0	0.681031	0.673891	0.682834	0.857145	0.858388	0.860282	0.904917	0.903237	0.904704	0.914156	0.910076	0.91066	0.934905	0.932593	0.932027	0.931393	0.927905	0.925697
H3_9_17 K9me31K14ac	0	0	0	0.14357	0.149842	0.145528	0.0845815	0.0865265	0.0826603	0.0448177	0.0446583	0.0436051	0.0247898	0.0232233	0.0225206	0.00771941	0.00766021	0.00750123	0.00445132	0.00504821	0.00513674
H3_9_17 K9me32K14ac	0	0	0	0.117116	0.116811	0.118457	0.128242	0.132405	0.130366	0.121803	0.121477	0.128185	0.119597	0.123085	0.123153	0.103838	0.101466	0.104887	0.101282	0.107339	0.10889
H3_9_17 K9me33K14ac	0	0	0	0.424679	0.411845	0.418347	0.657042	0.652992	0.66112	0.775946	0.778231	0.773915	0.829825	0.83193	0.83125	0.883718	0.887351	0.883815	0.893435	0.887316	0.885377
KQLATKAAR(H3_18_26)
H3_18_26 K23me1
H3_18_26 K18me1	1	1	1	0.452314	0.465758	0.487254	0.225555	0.245557	0.244768	0.166431	0.21216	0.169562	0.485464	0.603739	0.589127	0.85497	0.921573	0.882611	0.915117	0.506634	0.938818
H3_18_26 K18me1K23me1	1	1	1	1	1	1	1	1	1	1	1	1	1	1	1	1	1	1	1	1	1
H3_18_26 K18me11	0	0	0	0.547686	0.534242	0.512746	0.774445	0.754443	0.755232	0.833569	0.78784	0.830438	0.514536	0.396261	0.410873	0.14503	0.0784272	0.117389	0.0848826	0.493366	0.0611816
H3_18_26 K18me11K23me1	0	0	0	0	0	0	0	0	0	0	0	0	0	0	0	0	0	0	0	0	0
H3_18_26 K18me11K23me11	0	0	0	0	0	0	0	0	0	0	0	0	0	0	0	0	0	0	0	0	0
KSAPATGGVKKPHR(H3_27_40)
H3_27_40 K36me1
H3_27_40 K27me1	0.999568	1	0.999586	0.0680437	0.0636191	0.0647717	0.044061	0.0442754	0.0432531	0.0408273	0.0421847	0.0459167	0.0457366	0.0479883	0.047126	0.0371647	0.0372123	0.0281636	0.0393433	0.039898	0.0410735
H3_27_40 K27me2	1	0.999687	1	0.128199	0.127798	0.124152	0.028947	0.0272273	0.0257293	0.00882239	0.0078717	0.00770231	0.00383076	0.00333074	0.00321684	0.000352135	0.000478964	2.7937e-05	0.000459338	0.000884619	0.000184806
H3_27_40 K36me2	0.998142	0.998526	0.998905	0.127178	0.12676	0.126103	0.0265456	0.0263119	0.0285229	0.00730113	0.00524286	0.0064585	0.00134007	0.00224474	0.00122653	0	3.50951e-05	2.30468e-05	0.000381509	0.000331387	0.000624208
H3_27_40 K27me3	1	1	1	0.221973	0.224807	0.218138	0.0607634	0.0599863	0.0614976	0.0163263	0.0147889	0.0133654	0.00349303	0.00290815	0.00224978	0	0.0011398	0	0	0	0
H3_27_40 K36me3
H3_27_40 K27me2K36me1	1	0.999984	0.999644	0.162728	0.146285	0.155851	0.0314294	0.0285931	0.0279891	0.00679104	0.00562448	0.00626373	0.00224206	0.00163204	0.00182929	8.61245e-05	8.69362e-05	0.00276052	0	0	0
H3_27_40 K27me1K36me2	1	0.999849	1	0.19715	0.200092	0.196284	0.0501987	0.0494887	0.0490881	0	0	0	0	0	0	0	0	0	0	0	0
H3_27_40 K27me1K36me1	0.999888	0.999884	0.999812	0.066942	0.0629843	0.0635377	0.00968147	0.00782385	0.0130186	0.0049226	0.00473111	0.0117529	0.00122983	0.00169381	0.00350861	0.001614	0.000639638	0.00214514	0.00799761	0	0.000130263
H3_27_40 K27me3K36me1	0.999408	0.999746	1	0.0706467	0.110855	0.097211	0.00502245	0.0104725	0.00931611	0	0	0	0	0	0	0	0	0	0	0	0
H3_27_40 K27me1K36me3	0.999571	0.999821	0.999116	0.0191189	0.0150259	0.0207342	0	0	0	0	0	0	0	0	0	0	0	0	0	0	0
H3_27_40 K27me2K36me2	0.99985	0.99981	0.999829	0.388025	0.39266	0.386231	0.154158	0.15407	0.152946	0.0641374	0.0611614	0.0570057	0.0251783	0.0224046	0.0212109	0.00384918	0.00269058	0.00211628	8.92078e-05	4.62216e-06	0.000116467
H3_27_40 K27me3K36me2	1	1	1	0.387011	0.396206	0.387106	0.159841	0.165026	0.163728	0.0609962	0.0563211	0.0440415	0.0136696	0.0126361	0.0111482	0	0	0	0	0	0
H3_27_40 K27me11	0.000432301	0	0.000414379	0.931956	0.936381	0.935228	0.955939	0.955725	0.956747	0.959173	0.957815	0.954083	0.954263	0.952012	0.952874	0.962835	0.962788	0.971836	0.960657	0.960102	0.958926
H3_27_40 K27me21	0	0.000312811	0	0.118546	0.114478	0.116237	0.084062	0.0837864	0.0846229	0.0774778	0.0787077	0.0801589	0.0644333	0.0871517	0.0840981	0.0686104	0.0683403	0.0716367	0.0712009	0.0751148	0.0752443
H3_27_40 K27me22	0	0	0	0.753255	0.757725	0.759611	0.886991	0.888986	0.889648	0.9137	0.913421	0.912139	0.931736	0.909518	0.912685	0.931037	0.931181	0.928335	0.92834	0.924001	0.924571
H3_27_40 K36me21	0.00185846	0.0014741	0.00109527	0.1161	0.118173	0.123186	0.0869591	0.091753	0.0891031	0.0783116	0.0800654	0.0831443	0.0870439	0.0848595	0.0862576	0.0615983	0.0654989	0.0722186	0.0721408	0.0786085	0.0743018
H3_27_40 K36me22	0	0	0	0.756722	0.755067	0.750711	0.886495	0.881935	0.882374	0.914387	0.914692	0.910397	0.911616	0.912896	0.912516	0.938402	0.934466	0.927758	0.927478	0.92106	0.925074
H3_27_40 K27me31	0	0	0	0.215346	0.207028	0.207059	0.0889239	0.0881585	0.084407	0.0356387	0.0333304	0.0272097	0.0172401	0.00104324	0.0099267	0.00129677	1.36265e-05	0	0.00089759	0.000117409	0.000817083
H3_27_40 K27me32	0	0	0	0.108681	0.11681	0.113611	0.117406	0.114501	0.116514	0.112866	0.116219	0.118902	0.121717	0.129278	0.12653	0.10593	0.106926	0	0.103962	0.107826	0.10668
H3_27_40 K27me33	0	0	0	0.454	0.451355	0.461192	0.732907	0.737354	0.737581	0.835169	0.835662	0.840523	0.85755	0.866771	0.861293	0.892773	0.891921	0	0.89514	0.892056	0.892503
H3_27_40 K27me2K36me11	0	1.60769e-05	0.0003563	0.163103	0.163953	0.155759	0.0573084	0.0579381	0.0569248	0.0205613	0.0213707	0.0177755	0.00831017	0.0113161	0.00555662	0.00124553	0.00200806	0.000787902	0.000326582	0.00117473	0.000710707
H3_27_40 K27me21K36me11	0	0	0	0.131472	0.132376	0.135083	0.12	0.120526	0.119046	0.112993	0.114882	0.115605	0.121418	0.129033	0.122554	0.104123	0.107401	0.106833	0.101282	0.108798	0.106174
H3_27_40 K27me22K36me11	0	0	0	0.542697	0.557386	0.553306	0.791262	0.792943	0.79604	0.859654	0.858123	0.860356	0.86803	0.858018	0.87006	0.894546	0.890504	0.889619	0.898391	0.890028	0.893115
H3_27_40 K27me11K36me2	0	0.000150605	0	0.132239	0.133157	0.131691	0.0508717	0.0488004	0.0502616	0.0215301	0.018953	0.0191923	0.0115315	0.0106916	0.00933855	0.00331229	0.00442068	0.00528134	0.00346399	0.00375044	0.0042217
H3_27_40 K27me11K36me21	0	0	0	0.125302	0.12502	0.12434	0.117244	0.117277	0.118656	0.113816	0.114058	0.115804	0.117109	0.12038	0.117691	0.0971758	0.0979059	0.0921684	0.0989442	0.104572	0.10609
H3_27_40 K27me11K36me22	0	0	0	0.545309	0.541732	0.547685	0.781686	0.784434	0.781995	0.864654	0.866989	0.865004	0.871359	0.868928	0.87297	0.899512	0.897673	0.90255	0.897592	0.891678	0.889688
H3_27_40 K27me11K36me1	0.000112016	0.000116103	0.000188467	0.12849	0.128841	0.127686	0.0881392	0.0843023	0.086793	0.0785904	0.0794998	0.0991581	0.0811346	0.083095	0.0803452	0.0639885	0.064067	0.0660768	0.0686683	0.0767207	0.0722764
H3_27_40 K27me11K36me11	0	0	0	0.804568	0.808175	0.808776	0.902179	0.907874	0.900188	0.916487	0.915769	0.889089	0.917636	0.915211	0.916146	0.934398	0.935293	0.931778	0.923334	0.923279	0.927593
H3_27_40 K27me3K36me11	0.000591709	0.000254448	0	0.355973	0.344482	0.348632	0.158929	0.159984	0.153862	0.0671524	0.065348	0.0632326	0.0167757	0.016977	0.0139393	0.000100299	5.48063e-05	8.72286e-05	0	0	0
H3_27_40 K27me31K36me11	0	0	0	0.172975	0.164769	0.157216	0.11012	0.105787	0.103886	0.0606462	0.0546478	0.0532086	0.0331393	0.032232	0.0283627	0.0101673	0.0101054	0.00764495	0.00496592	0.00596357	0.00520884
H3_27_40 K27me32K36me11	0	0	0	0.0939876	0.0858968	0.0905916	0.122216	0.121899	0.122043	0.133565	0.137471	0.125824	0.144119	0.147675	0.149484	0.128153	0.133527	0.132801	0.120605	0.130598	0.135624
H3_27_40 K27me33K36me11	0	0	0	0.306418	0.293997	0.306349	0.603712	0.601857	0.610894	0.738636	0.742533	0.757735	0.805966	0.803116	0.808214	0.861579	0.856313	0.859467	0.874429	0.863438	0.859167
H3_27_40 K27me11K36me3	0.000429249	0.000179242	0.000883778	0.302078	0.297565	0.294368	0.105989	0.0965968	0.0905754	0.0299117	0.028942	0.0244242	0.00338135	0.00278829	0.00318911	0	0	0.0032036	0.000130303	2.89656e-05	0.000493257
H3_27_40 K27me11K36me31	0	0	0	0.181797	0.18092	0.182315	0.0893659	0.0923227	0.0844832	0.0408676	0.0365326	0.0351581	0.0194872	0.0170601	0.0180976	0.00588485	0.0051082	0.0036932	0.00289893	0.00419788	0.00500726
H3_27_40 K27me11K36me32	0	0	0	0.133549	0.132852	0.126482	0.1395	0.140187	0.14845	0.139011	0.14158	0.135668	0.138884	0.14055	0.140693	0.118996	0.121423	0.118601	0.115316	0.124682	0.123691
H3_27_40 K27me11K36me33	0	0	0	0.363457	0.373637	0.3761	0.665146	0.670894	0.676492	0.790209	0.792945	0.80475	0.838248	0.839602	0.838021	0.87512	0.873469	0.874502	0.881655	0.871092	0.870808
H3_27_40 K27me21K36me2	0.000149998	0.000190244	0.000170638	0.178887	0.17735	0.177675	0.0992395	0.0985294	0.0985768	0.049236	0.047902	0.0468917	0.0229972	0.0208709	0.0207128	0.00443847	0.00346997	0.00278417	0.000111532	2.72567e-05	9.50616e-05
H3_27_40 K27me22K36me2	0	0	0	0.0971664	0.0982568	0.0967794	0.0703712	0.0688232	0.0668962	0.0403296	0.0391905	0.0409437	0.0247121	0.023412	0.0242446	0.0107086	0.0104551	0.0122189	0.0077896	0.00799829	0.00817035
H3_27_40 K27me22K36me21	0	0	0	0.0785353	0.0766693	0.0781615	0.114602	0.115909	0.117371	0.12748	0.131336	0.132141	0.140261	0.143976	0.1436	0.128749	0.130322	0.131552	0.128851	0.132568	0.133389
H3_27_40 K27me22K36me22	0	0	0	0.257387	0.255063	0.261153	0.561629	0.562668	0.56421	0.718817	0.72041	0.723018	0.786851	0.789336	0.790232	0.852255	0.853063	0.851329	0.863159	0.859402	0.858229
H3_27_40 K27me3K36me21	0	0	0	0.241282	0.241654	0.246721	0.117429	0.107479	0.114852	0.0373675	0.034568	0.0340946	0.00134206	0.000420274	0.000586293	6.36734e-06	0	0	0	0	0
H3_27_40 K27me3K36me22	0	0	0	0.140236	0.140828	0.136712	0.133442	0.130808	0.127584	0.0837481	0.0814688	0.0790172	0.0477049	0.0427899	0.0426698	0.0100017	0.0087863	0.00494048	0.000391738	0.000839601	0.000144467
H3_27_40 K27me33K36me2	0	0	0	0.0686129	0.064349	0.0676848	0.0848277	0.0834115	0.0814515	0.0643578	0.0618613	0.06452	0.0466492	0.0463686	0.0445093	0.018997	0.0195036	0.0203814	0.0122313	0.0111144	0.0130626
H3_27_40 K27me33K36me21	0	0	0	0.0461336	0.0418213	0.0424818	0.107209	0.107987	0.108517	0.140497	0.143901	0.148936	0.163131	0.168247	0.164095	0.157882	0.160418	0.159864	0.154182	0.153897	0.159167
H3_27_40 K27me33K36me22
KSAPSTGGVKKPHR(H33_27_40)
H33_27_40 K36me1
H33_27_40 K27me1	1	1	1	0.00722123	0.00536668	0.00417372	0.00529019	0.00389016	0.00362316	0.00560211	0.00515264	0.00566069	0.00961122	0.0167268	0.00304899	0.00430518	0.0106744	0	0.00822076	0.00528063	0.00253177
H33_27_40 K27me2	1	1	0.998502	0.0873811	0.0950983	0.0931378	0.0170503	0.0162282	0.0148024	0.00104736	0	0	0	0.000160182	0	0	0	0	0	0	0
H33_27_40 K36me2	0.999847	0.999661	0.999525	0.0917806	0.0916239	0.0900823	0.0023568	0.00584852	0.00410138	0	0	0	0	0	0	0	0	0.00155686	0	0	0
H33_27_40 K27me3	1	1	1	0.290451	0.305475	0.277814	0.15418	0.226384	0.150736	0.0917541	0.169682	1	0.110802	0.124016	0.132261	0.0970109	0.0536919	0.162344	0	0	0
H33_27_40 K36me3
H33_27_40 K27me2K36me1	0.999912	1	0.999119	0.0816352	0.0827841	0.0828213	0.0215564	0.018012	0.0141882	0	0.000928073	0	0.00128879	0.000798462	0.00111097	1	0.00135428	0	0	0	0
H33_27_40 K27me1K36me2	1	0.999882	0.999915	0.165529	0.175129	0.18878	0.0279414	0.0395717	0.0387255	0	0	0	0	0	0	0	0	0	0	0	0
H33_27_40 K27me1K36me1	1	0.999144	1	0	0.00210287	0	0	0	0	0	0	0	0	0	0	0	0	0	0	0	0.0342327
H33_27_40 K27me3K36me1	0.999549	0.999282	1	0.156319	0.183826	0.163842	0.000794065	0	0	0	0	0	0	0	0	0	0	0	0	0	0
H33_27_40 K27me1K36me3	1	1	1	0.0681655	0.0601788	0.0565137	0	0	0	0	0	0	0	0	0	0	0	0	0	0	0
H33_27_40 K27me2K36me2	0.999755	0.999846	0.999871	0.276468	0.377782	0.272212	0.00248243	0.0184418	0.00251723	0	0	0	0	0	0	0	0	0	0	0	0
H33_27_40 K27me3K36me2	1	1	0.999329	0.331562	0.341015	0.366556	0.0962885	0.0956154	0.101047	0.0107859	0.0107392	0	0	0	0	0	0	0	0	0	0
H33_27_40 K27me11	0	0	0	0.992779	0.994633	0.995826	0.99471	0.99611	0.996377	0.994398	0.994847	0.994339	0.990389	0.983273	0.996951	0.995695	0.989326	1	0.991779	0.994719	0.997468
H33_27_40 K27me21	0	0	0.00149797	0.0990552	0.0888627	0.0951309	0.0681419	0.0718698	0.0675528	0.0611544	0.0685294	0.0346674	0.0792456	0.0694938	0.0753745	0.0664	0.0534511	0.0524255	0.0597327	0.0665196	0.0600354
H33_27_40 K27me22	0	0	0	0.813564	0.816039	0.811731	0.914808	0.911902	0.917645	0.937798	0.931471	0.965333	0.920754	0.930346	0.924626	0.9336	0.946549	0.947574	0.940267	0.93348	0.939965
H33_27_40 K36me21	0.000152542	0.000338803	0.00047527	0.10145	0.0951336	0.0975532	0.0637988	0.0562704	0.0553678	0.0452597	0.060086	0.0384103	0.0571078	0.0736668	0.0412507	0.0283067	0.0459489	0.0258757	0.0460976	0.0296874	0.035152
H33_27_40 K36me22	0	0	0	0.80677	0.813243	0.812364	0.933844	0.937881	0.940531	0.95474	0.939914	0.96159	0.942892	0.926333	0.958749	0.971693	0.954051	0.972567	0.953902	0.970313	0.964848
H33_27_40 K27me31	0	0	0	0.132123	0.117362	0.159026	0.0373793	0.0463346	0.0449459	0.0147252	0.00345594	0	0.00383124	0.000832698	0.000886952	0	0	0	0	0	0.000719484
H33_27_40 K27me32	0	0	0	0.0885822	0.0496737	0.0705455	0.095692	0.0874559	0.0773807	0.102663	0.0789613	0	0.106682	0.107	0.0999982	0.0875655	0.10318	0.0897748	0.103855	0.0986948	0.100759
H33_27_40 K27me33	0	0	0	0.488844	0.527489	0.492614	0.712748	0.639826	0.726937	0.790858	0.747901	0	0.778685	0.768151	0.766853	0.815424	0.843128	0.747881	0.896145	0.901305	0.898521
H33_27_40 K27me2K36me11	8.75962e-05	0	0.000881314	0.116101	0.119241	0.129222	0.0367118	0.0316393	0.0330814	0.00638017	0.00830241	0.000999518	0.00030649	0.00222462	0.000236944	0	0.000138367	6.72338e-05	0.000145779	0	5.66137e-05
H33_27_40 K27me21K36me11	0	0	0	0.12743	0.127983	0.112653	0.0954578	0.100495	0.109607	0.0930357	0.101692	0.0914691	0.103537	0.107097	0.0937296	0	0.0834349	0.0815873	0.0829287	0	0.0900808
H33_27_40 K27me22K36me11	0	0	0	0.674834	0.669992	0.675304	0.846274	0.849854	0.843124	0.900584	0.889077	0.907531	0.894868	0.88988	0.904922	0	0.915072	0.918345	0.916925	0	0.909863
H33_27_40 K27me11K36me2	0	0.000117955	8.5342e-05	0.132667	0.129608	0.121059	0.0616005	0.0356515	0.0458654	0.00746375	0.0095189	0.0191952	0.00232336	0.000968617	0.000699383	9.33452e-05	0.0079554	0.000153383	0.0175181	0.00508439	0.0123283
H33_27_40 K27me11K36me21	0	0	0	0.121942	0.120512	0.119843	0.107165	0.114485	0.119686	0.111292	0.108412	0.105048	0.114078	0.114767	0.102345	0.0915888	0.0947769	0.0801675	0.0924705	0.0975571	0.0980118
H33_27_40 K27me11K36me22	0	0	0	0.579862	0.574751	0.570318	0.803293	0.810291	0.795723	0.881244	0.882069	0.875757	0.883599	0.884264	0.896956	0.908318	0.897268	0.919679	0.890011	0.897359	0.88966
H33_27_40 K27me11K36me1	0	0	0	0.0391728	0.0277395	0.00218722	0.000316661	0	0	0	0	0	0	0.00352843	0	0.000667287	0.000894243	0	0	0.00164066	0
H33_27_40 K27me11K36me11	0	0.000855563	0	0.960827	0.970158	0.997813	0.999683	1	1	1	1	1	1	0.996472	1	0.999333	0.999106	1	1	0.998359	0.965767
H33_27_40 K27me3K36me11	0.000450932	0	0	0.288847	0.308589	0.321685	0.0988064	0.0226055	0.0708262	0.0203103	0.0779876	0.00288457	0	0.0970772	0	0	0	0	0	0	0
H33_27_40 K27me31K36me11	0	0.000717772	0	0.117263	0.0866226	0.0944493	0.247897	0.158035	0.38701	0.0903387	0.00539004	0.208438	0.0308196	0.00295639	0.0750825	0.00549102	0.241938	0.0244927	0.212339	0.153193	0.236745
H33_27_40 K27me32K36me11	0	0	0	0.0635379	0.00332632	0	0.00456665	0.00516854	0.0154341	0.103001	0.0864384	0	0.0908471	0.00969174	0.0154129	0.085911	0.0663976	0	0.0864083	0.0685821	0.0239996
H33_27_40 K27me33K36me11	0	0	0	0.374034	0.417636	0.420024	0.647936	0.814191	0.52673	0.78635	0.830184	0.788677	0.878333	0.890275	0.909505	0.908598	0.691665	0.975507	0.701253	0.778225	0.739255
H33_27_40 K27me11K36me3	0	0	0	0.284753	0.263824	0.302395	0.0967112	0.0914493	0.0953083	0.062144	0.0181477	0.0379641	0.0359627	0.0231343	0.0207079	0.0261927	0.0585836	0	0	0.0499875	0
H33_27_40 K27me11K36me31	0	0	0	0.143481	0.167584	0.188163	0.0658256	0.0673137	0.0768509	0.0218906	0.0211311	0.0145878	0.00546571	0.00820501	0.00322538	0.00016861	0.00033407	0.0082022	0.000313872	0.000125215	0.0156927
H33_27_40 K27me11K36me32	0	0	0	0.123569	0.119088	0.118702	0.147725	0.135474	0.151317	0.128523	0.146681	0.115741	0.134101	0.122358	0.125414	0.123432	0.118456	0.0652203	0.0912229	0.104425	0.0888459
H33_27_40 K27me11K36me33	0	0	0	0.380031	0.389325	0.334226	0.689738	0.705763	0.676524	0.787442	0.81404	0.831707	0.82447	0.846303	0.850653	0.850206	0.822626	0.926577	0.908463	0.845463	0.895461
H33_27_40 K27me21K36me2	0.000244542	0.000153726	0.000129074	0.0174553	0.0340131	0.00830608	0.111243	0.0987608	0.0752181	0.00665205	0.00108346	0.0356792	0.000262611	0.00115756	0.000942133	0.00014576	0.000156856	0.000202028	0	7.6207e-05	0
H33_27_40 K27me22K36me2	0	0	0	0.0106939	0.0137256	0.016696	0.00938356	0.00719203	0.0142554	0.00106649	0.000409466	0.00391503	0.000436222	0.000294405	0.000830835	0.000579969	0.000516882	0.000741551	0.000351208	0.00173984	0.000190378
H33_27_40 K27me22K36me21	0	0	0	0.0819494	0.0614314	0.0491308	0.128503	0.119131	0.126809	0.128467	0.134975	0.136528	0.13894	0.139191	0.134032	0.119542	0.115122	0.124347	0.119106	0.119656	0.125361
H33_27_40 K27me22K36me22	0	0	0	0.613434	0.513048	0.653656	0.748388	0.756474	0.7812	0.863814	0.863532	0.823878	0.860361	0.859357	0.864195	0.879732	0.884204	0.87471	0.880543	0.878528	0.874449
H33_27_40 K27me3K36me21	0	0	0.000670776	0.213272	0.234585	0.217648	0.0492372	0.0370425	0.0239588	0	8.53661e-05	0.000365219	0.00439451	6.47445e-05	0.000655517	0.000362483	9.10645e-05	0	0.00123268	0	0.000274389
H33_27_40 K27me3K36me22	0	0	0	0.155088	0.15399	0.13904	0.13195	0.123967	0.122701	0.0611726	0.074864	0.0582881	0.0281532	0.016431	0.0207912	0.00872182	0.0251946	0.00243226	0.0044601	0.00596734	0.0153836
H33_27_40 K27me33K36me2	0	0	0	0.0559824	0.0400515	0.0439005	0.0615643	0.0435568	0.053058	0.0343293	0.0384487	0.0304515	0.0236206	0.0133912	0.0109706	0.00267932	0.00118874	0.00104501	0.000992591	0.00101774	0.00116975
H33_27_40 K27me33K36me21	0	0	0	0.0374494	0.0360871	0.0382188	0.110099	0.119822	0.131704	0.148695	0.153127	0.14613	0.161233	0.161634	0.165622	0.143709	0.148116	0.149913	0.141607	0.153356	0.143372
H33_27_40 K27me33K36me22	0	0	0	0.206646	0.194272	0.194636	0.550861	0.579996	0.567532	0.745017	0.722736	0.764765	0.782599	0.808479	0.801961	0.844527	0.825409	0.84661	0.851708	0.839659	0.8398
YQKSTELLIR(H3_54_63)
H3_54_63 K56me1	0.0910922	0	0	0	0.506653	0.894905	0	0.97646	0.704174	0	0.128525	0.760205	0.79026	0.909803	0.888474	0.205963	0.975664	1	0.744647	0	0.123755
H3_54_63 K56me2	0.99923	0.959921	1	1	1	1	0.0568296	0.804178	0.381912	0.715347	0.995583	0.149562	0.976938	0.356304	1	0.960685	0.119219	1	0.106315	0.0179351	0.00796191
H3_54_63 K56me3	0	0	0	0	1	0	0	0.0022796	0.793901	0	0	0	0	0.443289	0	0	0	0	0	0	0
H3_54_63 K56me11	0.908908	1	0	1	0.493347	0.105095	1	0.0235398	0.295826	1	0.871475	0.239795	0.20974	0.0901974	0.111526	0.794037	0.0243362	0	0.255353	1	0.876245
H3_54_63 K56me21	0.000770473	0.0400791	0	0	0	0	0.933773	0.195822	0.617731	0.284653	0.00441707	0.815114	0.00615281	0.643696	0	0.0393153	0.880781	0	0.893144	0.982065	0.992038
H3_54_63 K56me22	0	0	0	0	0	0	0.00939758	0	0.000357565	0	0	0.0353241	0.0169087	0	0	0	0	0	0.000541442	0	0
H3_54_63 K56me31	1	1	0	0	0	0	0	0.996807	0	0	1	0.182092	1	0	0.200195	1	1	0.140783	0	0	0.232533
H3_54_63 K56me32	0	0	0	0	0	0	1	0	0.206099	0	0	0.817908	0	0.556711	0.2961	0	0	0.0950572	0	0	0.767467
H3_54_63 K56me33	0	0	0	0	0	0	0	0.000913792	0	0	0	0	0	0	0.503705	0	0	0.76416	0	0	0
EIAQDFKTDLR(H3_73_83)
H3_73_83 K79me1	0.99951	0.999545	1	0.41103	0.412658	0.411753	0.191287	0.190173	0.175642	0.106235	0.103575	0.095791	0.0758204	0.0668249	0.0669902	0.0366513	0.0389289	0.0354336	0.0370685	0.0311244	0.0369727
H3_73_83 K79me2	0.965689	0.90389	0.941001	0.3604	0.371482	0.423444	0.136518	0.035619	0	0.217742	0.0640568	0	0	0	0	0	0	0	0	0	0
H3_73_83 K79me3	0.997862	0.642598	0.43289	0.851412	0.0775234	0.868484	0.120468	0.116641	0.689465	0.271297	0.219794	0.0628361	0.00875926	0.0877692	0.0196107	0.743218	0.00543893	0.006896	0.0125402	0.00119535	0.43313
H3_73_83 K79me11	0.000490169	0.000454577	0	0.58897	0.587342	0.588247	0.808713	0.809827	0.824358	0.893765	0.896425	0.904209	0.92418	0.933175	0.93301	0.963349	0.961071	0.964566	0.962932	0.968876	0.963027
H3_73_83 K79me21	0	0	0	0.253861	0.272431	0.291778	0.861871	0.286269	0.289827	0.779065	0.163783	0.996645	0.139083	1	0.0852225	1	0.0887954	0.071647	0.0378435	0.0623572	0.0759306
H3_73_83 K79me22	0.0343106	0.0961095	0.0589992	0.385739	0.356088	0.284777	0.00161115	0.678112	0.710173	0.00319284	0.77216	0.00335541	0.860917	0	0.914777	0	0.911205	0.928353	0.962157	0.937643	0.924069
H3_73_83 K79me31	0	0	0	0.00526645	0	0.114933	0.878391	0.876419	0.308986	0.728703	0	0.936845	0.00376424	0.911634	0.00569819	0.25408	0.000683873	0.00238183	0.00740113	0.00141431	0.559746
H3_73_83 K79me32	0	0.355688	0.566321	0.143322	0.0215069	0.0165825	0	0.00694048	0.00154961	0	0.0047841	0	4.07846e-05	0.000413112	6.20607e-05	0	0.000348088	9.45697e-06	2.45562e-05	0	0
H3_73_83 K79me33	0.00213848	0.001714	0.000789686	0	0.90097	0	0.00114033	0	0	0	0.775422	0.000319325	0.987436	0.000183932	0.974629	0.0027019	0.993529	0.990713	0.980034	0.99739	0.00712372
VTIMPKDIQLAR(H3_117_128)
H3_117_128 unmod	0.999954	0.99996	0.999979	0.480587	0.475687	0.47808	0.165478	0.0995761	0.248205	0.0780535	0.139011	0.136159	0.0472965	0.0826911	0.0900373	0.0512724	0.0529617	0.0508504	0.0450592	0.0338833	0.0460104
H3_117_128 M120cd3	4.56821e-05	4.04526e-05	2.05261e-05	0.519413	0.524313	0.52192	0.834522	0.900424	0.751795	0.921946	0.860989	0.863841	0.952703	0.917309	0.909963	0.948728	0.947038	0.94915	0.954941	0.966117	0.95399
KVLR(H4_20_23)
H4_20_23 K20me1	1	1	1	0.119633	0.123279	0.123214	0.0562925	0.056344	0.0562866	0.0445089	0.0447572	0.0451119	0.0449101	0.0478313	0.0461592	0.0351962	0.0359334	0.0360834	0.0358604	0.0366444	0.0371439
H4_20_23 K20me2	1	1	1	0.0608966	0.0612388	0.0538181	0.0164362	0.0207073	0.0188982	0.00688968	0.00680564	0.00664406	0.00304949	0.00340612	0.00266783	0.000381696	0.000596479	4.33614e-05	0	0	0
H4_20_23 K20me3	1	1	1	0.464847	0.464077	0.45578	0.21549	0.215928	0.20955	0.104862	0.102738	0.0993376	0.0486331	0.0478098	0.0456194	0.0100517	0.0104019	0.00805253	0	0	0
H4_20_23 K20me11	0	0	0	0.880367	0.876721	0.876786	0.943707	0.943656	0.943713	0.955491	0.955243	0.954888	0.95509	0.952169	0.953841	0.964804	0.964067	0.963917	0.96414	0.963356	0.962856
H4_20_23 K20me21	0	0	0	0.224711	0.222946	0.220756	0.124993	0.124392	0.123071	0.0916278	0.0906865	0.0903825	0.0821901	0.084305	0.0826147	0.0621277	0.065132	0.0653648	0.0601609	0.0631867	0.0646407
H4_20_23 K20me22	0	0	0	0.714392	0.715816	0.725426	0.858571	0.854901	0.858031	0.901483	0.902508	0.902973	0.91476	0.912289	0.914717	0.937491	0.934272	0.934592	0.939839	0.936813	0.935359
H4_20_23 K20me31	0	0	0	0.288402	0.290238	0.294616	0.251466	0.248029	0.249235	0.166092	0.167619	0.161322	0.104086	0.0978507	0.0938759	0.0327922	0.0307747	0.0279372	0.00636245	0.00901586	0.00833051
H4_20_23 K20me32	0	0	0	0.0544632	0.0540679	0.0539625	0.0877628	0.0864341	0.0885674	0.0998722	0.102564	0.0971588	0.107012	0.115283	0.110387	0.104523	0.105996	0.105134	0.0988214	0.0993158	0.10251
H4_20_23 K20me33	0	0	0	0.192288	0.191618	0.195642	0.44528	0.449609	0.452648	0.629174	0.62708	0.642182	0.740269	0.739057	0.750117	0.852633	0.852828	0.858876	0.894816	0.891668	0.889159
KTVTAMDVVYALKR(H4_79_92)
H4_79_92 unmod	0.999867	0.999943	0.999895	0.475685	0.484777	0.476193	0.25206	0.240336	0.2363	0.137649	0.130843	0.133163	0.087521	0.0898656	0.0850168	0.0500832	0.0467875	0.0449613	0.0400656	0.0406559	0.0442489
H4_79_92 M84cd3	0.000132908	5.74239e-05	0.000104632	0.524315	0.515223	0.523807	0.74794	0.759664	0.7637	0.862351	0.869157	0.866837	0.912479	0.910134	0.914983	0.949917	0.953212	0.955039	0.959934	0.959344	0.955751

## Sheet: differentiation
Peptide	unlabeled B1	unlabeled B2	unlabeled B3	0.5 B1	0.5 B2	0.5 B3	1 B1	1 B2	1 B3	1.5 B1	1.5 B2	1.5 B3	2 B1	2 B2	2 B3	3 B1	3 B2	3 B3	4 B1	4 B2	4 B3
TKQTAR(H3_3_8)
H3_3_8 K4me1	0.999601	0.99872	0.999411	0.343608	0.346184	0.340013	0.187597	0.173095	0.166656	0.168749	0.160565	0.144516	0.185219	0.174476	0.159179	0.128329	0.112847	0.104467	0.126148	0.114322	0.109011
H3_3_8 K4me2	1	1	1	0.0395356	0.0357868	0.0340358	0.0138677	0.0113448	0.0112738	0.0235713	0.0214513	0.0183799	0.0384896	0.0367137	0.0291171	0.0157576	0.0112815	0.0107077	0.019706	0.0164604	0.0145205
H3_3_8 K4me3	1	1	1	0.00222673	0.0015597	6.0346e-05	0	0	0	0	0	0	0	0.00174408	0	0	0	0	0	0	0
H3_3_8 K4me11	0.000399245	0.00128005	0.000588789	0.656392	0.653816	0.659987	0.812403	0.826905	0.833344	0.831251	0.839435	0.855484	0.814781	0.825524	0.840821	0.871671	0.887153	0.895533	0.873852	0.885678	0.890989
H3_3_8 K4me21	0	0	0	0.224371	0.215288	0.209015	0.184589	0.17203	0.157171	0.241397	0.232427	0.207021	0.285094	0.27529	0.256776	0.203167	0.172134	0.173908	0.221365	0.206176	0.1963
H3_3_8 K4me22	0	0	0	0.736093	0.748925	0.756949	0.801543	0.816625	0.831555	0.735032	0.746122	0.774599	0.676417	0.687996	0.714107	0.781075	0.816584	0.815385	0.758929	0.777364	0.78918
H3_3_8 K4me31	0	0	0	0.0408749	0.0371916	0.028269	0.00471027	0.00935441	0.00162601	0.0255207	0.0203241	0.00634615	0.061123	0.0575076	0.0218158	0.00417898	0.0213161	0.000961245	0.0253909	0.00405835	0.000812943
H3_3_8 K4me32	0	0	0	0.169865	0.160381	0.150869	0.1395	0.133392	0.128643	0.195995	0.188502	0.179826	0.228556	0.233585	0.218645	0.194589	0.169584	0.174158	0.214942	0.210587	0.209023
H3_3_8 K4me33	0	0	0	0.787033	0.800867	0.820801	0.855789	0.857254	0.869731	0.778484	0.791174	0.813828	0.710321	0.707163	0.759539	0.801232	0.8091	0.82488	0.759667	0.785355	0.790164
KSTGGKAPR(H3_9_17)
H3_9_17 K9me1	0.997332	0.998045	0.998494	0.225848	0.216109	0.210898	0.148575	0.137196	0.128214	0.189328	0.181649	0.161118	0.232943	0.221754	0.196449	0.152642	0.130621	0.129942	0.166537	0.156874	0.147992
H3_9_17 K9me2	1	1	1	0.289929	0.277582	0.269225	0.0995532	0.0926938	0.0878971	0.0625876	0.0565866	0.0486045	0.0647288	0.0583197	0.0476087	0.032748	0.027088	0.0251401	0.0347078	0.0314817	0.0286928
H3_9_17 K9me3	1	1	1	0.511166	0.496395	0.489364	0.260702	0.247991	0.237151	0.151054	0.134461	0.12324	0.0932153	0.0817633	0.0739193	0.0374818	0.0332067	0.0293981	0.02177	0.0209176	0.0181978
H3_9_17 K9me1K14ac	1	1	1	0.151493	0.13932	0.135742	0.121899	0.11415	0.0994573	0.178023	0.170262	0.149721	0.228166	0.219104	0.188255	0.142139	0.120248	0.117731	0.164314	0.158633	0.144031
H3_9_17 K9me2K14ac	1	1	1	0.225678	0.217982	0.21432	0.0774615	0.0727098	0.0700729	0.0568988	0.0515301	0.0425791	0.0646816	0.0574004	0.0469795	0.0314879	0.0261437	0.0233466	0.0343317	0.0306233	0.0281596
H3_9_17 K9me3K14ac	1	1	1	0.442029	0.424768	0.425947	0.227602	0.207161	0.206131	0.135684	0.121641	0.111265	0.0883957	0.0719768	0.0663114	0.0329516	0.0294438	0.0224764	0.0198616	0.0145354	0.0143425
H3_9_17 K9me11	0.00266793	0.00195481	0.00150603	0.774152	0.783891	0.789102	0.851425	0.862804	0.871786	0.810672	0.818351	0.838882	0.767057	0.778246	0.803551	0.847358	0.869379	0.870058	0.833463	0.843126	0.852008
H3_9_17 K9me21	0	0	0	0.230376	0.228041	0.22456	0.23163	0.218424	0.211523	0.284178	0.272092	0.256219	0.341065	0.324119	0.302824	0.276916	0.250153	0.248694	0.291793	0.284199	0.27685
H3_9_17 K9me22	0	0	0	0.479695	0.494377	0.506215	0.668817	0.688882	0.70058	0.653234	0.671322	0.695176	0.594206	0.617561	0.649567	0.690336	0.722759	0.726166	0.673499	0.68432	0.694457
H3_9_17 K9me31	0	0	0	0.153803	0.15552	0.152244	0.119865	0.11818	0.113796	0.110959	0.106172	0.0962094	0.125132	0.115304	0.102702	0.0918987	0.0802481	0.0731848	0.0893403	0.0845177	0.0771582
H3_9_17 K9me32	0	0	0	0.0998286	0.101165	0.0999384	0.181507	0.181035	0.176365	0.262364	0.260902	0.254464	0.329531	0.323089	0.313744	0.339007	0.319725	0.314564	0.346459	0.340027	0.33614
H3_9_17 K9me33	0	0	0	0.235202	0.246919	0.258453	0.437926	0.452794	0.472688	0.475624	0.498465	0.526087	0.452122	0.479843	0.509635	0.531612	0.56682	0.582853	0.542431	0.554538	0.568504
H3_9_17 K9me11K14ac	0	0	0	0.848507	0.86068	0.864258	0.878101	0.88585	0.900543	0.821977	0.829738	0.850279	0.771834	0.780896	0.811745	0.857861	0.879752	0.882269	0.835686	0.841367	0.855969
H3_9_17 K9me21K14ac	0	0	0	0.224929	0.219272	0.21607	0.230124	0.222457	0.218241	0.293406	0.279869	0.268976	0.352607	0.338509	0.319711	0.283079	0.260844	0.255051	0.301816	0.291339	0.283263
H3_9_17 K9me22K14ac	0	0	0	0.549393	0.562747	0.569611	0.692415	0.704833	0.711686	0.649695	0.668601	0.688444	0.582711	0.604091	0.633309	0.685433	0.713012	0.721602	0.663852	0.678037	0.688578
H3_9_17 K9me31K14ac	0	0	0	0.152634	0.154316	0.153781	0.123431	0.12221	0.117319	0.121235	0.113733	0.103026	0.134467	0.124092	0.10783	0.0931231	0.0824677	0.0758401	0.0903396	0.0843816	0.0752314
H3_9_17 K9me32K14ac	0	0	0	0.115998	0.117617	0.118725	0.201353	0.195353	0.193085	0.273781	0.269831	0.261166	0.334255	0.330012	0.319567	0.345303	0.327331	0.321703	0.356028	0.343157	0.334926
H3_9_17 K9me33K14ac	0	0	0	0.289339	0.3033	0.301546	0.447615	0.475276	0.483464	0.469299	0.494795	0.524543	0.442882	0.473919	0.506292	0.528622	0.560758	0.579981	0.53377	0.557926	0.5755
KQLATKAAR(H3_18_26)
H3_18_26 K23me1
H3_18_26 K18me1	1	1	1	0.569677	0.564596	0.57655	0.328958	0.325623	0.336377	0.278768	0.278295	0.222519	0.278302	0.261527	0.250714	0.19168	0.181913	0.355829	0.186875	0.183844	0.169079
H3_18_26 K18me1K23me1	1	1	1	1	1	1	1	1	1	1	1	1	1	1	1	1	1	1	1	0.999788	1
H3_18_26 K18me11	0	0	0	0.430323	0.435404	0.42345	0.671042	0.674377	0.663623	0.721232	0.721705	0.777481	0.721698	0.738473	0.749286	0.80832	0.818087	0.644171	0.813125	0.816156	0.830921
H3_18_26 K18me11K23me1	0	0	0	0	0	0	0	0	0	0	0	0	0	0	0	0	0	0	0	0.000117048	0
H3_18_26 K18me11K23me11	0	0	0	0	0	0	0	0	0	0	0	0	0	0	0	0	0	0	0	9.4827e-05	0
KSAPATGGVKKPHR(H3_27_40)
H3_27_40 K36me1
H3_27_40 K27me1	0.999568	1	0.999586	0.120753	0.110191	0.107849	0.139433	0.127353	0.12035	0.205359	0.201333	0.176364	0.258301	0.244616	0.219686	0.17642	0.151747	0.149757	0.193731	0.18173	0.172695
H3_27_40 K27me2	1	0.999687	1	0.211347	0.19651	0.190055	0.0720552	0.0624009	0.0572374	0.0586943	0.052468	0.0435853	0.0679482	0.0620904	0.0496503	0.0346407	0.0274073	0.0264815	0.0359444	0.0343529	0.0303687
H3_27_40 K36me2	0.998142	0.998526	0.998905	0.197555	0.188012	0.183598	0.0726576	0.0607556	0.0585337	0.0549427	0.0552878	0.0392777	0.0723349	0.0635344	0.0498226	0.0353264	0.0253844	0.0232478	0.0372062	0.0395555	0.0297253
H3_27_40 K27me3	1	1	1	0.34474	0.333485	0.32348	0.140821	0.127067	0.120252	0.0762018	0.0612763	0.0548374	0.0424867	0.0381262	0.0286224	0.0163328	0.012812	0.00981108	0.0100102	0.00909067	0.00652847
H3_27_40 K36me3
H3_27_40 K27me2K36me1	1	0.999984	0.999644	0.274196	0.261952	0.24676	0.086425	0.0751932	0.0681209	0.0404496	0.0324643	0.0275179	0.0252909	0.0204624	0.0163729	0.00809928	0.00634918	0.00497768	0.00532785	0.00506637	0.00407986
H3_27_40 K27me1K36me2	1	0.999849	1	0.27175	0.257402	0.253621	0.0862769	0.0784544	0.0757993	0.0423071	0.0363144	0.0318216	0.0300439	0.0247601	0.0209567	0	0	0	0	0	0
H3_27_40 K27me1K36me1	0.999888	0.999884	0.999812	0.112577	0.104459	0.100514	0.0344727	0.0325189	0.0246663	0.0366721	0.0372426	0.0256334	0.0717081	0.0534863	0.042126	0.0236768	0.0243836	0.0165418	0.032329	0.026633	0.0244224
H3_27_40 K27me3K36me1	0.999408	0.999746	1	0.241661	0.146691	0.17935	0.0340252	0.022667	0.033849	0.00373812	0.00737231	0.000252745	0.00553031	0.000178793	0.000846183	0	0	0	0	0	0
H3_27_40 K27me1K36me3	0.999571	0.999821	0.999116	0.0819203	0.0437313	0.0674574	0.00281035	0.00146989	0.00168801	0	0.000498532	0	0.00169249	0	0	0	0	0	0	0	0
H3_27_40 K27me2K36me2	0.99985	0.99981	0.999829	0.483946	0.475708	0.465898	0.233731	0.221236	0.217555	0.131656	0.119354	0.111878	0.0757133	0.0687808	0.0631328	0.0280226	0.0266437	0.0230536	0.0129459	0.0141039	0.0107472
H3_27_40 K27me3K36me2	1	1	1	0.480853	0.477151	0.470798	0.246877	0.237267	0.227922	0.136603	0.124031	0.111295	0.0636387	0.0586083	0.0451986	0	0	0	0	0	0
H3_27_40 K27me11	0.000432301	0	0.000414379	0.879247	0.889809	0.892151	0.860567	0.872647	0.87965	0.794641	0.798667	0.823636	0.741699	0.755384	0.780314	0.82358	0.848253	0.850243	0.806269	0.81827	0.827305
H3_27_40 K27me21	0	0.000312811	0	0.165797	0.164409	0.161104	0.207574	0.196605	0.186976	0.291279	0.281662	0.261919	0.35403	0.344394	0.31719	0.290599	0.263035	0.263492	0.303681	0.292633	0.28287
H3_27_40 K27me22	0	0	0	0.622856	0.639081	0.648841	0.72037	0.740994	0.755787	0.650026	0.66587	0.694496	0.578022	0.593516	0.633159	0.67476	0.709558	0.710027	0.660375	0.673014	0.686762
H3_27_40 K36me21	0.00185846	0.0014741	0.00109527	0.167083	0.162414	0.163417	0.207575	0.197682	0.193452	0.292669	0.276676	0.266003	0.355138	0.33885	0.327877	0.279734	0.244293	0.246081	0.303797	0.287012	0.276989
H3_27_40 K36me22	0	0	0	0.635362	0.649574	0.652985	0.719768	0.741563	0.748015	0.652388	0.668037	0.69472	0.572527	0.597616	0.622301	0.684939	0.730323	0.730671	0.658997	0.673433	0.693286
H3_27_40 K27me31	0	0	0	0.246205	0.235817	0.237961	0.15737	0.146547	0.136306	0.130225	0.119657	0.103886	0.146491	0.127484	0.11228	0.0971111	0.0827069	0.0755498	0.0912627	0.0844778	0.0763046
H3_27_40 K27me32	0	0	0	0.125155	0.134205	0.135511	0.255208	0.257669	0.253915	0.406134	0.406375	0.400193	0.551682	0.533501	0.520297	0.568498	0.513664	0.503261	0.591649	0.567626	0.553488
H3_27_40 K27me33	0	0	0	0.297822	0.312373	0.31922	0.49849	0.521508	0.540944	0.504743	0.530114	0.555463	0.455485	0.486493	0.516864	0.524109	0.56513	0.579859	0.527006	0.544339	0.56088
H3_27_40 K27me2K36me11	0	1.60769e-05	0.0003563	0.201672	0.200763	0.198719	0.116249	0.110324	0.101254	0.102482	0.100944	0.0871541	0.129545	0.119809	0.10317	0.0892441	0.0776168	0.0710495	0.0905183	0.0856189	0.0750828
H3_27_40 K27me21K36me11	0	0	0	0.152454	0.154981	0.156452	0.233788	0.230149	0.230776	0.321515	0.314953	0.308026	0.377436	0.369583	0.356393	0.366732	0.351797	0.345987	0.383831	0.381564	0.374446
H3_27_40 K27me22K36me11	0	0	0	0.371678	0.382304	0.398069	0.563538	0.584334	0.599849	0.535554	0.551639	0.577302	0.467728	0.490146	0.524065	0.535924	0.564237	0.577986	0.520323	0.527751	0.546391
H3_27_40 K27me11K36me2	0	0.000150605	0	0.155252	0.152069	0.15171	0.0881769	0.0817227	0.0813082	0.0911845	0.0849135	0.0763303	0.126762	0.114726	0.102354	0.0800054	0.0663839	0.0648688	0.0878889	0.0820872	0.0740313
H3_27_40 K27me11K36me21	0	0	0	0.148629	0.151794	0.150586	0.230168	0.225045	0.217782	0.312275	0.306489	0.293162	0.370955	0.363604	0.34717	0.343019	0.319728	0.315419	0.360682	0.347601	0.338749
H3_27_40 K27me11K36me22	0	0	0	0.424369	0.438736	0.444083	0.595379	0.614777	0.62511	0.554233	0.572284	0.598686	0.47224	0.49691	0.52952	0.576976	0.613888	0.619712	0.551429	0.570312	0.587219
H3_27_40 K27me11K36me1	0.000112016	0.000116103	0.000188467	0.186453	0.182457	0.178232	0.222747	0.211684	0.199448	0.293736	0.298229	0.276268	0.362801	0.354031	0.327801	0.286257	0.261652	0.254928	0.313947	0.292199	0.283582
H3_27_40 K27me11K36me11	0	0	0	0.70097	0.713085	0.721255	0.74278	0.755797	0.775886	0.669592	0.664528	0.698099	0.565491	0.592483	0.630073	0.690066	0.713964	0.72853	0.653724	0.681168	0.691996
H3_27_40 K27me3K36me11	0.000591709	0.000254448	0	0.362059	0.405411	0.392305	0.260411	0.234535	0.224139	0.165048	0.141852	0.13561	0.108478	0.0983673	0.0861202	0.0559346	0.0445086	0.0437332	0.0339024	0.0315668	0.0273705
H3_27_40 K27me31K36me11	0	0	0	0.198609	0.193722	0.18804	0.161419	0.162081	0.150417	0.161274	0.150133	0.132125	0.173865	0.162707	0.141893	0.147944	0.12821	0.119308	0.136285	0.132247	0.11289
H3_27_40 K27me32K36me11	0	0	0	0.0786055	0.0898276	0.0828522	0.181626	0.184297	0.185227	0.265415	0.262432	0.262385	0.327128	0.327231	0.330138	0.368124	0.362613	0.353096	0.38786	0.378212	0.37228
H3_27_40 K27me33K36me11	0	0	0	0.167062	0.192766	0.191178	0.36801	0.400095	0.41146	0.405129	0.439317	0.469661	0.385961	0.411545	0.441122	0.427997	0.464668	0.483862	0.441953	0.457974	0.487459
H3_27_40 K27me11K36me3	0.000429249	0.000179242	0.000883778	0.375924	0.37738	0.365683	0.176587	0.162878	0.176282	0.117433	0.0821686	0.0942103	0.0943748	0.0725743	0.118987	0.0610378	0.0235752	0.0375246	0.0351703	0.0387567	0.0187584
H3_27_40 K27me11K36me31	0	0	0	0.186627	0.190449	0.188766	0.140913	0.135708	0.129869	0.129867	0.121037	0.112737	0.15423	0.140404	0.120063	0.124561	0.11211	0.0971913	0.120259	0.111874	0.10061
H3_27_40 K27me11K36me32	0	0	0	0.115762	0.130361	0.11799	0.222082	0.224803	0.208433	0.288972	0.294274	0.285469	0.343115	0.337779	0.314715	0.353604	0.355414	0.349214	0.373478	0.361919	0.37063
H3_27_40 K27me11K36me33	0	0	0	0.239767	0.258079	0.260104	0.457607	0.475141	0.483728	0.463727	0.502022	0.507584	0.406588	0.449243	0.446234	0.460797	0.508901	0.51607	0.471092	0.48745	0.510002
H3_27_40 K27me21K36me2	0.000149998	0.000190244	0.000170638	0.180099	0.177708	0.180859	0.126647	0.123039	0.122646	0.0894304	0.083501	0.0770216	0.0734673	0.0648466	0.0586475	0.0398215	0.0349972	0.0302367	0.0289602	0.027168	0.0237316
H3_27_40 K27me22K36me2	0	0	0	0.0935011	0.0947234	0.0961597	0.097051	0.0934414	0.0913915	0.110634	0.104553	0.0978948	0.145874	0.134374	0.123079	0.133674	0.118969	0.110168	0.132706	0.124334	0.115346
H3_27_40 K27me22K36me21	0	0	0	0.0755897	0.0776025	0.0770057	0.173045	0.174463	0.172668	0.253633	0.257177	0.256722	0.323912	0.316483	0.316899	0.363186	0.354363	0.347921	0.379247	0.375341	0.367766
H3_27_40 K27me22K36me22	0	0	0	0.166864	0.174259	0.180077	0.369527	0.387821	0.39574	0.414645	0.435415	0.456483	0.381033	0.415516	0.438242	0.435295	0.465027	0.48862	0.446141	0.459052	0.482409
H3_27_40 K27me3K36me21	0	0	0	0.253707	0.24966	0.255041	0.185968	0.170119	0.16925	0.13261	0.11092	0.0961864	0.0727236	0.0680864	0.0567909	0.0213414	0.0197827	0.00836755	0.00406496	0.00274494	0.00355058
H3_27_40 K27me3K36me22	0	0	0	0.119608	0.122602	0.121125	0.144572	0.143532	0.144901	0.131973	0.123191	0.119545	0.118224	0.110617	0.102067	0.0826005	0.0748337	0.0654215	0.0596794	0.0586177	0.0514376
H3_27_40 K27me33K36me2	0	0	0	0.0509399	0.0535489	0.0543425	0.0925643	0.0936738	0.0932216	0.124282	0.120075	0.119409	0.163518	0.154942	0.147237	0.185638	0.164835	0.158205	0.17793	0.173682	0.158647
H3_27_40 K27me33K36me21	0	0	0	0.0343838	0.0342719	0.0330556	0.122128	0.128238	0.126718	0.197888	0.213864	0.217623	0.278825	0.278866	0.288817	0.354645	0.350647	0.35052	0.38	0.363395	0.36781
H3_27_40 K27me33K36me22	0	0	0	0.0605085	0.0627665	0.0656389	0.207891	0.227171	0.237988	0.276643	0.307919	0.335943	0.303071	0.328881	0.359889	0.355775	0.389902	0.417486	0.378325	0.40156	0.418555
KSAPSTGGVKKPHR(H33_27_40)
H33_27_40 K36me1
H33_27_40 K27me1	1	1	1	0.104621	0.120191	0.0908195	0.0440269	0.0494548	0.0228985	0.173062	0.0982928	0.103404	0.257498	0.165276	0.145285	0.101727	0.105251	0.0868692	0.0966303	0.136689	0.0970294
H33_27_40 K27me2	1	1	0.998502	0.183033	0.16366	0.145618	0.0536249	0.0468929	0.038964	0.0415828	0.0377021	0.0246503	0.0574309	0.0500574	0.0406348	0.0179591	0.0204952	0.0120822	0.0287648	0.0214562	0.0119176
H33_27_40 K36me2	0.999847	0.999661	0.999525	0.15239	0.160839	0.138632	0.0226318	0.0167841	0.0176677	0.0592671	0.0301026	0.0182469	0.0553853	0.0483002	0.0313396	0.014032	0.0163325	0.0139978	0.019036	0.0206429	0.01286
H33_27_40 K27me3	1	1	1	0.351894	0.369225	0.346698	0.329612	0.280747	0.27878	0.19252	0.25028	0.178961	0.237184	0.148888	0.180687	0.160413	0.162086	0.101851	0.0776777	0.0254527	0.101063
H33_27_40 K36me3
H33_27_40 K27me2K36me1	0.999912	1	0.999119	0.191318	0.203259	0.144811	0.0470419	0.0398083	0.0305593	0.00277173	0.0239659	0.00702008	0.0184902	0.00197032	0.0038687	0.000768281	0.00303091	0.00218507	0.000688972	0.00139699	0.000538266
H33_27_40 K27me1K36me2	1	0.999882	0.999915	0.25813	0.241973	0.245894	0.0822533	0.0643457	0.0649212	0.0361165	0.0271187	0.0244669	0.0227091	0.0224151	0.0153023	0	0	0	0	0	0
H33_27_40 K27me1K36me1	1	0.999144	1	0.000859672	0.0159167	0	0.0255853	0	0	0.0792552	0.0441031	0	0	0	0.0232639	0.0346841	0.00778231	0	0	0	0
H33_27_40 K27me3K36me1	0.999549	0.999282	1	0.324698	0.318347	0.288961	0.088228	0.0861152	0.0273208	0.0118856	0.0204296	0	0.0175139	0	0.00879647	0	0	0	0	0	0
H33_27_40 K27me1K36me3	1	1	1	0.189836	0.14976	0.176084	0.0268313	0.00418366	0.00249049	0	0	0	0	0	0	0	0	0	0	0	0
H33_27_40 K27me2K36me2	0.999755	0.999846	0.999871	0.262374	0.244461	0.215199	0.00266642	0.00567213	0.00430091	0.000106424	0	0	0	0	0	0	0	0	0	0	0
H33_27_40 K27me3K36me2	1	1	0.999329	0.427247	0.429361	0.43655	0.175607	0.156808	0.161788	0.0435519	0.0527098	0.0309847	0	0.000713767	0	0	0	0	0	0	0
H33_27_40 K27me11	0	0	0	0.895379	0.879809	0.90918	0.955973	0.950545	0.977101	0.826938	0.901707	0.896596	0.742502	0.834724	0.854715	0.898273	0.894749	0.913131	0.90337	0.863311	0.902971
H33_27_40 K27me21	0	0	0.00149797	0.148946	0.149659	0.139806	0.211768	0.196121	0.192354	0.296038	0.285955	0.259919	0.354138	0.335818	0.325297	0.286433	0.244873	0.246456	0.300198	0.278563	0.267583
H33_27_40 K27me22	0	0	0	0.668021	0.686681	0.714575	0.734607	0.756986	0.768682	0.662379	0.676342	0.715431	0.588431	0.614125	0.634068	0.695607	0.734632	0.741462	0.671037	0.699981	0.720499
H33_27_40 K36me21	0.000152542	0.000338803	0.00047527	0.149087	0.119113	0.128294	0.178706	0.171987	0.128171	0.283085	0.28317	0.252428	0.351462	0.366418	0.311082	0.267586	0.236919	0.224726	0.289378	0.271309	0.257661
H33_27_40 K36me22	0	0	0	0.698523	0.720048	0.733074	0.798662	0.811229	0.854162	0.657648	0.686728	0.729325	0.593153	0.585282	0.657579	0.718382	0.746749	0.761276	0.691586	0.708048	0.729479
H33_27_40 K27me31	0	0	0	0.192828	0.185588	0.174685	0.103631	0.102326	0.0825043	0.122338	0.0972959	0.110794	0.122817	0.118714	0.107803	0.0880758	0.0667361	0.0643809	0.0864093	0.0916678	0.0816887
H33_27_40 K27me32	0	0	0	0.111887	0.107358	0.108239	0.171899	0.186639	0.237137	0.268462	0.251476	0.266536	0.296244	0.340226	0.316191	0.301887	0.302664	0.342037	0.347123	0.405328	0.335696
H33_27_40 K27me33	0	0	0	0.343391	0.33783	0.370378	0.394858	0.430288	0.401579	0.41668	0.400948	0.443709	0.343756	0.392172	0.395318	0.449625	0.468514	0.491731	0.48879	0.477552	0.481552
H33_27_40 K27me2K36me11	8.75962e-05	0	0.000881314	0.176104	0.167088	0.175642	0.0903683	0.0724658	0.0793168	0.0827298	0.069588	0.0602111	0.126358	0.106451	0.0909271	0.0613676	0.0607201	0.05119	0.0697661	0.0650231	0.0650764
H33_27_40 K27me21K36me11	0	0	0	0.156951	0.144757	0.158711	0.222066	0.237443	0.208235	0.321432	0.316559	0.298224	0.385759	0.370412	0.363705	0.352797	0.317332	0.307094	0.354104	0.334032	0.335319
H33_27_40 K27me22K36me11	0	0	0	0.475627	0.484896	0.520836	0.640524	0.650283	0.681889	0.593067	0.589888	0.634545	0.469393	0.521167	0.5415	0.585067	0.618917	0.639531	0.575441	0.599548	0.599067
H33_27_40 K27me11K36me2	0	0.000117955	8.5342e-05	0.145505	0.159962	0.137861	0.0934236	0.0861025	0.102096	0.0873781	0.0810774	0.0638546	0.125681	0.111899	0.0857454	0.0659594	0.0564277	0.051977	0.0754997	0.0677189	0.0460359
H33_27_40 K27me11K36me21	0	0	0	0.154794	0.154072	0.151042	0.235941	0.238179	0.210765	0.329513	0.311711	0.305809	0.380525	0.376919	0.358983	0.349584	0.308421	0.315392	0.360681	0.348599	0.348287
H33_27_40 K27me11K36me22	0	0	0	0.441571	0.443993	0.465203	0.588382	0.611372	0.622218	0.546993	0.580093	0.60587	0.471085	0.488767	0.53997	0.584456	0.635151	0.632631	0.563819	0.583682	0.605677
H33_27_40 K27me11K36me1	0	0	0	0.132309	0.149062	0	0.104791	0.157453	0.0101815	0.184847	0.221764	0.166729	0.320093	0.281034	0.19747	0.18905	0.21583	0.201276	0.23757	0.253834	0.17682
H33_27_40 K27me11K36me11	0	0.000855563	0	0.866831	0.835022	0	0.869623	0.842547	0.989819	0.735898	0.734133	0.833271	0.679907	0.718966	0.779266	0.776266	0.776388	0.798724	0.76243	0.746166	0.82318
H33_27_40 K27me3K36me11	0.000450932	0	0	0.326676	0.317529	0.291284	0.192374	0.195075	0.0991744	0.0950214	0.106087	0.00354027	0.0956196	0.0159297	0.0334148	0.000275885	0.032427	0.014588	0.0379388	0.029582	0
H33_27_40 K27me31K36me11	0	0.000717772	0	0.10194	0.0732779	0.234621	0.135356	0.0719161	0.486633	0.0736886	0.108395	0.409905	0.173252	0.169761	0.401068	0.200167	0.107207	0.0920511	0.137553	0.111661	0.256629
H33_27_40 K27me32K36me11	0	0	0	0.0331636	0.0582877	0	0.177205	0.17273	0.0783098	0.304039	0.295043	0.163133	0.332226	0.350439	0.221578	0.343433	0.356272	0.363112	0.371926	0.36485	0.267933
H33_27_40 K27me33K36me11	0	0	0	0.213523	0.232558	0.185133	0.406837	0.474164	0.308562	0.515366	0.470045	0.423422	0.381388	0.463871	0.335142	0.456124	0.504093	0.530249	0.452582	0.493908	0.475438
H33_27_40 K27me11K36me3	0	0	0	0.34598	0.327697	0.403319	0.177223	0.159716	0.158196	0.103706	0.0888499	0.0780122	0.0663895	0.0592401	0.0368518	0.0239225	0.0353707	0.0317426	0.0244936	0.0239992	0.0222802
H33_27_40 K27me11K36me31	0	0	0	0.169018	0.177859	0.203756	0.130544	0.133424	0.129029	0.132075	0.114683	0.106988	0.144966	0.135883	0.117543	0.101222	0.0939288	0.0836392	0.106534	0.0917255	0.0912856
H33_27_40 K27me11K36me32	0	0	0	0.1122	0.119099	0.135111	0.232716	0.24374	0.225468	0.292154	0.312456	0.291316	0.36745	0.353737	0.350977	0.385609	0.357719	0.337939	0.391171	0.380785	0.360938
H33_27_40 K27me11K36me33	0	0	0	0.182966	0.225584	0.0817312	0.432686	0.458935	0.484816	0.472066	0.484011	0.523683	0.421194	0.45114	0.494628	0.489246	0.512982	0.546679	0.477801	0.50349	0.525496
H33_27_40 K27me21K36me2	0.000244542	0.000153726	0.000129074	0.0644517	0.0798522	0.144503	0.155643	0.179969	0.0879756	0.00620363	0.0193621	0.0585963	0.0469693	0.0315606	0.0534115	0.022649	0.0134789	0.0146124	0.00565468	0.00486136	0.00478277
H33_27_40 K27me22K36me2	0	0	0	0.028276	0.0425993	0.0533086	0.0235029	0.0116781	0.0234973	0.043028	0.0260989	0.0573839	0.15091	0.131714	0.114887	0.11749	0.092611	0.0854682	0.120509	0.102472	0.0903238
H33_27_40 K27me22K36me21	0	0	0	0.0909441	0.14421	0.0808759	0.245551	0.238808	0.240695	0.376727	0.349495	0.313351	0.359958	0.358678	0.342205	0.360208	0.341577	0.336005	0.446983	0.371742	0.45652
H33_27_40 K27me22K36me22	0	0	0	0.553954	0.488877	0.506114	0.572637	0.563872	0.643531	0.573935	0.605044	0.570669	0.442163	0.478047	0.489497	0.499653	0.552333	0.563914	0.426853	0.520925	0.448373
H33_27_40 K27me3K36me21	0	0	0.000670776	0.273617	0.279661	0.299413	0.143072	0.134704	0.12237	0.0511083	0.0368216	0.0233857	0.0143441	0.00371072	0.00802747	0	4.78317e-05	0	0	0	0
H33_27_40 K27me3K36me22	0	0	0	0.141734	0.14318	0.13284	0.168895	0.169151	0.154348	0.143565	0.135916	0.115886	0.119512	0.0993512	0.0837952	0.0576371	0.0634663	0.0475871	0.0432935	0.0315814	0.0272568
H33_27_40 K27me33K36me2	0	0	0	0.0348604	0.0403285	0.0204637	0.0871847	0.0904533	0.0800225	0.136214	0.132042	0.122214	0.175694	0.173543	0.146987	0.174952	0.146599	0.13641	0.169089	0.140347	0.147091
H33_27_40 K27me33K36me21	0	0	0	0.0297242	0.0183907	0.0144313	0.143315	0.154041	0.156503	0.251044	0.264638	0.272566	0.336141	0.323475	0.331898	0.382344	0.371121	0.363372	0.391695	0.405263	0.38943
H33_27_40 K27me33K36me22	0	0	0	0.0928178	0.0890778	0.0963024	0.281927	0.294843	0.324968	0.374517	0.377873	0.434963	0.354308	0.399206	0.429293	0.385067	0.418765	0.45263	0.395922	0.422808	0.436223
YQKSTELLIR(H3_54_63)
H3_54_63 K56me1	0.0910922	0	0	0	0.960184	0	0	0	0.962876	0.0310047	0	0.855998	0.351796	0.668162	0.882915	0.025605	0.723291	0	0.34691	0.938304	0.131518
H3_54_63 K56me2	0.99923	0.959921	1	0.0292953	0.0177744	0.034888	0.000663208	0.00515207	0.010672	0.00297658	0.000417135	0.0077523	0.00562545	0.00134496	0.00515049	0.00565332	0.0121673	0.00816042	0.00635725	0.0196652	0.0459771
H3_54_63 K56me3	0	0	0	0	0	0	0	0	0	0	0	0	0	0	0	0	0	0	0	0	0
H3_54_63 K56me11	0.908908	1	0	1	0.0398155	1	1	1	0.0371236	0.968995	1	0.144002	0.648204	0.331838	0.117085	0.974395	0.276709	1	0.65309	0.0616957	0.868482
H3_54_63 K56me21	0.000770473	0.0400791	0	0.970416	0.982226	0.965112	0.998532	0.994394	0.981235	0.997023	0.99905	0.992108	0.994351	0.998513	0.994232	0.989991	0.987833	0.99184	0.99327	0.979917	0.954023
H3_54_63 K56me22	0	0	0	0.000288839	0	0	0.000805102	0.000453849	0.00809278	0	0.00053305	0.000140128	2.39285e-05	0.000142306	0.000617981	0.00435592	0	0	0.000372526	0.000417634	0
H3_54_63 K56me31	1	1	0	0	0	0	0	0	0	0	0	0.496365	0	1	1	1	0	0	0.330191	1	0.761497
H3_54_63 K56me32	0	0	0	1	1	1	1	0	1	0	0	0.503635	0	0	0	0	0	1	0.545234	0	0
H3_54_63 K56me33	0	0	0	0	0	0	0	0	0	0	0	0	0	0	0	0	0	0	0.124575	0	0.238503
EIAQDFKTDLR(H3_73_83)
H3_73_83 K79me1	0.99951	0.999545	1	0.538257	0.525165	0.512382	0.330754	0.311192	0.29026	0.272532	0.254208	0.244397	0.263315	0.256969	0.224664	0.200794	0.176416	0.167228	0.19072	0.183571	0.16056
H3_73_83 K79me2	0.965689	0.90389	0.941001	0.581715	0.545771	0.581184	0.322183	0.33301	0.423204	0.204129	0.034838	0.159881	0.150565	0.127277	0.0856207	0.0275433	0.0174034	0.0570792	0.0488381	0.0491616	0.0444602
H3_73_83 K79me3	0.997862	0.642598	0.43289	0.0925954	0.0991422	0.393398	0	0.00390237	1.35018e-05	0	0	0	0	0	0	0	0	0	0	0	0.00743985
H3_73_83 K79me11	0.000490169	0.000454577	0	0.461743	0.474835	0.487618	0.669246	0.688808	0.70974	0.727468	0.745792	0.755603	0.736685	0.743031	0.775336	0.799206	0.823584	0.832772	0.80928	0.816429	0.83944
H3_73_83 K79me21	0	0	0	0.26345	0.276485	0.256027	0.247333	0.230289	0.0977113	0.319715	0.250735	0.311112	0.346718	0.327305	0.313522	0.310154	0.335457	0.28732	0.273241	0.298781	0.310615
H3_73_83 K79me22	0.0343106	0.0961095	0.0589992	0.154835	0.177744	0.162789	0.430484	0.436701	0.479085	0.476156	0.714427	0.529007	0.502718	0.545418	0.600857	0.662303	0.647139	0.655601	0.677921	0.652057	0.644925
H3_73_83 K79me31	0	0	0	0	0	0	0	0	0.00065477	0.000638531	0	0.00208189	0.557881	0.00810195	0.000563404	0.0040102	0.143791	0.000127502	0.787958	0.144699	0.70475
H3_73_83 K79me32	0	0.355688	0.566321	0.501292	0.450508	0.295045	0.000267849	0	0.000129707	0.000379736	0.0249768	0.00262058	0.146655	0.00206242	0.000358278	0.000462493	0.0109191	0.00125298	0.00769864	0.0928364	0.0181718
H3_73_83 K79me33	0.00213848	0.001714	0.000789686	0.406113	0.45035	0.311558	0.999732	0.996098	0.999202	0.998982	0.975023	0.995298	0.295464	0.989836	0.999078	0.995527	0.84529	0.99862	0.204343	0.762465	0.269638
VTIMPKDIQLAR(H3_117_128)
H3_117_128 unmod	0.999954	0.99996	0.999979	0.559308	0.550028	0.45352	0.255565	0.355876	0.33961	0.257068	0.282644	0.182327	0.203031	0.279256	0.259753	0.224942	0.212811	0.202139	0.162217	0.215487	0.177217
H3_117_128 M120cd3	4.56821e-05	4.04526e-05	2.05261e-05	0.440692	0.449972	0.54648	0.744435	0.644124	0.66039	0.742932	0.717356	0.817673	0.796969	0.720744	0.740247	0.775058	0.787189	0.797861	0.837783	0.784513	0.822783
KVLR(H4_20_23)
H4_20_23 K20me1	1	1	1	0.190668	0.183541	0.182604	0.143806	0.136046	0.125558	0.19858	0.191572	0.170479	0.243843	0.227766	0.204799	0.159996	0.140013	0.13832	0.176507	0.169056	0.162907
H4_20_23 K20me2	1	1	1	0.0695347	0.0700815	0.0660009	0.0302545	0.0256426	0.0230956	0.0159441	0.0128984	0.0115079	0.0109238	0.00892734	0.00866236	0.00463621	0.00455065	0.00366485	0.00402745	0.00400691	0.00315607
H4_20_23 K20me3	1	1	1	0.537374	0.522726	0.522832	0.291221	0.282934	0.279912	0.173307	0.167615	0.155903	0.111334	0.105377	0.0965723	0.0502099	0.045533	0.0405038	0.0283101	0.0289744	0.0236353
H4_20_23 K20me11	0	0	0	0.809332	0.816459	0.817396	0.856194	0.863954	0.874442	0.80142	0.808428	0.829521	0.756157	0.772234	0.795201	0.840004	0.859987	0.86168	0.823493	0.830944	0.837093
H4_20_23 K20me21	0	0	0	0.286905	0.277432	0.273871	0.228776	0.21967	0.208826	0.264346	0.250529	0.236088	0.308172	0.297162	0.276638	0.27484	0.252834	0.244473	0.280917	0.271055	0.258843
H4_20_23 K20me22	0	0	0	0.643561	0.652486	0.660128	0.740969	0.754687	0.768078	0.71971	0.736572	0.752404	0.680905	0.69391	0.714699	0.720524	0.742616	0.751862	0.715055	0.724938	0.738001
H4_20_23 K20me31	0	0	0	0.279327	0.282921	0.282105	0.275795	0.272137	0.272077	0.230061	0.224102	0.215437	0.202974	0.194986	0.184588	0.148835	0.136776	0.124395	0.119728	0.119473	0.102596
H4_20_23 K20me32	0	0	0	0.0546578	0.0560811	0.0547988	0.125718	0.12774	0.124566	0.207085	0.205935	0.207738	0.284448	0.277355	0.270601	0.323935	0.312867	0.309398	0.342593	0.335985	0.322011
H4_20_23 K20me33	0	0	0	0.128641	0.138272	0.140265	0.307266	0.31719	0.323445	0.389547	0.402348	0.420922	0.401244	0.422283	0.448239	0.47702	0.504824	0.525703	0.509368	0.515568	0.551758
KTVTAMDVVYALKR(H4_79_92)
H4_79_92 unmod	0.999867	0.999943	0.999895	0.554372	0.552741	0.539917	0.362669	0.347986	0.229228	0.287412	0.28594	0.196309	0.282237	0.266639	0.247189	0.217448	0.197297	0.192765	0.199971	0.200992	0.18979
H4_79_92 M84cd3	0.000132908	5.74239e-05	0.000104632	0.445628	0.447259	0.460083	0.637331	0.652014	0.770772	0.712588	0.71406	0.803691	0.717763	0.733361	0.752811	0.782552	0.802703	0.807235	0.800029	0.799008	0.81021
