# Supplementary material for: Multi-omic profiling of histone variant H3.3 lysine 27 methylation reveals a distinct role from canonical H3 in stem cell differentiation
Source: Royal Society of Chemistry journal article supplement (doi:10.1039/d1mo00352f), 2022-01-12
Supplement: d1mo00352f4.xlsx [file d1mo00352f4.xlsx]

## Sheet: pluripotency
	undiff_unlabelctrl_B1	undiff_unlabelctrl_B2	unlabelctrl_B3	undiff_0_5_B1	undiff_0_5_B2	undiff_0_5_B3	undiff_1_B1	undiff_1_B2	undiff_1_B3	undiff_1_5_B1	undiff_1_5_B2	undiff_1_5_B3	undiff_2_B1	undiff_2_B2	undiff_2_B3	undiff_3_B1	undiff_3_B2	undiff_3_B3	undiff_4_B1	undiff_4_B2	undiff_4_B3
Peptide	Ratio	Ratio	Ratio	Ratio	Ratio	Ratio	Ratio	Ratio	Ratio	Ratio	Ratio	Ratio	Ratio	Ratio	Ratio	Ratio	Ratio	Ratio	Ratio	Ratio	Ratio
H3K4un
LightR	1	1	1	0.49873	0.494491	0.493947	0.22491	0.218882	0.217819	0.096755	0.09356	0.091879	0.048067	0.046929	0.048394	0.012644	0.01211	0.012381	0.007178	0.008476	0.008275
HeavyR	0	0	0	0.50127	0.505509	0.506053	0.77509	0.781118	0.782181	0.903245	0.90644	0.908121	0.951933	0.953071	0.951606	0.987356	0.98789	0.987619	0.992822	0.991524	0.991725
H3K4me1
LightR	1	1	1	0.571914	0.573533	0.572292	0.254091	0.251155	0.249246	0.110271	0.10409	0.106604	0.051032	0.05095	0.051976	0.011331	0.010948	0.011259	0.00566	0.00557	0.005484
HeavyR	0	0	0	0.428086	0.426467	0.427708	0.745909	0.748845	0.750754	0.889729	0.89591	0.893396	0.948968	0.94905	0.948024	0.988669	0.989052	0.988741	0.99434	0.99443	0.994516
H3K4me2
LightR	1	1	1	0.396493	0.388619	0.38963	0.154128	0.149209	0.151955	0.06071	0.057017	0.059289	0.029848	0.029763	0.030387	0.00715287	0.006191	0.00708336	0.00647815	0.006267	0.00707109
HeavyR	0	0	0	0.603507	0.611381	0.61037	0.845872	0.850791	0.848045	0.93929	0.942983	0.940711	0.970152	0.970237	0.969613	0.992847	0.993809	0.992917	0.993522	0.993733	0.992929
H3K4me3
LightR	0.99026	0.999482	0.999219	0.357671	0.353972	0.347856	0.12082	0.116381	0.116718	0.044931	0.042637	0.03882	0.0218	0.020811	0.017191	0	0.00372445	0.00469611	0.00314379	0.0031137	0
HeavyR	0.00974	0.000518	0.000781	0.642329	0.646028	0.652144	0.87918	0.883619	0.883282	0.955069	0.957363	0.96118	0.9782	0.979189	0.982809	1	0.996276	0.995304	0.996856	0.99845	1
H3K4ac
LightR	0.997798	1	1	0.449894	0.506101	0.396363	0.057424	0.037573	0.111696	0	0	0.005125	0	0	0	0	0	0	0	0	0
HeavyR	0.002202	0	0	0.550106	0.493899	0.603637	0.942576	0.962427	0.888304	1	1	0.994875	1	1	1	1	1	1	1	1	1
H3K9K14un
LightR	1	1	1	0.362808	0.364373	0.360702	0.156463	0.154016	0.146845	0.064549	0.063193	0.062419	0.034978	0.037172	0.036799	0.00935	0.008601	0.008699	0.006766	0.007712	0.007454
HeavyR	0	0	0	0.637192	0.635627	0.639298	0.843537	0.845984	0.853155	0.935451	0.936807	0.937581	0.965022	0.962828	0.963201	0.99065	0.991399	0.991301	0.993234	0.992288	0.992546
H3K9me1
LightR	1	1	1	0.456581	0.460468	0.452133	0.188798	0.186308	0.182758	0.077871	0.076674	0.075611	0.038066	0.0384	0.039818	0.009195	0.008695	0.008131	0.006038	0.006752	0.006305
HeavyR	0	0	0	0.543419	0.539532	0.547867	0.811202	0.813692	0.817242	0.922129	0.923326	0.924389	0.961934	0.9616	0.960182	0.990805	0.991305	0.991869	0.993962	0.993248	0.993695
H3K9me2
LightR	1	1	1	0.601485	0.600473	0.601478	0.271612	0.263987	0.267238	0.112716	0.109764	0.111266	0.052989	0.052499	0.054793	0.013726	0.012806	0.013036	0.007015	0.007901	0.007564
HeavyR	0	0	0	0.398515	0.399527	0.398522	0.728388	0.736013	0.732762	0.887284	0.890236	0.888734	0.947011	0.947501	0.945207	0.986274	0.987194	0.986964	0.992985	0.992099	0.992436
H3K9me3
LightR	1	1	1	0.702442	0.700747	0.697951	0.364587	0.360874	0.35695	0.168829	0.157631	0.16009	0.078761	0.068962	0.078138	0.017334	0.014846	0.016753	0.005749	0.005522	0.006159
HeavyR	0	0	0	0.297558	0.299253	0.302049	0.635413	0.639126	0.64305	0.831171	0.842369	0.83991	0.921239	0.931038	0.921862	0.982666	0.985154	0.983247	0.994251	0.994478	0.993841
H3K9ac|K14ac
K9acLightR	0.038701	0.036743	0.038386	0.056564	0.034638	0.047844	0.02694	0.027282	0.022574	0.011887	0.012155	0.010945	0.00699	0.00602	0.006519	0.001555	0.001375	0.001255	0.001088	0.00124	0.000703
K14acLightR	0.961299	0.963257	0.961614	0.219488	0.250121	0.230804	0.085985	0.087096	0.090037	0.034857	0.034791	0.036538	0.020408	0.020655	0.022061	0.00463	0.005706	0.005236	0.004543	0.005499	0.006677
K9acHeavyR	0	0	0	0.07128	0.040818	0.044954	0.048888	0.048071	0.073585	0.044727	0.08902	0.041535	0.050095	0.082128	0.085384	0.041739	0.069636	0.071782	0.05994	0.070594	0.036327
K14acHeavyR	0	0	0	0.652669	0.674423	0.676398	0.838187	0.837551	0.813804	0.908529	0.864034	0.910982	0.922508	0.891197	0.886036	0.952076	0.923283	0.921727	0.93443	0.922666	0.956293
H3K9me1K14ac
LightR	1	1	1	0.372217	0.373657	0.376848	0.148403	0.152159	0.147736	0.063932	0.062786	0.061813	0.034489	0.033734	0.035116	0.009996	0.012335	0.011816	0.008284	0.009698	0.011008
HeavyR	0	0	0	0.627783	0.626343	0.623152	0.851597	0.847841	0.852264	0.936068	0.937214	0.938187	0.965511	0.966266	0.964884	0.990004	0.987665	0.988184	0.991716	0.990302	0.988992
H3K9me2K14ac
LightR	1	1	1	0.523617	0.522962	0.52521	0.215501	0.21302	0.213824	0.084496	0.080489	0.08454	0.039884	0.038526	0.040918	0.009459	0.009929	0.010876	0.006252	0.007247	0.007156
HeavyR	0	0	0	0.476383	0.477038	0.47479	0.784499	0.78698	0.786176	0.915504	0.919511	0.91546	0.960116	0.961474	0.959082	0.990541	0.990071	0.989124	0.993748	0.992753	0.992844
H3K9me3K14ac
LightR	1	1	1	0.655314	0.654151	0.651497	0.344931	0.3398	0.334636	0.16192	0.156629	0.157763	0.079048	0.076275	0.080291	0.018901	0.017762	0.018717	0.007985	0.008273	0.008274
HeavyR	0	0	0	0.344686	0.345849	0.348503	0.655069	0.6602	0.665364	0.83808	0.843371	0.842237	0.920952	0.923725	0.919709	0.981099	0.982238	0.981283	0.992015	0.991727	0.991726
H3K9acK14ac
LightR	1	1	1	0.344835	0.374854	0.357204	0.14364	0.139412	0.134445	0.048531	0.037904	0.04924	0.001539	0.023601	0.024385	0	0	0	0	1	0
HeavyR	0	0	0	0.655165	0.625146	0.642796	0.85636	0.860588	0.865555	0.951469	0.962096	0.95076	0.998461	0.976399	0.975615	0	0	0	0	0	0
H3K18K23un
LightR	1	1	1	0.54203	0.540797	0.542837	0.250072	0.243469	0.242381	0.105152	0.101791	0.102106	0.051552	0.050342	0.05265	0.01231	0.012322	0.012201	0.006514	0.007804	0.007633
HeavyR	0	0	0	0.45797	0.459203	0.457163	0.749928	0.756531	0.757619	0.894848	0.898209	0.897894	0.948448	0.949658	0.94735	0.98769	0.987678	0.987799	0.993486	0.992196	0.992367
H3K18me1|K23me1
LightR	1	1	1	0.903794	0.862089	0.900519	0.557308	0.474168	0.198328	0.267213	0.290791	0.201755	0.039529	0.045275	0.043041	0.917308	0.002449	0.007516	0.003305	0.002966	1
HeavyR	0	0	0	0.096206	0.137911	0.099481	0.442692	0.525832	0.801672	0.732787	0.709209	0.798245	0.960471	0.954725	0.956959	0.082692	0.997551	0.992484	0.996695	0.997034	0
H3K18me1K23me1
LightR	1	0.993376	1	0.722951	0.839506	0.597664	0.431014	0.258216	0.213738	0.08132	0.07004	0.07568	0.025646	0	0.026435	0	0	0	1	0	0.003423
HeavyR	0	0.006624	0	0.277049	0.160494	0.402336	0.568986	0.741784	0.786262	0.91868	0.92996	0.92432	0.974354	0	0.973565	0	0	0	0	0	0.996577
H3K18ac|K23ac
K18acLightR	0.167401	0.153604	0.163567	0.0722	0.072743	0.068696	0.030679	0.032302	0.030367	0.013398	0.011805	0.011182	0.006635	0.004423	0.005876	0.001472	0.001712	0.001574	0.00107	0.00106	0.001094
K23acLightR	0.832599	0.846396	0.836433	0.336861	0.335888	0.335155	0.136134	0.130278	0.129512	0.055849	0.05488	0.056122	0.029983	0.031313	0.030703	0.007951	0.007449	0.007878	0.005637	0.00662	0.006475
K18acHeavyR	0	0	0	0.092459	0.093374	0.088919	0.138411	0.149321	0.144454	0.16271	0.15091	0.139357	0.1656	0.117121	0.147675	0.145169	0.174885	0.171584	0.167075	0.145168	0.155935
K23acHeavyR	0	0	0	0.49848	0.497995	0.50723	0.694775	0.6881	0.695667	0.768042	0.782405	0.793339	0.797781	0.847143	0.815745	0.845408	0.815954	0.818964	0.826217	0.847151	0.836496
H3K18acK23ac
LightR	1	1	1	0.352048	0.343743	0.338111	0.089966	0.140456	0.136519	0.019068	0.07616	0.066289	0.012527	0.03435	0.040025	0.015228	0.026179	0.034484	0.026892	0.030962	0.026806
HeavyR	0	0	0	0.647952	0.656257	0.661889	0.910034	0.859544	0.863481	0.980932	0.92384	0.933711	0.987473	0.96565	0.959975	0.984772	0.973821	0.965516	0.973108	0.969038	0.973194
H3K27K36un
LightR	1	1	0.999998	0.029723	0.026829	0.027741	0.011539	0.011879	0.011233	0.010685	0.012456	0.012437	0.014472	0.015672	0.01645	0.005022	0.005903	0.006001	0.008637	0.010074	0.009118
HeavyR	0	0	2e-06	0.970277	0.973171	0.972259	0.988461	0.988121	0.988767	0.989315	0.987544	0.987563	0.985528	0.984328	0.98355	0.994978	0.994097	0.993999	0.991363	0.989926	0.990882
H3K27me1
LightR	0.999752	0.998978	0.999317	0.076006	0.073533	0.073581	0.018369	0.017773	0.016691	0.010242	0.011601	0.01136	0.012992	0.012575	0.014041	0.0026	0.003831	0.00324	0.006131	0.008027	0.006799
HeavyR	0.000248	0.001022	0.000683	0.923994	0.926467	0.926419	0.981631	0.982227	0.983309	0.989758	0.988399	0.98864	0.987008	0.987425	0.985959	0.9974	0.996169	0.99676	0.993869	0.991973	0.993201
H3K27me2
LightR	0.999792	0.998567	0.998016	0.250654	0.252862	0.254783	0.061311	0.060284	0.062488	0.02136	0.021251	0.02065	0.013334	0.015475	0.015587	0.003568	0.004207	0.004119	0.005348	0.007081	0.006463
HeavyR	0.000208	0.001433	0.001984	0.749346	0.747138	0.745217	0.938689	0.939716	0.937512	0.97864	0.978749	0.97935	0.986666	0.984525	0.984413	0.996432	0.995793	0.995881	0.994652	0.992919	0.993537
H3K36me2
LightR	0.984316	0.983435	0.983282	0.276939	0.277566	0.286377	0.070921	0.072407	0.073867	0.022999	0.021224	0.021267	0.013263	0.013436	0.01504	0.003078	0.004003	0.002622	0.005281	0.006231	0.005498
HeavyR	0.015684	0.016565	0.016718	0.723061	0.722434	0.713623	0.929079	0.927593	0.926133	0.977001	0.978776	0.978733	0.986737	0.986564	0.98496	0.996922	0.995997	0.997378	0.994719	0.993769	0.994502
H3K27me3
LightR	1	0.99964	0.999517	0.555747	0.537387	0.543729	0.23448	0.262765	0.25493	0.128514	0.149725	0.154912	0.116685	0.136827	0.122824	0.101158	0.0895914	0.104878	0.100165	0.0957685	0.129512
HeavyR	0	0.00036	0.000483	0.444253	0.462613	0.456271	0.76552	0.737235	0.74507	0.871486	0.850275	0.845088	0.883315	0.863173	0.877176	0.898842	0.910409	0.895122	0.899835	0.904232	0.870488
H3K27me2K36me1
LightR	1	1	1	0.530071	0.52932	0.531519	0.195746	0.193778	0.193841	0.078443	0.075729	0.073635	0.042506	0.033281	0.034451	0	0	0.001139	0	0	0
HeavyR	0	0	0	0.469929	0.47068	0.468481	0.804254	0.806222	0.806159	0.921557	0.924271	0.926365	0.957494	0.966719	0.965549	0	0	0.998861	0	0	0
H3K27me1K36me2
LightR	1	1	1	0.48462	0.485897	0.487261	0.174722	0.171971	0.172662	0.061233	0.060264	0.05921	0.029302	0.030104	0.030398	0	0	0.008873	0	0	0
HeavyR	0	0	0	0.51538	0.514103	0.512739	0.825278	0.828029	0.827338	0.938767	0.939736	0.94079	0.970698	0.969896	0.969602	0	0	0.991127	0	0	0
H3K27me1K36me1
LightR	1	1	1	0.23075	0.229969	0.232429	0.057051	0.056553	0.05801	0.019548	0.017992	0.018941	0.013677	0.014141	0.014649	0.001678	0.003302	0.002217	0.004171	0.005978	0.005573
HeavyR	0	0	0	0.76925	0.770031	0.767571	0.942949	0.943447	0.94199	0.980452	0.982008	0.981059	0.986323	0.985859	0.985351	0.998322	0.996698	0.997783	0.995829	0.994022	0.994427
H3K27me3K36me1
LightR	1	1	1	0.787212	0.792122	0.784848	0.392523	0.402435	0.393468	0.116267	0.108432	0.124422	0.030835	0.03549	0.025123	0.002954	0.001043	0.0009	0	0	0
HeavyR	0	0	0	0.212788	0.207878	0.215152	0.607477	0.597565	0.606532	0.883733	0.891568	0.875578	0.969165	0.96451	0.974877	0.997046	0.998957	0.9991	0	0	0
H3K27me1K36me3
LightR	1	1	1	0.725872	0.728706	0.722145	0.112991	0.105475	0.14689	0	0	0.002886	0	0	0	0	0	0	0	0	0
HeavyR	0	0	0	0.274128	0.271294	0.277855	0.887009	0.894525	0.85311	0	0	0.997114	0	0	0	0	0	0	0	0	0
H3K27me2K36me2
LightR	1	1	0.999975	0.761188	0.765476	0.761497	0.399691	0.401933	0.394377	0.175774	0.171692	0.168597	0.07941	0.082096	0.082687	0.020608	0.019847	0.022911	0.01035	0.008668	0.009248
HeavyR	0	0	2.5e-05	0.238812	0.234524	0.238503	0.600309	0.598067	0.605623	0.824226	0.828308	0.831403	0.92059	0.917904	0.917313	0.979392	0.980153	0.977089	0.98965	0.991332	0.990752
H3K27me3K36me2
LightR	1	1	1	0.884173	0.889583	0.883983	0.578976	0.588866	0.592014	0.335295	0.310611	0.319829	0.253097	0.119423	0.110004	0	0	0	0	0	0
HeavyR	0	0	0	0.115827	0.110417	0.116017	0.421024	0.411134	0.407986	0.664705	0.689389	0.680171	0.746903	0.880577	0.889996	0	0	0	0	0	0
H3K27ac
LightR	1	1	1	0.014723	0.014542	0.015629	0.004699	0.005517	0.003129	0.004641	0.002107	0.007911	0.004857	0.008141	0.009451	0.000151	0.001868	0.000464	0.004306	0.005288	0.001993
HeavyR	0	0	0	0.985277	0.985458	0.984371	0.995301	0.994483	0.996871	0.995359	0.997893	0.992089	0.995143	0.991859	0.990549	0.999849	0.998132	0.999536	0.995694	0.994712	0.998007
H33K27K36un
LightR	1	1	1	0.027221	0.02732	0.020189	0.0069	0.005222	0.001471	0.00481	0.003228	0.002858	0.006544	0.0049	0.004573	0.001613	0.000162	0	0.002628	0	0
HeavyR	0	0	0	0.972779	0.97268	0.979811	0.9931	0.994778	0.998529	0.99519	0.996772	0.997142	0.993456	0.9951	0.995427	0.998387	0.999838	1	0.997372	1	1
H33K27me1
LightR	0.879056	0.887801	0.891839	0.181646	0.088331	0.204599	0.014525	0.036569	0.006744	0.003869	0.003098	0.00454	0.004734	0	0.000621	0	0	0	0	0	0
HeavyR	0.120944	0.112199	0.108161	0.818354	0.911669	0.795401	0.985475	0.963431	0.993256	0.996131	0.996902	0.99546	0.995266	0	0.999379	0	0	0	0	0	0
H33K27me2
LightR	1	1	0.999191	0.213609	0.172026	0.1959	0.036098	0.030629	0.039455	0.013912	0.01181	0.008693	0.010024	0.011429	0.007954	0.001604	0.001261	0.00114	0.003624	0.001433	0.007692
HeavyR	0	0	0.000809	0.786391	0.827974	0.8041	0.963902	0.969371	0.960545	0.986088	0.98819	0.991307	0.989976	0.988571	0.992046	0.998396	0.998739	0.99886	0.996376	0.998567	0.992308
H33K36me2
LightR	0.999111	0.999289	0.999822	0.25057	0.250186	0.253919	0.023635	0.01232	0.014416	0.004191	0.002799	0.002811	0.002418	0.001226	0.002297	1.9e-05	0	8.8e-05	0.0001	0.000341	0.000403
HeavyR	0.000889	0.000711	0.000178	0.74943	0.749814	0.746081	0.976365	0.98768	0.985584	0.995809	0.997201	0.997189	0.997582	0.998774	0.997703	0.999981	0	0.999912	0.9999	0.999659	0.999597
H33K27me3
LightR	0.98817	1	1	0.46155	0.455942	0.455425	0.210071	0.221013	0.230251	0.141658	0.130572	0.0394458	0.111376	0.106807	0.118792	0.105413	0.0987519	0.100116	0.106298	0.101872	0.111461
HeavyR	0.01183	0	0	0.53845	0.544058	0.544575	0.789929	0.778987	0.769749	0.858342	0.869428	0.960554	0.888624	0.893193	0.881208	0.894587	0.901248	0.899884	0.893702	0.898128	0.888539
H33K27me2K36me1
LightR	1	1	1	0.411631	0.430654	0.442442	0.156049	0.184261	0.143953	0.084471	0.060975	0.077619	0.029392	0.030762	0.032821	0	0	0	0	0	0
HeavyR	0	0	0	0.588369	0.569346	0.557558	0.843951	0.815739	0.856047	0.915529	0.939025	0.922381	0.970608	0.969238	0.967179	0	0	0	0	0	0
H33K27me1K36me2
LightR	1	1	1	0.452055	0.440679	0.428788	0.160451	0.157584	0.140023	0.051722	0.046782	0.050426	0.02376	0.018033	0.019336	0	0	0.002121	0	0	0
HeavyR	0	0	0	0.547945	0.559321	0.571212	0.839549	0.842416	0.859977	0.948278	0.953218	0.949574	0.97624	0.981967	0.980664	0	0	0.997879	0	0	0
H33K27me1K36me1
LightR	1	1	0.998415	0.199555	0.1572	0.176341	0.025046	0.035664	0.006399	0.000302	0	0	0	0	0	0	0	0	0	0	0
HeavyR	0	0	0.001585	0.800445	0.8428	0.823659	0.974954	0.964336	0.993601	0.999698	0	0	0	0	0	0	0	0	0	0	0
H33K27me3K36me1
LightR	1	1	1	0.711248	0.727741	0.696519	0.33079	0.25777	0.301299	0.065581	0.043887	0.048001	0	0.009889	0	0	0	0	0	0	0
HeavyR	0	0	0	0.288752	0.272259	0.303481	0.66921	0.74223	0.698701	0.934419	0.956113	0.951999	0	0.990111	0	0	0	0	0	0	0
H33K27me1K36me3
LightR	1	1	1	0.697995	0.711932	0.682991	0.352031	0.34791	0.287989	0	0	0.012035	0	0	0	0	0	0	0	0	0
HeavyR	0	0	0	0.302005	0.288068	0.317009	0.647969	0.65209	0.712011	0	0	0.987965	0	0	0	0	0	0	0	0	0
H33K27me2K36me2
LightR	1	1	1	0.79132	0.78935	0.784045	0.339898	0.330056	0.266399	0.069969	0.090258	0.041707	0.012741	0.028966	0.02995	0.005679	0.002637	0.005607	0.002175	0.001685	0.001178
HeavyR	0	0	0	0.20868	0.21065	0.215955	0.660102	0.669944	0.733601	0.930031	0.909742	0.958293	0.987259	0.971034	0.97005	0.994321	0.997363	0.994393	0.997825	0.998315	0.998822
H33K27me3K36me2
LightR	1	0.998705	1	0.80715	0.812462	0.793692	0.534736	0.54104	0.509279	0.34178	0.338308	0.316383	0.240861	0.213137	0.240941	0	0	0	0	0	0
HeavyR	0	0.001295	0	0.19285	0.187538	0.206308	0.465264	0.45896	0.490721	0.65822	0.661692	0.683617	0.759139	0.786863	0.759059	0	0	0	0	0	0
H33K27ac
LightR	1	1	1	0	0	0	0	0	0	0	0	0	0	0	0	0	0	0	0	0	0
HeavyR	0	0	0	0	0	0	0	0	0	0	0	0	0	0	0	0	0	0	0	0	0
H3K56un
LightR	1	1	1	0.495281	0.493021	0.489243	0.219869	0.213923	0.218538	0.093336	0.087645	0.088967	0.04602	0.044524	0.047505	0.011309	0.011444	0.010911	0.006224	0.007247	0.007014
HeavyR	0	0	0	0.504719	0.506979	0.510757	0.780131	0.786077	0.781462	0.906664	0.912355	0.911033	0.95398	0.955476	0.952495	0.988691	0.988556	0.989089	0.993776	0.992753	0.992986
H3K56me1
LightR	1	0	1	0.268578	0.14688	0	0.638258	0	0	0.05004	0.26512	0	0.074668	0.001324	0	0.026191	0.105277	1	0.957304	0.97876	1
HeavyR	0	0	0	0.731422	0.85312	0	0.361742	0	0	0.94996	0.73488	0	0.925332	0.998676	0	0.973809	0.894723	0	0.042696	0.02124	0
H3K56me2
LightR	1	1	0.991234	0	0	0	0	0	0	0	0	0	0	1	0	0	0	0	0	0	0
HeavyR	0	0	0.008766	1	0	0	0	0	0	0	0	0	0	0	0	1	0	0	0	0	0
H3K56me3
LightR	0	0	0	1	1	1	0.997098	1	1	1	1	1	1	1	1	1	0.999925	1	0.998775	1	1
HeavyR	0	0	0	0	0	0	0.002902	0	0	0	0	0	0	0	0	0	7.5e-05	0	0.001225	0	0
H3K56ac
LightR	1	0.377821	0.905956	1	1	1	1	1	1	1	1	1	1	1	1	1	1	1	1	1	1
HeavyR	0	0.622179	0.094044	0	0	0	0	0	0	0	0	0	0	0	0	0	0	0	0	0	0
H3K79un
LightR	1	1	1	0.487646	0.486253	0.469362	0.209887	0.204087	0.192122	0.092444	0.086488	0.086372	0.043995	0.043419	0.045151	0.011575	0.010989	0.010927	0.006896	0.008011	0.007504
HeavyR	0	0	0	0.512354	0.513747	0.530638	0.790113	0.795913	0.807878	0.907556	0.913512	0.913628	0.956005	0.956581	0.954849	0.988425	0.989011	0.989073	0.993104	0.991989	0.992496
H3K79me1
LightR	1	1	1	0.686632	0.687976	0.686549	0.371766	0.36122	0.347443	0.173888	0.164432	0.162235	0.087155	0.080963	0.087767	0.020336	0.019832	0.017314	0	0.007797	0
HeavyR	0	0	0	0.313368	0.312024	0.313451	0.628234	0.63878	0.652557	0.826112	0.835568	0.837765	0.912845	0.919037	0.912233	0.979664	0.980168	0.982686	0	0.992203	0
H3K79me2
LightR	1	1	1	0.779708	0.788724	0.782084	0.447018	0.443496	0.446984	0.231996	0.22526	0.218367	0.116649	0	0.136253	0.054083	0.022878	0	1	0	0
HeavyR	0	0	0	0.220292	0.211276	0.217916	0.552982	0.556504	0.553016	0.768004	0.77474	0.781633	0.883351	0	0.863747	0.945917	0.977122	0	0	0	0
H3K79me3
LightR	1	0.99411	0	1	0.585593	0.556505	0	0	0.10692	0	0	0	0	1	0	0	0	1	1	1	1
HeavyR	0	0.00589	0	0	0.414407	0.443495	1	0	0.89308	1	1	0	1	0	1	1	1	0	0	0	0
H3K79ac
LightR	1	1	1	0.48935	0.448568	0.48537	0	0.088508	1	0.048795	0.720327	0	0	0.918079	0	0.530112	0	0	0	0	0
HeavyR	0	0	0	0.51065	0.551432	0.51463	0	0.911492	0	0.951205	0.279673	0	0	0.081921	0	0.469888	0	0	0	0	0
H3K122un
LightR	1	1	1	0.487237	0.500045	0.458011	0.193016	0.207164	0.209543	0.102944	0.090494	0.094532	0.045954	0.046821	0.050215	0.012289	0.010895	0.014328	0.006677	0.007851	0.007538
HeavyR	0	0	0	0.512763	0.499955	0.541989	0.806984	0.792836	0.790457	0.897056	0.909506	0.905468	0.954046	0.953179	0.949785	0.987711	0.989105	0.985672	0.993323	0.992149	0.992462
H3K122ac
LightR	1	1	1	1	0.319026	1	0.912425	1	0.999503	1	1	1	1	1	1	0	1	1	1	1	1
HeavyR	0	0	0	0	0.680974	0	0.087575	0	0.000497	0	0	0	0	0	0	0	0	0	0	0	0
H4K5K8K12K16un
LightR	1	1	1	0.521822	0.522983	0.521906	0.234503	0.229728	0.231656	0.101823	0.099671	0.099957	0.051072	0.05007	0.052673	0.012764	0.011969	0.012451	0.006566	0.007605	0.007511
HeavyR	0	0	0	0.478178	0.477017	0.478094	0.765497	0.770272	0.768344	0.898177	0.900329	0.900043	0.948928	0.94993	0.947327	0.987236	0.988031	0.987549	0.993434	0.992395	0.992489
H4K5K8K12K16-1ac
K5acLightR	0.061991	0.065912	0.066388	0.029513	0.030677	0.032173	0.01516	0.01458	0.014749	0.006499	0.006326	0.006004	0.003105	0.003224	0.003386	0.000621	0.000289	0.000405	0.000121	0.000392	0.000114
K8acLightR	0.109194	0.108127	0.096785	0.063205	0.062127	0.058997	0.028588	0.027396	0.029169	0.010278	0.009936	0.010202	0.004484	0.005542	0.005171	0.001158	0.000932	0.001247	0.000521	0.00077	0.00053
K12acLightR	0.235782	0.259356	0.251199	0.077133	0.086415	0.082935	0.026212	0.025322	0.025279	0.008512	0.009434	0.008825	0.003617	0.003633	0.003745	0.000862	0.000901	0.001018	0.000593	0.000768	0.000558
K16acLightR	0.593033	0.566604	0.585629	0.303197	0.28824	0.293753	0.135501	0.132857	0.1302	0.059432	0.056818	0.058236	0.030535	0.028161	0.032856	0.006239	0.006306	0.007695	0.003863	0.005468	0.003795
K5acHeavyR	0	0	0	0.036891	0.039196	0.039218	0.057162	0.058806	0.058795	0.06639	0.065912	0.068456	0.064545	0.071074	0.066494	0.073632	0.066814	0.067103	0.063491	0.063596	0.06596
K8acHeavyR	0	0	0	0.053004	0.053657	0.051818	0.087634	0.086515	0.093065	0.10098	0.090272	0.10419	0.093152	0.101342	0.092316	0.123485	0.113054	0.118704	0.093328	0.097843	0.094281
K12acHeavyR	0	0	0	0.034504	0.045915	0.044091	0.070904	0.079288	0.082536	0.085025	0.095158	0.093605	0.083041	0.090206	0.081656	0.10119	0.106819	0.105237	0.0886	0.090624	0.079931
K16acHeavyR	0	0	0	0.402554	0.393772	0.397015	0.57884	0.575235	0.566207	0.662886	0.666144	0.650482	0.717522	0.696818	0.714376	0.692813	0.704887	0.698591	0.749483	0.74054	0.75483
H4K5K8K12K16-2ac
K5acK8acLightR	0.05432	0.058465	0.055921	0.044814	0.045093	0.043781	0.021562	0.021059	0.020834	0.010124	0.009989	0.008435	0.005669	0.005946	0.005366	0.002071	0.001962	0.001914	0.001268	0.001644	0.001635
K5acK12acLightR	0.113417	0.121933	0.120499	0.030787	0.032159	0.03093	0.010944	0.012212	0.011548	0.004108	0.004201	0.005285	0.001865	0.001549	0.002158	0.000232	0.00031	0.000454	0.000346	0.000449	0.000322
K5acK16acLightR	0.049934	0.043559	0.052197	0.006033	0.004194	0.004475	0.000438	0.000668	0.000379	7.3e-05	0.000239	0.000426	0.000352	0.000161	0.000453	7.7e-05	0.000162	0.000242	0.000152	0.000167	0.000219
K8acK12acLightR	0.149595	0.155202	0.147901	0.050814	0.050334	0.048586	0.013831	0.009745	0.009106	0.002795	0.00226	0.001703	0.001115	0.001106	0.001144	0.000274	0.000217	0.000296	0.000287	0.000286	0.000289
K8acK16acLightR	0.208215	0.198637	0.211705	0.097856	0.095729	0.093335	0.044896	0.043195	0.043355	0.019797	0.018883	0.018168	0.010372	0.009696	0.009717	0.002856	0.003178	0.003346	0.002271	0.002905	0.002955
K12acK16acLightR	0.424519	0.422205	0.411777	0.130688	0.127263	0.129403	0.050183	0.048825	0.049388	0.020553	0.019493	0.021307	0.011557	0.0118	0.012637	0.002279	0.00212	0.002483	0.002098	0.002301	0.001949
K5acK8acHeavyR	0	0	0	0.067969	0.069779	0.06946	0.077392	0.085346	0.082926	0.083823	0.088889	0.073777	0.074413	0.086766	0.07332	0.108904	0.095706	0.090003	0.068671	0.074655	0.072424
K5acK12acHeavyR	0	0	0	0.056459	0.05965	0.060671	0.077256	0.084304	0.084803	0.085716	0.090907	0.096877	0.081262	0.074428	0.083149	0.083093	0.090085	0.09753	0.076422	0.087643	0.083094
K5acK16acHeavyR	0	0	0	0.027782	0.027943	0.02799	0.043509	0.043454	0.03816	0.051309	0.051186	0.058196	0.065611	0.059525	0.065197	0.041281	0.048318	0.046086	0.065198	0.060266	0.067576
K8acK12acHeavyR	0	0	0	0.06125	0.06617	0.064539	0.100707	0.098373	0.099065	0.103179	0.103535	0.095083	0.079388	0.088326	0.072501	0.127762	0.118861	0.120884	0.084383	0.08664	0.077966
K8acK16acHeavyR	0	0	0	0.198629	0.195447	0.195764	0.256679	0.246391	0.244609	0.272242	0.269702	0.257074	0.275678	0.269019	0.268725	0.284922	0.287893	0.283071	0.285642	0.284382	0.286453
K12acK16acHeavyR	0	0	0	0.226918	0.226237	0.231065	0.302603	0.306428	0.315826	0.346281	0.340716	0.36367	0.392717	0.391679	0.405632	0.34625	0.351187	0.353691	0.413261	0.398663	0.405118
H4K5K8K12K16-3ac
K5prLightR	0.406521	0.413499	0.404841	0.134355	0.135097	0.132029	0.053788	0.050847	0.057536	0.019863	0.023001	0.020946	0.012941	0.013752	0.018408	0	6.9e-05	0.004597	0.002448	0.001764	0.003254
K8prLightR	0.174606	0.158536	0.178689	0.043352	0.021634	0.027163	0.017574	0.011232	0.007227	0.006075	0.004941	0.003383	0.003639	0.000326	0.002271	0	0.000137	0.000301	0.000526	0.000536	0.000309
K12prLightR	0.074249	0.067882	0.07142	0.032697	0.046727	0.041927	0.01377	0.021095	0.016386	0.00879	0.010461	0.007345	0.004311	0.002667	0.00421	0	0.000654	0.001111	0.00014	0.001331	0.00134
K16prLightR	0.344623	0.360084	0.34505	0.161721	0.147182	0.152785	0.052255	0.049953	0.049297	0.017658	0.0162	0.017548	0.00912	0.004918	0.009381	0	0.000387	0.001787	0.000891	0.001357	0.001617
K5prHeavyR	0	0	0	0.228495	0.234578	0.229414	0.333673	0.321915	0.3751	0.367704	0.383874	0.401259	0.427551	0.462022	0.464154	0	0.371678	0.419793	0.444532	0.451338	0.458571
K8prHeavyR	0	0	0	0.051344	0.045125	0.051139	0.09724	0.069673	0.065537	0.109268	0.106577	0.110587	0.138846	0.081377	0.119495	0	0.068617	0.064887	0.125814	0.117536	0.11686
K12prHeavyR	0	0	0	0.021318	0.032023	0.019288	0.054796	0.047622	0.029998	0.054735	0.053196	0.059167	0.061131	0.04879	0.077602	0	0.062068	0.063069	0.070325	0.063913	0.089103
K16prHeavyR	0	0	0	0.326718	0.337635	0.346254	0.376904	0.427662	0.39892	0.415906	0.401751	0.379766	0.342462	0.386148	0.30448	0	0.49639	0.444455	0.355323	0.362225	0.328948
H4K5K8K12K16-4ac
LightR	1	0.999609	1	0	0.278389	0.274779	0	0.108095	0.108632	0.014653	0.032829	0.04549	0.007413	0.020261	0.025277	0.000368	0	0.004814	0.003768	0.00356	0.003835
HeavyR	0	0.000391	0	0	0.721611	0.725221	0	0.891905	0.891368	0.985347	0.967171	0.95451	0.992587	0.979739	0.974723	0.999632	0	0.995186	0.996232	0.99644	0.996165
H4K20un
LightR	1	1	1	0.016846	0.015988	0.016769	0.010054	0.009889	0.01055	0.011046	0.011314	0.011784	0.013804	0.014631	0.015466	0.003874	0.004494	0.004497	0.007678	0.009304	0.008932
HeavyR	0	0	0	0.983154	0.984012	0.983231	0.989946	0.990111	0.98945	0.988954	0.988686	0.988216	0.986196	0.985369	0.984534	0.996126	0.995506	0.995503	0.992322	0.990696	0.991068
H4K20me1
LightR	1	1	1	0.280836	0.26895	0.273563	0.068103	0.063978	0.065895	0.031812	0.029943	0.029901	0.022585	0.021082	0.02191	0.005164	0.005507	0.005296	0.006016	0.007374	0.006881
HeavyR	0	0	0	0.719164	0.73105	0.726437	0.931897	0.936022	0.934105	0.968188	0.970057	0.970099	0.977415	0.978918	0.97809	0.994836	0.994493	0.994704	0.993984	0.992626	0.993119
H4K20me2
LightR	1	1	1	0.172342	0.196073	0.195545	0.037196	0.042154	0.04076	0.012565	0.01292	0.012692	0.005645	0.006096	0.005316	0.001263	0.001119	0.001258	0.000404	0.000399	0.000441
HeavyR	0	0	0	0.827658	0.803927	0.804455	0.962804	0.957846	0.95924	0.987435	0.98708	0.987308	0.994355	0.993904	0.994684	0.998737	0.998881	0.998742	0.999596	0.999601	0.999559
H4K20me3
LightR	1	1	1	0.858675	0.85777	0.857463	0.525776	0.523048	0.518164	0.282808	0.272363	0.274436	0.138474	0.132906	0.134138	0.036383	0.03333	0.034963	0.009216	0.010664	0.010435
HeavyR	0	0	0	0.141325	0.14223	0.142537	0.474224	0.476952	0.481836	0.717192	0.727637	0.725564	0.861526	0.867094	0.865862	0.963617	0.96667	0.965037	0.990784	0.989336	0.989565
H4K20ac
LightR	1	1	1	0.246104	0.335156	0.095029	0	0	0	0	0	0	0	0	0	0	0	0	0	0	0
HeavyR	0	0	0	0.753896	0.664844	0.904971	0	0	0	0	0	0	0	0	0	0	0	0	0	0	0
H4K44un
LightR	1	1	1	0.500187	0.498991	0.499807	0.21873	0.21384	0.21236	0.088085	0.084822	0.082983	0.036644	0.03413	0.036746	0.006864	0.006053	0.006429	0.001135	0.001058	0.000984
HeavyR	0	0	0	0.499813	0.501009	0.500193	0.78127	0.78616	0.78764	0.911915	0.915178	0.917017	0.963356	0.96587	0.963254	0.993136	0.993947	0.993571	0.998865	0.998942	0.999016
H4K44ac
LightR	1	0.998248	1	0.424577	0.595161	0.452626	1	0.218445	0.036638	0	0	0.014755	1	0	0	1	0	0	0	0	1
HeavyR	0	0.001752	0	0.575423	0.404839	0.547374	0	0.781555	0.963362	0	0	0.985245	0	0	0	0	0	0	0	0	0

## Sheet: differentiation
	undiff_unlabelctrl_B1	undiff_unlabelctrl_B2	unlabelctrl_B3	diff_0_5_B1	diff_0_5_B2	diff_0_5_B3	diff_1_B1	diff_1_B2	diff_1_B3	diff_1_5_B1	diff_1_5_B2	diff_1_5_B3	diff_2_B1	diff_2_B2	diff_2_B3	diff_3_B1	diff_3_B2	diff_3_B3	diff_4_B1	diff_4_B2	diff_4_B3
Peptide	Ratio	Ratio	Ratio	Ratio	Ratio	Ratio	Ratio	Ratio	Ratio	Ratio	Ratio	Ratio	Ratio	Ratio	Ratio	Ratio	Ratio	Ratio	Ratio	Ratio	Ratio
H3K4un
LightR	1	1	1	0.538811	0.531774	0.535344	0.320766	0.301065	0.313912	0.263328	0.238578	0.264128	0.257396	0.226403	0.258252	0.182642	0.162512	0.18262	0.158519	0.148661	0.164501
HeavyR	0	0	0	0.461189	0.468226	0.464656	0.679234	0.698935	0.686088	0.736672	0.761422	0.735872	0.742604	0.773597	0.741748	0.817358	0.837488	0.81738	0.841481	0.851339	0.835499
H3K4me1
LightR	1	1	1	0.631366	0.622155	0.630657	0.361179	0.346042	0.355292	0.269912	0.243717	0.271055	0.250033	0.218747	0.247716	0.182941	0.161007	0.180524	0.153428	0.141083	0.154749
HeavyR	0	0	0	0.368634	0.377845	0.369343	0.638821	0.653958	0.644708	0.730088	0.756283	0.728945	0.749967	0.781253	0.752284	0.817059	0.838993	0.819476	0.846572	0.858917	0.845251
H3K4me2
LightR	1	1	1	0.466971	0.456161	0.45893	0.261274	0.244919	0.261393	0.220756	0.197106	0.222661	0.223129	0.200836	0.226368	0.14965	0.132675	0.15716	0.140397	0.128393	0.150012
HeavyR	0	0	0	0.533029	0.543839	0.54107	0.738726	0.755081	0.738607	0.779244	0.802894	0.777339	0.776871	0.799164	0.773632	0.85035	0.867325	0.84284	0.859603	0.871607	0.849988
H3K4me3
LightR	0.99026	0.999482	0.999219	0.42614	0.401762	0.412505	0.229151	0.213079	0.23177	0.196409	0.170247	0.214432	0.222435	0.199114	0.224041	0.150161	0.122317	0.148641	0.135172	0.12382	0.145134
HeavyR	0.00974	0.000518	0.000781	0.57283	0.598238	0.587495	0.770849	0.786921	0.76823	0.803591	0.829753	0.785568	0.777565	0.800886	0.775959	0.849839	0.877683	0.851359	0.864828	0.87618	0.854866
H3K4ac
LightR	0.997798	1	1	0.529288	0.481774	0.491467	0.261465	0.249848	0.259308	0.033886	0.190204	0.194249	0.178917	0.150188	0.175751	0.104965	0.047174	0.134597	0.10185	0.10308	0.086292
HeavyR	0.002202	0	0	0.470712	0.518226	0.508533	0.738535	0.750152	0.740692	0.966114	0.809796	0.805751	0.821083	0.849812	0.824249	0.895035	0.952826	0.865403	0.89815	0.89692	0.913708
H3K9K14un
LightR	1	1	1	0.4123	0.410208	0.40991	0.262285	0.245165	0.260395	0.241742	0.214425	0.243568	0.249743	0.214844	0.251535	0.162861	0.144479	0.165118	0.14785	0.134483	0.154646
HeavyR	0	0	0	0.5877	0.589792	0.59009	0.737715	0.754835	0.739605	0.758258	0.785575	0.756432	0.750257	0.785156	0.748465	0.837139	0.855521	0.834882	0.85215	0.865517	0.845354
H3K9me1
LightR	1	1	1	0.528858	0.524712	0.532039	0.295276	0.278823	0.297507	0.23763	0.219182	0.244494	0.241097	0.205415	0.239922	0.165913	0.14578	0.168296	0.146252	0.134915	0.151126
HeavyR	0	0	0	0.471142	0.475288	0.467961	0.704724	0.721177	0.702493	0.76237	0.780818	0.755506	0.758903	0.794585	0.760078	0.834087	0.85422	0.831704	0.853748	0.865085	0.848874
H3K9me2
LightR	1	1	1	0.662056	0.653438	0.662517	0.369176	0.348082	0.364715	0.262091	0.244692	0.272613	0.251781	0.219002	0.252532	0.1948	0.170977	0.192845	0.164784	0.149611	0.162611
HeavyR	0	0	0	0.337944	0.346562	0.337483	0.630824	0.651918	0.635285	0.737909	0.755308	0.727387	0.748219	0.780998	0.747468	0.8052	0.829023	0.807155	0.835216	0.850389	0.837389
H3K9me3
LightR	1	1	1	0.749933	0.74213	0.747444	0.447075	0.429692	0.449463	0.313878	0.287817	0.316307	0.277309	0.243162	0.271328	0.20233	0.176281	0.194672	0.162214	0.151609	0.166047
HeavyR	0	0	0	0.250067	0.25787	0.252556	0.552925	0.570308	0.550537	0.686122	0.712183	0.683693	0.722691	0.756838	0.728672	0.79767	0.823719	0.805328	0.837786	0.848391	0.833953
H3K9ac|K14ac
K9acLightR	0.038701	0.036743	0.038386	0.03243	0.04687	0.027372	0.016747	0.027678	0.013581	0.023649	0.019862	0.012731	0.025342	0.024273	0.023176	0.013376	0.014175	0.007429	0.008861	0.01018	0.005578
K14acLightR	0.961299	0.963257	0.961614	0.300582	0.286979	0.309415	0.203265	0.176745	0.208749	0.203708	0.176766	0.218182	0.214358	0.181046	0.214575	0.135088	0.117856	0.142866	0.130832	0.115195	0.142668
K9acHeavyR	0	0	0	0.044952	0.06594	0.035567	0.039495	0.050275	0.032141	0.038588	0.048908	0.044697	0.061841	0.074968	0.058965	0.048434	0.068159	0.041711	0.039447	0.051422	0.03542
K14acHeavyR	0	0	0	0.622036	0.600212	0.627645	0.740493	0.745303	0.745529	0.734056	0.754465	0.724391	0.698458	0.719713	0.703284	0.803102	0.799809	0.807994	0.82086	0.823203	0.816334
H3K9me1K14ac
LightR	1	1	1	0.43538	0.428472	0.438762	0.261535	0.246876	0.259625	0.235833	0.210701	0.238257	0.249301	0.212899	0.248582	0.172076	0.153526	0.170742	0.153168	0.137098	0.156323
HeavyR	0	0	0	0.56462	0.571528	0.561238	0.738465	0.753124	0.740375	0.764167	0.789299	0.761743	0.750699	0.787101	0.751418	0.827924	0.846474	0.829258	0.846832	0.862902	0.843677
H3K9me2K14ac
LightR	1	1	1	0.579702	0.570181	0.582239	0.327592	0.311133	0.323861	0.25492	0.228768	0.25749	0.246838	0.215494	0.242178	0.182524	0.161537	0.180437	0.154484	0.143162	0.156376
HeavyR	0	0	0	0.420298	0.429819	0.417761	0.672408	0.688867	0.676139	0.74508	0.771232	0.74251	0.753162	0.784506	0.757822	0.817476	0.838463	0.819563	0.845516	0.856838	0.843624
H3K9me3K14ac
LightR	1	1	1	0.717103	0.708597	0.714186	0.451077	0.43425	0.445195	0.338391	0.31242	0.334738	0.294526	0.268792	0.300868	0.219207	0.19525	0.216611	0.177981	0.165576	0.179469
HeavyR	0	0	0	0.282897	0.291403	0.285814	0.548923	0.56575	0.554805	0.661609	0.68758	0.665262	0.705474	0.731208	0.699132	0.780793	0.80475	0.783389	0.822019	0.834424	0.820531
H3K9acK14ac
LightR	1	1	1	0.46879	0.449396	0.538164	0.293912	0.256096	0.287021	0.291394	0.258676	0.301829	0.24577	0.218159	0.251247	0.182542	0.128998	0.15196	0.135209	0.11568	0.144991
HeavyR	0	0	0	0.53121	0.550604	0.461836	0.706088	0.743904	0.712979	0.708606	0.741324	0.698171	0.75423	0.781841	0.748753	0.817458	0.871002	0.84804	0.864791	0.88432	0.855009
H3K18K23un
LightR	1	1	1	0.601662	0.59087	0.5988	0.358765	0.341422	0.354933	0.279747	0.249924	0.277979	0.262538	0.227991	0.261084	0.186818	0.165983	0.183129	0.156959	0.149586	0.161803
HeavyR	0	0	0	0.398338	0.40913	0.4012	0.641235	0.658578	0.645067	0.720253	0.750076	0.722021	0.737462	0.772009	0.738916	0.813182	0.834017	0.816871	0.843041	0.850414	0.838197
H3K18me1|K23me1
LightR	1	1	1	0.936966	0.911183	0.941381	0.660946	0.545966	0.283273	0.307251	0.214173	0.229818	0.286588	0.197646	0.22535	0.22581	0.142084	0.211464	0.146914	0.154437	0.142742
HeavyR	0	0	0	0.063034	0.088817	0.058619	0.339054	0.454034	0.716727	0.692749	0.785827	0.770182	0.713412	0.802354	0.77465	0.77419	0.857916	0.788536	0.853086	0.845563	0.857258
H3K18me1K23me1
LightR	1	0.993376	1	0.492726	0.478401	0.491924	0.22949	0.19671	0.196679	0.195197	0.144404	0.132854	0.195195	0.164613	0.188748	0.160361	0.12091	0.079915	0.14599	0.22254	0.007825
HeavyR	0	0.006624	0	0.507274	0.521599	0.508076	0.77051	0.80329	0.803321	0.804803	0.855596	0.867146	0.804805	0.835387	0.811252	0.839639	0.87909	0.920085	0.85401	0.77746	0.992175
H3K18ac|K23ac
K18acLightR	0.167401	0.153604	0.163567	0.084577	0.080574	0.082023	0.049836	0.052944	0.051664	0.043618	0.037085	0.042319	0.041948	0.036393	0.044797	0.031215	0.028703	0.030465	0.019794	0.019391	0.021842
K23acLightR	0.832599	0.846396	0.836433	0.377846	0.376599	0.377262	0.222415	0.203867	0.220563	0.195385	0.174726	0.199285	0.199223	0.169327	0.194921	0.13155	0.116343	0.132368	0.12463	0.112944	0.12747
K18acHeavyR	0	0	0	0.086254	0.085316	0.085197	0.125846	0.145651	0.131505	0.135147	0.134951	0.130133	0.129091	0.141895	0.142679	0.156091	0.166178	0.153006	0.118458	0.126367	0.121445
K23acHeavyR	0	0	0	0.451323	0.457512	0.455518	0.601903	0.597538	0.596267	0.62585	0.653237	0.628262	0.629738	0.652385	0.617603	0.681144	0.688776	0.684161	0.737119	0.741297	0.729243
H3K18acK23ac
LightR	1	1	1	0.396619	0.388443	0.38998	0.249422	0.233376	0.246908	0.227541	0.204924	0.23224	0.237163	0.206648	0.237293	0.16031	0.147785	0.164639	0.145089	0.138781	0.154649
HeavyR	0	0	0	0.603381	0.611557	0.61002	0.750578	0.766624	0.753092	0.772459	0.795076	0.76776	0.762837	0.793352	0.762707	0.83969	0.852215	0.835361	0.854911	0.861219	0.845351
H3K27K36un
LightR	1	1	0.999998	0.079162	0.070352	0.076279	0.116563	0.100443	0.119733	0.198496	0.166991	0.198724	0.22751	0.19005	0.228924	0.124294	0.105014	0.126455	0.131501	0.113872	0.136667
HeavyR	0	0	2e-06	0.920838	0.929648	0.923721	0.883437	0.899557	0.880267	0.801504	0.833009	0.801276	0.77249	0.80995	0.771076	0.875706	0.894986	0.873545	0.868499	0.886128	0.863333
H3K27me1
LightR	0.999752	0.998978	0.999317	0.131468	0.12042	0.128232	0.115406	0.101341	0.118372	0.181918	0.152381	0.178574	0.214276	0.180424	0.217952	0.128958	0.111574	0.129462	0.132163	0.116034	0.13628
HeavyR	0.000248	0.001022	0.000683	0.868532	0.87958	0.871768	0.884594	0.898659	0.881628	0.818082	0.847619	0.821426	0.785724	0.819576	0.782048	0.871042	0.888426	0.870538	0.867837	0.883966	0.86372
H3K27me2
LightR	0.999792	0.998567	0.998016	0.340707	0.323849	0.339004	0.167232	0.149246	0.165845	0.175316	0.152747	0.17636	0.201553	0.170305	0.204379	0.146872	0.124415	0.146247	0.136589	0.125216	0.145238
HeavyR	0.000208	0.001433	0.001984	0.659293	0.676151	0.660996	0.832768	0.850754	0.834155	0.824684	0.847253	0.82364	0.798447	0.829695	0.795621	0.853128	0.875585	0.853753	0.863411	0.874784	0.854762
H3K36me2
LightR	0.984316	0.983435	0.983282	0.334057	0.322748	0.333744	0.166175	0.148179	0.168299	0.173757	0.147585	0.172337	0.20764	0.177246	0.20633	0.134351	0.11349	0.136976	0.132443	0.119507	0.137613
HeavyR	0.015684	0.016565	0.016718	0.665943	0.677252	0.666256	0.833825	0.851821	0.831701	0.826243	0.852415	0.827663	0.79236	0.822754	0.79367	0.865649	0.88651	0.863024	0.867557	0.880493	0.862387
H3K27me3
LightR	1	0.99964	0.999517	0.653312	0.643395	0.661802	0.39882	0.375542	0.385408	0.310438	0.296776	0.298484	0.302495	0.257604	0.293084	0.248115	0.21432	0.234903	0.22038	0.213247	0.230287
HeavyR	0	0.00036	0.000483	0.346688	0.356605	0.338198	0.60118	0.624458	0.614592	0.689562	0.703224	0.701516	0.697505	0.742396	0.706916	0.751885	0.78568	0.765097	0.77962	0.931303	0.894552
H3K27me2K36me1
LightR	1	1	1	0.611785	0.600936	0.608242	0.305304	0.285772	0.3006	0.22817	0.207888	0.231325	0.227819	0.202917	0.228022	0.179129	0.157024	0.175242	0.154073	0.143262	0.160158
HeavyR	0	0	0	0.388215	0.399064	0.391758	0.694696	0.714228	0.6994	0.77183	0.792112	0.768675	0.772181	0.797083	0.771978	0.820871	0.842976	0.824758	0.845927	0.856738	0.839842
H3K27me1K36me2
LightR	1	1	1	0.540152	0.528489	0.539661	0.258568	0.243418	0.257321	0.203333	0.182723	0.205837	0.216339	0.184166	0.216835	0.162804	0.143069	0.159717	0.143862	0.13066	0.150407
HeavyR	0	0	0	0.459848	0.471511	0.460339	0.741432	0.756582	0.742679	0.796667	0.817277	0.794163	0.783661	0.815834	0.783165	0.837196	0.856931	0.840283	0.856138	0.86934	0.849593
H3K27me1K36me1
LightR	1	1	1	0.303822	0.283615	0.297062	0.156482	0.141567	0.158543	0.180364	0.155559	0.182059	0.217112	0.179923	0.221267	0.141903	0.122142	0.143597	0.141406	0.127582	0.143732
HeavyR	0	0	0	0.696178	0.716385	0.702938	0.843518	0.858433	0.841457	0.819636	0.844441	0.817941	0.782888	0.820077	0.778733	0.858097	0.877858	0.856403	0.858594	0.872418	0.856268
H3K27me3K36me1
LightR	1	1	1	0.847229	0.847197	0.848186	0.541489	0.543121	0.538638	0.449745	0.329755	0.364413	0.277689	0.236508	0.281218	0.200352	0.17383	0.198248	0.101328	0.116014	0.135258
HeavyR	0	0	0	0.152771	0.152803	0.151814	0.458511	0.456879	0.461362	0.550255	0.670245	0.635587	0.722311	0.763492	0.718782	0.799648	0.82617	0.801752	0.898672	0.883986	0.864742
H3K27me1K36me3
LightR	1	1	1	0.787874	0.778764	0.779921	0.407986	0.414756	0.42558	0.114072	0.072252	0.11642	0.041961	0.054147	0.086886	0.013361	0.032261	0.018234	0.005617	0.007769	0.012302
HeavyR	0	0	0	0.212126	0.221236	0.220079	0.592014	0.585244	0.57442	0.885928	0.927748	0.88358	0.958039	0.945853	0.913114	0.986639	0.967739	0.981766	0.994383	0.992231	0.987698
H3K27me2K36me2
LightR	1	1	0.999975	0.807436	0.802279	0.808388	0.50153	0.486185	0.495093	0.340332	0.322536	0.344938	0.287241	0.257802	0.285641	0.218126	0.194832	0.214178	0.171648	0.163338	0.179095
HeavyR	0	0	2.5e-05	0.192564	0.197721	0.191612	0.49847	0.513815	0.504907	0.659668	0.677464	0.655062	0.712759	0.742198	0.714359	0.781874	0.805168	0.785822	0.828352	0.836662	0.820905
H3K27me3K36me2
LightR	1	1	1	0.916373	0.918287	0.916862	0.700093	0.705676	0.696462	0.539374	0.522664	0.520906	0.428533	0.405443	0.425619	0.308996	0.29124	0.313315	0.212133	0.203658	0.235438
HeavyR	0	0	0	0.083627	0.081713	0.083138	0.299907	0.294324	0.303538	0.460626	0.477336	0.479094	0.571467	0.594557	0.574381	0.691004	0.70876	0.686685	0.787867	0.796342	0.764562
H3K27ac
LightR	1	1	1	0.061268	0.05918	0.066502	0.113129	0.100705	0.11677	0.204917	0.170884	0.206902	0.235632	0.201366	0.235817	0.117839	0.09749	0.122732	0.131743	0.108191	0.135426
HeavyR	0	0	0	0.938732	0.94082	0.933498	0.886871	0.899295	0.88323	0.795083	0.829116	0.793098	0.764368	0.798634	0.764183	0.882161	0.90251	0.877268	0.868257	0.891809	0.864574
H33K27K36un
LightR	1	1	1	0.076132	0.067256	0.084867	0.094413	0.084015	0.109263	0.191976	0.153495	0.18894	0.214266	0.180946	0.210768	0.105782	0.095152	0.115398	0.120937	0.103819	0.129569
HeavyR	0	0	0	0.923868	0.932744	0.915133	0.905587	0.915985	0.890737	0.808024	0.846505	0.81106	0.785734	0.819054	0.789232	0.894218	0.904848	0.884602	0.879063	0.896181	0.870431
H33K27me1
LightR	0.879056	0.887801	0.891839	0.228851	0.3214	0.202587	0.184588	0.122449	0.135684	0.200051	0.206594	0.192158	0.245037	0.197884	0.251038	0.139336	0.123707	0.160787	0.143314	0.163718	0.154897
HeavyR	0.120944	0.112199	0.108161	0.771149	0.6786	0.797413	0.815412	0.877551	0.864316	0.799949	0.793406	0.807842	0.754963	0.802116	0.748962	0.860664	0.876293	0.839213	0.856686	0.836282	0.845103
H33K27me2
LightR	1	1	0.999191	0.29178	0.282304	0.295727	0.150688	0.151006	0.152849	0.183717	0.151943	0.172458	0.204091	0.16827	0.198416	0.122699	0.092572	0.123122	0.129546	0.110627	0.130736
HeavyR	0	0	0.000809	0.70822	0.717696	0.704273	0.849312	0.848994	0.847151	0.816283	0.848057	0.827542	0.795909	0.83173	0.801584	0.877301	0.907428	0.876878	0.870454	0.889373	0.869264
H33K36me2
LightR	0.999111	0.999289	0.999822	0.33009	0.338411	0.342428	0.179273	0.144122	0.159059	0.121662	0.140273	0.176656	0.067692	0.050555	0.195859	0.086333	0.105022	0.107691	0.039124	0.101534	0.079782
HeavyR	0.000889	0.000711	0.000178	0.66991	0.661589	0.657572	0.820727	0.855878	0.840941	0.878338	0.859727	0.823344	0.932308	0.949445	0.804141	0.913667	0.894978	0.892309	0.960876	0.898466	0.920218
H33K27me3
LightR	0.98817	1	1	0.541461	0.545135	0.564198	0.340119	0.32359	0.351782	0.285382	0.262304	0.293294	0.273382	0.270409	0.277605	0.232567	0.206212	0.225651	0.207937	0.173083	0.21162
HeavyR	0.01183	0	0	0.458539	0.454865	0.435802	0.659881	0.67641	0.648218	0.714618	0.737696	0.706706	0.726618	0.729591	0.722395	0.767433	0.793788	0.774349	0.792063	0.826917	0.78838
H33K27me2K36me1
LightR	1	1	1	0.551993	0.558529	0.613418	0.261389	0.235385	0.254339	0.182572	0.185749	0.189995	0.214544	0.19744	0.208584	0.15681	0.125864	0.146127	0.123627	0.121396	0.135536
HeavyR	0	0	0	0.448007	0.441471	0.386582	0.738611	0.764615	0.745661	0.817428	0.814251	0.810005	0.785456	0.80256	0.791416	0.84319	0.874136	0.853873	0.876373	0.878604	0.864464
H33K27me1K36me2
LightR	1	1	1	0.541722	0.532733	0.538507	0.259725	0.251268	0.258854	0.20262	0.18159	0.207477	0.207062	0.178393	0.212295	0.148149	0.122576	0.147118	0.132162	0.120526	0.137607
HeavyR	0	0	0	0.458278	0.467267	0.461493	0.740275	0.748732	0.741146	0.79738	0.81841	0.792523	0.792938	0.821607	0.787705	0.851851	0.877424	0.852882	0.867838	0.879474	0.862393
H33K27me1K36me1
LightR	1	1	0.998415	0.299869	0.299142	0.294529	0.146027	0.129644	0.130847	0.149423	0.10317	0.134728	0.220792	0.178702	0.192898	0.123595	0.085552	0.104997	0.127411	0.088822	0.09312
HeavyR	0	0	0.001585	0.700131	0.700858	0.705471	0.853973	0.870356	0.869153	0.850577	0.89683	0.865272	0.779208	0.821298	0.807102	0.876405	0.914448	0.895003	0.872589	0.911178	0.90688
H33K27me3K36me1
LightR	1	1	1	0.803484	0.790772	0.785171	0.505975	0.561267	0.550656	0.314637	0.353431	0.376825	0.196706	0.125794	0.296353	0.091545	0.188394	0.174663	0.157737	0.22434	0.096649
HeavyR	0	0	0	0.196516	0.209228	0.214829	0.494025	0.438733	0.449344	0.685363	0.646569	0.623175	0.803294	0.874206	0.703647	0.908455	0.811606	0.825337	0.842263	0.77566	0.903351
H33K27me1K36me3
LightR	1	1	1	0.786127	0.78372	0.783674	0.525444	0.500554	0.50917	0.37788	0.378247	0.364913	0.27085	0.270691	0.243136	0.09209	0.022036	0.077211	0.042155	0.03547	0.045445
HeavyR	0	0	0	0.213873	0.21628	0.216326	0.474556	0.499446	0.49083	0.62212	0.621753	0.635087	0.72915	0.729309	0.756864	0.90791	0.977964	0.922789	0.957845	0.96453	0.954555
H33K27me2K36me2
LightR	1	1	1	0.834065	0.842355	0.835558	0.503432	0.49248	0.478809	0.305942	0.214588	0.224392	0.224777	0.172963	0.200797	0.15379	0.11963	0.11552	0.118849	0.105881	0.10786
HeavyR	0	0	0	0.165935	0.157645	0.164442	0.496568	0.50752	0.521191	0.694058	0.785412	0.775608	0.775223	0.827037	0.799203	0.84621	0.88037	0.88448	0.881151	0.894119	0.89214
H33K27me3K36me2
LightR	1	0.998705	1	0.862457	0.857412	0.855686	0.669288	0.649885	0.651303	0.499501	0.501195	0.514451	0.447039	0.409051	0.424082	0.348002	0.315168	0.318529	0.253575	0.237981	0.279111
HeavyR	0	0.001295	0	0.137543	0.142588	0.144314	0.330712	0.350115	0.348697	0.500499	0.498805	0.485549	0.552961	0.590949	0.575918	0.651998	0.684832	0.681471	0.746425	0.762019	0.720889
H33K27ac
LightR	1	1	1	0	0	0	0.05443	0.028474	0.04485	0.190019	0.163171	0.201807	0.203671	0.172956	0.228549	0.136217	0.046663	0.140592	0.104032	0.102339	0.124509
HeavyR	0	0	0	0	0	0	0.94557	0.971526	0.95515	0.809981	0.836829	0.798193	0.796329	0.827044	0.771451	0.863783	0.953337	0.859408	0.895968	0.897661	0.875491
H3K56un
LightR	1	1	1	0.530049	0.519733	0.5237	0.305609	0.287639	0.301245	0.244109	0.222823	0.246828	0.239298	0.209381	0.238287	0.169751	0.151074	0.168134	0.148317	0.138564	0.154062
HeavyR	0	0	0	0.469951	0.480267	0.4763	0.694391	0.712361	0.698755	0.755891	0.777177	0.753172	0.760702	0.790619	0.761713	0.830249	0.848926	0.831866	0.851683	0.861436	0.845938
H3K56me1
LightR	1	0	1	0.773833	1	0	0	0	1	0	0.19578	0	0	1	1	0	0	0	0	0	0
HeavyR	0	0	0	0.226167	0	0	0	0	0	0	0.80422	0	0	0	0	0	0	0	0	0	0
H3K56me2
LightR	1	1	0.991234	0	0	0	0	0	0	0	0	0	0	1	0	0	1	0	0	0	0
HeavyR	0	0	0.008766	0	0	0	0	0	0	0	1	0	0	0	0	0	0	1	0	0	0
H3K56me3
LightR	0	0	0	1	0.999845	1	1	1	1	1	1	1	1	0.999796	1	0.999928	0.999769	1	0.999929	1	1
HeavyR	0	0	0	0	0.000155	0	0	0	0	0	0	0	0	0.000204	0	7.2e-05	0.000231	0	7.1e-05	0	0
H3K56ac
LightR	1	0.377821	0.905956	1	1	1	1	1	1	0.50572	0	0	1	1	1	1	1	1	0.914931	1	1
HeavyR	0	0.622179	0.094044	0	0	0	0	0	0	0.49428	0	0	0	0	0	0	0	0	0.085069	0	0
H3K79un
LightR	1	1	1	0.520415	0.51366	0.512577	0.31385	0.289512	0.302194	0.255446	0.230088	0.255139	0.252703	0.216901	0.245375	0.178223	0.15831	0.172455	0.154969	0.137901	0.159306
HeavyR	0	0	0	0.479585	0.48634	0.487423	0.68615	0.710488	0.697806	0.744554	0.769912	0.744861	0.747297	0.783099	0.754625	0.821777	0.84169	0.827545	0.845031	0.862099	0.840694
H3K79me1
LightR	1	1	1	0.746951	0.745011	0.746469	0.490033	0.462627	0.472653	0.35062	0.318289	0.347743	0.30365	0.279209	0.290655	0.220056	0.198911	0.216769	0.180736	0.173166	0.178257
HeavyR	0	0	0	0.253049	0.254989	0.253531	0.509967	0.537373	0.527347	0.64938	0.681711	0.652257	0.69635	0.720791	0.709345	0.779944	0.801089	0.783231	0.819264	0.826834	0.821743
H3K79me2
LightR	1	1	1	0.865472	0.853736	0.877354	0.616412	0.608498	0.720964	0.434191	0.472515	0.430772	0.350504	0.317849	0.385155	0.302261	0.222192	0.285556	0.205109	0.21879	0.205603
HeavyR	0	0	0	0.134528	0.146264	0.122646	0.383588	0.391502	0.279036	0.565809	0.527485	0.569228	0.649496	0.682151	0.614845	0.697739	0.777808	0.714444	0.794891	0.78121	0.794397
H3K79me3
LightR	1	0.99411	0	0	0	0	0	0	1	0	0	0	0	1	0	0	0	0	0	0	0
HeavyR	0	0.00589	0	0	0	0	0	0	0	0	0	0	0	0	0	0	0	0	0	0	0
H3K79ac
LightR	1	1	1	0.529076	0.567938	0.523776	0.907334	0.082027	1	0.182529	0.056752	0.928454	0.179594	0.030865	0.061157	0.114256	1	0.035859	0.112951	0.060357	0.073313
HeavyR	0	0	0	0.470924	0.432062	0.476224	0.092666	0.917973	0	0.817471	0.943248	0.071546	0.820406	0.969135	0.938843	0.885744	0	0.964141	0.887049	0.939643	0.926687
H3K122un
LightR	1	1	1	0.484446	0.459935	0.491196	0.275878	0.265197	0.308258	0.237469	0.226292	0.237608	0.24902	0.212774	0.226925	0.174996	0.156056	0.169769	0.149953	0.141753	0.154476
HeavyR	0	0	0	0.515554	0.540065	0.508804	0.724122	0.734803	0.691742	0.762531	0.773708	0.762392	0.75098	0.787226	0.773075	0.825004	0.843944	0.830231	0.850047	0.858247	0.845524
H3K122ac
LightR	1	1	1	0.946467	1	1	1	0.989107	1	1	1	1	0.955443	0.340908	1	1	1	1	0.977603	1	1
HeavyR	0	0	0	0.053533	0	0	0	0.010893	0	0	0	0	0.044557	0.659092	0	0	0	0	0.022397	0	0
H4K5K8K12K16un
LightR	1	1	1	0.608642	0.602521	0.607571	0.358323	0.339445	0.349831	0.269109	0.247866	0.270834	0.253981	0.222886	0.253587	0.182121	0.162564	0.178086	0.153933	0.145725	0.158248
HeavyR	0	0	0	0.391358	0.397479	0.392429	0.641677	0.660555	0.650169	0.730891	0.752134	0.729166	0.746019	0.777114	0.746413	0.817879	0.837436	0.821914	0.846067	0.854275	0.841752
H4K5K8K12K16-1ac
K5acLightR	0.061991	0.065912	0.066388	0.035703	0.037245	0.039195	0.021382	0.021402	0.024245	0.019962	0.016496	0.021085	0.018005	0.015683	0.017606	0.012367	0.009631	0.013262	0.009576	0.008855	0.010549
K8acLightR	0.109194	0.108127	0.096785	0.056928	0.059134	0.058918	0.036541	0.034469	0.036998	0.028706	0.027623	0.03003	0.028843	0.022827	0.02692	0.020344	0.016672	0.020171	0.01519	0.014703	0.016659
K12acLightR	0.235782	0.259356	0.251199	0.094087	0.096928	0.096044	0.041892	0.040952	0.046639	0.038693	0.030944	0.035346	0.032441	0.029086	0.03422	0.019615	0.015204	0.021049	0.017049	0.01556	0.016781
K16acLightR	0.593033	0.566604	0.585629	0.342611	0.324468	0.328185	0.208756	0.193554	0.196714	0.170377	0.155284	0.170146	0.172947	0.153571	0.175276	0.127188	0.116047	0.123046	0.114353	0.104835	0.117231
K5acHeavyR	0	0	0	0.039045	0.041882	0.04359	0.048346	0.052757	0.056143	0.05125	0.049294	0.05446	0.047379	0.048929	0.046294	0.052582	0.047758	0.0545	0.046608	0.04682	0.048316
K8acHeavyR	0	0	0	0.041387	0.043888	0.042209	0.058355	0.059707	0.058519	0.056819	0.059437	0.054281	0.054216	0.054666	0.049861	0.061126	0.060934	0.062554	0.048892	0.052816	0.051517
K12acHeavyR	0	0	0	0.027976	0.030804	0.03264	0.045387	0.048158	0.051309	0.044707	0.046992	0.043766	0.038323	0.041943	0.040118	0.042763	0.037416	0.044256	0.034152	0.036544	0.034945
K16acHeavyR	0	0	0	0.362264	0.365651	0.359218	0.539343	0.549	0.529433	0.589487	0.61393	0.590885	0.607847	0.633295	0.609704	0.664016	0.696337	0.661163	0.714181	0.719869	0.704002
H4K5K8K12K16-2ac
K5acK8acLightR	0.05432	0.058465	0.055921	0.030444	0.030409	0.031086	0.022183	0.021013	0.021312	0.019236	0.018704	0.018944	0.018211	0.018082	0.019071	0.015959	0.013944	0.015028	0.013087	0.01306	0.014557
K5acK12acLightR	0.113417	0.121933	0.120499	0.044446	0.043437	0.045899	0.030427	0.028165	0.03221	0.030915	0.026359	0.03214	0.027866	0.024671	0.029514	0.016123	0.014344	0.01884	0.016306	0.013842	0.015999
K5acK16acLightR	0.049934	0.043559	0.052197	0.014558	0.01264	0.012069	0.003127	0.005063	0.002961	0.003977	0.001766	0.005215	0.006416	0.004916	0.005128	0.003343	0.001441	0.001193	0.002634	0.001472	0.003551
K8acK12acLightR	0.149595	0.155202	0.147901	0.024584	0.029649	0.027401	0.013999	0.010215	0.012856	0.010906	0.009744	0.010428	0.008713	0.006826	0.010305	0.004255	0.003709	0.004514	0.002713	0.002354	0.003479
K8acK16acLightR	0.208215	0.198637	0.211705	0.106501	0.101273	0.103756	0.06833	0.061511	0.066336	0.060961	0.053765	0.060501	0.063778	0.056356	0.064835	0.04512	0.040614	0.046054	0.041774	0.036306	0.043916
K12acK16acLightR	0.424519	0.422205	0.411777	0.181964	0.171007	0.17415	0.110608	0.100846	0.108454	0.098439	0.088275	0.10023	0.104981	0.087838	0.102896	0.065384	0.060429	0.067191	0.061973	0.057188	0.064896
K5acK8acHeavyR	0	0	0	0.045127	0.045963	0.045444	0.048466	0.049059	0.047501	0.04372	0.048229	0.04285	0.042393	0.046368	0.04313	0.054268	0.050876	0.049416	0.046159	0.049089	0.048021
K5acK12acHeavyR	0	0	0	0.07673	0.085611	0.089845	0.07845	0.090147	0.087445	0.069399	0.071669	0.073384	0.052093	0.061624	0.05998	0.058177	0.053643	0.059791	0.054793	0.047528	0.053455
K5acK16acHeavyR	0	0	0	0.043972	0.041303	0.042939	0.057007	0.061219	0.055735	0.070293	0.065251	0.070979	0.076779	0.075414	0.070319	0.084246	0.084174	0.083328	0.096083	0.094995	0.095074
K8acK12acHeavyR	0	0	0	0.029242	0.033908	0.032198	0.037014	0.033475	0.033423	0.024208	0.028057	0.026939	0.021263	0.023049	0.021812	0.028133	0.031296	0.027825	0.018839	0.02016	0.02028
K8acK16acHeavyR	0	0	0	0.164593	0.169971	0.167082	0.205411	0.205017	0.211101	0.215631	0.218372	0.2105	0.214356	0.222327	0.216358	0.245174	0.250088	0.243538	0.247011	0.254756	0.246562
K12acK16acHeavyR	0	0	0	0.237839	0.234827	0.22813	0.324978	0.334271	0.320666	0.352314	0.36981	0.34789	0.363152	0.372529	0.356652	0.379817	0.395443	0.383281	0.398629	0.409249	0.390212
H4K5K8K12K16-3ac
K5prLightR	0.406521	0.413499	0.404841	0.188965	0.183733	0.180954	0.124639	0.111608	0.117405	0.113463	0.101508	0.114784	0.122822	0.10497	0.121214	0.076906	0.069666	0.076755	0.06854	0.061571	0.071827
K8prLightR	0.174606	0.158536	0.178689	0.059383	0.060888	0.066026	0.038751	0.038809	0.041975	0.040269	0.035747	0.041978	0.045078	0.038993	0.046498	0.022492	0.020554	0.022177	0.025648	0.021209	0.022487
K12prLightR	0.074249	0.067882	0.07142	0.046389	0.042653	0.038691	0.025209	0.021371	0.025531	0.022369	0.021322	0.02569	0.02635	0.030165	0.031339	0.022167	0.021223	0.025234	0.020157	0.018256	0.024049
K16prLightR	0.344623	0.360084	0.34505	0.084229	0.077425	0.079755	0.049592	0.044364	0.046681	0.046802	0.03831	0.044812	0.04541	0.032387	0.035226	0.029114	0.024181	0.028771	0.026502	0.024699	0.028491
K5prHeavyR	0	0	0	0.286426	0.297017	0.29013	0.387278	0.396854	0.381628	0.399325	0.4135	0.39029	0.39646	0.406311	0.396	0.432576	0.439155	0.421753	0.412191	0.426541	0.412956
K8prHeavyR	0	0	0	0.111741	0.115863	0.140099	0.137265	0.160399	0.153717	0.168819	0.168722	0.160791	0.150404	0.157546	0.139586	0.141937	0.144317	0.135587	0.17965	0.177669	0.185132
K12prHeavyR	0	0	0	0.060754	0.058241	0.054699	0.065714	0.06469	0.050462	0.086544	0.067037	0.055729	0.086352	0.081679	0.078999	0.096523	0.09333	0.071791	0.090301	0.086036	0.065396
K16prHeavyR	0	0	0	0.162114	0.164181	0.149645	0.171552	0.161905	0.1826	0.12241	0.153854	0.165925	0.127122	0.147949	0.151138	0.178286	0.187574	0.217932	0.177011	0.184018	0.189662
H4K5K8K12K16-4ac
LightR	1	0.999609	1	0.41078	0.386678	0.388416	0.234238	0.214498	0.232781	0.215787	0.188101	0.222542	0.230676	0.196507	0.238437	0.145559	0.133063	0.142146	0.135205	0.121523	0.139207
HeavyR	0	0.000391	0	0.58922	0.613322	0.611584	0.765762	0.785502	0.767219	0.784213	0.811899	0.777458	0.769324	0.803493	0.761563	0.854441	0.866937	0.857854	0.864795	0.878477	0.860793
H4K20un
LightR	1	1	1	0.062912	0.056878	0.064349	0.118685	0.104156	0.120731	0.215995	0.180355	0.211158	0.245558	0.207591	0.247454	0.124925	0.10633	0.127623	0.136855	0.118976	0.141701
HeavyR	0	0	0	0.937088	0.943122	0.935651	0.881315	0.895844	0.879269	0.784005	0.819645	0.788842	0.754442	0.792409	0.752546	0.875075	0.89367	0.872377	0.863145	0.881024	0.858299
H4K20me1
LightR	1	1	1	0.339036	0.321892	0.33075	0.170133	0.155331	0.168442	0.199847	0.172685	0.197247	0.23675	0.199255	0.236625	0.144421	0.125018	0.143457	0.141334	0.141377	0.146461
HeavyR	0	0	0	0.660964	0.678108	0.66925	0.829867	0.844669	0.831558	0.800153	0.827315	0.802753	0.76325	0.800745	0.763375	0.855579	0.874982	0.856543	0.858666	0.858623	0.853539
H4K20me2
LightR	1	1	1	0.194067	0.192716	0.216057	0.052826	0.050285	0.067727	0.030984	0.029433	0.037262	0.029599	0.023114	0.025836	0.019253	0.016585	0.025314	0.016661	0.013834	0.019755
HeavyR	0	0	0	0.805933	0.807284	0.783943	0.947174	0.949715	0.932273	0.969016	0.970567	0.962738	0.970401	0.976886	0.974164	0.980747	0.983415	0.974686	0.983339	0.986166	0.980245
H4K20me3
LightR	1	1	1	0.880703	0.879186	0.88052	0.595743	0.580512	0.594233	0.413192	0.395293	0.413564	0.332431	0.303683	0.331543	0.252139	0.225136	0.243918	0.189899	0.179415	0.188973
HeavyR	0	0	0	0.119297	0.120814	0.11948	0.404257	0.419488	0.405767	0.586808	0.604707	0.586436	0.667569	0.696317	0.668457	0.747861	0.774864	0.756082	0.810101	0.820585	0.811027
H4K20ac
LightR	1	1	1	0.161998	0.11011	0.188324	0.016394	0.045837	0.022729	0.131722	0.091876	0.104674	0.045245	0.092991	0.093391	0.021644	0	0.015847	0.009377	0.007634	0
HeavyR	0	0	0	0.838002	0.88989	0.811676	0.983606	0.954163	0.977271	0.868278	0.908124	0.895326	0.954755	0.907009	0.906609	0.978356	0	0.984153	0.990623	0.992366	0
H4K44un
LightR	1	1	1	0.545564	0.535906	0.53909	0.30031	0.282017	0.29002	0.198204	0.179188	0.204165	0.16947	0.141213	0.168829	0.088787	0.074128	0.086563	0.05356	0.053299	0.058679
HeavyR	0	0	0	0.454436	0.464094	0.46091	0.69969	0.717983	0.70998	0.801796	0.820812	0.795835	0.83053	0.858787	0.831171	0.911213	0.925872	0.913437	0.94644	0.946701	0.941321
H4K44ac
LightR	1	0.998248	1	0.54275	0.529081	0.498154	0.158145	0.266278	0.142757	0.124713	0.036907	0.120021	0.112179	0.002829	0.081795	0.067773	0	0.001652	0.006137	1	1
HeavyR	0	0.001752	0	0.45725	0.470919	0.501846	0.841855	0.733722	0.857243	0.875287	0.963093	0.879979	0.887821	0.997171	0.918205	0.932227	0	0.998348	0.993863	0	0
