# Supplementary material for: Multi-omic profiling of histone variant H3.3 lysine 27 methylation reveals a distinct role from canonical H3 in stem cell differentiation
Source: Royal Society of Chemistry journal article supplement (doi:10.1039/d1mo00352f), 2022-01-12
Supplement: d1mo00352f5.xlsx [file d1mo00352f5.xlsx]

## Sheet: report_full_D6_v_D0_h33k27me3_a
seqnames	start	end	width	strand	Conc	Conc_d0	Conc_d6	Fold	p.value	FDR	S01	S02	S09	S10	annotation	geneChr	geneStart	geneEnd	geneLength	geneStrand	geneId	transcriptId	distanceToTSS	ENSEMBL	SYMBOL	GENENAME	flank_txIds	flank_geneIds	flank_gene_distances
chr11	96246316	96412324	166009	*	11.74	12.31	10.76	1.55	2.08e-256	2.73e-252	5203.13	4978.09	1771	1706.53	Promoter (<=1kb)	11	96351632	96354016	2385	1	103889	uc007lby.2	0	ENSMUSG00000075588	Hoxb2	homeobox B2	uc007lby.2;uc007lbz.2;uc007lbw.1;uc007lbx.1;uc007lbv.2;uc007lbu.2;uc007lbt.1;uc007lbr.1;uc007lbp.1;uc007lbq.1;uc007lbn.2;uc007lbo.2;uc007lbm.2;uc029rnt.1;uc011ydf.1;uc011ydg.1;uc007lbs.2	103889;15407;15410;15410;15412;15413;15414;15415;15416;15416;15417;15417;193022;193022;387191;723893;75395	0;0;0;0;0;0;0;0;0;0;0;0;0;0;0;0;0
chr6	52141646	52330135	188490	*	12.09	12.59	11.31	1.28	5.59e-219	3.67e-215	6257.08	6083.79	2624	2456.09	Promoter (<=1kb)	6	52172881	52174055	1175	1	100504154	uc009byc.2	0	ENSMUSG00000087626	Gm15050	predicted gene 15050	uc009byc.2;uc029vvk.2;uc057adg.2;uc057adf.1;uc057bxe.1;uc057bxd.1;uc009byv.1;uc009bxx.2;uc009bxy.1;uc009bym.1;uc012ema.1;uc009byn.2;uc009byo.2;uc009byp.2;uc009byq.5;uc009byr.2;uc029vvl.1;uc009bxz.2;uc009bya.2;uc009byf.1;uc009byh.1;uc009byi.1;uc009byj.2;uc009byk.2;uc009byl.2;uc033irv.1;uc009byu.1;uc012elz.1;uc009bye.2;uc009byg.2;uc009byt.2;uc033irw.1	100504154;100736249;105242657;105242658;105242658;106007488;14028;15394;15394;15395;15395;15396;15397;15397;15397;15397;15398;15399;15400;15401;15402;15403;15404;15404;15405;15405;70593;723820;72628;72628;791364;791364	0;0;0;0;0;0;0;0;0;0;0;0;0;0;0;0;0;0;0;0;0;0;0;0;0;0;0;0;0;0;0;0
chr15	102883666	103070907	187242	*	12.03	12.46	11.41	1.05	2.28e-136	9.98e-133	5752.66	5520.59	2826	2634.13	Promoter (<=1kb)	15	102944062	102947946	3885	2	100503872	uc007xwx.3	0	ENSMUSG00000086903	Hotair	HOX transcript antisense RNA (non-protein coding)	uc007xwx.3;uc007xwy.1;uc007xww.1;uc007xwv.1;uc007xxf.1;uc007xxg.1;uc007xxe.1;uc007xxc.1;uc007xxd.1;uc012aaf.1;uc007xxa.1;uc007xwz.3;uc012aae.1;uc012aag.1	100503872;109663;15421;15422;15423;15423;15424;15425;15425;15426;15427;209448;723958;751557	0;0;0;0;0;0;0;0;0;0;0;0;0;0
chr2	74644264	74779337	135074	*	11.66	12.11	11.02	1.08	5.26e-132	1.73e-128	4415.25	4403.93	2145	2020.77	Promoter (<=1kb)	2	74752684	74753742	1059	1	102634401	uc008keh.2	0	ENSMUSG00000085015	Gm14424	predicted gene 14424	uc008keh.2;uc033hnp.1;uc008kdt.2;uc008kei.1;uc008kdx.3;uc033hno.1;uc008kdw.2;uc008kdv.2;uc008kdu.2;uc008kee.1;uc008keg.1;uc057ldm.1;uc008kef.2;uc056zni.2;uc008kea.3;uc008keb.3;uc008kdz.1;uc012bxl.1;uc008kec.1;uc008ked.2	102634401;102634678;14029;15429;15430;15431;15431;15432;15433;15434;15434;15434;15436;15437;15437;15437;15438;387144;73429;73429	0;0;0;0;0;0;0;0;0;0;0;0;0;0;0;0;0;0;0;0
chr2	33522451	33662927	140477	*	11.23	11.63	10.67	0.95	6.72e-77	1.77e-73	3182.13	3150.27	1574	1693.18	Promoter (<=1kb)	2	33641193	33645663	4471	1	100504399	uc008jhz.1	0	NA	C130021I20Rik	Riken cDNA C130021I20 gene	uc008jhz.1;uc008jia.1;uc008jhy.2	100504399;100504399;16917	0;0;0
chr7	143304926	143473036	168111	*	11.4	11.77	10.91	0.86	2.37e-67	5.19e-64	3483.79	3487.58	1847	2005.64	Promoter (<=1kb)	7	143458339	143461050	2712	2	12577	uc009kpd.2	0	ENSMUSG00000037664	Cdkn1c	cyclin-dependent kinase inhibitor 1C (P57)	uc009kpd.2;uc009kpe.2;uc009kpf.3;uc009kpb.1;uc012fxu.1;uc009kpg.2;uc009kph.2;uc009kpi.2;uc029wqb.1	12577;12577;12577;16535;16535;18400;18400;18400;71153	0;0;0;0;0;-719;-719;-2080;0
chr9	123923176	123942127	18952	*	10.67	11.12	10.02	1.1	1.87e-66	3.51e-63	2311.08	2126.77	1028	1041.54	Distal Intergenic	9	123962126	123968692	6567	2	12768	uc009sgy.2	26565	ENSMUSG00000025804	Ccr1	chemokine (C-C motif) receptor 1	NA	NA	NA
chr7	70314355	70381013	66659	*	10.29	10.78	9.55	1.23	9.01e-66	1.48e-62	1828.17	1684.73	762	735.31	Promoter (<=1kb)	7	70351950	70360593	8644	2	11819	uc009hni.1	0	ENSMUSG00000030551	Nr2f2	nuclear receptor subfamily 2, group F, member 2	uc009hni.1;uc009hnj.1;uc009hnk.2;uc009hnl.2;uc057ahu.1;uc009hnh.2	11819;11819;434198;434198;624549;624549	0;0;0;0;0;0
chr13	40695804	40766325	70522	*	10.41	10.82	9.83	1	1.23e-53	1.8e-50	1837.69	1787.02	910	907.12	Promoter (<=1kb)	13	40727808	40735162	7355	1	102633805	uc007qek.1	0	ENSMUSG00000097752	Gm26688	predicted gene, 26688	uc007qek.1;uc007qed.3;uc007qee.3;uc007qef.3;uc007qej.3;uc056ytm.1;uc007qeh.1;uc007qei.1;uc011yyq.1	102633805;21418;21418;21418;21418;21418;21418;21418;21418	0;0;0;0;0;0;0;0;0
chr5	33410558	33489008	78451	*	10.47	10.87	9.91	0.96	2.66e-51	3.5e-48	1848.86	1899.05	943	981.01	Promoter (<=1kb)	5	33430734	33434090	3357	2	672284	uc056zzg.1	0	ENSMUSG00000029112	Nkx1-1	NK1 homeobox 1	uc056zzg.1;uc008xar.1;uc012duq.1;uc008xas.2;uc012dur.1	672284;71101;71101;71101;71101	0;32007;0;0;0
chr11	119033499	119064373	30875	*	9.57	10.05	8.84	1.21	1.47e-44	1.76e-41	1087.47	1038.73	453	462.91	Promoter (<=1kb)	11	119038436	119040913	2478	2	30951	uc007mpu.1	0	ENSMUSG00000025578	Cbx8	chromobox 8	uc007mpt.2;uc007mpu.1	12416;30951	10478;0
chr11	96146728	96219555	72828	*	10.45	10.83	9.94	0.89	2.42e-43	2.65e-40	1815.76	1824.16	944	1014.84	Promoter (<=1kb)	11	96194361	96196599	2239	1	15408	uc007lbk.1	0	ENSMUSG00000049604	Hoxb13	homeobox B13	uc007lbk.1;uc011ydd.1;uc011yde.2;uc033fzl.1;uc007lbl.2	15408;237930;237930;237930;432593	0;0;0;0;0
chr2	18017995	18053555	35561	*	9.43	9.93	8.68	1.25	3.11e-43	3.14e-40	988.98	957.14	406	413.95	Promoter (<=1kb)	2	18027249	18030577	3329	1	100034739	uc008ilk.2	0	NA	Gm17762	predicted gene, 17762	uc008ilk.2;uc033hln.1;uc008ilm.2;uc008iln.1;uc008ill.1;uc008ilj.3;uc012brc.1	100034739;102466840;17354;17354;72668;77940;77940	0;-4291;-1682;-2173;0;0;0
chr5	120813894	120846890	32997	*	9.15	9.68	8.3	1.39	8.47e-42	7.94e-39	832.57	812.23	296	332.94	Promoter (<=1kb)	5	120814417	120821426	7010	1	23961	uc008zif.1	0	ENSMUSG00000029605	Oas1b	2'-5' oligoadenylate synthetase 1B	uc008zid.1;uc057lnu.1;uc008zif.1;uc008zig.2	114643;23961;23961;243262	-1380;0;0;-477
chr13	56199015	56273661	74647	*	10.43	10.8	9.94	0.86	1.53e-41	1.34e-38	1788.45	1768.15	972	991.69	Promoter (<=1kb)	13	56250492	56252163	1672	2	18014	uc007qsl.3	0	ENSMUSG00000048904	Neurog1	neurogenin 1	uc007qsl.3;uc056ytv.1	18014;75245	0;0
chr14	122430703	122502032	71330	*	10.57	10.93	10.11	0.82	1.75e-41	1.43e-38	1937	1955.68	1090	1118.99	Promoter (<=1kb)	14	122475384	122480328	4945	1	22772	uc007vbd.1	0	ENSMUSG00000061524	Zic2	zinc finger protein of the cerebellum 2	uc007vbd.1;uc011zqj.1;uc007vba.2;uc007vbb.2;uc007vbc.1	22772;328479;328479;65100;69248	0;0;0;0;0
chr7	73355981	73411508	55528	*	9.91	10.33	9.32	1.01	9.9e-40	7.65e-37	1312.99	1262.18	641	640.95	Promoter (<=1kb)	7	73375520	73419899	44380	1	244058	uc009hqz.2	0	ENSMUSG00000070509	Rgma	repulsive guidance molecule family member A	uc009hqz.2;uc009hra.2;uc009hrb.2;uc009hqy.2;uc029wjt.1	244058;244058;244058;319783;319783	0;0;0;0;0
chr8	121029720	121148428	118709	*	11.25	11.53	10.91	0.63	1.38e-38	1.01e-35	2949.16	2984.66	1898	1942.44	Promoter (<=1kb)	8	121116171	121118895	2725	1	14234	uc012glx.2	0	ENSMUSG00000046714	Foxc2	forkhead box C2	uc012glx.2;uc009nrs.1;uc009nrn.2;uc009nro.1;uc009nrp.2;uc029wwp.1;uc009nrl.2;uc033jif.2;uc009nrm.2	14234;14241;15227;234814;234814;234814;68790;68790;68790	0;0;0;0;0;0;0;0;0
chr2	9868678	9898414	29737	*	9.3	9.79	8.53	1.26	1.58e-38	1.09e-35	926.09	849.37	369	370.33	Promoter (<=1kb)	2	9857078	9878600	21523	2	14462	uc008ihe.1	0	ENSMUSG00000015619	Gata3	GATA binding protein 3	uc008ihe.1;uc008ihf.1;uc008ihg.1;uc008ihh.2;uc008ihi.1	14462;14462;14462;381347;77682	0;0;0;0;0
chr8	84690633	84831816	141184	*	11.57	11.84	11.24	0.61	3.56e-38	2.33e-35	3725.45	3614.84	2323	2501.49	Promoter (<=1kb)	8	84701457	84704716	3260	1	17095	uc009mnb.1	0	ENSMUSG00000034041	Lyl1	lymphoblastomic leukemia 1	uc009mnj.1;uc009mnb.1;uc009mnc.2;uc009mnd.2;uc009mne.2;uc009mnf.2;uc009mnk.2;uc009mnl.2;uc009mnm.2;uc009mnn.2;uc009mno.2;uc009mmw.5;uc009mmv.2;uc009mmx.2;uc009mmy.2;uc009mmz.1;uc009mna.1;uc009mnh.1;uc009mni.2;uc009mmu.2	102060;17095;18032;18032;18032;18032;19358;19358;19358;19358;19358;212528;212528;212528;212528;212528;212528;23863;23863;66830	-466;0;0;0;0;0;0;0;0;0;0;0;0;0;0;0;0;0;0;0
chr11	98304382	98356786	52405	*	9.84	10.25	9.25	1	2.32e-37	1.44e-34	1235.61	1202.51	598	622.26	Promoter (<=1kb)	11	98325417	98329645	4229	2	18013	uc009vai.1	0	ENSMUSG00000038255	Neurod2	neurogenic differentiation 2	uc009vai.1;uc007lfz.2;uc007lga.2;uc057azx.1;uc007lgb.2;uc007lgc.2;uc007lgd.2;uc007lge.2;uc029rnx.1	18013;19049;19049;19049;19049;59045;59045;59045;69338	0;0;0;0;0;-1582;-1582;-1582;0
chr3	129189933	129232060	42128	*	9.81	10.24	9.19	1.05	2.42e-37	1.44e-34	1245.13	1177.55	615	554.6	Promoter (<=1kb)	3	129199878	129219594	19717	1	18741	uc008rhu.2	0	ENSMUSG00000028023	Pitx2	paired-like homeodomain transcription factor 2	uc008rhu.2;uc008rhv.2;uc012cxo.2;uc008rhw.2;uc008rhx.2	18741;18741;18741;18741;18741	0;0;0;0;0
chr14	21976196	22021830	45635	*	9.7	10.13	9.1	1.02	2.49e-36	1.42e-33	1106.92	1128.23	555	544.81	Promoter (<=1kb)	14	21983962	21989601	5640	2	218820	uc007slv.1	0	ENSMUSG00000039081	Zfp503	zinc finger protein 503	uc007slv.1;uc007slz.2	218820;76633	0;0
chr15	98764811	98811585	46775	*	9.89	10.29	9.34	0.95	3.37e-36	1.84e-33	1260.44	1247.57	641	653.41	Promoter (<=1kb)	15	98803782	98807925	4144	2	13199	uc007xny.1	0	ENSMUSG00000059213	Ddn	dendrin	uc007xnp.1;uc007xny.1;uc007xoa.1;uc007xnx.1;uc007xns.2;uc007xnt.2;uc007xnu.2;uc007xnv.2;uc007xnw.2	11842;13199;19082;22408;22410;22410;22410;22410;22410	-1693;0;19923;0;0;0;0;0;0
chr11	77924007	77976628	52622	*	9.81	10.21	9.24	0.97	9.95e-36	5.23e-33	1188.44	1186.68	604	605.34	Promoter (<=1kb)	11	77930839	77964091	33253	1	20370	uc007khn.2	0	ENSMUSG00000000632	Sez6	seizure related gene 6	uc007khn.2;uc007kho.2;uc007khp.2;uc011yaa.2;uc011xzz.1	20370;20370;20370;20370;791423	0;0;0;0;0
chr8	57221794	57390714	168921	*	12.01	12.22	11.75	0.47	5.29e-34	2.67e-31	4869.61	4690.1	3482	3423.74	Promoter (<=1kb)	8	57304414	57320859	16446	2	102636514	uc033jfq.1	0	ENSMUSG00000100510	AV026068	expressed sequence AV026068	uc033jfq.1;uc009lss.2;uc057alk.1	102636514;15111;75996	0;0;0
chr5	139526491	139566792	40302	*	9.64	10.05	9.06	0.99	2.36e-33	1.15e-30	1063.05	1059.43	531	534.13	Promoter (<=1kb)	5	139543898	139545268	1371	1	22255	uc009agu.1	0	ENSMUSG00000029546	Uncx	UNC homeobox	uc009agu.1;uc009agv.2;uc029vpu.1	22255;22255;74973	0;0;0
chr15	93501803	93547085	45283	*	9.64	10.05	9.06	0.99	3.11e-33	1.46e-30	1072.57	1050.29	533	532.35	Promoter (<=1kb)	15	93499114	93519436	20323	2	106042	uc007xja.1	0	ENSMUSG00000036158	Prickle1	prickle planar cell polarity protein 1	uc007xja.1;uc007xjb.1;uc007xjc.2;uc007xjd.1	106042;106042;106042;106042	0;0;0;0
chr18	37705042	37779234	74193	*	10.82	11.13	10.43	0.69	5.37e-33	2.43e-30	2232.04	2239.41	1439	1323.74	Promoter (<=1kb)	18	37720554	37841873	121320	1	93701	uc008equ.2	0	ENSMUSG00000103585	Pcdhgb4	protocadherin gamma subfamily B, 4	uc008eoy.3;uc056zgg.2;uc056zgh.2;uc008eqo.2;uc008eqq.2;uc008equ.2;uc008eqw.2;uc008eqy.2;uc008era.2;uc029tmk.2;uc008eql.2;uc008eqm.2;uc008eqn.2;uc008eqp.2;uc008eqr.2;uc008eqs.2;uc008eqt.2;uc008eqv.2;uc008eqx.2;uc008eqz.2;uc008erb.2;uc008erd.2	100384868;103611158;103611159;93699;93700;93701;93702;93703;93704;93705;93709;93710;93711;93712;93713;93714;93715;93716;93717;93722;93723;93724	0;0;0;0;0;0;0;0;0;0;0;0;0;0;0;0;0;0;0;0;0;0
chr19	44721124	44768157	47034	*	9.85	10.25	9.31	0.93	7.63e-33	3.34e-30	1247.2	1181.81	643	628.49	Promoter (<=1kb)	19	44757394	44837871	80478	1	18504	uc008hqa.3	0	ENSMUSG00000004231	Pax2	paired box 2	uc008hqa.3	18504	0
chr4	139812509	139852630	40122	*	9.65	10.06	9.07	0.99	2.3e-32	9.76e-30	1067.19	1065.52	522	554.6	Promoter (<=1kb)	4	139738081	139832968	94888	2	18509	uc008vms.1	0	ENSMUSG00000028736	Pax7	paired box 7	uc008vms.1	18509	0
chr11	119069216	119098679	29464	*	9.05	9.53	8.34	1.2	8.07e-32	3.31e-29	747.32	732.47	321	324.93	Promoter (<=1kb)	11	119077571	119082656	5086	2	12418	uc007mpv.2	0	ENSMUSG00000039989	Cbx4	chromobox 4	uc007mpv.2;uc007mpw.2;uc007mpx.2	12418;12418;12418	0;0;0
chr2	38330657	38379882	49226	*	10.01	10.37	9.51	0.86	1.16e-31	4.61e-29	1315.47	1339.51	751	707.72	Promoter (<=1kb)	2	38339281	38369737	30457	1	16870	uc008jnk.2	0	ENSMUSG00000000247	Lhx2	LIM homeobox protein 2	uc008jnk.2;uc008jnl.2	16870;16870	0;0
chr7	79480205	79521701	41497	*	9.59	10	9.02	0.98	9.19e-31	3.55e-28	1031.61	1014.98	503	535.02	Promoter (<=1kb)	7	79500026	79534403	34378	1	101694	uc009hyl.2	0	ENSMUSG00000097023	Mir9-3hg	Mir9-3 host gene	uc009hyl.2;uc029wme.1;uc029wmf.1;uc009hym.2;uc029wmg.1;uc012fnh.1	101694;101694;101694;101694;101694;723968	0;0;0;0;0;0
chr10	80486011	80519213	33203	*	9.16	9.61	8.48	1.13	1.23e-30	4.62e-28	775.46	789.7	357	358.75	Promoter (<=1kb)	10	80494906	80517266	22361	1	246086	uc007gdn.2	0	ENSMUSG00000045518	Onecut3	one cut domain, family member 3	uc007gdn.2;uc007gdo.1;uc011xis.1	246086;67331;67331	0;19911;19911
chr2	18645660	18710543	64884	*	10.47	10.78	10.06	0.73	2.17e-30	7.91e-28	1790.1	1738.31	1093	1037.98	Promoter (<=1kb)	2	18677018	18686629	9612	1	12151	uc008ily.1	0	ENSMUSG00000026739	Bmi1	Bmi1 polycomb ring finger oncogene	uc008ily.1;uc008ilz.1;uc008ilx.1;uc008ima.1	12151;12151;12238;381350	0;0;0;0
chr10	42558903	42617900	58998	*	10.23	10.57	9.79	0.78	3.1e-30	1.1e-27	1538.92	1497.81	906	859.94	Promoter (<=1kb)	10	42561971	42568819	6849	2	21907	uc007eys.1	0	ENSMUSG00000019803	Nr2e1	nuclear receptor subfamily 2, group E, member 1	uc007eys.1;uc007eyt.1	21907;21907	0;0
chr9	91339875	91427100	87226	*	10.75	11.04	10.38	0.65	6.15e-30	2.12e-27	2128.59	2070.14	1356	1315.73	Promoter (<=1kb)	9	91360345	91365774	5430	2	22771	uc009raf.1	0	ENSMUSG00000032368	Zic1	zinc finger protein of the cerebellum 1	uc009raf.1;uc009rag.1;uc009rah.1;uc009rai.1;uc009rak.1;uc009ral.1	22771;22771;22774;22774;22774;22774	0;0;0;0;0;0
chr2	71514961	71557005	42045	*	9.9	10.26	9.4	0.86	7.1e-30	2.39e-27	1233.54	1223.21	690	664.1	Promoter (<=1kb)	2	71530638	71537891	7254	2	111970	uc008kaw.2	0	NA	Dlx1as	distal-less homeobox 1, antisense	uc008kaw.2;uc008kau.2;uc008kav.1;uc008kax.2;uc008kas.1	111970;13390;13390;13392;66559	0;0;0;0;0
chr8	12371689	12411535	39847	*	9.6	10	9.05	0.95	1.04e-29	3.43e-27	1030.78	1012.54	524	535.02	Promoter (<=1kb)	8	12395519	12399555	4037	1	20664	uc009kwa.2	0	ENSMUSG00000096014	Sox1	SRY (sex determining region Y)-box 1	uc009kwa.2;uc012fzm.1	20664;434280	0;0
chr11	85823906	85850486	26581	*	9	9.47	8.3	1.17	1.1e-28	3.54e-26	732.01	686.8	324	307.12	Promoter (<=1kb)	11	85832615	85841948	9334	1	21385	uc007ksb.1	0	ENSMUSG00000000093	Tbx2	T-box 2	uc007krq.2;uc007krr.2;uc007krs.2;uc007krt.3;uc007kru.2;uc007ksa.3;uc007ksb.1;uc007krx.2;uc007kry.2	192197;192197;192197;192197;192197;192197;21385;69909;69909	0;0;0;0;0;0;0;0;0
chr7	131539853	131559371	19519	*	8.96	9.42	8.27	1.15	8.24e-28	2.57e-25	674.5	694.72	313	303.56	Promoter (<=1kb)	7	131548773	131556582	7810	1	15372	uc057lvl.1	0	ENSMUSG00000050100	Hmx2	H6 homeobox 2	uc009kbq.2;uc057cbe.1;uc057lvl.1;uc009kbp.1;uc009kbo.3	12237;12237;15372;15372;15373	-999;-1123;0;0;0
chr17	36059014	36138936	79923	*	10.96	11.22	10.65	0.57	1.37e-27	4.18e-25	2398.39	2369.1	1605	1598.82	Promoter (<=1kb)	17	36080189	36084249	4061	2	14963	uc008ckb.2	0	ENSMUSG00000073406	H2-Bl	histocompatibility 2, blastocyst	uc008cjz.2;uc008ckb.2;uc008ckc.2;uc008ckd.2;uc012asc.1;uc012asd.1;uc012ase.1;uc012asf.1;uc012asg.1;uc012asi.2;uc057kxu.1;uc029thl.2;uc008cjx.3;uc008cjy.1;uc012asl.1;uc033hdp.1	100529082;14963;14963;14963;14963;14963;14963;14963;14963;15024;15024;15040;15051;547347;630294;667803	-643;0;0;0;0;0;0;0;0;0;0;0;0;16053;0;0
chr19	37679047	37710221	31175	*	9.12	9.57	8.47	1.1	2.46e-27	7.35e-25	754.77	766.56	333	375.67	Promoter (<=1kb)	19	37697808	37701536	3729	1	13082	uc008his.2	0	ENSMUSG00000024987	Cyp26a1	cytochrome P450, family 26, subfamily a, polypeptide 1	uc008hiq.2;uc008his.2;uc012ble.1	107371;13082;546726	0;0;0
chr2	105638248	105697348	59101	*	10.05	10.38	9.61	0.77	4.77e-27	1.39e-24	1320.85	1348.03	789	772.7	Promoter (<=1kb)	2	105657862	105661343	3482	2	103164605	uc056zoc.1	0	ENSMUSG00000102424	Paupar	Pax6 upstream antisense RNA	uc056zoc.1;uc008lku.3;uc008lkv.3;uc012cat.3;uc008lky.3;uc057bnv.1;uc057bnw.1;uc008lla.3;uc008llb.3;uc057bnx.1;uc057bny.1;uc008llc.3;uc008lkt.1;uc012caq.1;uc012car.1;uc012cas.1;uc008lld.2	103164605;18508;18508;18508;18508;18508;18508;18508;18508;18508;18508;18508;402728;402728;402728;402728;77766	0;0;0;0;0;0;0;0;0;0;0;0;0;0;0;0;0
chr2	116049593	116089703	40111	*	9.43	9.84	8.86	0.98	6.57e-27	1.87e-24	938.91	890.16	484	442.43	Promoter (<=1kb)	2	115861264	116064621	203358	2	17536	uc008lqt.2	0	ENSMUSG00000027210	Meis2	Meis homeobox 2	uc008lqt.2;uc008lqu.2;uc008lqv.2;uc008lqw.2;uc008lqx.2;uc008lqy.2;uc008lqz.2;uc008lra.2;uc008lrb.1;uc008lrc.1;uc012cbg.1	17536;17536;17536;17536;17536;17536;17536;17536;654793;654793;69974	0;0;0;0;0;0;0;0;0;0;0
chr1	74764393	74812091	47699	*	9.74	10.11	9.25	0.86	3.37e-26	9.43e-24	1136.3	1071	605	613.35	Promoter (<=1kb)	1	74792019	74804176	12158	1	22409	uc007bnf.3	0	ENSMUSG00000026167	Wnt10a	wingless-type MMTV integration site family, member 10A	uc007bnf.3;uc007bne.1	22409;22420	0;0
chr18	34536980	34565504	28525	*	8.91	9.38	8.23	1.15	4.43e-26	1.21e-23	677.39	651.49	285	315.13	Promoter (<=1kb)	18	34542328	34548061	5734	1	20890	uc008ekq.2	0	ENSMUSG00000012282	Wnt8a	wingless-type MMTV integration site family, member 8A	uc008ekq.2;uc008ekr.1;uc008eks.1;uc008ekt.1	20890;75533;75533;75533	0;0;0;0
chr6	6820986	6899653	78668	*	10.59	10.88	10.22	0.65	7.28e-26	1.95e-23	1936.17	1819.9	1186	1202.67	Promoter (<=1kb)	6	6877801	6882068	4268	2	13395	uc009awy.2	0	ENSMUSG00000029755	Dlx5	distal-less homeobox 5	uc009awy.2;uc009awz.2;uc009aww.1;uc009awx.2;uc009awt.1;uc009awu.1	13395;13395;13396;13397;320038;320038	0;0;0;0;0;0
chr9	63116574	63155860	39287	*	9.62	10	9.11	0.88	1.7e-25	4.47e-23	1048.57	994.89	537	569.73	Promoter (<=1kb)	9	63138164	63146980	8817	2	207667	uc009qat.2	0	ENSMUSG00000022245	Skor1	SKI family transcriptional corepressor 1	uc009qat.2;uc009qau.2;uc012guu.1;uc009qav.2	207667;207667;207667;207667	0;0;0;0
chr4	136127334	136149075	21742	*	8.45	8.96	7.64	1.32	1.74e-25	4.49e-23	499.46	497.44	196	202.08	Promoter (<=1kb)	4	136143822	136145392	1571	1	15903	uc012dnf.1	0	ENSMUSG00000007872	Id3	inhibitor of DNA binding 3	uc012dnf.1	15903	0
chr7	79527321	79560695	33375	*	9.35	9.76	8.79	0.97	2.11e-25	5.33e-23	878.5	850.59	423	461.13	Exon (uc009hyl.2/101694, exon 3 of 3)	7	79500026	79534403	34378	1	101694	uc009hyl.2	27295	ENSMUSG00000097023	Mir9-3hg	Mir9-3 host gene	uc009hyl.2;uc029wme.1;uc029wmf.1;uc009hym.2;uc029wmg.1	101694;101694;101694;101694;101694	0;0;0;0;0
chr19	45219392	45250330	30939	*	9.28	9.68	8.72	0.96	4.9e-25	1.21e-22	827.19	816.49	418	425.52	Promoter (<=1kb)	19	45233728	45235236	1509	2	16814	uc008hqv.1	0	ENSMUSG00000025216	Lbx1	ladybird homeobox 1	uc008hqv.1	16814	0
chr5	120407487	120443769	36283	*	9.44	9.83	8.9	0.93	6.26e-25	1.52e-22	924.43	893.21	461	495.85	Promoter (<=1kb)	5	120431886	120441457	9572	1	16873	uc012ecn.1	0	ENSMUSG00000029595	Lhx5	LIM homeobox protein 5	uc012ecn.1	16873	0
chr11	11980841	12070045	89205	*	10.96	11.22	10.63	0.6	1.48e-24	3.53e-22	2461.29	2325.26	1653	1506.23	Promoter (<=1kb)	11	11930499	12027971	97473	2	14783	uc007iaz.2	0	ENSMUSG00000020176	Grb10	growth factor receptor bound protein 10	uc007iaz.2;uc007iba.2;uc007ibb.2;uc007ibc.1	14783;14783;14783;14783	0;0;0;0
chr5	37815268	37837659	22392	*	8.95	9.4	8.31	1.08	1.87e-24	4.39e-22	697.25	651.49	313	323.15	Promoter (<=1kb)	5	37820491	37824585	4095	2	17701	uc008xfw.1	0	ENSMUSG00000048450	Msx1	msh homeobox 1	uc008xfw.1;uc012dvm.1	17701;93895	0;0
chr18	11043198	11063905	20708	*	8.69	9.15	7.99	1.17	1.12e-23	2.59e-21	583.46	555.89	247	259.94	Promoter (<=1kb)	18	11052510	11057583	5074	1	14465	uc008ebj.1	0	ENSMUSG00000005836	Gata6	GATA binding protein 6	uc008ebj.1;uc008ebk.1;uc033hfu.1;uc008ebh.4;uc008ebi.2	14465;14465;68434;68434;68434	0;0;0;0;0
chr8	70469889	70528907	59019	*	10.27	10.57	9.9	0.67	2.39e-23	5.42e-21	1526.51	1508.77	924	981.9	Promoter (<=1kb)	8	70493131	70504081	10951	1	12931	uc009maj.2	0	ENSMUSG00000007888	Crlf1	cytokine receptor-like factor 1	uc009maj.2;uc009mak.1;uc009mao.2;uc009map.2;uc009maq.2;uc009mar.2;uc009mas.2;uc009mam.1;uc029wts.1;uc009maf.1;uc009mah.2;uc012gfb.1;uc009mal.1;uc009mai.2;uc009man.2	12931;12931;14232;14232;14232;14232;14232;22186;234378;234378;234378;234378;66462;67937;75620	0;0;0;0;0;0;0;0;0;0;0;0;0;0;0
chr13	51835610	51869958	34349	*	9.09	9.51	8.52	0.99	2.44e-23	5.43e-21	730.77	722.72	368	365.88	Promoter (<=1kb)	13	51846675	51848475	1801	1	23882	uc007qmq.3	0	ENSMUSG00000021453	Gadd45g	growth arrest and DNA-damage-inducible 45 gamma	uc007qmq.3	23882	0
chr9	119561566	119588829	27264	*	8.84	9.28	8.2	1.08	2.89e-23	6.33e-21	628.15	619.22	290	300	Promoter (<=1kb)	9	119483408	119562678	79271	2	20271	uc009sbe.2	0	ENSMUSG00000032511	Scn5a	sodium channel, voltage-gated, type V, alpha	uc009sbe.2;uc009sbc.2	20271;20271	0;0
chr19	43594598	43625140	30543	*	9.5	9.88	8.98	0.9	3.9e-23	8.4e-21	962.91	927.91	542	470.92	Promoter (<=1kb)	19	43612325	43615892	3568	1	18089	uc008hok.1	0	ENSMUSG00000044220	Nkx2-3	NK2 homeobox 3	uc008hok.1	18089	0
chr2	119308959	119352806	43848	*	9.56	9.93	9.06	0.88	4.47e-23	9.47e-21	1024.16	931.57	544	521.66	Promoter (<=1kb)	2	119321199	119325574	4376	2	100043609	uc057bod.1	0	ENSMUSG00000074912	Gm14207	predicted gene 14207	uc057bod.1;uc057boe.2;uc008ltq.1;uc057bof.1;uc008ltr.2;uc008lts.4	100043609;100043609;100043609;100043609;54485;69065	0;0;0;0;0;0
chr7	130256198	130274428	18231	*	8.32	8.83	7.51	1.32	4.61e-23	9.61e-21	454.35	456.65	174	190.5	Promoter (<=1kb)	7	130162451	130262066	99616	2	14183	uc009jzr.1	0	ENSMUSG00000030849	Fgfr2	fibroblast growth factor receptor 2	uc009jzr.1;uc009jzs.1;uc012fuw.1;uc033jch.1;uc033jci.1;uc057lvj.1;uc009jzv.1;uc033jcj.1;uc033jck.1;uc009jzw.2;uc009jzx.2;uc009jzy.2;uc033jcl.1;uc012fux.2;uc012fuy.2;uc033jcm.1;uc009jzz.1	14183;14183;14183;14183;14183;14183;14183;14183;14183;14183;14183;14183;14183;14183;14183;14183;14183	0;0;0;0;0;0;0;0;0;0;0;0;0;0;0;0;0
chr4	114894020	114933430	39411	*	9.6	9.96	9.12	0.84	4.96e-23	1.02e-20	1009.67	982.71	580	535.91	Promoter (<=1kb)	4	114909289	114921118	11830	1	100040736	uc008ued.2	0	ENSMUSG00000085399	Foxd2os	forkhead box D2, opposite strand	uc008ued.2;uc008uee.2;uc012dix.1;uc008uef.1	100040736;100040736;17301;30923	0;0;0;0
chr2	147176815	147205962	29148	*	9.13	9.54	8.56	0.98	5.42e-23	1.09e-20	744.01	747.08	395	362.32	Promoter (<=1kb)	2	147184083	147331681	147599	1	100313531	uc012cfm.1	0	ENSMUSG00000086509	Nkx2-2os	NK2 homeobox 2, opposite strand	uc012cfm.1;uc008mst.1;uc008msu.1;uc033hqo.1	100313531;18088;18088;78068	0;0;0;0
chr5	28455474	28472898	17425	*	8.58	9.05	7.87	1.18	6.09e-23	1.21e-20	528.84	531.54	233	234.13	Promoter (<=1kb)	5	28456840	28467101	10262	2	20423	uc008wua.2	0	ENSMUSG00000002633	Shh	sonic hedgehog	uc008wua.2;uc008wub.1;uc012dts.1	20423;654796;654796	0;0;0
chr12	57533178	57555692	22515	*	8.93	9.36	8.32	1.04	6.62e-23	1.3e-20	667.05	646.62	321	319.59	Promoter (<=1kb)	12	57540631	57546121	5491	2	15375	uc007nps.2	0	ENSMUSG00000035451	Foxa1	forkhead box A1	uc007nps.2	15375	0
chr6	88185709	88217975	32267	*	9.18	9.58	8.63	0.95	7.14e-23	1.38e-20	777.12	755.6	402	392.58	Promoter (<=1kb)	6	88193891	88207032	13142	1	14461	uc009cvc.2	0	ENSMUSG00000015053	Gata2	GATA binding protein 2	uc009cvc.2;uc009cvd.2;uc009cve.1	14461;14461;56691	0;0;-4293
chr12	56498500	56542692	44193	*	9.9	10.22	9.48	0.74	1.17e-22	2.23e-20	1216.16	1170.85	709	719.29	Promoter (<=1kb)	12	56490428	56505685	15258	2	104798	uc007npd.2	0	ENSMUSG00000112343	Sfta3-ps	surfactant associated 3, pseudogene	uc007npd.2;uc007npe.2;uc056yqo.1;uc007npf.3;uc007npg.3	104798;104798;104798;21869;21869	0;0;0;0;0
chr19	45121224	45165768	44545	*	9.64	9.99	9.18	0.82	1.28e-22	2.39e-20	1006.36	1033.85	559	599.11	Promoter (<=1kb)	19	45150715	45156943	6229	1	21908	uc008hqu.1	0	ENSMUSG00000025215	Tlx1	T cell leukemia, homeobox 1	uc008hqu.1	21908	0
chr2	31628093	31659384	31292	*	9.31	9.7	8.79	0.91	1.67e-22	3.09e-20	852.84	807.36	450	434.42	Promoter (<=1kb)	2	31640037	31655795	15759	1	381359	uc012bto.1	0	ENSMUSG00000079466	Prdm12	PR domain containing 12	uc012bto.1	381359	0
chr18	82894634	82926649	32016	*	8.89	9.32	8.26	1.05	1.81e-22	3.29e-20	653.39	622.87	317	298.22	Promoter (<=1kb)	18	82910879	83005314	94436	1	329003	uc008fuf.2	0	ENSMUSG00000058881	Zfp516	zinc finger protein 516	uc008fuf.2;uc008fug.2;uc008fud.2;uc008fue.2	329003;329003;75853;75853	0;0;0;0
chr1	74874579	74906714	32136	*	9.15	9.55	8.6	0.95	2.41e-22	4.33e-20	758.08	738.55	378	396.14	Promoter (<=1kb)	1	74889934	74893143	3210	2	12958	uc007bni.2	0	ENSMUSG00000006546	Cryba2	crystallin, beta A2	uc007bni.2;uc007bnj.1;uc007bnh.2;uc011wnd.1;uc011wne.1	12958;241116;260298;260298;723900	0;0;0;0;0
chr7	73591019	73606104	15086	*	8.15	8.67	7.31	1.36	2.99e-22	5.31e-20	406.35	410.98	162	155.79	Distal Intergenic	7	73504988	73541746	36759	2	244059	uc012fmw.1	-49273	ENSMUSG00000078671	Chd2	chromodomain helicase DNA binding protein 2	NA	NA	NA
chr17	27287210	27419626	132417	*	11.48	11.7	11.23	0.48	3.85e-22	6.74e-20	3383.23	3287.27	2286	2503.27	Promoter (<=1kb)	17	27317035	27317095	61	2	102465700	uc008biu.3	0	ENSMUSG00000105142	Mir7214	microRNA 7214	uc008biu.3;uc029tft.2;uc033hci.1;uc033hch.1;uc008bow.2	102465700;102465701;102466228;102466818;268934	0;0;0;0;83907
chr5	28154357	28182704	28348	*	9.05	9.45	8.48	0.97	5.03e-22	8.7e-20	705.53	695.33	362	352.52	Promoter (<=1kb)	5	28165696	28172166	6471	1	13799	uc008wtv.1	0	ENSMUSG00000039095	En2	engrailed 2	uc008wtv.1	13799	0
chr2	118696638	118719963	23326	*	8.8	9.23	8.16	1.07	6.66e-22	1.14e-19	595.05	608.26	278	295.55	Promoter (<=1kb)	2	118710921	118714105	3185	2	18796	uc008lsj.1	0	ENSMUSG00000040061	Plcb2	phospholipase C, beta 2	uc008lsi.1;uc012cbj.1;uc008lsj.1;uc008lsk.1;uc008lsl.1;uc008lsf.2;uc008lsg.2;uc008lsh.1	18796;18796;18796;18796;18796;214230;214230;383787	0;0;0;0;0;0;0;0
chr6	84575094	84597907	22814	*	8.38	8.88	7.61	1.27	7.65e-22	1.29e-19	475.46	467	211	179.82	Promoter (<=1kb)	6	84571414	84588638	17225	2	232174	uc009coy.2	0	ENSMUSG00000063415	Cyp26b1	cytochrome P450, family 26, subfamily b, polypeptide 1	uc009coy.2;uc009coz.2;uc057lqs.1	232174;232174;232174	0;0;0
chr4	89265310	89314897	49588	*	9.87	10.2	9.46	0.74	8.99e-22	1.49e-19	1178.5	1166.59	730	674.78	Promoter (<=1kb)	4	89295180	89518621	223442	1	102633081	uc029uww.2	0	NA	Gm12610	predicted gene 12610	uc029uww.2;uc008toh.1;uc008toi.1;uc008tok.2	102633081;12578;12578;12579	0;0;0;0
chr13	78154177	78218019	63843	*	10.24	10.53	9.89	0.64	1.23e-21	2.01e-19	1484.3	1466.15	958	938.28	Promoter (<=1kb)	13	78188973	78196354	7382	2	13865	uc057kqk.1	0	ENSMUSG00000069171	Nr2f1	nuclear receptor subfamily 2, group F, member 1	uc057kqk.1;uc007rhe.2;uc029sch.1;uc007rgy.2;uc007rgz.2;uc007rha.2;uc011zcc.1	13865;13865;320174;68675;68675;68675;68675	0;0;0;0;0;0;0
chr8	27032092	27304366	272275	*	12.24	12.4	12.05	0.36	1.44e-21	2.33e-19	5381.48	5445.09	4102	4356.68	Promoter (<=1kb)	8	27042555	27049615	7061	1	114863	uc009lhs.1	0	ENSMUSG00000031485	Plpbp	pyridoxal phosphate binding protein	uc009lhs.1;uc009lht.1;uc009lhu.1;uc009lhv.1;uc009lhw.1;uc009lie.1;uc009lif.1;uc009lig.1;uc009lih.1;uc009lhr.3;uc009lhy.1;uc029wry.1;uc009liq.1;uc012gbs.1;uc009lhz.2;uc009lia.2;uc009lic.1;uc009lid.1;uc009lhx.2;uc012gbr.1	114863;114863;114863;114863;114863;11556;11556;11556;13685;244373;66653;71082;732482;75767;75767;75767;76615;76615;78560;78560	0;0;0;0;0;0;0;0;0;0;0;0;0;0;0;0;0;0;0;0
chr16	17794948	17817659	22712	*	8.88	9.3	8.27	1.03	1.67e-21	2.68e-19	632.29	630.18	298	321.37	Promoter (<=1kb)	16	17797282	17808290	11009	1	224024	uc007yme.1	0	ENSMUSG00000012017	Scarf2	scavenger receptor class F, member 2	uc007ymc.2;uc007yme.1;uc007ymd.2;uc007ymf.2	224023;224024;224024;224024	35327;0;0;0
chr11	84504236	84538269	34034	*	9.47	9.82	9	0.82	2.15e-21	3.4e-19	914.91	898.08	515	509.2	Promoter (<=1kb)	11	84519379	84525534	6156	2	16869	uc007kqo.1	0	ENSMUSG00000018698	Lhx1	LIM homeobox protein 1	uc007kqo.1;uc007kqm.1;uc007kqn.1;uc007kqp.2	16869;56321;56321;78365	0;0;0;0
chr1	78173592	78227179	53588	*	10.06	10.37	9.68	0.69	3.13e-21	4.89e-19	1360.99	1278.62	817	820.77	Promoter (<=1kb)	1	78101267	78197136	95870	2	18505	uc007bqb.2	0	ENSMUSG00000004872	Pax3	paired box 3	uc007bqb.2;uc007bqc.2;uc007bqd.1	18505;18505;18505	0;0;0
chr5	147297821	147322471	24651	*	9.02	9.42	8.45	0.97	4.59e-21	7.09e-19	701.81	669.75	360	341.84	Promoter (<=1kb)	5	147300900	147307249	6350	2	12591	uc009anz.1	0	ENSMUSG00000029646	Cdx2	caudal type homeobox 2	uc009anz.1;uc009aoa.2	12591;231903	0;0
chrY	90717408	90744602	27195	*	9.75	10.11	9.28	0.83	5.64e-21	8.61e-19	1183.06	1024.72	617	625.82	Distal Intergenic	21	90751140	90755050	3911	2	654820	uc057mdi.1	10448	ENSMUSG00000072844	G530011O06Rik	RIKEN cDNA G530011O06 gene	NA	NA	NA
chr2	148022234	148057098	34865	*	9.41	9.78	8.92	0.86	8.23e-21	1.24e-18	910.78	843.89	470	497.63	Promoter (<=1kb)	2	148042877	148045464	2588	2	15376	uc056zpw.1	0	ENSMUSG00000037025	Foxa2	forkhead box A2	uc056zpw.1;uc008mta.2;uc008mtb.2	15376;15376;15376	0;0;0
chr19	37869811	37896117	26307	*	8.89	9.31	8.3	1.01	9.02e-21	1.35e-18	642.63	627.74	298	331.16	Downstream (2-3kb)	19	37919343	37940018	20676	2	226101	uc008hiu.1	43901	ENSMUSG00000048612	Myof	myoferlin	uc008hit.1;uc012blf.1	226101;226101	147460;147460
chr7	62402726	62501209	98484	*	10.79	11.03	10.49	0.54	1.03e-20	1.52e-18	2083.07	2098.76	1491	1387.84	Promoter (<=1kb)	7	62417593	62420139	2547	2	22652	uc009hfi.1	0	ENSMUSG00000070527	Mkrn3	makorin, ring finger protein, 3	uc009hfi.1;uc009hfj.1	22652;27412	0;0
chr5	35379269	35401821	22553	*	8.86	9.28	8.25	1.04	1.28e-20	1.87e-18	645.12	602.17	287	320.48	Promoter (<=1kb)	5	35389117	35392872	3756	1	15371	uc008xds.1	0	ENSMUSG00000067438	Hmx1	H6 homeobox 1	uc008xds.1;uc008xdr.1	15371;442795	0;0
chr16	94075753	94101538	25786	*	9.2	9.59	8.66	0.93	2.29e-20	3.3e-18	817.26	726.38	407	402.37	Promoter (<=1kb)	16	94085260	94127032	41773	1	20465	uc008aae.1	0	ENSMUSG00000062713	Sim2	single-minded family bHLH transcription factor 2	uc008aae.1;uc012ais.1	20465;20465	0;0
chr8	100621792	101057632	435841	*	13.1	12.96	13.22	-0.26	3.06e-20	4.37e-18	7953.66	8018.77	9518	9624.94	Distal Intergenic	8	99416674	99733438	316765	1	234624	uc009mzs.2	1205118	ENSMUSG00000052479	A330008L17Rik	RIKEN cDNA A330008L17 gene	NA	NA	NA
chr8	104019201	104223871	204671	*	11.88	12.05	11.68	0.37	3.24e-20	4.58e-18	4245.18	4264.5	3205	3374.78	Promoter (<=1kb)	8	104101625	104144502	42878	1	12562	uc009mzx.2	0	ENSMUSG00000031871	Cdh5	cadherin 5	uc009mzx.2;uc057amq.1;uc009naa.2;uc009nab.2;uc009mzy.3;uc012giu.2;uc012giv.2	12562;546096;57813;57813;65115;65115;65115	0;0;0;0;0;0;0
chr14	63237952	63260882	22931	*	8.94	9.34	8.38	0.96	3.74e-20	5.23e-18	647.6	648.44	339	327.6	Promoter (<=1kb)	14	63198914	63245271	46358	2	14463	uc007uhn.2	0	ENSMUSG00000021944	Gata4	GATA binding protein 4	uc007uhn.2;uc007uho.2;uc007uhp.1	14463;14463;14463	0;0;0
chr18	37400940	37576196	175257	*	11.67	11.85	11.47	0.39	3.96e-20	5.47e-18	3747.79	3642.85	2813	2841.55	Promoter (<=1kb)	18	37411674	37414514	2841	1	93881	uc008epv.1	0	ENSMUSG00000045657	Pcdhb10	protocadherin beta 10	uc008eoy.3;uc056zgg.2;uc056zgh.2;uc008epu.1;uc008epv.1;uc008epw.1;uc008epx.1;uc008epy.1;uc008epz.1;uc008eqa.1;uc008eqb.2;uc008eqc.1;uc008eqd.1;uc008eqe.1;uc008eqf.3;uc012bby.2	100384868;103611158;103611159;93880;93881;93882;93883;93884;93885;93886;93887;93888;93889;93890;93891;93893	0;0;0;0;0;0;0;0;0;0;0;0;0;0;0;0
chr8	106493475	106611569	118095	*	11.18	11.39	10.93	0.46	4.69e-20	6.41e-18	2667.36	2693.62	1915	1992.29	Promoter (<=1kb)	8	106603350	106670247	66898	1	12550	uc009ngi.2	0	ENSMUSG00000000303	Cdh1	cadherin 1	uc009ngi.2;uc009ngg.2;uc009ngh.2;uc029wvn.1	12550;12560;12560;68692	0;0;0;0
chr1	42674704	42732396	57693	*	9.97	10.27	9.59	0.68	6.06e-20	8.2e-18	1253.82	1209.82	787	754.01	Promoter (<=1kb)	1	42697146	42700210	3065	1	18993	uc007auw.2	0	ENSMUSG00000045515	Pou3f3	POU domain, class 3, transcription factor 3	uc007auw.2;uc007aus.1;uc007aut.1;uc007auu.1;uc007auv.1;uc033fix.2;uc007aux.2	18993;66297;66297;66297;66297;66620;73100	0;0;0;0;0;0;0
chr7	137301784	137328290	26507	*	9.19	9.57	8.68	0.89	9.12e-20	1.22e-17	769.67	752.56	434	385.46	Promoter (<=1kb)	7	137193671	137314445	120775	2	13593	uc009ker.2	0	ENSMUSG00000010476	Ebf3	early B cell factor 3	uc009ker.2;uc009kes.2;uc012fvm.1	13593;13593;13593	0;0;0
chr11	21979844	22013996	34153	*	9.43	9.78	8.96	0.82	9.71e-20	1.29e-17	907.05	847.54	502	494.07	Promoter (<=1kb)	11	21994764	22001651	6888	2	18423	uc007idy.1	0	ENSMUSG00000005917	Otx1	orthodenticle homeobox 1	uc007idy.1;uc007idz.1;uc007iea.3;uc007ieb.3	18423;18423;216565;216565	0;0;0;0
chr4	152110895	152181733	70839	*	10.1	10.39	9.75	0.63	1.02e-19	1.34e-17	1328.71	1348.64	858	866.17	Promoter (<=1kb)	4	152158867	152162469	3603	1	15206	uc008vzw.1	0	ENSMUSG00000028940	Hes2	hes family bHLH transcription factor 2	uc008vzw.1;uc056zyp.1;uc008vzg.2;uc008vzi.3;uc008vzh.2;uc008vzj.2;uc008vzm.1;uc008vzn.1;uc008vzo.1;uc008vzp.1;uc008vzq.1;uc008vzr.1;uc008vzs.1;uc008vzt.1;uc008vzu.1;uc008vzv.1;uc008vzx.2;uc008vzy.2;uc056zyo.1;uc008vzk.2	15206;15206;269608;269608;269608;269608;56226;56226;56226;56226;56226;56226;56226;56226;56226;56226;70025;70025;85030;85030	0;0;0;0;0;0;0;0;0;0;0;0;0;0;0;0;0;0;0;0
chr9	74841589	74881992	40404	*	9.63	9.95	9.21	0.75	1.07e-19	1.39e-17	981.12	1000.37	585	595.55	Promoter (<=1kb)	9	74848437	74852872	4436	1	100503019	uc009qrf.2	0	ENSMUSG00000066477	Gm16551	predicted gene 16551	uc009qrf.2;uc009qrg.3;uc009qrh.2	100503019;100503019;15379	0;0;0
chr13	98347640	98393721	46082	*	9.8	10.11	9.4	0.71	1.12e-19	1.44e-17	1128.43	1082.56	662	687.24	Promoter (<=1kb)	13	98354245	98356705	2461	1	15229	uc009van.1	0	ENSMUSG00000078302	Foxd1	forkhead box D1	uc009van.1	15229	0
chr16	91213822	91239297	25476	*	8.95	9.34	8.4	0.95	1.18e-19	1.5e-17	660.43	639.31	334	340.95	Promoter (<=1kb)	16	91225550	91228677	3128	1	50913	uc007zxe.1	0	ENSMUSG00000039830	Olig2	oligodendrocyte transcription factor 2	uc007zxe.1	50913	0
chr8	101381139	101711560	330422	*	12.76	12.61	12.89	-0.28	1.22e-19	1.54e-17	6187.56	6329.16	7681	7520.49	Distal Intergenic	8	102632095	102785111	153017	2	12552	uc009mzu.2	1073551	ENSMUSG00000031673	Cdh11	cadherin 11	NA	NA	NA
chr8	117057445	117165886	108442	*	11.04	11.25	10.79	0.46	1.64e-19	2.05e-17	2428.18	2458.6	1788	1755.49	Promoter (<=1kb)	8	117158135	117205186	47052	1	209239	uc009nox.1	0	ENSMUSG00000052557	Gan	giant axonal neuropathy	uc009nox.1;uc009now.2;uc012gll.1;uc012gli.1;uc012glk.1	209239;63857;63857;76645;76645	0;0;0;0;0
chr11	101152159	101181406	29248	*	8.9	9.3	8.33	0.97	2e-19	2.46e-17	656.7	608.26	328	316.91	Promoter (<=1kb)	11	101155884	101161787	5904	1	103768	uc007lnm.2	0	ENSMUSG00000045007	Tubg2	tubulin, gamma 2	uc007lnm.2;uc007lnn.1;uc007lns.1;uc007lno.3;uc007lnp.3;uc007lnq.3;uc007lnr.3;uc007lnt.1	103768;103768;12777;217198;217198;217198;217198;53321	0;0;0;0;0;0;0;0
chr14	79704599	79821076	116478	*	10.91	11.13	10.65	0.48	2.01e-19	2.46e-17	2269.28	2223.58	1591	1621.07	Promoter (<=1kb)	14	79766772	79771312	4541	2	18530	uc007uti.3	0	ENSMUSG00000036422	Pcdh8	protocadherin 8	uc007uti.3;uc007utj.3;uc007uth.2;uc011zoz.1	18530;18530;73989;791080	0;0;0;0
chr3	99230253	99268625	38373	*	9.49	9.82	9.05	0.77	2.23e-19	2.71e-17	907.88	905.99	532	529.67	Promoter (<=1kb)	3	99253760	99354260	100501	1	21384	uc008qql.1	0	ENSMUSG00000027868	Tbx15	T-box 15	uc008qql.1	21384	0
chr11	103789386	103821853	32468	*	9.24	9.61	8.74	0.87	2.35e-19	2.83e-17	787.46	775.7	406	451.34	3' UTR	11	103821782	103954056	132275	2	18195	uc007lvt.2	132203	ENSMUSG00000034187	Nsf	N-ethylmaleimide sensitive fusion protein	uc007lvt.2;uc007lvs.2	18195;22415	0;0
chr5	75142949	75162116	19168	*	8.33	8.8	7.62	1.19	2.45e-19	2.92e-17	448.56	444.47	188	204.75	Promoter (<=1kb)	5	75152291	75175150	22860	1	18595	uc008xua.1	0	ENSMUSG00000029231	Pdgfra	platelet derived growth factor receptor, alpha polypeptide	uc008xtz.1;uc008xua.1;uc008xub.1;uc008xuc.1;uc008xud.1;uc008xue.1;uc008xuf.4	100503184;18595;18595;18595;18595;18595;18595	0;0;0;0;0;0;0
chr11	33185008	33212088	27081	*	9.04	9.43	8.52	0.91	3.16e-19	3.74e-17	689.81	685.58	355	378.34	Promoter (<=1kb)	11	33200752	33203588	2837	2	27140	uc007ikg.2	0	ENSMUSG00000040610	Tlx3	T cell leukemia, homeobox 3	uc007ikg.2;uc007ikh.2;uc007ikk.3	27140;66011;66011	0;0;0
chr12	8295581	8304242	8662	*	7.82	8.35	6.95	1.4	3.5e-19	4.11e-17	330.21	323.92	120	127.3	Promoter (<=1kb)	12	8297918	8301954	4037	2	238057	uc007mzl.1	0	ENSMUSG00000037660	Gdf7	growth differentiation factor 7	uc007mzl.1;uc057bax.1	238057;238057	0;0
chr18	64320479	64349801	29323	*	9.28	9.65	8.78	0.86	3.65e-19	4.24e-17	767.19	835.97	452	429.97	Promoter (<=1kb)	18	64340364	64398488	58125	1	225631	uc008fef.1	0	ENSMUSG00000045991	Onecut2	one cut domain, family member 2	uc008fef.1	225631	0
chr13	48653158	48676821	23664	*	8.94	9.34	8.38	0.96	4.56e-19	5.26e-17	660.84	631.39	315	350.74	Promoter (<=1kb)	13	48663036	48666507	3472	1	12022	uc007qil.1	0	ENSMUSG00000021381	Barx1	BarH-like homeobox 1	uc007qil.1	12022	0
chr3	87945951	87986693	40743	*	9.29	9.65	8.82	0.83	7.19e-19	8.22e-17	810.22	795.18	471	432.64	Promoter (<=1kb)	3	87948693	87953372	4680	1	12904	uc008ptk.1	0	ENSMUSG00000004885	Crabp2	cellular retinoic acid binding protein II	uc008pto.2;uc008ptk.1;uc008ptl.1;uc008ptm.1;uc008ptn.1	12032;12904;18008;18008;18008	0;0;0;0;0
chr8	71496786	71545789	49004	*	9.84	10.14	9.47	0.67	7.45e-19	8.44e-17	1124.71	1136.14	706	710.39	Promoter (<=1kb)	8	71534259	71537437	3179	2	69550	uc009mdr.2	0	ENSMUSG00000046718	Bst2	bone marrow stromal cell antigen 2	uc009mdr.2;uc009mdn.1;uc009mdo.1;uc009mds.1;uc009mdt.1;uc009mdp.2	69550;70359;70359;73711;73711;84094	0;0;0;0;0;0
chr5	29466533	29501753	35221	*	9.31	9.66	8.83	0.83	7.97e-19	8.87e-17	797.81	820.14	440	472.7	Promoter (<=1kb)	5	29473823	29478470	4648	2	15285	uc008wuk.2	0	ENSMUSG00000001566	Mnx1	motor neuron and pancreas homeobox 1	uc008wuk.2	15285	0
chr8	50250656	50597045	346390	*	12.85	12.71	12.98	-0.27	7.97e-19	8.87e-17	6636.12	6768.76	8144	7991.41	Promoter (<=1kb)	8	50368112	50416089	47978	1	100039954	uc029wsx.1	0	ENSMUSG00000110281	Gm2516	predicted gene 2516	uc029wsx.1	100039954	0
chr10	84750183	84770499	20317	*	8.74	9.15	8.16	0.99	1.02e-18	1.12e-16	564.01	572.94	291	281.31	Promoter (<=1kb)	10	84756048	84906538	150491	1	71137	uc007gkv.1	0	ENSMUSG00000020037	Rfx4	regulatory factor X, 4 (influences HLA class II expression)	uc007gkv.1	71137	0
chr4	22470563	22514883	44321	*	9.81	10.12	9.41	0.71	1.11e-18	1.22e-16	1118.5	1104.48	718	640.95	Promoter (<=1kb)	4	22490548	22493126	2579	1	105500046	uc057brm.1	0	ENSMUSG00000107859	Gm30731	predicted gene, 30731	uc057brm.1;uc008sdp.2	105500046;18992	0;0
chr5	75062161	75091858	29698	*	9.26	9.62	8.77	0.85	1.45e-18	1.57e-16	813.53	761.08	415	456.68	Promoter (<=1kb)	5	75075601	75077893	2293	1	14843	uc008xtx.1	0	ENSMUSG00000035946	Gsx2	GS homeobox 2	uc008xtx.1;uc008xty.1	14843;14843	0;0
chr11	69111675	69128153	16479	*	8.22	8.7	7.5	1.19	1.52e-18	1.64e-16	419.59	409.77	184	178.93	Promoter (<=1kb)	11	69126377	69149115	22739	1	23801	uc007jpj.2	0	ENSMUSG00000020892	Aloxe3	arachidonate lipoxygenase 3	uc007jpg.3;uc007jph.3;uc011xwu.2;uc007jpj.2;uc007jpi.1	18626;18626;18626;23801;84653	12719;11517;11166;0;0
chr2	116528050	116583345	55296	*	9.85	10.16	9.47	0.69	2.53e-18	2.7e-16	1164.44	1117.27	675	738.87	Distal Intergenic	2	116878691	116892500	13810	1	67356	uc008lre.2	-295346	ENSMUSG00000027355	Tmco5	transmembrane and coiled-coil domains 5	NA	NA	NA
chr16	18614919	18640029	25111	*	8.78	9.19	8.2	0.99	3.17e-18	3.36e-16	577.67	589.99	274	313.35	Promoter (<=1kb)	16	18620319	18622403	2085	2	14724	uc007yoi.1	0	ENSMUSG00000050761	Gp1bb	glycoprotein Ib, beta polypeptide	uc007yoi.1;uc012aci.1;uc007yoj.1;uc012acj.1;uc012ack.1	14724;14724;18951;18951;18951	0;0;0;0;0
chr8	97836837	98174280	337444	*	12.69	12.55	12.81	-0.26	4.36e-18	4.58e-16	5961.63	6033.25	7235	7171.52	Distal Intergenic	8	99007127	99032740	25614	1	100873092	uc057lxr.1	-832847	ENSMUSG00000089819	Gm15679	predicted gene 15679	NA	NA	NA
chr1	56964481	56986643	22163	*	8.67	9.09	8.08	1	5.16e-18	5.38e-16	541.67	546.15	284	259.05	Promoter (<=1kb)	1	56793981	56971334	177354	2	212712	uc007bas.1	0	ENSMUSG00000038331	Satb2	special AT-rich sequence binding protein 2	uc007bas.1;uc011wlc.1;uc011wld.1;uc029qoo.1;uc007bat.2	212712;212712;329160;329160;329160	0;0;0;0;0
chr13	94867840	94896053	28214	*	9.39	9.75	8.92	0.84	5.36e-18	5.54e-16	920.29	804.31	495	470.92	Promoter (<=1kb)	13	94875627	94883681	8055	1	18420	uc007rly.1	0	ENSMUSG00000021685	Otp	orthopedia homeobox	uc007rly.1	18420	0
chr11	18998526	19043750	45225	*	9.67	10	9.25	0.75	5.98e-18	6.14e-16	1012.98	1036.9	656	560.83	Promoter (<=1kb)	11	18880428	19018969	138542	2	17268	uc007icl.2	0	ENSMUSG00000020160	Meis1	Meis homeobox 1	uc007icl.2;uc007icm.2;uc007icn.2;uc007ico.2	17268;17268;17268;17268	0;0;0;0
chrX	12076048	12094652	18605	*	7.55	8.12	6.61	1.51	6.7e-18	6.82e-16	264	292.26	96	99.7	Promoter (<=1kb)	20	12036737	12080553	43817	2	71458	uc009sqq.3	0	ENSMUSG00000040363	Bcor	BCL6 interacting corepressor	uc009sqq.3;uc009sqr.3;uc009sqs.3;uc009sqt.3;uc009squ.2	71458;71458;71458;71458;71458	0;0;0;0;0
chr1	155721923	155754132	32210	*	9.35	9.69	8.9	0.79	6.99e-18	7.06e-16	823.05	829.28	498	459.35	Promoter (<=1kb)	1	155701692	155742027	40336	2	16872	uc007dbn.3	0	ENSMUSG00000026468	Lhx4	LIM homeobox protein 4	uc007dbn.3	16872	0
chr10	59941059	59980893	39835	*	9.17	9.52	8.69	0.83	9.18e-18	9.21e-16	740.29	730.03	406	422.85	Promoter (<=1kb)	10	59949675	59951770	2096	2	74747	uc007fee.1	0	ENSMUSG00000020108	Ddit4	DNA-damage-inducible transcript 4	uc007fee.1	74747	0
chr13	31607351	31635835	28485	*	9.11	9.47	8.62	0.85	9.26e-18	9.21e-16	698.08	720.29	382	404.15	Promoter (<=1kb)	13	31625816	31631406	5591	1	14238	uc007pzo.2	0	ENSMUSG00000038402	Foxf2	forkhead box F2	uc007pzo.2;uc007pzn.1	14238;71307	0;0
chr13	112978617	113010060	31444	*	9.24	9.59	8.76	0.83	1.1e-17	1.09e-15	789.53	754.39	459	407.72	Promoter (<=1kb)	13	112987802	112990778	2977	1	218630	uc007rwz.1	0	ENSMUSG00000042417	Ccno	cyclin O	uc007rwz.1;uc007rxa.1	218630;622408	0;0
chr7	140044275	140062199	17925	*	8.67	9.08	8.08	1	1.34e-17	1.31e-15	535.04	549.81	256	285.76	Promoter (<=1kb)	7	140046157	140048999	2843	2	17703	uc057lvs.1	0	ENSMUSG00000025469	Msx3	msh homeobox 3	uc057lvs.1;uc012fwf.1;uc009kgo.2;uc012fwe.1;uc009kgp.2	17703;17703;69752;69752;69752	0;0;7884;7884;7486
chr13	55814419	55844464	30046	*	9.25	9.61	8.78	0.83	1.35e-17	1.31e-15	799.05	762.3	415	464.69	Promoter (<=1kb)	13	55825054	55831425	6372	2	18740	uc007qsd.1	0	ENSMUSG00000021506	Pitx1	paired-like homeodomain transcription factor 1	uc007qsd.1	18740	0
chr6	127144958	127164746	19789	*	8.53	8.96	7.92	1.03	3.55e-17	3.42e-15	511.87	482.83	254	231.45	Promoter (<=1kb)	6	127125708	127151048	25341	2	12444	uc009dvr.2	0	ENSMUSG00000000184	Ccnd2	cyclin D2	uc009dvr.2;uc009dvs.1;uc009dvt.2;uc009dvu.2;uc029vyr.1	12444;12444;77558;77558;77558	0;0;0;0;0
chr8	63075892	63296461	220570	*	12.16	11.99	12.31	-0.32	3.92e-17	3.76e-15	4090.42	4047.74	5212	4926.42	Exon (uc009lur.2/72902, exon 3 of 11)	8	62951232	63357098	405867	1	72902	uc009lur.2	124660	ENSMUSG00000054162	Spock3	sparc/osteonectin, cwcv and kazal-like domains proteoglycan 3	uc009lur.2;uc033jfr.2;uc057lxj.1	72902;72902;72902	0;0;0
chr8	91773509	92106749	333241	*	12.62	12.76	12.47	0.29	3.97e-17	3.78e-15	6973.37	6910.63	5497	5852.23	Promoter (<=1kb)	8	91798511	91801654	3144	2	16373	uc009msu.2	0	ENSMUSG00000031734	Irx3	Iroquois related homeobox 3	uc009msu.2;uc009msv.2	16373;16373	0;0
chr17	27227649	27281623	53975	*	10.3	10.57	9.97	0.61	4.06e-17	3.84e-15	1545.55	1504.51	933	1069.14	Promoter (<=1kb)	17	27235075	27242656	7582	2	319720	uc008bfn.1	0	NA	9630028I04Rik	RIKEN cDNA 9630028I04 gene	uc008bfn.1;uc008bfo.1	319720;319720	0;0
chr17	34181639	34225673	44035	*	9.19	9.54	8.73	0.81	4.24e-17	3.97e-15	765.95	722.12	420	428.19	Promoter (<=1kb)	17	34182099	34187330	5232	2	16912	uc008cbs.1	0	ENSMUSG00000096727	Psmb9	proteasome (prosome, macropain) subunit, beta type 9 (large multifunctional peptidase 2)	uc008cbs.1;uc012apv.1;uc008cby.1;uc008cbt.2;uc008cbu.2;uc012apt.1;uc012apu.1;uc008cbv.2;uc008cbx.2	16912;16913;18132;21354;21354;21354;21354;21354;21355	0;0;-502;0;0;0;0;0;0
chr6	64715534	64748702	33169	*	9.33	9.67	8.89	0.77	4.32e-17	4.03e-15	840.43	787.26	477	474.48	Promoter (<=1kb)	6	64729146	64731243	2098	1	11921	uc009ceb.3	0	ENSMUSG00000073043	Atoh1	atonal bHLH transcription factor 1	uc009ceb.3	11921	0
chr2	84865973	84895835	29863	*	9.07	9.43	8.59	0.85	4.96e-17	4.58e-15	701.81	681.32	403	365.88	Promoter (<=1kb)	2	84871946	84886692	14747	2	269295	uc008kjm.1	0	ENSMUSG00000050896	Rtn4rl2	reticulon 4 receptor-like 2	uc008kjm.1;uc008kji.1;uc008kjj.1;uc008kjk.1;uc008kjl.1	269295;72401;72401;72401;72401	0;26565;26565;25650;25347
chr14	28500300	28525929	25630	*	8.9	9.28	8.39	0.89	5.35e-17	4.92e-15	628.98	611.91	329	342.73	Promoter (<=1kb)	14	28505473	28525515	20043	1	22418	uc007sug.2	0	ENSMUSG00000021994	Wnt5a	wingless-type MMTV integration site family, member 5A	uc007sug.2;uc007suh.2	22418;22418	0;0
chr8	105252617	105302670	50054	*	10.09	10.37	9.74	0.63	5.49e-17	5e-15	1313.82	1335.24	807	908.9	Promoter (<=1kb)	8	105297663	105305370	7708	1	104394	uc009ncl.1	0	ENSMUSG00000014859	E2f4	E2F transcription factor 4	uc009ncl.1;uc009nbt.3;uc009nbu.3;uc009nbv.3;uc009nbw.1;uc009ncm.2;uc009ncn.2;uc012gjh.1;uc009nco.2;uc009nca.2;uc009ncb.2;uc009ncc.2;uc012gjg.2;uc009nci.1;uc009ncj.1;uc009nbz.2;uc012gjf.1;uc009nby.1;uc009ncf.1;uc009nce.2;uc009ncg.2;uc009nch.2;uc009ncd.1;uc009nbx.2;uc029wvg.2	104394;234678;234678;234678;234678;234683;234683;234683;234683;26386;26386;26386;26386;277978;277978;50788;50788;71609;74356;74356;74356;74356;78688;97440;97440	0;0;0;0;3874;-2931;-2931;-2931;-3675;0;0;0;0;0;0;0;0;0;0;0;0;0;0;0;0
chr2	57096689	57131834	35146	*	9.38	9.71	8.97	0.74	7.44e-17	6.73e-15	832.98	839.02	497	502.97	Promoter (<=1kb)	2	57107226	57115038	7813	2	18227	uc008jrw.2	0	ENSMUSG00000026826	Nr4a2	nuclear receptor subfamily 4, group A, member 2	uc008jrw.2;uc012bvn.1;uc008jrx.2;uc008jry.2;uc029txk.1	18227;18227;18227;18227;767815	0;0;0;0;0
chr2	122294350	122321016	26667	*	8.92	9.29	8.42	0.87	8.08e-17	7.27e-15	624.43	628.35	348	337.39	Promoter (<=1kb)	2	122303549	122313730	10182	2	213696	uc008mao.1	0	ENSMUSG00000027224	Duoxa1	dual oxidase maturation factor 1	uc008mao.1;uc008mak.1;uc012ccx.1;uc008mam.1;uc008map.1	213696;214593;214593;66811;99439	0;0;0;0;0
chr5	106432306	106472865	40560	*	9.71	10	9.34	0.67	8.53e-17	7.62e-15	1042.78	1011.94	633	659.64	Promoter (<=1kb)	5	106452523	106458166	5644	2	104382	uc008ylm.1	0	ENSMUSG00000034384	Barhl2	BarH like homeobox 2	uc008ylm.1	104382	0
chr14	25446230	25463557	17328	*	8.02	8.51	7.26	1.25	8.72e-17	7.73e-15	347.59	381.76	143	163.8	Promoter (<=1kb)	14	25459185	25648490	189306	1	328365	uc007srm.2	0	ENSMUSG00000007817	Zmiz1	zinc finger, MIZ-type containing 1	uc007srm.2;uc007srn.3;uc007sro.3	328365;328365;328365	0;0;0
chr3	88193891	88221608	27718	*	9.01	9.37	8.52	0.86	9.75e-17	8.59e-15	659.18	668.53	385	348.96	Promoter (<=1kb)	3	88215171	88215257	87	1	100526540	uc012crn.1	0	ENSMUSG00000092988	Mir3093	microRNA 3093	uc012crn.1;uc012cro.1	100526540;387133	0;0
chr2	159046931	159103535	56605	*	9.81	10.09	9.45	0.64	1e-16	8.79e-15	1099.05	1083.17	705	697.03	Distal Intergenic	2	158794807	158858220	63414	1	71715	uc008nqu.2	252124	ENSMUSG00000027655	Dhx35	DEAH (Asp-Glu-Ala-His) box polypeptide 35	NA	NA	NA
chr5	74935155	74969153	33999	*	9.11	9.46	8.64	0.82	1.04e-16	9.06e-15	707.19	701.41	413	386.35	Promoter (<=1kb)	5	74949194	74966368	17175	1	619945	uc029vir.1	0	ENSMUSG00000072874	Gm6116	predicted gene 6116	uc029vir.1	619945	0
chr14	48701662	48720369	18708	*	8.45	8.88	7.84	1.04	1.31e-16	1.13e-14	487.46	453	230	227	Intron (uc007tjt.1/606497, intron 4 of 4)	14	48669288	48793348	124061	1	606497	uc007tjt.1	32374	ENSMUSG00000098682	Otx2os1	orthodenticle homeobox 2 opposite strand 1	uc007tjt.1	606497	0
chr9	69743858	69786796	42939	*	9.63	9.93	9.26	0.68	1.34e-16	1.15e-14	989.4	964.44	615	608.01	Promoter (<=1kb)	9	69758740	69830199	71460	1	319970	uc009qnj.2	0	ENSMUSG00000097623	B230323A14Rik	RIKEN cDNA B230323A14 gene	uc009qnj.2;uc029xeo.1;uc012gwj.1	319970;319970;64290	0;0;0
chr10	127508284	127536403	28120	*	8.92	9.3	8.41	0.89	1.42e-16	1.21e-14	641.39	618.61	362	318.69	Promoter (<=1kb)	10	127525473	127534559	9087	2	104080	uc007hjw.1	0	ENSMUSG00000040258	Nxph4	neurexophilin 4	uc007hjw.1;uc007hju.2;uc007hjv.2;uc007hjx.2;uc007hjr.1;uc007hjs.1;uc007hjt.3	104080;108037;108037;16971;237611;237611;407790	0;0;0;84745;0;0;0
chr11	69324997	69347358	22362	*	8.76	9.16	8.2	0.95	1.67e-16	1.41e-14	557.8	583.29	273	316.02	Promoter (<=1kb)	11	69326258	69333041	6784	1	16499	uc007jps.1	0	ENSMUSG00000018470	Kcnab3	potassium voltage-gated channel, shaker-related subfamily, beta member 3	uc007jps.1;uc007jpt.1;uc007jpu.1;uc007jpp.1;uc011xwv.1;uc029rmh.2;uc007jpx.3;uc029rmi.2;uc007jpq.2;uc007jpr.1;uc007jpv.2	16499;16499;16499;216846;216846;216848;216848;216848;245828;245828;80515	0;0;0;-1124;-1124;0;0;0;0;0;0
chr8	108345086	108758114	413029	*	12.93	13.05	12.81	0.24	2.43e-16	2.04e-14	8476.71	8444.97	7222	7100.31	Promoter (<=1kb)	8	108553252	108584677	31426	2	109215	uc009nic.2	0	ENSMUSG00000110613	Lncbate1	brown adipose tissue enriched long non-coding RNA 1	uc009nic.2;uc009nid.1	109215;11906	0;0
chr8	50604477	50863326	258850	*	12.4	12.25	12.53	-0.28	3.17e-16	2.65e-14	4872.92	4855.71	6060	5777.46	Distal Intergenic	8	50368112	50416089	47978	1	100039954	uc029wsx.1	236365	ENSMUSG00000110281	Gm2516	predicted gene 2516	NA	NA	NA
chr4	65223212	65277745	54534	*	9.94	10.23	9.59	0.64	3.25e-16	2.7e-14	1250.51	1147.71	794	749.56	Exon (uc008thm.1/18491, exon 8 of 22)	4	65124174	65357509	233336	1	18491	uc008thm.1	99038	ENSMUSG00000028370	Pappa	pregnancy-associated plasma protein A	uc008thm.1;uc012dgb.1	18491;18491	0;0
chr13	73254302	73273234	18933	*	8.55	8.97	7.96	1.01	3.29e-16	2.71e-14	530.91	473.7	256	242.14	Promoter (<=1kb)	13	73260497	73269620	9124	1	50916	uc007rdf.2	0	ENSMUSG00000021604	Irx4	Iroquois homeobox 4	uc007rdf.2	50916	0
chr12	9569583	9584773	15191	*	8.32	8.76	7.7	1.06	3.75e-16	3.08e-14	437.39	426.82	208	206.53	Promoter (<=1kb)	12	9574442	9581500	7059	1	23967	uc007nao.2	0	ENSMUSG00000048387	Osr1	odd-skipped related transcription factor 1	uc007nao.2;uc007nan.1	23967;69420	0;0
chr11	18861893	18883067	21175	*	8.54	8.95	7.96	0.99	3.95e-16	3.22e-14	509.8	478.57	256	241.25	3' UTR	11	18880428	19018969	138542	2	17268	uc007icl.2	135902	ENSMUSG00000020160	Meis1	Meis homeobox 1	uc007icl.2;uc007icm.2;uc007icn.2	17268;17268;17268	0;0;0
chr2	73257058	73296244	39187	*	9.56	9.86	9.18	0.68	5.02e-16	4.07e-14	928.57	930.35	584	578.64	Promoter (<=1kb)	2	73271926	73275771	3846	1	381373	uc008kcj.2	0	ENSMUSG00000068859	Sp9	trans-acting transcription factor 9	uc008kcj.2;uc008kck.2;uc012bxg.1	381373;66935;66935	0;0;0
chr6	83692679	83722571	29893	*	9.17	9.51	8.71	0.79	5.08e-16	4.09e-14	708.43	748.91	434	405.94	Promoter (<=1kb)	6	83711264	83738304	27041	1	24113	uc009cob.1	0	ENSMUSG00000034777	Vax2	ventral anterior homeobox 2	uc009cob.1;uc009cnx.1;uc009cny.2;uc009cnz.1;uc009coa.1	24113;574519;574519;574519;574519	0;0;0;0;0
chr4	119489292	119506330	17039	*	8.42	8.84	7.83	1.02	5.15e-16	4.13e-14	455.59	463.35	232	221.66	Promoter (<=1kb)	4	119465283	119492598	27316	2	194237	uc008umo.4	0	ENSMUSG00000048899	Rimkla	ribosomal modification protein rimK-like family member A	uc008umo.4	194237	0
chr5	142804385	142826831	22447	*	8.21	8.69	7.49	1.2	5.56e-16	4.42e-14	435.32	389.07	157	202.08	Promoter (<=1kb)	5	142724605	142817387	92783	2	231861	uc033inn.1	0	ENSMUSG00000039477	Tnrc18	trinucleotide repeat containing 18	uc033inn.1;uc009ajg.1	231861;231861	0;0
chr17	29393755	29421832	28078	*	8.68	9.07	8.14	0.94	5.8e-16	4.58e-14	558.22	519.97	274	288.43	Distal Intergenic	17	29365416	29379535	14120	1	26382	uc008bsy.2	28339	ENSMUSG00000024013	Fgd2	FYVE, RhoGEF and PH domain containing 2	NA	NA	NA
chr8	124746056	124836107	90052	*	10.7	10.91	10.45	0.46	8.47e-16	6.66e-14	1935.76	1911.23	1380	1412.76	Promoter (<=1kb)	8	124793019	124834704	41686	1	330863	uc012gmz.1	0	ENSMUSG00000036913	Trim67	tripartite motif-containing 67	uc012gmz.1;uc009nxs.2;uc009nxp.1	330863;66523;69627	0;0;0
chr7	143162357	143270992	108636	*	11	11.2	10.76	0.44	8.75e-16	6.84e-14	2400.87	2313.69	1798	1670.03	3' UTR	7	143107254	143427042	319789	1	16535	uc009kpb.1	55103	ENSMUSG00000009545	Kcnq1	potassium voltage-gated channel, subfamily Q, member 1	uc009kpb.1;uc012fxu.1;uc012fxx.1	16535;16535;63830	0;0;0
chr3	127621116	127650546	29431	*	9.31	9.63	8.89	0.74	8.87e-16	6.89e-14	789.12	796.4	491	457.57	Promoter (<=1kb)	3	127633145	127635631	2487	1	11924	uc008rhi.1	0	ENSMUSG00000027967	Neurog2	neurogenin 2	uc008rhi.1;uc008rhf.2;uc008rhh.2;uc008rhg.2	11924;71643;71643;71643	0;67627;67627;67614
chr9	110724683	110748343	23661	*	8.48	8.91	7.86	1.05	1.03e-15	7.95e-14	497.8	465.78	208	256.38	Promoter (<=1kb)	9	110722085	110742610	20526	2	19228	uc009ruo.1	0	ENSMUSG00000032492	Pth1r	parathyroid hormone 1 receptor	uc009ruo.1;uc009rup.1;uc009ruq.1	19228;19228;19228	0;0;0
chr2	146214125	146232176	18052	*	8.54	8.95	7.97	0.97	1.13e-15	8.7e-14	482.49	505.36	243	259.94	Promoter (<=1kb)	2	146221997	146225020	3024	1	53626	uc008msh.3	0	ENSMUSG00000068154	Insm1	insulinoma-associated 1	uc008msh.3	53626	0
chr8	99077515	99466263	388749	*	13.01	12.89	13.12	-0.23	1.25e-15	9.52e-14	7557.24	7581.6	9011	8794.38	Promoter (<=1kb)	8	99024471	99416471	392001	2	12564	uc009mzm.2	0	ENSMUSG00000036510	Cdh8	cadherin 8	uc009mzm.2;uc033jhb.1;uc009mzn.2;uc009mzo.2;uc009mzq.1;uc009mzr.2;uc009mzs.2	12564;12564;12564;12564;12564;234624;234624	0;0;0;0;0;0;0
chr6	122604359	122890625	286267	*	12.32	12.45	12.17	0.28	1.39e-15	1.06e-13	5505.2	5712.99	4561	4654.9	Promoter (<=1kb)	6	122831377	122831437	61	1	102465710	uc033iun.1	0	ENSMUSG00000106580	Mir7231	microRNA 7231	uc033iun.1;uc009dpk.1;uc009dpl.1;uc009dps.1;uc009dpm.1;uc009dpq.2;uc012esg.1;uc012esh.1;uc009dpt.1;uc033iul.1;uc009dpo.2;uc029vyl.2;uc033ium.1;uc009dpn.1	102465710;11810;11810;12267;14562;20527;20527;60611;67602;71950;71950;71950;71950;73708	0;-1915;-1915;0;0;0;0;0;0;0;0;0;0;0
chr18	36989301	37030558	41258	*	9.77	10.05	9.42	0.62	1.4e-15	1.06e-13	1070.09	1042.99	693	678.34	Promoter (<=1kb)	18	37010858	37160705	149848	1	12942	uc008epg.1	0	ENSMUSG00000102206	Pcdha11	protocadherin alpha 11	uc008eoy.3;uc056zgg.2;uc056zgh.2;uc008eou.1;uc008eot.3;uc008eox.4;uc012bbw.2;uc008epb.4;uc008epc.4;uc008eoz.3;uc008epg.1;uc012bbx.1;uc008eph.3;uc008epf.3;uc008epe.3;uc008eow.3;uc008epi.3;uc012bbv.1;uc008eov.3;uc008epd.3	100384868;103611158;103611159;116731;116731;12936;12937;12937;12939;12941;12942;12942;12942;12943;192161;192163;192164;353234;353234;353235	0;0;0;0;0;0;0;0;0;0;0;0;0;0;0;0;0;0;0;0
chr8	58471268	58726290	255023	*	12.37	12.23	12.5	-0.27	1.48e-15	1.1e-13	4834.43	4788.12	5898	5706.24	Promoter (<=1kb)	8	58698849	58700796	1948	2	100271928	uc012geb.2	0	NA	Gm15881	predicted gene 15881	uc012geb.2;uc012gea.2;uc009ltc.1	100271928;270049;270049	0;0;0
chr9	88306788	88346925	40138	*	9.42	9.74	9.01	0.72	1.48e-15	1.1e-13	880.15	829.28	496	538.58	Promoter (<=1kb)	9	88327609	88367844	40236	1	23959	uc009qyi.2	0	ENSMUSG00000032420	Nt5e	5' nucleotidase, ecto	uc009qyi.2;uc009qyj.2	23959;23959	0;0
chr15	27990082	28029993	39912	*	9.28	9.6	8.86	0.74	1.57e-15	1.17e-13	783.74	766.56	461	470.03	Promoter (<=1kb)	15	27730649	28025848	295200	2	223435	uc007vjw.1	0	ENSMUSG00000022263	Trio	triple functional domain (PTPRF interacting)	uc007vjw.1	223435	0
chr4	109652283	109670977	18695	*	8.86	9.23	8.37	0.86	1.74e-15	1.28e-13	620.29	581.47	338	324.93	Promoter (<=1kb)	4	109660876	109665372	4497	2	12580	uc008ucr.1	0	ENSMUSG00000028551	Cdkn2c	cyclin dependent kinase inhibitor 2C	uc008ucr.1;uc008ucs.2	12580;12580	0;0
chr13	72619812	72645402	25591	*	8.97	9.32	8.5	0.81	2.51e-15	1.84e-13	651.32	624.7	365	360.53	Promoter (<=1kb)	13	72628797	72634196	5400	1	16372	uc007rde.2	0	ENSMUSG00000001504	Irx2	Iroquois homeobox 2	uc007rde.2;uc011zbn.1	16372;328287	0;0
chr13	31793468	31822423	28956	*	8.95	9.3	8.49	0.81	2.74e-15	1.99e-13	629.8	632	361	356.97	Promoter (<=1kb)	13	31806646	31810635	3990	1	17300	uc007pzp.1	0	ENSMUSG00000050295	Foxc1	forkhead box C1	uc007pzp.1;uc007pzq.1	17300;218138	0;0
chr14	70067922	70099420	31499	*	9.18	9.52	8.73	0.79	2.74e-15	1.99e-13	758.08	712.98	398	451.34	Promoter (<=1kb)	14	70077445	70082613	5169	1	13655	uc007unb.2	0	ENSMUSG00000033730	Egr3	early growth response 3	uc007unb.2;uc007unc.2;uc033gru.1;uc007une.1	13655;13655;13655;57784	0;0;0;-725
chr8	99867063	100110834	243772	*	12.2	12.05	12.33	-0.28	2.95e-15	2.13e-13	4291.53	4202.39	5138	5144.52	Distal Intergenic	8	99416674	99733438	316765	1	234624	uc009mzs.2	450389	ENSMUSG00000052479	A330008L17Rik	RIKEN cDNA A330008L17 gene	NA	NA	NA
chr2	36193501	36213537	20037	*	8.53	8.93	7.97	0.95	3.08e-15	2.21e-13	496.15	476.13	256	245.7	Exon (uc008jlk.2/uc008jlk.2, exon 1 of 5)	2	36230426	36252272	21847	1	19224	uc008jll.3	-16889	ENSMUSG00000047250	Ptgs1	prostaglandin-endoperoxide synthase 1	uc008jlj.3	67871	57103
chr5	139900480	139915402	14923	*	8.27	8.7	7.65	1.05	3.13e-15	2.24e-13	426.63	403.68	199	202.08	Promoter (<=1kb)	5	139907943	139974725	66783	1	243312	uc009ahi.3	0	ENSMUSG00000048988	Elfn1	leucine rich repeat and fibronectin type III, extracellular 1	uc009ahi.3	243312	0
chr9	98946754	98983139	36386	*	9.31	9.62	8.9	0.72	3.16e-15	2.25e-13	777.95	800.05	473	483.38	Promoter (<=1kb)	9	98955607	98958126	2520	1	26927	uc009rdr.2	0	ENSMUSG00000050397	Foxl2	forkhead box L2	uc009rds.1;uc009rdt.2;uc012gyx.1;uc009rdr.2;uc009rdq.2	23873;23873;23873;26927;768252	-3234;-3234;-3234;0;0
chr1	184717236	184740340	23105	*	8.9	9.27	8.4	0.87	4.9e-15	3.46e-13	645.12	591.82	314	361.42	Promoter (<=1kb)	1	184727143	184732493	5351	2	15284	uc007dyn.3	0	ENSMUSG00000039377	Hlx	H2.0-like homeobox	uc007dyn.3;uc029qvc.1	15284;74971	0;0
chr8	69866362	69891933	25572	*	9.14	9.49	8.69	0.8	5.38e-15	3.77e-13	710.08	724.55	382	444.21	Promoter (<=1kb)	8	69887788	69890885	3098	2	234365	uc009lyc.1	0	ENSMUSG00000048967	Yjefn3	YjeF N-terminal domain containing 3	uc009lyc.1;uc009lyd.2;uc009lyb.2;uc009lxx.1;uc009lxy.1;uc009lxz.1;uc009lya.1	234365;67184;68709;80720;80720;80720;80720	0;0;0;0;0;0;0
chr8	34662670	35159033	496364	*	13.19	13.3	13.08	0.22	5.93e-15	4.14e-13	10125.7	10044.5	8722	8587.85	Promoter (<=1kb)	8	34829179	34890151	60973	2	21951	uc009lku.1	0	ENSMUSG00000031529	Tnks	tankyrase, TRF1-interacting ankyrin-related ADP-ribose polymerase	uc009lku.1;uc009lkv.1;uc009lks.1	21951;21951;319520	0;0;0
chr17	6722607	6750794	28188	*	8.89	9.26	8.39	0.88	6.71e-15	4.66e-13	655.05	575.38	319	349.85	3' UTR	17	6738131	6782780	44650	2	22350	uc008ahv.1	31986	ENSMUSG00000052397	Ezr	ezrin	uc008ahv.1;uc008ahq.2;uc008ahr.2;uc008ahs.2;uc012ajk.1;uc008aht.2;uc008ahu.2	22350;83672;83672;83672;83672;83672;83672	0;0;0;0;0;0;0
chr9	58183183	58209341	26159	*	8.7	9.09	8.17	0.92	6.97e-15	4.82e-13	516.84	572.94	279	298.22	Promoter (<=1kb)	9	58196297	58201715	5419	2	320563	uc009pwl.1	0	ENSMUSG00000051243	Islr2	immunoglobulin superfamily containing leucine-rich repeat 2	uc009pwl.1;uc012guf.1;uc012gug.1;uc009pwm.2;uc012guh.1;uc012gui.1;uc012guj.1;uc012guk.1;uc012gul.1	320563;320563;320563;320563;320563;320563;320563;320563;665268	0;0;0;0;0;0;0;0;0
chr7	118568633	118587969	19337	*	8.18	8.61	7.55	1.06	8.08e-15	5.56e-13	397.25	386.02	184	191.39	Promoter (<=1kb)	7	118535844	118584686	48843	2	209760	uc009jka.1	0	ENSMUSG00000042246	Tmc7	transmembrane channel-like gene family 7	uc009jka.1;uc009jkb.1;uc009jkc.1;uc009jkd.1	209760;209760;209760;381914	0;0;0;-4555
chr2	158606317	158619405	13089	*	7.91	8.38	7.22	1.16	8.15e-15	5.57e-13	337.25	328.79	146	152.23	Promoter (<=1kb)	2	158595472	158610723	15252	2	100045469	uc008nqj.1	0	ENSMUSG00000086496	Gm14204	predicted gene 14204	uc008nqj.1;uc012cii.1;uc029uhu.1;uc008nqk.1	100045469;100045469;22348;22348	0;0;0;0
chr16	18575061	18594059	18999	*	8.65	9.06	8.08	0.98	8.35e-15	5.68e-13	583.05	483.44	267	273.29	Promoter (<=1kb)	16	18581704	18586969	5266	2	21380	uc007yog.2	0	ENSMUSG00000009097	Tbx1	T-box 1	uc007yog.2;uc033gyg.1;uc007yoh.2	21380;21380;21380	0;0;0
chr1	120578519	120616265	37747	*	9.27	9.6	8.85	0.76	8.7e-15	5.89e-13	810.64	744.03	437	483.38	Promoter (<=1kb)	1	120602487	120607991	5505	1	13798	uc007cjm.2	0	ENSMUSG00000058665	En1	engrailed 1	uc007cjm.2	13798	0
chr15	38135513	38174248	38736	*	9.35	9.67	8.94	0.73	9.24e-15	6.22e-13	808.57	821.36	526	454.01	Distal Intergenic	15	38219203	38226735	7533	1	18285	uc011zsh.1	-44955	ENSMUSG00000061923	Odf1	outer dense fiber of sperm tails 1	NA	NA	NA
chr19	38339045	38352587	13543	*	8.01	8.46	7.34	1.13	1.01e-14	6.76e-13	364.97	340.36	163	160.24	Exon (uc008hjl.1/uc008hjl.1, exon 1 of 3)	19	38395980	38402590	6611	1	240660	uc008hjm.1	-43393	ENSMUSG00000044026	Slc35g1	solute carrier family 35, member G1	NA	NA	NA
chr4	129975101	129991495	16395	*	8.02	8.48	7.35	1.13	1.13e-14	7.54e-13	341.39	373.23	161	165.58	Promoter (<=1kb)	4	129984870	130022633	37764	1	230775	uc008uym.3	0	ENSMUSG00000028782	Adgrb2	adhesion G protein-coupled receptor B2	uc008uym.3;uc008uyn.3;uc008uyo.3;uc008uyp.1	230775;230775;230775;230775	0;0;0;-559
chr17	15369483	15397765	28283	*	9.18	9.5	8.77	0.73	1.14e-14	7.59e-13	729.94	722.72	436	437.98	Promoter (<=1kb)	17	15367354	15375823	8470	2	13388	uc008aoi.2	0	ENSMUSG00000014773	Dll1	delta like canonical Notch ligand 1	uc008aoi.2;uc008aoj.2;uc008aok.2	13388;67544;67544	0;0;0
chr4	21665519	21697035	31517	*	9.41	9.72	9.03	0.69	1.15e-14	7.59e-13	836.29	846.32	543	500.3	Promoter (<=1kb)	4	21677480	21685963	8484	2	230025	uc008sco.1	0	ENSMUSG00000040478	Prdm13	PR domain containing 13	uc008sco.1;uc012dav.4;uc008scp.1	230025;230025;230025	0;0;0
chr3	87791253	87817537	26285	*	8.8	9.17	8.32	0.85	1.16e-14	7.6e-13	562.77	586.34	309	328.49	Promoter (<=1kb)	3	87778244	87795162	16919	2	18211	uc008psw.1	0	ENSMUSG00000028072	Ntrk1	neurotrophic tyrosine kinase, receptor, type 1	uc008psw.1;uc008psx.2;uc008psy.2	18211;23920;23920	0;0;0
chr9	55535140	55558202	23063	*	8.98	9.32	8.53	0.79	1.28e-14	8.33e-13	650.49	625.91	365	373	Promoter (<=1kb)	9	55541149	55546178	5030	1	104360	uc009psm.1	0	ENSMUSG00000032318	Isl2	insulin related protein 2 (islet 2)	uc009psm.1;uc012gts.1;uc012gtt.1;uc009psn.1;uc009pso.1;uc012gtu.1	104360;104360;104360;244891;244891;244891	0;0;0;0;0;0
chr15	79493530	79522970	29441	*	8.8	9.16	8.31	0.85	1.32e-14	8.6e-13	575.18	571.73	303	332.94	Promoter (<=1kb)	15	79516408	79527739	11332	1	105785	uc007wto.2	0	ENSMUSG00000010830	Kdelr3	KDEL (Lys-Asp-Glu-Leu) endoplasmic reticulum protein retention receptor 3	uc007wto.2;uc007wtn.2;uc007wtp.1;uc007wtq.1;uc007wtr.1	105785;16520;67040;67040;67040	0;0;9947;23771;23771
chr4	115929766	115947976	18211	*	8.59	8.98	8.05	0.93	1.38e-14	8.93e-13	507.32	504.14	285	246.59	Promoter (<=1kb)	4	115915119	115939926	24808	2	140477	uc008ufq.1	0	ENSMUSG00000028707	Dmbx1	diencephalon/mesencephalon homeobox 1	uc008ufp.1;uc008ufq.1;uc057ljv.1	140477;140477;140477	-4128;0;0
chr2	118884837	118905398	20562	*	8.37	8.78	7.8	0.98	1.94e-14	1.25e-12	454.77	425.6	220	225.22	Promoter (<=1kb)	2	118901615	118924524	22910	1	228536	uc008lsw.1	0	ENSMUSG00000040007	Bahd1	bromo adjacent homology domain containing 1	uc008lsw.1;uc008lsv.1	228536;56357	0;22837
chr5	107708512	107740808	32297	*	9.32	9.63	8.93	0.7	2.22e-14	1.42e-12	789.95	794.57	506	469.14	Promoter (<=1kb)	5	107716655	107721342	4688	2	14581	uc008ymu.2	0	ENSMUSG00000029275	Gfi1	growth factor independent 1 transcription repressor	uc008yna.1;uc008ynb.1;uc008ymu.2;uc057lmz.1;uc029vkg.1;uc057lna.1;uc029vkh.1;uc057lnb.1;uc008ymx.2	14020;14020;14581;14581;14581;14581;14581;14581;14581	0;0;0;0;0;0;0;0;0
chr2	160354985	160391389	36405	*	9.28	9.59	8.88	0.71	2.28e-14	1.45e-12	780.01	761.08	485	459.35	Promoter (<=1kb)	2	160363677	160367065	3389	2	16658	uc008nqw.2	0	ENSMUSG00000074622	Mafb	v-maf musculoaponeurotic fibrosarcoma oncogene family, protein B (avian)	uc008nqw.2	16658	0
chr6	48436472	48449398	12927	*	7.81	8.28	7.1	1.19	2.37e-14	1.5e-12	316.56	306.87	145	129.08	Promoter (<=1kb)	6	48448229	48501250	53022	1	243369	uc029vvf.1	0	ENSMUSG00000029797	Sspo	SCO-spondin	uc029vvf.1;uc009bue.1;uc012eld.1;uc009buf.1;uc009bug.1;uc009buh.1;uc009bui.1;uc009buj.1	243369;68910;68910;68910;68910;68910;68910;68910	0;0;0;0;0;0;0;0
chr10	78362516	78397380	34865	*	9.11	9.44	8.69	0.75	2.39e-14	1.51e-12	707.19	680.1	407	419.29	Exon (uc033fqp.1/uc033fqp.1, exon 1 of 1)	10	78274072	78352442	78371	2	28169	uc007fxr.1	-10074	ENSMUSG00000001211	Agpat3	1-acylglycerol-3-phosphate O-acyltransferase 3	uc007fxs.1;uc011xht.1	18114;18114	15663;15663
chr14	67225860	67246628	20769	*	8.88	9.24	8.42	0.82	2.57e-14	1.62e-12	627.32	579.03	339	344.51	Promoter (<=1kb)	14	67233292	67430952	197661	1	13592	uc007ukw.2	0	ENSMUSG00000022053	Ebf2	early B cell factor 2	uc007ukw.2;uc011znu.2;uc007ukx.2	13592;13592;13592	0;0;0
chr13	63566660	63578167	11508	*	7.56	8.07	6.76	1.3	2.8e-14	1.75e-12	259.45	277.64	116	101.48	Promoter (1-2kb)	13	63511532	63565520	53989	2	19206	uc007qxv.1	-1140	ENSMUSG00000021466	Ptch1	patched 1	uc007qxv.1;uc007qxx.1;uc007qxy.1	19206;19206;19206	-1140;-2125;-1386
chr3	30500385	30527160	26776	*	9.07	9.4	8.64	0.76	3.08e-14	1.92e-12	681.94	667.32	413	385.46	Promoter (<=1kb)	3	30236569	30509487	272919	2	14013	uc008ouv.1	0	ENSMUSG00000027684	Mecom	MDS1 and EVI1 complex locus	uc008our.1;uc008ouv.1	14013;14013	0;0
chr11	5896181	5914474	18294	*	8.3	8.71	7.71	1	3.26e-14	2.02e-12	408.42	430.47	214	205.64	Promoter (<=1kb)	11	5896637	5898782	2146	2	17898	uc007hxl.1	0	ENSMUSG00000020469	Myl7	myosin, light polypeptide 7, regulatory	uc033ftt.2;uc007hxn.3;uc007hxo.2;uc007hxl.1	103988;103988;103988;17898	0;0;0;0
chr17	36198886	36252658	53773	*	10.03	10.28	9.74	0.54	3.44e-14	2.12e-12	1244.3	1237.22	854	854.6	Exon (uc008ckp.1/uc008ckp.1, exon 1 of 4)	17	36255673	36257846	2174	2	67676	uc008ckq.1	5188	ENSMUSG00000024446	Rpp21	ribonuclease P 21 subunit	uc008ckq.1;uc008ckr.1	67676;67676	5188;5188
chr13	53447621	53478734	31114	*	9.14	9.47	8.71	0.76	3.78e-14	2.32e-12	744.01	674.62	409	428.19	Promoter (<=1kb)	13	53466881	53472780	5900	2	17702	uc007qnw.1	0	ENSMUSG00000021469	Msx2	msh homeobox 2	uc007qnl.2;uc007qnm.2;uc007qnn.2;uc007qnw.1	100040421;100040421;100040421;17702	0;0;0;0
chr8	53120047	53286738	166692	*	11.74	11.58	11.88	-0.3	3.87e-14	2.37e-12	3060.06	3055.29	3817	3735.32	Distal Intergenic	8	53511702	53523422	11721	1	11593	uc009lrz.2	-224964	ENSMUSG00000031521	Aga	aspartylglucosaminidase	NA	NA	NA
chr9	99859244	99922637	63394	*	10.08	10.33	9.78	0.55	4.04e-14	2.45e-12	1287.33	1280.45	837	916.03	Promoter (<=1kb)	9	99874106	99876170	2065	2	20669	uc012gzb.1	0	ENSMUSG00000053747	Sox14	SRY (sex determining region Y)-box 14	uc012gzb.1	20669	0
chr5	33541041	33580874	39834	*	9.25	9.56	8.86	0.71	4.16e-14	2.52e-12	745.67	767.78	456	471.81	Distal Intergenic	5	33600353	33629635	29283	2	74504	uc008xat.2	48761	ENSMUSG00000037339	Fam53a	family with sequence similarity 53, member A	NA	NA	NA
chr15	97995823	98015854	20032	*	8.5	8.9	7.96	0.94	4.44e-14	2.67e-12	462.22	491.96	237	260.83	Promoter (<=1kb)	15	97975602	98004724	29123	2	12824	uc007xlp.2	0	ENSMUSG00000022483	Col2a1	collagen, type II, alpha 1	uc007xlp.2;uc007xlq.2	12824;12824	0;0
chr2	44509537	44545849	36313	*	9.28	9.59	8.89	0.7	4.45e-14	2.67e-12	757.67	780.57	482	466.47	Exon (uc008joy.1/uc008joy.1, exon 3 of 3)	2	44564412	44571347	6936	2	227835	uc008joz.2	25498	ENSMUSG00000036890	Gtdc1	glycosyltransferase-like domain containing 1	NA	NA	NA
chr11	57826049	57841725	15677	*	8.47	8.86	7.92	0.94	4.49e-14	2.68e-12	478.77	452.39	231	252.82	Promoter (<=1kb)	11	57828713	57832147	3435	2	15110	uc007jaf.1	0	ENSMUSG00000037335	Hand1	heart and neural crest derivatives expressed 1	uc007jaf.1	15110	0
chr8	70040393	70133949	93557	*	10.79	11	10.54	0.46	4.51e-14	2.68e-12	2001.55	2096.93	1420	1559.65	Promoter (<=1kb)	8	70102524	70102586	63	2	102465646	uc033jfx.1	0	ENSMUSG00000099042	Mir7066	microRNA 7066	uc033jfx.1;uc009lyp.2;uc009lyq.2;uc009lys.2;uc009lyt.1;uc009lyu.1;uc009lyr.1;uc009lym.1;uc009lyn.1;uc009lyo.1;uc009lyj.2;uc009lyk.2;uc012geq.1;uc012ger.1;uc009lyl.1;uc009lyv.3;uc009lyw.3;uc033jfy.2	102465646;107770;107770;13004;19727;19727;330790;70616;70616;70616;74549;74549;74549;74549;74549;75692;75692;75692	0;0;0;0;0;0;0;0;0;0;0;0;0;0;0;0;0;0
chr8	58732297	58972716	240420	*	12.3	12.16	12.43	-0.27	4.9e-14	2.9e-12	4627.53	4537.27	5628	5399.12	Promoter (<=1kb)	8	58911755	58914298	2544	1	234290	uc009ltd.1	0	ENSMUSG00000049946	BC030500	cDNA sequence BC030500	uc009ltd.1;uc012gea.2;uc009ltc.1	234290;270049;270049	0;0;0
chr19	59448796	59476047	27252	*	9.17	9.5	8.74	0.76	5.17e-14	3.04e-12	764.29	680.1	426	428.19	Promoter (<=1kb)	19	59458690	59465357	6668	1	13797	uc008ibl.1	0	ENSMUSG00000043969	Emx2	empty spiracles homeobox 2	uc008ibl.1;uc012bod.1	13797;329078	0;0
chr2	172719423	172743208	23786	*	8.6	8.97	8.09	0.88	5.35e-14	3.13e-12	502.35	501.1	270	275.07	Distal Intergenic	2	172550991	172558622	7632	1	21420	uc008oda.3	168432	ENSMUSG00000028640	Tfap2c	transcription factor AP-2, gamma	NA	NA	NA
chr14	12335062	12360968	25907	*	8.92	9.27	8.46	0.8	5.75e-14	3.36e-12	640.15	592.43	341	364.99	Promoter (<=1kb)	14	12341892	12345844	3953	2	54713	uc007sft.2	0	ENSMUSG00000021743	Fezf2	Fez family zinc finger 2	uc007sft.2;uc007sfs.2	54713;54713	0;0
chr5	101642559	101679415	36857	*	9.4	9.69	9.03	0.66	6.56e-14	3.81e-12	832.15	819.53	523	521.66	Promoter (<=1kb)	5	101659184	101664711	5528	2	18096	uc008yim.2	0	ENSMUSG00000035187	Nkx6-1	NK6 homeobox 1	uc008yim.2	18096	0
chr18	35639905	35661014	21110	*	8.46	8.86	7.93	0.93	7.76e-14	4.49e-12	449.39	476.74	247	239.47	Promoter (<=1kb)	18	35650351	35655199	4849	2	381148	uc033hgc.1	0	ENSMUSG00000073600	Prob1	proline rich basic protein 1	uc033hgc.1;uc008emm.2;uc008emn.1;uc008emo.2;uc008emp.2	381148;69816;71242;71242;71242	0;0;0;0;0
chr8	34109560	34656988	547429	*	13.31	13.41	13.2	0.21	8.29e-14	4.78e-12	10886.3	10851.2	9266	9502.98	Promoter (<=1kb)	8	34166622	34166712	91	2	102465211	uc033jey.1	0	ENSMUSG00000098785	Mir6395	microRNA 6395	uc033jey.1;uc057aky.2;uc009lko.4;uc057akz.2;uc057ala.2;uc012gch.1;uc029wsg.1;uc012gci.1;uc009lkp.1	102465211;22428;22428;22428;22428;234155;330734;67887;68192	0;0;0;0;0;0;0;0;0
chr5	147182322	147194886	12565	*	8.15	8.58	7.53	1.05	9.46e-14	5.42e-12	392.28	371.41	198	171.81	Promoter (<=1kb)	5	147188696	147190947	2252	1	14842	uc009anw.2	0	ENSMUSG00000053129	Gsx1	GS homeobox 1	uc009anw.2	14842	0
chr17	35417835	35444703	26869	*	9.66	9.93	9.33	0.6	9.49e-14	5.42e-12	986.09	966.88	641	647.18	Promoter (<=1kb)	17	35424877	35428382	3506	1	110557	uc008chp.3	0	ENSMUSG00000073409	H2-Q6	histocompatibility 2, Q region locus 6	uc008chp.3;uc008chq.3;uc008chr.1;uc057bjk.1;uc008chs.2;uc012arh.1;uc012ari.1;uc008chb.2	110557;110557;110557;15018;15018;15018;15018;53817	0;0;0;0;0;0;0;0
chr13	36717337	36742195	24859	*	8.95	9.28	8.51	0.77	1e-13	5.69e-12	621.11	623.48	353	375.67	Promoter (<=1kb)	13	36725622	36734477	8856	2	68404	uc007qcm.3	0	ENSMUSG00000039114	Nrn1	neuritin 1	uc007qcm.3	68404	0
chr15	35283012	35342627	59616	*	10.07	10.31	9.78	0.53	1.03e-13	5.81e-12	1257.13	1273.75	898	857.27	Promoter (<=1kb)	15	35307010	35328535	21526	2	100126269	uc007vmc.1	0	ENSMUSG00000115453	BC048602	cDNA sequence BC048602	uc007vmc.1;uc007vma.1;uc007vmb.1	100126269;107587;107587	0;0;0
chr17	29883908	29896538	12631	*	7.92	8.37	7.26	1.11	1.11e-13	6.27e-12	338.49	324.53	162	145.1	Promoter (<=1kb)	17	29827958	29887882	59925	2	74762	uc008bto.1	0	ENSMUSG00000043557	Mdga1	MAM domain containing glycosylphosphatidylinositol anchor 1	uc008bto.1	74762	0
chr19	25600780	25625454	24675	*	8.93	9.27	8.47	0.8	1.12e-13	6.3e-12	639.32	596.69	336	373.89	Promoter (<=1kb)	19	25610537	25623921	13385	1	240590	uc008hbk.2	0	ENSMUSG00000042372	Dmrt3	doublesex and mab-3 related transcription factor 3	uc008hbk.2;uc012bju.1;uc012bjv.1	240590;50796;50796	0;0;0
chr7	36672464	36704187	31724	*	8.89	9.23	8.44	0.79	1.26e-13	7.04e-12	614.91	583.29	343	351.63	Promoter (<=1kb)	7	36698118	36773457	75340	1	243931	uc009gkj.1	0	ENSMUSG00000021217	Tshz3	teashirt zinc finger family member 3	uc009gkj.1	243931	0
chr12	99294743	99306270	11528	*	7.65	8.14	6.92	1.21	1.3e-13	7.23e-12	283.87	278.86	129	113.95	Intron (uc007ors.1/71375, intron 3 of 5)	12	99195094	99393072	197979	2	71375	uc007ors.1	86802	ENSMUSG00000033713	Foxn3	forkhead box N3	uc007ors.1;uc007ort.1;uc007oru.1;uc007orv.1	71375;71375;71375;71375	0;0;-3442;-3442
chr11	53456885	53484701	27817	*	9.07	9.39	8.66	0.73	1.74e-13	9.64e-12	658.36	681.93	406	401.48	Promoter (<=1kb)	11	53476578	53480195	3618	2	237761	uc007iwf.1	0	ENSMUSG00000044352	Sowaha	sosondowah ankyrin repeat domain family member A	uc007iwf.1;uc007iwb.1;uc007iwe.1;uc007iwc.2;uc007iwd.2	237761;71774;71774;71774;71774	0;0;0;0;0
chr11	97531215	97558968	27754	*	8.56	8.94	8.06	0.88	1.76e-13	9.69e-12	498.63	481	275	258.16	Exon (uc007lee.1/56013, exon 2 of 20)	11	97509340	97575126	65787	2	56013	uc007lee.1	16158	ENSMUSG00000038453	Srcin1	SRC kinase signaling inhibitor 1	uc007lee.1	56013	0
chr2	115845280	115880246	34967	*	9.2	9.51	8.8	0.72	1.93e-13	1.06e-11	742.77	719.68	471	419.29	Promoter (<=1kb)	2	115861264	115872962	11699	2	17536	uc008lqs.2	0	ENSMUSG00000027210	Meis2	Meis homeobox 2	uc008lqs.2;uc008lqt.2;uc008lqu.2;uc008lqv.2;uc008lqw.2;uc008lqx.2;uc008lqy.2	17536;17536;17536;17536;17536;17536;17536	0;0;0;0;0;0;0
chr1	190153767	190181858	28092	*	8.91	9.24	8.48	0.77	2.09e-13	1.14e-11	605.8	605.82	352	360.53	Promoter (<=1kb)	1	190170296	190217276	46981	1	102632463	uc007ebd.1	0	ENSMUSG00000079045	LOC102632463	uncharacterized LOC102632463	uc007ebd.1;uc033fol.2;uc007ebc.2	102632463;19130;19130	0;0;0
chr5	98162672	98196178	33507	*	9.3	9.63	8.89	0.74	2.35e-13	1.28e-11	853.67	728.2	482	464.69	Promoter (<=1kb)	5	98180869	98187448	6580	1	77630	uc008ygb.1	0	ENSMUSG00000035456	Prdm8	PR domain containing 8	uc008ygb.1	77630	0
chr18	80701002	80719697	18696	*	8.48	8.86	7.96	0.9	2.42e-13	1.31e-11	470.08	458.48	244	254.6	Promoter (<=1kb)	18	80606205	80708173	101969	2	18018	uc012bfk.1	0	ENSMUSG00000033016	Nfatc1	nuclear factor of activated T cells, cytoplasmic, calcineurin dependent 1	uc012bfk.1;uc012bfl.1;uc008fte.2;uc012bfm.1;uc008ftf.2;uc008ftg.2	18018;18018;18018;18018;18018;18018	0;0;0;0;0;0
chr14	118217648	118266651	49004	*	9.97	10.22	9.68	0.54	2.71e-13	1.46e-11	1226.09	1160.5	836	802.08	Promoter (<=1kb)	14	118258634	118258736	103	1	102465149	uc033gsr.1	0	ENSMUSG00000098612	Mir6241	microRNA 6241	uc033gsr.1;uc007uyu.1;uc057bfo.1;uc007uyt.3;uc011zpy.2	102465149;105245869;105245869;223227;668814	0;0;0;0;-507
chr15	76178316	76182444	4129	*	6.42	7.11	5.06	2.05	2.99e-13	1.61e-11	137.38	138.82	25	41.84	Exon (uc007wir.2/18810, exon 31 of 32)	15	76170974	76195710	24737	2	18810	uc007wir.2	13266	ENSMUSG00000022565	Plec	plectin	uc007wir.2;uc007wis.2;uc007wit.2;uc007wiu.2;uc007wjd.2;uc007wiv.2;uc007wiw.2;uc007wjc.2;uc007wix.2;uc007wje.2;uc007wiy.2;uc007wiz.2;uc007wja.2;uc007wjb.2;uc011zuq.1	18810;18810;18810;18810;18810;18810;18810;18810;18810;18810;18810;18810;18810;18810;18810	0;0;0;0;0;0;0;0;0;0;0;0;0;0;0
chr2	147351036	147375330	24295	*	8.9	9.23	8.46	0.77	3.02e-13	1.62e-11	592.15	610.08	365	338.28	Promoter (<=1kb)	2	147364994	147375049	10056	1	18503	uc008msx.3	0	ENSMUSG00000037034	Pax1	paired box 1	uc008msx.3;uc008msy.1;uc008msv.2	18503;18503;99041	0;0;0
chr18	20947850	20955740	7891	*	7.35	7.88	6.52	1.36	3.2e-13	1.71e-11	245.8	224.06	100	83.68	Intron (uc008eez.1/67664, intron 1 of 5)	18	20944625	20983848	39224	1	67664	uc008eez.1	3225	ENSMUSG00000033107	Rnf125	ring finger protein 125	uc008eez.1	67664	0
chr11	44611168	44626882	15715	*	8.22	8.63	7.64	0.99	3.43e-13	1.82e-11	401.39	388.46	210	188.72	Promoter (<=1kb)	11	44618100	44646820	28721	1	13591	uc007inj.2	0	ENSMUSG00000057098	Ebf1	early B cell factor 1	uc007inj.2;uc007ink.2;uc007inl.2;uc007inm.2;uc007inn.2	13591;13591;13591;13591;13591	0;0;0;0;0
chr8	46020440	46345213	324774	*	12.69	12.8	12.56	0.24	3.43e-13	1.82e-11	7193.1	7051.28	5938	6164.7	Promoter (<=1kb)	8	46033261	46116702	83442	2	102141	uc009lpu.2	0	ENSMUSG00000038291	Snx25	sorting nexin 25	uc009lpu.2;uc012gdj.1;uc009lpz.3;uc009lqa.1;uc009lqc.2;uc009lqd.2;uc009lpv.1;uc009lpw.1;uc009lpx.1;uc009lpy.1;uc009lps.1;uc009lpt.1;uc012gdi.1	102141;102141;11739;11739;234219;234219;66756;66756;66756;66756;67620;67620;67620	0;0;0;0;0;0;0;0;0;0;0;0;0
chr14	34811711	34827451	15741	*	8.2	8.62	7.62	0.99	3.49e-13	1.84e-11	389.8	394.55	187	207.42	Promoter (<=1kb)	14	34820136	35581115	760980	1	14803	uc007tbj.1	0	ENSMUSG00000041078	Grid1	glutamate receptor, ionotropic, delta 1	uc007tbj.1	14803	0
chr10	84831763	84865306	33544	*	8.99	9.31	8.58	0.74	3.55e-13	1.87e-11	633.94	639.31	389	374.78	Promoter (<=1kb)	10	84838148	84906538	68391	1	71137	uc007gkw.1	0	ENSMUSG00000020037	Rfx4	regulatory factor X, 4 (influences HLA class II expression)	uc007gkv.1;uc007gkw.1	71137;71137	0;0
chr12	80005432	80029146	23715	*	8.64	9	8.16	0.84	3.66e-13	1.91e-11	513.11	510.84	277	294.66	Distal Intergenic	12	79917019	79936264	19246	2	77290	uc056yrf.1	-69168	ENSMUSG00000112765	9430078K24Rik	RIKEN cDNA 9430078K24 gene	NA	NA	NA
chr6	127325858	127344227	18370	*	8.08	8.5	7.49	1.02	3.68e-13	1.92e-11	364.14	362.28	176	182.49	Distal Intergenic	6	127296186	127307967	11782	2	232386	uc033ivc.1	-17891	ENSMUSG00000107153	Gm38404	predicted gene, 38404	NA	NA	NA
chr2	94236597	94255893	19297	*	8.49	8.87	7.97	0.9	3.85e-13	2e-11	484.15	453	238	262.61	Promoter (<=1kb)	2	94241378	94241442	65	1	102465777	uc033hos.1	0	ENSMUSG00000106336	Mir129b	microRNA 129b	uc033hos.1;uc012bzz.1	102465777;723953	0;0
chr1	19200818	19257512	56695	*	10.01	10.26	9.72	0.54	3.91e-13	2.02e-11	1266.64	1179.37	854	829.67	Promoter (<=1kb)	1	19208914	19238845	29932	1	21419	uc007akq.2	0	ENSMUSG00000025927	Tfap2b	transcription factor AP-2 beta	uc007akq.2;uc007akr.2;uc007aks.1;uc007akt.2;uc007aku.2	21419;21419;21419;21419;21419	0;0;0;0;0
chr18	35914725	35936510	21786	*	8.54	8.91	8.05	0.86	4.67e-13	2.4e-11	482.08	478.57	265	263.5	Exon (uc008emz.1/uc008emz.1, exon 2 of 2)	18	35964830	36014715	49886	1	74002	uc008ena.4	-28320	ENSMUSG00000024347	Psd2	pleckstrin and Sec7 domain containing 2	NA	NA	NA
chr7	43146181	43226707	80527	*	11.05	11.23	10.86	0.37	4.89e-13	2.51e-11	2443.08	2356.31	1846	1859.65	Promoter (<=1kb)	7	43214039	43226842	12804	1	100170401	uc012fjc.1	0	ENSMUSG00000074887	EU599041	expressed sequence EU599041	uc012fjc.1;uc012fjd.1;uc009gmh.1	100170401;100170401;668620	0;0;0
chr8	102254289	102367686	113398	*	11.12	10.93	11.28	-0.36	5.11e-13	2.61e-11	1953.55	1940.46	2491	2489.91	Exon (uc009mzt.1/uc009mzt.1, exon 1 of 3)	8	102632095	102785111	153017	2	12552	uc009mzu.2	417425	ENSMUSG00000031673	Cdh11	cadherin 11	NA	NA	NA
chr17	26830725	26866180	35456	*	9.44	9.72	9.09	0.64	5.24e-13	2.67e-11	866.5	823.8	535	552.82	Promoter (<=1kb)	17	26838665	26841565	2901	2	18091	uc008beo.1	0	ENSMUSG00000015579	Nkx2-5	NK2 homeobox 5	uc008beo.1	18091	0
chr9	100564259	100593163	28905	*	8.98	9.3	8.56	0.74	5.3e-13	2.69e-11	625.67	639.31	367	389.91	Promoter (<=1kb)	9	100552188	100571085	18898	2	245020	uc012gze.1	0	ENSMUSG00000070287	Slc35g2	solute carrier family 35, member G2	uc012gze.1	245020	0
chr18	76835156	76869694	34539	*	9.37	9.66	9	0.66	5.35e-13	2.7e-11	822.22	797.01	538	486.94	Promoter (<=1kb)	18	76856405	76900342	43938	1	664805	uc008fqq.1	0	ENSMUSG00000091519	Skor2	SKI family transcriptional corepressor 2	uc008fqq.1	664805	0
chr8	62250952	62648901	397950	*	13.01	12.9	13.11	-0.21	5.67e-13	2.84e-11	7619.31	7623	8934	8712.48	Distal Intergenic	8	62063421	62123193	59773	2	26359	uc009luq.2	-127759	ENSMUSG00000031635	Anxa10	annexin A10	NA	NA	NA
chr18	84084074	84094117	10044	*	7.17	7.72	6.25	1.47	5.67e-13	2.84e-11	200.28	221.63	67	85.46	Promoter (<=1kb)	18	84011627	84086390	74764	2	110796	uc008ful.1	0	ENSMUSG00000046982	Tshz1	teashirt zinc finger family member 1	uc008ful.1;uc008fum.1;uc008fun.1	110796;110796;225791	0;0;0
chr8	102372251	102887339	515089	*	13.38	13.27	13.48	-0.2	6.18e-13	3.08e-11	9939.08	9879.46	11582	11254.9	Promoter (<=1kb)	8	102632095	102785111	153017	2	12552	uc009mzu.2	0	ENSMUSG00000031673	Cdh11	cadherin 11	uc009mzu.2;uc009mzv.1	12552;12552	0;0
chr4	124876272	124897135	20864	*	8.5	8.88	7.99	0.89	6.2e-13	3.08e-11	477.94	463.96	240	268.84	Promoter (<=1kb)	4	124881785	124886508	4724	1	230735	uc008urh.2	0	ENSMUSG00000028876	Epha10	Eph receptor A10	uc008urh.2;uc008uri.2;uc029uzi.1	230735;230735;73628	0;0;0
chr6	31554214	31572153	17940	*	8.3	8.69	7.76	0.93	6.42e-13	3.18e-11	417.11	411.59	220	213.65	Promoter (<=1kb)	6	31519493	31563937	44445	2	27205	uc009bgh.2	0	ENSMUSG00000025608	Podxl	podocalyxin-like	uc009bgh.2	27205	0
chr4	118728551	118769980	41430	*	9.45	9.73	9.09	0.64	6.45e-13	3.18e-11	834.64	866.42	522	567.95	Promoter (<=1kb)	4	118753595	118754536	942	2	258259	uc008uku.1	0	ENSMUSG00000095218	Olfr1338	olfactory receptor 1338	uc008uku.1;uc008uks.1;uc008ukt.1	258259;258301;258851	0;2302;0
chr8	84580463	84669959	89497	*	10.44	10.65	10.19	0.46	6.57e-13	3.23e-11	1581.96	1641.5	1142	1200.89	Promoter (<=1kb)	8	84601389	84634524	33136	1	12286	uc009mmq.1	0	ENSMUSG00000034656	Cacna1a	calcium channel, voltage-dependent, P/Q type, alpha 1A subunit	uc009mmn.2;uc012ghk.2;uc029wuc.1;uc029wud.1;uc009mmq.1;uc009mmr.2;uc009mmt.1;uc009mmu.2	12286;12286;12286;12286;12286;15936;66830;66830	0;0;0;0;0;0;6547;0
chr1	72938296	72959154	20859	*	8.31	8.71	7.78	0.93	7.23e-13	3.54e-11	419.59	415.25	224	214.54	Exon (uc007bky.1/uc007bky.1, exon 1 of 3)	1	73015074	73015899	826	2	21958	uc007bkz.3	56745	ENSMUSG00000026182	Tnp1	transition protein 1	NA	NA	NA
chr17	23738205	23747309	9105	*	7.67	8.14	6.96	1.17	7.29e-13	3.56e-11	295.45	267.29	125	124.63	Promoter (<=1kb)	17	23743234	23751234	8001	1	638247	uc008ate.1	0	ENSMUSG00000097006	9530082P21Rik	RIKEN cDNA 9530082P21 gene	uc008asz.1;uc008ata.1;uc008atc.1;uc008ate.1;uc008atf.1;uc008atg.1;uc008atd.1;uc008atb.1	268930;268930;268930;638247;638247;638247;73016;76498	11869;11869;1850;0;-1927;-2028;0;0
chr7	142656410	142672045	15636	*	8.26	8.66	7.71	0.95	7.79e-13	3.79e-11	403.87	404.9	201	217.21	Promoter (<=1kb)	7	142659693	142670356	10664	1	111975	uc009koe.1	0	ENSMUSG00000086266	Igf2os	insulin-like growth factor 2, opposite strand	uc009koe.1;uc009kod.3;uc057cbj.1;uc012fxo.1;uc012fxp.2;uc057cbk.1;uc012fxq.1	111975;16002;16002;16002;16002;16002;723874	0;0;0;0;0;0;-1414
chr18	36864057	36980086	116030	*	11.16	11.33	10.97	0.36	8.77e-13	4.25e-11	2611.08	2528.62	2021	1996.74	Promoter (<=1kb)	18	36952648	37841873	889226	1	100384868	uc008eoy.3	0	ENSMUSG00000103458	Gm37013	predicted gene, 37013	uc008eoy.3;uc056zgg.2;uc056zgh.2;uc008eou.1;uc008eot.3;uc008eox.4;uc012bbw.2;uc008epb.4;uc008epc.4;uc008eoz.3;uc008eow.3;uc012bbv.1;uc008eov.3;uc033hgi.1	100384868;103611158;103611159;116731;116731;12936;12937;12937;12939;12941;192163;353234;353234;627427	0;0;0;0;0;0;0;0;0;0;0;0;0;0
chr2	105112900	105147113	34214	*	9.29	9.6	8.89	0.71	9.09e-13	4.39e-11	746.91	804.92	511	438.87	Promoter (<=1kb)	2	105126529	105173614	47086	1	22431	uc008lko.2	0	ENSMUSG00000016458	Wt1	Wilms tumor 1 homolog	uc008lko.2;uc008lkp.1;uc008lkn.1	22431;22431;329480	0;0;0
chr12	73028188	73057093	28906	*	9.13	9.43	8.74	0.69	9.27e-13	4.46e-11	707.6	676.45	431	424.63	Promoter (<=1kb)	12	73041827	73046712	4886	2	20471	uc007nwa.2	0	ENSMUSG00000051367	Six1	sine oculis-related homeobox 1	uc007nwa.2	20471	0
chr4	109972349	109994120	21772	*	8.86	9.19	8.43	0.76	9.79e-13	4.69e-11	604.56	566.85	344	345.4	Promoter (<=1kb)	4	109978025	109983684	5660	1	242620	uc008ucv.1	0	ENSMUSG00000047143	Dmrta2	doublesex and mab-3 related transcription factor like family A2	uc008ucv.1	242620	0
chr4	131908317	131924622	16306	*	7.8	8.25	7.13	1.13	1.02e-12	4.86e-11	325.25	285.56	137	142.43	Promoter (<=1kb)	4	131899478	131920029	20552	2	545681	uc008vai.2	0	ENSMUSG00000085667	Gm12992	predicted gene 12992	uc008vak.4;uc008val.4;uc008vam.4;uc012dma.3;uc008van.4;uc012dmb.1;uc056zxk.1;uc056zxl.1;uc012dmc.1;uc008vai.2;uc033iey.1;uc012dlz.1	269587;269587;269587;269587;269587;269587;269587;269587;269587;545681;545681;623230	0;0;0;0;0;0;0;0;0;0;0;0
chr15	7806314	7818212	11899	*	8.18	8.59	7.61	0.98	1.03e-12	4.92e-11	400.97	368.97	197	194.07	Promoter (<=1kb)	15	7810048	7837580	27533	1	14573	uc007vee.2	0	ENSMUSG00000022144	Gdnf	glial cell line derived neurotrophic factor	uc007vee.2;uc007vef.2;uc056yye.1;uc056yyf.1	14573;14573;14573;14573	0;0;0;0
chr18	42376694	42410527	33834	*	9.29	9.58	8.91	0.67	1.14e-12	5.39e-11	761.39	770.22	507	457.57	Promoter (<=1kb)	18	42394597	42396093	1497	1	18998	uc008etv.2	0	ENSMUSG00000024497	Pou4f3	POU domain, class 4, transcription factor 3	uc008etv.2	18998	0
chr11	116521359	116534370	13012	*	7.92	8.37	7.27	1.1	1.37e-12	6.45e-11	312.01	350.1	143	166.47	Promoter (<=1kb)	11	116531911	116536675	4765	1	20698	uc007mlg.2	0	ENSMUSG00000061878	Sphk1	sphingosine kinase 1	uc007mlg.2;uc007mlh.2;uc007mli.2;uc007mlj.2;uc007mlk.1;uc007mll.2;uc007mlm.1;uc007mln.1	20698;20698;20698;20698;20698;20698;217342;217342	0;0;0;0;-370;-370;9650;47077
chr8	98437113	98692539	255427	*	12.31	12.19	12.43	-0.24	1.39e-12	6.56e-11	4722.29	4593.89	5540	5485.47	Distal Intergenic	8	99007127	99032740	25614	1	100873092	uc057lxr.1	-314588	ENSMUSG00000089819	Gm15679	predicted gene 15679	NA	NA	NA
chr2	10346851	10393001	46151	*	9.65	9.92	9.31	0.6	1.45e-12	6.79e-11	1002.64	930.35	665	606.23	Promoter (<=1kb)	2	10370451	10439137	68687	1	353282	uc008iht.2	0	ENSMUSG00000061186	Sfmbt2	Scm-like with four mbt domains 2	uc008iht.2;uc008ihu.2;uc008ihv.2;uc008ihw.2;uc008ihx.2;uc008ihy.2;uc008ihz.1	353282;353282;353282;353282;353282;353282;353282	0;0;0;0;0;0;-246
chr8	87525728	87670257	144530	*	11.39	11.55	11.22	0.33	1.65e-12	7.69e-11	3017.43	2965.79	2339	2429.38	Promoter (<=1kb)	8	87563907	87589197	25291	1	330820	uc009mqt.1	0	ENSMUSG00000069971	4933402J07Rik	RIKEN cDNA 4933402J07 gene	uc009mqs.1;uc057ami.1;uc009mqt.1;uc009mqu.2;uc057ccj.1;uc009mqv.1	100040294;100040294;330820;73557;94187;94187	0;0;0;0;0;0
chr1	87147765	87158642	10878	*	7.73	8.18	7.05	1.13	1.74e-12	8.12e-11	306.21	275.21	133	132.64	Promoter (<=1kb)	1	87147655	87156136	8482	2	13599	uc007bwd.1	0	ENSMUSG00000026247	Ecel1	endothelin converting enzyme-like 1	uc007bwd.1;uc007bwc.2	13599;13599	0;0
chr14	57723001	57752883	29883	*	8.97	9.3	8.55	0.75	1.86e-12	8.62e-11	609.94	648.44	397	352.52	Promoter (<=1kb)	14	57642029	57746123	104095	2	50523	uc007udj.1	0	ENSMUSG00000021959	Lats2	large tumor suppressor 2	uc007udj.1;uc007udk.1;uc011zmg.1;uc007udl.1;uc007udm.1;uc007udn.1	50523;50523;50523;50523;50523;50523	0;0;0;0;0;0
chr7	38168637	38204988	36352	*	11.07	11.25	10.88	0.37	1.89e-12	8.76e-11	2439.36	2416.59	1833	1935.31	Promoter (<=1kb)	7	38183217	38197568	14352	1	72244	uc009gks.2	0	ENSMUSG00000054676	1600014C10Rik	RIKEN cDNA 1600014C10 gene	uc009gks.2;uc009gkt.2	72244;72244	0;0
chr4	44694358	44731310	36953	*	9.37	9.66	9.01	0.65	1.94e-12	8.91e-11	834.64	781.18	496	535.02	Promoter (<=1kb)	4	44531506	44710440	178935	2	18507	uc008srx.1	0	ENSMUSG00000014030	Pax5	paired box 5	uc008srx.1;uc033ibu.1	18507;70602	0;0
chr3	9229797	9268810	39014	*	9.23	9.52	8.87	0.66	1.94e-12	8.91e-11	741.94	730.64	472	462.91	Promoter (<=1kb)	3	9250567	9285333	34767	1	229055	uc008ooy.3	0	ENSMUSG00000069114	Zbtb10	zinc finger and BTB domain containing 10	uc008ooy.3	229055	0
chr4	129740380	129776585	36206	*	8.86	9.18	8.44	0.75	2e-12	9.14e-11	588.01	574.77	348	345.4	Promoter (<=1kb)	4	129703169	129742303	39135	2	20218	uc008uyc.2	0	ENSMUSG00000028790	Khdrbs1	KH domain containing, RNA binding, signal transduction associated 1	uc008uyc.2;uc008uyd.3;uc008uye.2	20218;20218;20218	0;0;0
chr8	83974862	84069163	94302	*	10.71	10.9	10.48	0.42	2.02e-12	9.22e-11	1861.69	1966.64	1408	1455.49	Promoter (<=1kb)	8	84011515	84011633	119	2	100316677	uc012ggx.1	0	ENSMUSG00000080665	Mir1199	microRNA 1199	uc012ggx.1;uc033jgj.1;uc009mll.4;uc009mlm.3;uc009mlt.2;uc009mlu.2;uc009mlv.2;uc009mls.1;uc009mlr.2;uc009mln.1;uc009mlk.1;uc009mlp.2;uc012ggu.1;uc012ggv.1;uc012ggw.1;uc009mlq.1;uc012ggy.1	100316677;102466886;18747;18747;19724;19724;19724;212108;50931;666704;66929;70134;73453;73453;73453;74337;74337	0;0;0;0;0;0;0;0;0;0;0;0;0;0;0;0;0
chr14	32450925	32466424	15500	*	8	8.42	7.4	1.01	2.15e-12	9.76e-11	342.21	340.97	165	173.59	Promoter (<=1kb)	14	32408203	32465909	57707	2	12647	uc007syv.1	0	ENSMUSG00000021919	Chat	choline acetyltransferase	uc007syv.1;uc007syw.1;uc011zil.1;uc007syx.1;uc007syy.1;uc011zim.1;uc007syz.1;uc007sza.1;uc007szb.1	12647;12647;12647;12647;12647;12647;12647;12647;20508	0;0;0;0;0;0;0;0;0
chr13	120020524	120027802	7279	*	8.42	8.79	7.91	0.88	2.53e-12	1.15e-10	447.32	440.21	254	227	Distal Intergenic	13	120034605	120052204	17600	2	100861753	uc029sds.2	24402	ENSMUSG00000095609	Gm21188	predicted gene, 21188	NA	NA	NA
chr12	80513016	80527493	14478	*	7.95	8.38	7.35	1.03	2.72e-12	1.23e-10	334.76	329.4	157	169.14	Promoter (<=1kb)	12	80518471	80603896	85426	1	108760	uc007oaw.1	0	ENSMUSG00000021130	Galnt16	polypeptide N-acetylgalactosaminyltransferase 16	uc007oaw.1;uc007oax.1;uc007oay.1;uc029rty.1	108760;108760;108760;69522	0;0;0;0
chr16	35143357	35159306	15950	*	8.2	8.6	7.65	0.96	3.05e-12	1.37e-10	380.7	396.98	189	211.87	Promoter (<=1kb)	16	35155636	35304549	148914	1	224129	uc007zbj.1	0	ENSMUSG00000022840	Adcy5	adenylate cyclase 5	uc007zbj.1	224129	0
chr8	101717274	101961214	243941	*	12.2	12.07	12.31	-0.24	3.09e-12	1.39e-10	4304.77	4284.59	5154	5021.67	Distal Intergenic	8	102632095	102785111	153017	2	12552	uc009mzu.2	823897	ENSMUSG00000031673	Cdh11	cadherin 11	NA	NA	NA
chr17	56470893	56487207	16315	*	8.01	8.43	7.42	1.01	3.24e-12	1.45e-10	332.28	355.58	171	170.92	Promoter (<=1kb)	17	56412426	56476480	64055	2	19280	uc008dby.2	0	ENSMUSG00000013236	Ptprs	protein tyrosine phosphatase, receptor type, S	uc008dby.2;uc008dbz.2;uc008dca.2;uc008dcb.2;uc008dcc.2;uc008dcd.2	19280;19280;19280;19280;19280;19280	0;0;0;0;0;0
chr11	95820931	95833550	12620	*	7.67	8.12	7	1.12	3.25e-12	1.45e-10	277.25	280.08	124	131.75	Promoter (<=1kb)	11	95824500	95832140	7641	1	237928	uc007las.2	0	ENSMUSG00000050860	Phospho1	phosphatase, orphan 1	uc007lap.1;uc007las.2;uc007lat.2;uc011ydb.1	237928;237928;66610;66610	0;0;0;0
chr7	98826464	98846509	20046	*	8.45	8.82	7.96	0.85	3.49e-12	1.55e-10	451.46	451.17	250	249.26	Promoter (<=1kb)	7	98835112	98854747	19636	1	22411	uc009ikv.3	0	ENSMUSG00000015957	Wnt11	wingless-type MMTV integration site family, member 11	uc009ikv.3;uc009ikw.3;uc009ikx.2;uc012fpu.1	22411;22411;22411;22411	0;0;0;0
chr12	56675346	56714436	39091	*	9.64	9.91	9.3	0.61	3.53e-12	1.56e-10	974.09	951.05	680	584.87	Promoter (<=1kb)	12	56695471	56712822	17352	1	18511	uc007npi.2	0	ENSMUSG00000001497	Pax9	paired box 9	uc007npi.2;uc011ymc.1;uc007npj.2	18511;217593;217593	0;0;0
chr4	9841809	9863336	21528	*	8.76	9.09	8.33	0.76	3.61e-12	1.59e-10	546.22	544.33	327	315.13	Promoter (<=1kb)	4	9844372	9862345	17974	1	242316	uc008ryt.1	0	ENSMUSG00000051279	Gdf6	growth differentiation factor 6	uc008ryt.1	242316	0
chr7	45163175	45190111	26937	*	8.73	9.09	8.26	0.83	3.82e-12	1.67e-10	529.66	561.37	276	336.5	Promoter (<=1kb)	7	45176349	45179597	3249	2	100039953	uc012fkd.1	0	ENSMUSG00000095276	Gfy	golgi-associated olfactory signaling regulator	uc012fkd.1;uc033izg.1;uc009gtz.1;uc009gua.1;uc009gub.1;uc009gtv.1;uc009gtw.2;uc033izf.1;uc009gtx.2;uc009gty.1	100039953;102465638;114640;114640;384619;68845;68845;68845;72961;72961	0;0;0;0;0;8872;8872;7229;0;0
chr8	59343512	59614693	271182	*	12.45	12.33	12.56	-0.22	3.83e-12	1.67e-10	5142.3	5163.79	6065	5973.3	Distal Intergenic	8	59825649	59844721	19073	1	75017	uc057alo.1	-210956	ENSMUSG00000110406	4930470O06Rik	RIKEN cDNA 4930470O06 gene	NA	NA	NA
chr1	152934818	152961430	26613	*	9	9.32	8.6	0.72	3.91e-12	1.71e-10	664.56	611.91	401	373	Promoter (<=1kb)	1	152955101	153119261	164161	1	226518	uc007czq.1	0	ENSMUSG00000042751	Nmnat2	nicotinamide nucleotide adenylyltransferase 2	uc007czq.1;uc011wts.1	226518;226518	0;0
chr11	112758962	112791452	32491	*	8.95	9.27	8.54	0.73	4.5e-12	1.96e-10	625.25	612.52	350	395.25	Promoter (<=1kb)	11	112782210	112787757	5548	1	20682	uc007med.2	0	ENSMUSG00000000567	Sox9	SRY (sex determining region Y)-box 9	uc007mee.2;uc056ypd.1;uc007med.2;uc007mec.1	100038732;100038732;20682;217294	7556;7556;0;0
chr4	129094108	129126429	32322	*	8.8	9.13	8.36	0.76	5.02e-12	2.18e-10	542.49	576.6	321	338.28	Promoter (<=1kb)	4	129111570	129118967	7398	2	15444	uc008uwc.2	0	ENSMUSG00000028785	Hpca	hippocalcin	uc008uwc.2;uc033iet.1;uc008uwd.3;uc008uwb.3;uc033ieu.1;uc008uvz.2;uc008uwa.2;uc056zxf.1	15444;15444;15444;15444;15444;66260;66260;66260	0;0;0;0;0;0;0;0
chr7	24942326	24958671	16346	*	8.07	8.48	7.5	0.98	5.21e-12	2.25e-10	370.77	344.01	188	174.48	Distal Intergenic	7	24970010	24970075	66	2	102465633	uc033ixn.1	11404	ENSMUSG00000098802	Mir7046	microRNA 7046	NA	NA	NA
chr15	99085900	99100384	14485	*	8.16	8.55	7.61	0.94	5.23e-12	2.25e-10	378.63	372.63	193	198.52	Promoter (<=1kb)	15	99084754	99087728	2975	2	239659	uc007xot.1	0	ENSMUSG00000001076	C1ql4	complement component 1, q subcomponent-like 4	uc007xot.1;uc007xou.2;uc007xor.2;uc007xos.2	239659;72778;78733;78733	0;0;10927;10927
chr15	101032837	101056035	23199	*	8.6	8.95	8.14	0.81	6.24e-12	2.68e-10	480.84	505.97	276	286.65	Promoter (<=1kb)	15	101050192	101054399	4208	2	668225	uc029sve.2	0	ENSMUSG00000095440	Fignl2	fidgetin-like 2	uc007xsh.2;uc007xsj.3;uc057bhc.1;uc029sve.2	20273;20273;20273;668225	0;0;0;0
chr1	192827355	192876807	49453	*	9.6	9.86	9.29	0.58	6.26e-12	2.68e-10	931.05	933.39	599	650.74	Promoter (<=1kb)	1	192854928	192856856	1929	1	100503471	uc007edt.3	0	NA	Gm15867	predicted gene 15867	uc007edt.3;uc011wyx.1;uc007eds.2;uc007edr.2	100503471;214791;214791;73455	0;0;0;0
chr8	75186125	75300985	114861	*	11.13	11.29	10.95	0.34	6.65e-12	2.83e-10	2521.29	2485.39	1945	2001.19	Promoter (<=1kb)	8	75213944	75224113	10170	1	75141	uc009mhg.2	0	ENSMUSG00000034472	Rasd2	RASD family, member 2	uc009mhg.2	75141	0
chr9	94649334	94686964	37631	*	9.21	9.49	8.85	0.65	7.63e-12	3.24e-10	724.15	717.85	452	470.03	Promoter (<=1kb)	9	94669892	95230452	560561	1	331004	uc009ray.2	0	ENSMUSG00000031129	Slc9a9	solute carrier family 9 (sodium/hydrogen exchanger), member 9	uc009ray.2	331004	0
chr11	75165089	75176272	11184	*	7.62	8.09	6.91	1.18	7.76e-12	3.29e-10	254.07	290.43	132	108.61	Promoter (<=1kb)	11	75164565	75168152	3588	2	15248	uc007kdc.1	0	ENSMUSG00000043099	Hic1	hypermethylated in cancer 1	uc007kcz.1;uc011xze.1;uc007kdc.1;uc007kdd.1;uc007kdf.1;uc007kdg.1;uc011xzh.1;uc011xzg.1	103677;103677;15248;15248;246257;246257;387150;387208	239217;236096;0;0;0;0;0;0
chr6	31214433	31260606	46174	*	9.6	9.85	9.28	0.57	8.22e-12	3.47e-10	948.43	903.56	641	603.56	Promoter (<=1kb)	6	31093563	31218474	124912	2	232685	uc033ioo.1	0	ENSMUSG00000044471	Lncpint	long non-protein coding RNA, Trp53 induced transcript	uc033ioo.1;uc009bfy.2;uc033iop.1;uc033ioq.1;uc009bfz.3;uc009bga.3;uc012ejs.3;uc029vtz.2;uc029vua.2;uc029vub.2	232685;232685;232685;232685;73652;73652;73652;73652;73652;73652	0;0;0;0;0;0;0;0;0;0
chr17	56504056	56514772	10717	*	7.43	7.92	6.7	1.22	8.29e-12	3.49e-10	249.94	233.2	96	111.28	Promoter (<=1kb)	17	56511248	56512483	1236	2	20834	uc008dce.1	0	ENSMUSG00000044526	Znrf4	zinc and ring finger 4	uc008dce.1	20834	0
chr4	115049679	115066820	17142	*	8.62	8.98	8.13	0.85	8.46e-12	3.55e-10	508.15	504.75	250	311.57	Promoter (<=1kb)	4	115056426	115071755	15330	1	21349	uc008uem.2	0	ENSMUSG00000028717	Tal1	T cell acute lymphocytic leukemia 1	uc008uem.2;uc008uek.1;uc008uel.1	21349;21349;21349	0;0;0
chr6	72222591	72240251	17661	*	8.01	8.42	7.43	0.98	8.64e-12	3.61e-10	345.94	337.92	166	179.82	Promoter (<=1kb)	6	72206177	72235577	29401	2	71093	uc009cic.2	0	ENSMUSG00000037621	Atoh8	atonal bHLH transcription factor 8	uc009cic.2;uc012enh.2	71093;71093	0;0
chr1	138824110	138853650	29541	*	9.25	9.53	8.9	0.64	9.14e-12	3.81e-10	751.05	731.86	467	487.83	Promoter (<=1kb)	1	138825186	138842444	17259	2	16876	uc007cvr.1	0	ENSMUSG00000019230	Lhx9	LIM homeobox protein 9	uc007cvr.1;uc007cvs.1;uc007cvt.1;uc007cvu.2;uc007cvv.1;uc007cvw.1	16876;16876;16876;16876;69549;69549	0;0;0;0;0;0
chr3	89316267	89322585	6319	*	7.1	7.64	6.24	1.39	9.22e-12	3.83e-10	210.21	187.53	83	68.55	Promoter (<=1kb)	3	89314951	89322879	7929	2	13638	uc008pyq.1	294	ENSMUSG00000028039	Efna3	ephrin A3	uc008pyq.1	13638	0
chr12	118830055	118869958	39904	*	9.6	9.85	9.29	0.56	9.29e-12	3.85e-10	912.84	934.61	633	617.81	Promoter (<=1kb)	12	118846329	118852578	6250	1	320145	uc007pih.2	0	ENSMUSG00000048562	Sp8	trans-acting transcription factor 8	uc007pih.2;uc007pig.2;uc033ggm.1;uc007pij.2	320145;320145;77706;77706	0;0;0;0
chr9	48826130	48840182	14053	*	7.9	8.32	7.3	1.02	9.31e-12	3.85e-10	324.83	315.39	150	165.58	Promoter (<=1kb)	9	48654297	48835945	181649	2	235320	uc009pil.1	0	ENSMUSG00000066687	Zbtb16	zinc finger and BTB domain containing 16	uc009pil.1;uc009pim.1;uc009pin.1	235320;235320;235320	0;0;0
chr2	130293861	130305992	12132	*	7.75	8.19	7.11	1.08	1.01e-11	4.17e-10	304.14	280.08	131	145.1	Promoter (<=1kb)	2	130295939	130370481	74543	1	228598	uc008mio.2	0	ENSMUSG00000053552	Ebf4	early B cell factor 4	uc008mio.2;uc008mip.2;uc008miq.2;uc012cec.1;uc012ced.1	228598;228598;228598;228598;228598	0;0;0;0;0
chr2	180770757	180787510	16754	*	8.15	8.55	7.61	0.94	1.05e-11	4.33e-10	375.32	372.63	186	204.75	Promoter (<=1kb)	2	180774381	180776900	2520	2	140489	uc008okb.2	0	ENSMUSG00000045493	Bhlhe23	basic helix-loop-helix family, member e23	uc008okb.2	140489	0
chr4	154631060	154653544	22485	*	8.6	8.94	8.15	0.79	1.12e-11	4.57e-10	500.29	482.22	289	277.75	Promoter (<=1kb)	4	154630691	154636367	5677	2	320939	uc008wby.2	0	NA	5930403L14Rik	RIKEN cDNA 5930403L14 gene	uc008wby.2;uc008wbu.1;uc008wbv.1;uc008wbw.1;uc008wbx.1	320939;70673;70673;70673;70673	0;0;0;0;0
chr8	42273336	42486642	213307	*	12.09	11.96	12.22	-0.26	1.18e-11	4.83e-10	4014.69	3935.71	4894	4633.54	Distal Intergenic	8	41827267	42046202	218936	1	69966	uc029wst.1	446069	ENSMUSG00000102046	2810404M03Rik	RIKEN cDNA 2810404M03 gene	NA	NA	NA
chr2	164380835	164415329	34495	*	9.06	9.36	8.67	0.69	1.19e-11	4.86e-10	685.67	627.74	408	406.83	Promoter (<=1kb)	2	164389393	164404818	15426	2	17183	uc008num.3	0	ENSMUSG00000016995	Matn4	matrilin 4	uc008num.3;uc029uia.1;uc008nun.3;uc008nuo.1;uc008nup.1	17183;17183;17183;19668;19668	0;0;0;0;0
chr4	135149320	135155374	6055	*	7.15	7.66	6.33	1.33	1.32e-11	5.33e-10	196.14	209.45	78	82.79	Promoter (<=1kb)	4	135152496	135171258	18763	1	12399	uc008vgc.1	0	ENSMUSG00000070691	Runx3	runt related transcription factor 3	uc008vgb.1;uc008vgc.1	12399;12399	0;0
chr2	153633211	153653619	20409	*	8.37	8.74	7.88	0.86	1.35e-11	5.47e-10	423.32	431.69	235	237.69	Promoter (<=1kb)	2	153649449	153687730	38282	1	13436	uc008nib.3	0	ENSMUSG00000027478	Dnmt3b	DNA methyltransferase 3B	uc008nib.3;uc008nic.3;uc008nid.3;uc008nie.3;uc008nif.3;uc008nig.3;uc008nih.3;uc008nii.3;uc008nij.3;uc008nhx.2;uc008nhy.2;uc008nhz.3;uc008nia.2	13436;13436;13436;13436;13436;13436;13436;13436;13436;99311;99311;99311;99311	0;0;0;0;0;0;0;0;0;-430;-430;-430;-430
chr7	79568975	79595011	26037	*	8.79	9.11	8.37	0.74	1.46e-11	5.89e-10	542.49	564.42	328	335.61	3' UTR	7	79593363	79617657	24295	2	56315	uc009hyo.2	22646	ENSMUSG00000030549	Rhcg	Rhesus blood group-associated C glycoprotein	uc009hyo.2	56315	0
chr2	36088353	36121007	32655	*	9.24	9.53	8.89	0.64	1.5e-11	6.02e-10	753.12	725.16	497	450.45	Promoter (<=1kb)	2	36081953	36104060	22108	2	16874	uc008jld.1	0	ENSMUSG00000026890	Lhx6	LIM homeobox protein 6	uc008jld.1;uc008jle.1;uc008jlf.1;uc008jlg.1;uc008jlh.2;uc008jli.2;uc012bun.1;uc012buo.1	16874;16874;16874;16874;67889;67889;67889;67889	0;0;0;0;0;0;0;0
chr8	47326918	47465430	138513	*	11.37	11.52	11.21	0.31	1.51e-11	6.04e-10	2946.26	2913.42	2377	2355.49	Promoter (<=1kb)	8	47180048	47352348	172301	2	71069	uc009lqv.2	0	ENSMUSG00000038143	Stox2	storkhead box 2	uc009lqv.2	71069	0
chr8	49616632	49834564	217933	*	12.19	12.06	12.31	-0.25	1.51e-11	6.04e-10	4296.08	4246.23	5193	4948.67	Distal Intergenic	8	50368112	50416089	47978	1	100039954	uc029wsx.1	-533548	ENSMUSG00000110281	Gm2516	predicted gene 2516	NA	NA	NA
chr8	98846525	99072326	225802	*	12.2	12.08	12.31	-0.23	1.6e-11	6.35e-10	4321.73	4318.69	5074	5071.52	Promoter (<=1kb)	8	99007127	99032740	25614	1	100873092	uc057lxr.1	0	ENSMUSG00000089819	Gm15679	predicted gene 15679	uc057lxr.1;uc009mzm.2;uc033jhb.1;uc009mzn.2;uc009mzo.2	100873092;12564;12564;12564;12564	0;0;0;0;0
chr13	69733323	69742411	9089	*	7.3	7.79	6.55	1.24	1.81e-11	7.18e-10	224.69	217.37	93	94.36	Promoter (<=1kb)	13	69702832	69739897	37066	2	76980	uc007rcp.2	0	ENSMUSG00000052981	Ube2ql1	ubiquitin-conjugating enzyme E2Q family-like 1	uc007rcp.2	76980	0
chr3	93427942	93457547	29606	*	9.18	9.47	8.82	0.66	1.89e-11	7.46e-10	716.7	705.68	427	476.26	Promoter (<=1kb)	3	93442330	93449077	6748	1	99681	uc012cti.1	0	ENSMUSG00000052415	Tchh	trichohyalin	uc012cti.1	99681	0
chr4	45636728	45663342	26615	*	8.66	9	8.22	0.78	2.04e-11	8.05e-10	489.11	535.8	296	299.11	Promoter (<=1kb)	4	45640954	45642304	1351	1	100040557	uc008ssv.1	0	ENSMUSG00000085980	Gm12408	predicted gene 12408	uc008ssv.1	100040557	0
chr12	104466353	104480644	14292	*	8.22	8.61	7.69	0.92	2.05e-11	8.05e-10	398.9	381.15	190	221.66	Promoter (<=1kb)	12	104471209	104473236	2028	2	14836	uc007oxh.1	0	ENSMUSG00000021095	Gsc	goosecoid homeobox	uc007oxh.1	14836	0
chr7	49630898	49655773	24876	*	8.85	9.18	8.42	0.75	2.19e-11	8.57e-10	616.56	540.06	341	346.29	Promoter (<=1kb)	7	49631499	49636835	5337	2	13172	uc009hbn.1	0	ENSMUSG00000030507	Dbx1	developing brain homeobox 1	uc009hbn.1	13172	0
chr11	88066677	88110239	43563	*	9.3	9.57	8.96	0.61	2.39e-11	9.35e-10	755.6	765.95	483	510.98	Promoter (<=1kb)	11	88099146	88185355	86210	1	103841	uc007kvg.2	0	ENSMUSG00000018378	Cuedc1	CUE domain containing 1	uc007kvg.2;uc007kvh.2;uc007kvf.2;uc029rng.1	103841;103841;22344;70393	0;0;0;0
chr14	68064338	68133771	69434	*	10.34	10.54	10.1	0.44	2.44e-11	9.51e-10	1526.51	1455.8	1124	1074.48	Promoter (<=1kb)	14	68123752	68131371	7620	1	100043072	uc007ulp.2	0	NA	A230070E04Rik	RIKEN cDNA A230070E04 gene	uc007ulp.2;uc007uln.2;uc007ulo.1	100043072;18039;18040	0;0;0
chr5	147259020	147280669	21650	*	8.71	9.04	8.29	0.75	2.48e-11	9.63e-10	528.42	521.8	303	321.37	Promoter (<=1kb)	5	147270131	147275149	5019	1	18609	uc009any.2	0	ENSMUSG00000029644	Pdx1	pancreatic and duodenal homeobox 1	uc033inv.1;uc009any.2;uc009anx.1	102465309;18609;70147	2629;0;0
chrY	90797458	90814010	16553	*	9.5	9.76	9.17	0.59	2.53e-11	9.79e-10	908.71	829.88	592	559.94	Intron (uc029yhc.1/170942, intron 3 of 3)	21	90784610	90816465	31856	1	170942	uc029yhc.1	12848	ENSMUSG00000096768	Erdr1	erythroid differentiation regulator 1	uc029yhc.1;uc029yhe.1;uc029yhf.1	170942;170942;170942	0;0;0
chr8	26958096	27025861	67766	*	10.39	10.59	10.16	0.42	2.56e-11	9.9e-10	1531.89	1543.48	1132	1162.61	Promoter (<=1kb)	8	27023799	27039437	15639	1	244373	uc009lhr.3	0	ENSMUSG00000031483	Erlin2	ER lipid raft associated 2	uc009lhr.3;uc012gbp.1;uc012gbq.1	244373;353310;353310	0;0;0
chr8	51930572	52264134	333563	*	12.65	12.53	12.76	-0.23	2.83e-11	1.09e-09	5895.83	5895.65	7143	6696.15	Distal Intergenic	8	52356611	52403339	46729	1	330767	uc009lry.1	-92477	ENSMUSG00000110013	1190028D05Rik	RIKEN cDNA 1190028D05 gene	NA	NA	NA
chr6	145848379	145869402	21024	*	8.44	8.79	7.97	0.82	2.87e-11	1.1e-09	437.8	447.52	254	246.59	Promoter (<=1kb)	6	145858243	145865420	7178	2	79362	uc009ert.2	0	ENSMUSG00000030256	Bhlhe41	basic helix-loop-helix family, member e41	uc009ert.2;uc033ivw.1	79362;79362	0;0
chr1	72868329	72899857	31529	*	9	9.29	8.62	0.68	2.88e-11	1.1e-09	643.46	612.52	389	397.03	Promoter (<=1kb)	1	72858065	72874865	16801	2	16011	uc007bkx.1	0	ENSMUSG00000026185	Igfbp5	insulin-like growth factor binding protein 5	uc007bkx.1	16011	0
chr4	46332471	46356839	24369	*	8.82	9.13	8.41	0.72	2.99e-11	1.14e-09	552.42	570.51	328	351.63	Promoter (<=1kb)	4	46344194	46345309	1116	1	110805	uc008sto.1	0	ENSMUSG00000070990	Foxe1	forkhead box E1	uc008sto.1	110805	0
chr14	58061558	58109984	48427	*	9.79	10.02	9.5	0.52	3.01e-11	1.15e-09	1053.95	1028.98	751	700.59	Promoter (<=1kb)	14	58072686	58112720	40035	1	14180	uc007udx.2	0	ENSMUSG00000021974	Fgf9	fibroblast growth factor 9	uc007udx.2;uc007udy.2	14180;14180	0;0
chr7	37762437	37776988	14552	*	8.04	8.45	7.47	0.97	3.08e-11	1.17e-09	362.08	336.09	163	192.29	Promoter (<=1kb)	7	37479109	37769752	290644	2	243937	uc009gkl.1	0	ENSMUSG00000043456	Zfp536	zinc finger protein 536	uc009gkl.1;uc012fip.1;uc009gkm.1;uc009gko.1	243937;243937;243937;243937	0;0;0;0
chr17	6409459	6534744	125286	*	10.86	11.04	10.65	0.39	3.56e-11	1.35e-09	2074.8	2131.64	1530	1680.71	Promoter (<=1kb)	17	6306344	6493172	186829	2	100310872	uc008agm.3	0	ENSMUSG00000092074	Dynlt1a	dynein light chain Tctex-type 1A	uc008agm.3;uc008agq.2;uc008agr.2;uc008ags.1;uc012ajj.1	100310872;21648;547127;547127;547127	0;0;0;0;0
chr8	52433654	52594708	161055	*	11.67	11.53	11.8	-0.27	3.62e-11	1.37e-09	2952.88	2963.96	3582	3553.71	Distal Intergenic	8	52356611	52403339	46729	1	330767	uc009lry.1	77043	ENSMUSG00000110013	1190028D05Rik	RIKEN cDNA 1190028D05 gene	NA	NA	NA
chr10	83424571	83461562	36992	*	9.41	9.67	9.08	0.59	3.69e-11	1.39e-09	844.57	787.26	543	539.47	Exon (uc011xkm.1/uc011xkm.1, exon 1 of 1)	10	83360221	83368835	8615	1	28109	uc007gkg.2	64350	ENSMUSG00000020255	D10Wsu102e	DNA segment, Chr 10, Wayne State University 102, expressed	NA	NA	NA
chr8	59139028	59336896	197869	*	12	11.87	12.12	-0.25	3.71e-11	1.39e-09	3813.59	3686.08	4470	4451.05	Distal Intergenic	8	58911755	58914298	2544	1	234290	uc009ltd.1	227273	ENSMUSG00000049946	BC030500	cDNA sequence BC030500	NA	NA	NA
chr1	4482790	4514671	31882	*	9.25	9.53	8.9	0.63	3.87e-11	1.45e-09	730.77	745.25	502	454.01	Promoter (<=1kb)	1	4490928	4493735	2808	2	20671	uc007aey.1	0	ENSMUSG00000025902	Sox17	SRY (sex determining region Y)-box 17	uc007aey.1;uc007aez.2;uc007afa.2;uc007afb.2;uc007afc.2;uc033fhy.1	20671;20671;20671;20671;20671;20671	0;0;0;0;0;0
chr6	85181801	85196795	14995	*	8.33	8.7	7.83	0.87	3.88e-11	1.45e-09	408.01	422.55	214	241.25	Promoter (<=1kb)	6	85187931	85204463	16533	1	13796	uc009cpi.1	0	ENSMUSG00000033726	Emx1	empty spiracles homeobox 1	uc009cpi.1	13796	0
chr1	155080235	155101934	21700	*	8.46	8.83	7.97	0.86	3.89e-11	1.45e-09	457.25	453	279	220.77	Promoter (<=1kb)	1	155096367	155099636	3270	2	15939	uc007dax.2	0	ENSMUSG00000056708	Ier5	immediate early response 5	uc007dax.2;uc007daw.1	15939;671336	0;0
chr11	82382909	82394138	11230	*	7.54	8	6.87	1.13	3.95e-11	1.46e-09	258.21	252.07	127	106.83	Promoter (<=1kb)	11	82388900	82446361	57462	1	270893	uc007kmv.2	0	ENSMUSG00000020701	Tmem132e	transmembrane protein 132E	uc007kmv.2;uc011yaw.2	270893;270893	0;0
chr19	45730248	45746352	16105	*	8.35	8.72	7.86	0.86	4.13e-11	1.53e-09	408.01	435.34	220	243.92	Promoter (<=1kb)	19	45736798	45742884	6087	2	14179	uc008hrg.2	0	ENSMUSG00000025219	Fgf8	fibroblast growth factor 8	uc008hrg.2;uc008hrh.2;uc008hri.2;uc012bmo.1;uc008hrk.1;uc029tsm.1;uc008hrm.1;uc008hrn.1	14179;14179;14179;14179;18150;71232;76055;76055	0;0;0;0;3211;0;12940;36939
chr5	119796346	119816374	20029	*	8.55	8.89	8.1	0.79	4.17e-11	1.54e-09	486.22	460.91	273	275.96	Exon (uc008zgx.1/uc008zgx.1, exon 1 of 2)	5	119834663	119885218	50556	1	21388	uc008zgz.2	-18289	ENSMUSG00000018263	Tbx5	T-box 5	NA	NA	NA
chr4	120728168	120761512	33345	*	8.88	9.18	8.49	0.7	4.33e-11	1.59e-09	571.46	591.82	365	352.52	Promoter (<=1kb)	4	120697473	120747176	49704	2	60613	uc008unm.1	0	ENSMUSG00000028631	Kcnq4	potassium voltage-gated channel, subfamily Q, member 4	uc008unn.2;uc008uno.2;uc008unp.2;uc008unm.1;uc012dkl.1	18046;18046;18046;60613;60613	0;0;0;0;0
chr5	126740317	126770731	30415	*	8.95	9.25	8.57	0.68	4.42e-11	1.62e-09	615.74	601.56	390	371.22	Distal Intergenic	5	127030789	127088529	57741	1	71247	uc008zrw.1	-260058	ENSMUSG00000105490	4933438B17Rik	RIKEN cDNA 4933438B17 gene	NA	NA	NA
chr2	172932718	172944284	11567	*	7.57	8.02	6.92	1.09	4.55e-11	1.66e-09	260.28	258.16	127	115.73	Promoter (<=1kb)	2	172868012	172940321	72310	2	12162	uc008odb.3	0	ENSMUSG00000008999	Bmp7	bone morphogenetic protein 7	uc008odb.3;uc008odc.2	12162;12162	0;0
chr10	7345402	7395751	50350	*	9.81	10.04	9.54	0.5	4.66e-11	1.7e-09	1056.02	1048.47	735	749.56	Distal Intergenic	10	7444873	7473477	28605	2	77777	uc029qvm.1	77726	ENSMUSG00000079685	Ulbp1	UL16 binding protein 1	NA	NA	NA
chr17	8425402	8438981	13580	*	8.16	8.55	7.63	0.91	4.75e-11	1.73e-09	380.7	367.15	185	211.87	Promoter (<=1kb)	17	8434423	8442496	8074	1	20997	uc008ajq.1	0	ENSMUSG00000062327	T	brachyury, T-box transcription factor T	uc008ajq.1;uc012ajs.2;uc008ajp.1	20997;21331;21331	0;53006;28773
chr18	53460499	53485256	24758	*	9.01	9.3	8.64	0.66	4.85e-11	1.76e-09	638.91	625.31	400	400.59	Promoter (<=1kb)	18	53464546	53575857	111312	1	225518	uc008exv.1	0	ENSMUSG00000069378	Prdm6	PR domain containing 6	uc008exv.1	225518	0
chr5	119034350	119075367	41018	*	9.33	9.59	9	0.59	5.16e-11	1.87e-09	770.08	775.09	506	518.99	Distal Intergenic	5	119108236	119114543	6308	1	73477	uc029vnw.1	-32869	ENSMUSG00000100573	1700081H04Rik	RIKEN cDNA 1700081H04 gene	NA	NA	NA
chr2	29243834	29261108	17275	*	8.09	8.48	7.57	0.91	5.57e-11	2.01e-09	353.39	359.84	190	189.61	Promoter (<=1kb)	2	29194726	29248099	53374	2	171171	uc008izo.2	0	ENSMUSG00000035513	Ntng2	netrin G2	uc008izo.2;uc008izp.2;uc012btf.2;uc008izq.1	171171;171171;171171;76220	0;0;0;0
chr12	117145952	117177045	31094	*	9.06	9.35	8.69	0.66	5.97e-11	2.15e-09	669.53	632	405	421.07	Promoter (<=1kb)	12	117144523	117151269	6747	2	100038689	uc007phz.2	0	ENSMUSG00000099907	Gm10421	predicted gene 10421	uc007phz.2;uc007phx.2;uc011yvq.1	100038689;19276;19276	0;0;0
chr12	110264898	110293992	29095	*	8.79	9.11	8.39	0.72	6.32e-11	2.27e-09	535.87	566.85	325	343.62	Promoter (<=1kb)	12	110278048	110278129	82	2	100526515	uc011yup.1	0	ENSMUSG00000080356	Mir1247	microRNA 1247	uc011yup.1;uc007pbi.1;uc007pbh.2;uc011yum.2;uc011yun.2;uc011yuo.2	100526515;107585;353504;353504;353504;353504	0;0;0;0;0;0
chr2	164965804	164972161	6358	*	7.03	7.55	6.21	1.35	6.41e-11	2.3e-09	179.18	196.66	74	73.89	Promoter (<=1kb)	2	164967988	164999731	31744	1	57138	uc008nwu.2	0	ENSMUSG00000017740	Slc12a5	solute carrier family 12, member 5	uc012cjf.2;uc056zqu.1;uc008nwu.2	57138;57138;57138	0;0;0
chr11	95912930	95919665	6736	*	7.18	7.68	6.41	1.28	6.5e-11	2.32e-09	211.87	199.1	93	76.56	Promoter (<=1kb)	11	95863559	95914871	51313	2	14422	uc007lax.1	0	ENSMUSG00000013418	B4galnt2	beta-1,4-N-acetyl-galactosaminyl transferase 2	uc007lax.1;uc011ydc.1	14422;14422	0;0
chr15	98883238	98900457	17220	*	8.23	8.6	7.74	0.87	6.57e-11	2.34e-09	395.59	382.37	208	218.1	Promoter (<=1kb)	15	98891155	98898540	7386	2	13363	uc007xoh.3	0	ENSMUSG00000023000	Dhh	desert hedgehog	uc007xoh.3;uc011zzb.1;uc007xoi.1	13363;69159;74775	0;-1824;17641
chr7	19810324	19815305	4982	*	6.63	7.21	5.63	1.58	6.68e-11	2.37e-09	148.55	147.95	45	54.3	Promoter (<=1kb)	7	19808462	19811134	2673	2	12051	uc009fnj.1	0	ENSMUSG00000053175	Bcl3	B cell leukemia/lymphoma 3	uc009fnj.1;uc009fnk.2	12051;12051	0;0
chr10	42624601	42637948	13348	*	7.91	8.32	7.36	0.96	7.86e-11	2.78e-09	325.25	311.74	161	166.47	Distal Intergenic	10	42678916	42699991	21076	1	14628	uc007eyu.2	-40968	ENSMUSG00000038280	Ostm1	osteopetrosis associated transmembrane protein 1	NA	NA	NA
chr4	126285793	126308306	22514	*	8.51	8.86	8.06	0.8	8.24e-11	2.91e-09	475.87	451.78	254	280.42	Promoter (<=1kb)	4	126286794	126314330	27537	1	329941	uc008utd.1	0	ENSMUSG00000056174	Col8a2	collagen, type VIII, alpha 2	uc008utd.1	329941	0
chr1	178837048	178868313	31266	*	8.97	9.26	8.6	0.66	8.81e-11	3.1e-09	626.49	602.17	395	381.01	Exon (uc007dvh.2/269152, exon 6 of 15)	1	178529125	178932857	403733	1	269152	uc007dvh.2	307923	ENSMUSG00000026494	Kif26b	kinesin family member 26B	uc007dvh.2	269152	0
chr11	83849245	83858647	9403	*	7.5	7.97	6.81	1.16	8.84e-11	3.1e-09	273.52	228.32	121	103.26	Promoter (<=1kb)	11	83850869	83905917	55049	1	21410	uc007kpx.2	0	ENSMUSG00000020679	Hnf1b	HNF1 homeobox B	uc007kpx.2;uc007kpy.2;uc056ynm.1	21410;21410;21410	0;0;0
chr17	14679445	14707688	28244	*	8.87	9.18	8.47	0.72	9.1e-11	3.19e-09	599.6	562.59	330	377.45	Promoter (<=1kb)	17	14665500	14694262	28763	2	21826	uc008anb.2	0	ENSMUSG00000023885	Thbs2	thrombospondin 2	uc008anb.2	21826	0
chr6	119539184	119550965	11782	*	7.52	7.97	6.86	1.11	9.74e-11	3.4e-09	262.76	238.07	118	114.84	Promoter (<=1kb)	6	119432531	119544347	111817	2	22419	uc009dmi.2	0	ENSMUSG00000030170	Wnt5b	wingless-type MMTV integration site family, member 5B	uc009dmi.2	22419	0
chr8	38055784	38207255	151472	*	11.58	11.44	11.72	-0.28	1.03e-10	3.59e-09	2757.98	2784.95	3443	3292.88	Intron (uc012gck.1/244431, intron 1 of 7)	8	37522554	38248828	726275	2	244431	uc012gck.1	41573	ENSMUSG00000039539	Sgcz	sarcoglycan zeta	uc012gck.1;uc009lme.2	244431;244431	0;0
chr6	51162856	51187424	24569	*	8.97	9.27	8.58	0.69	1.05e-10	3.66e-09	652.15	582.08	392	373.89	Distal Intergenic	6	51269812	51269910	99	2	387166	uc012elv.1	82486	ENSMUSG00000065505	Mir148a	microRNA 148a	NA	NA	NA
chr8	63305232	63473342	168111	*	11.78	11.64	11.9	-0.26	1.09e-10	3.78e-09	3176.75	3210.55	3913	3752.23	3' UTR	8	62951232	63357098	405867	1	72902	uc009lur.2	354000	ENSMUSG00000054162	Spock3	sparc/osteonectin, cwcv and kazal-like domains proteoglycan 3	uc009lur.2;uc033jfr.2;uc057lxj.1	72902;72902;72902	0;0;0
chr14	70500600	70547489	46890	*	9.45	9.71	9.14	0.56	1.09e-10	3.78e-09	832.15	838.41	584	547.48	Promoter (<=1kb)	14	70474555	70508914	34360	2	12153	uc007uob.2	0	ENSMUSG00000022098	Bmp1	bone morphogenetic protein 1	uc007uob.2;uc007uoc.2;uc007uod.2;uc007uoe.3;uc007uof.2;uc007uog.2;uc007uoh.2;uc007uoi.2	12153;12153;12153;20389;213469;213469;213469;72549	0;0;0;0;0;0;0;0
chr5	33817528	33825199	7672	*	6.92	7.45	6.06	1.39	1.14e-10	3.95e-09	173.8	176.57	74	59.64	Promoter (<=1kb)	5	33820744	33870536	49793	1	107823	uc008xbj.2	0	ENSMUSG00000057406	Nsd2	nuclear receptor binding SET domain protein 2	uc008xbj.2;uc012duu.1	107823;107823	0;0
chr11	103768011	103778964	10954	*	7.78	8.2	7.21	0.99	1.3e-10	4.48e-09	288.42	297.74	151	144.21	Promoter (<=1kb)	11	103774175	103818021	43847	1	22415	uc007lvs.2	0	ENSMUSG00000000125	Wnt3	wingless-type MMTV integration site family, member 3	uc007lvs.2	22415	0
chr10	120471597	120483068	11472	*	7.66	8.08	7.04	1.04	1.45e-10	4.98e-09	273.52	269.12	124	139.76	Promoter (<=1kb)	10	120361275	120476935	115661	2	15364	uc007hfb.1	0	ENSMUSG00000056758	Hmga2	high mobility group AT-hook 2	uc007hfb.1;uc011xow.1	15364;15364	0;0
chr4	154950500	154963922	13423	*	7.88	8.28	7.32	0.95	1.46e-10	4.98e-09	307.04	313.57	161	159.35	Promoter (<=1kb)	4	154960923	154962371	1449	1	15208	uc008wck.1	0	ENSMUSG00000048001	Hes5	hes family bHLH transcription factor 5	uc008wck.1;uc008wcl.3;uc008wcm.3;uc012dqn.2	15208;269614;269614;269614	0;-201;-201;-201
chr14	96898625	97031164	132540	*	11.09	10.91	11.25	-0.34	1.48e-10	5.05e-09	1958.93	1883.22	2512	2356.38	Distal Intergenic	14	96105265	96519034	413770	2	93688	uc007uuq.1	-379591	ENSMUSG00000022076	Klhl1	kelch-like 1	NA	NA	NA
chr13	119595933	119602583	6651	*	7.18	7.67	6.42	1.25	1.61e-10	5.47e-09	206.9	200.93	78	93.47	Intron (uc029sdk.1/633640, intron 2 of 2)	13	119488039	119610459	122421	1	633640	uc029sdk.1	107894	ENSMUSG00000074634	Tmem267	transmembrane protein 267	uc029sdk.1;uc029sdm.1	633640;633640	0;0
chr8	92114191	92493353	379163	*	12.78	12.87	12.68	0.19	1.69e-10	5.72e-09	7524.14	7497.58	6564	6596.45	Promoter (<=1kb)	8	92357796	92361456	3661	1	54352	uc009mub.1	0	ENSMUSG00000031737	Irx5	Iroquois homeobox 5	uc009mub.1;uc009mua.3;uc033jgt.1	54352;71296;71296	0;0;0
chr8	62655749	62805163	149415	*	11.6	11.46	11.73	-0.28	1.75e-10	5.94e-09	2806.81	2814.79	3484	3325.82	Distal Intergenic	8	62951232	63357098	405867	1	72902	uc009lur.2	-146069	ENSMUSG00000054162	Spock3	sparc/osteonectin, cwcv and kazal-like domains proteoglycan 3	NA	NA	NA
chr9	95554287	95570903	16617	*	8.39	8.74	7.93	0.81	1.81e-10	6.11e-09	430.35	423.77	235	253.71	Promoter (<=1kb)	9	95559817	95562121	2305	1	75552	uc009rbf.1	0	ENSMUSG00000064225	Paqr9	progestin and adipoQ receptor family member IX	uc009rbf.1	75552	0
chr19	54043759	54049135	5377	*	6.83	7.37	5.97	1.4	1.97e-10	6.64e-09	166.35	164.39	65	60.53	Promoter (<=1kb)	19	54045182	54048982	3801	1	11551	uc012bnl.1	0	ENSMUSG00000033717	Adra2a	adrenergic receptor, alpha 2a	uc012bnl.1	11551	0
chr2	22608953	22644250	35298	*	9.29	9.55	8.96	0.59	2e-10	6.73e-09	777.12	726.38	506	492.29	Promoter (<=1kb)	2	22622327	22625073	2747	1	14417	uc008ini.1	0	ENSMUSG00000026787	Gad2	glutamic acid decarboxylase 2	uc008ini.1;uc008inj.1;uc008ink.1;uc029tvw.2	14417;14417;14417;667663	0;0;0;0
chr2	28903758	28921800	18043	*	8.37	8.72	7.89	0.84	2.09e-10	7e-09	405.11	440.82	223	251.04	Promoter (<=1kb)	2	28907680	28916421	8742	2	54422	uc008izh.2	0	ENSMUSG00000026805	Barhl1	BarH like homeobox 1	uc008izg.2;uc008izh.2;uc012btd.1	227674;54422;54422	0;0;0
chr15	103166517	103185228	18712	*	8.16	8.53	7.66	0.87	2.2e-10	7.36e-09	364.56	375.06	214	189.61	Promoter (<=1kb)	15	103153290	103167982	14693	2	71726	uc007xxi.1	0	ENSMUSG00000036061	Smug1	single-strand selective monofunctional uracil DNA glycosylase	uc007xxh.1;uc007xxi.1;uc007xxj.1;uc007xxk.1	71726;71726;71726;71726	-3080;0;-3080;-3080
chr8	53295339	53450972	155634	*	11.64	11.5	11.77	-0.27	2.25e-10	7.49e-09	2946.26	2848.88	3493	3488.73	Distal Intergenic	8	53511702	53523422	11721	1	11593	uc009lrz.2	-60730	ENSMUSG00000031521	Aga	aspartylglucosaminidase	NA	NA	NA
chr11	85880421	85897483	17063	*	8.47	8.82	8.02	0.79	2.27e-10	7.54e-09	475.87	425.6	258	261.72	Promoter (<=1kb)	11	85890063	85916097	26035	1	21387	uc007ksc.2	0	ENSMUSG00000000094	Tbx4	T-box 4	uc007ksc.2;uc007ksd.2	21387;21387	0;0
chr7	132592894	132611413	18520	*	8.43	8.78	7.98	0.79	2.29e-10	7.6e-09	456.84	420.12	252	253.71	Promoter (<=1kb)	7	132596239	132599637	3399	2	20231	uc009kcc.1	0	ENSMUSG00000048528	Nkx1-2	NK1 homeobox 2	uc009kcc.1;uc009kce.1	20231;76429	0;0
chr11	112845684	112884564	38881	*	9.19	9.46	8.86	0.6	2.3e-10	7.62e-09	703.05	706.28	478	451.34	Distal Intergenic	11	112822965	112825128	2164	2	76393	uc007mef.2	-20556	NA	1700012H19Rik	RIKEN cDNA 1700012H19 gene	NA	NA	NA
chr7	81449395	81457951	8557	*	7.41	7.86	6.74	1.12	2.77e-10	9.14e-09	223.87	240.5	107	106.83	Promoter (<=1kb)	7	81347026	81454758	107733	2	12877	uc009ibw.2	0	ENSMUSG00000025586	Cpeb1	cytoplasmic polyadenylation element binding protein 1	uc009ibx.1;uc009iby.1;uc009ibw.2;uc012fnu.2;uc012fnv.2	11775;11775;12877;12877;12877	7344;35974;0;0;0
chr19	58444691	58459394	14704	*	8.04	8.42	7.51	0.9	2.82e-10	9.27e-09	331.45	352.53	191	174.48	Promoter (<=1kb)	19	58235581	58454594	219014	2	14585	uc008ial.2	0	ENSMUSG00000025089	Gfra1	glial cell line derived neurotrophic factor family receptor alpha 1	uc008ial.2;uc008iam.2;uc008ian.2	14585;14585;14585	0;0;0
chr14	54539104	54555359	16256	*	7.97	8.36	7.43	0.92	2.9e-10	9.52e-09	339.32	317.22	183	162.91	Promoter (<=1kb)	14	54541785	54554361	12577	2	219072	uc007twh.2	0	ENSMUSG00000022177	Haus4	HAUS augmin-like complex, subunit 4	uc007twh.2	219072	0
chr8	116691897	116896271	204375	*	11.97	12.09	11.84	0.26	3.03e-10	9.93e-09	4326.29	4417.32	3538	3778.05	Promoter (<=1kb)	8	116568724	116732991	164268	2	75796	uc009noi.2	0	ENSMUSG00000031758	Cdyl2	chromodomain protein, Y chromosome-like 2	uc009nom.1;uc009non.1;uc012glg.1;uc009noi.2;uc009nol.1	66531;66531;66531;75796;78213	0;0;0;0;0
chr16	3231579	3284739	53161	*	11.42	11.28	11.56	-0.28	3.12e-10	1.02e-08	2481.15	2479.3	3016	3004.46	Distal Intergenic	16	3592398	3593339	942	1	258859	uc007xyl.1	-307659	ENSMUSG00000051003	Olfr161	olfactory receptor 161	NA	NA	NA
chr1	91798227	91806241	8015	*	7.37	7.82	6.7	1.12	3.62e-10	1.17e-08	230.9	221.63	109	98.81	Promoter (<=1kb)	1	91801461	91848034	46574	1	13345	uc007cbd.2	0	ENSMUSG00000007805	Twist2	twist basic helix-loop-helix transcription factor 2	uc007cbd.2	13345	0
chr8	37852048	37996473	144426	*	11.52	11.37	11.66	-0.28	3.62e-10	1.17e-08	2658.26	2648.57	3321	3137.99	Exon (uc012gck.1/244431, exon 2 of 8)	8	37522554	38248828	726275	2	244431	uc012gck.1	252355	ENSMUSG00000039539	Sgcz	sarcoglycan zeta	uc012gck.1;uc009lme.2	244431;244431	0;0
chr13	31550454	31567371	16918	*	8.09	8.47	7.58	0.88	3.62e-10	1.17e-08	348.83	358.62	204	179.82	Promoter (<=1kb)	13	31558170	31560976	2807	1	15220	uc007pzj.3	0	ENSMUSG00000038415	Foxq1	forkhead box Q1	uc007pzj.3;uc007pzl.1;uc007pzm.1	15220;71307;71307	0;0;15142
chr8	38434962	38710998	276037	*	12.49	12.38	12.6	-0.23	3.67e-10	1.19e-08	5337.62	5286.18	6419	6004.46	Promoter (<=1kb)	8	37522554	38661508	1138955	2	244431	uc009lme.2	0	ENSMUSG00000039539	Sgcz	sarcoglycan zeta	uc009lme.2	244431	0
chr4	152268662	152293860	25199	*	8.54	8.88	8.09	0.78	3.72e-10	1.2e-08	494.08	446.3	255	291.1	Promoter (<=1kb)	4	152274362	152285337	10976	1	100129	uc008wab.1	0	ENSMUSG00000042804	Gpr153	G protein-coupled receptor 153	uc008wab.1;uc008wac.1;uc008wad.2;uc029vba.1;uc008vzx.2;uc008vzy.2;uc008vzz.2;uc008waa.2	100129;15207;57295;57295;70025;70025;70025;70025	0;0;-3354;-3354;0;0;0;0
chr11	69365590	69371165	5576	*	6.4	7	5.37	1.62	3.94e-10	1.27e-08	128.28	127.25	42	40.95	Promoter (<=1kb)	11	69343273	69369426	26154	2	216848	uc029rmi.2	0	ENSMUSG00000018474	Chd3	chromodomain helicase DNA binding protein 3	uc029rmi.2	216848	0
chr8	38213639	38407872	194234	*	11.92	11.8	12.04	-0.24	3.96e-10	1.27e-08	3569.86	3566.13	4262	4153.72	Promoter (<=1kb)	8	37522554	38248828	726275	2	244431	uc012gck.1	0	ENSMUSG00000039539	Sgcz	sarcoglycan zeta	uc012gck.1;uc009lme.2;uc012gcl.1	244431;244431;723860	0;0;0
chr11	112949608	112979477	29870	*	8.87	9.16	8.51	0.66	4e-10	1.28e-08	581.39	565.64	362	364.99	Distal Intergenic	11	112822965	112825128	2164	2	76393	uc007mef.2	-124480	NA	1700012H19Rik	RIKEN cDNA 1700012H19 gene	NA	NA	NA
chr8	106263822	106479386	215565	*	12	12.12	11.87	0.25	4.01e-10	1.28e-08	4459.53	4452.64	3608	3870.63	Promoter (<=1kb)	8	106415339	106425728	10390	1	22751	uc009ngc.1	0	ENSMUSG00000031907	Zfp90	zinc finger protein 90	uc009ngc.1;uc009ngd.1;uc033jhl.1;uc033jhm.1;uc009nge.1;uc009nfx.1;uc009nfy.1;uc009nfz.1;uc009nga.2;uc057amv.1	22751;22751;22751;22751;22751;58994;58994;58994;75044;75044	0;0;0;0;0;0;0;0;0;0
chr11	107789311	107797385	8075	*	7.02	7.52	6.24	1.28	4.36e-10	1.39e-08	179.59	188.14	72	79.23	Promoter (<=1kb)	11	107734780	107794464	59685	2	54377	uc007maz.1	0	ENSMUSG00000020723	Cacng4	calcium channel, voltage-dependent, gamma subunit 4	uc007maz.1	54377	0
chr3	131100352	131128175	27824	*	9.03	9.31	8.66	0.65	4.38e-10	1.39e-08	669.53	604	421	389.91	Promoter (<=1kb)	3	131110297	131224357	114061	1	16842	uc008rjf.2	0	ENSMUSG00000027985	Lef1	lymphoid enhancer binding factor 1	uc008rjf.2;uc008rjg.2;uc008rji.2;uc008rjj.2;uc008rjk.2	16842;16842;16842;16842;16842	0;0;0;0;0
chr12	108316787	108336917	20131	*	8.37	8.72	7.92	0.79	4.44e-10	1.41e-08	417.11	424.99	255	230.56	Promoter (<=1kb)	12	108334381	108362234	27854	1	13116	uc007ozo.1	0	ENSMUSG00000021259	Cyp46a1	cytochrome P450, family 46, subfamily a, polypeptide 1	uc007ozo.1;uc007ozn.1	13116;214305	0;0
chr8	121687968	121741345	53378	*	9.92	10.13	9.67	0.46	4.8e-10	1.52e-08	1120.57	1125.79	799	832.35	Promoter (<=1kb)	8	121730559	121791083	60525	1	57340	uc009nrz.2	0	ENSMUSG00000025318	Jph3	junctophilin 3	uc009nrz.2	57340	0
chr11	114056459	114076710	20252	*	8.17	8.53	7.67	0.86	4.83e-10	1.52e-08	375.32	365.93	190	218.1	Promoter (<=1kb)	11	113780790	114065951	285162	2	237979	uc007mfe.1	0	ENSMUSG00000041592	Sdk2	sidekick cell adhesion molecule 2	uc007mfe.1;uc007mff.1;uc007mfg.1;uc011yhe.1	237979;237979;237979;237979	0;0;0;0
chr15	85570451	85589708	19258	*	8.26	8.63	7.77	0.86	4.84e-10	1.52e-08	384.42	407.94	199	238.58	Promoter (<=1kb)	15	85581142	85593708	12567	1	105975	uc007xdh.1	0	ENSMUSG00000097209	AU022754	expressed sequence AU022754	uc007xdh.1;uc007xde.2;uc011zxl.1;uc007xdf.2;uc007xdg.2	105975;22422;22422;22422;22422	0;0;0;0;0
chr9	40846715	40890717	44003	*	9.59	9.83	9.31	0.52	4.87e-10	1.53e-08	931.88	890.77	656	613.35	Promoter (<=1kb)	9	40874127	40877972	3846	1	244813	uc009paa.1	0	ENSMUSG00000054360	Bsx	brain specific homeobox	uc009paa.1;uc009pab.1;uc009pac.1	244813;70989;70989	0;6901;0
chr2	90879713	90891228	11516	*	7.88	8.27	7.34	0.93	5.31e-10	1.66e-08	307.87	309.3	171	153.12	Promoter (<=1kb)	2	90885786	90890526	4741	1	67445	uc008ktq.1	0	ENSMUSG00000040794	C1qtnf4	C1q and tumor necrosis factor related protein 4	uc008ktq.1;uc008ktr.1	67445;68349	0;13493
chr11	119540016	119555399	15384	*	7.9	8.29	7.36	0.93	5.38e-10	1.68e-08	299.59	325.74	167	161.13	Promoter (<=1kb)	11	119548630	119569046	20417	1	100503830	uc029rqb.1	0	ENSMUSG00000087675	Gm11762	predicted gene 11762	uc029rqb.1;uc007mqv.1	100503830;18164	0;0
chr12	16792118	16812292	20175	*	8.44	8.77	8	0.78	5.6e-10	1.75e-08	421.66	454.21	261	250.15	Promoter (<=1kb)	12	16670615	16800886	130272	2	268527	uc029rrb.1	0	ENSMUSG00000036523	Greb1	gene regulated by estrogen in breast cancer protein	uc029rrb.1;uc007ncc.2;uc033gcv.1;uc007nce.2;uc007ncf.2	268527;50496;50496;50496;50496	0;0;0;0;0
chr11	59130556	59140767	10212	*	7.11	7.59	6.37	1.22	5.63e-10	1.75e-08	192.42	193.62	83	82.79	Promoter (<=1kb)	11	58994256	59136375	142120	2	380698	uc029rlw.1	0	ENSMUSG00000061462	Obscn	obscurin, cytoskeletal calmodulin and titin-interacting RhoGEF	uc029rlw.1;uc029rlx.1	380698;380698	0;0
chr5	119829811	119849539	19729	*	8.44	8.78	8	0.78	7.1e-10	2.2e-08	460.97	417.07	245	265.28	Promoter (<=1kb)	5	119834663	119885218	50556	1	21388	uc008zgz.2	0	ENSMUSG00000018263	Tbx5	T-box 5	uc008zgz.2	21388	0
chr2	70553323	70570321	16999	*	8.26	8.61	7.8	0.81	7.3e-10	2.26e-08	393.94	386.63	225	221.66	Promoter (<=1kb)	2	70562129	70577130	15002	1	14415	uc008jzj.2	0	ENSMUSG00000070880	Gad1	glutamate decarboxylase 1	uc008jzj.2;uc056znb.2;uc008jzk.2;uc056znc.1;uc008jzl.1;uc008jzm.2;uc029txz.1	14415;14415;14415;14415;14415;14415;68986	0;0;0;0;0;0;0
chr8	122262458	122306909	44452	*	9.44	9.69	9.13	0.56	7.32e-10	2.26e-08	825.53	828.06	524	596.44	Promoter (<=1kb)	8	122282141	122337247	55107	1	22761	uc009nsj.1	0	ENSMUSG00000049577	Zfpm1	zinc finger protein, multitype 1	uc009nsj.1	22761	0
chr5	32131700	32140669	8970	*	7.21	7.68	6.49	1.19	7.32e-10	2.26e-08	194.07	216.76	94	86.35	Promoter (<=1kb)	5	32136472	32157840	21369	1	14284	uc008wzi.3	0	ENSMUSG00000029135	Fosl2	fos-like antigen 2	uc008wzi.3	14284	0
chr4	115955470	115982077	26608	*	8.87	9.17	8.49	0.69	7.36e-10	2.26e-08	584.29	568.07	390	326.71	3' UTR	4	115967145	116017902	50758	2	14073	uc012djg.1	35825	ENSMUSG00000034171	Faah	fatty acid amide hydrolase	uc012djg.1	14073	0
chr14	76227368	76284366	56999	*	9.86	10.09	9.58	0.51	7.6e-10	2.33e-08	1149.54	1027.77	733	794.96	Promoter (<=1kb)	14	76251462	76252325	864	1	72893	uc007urg.1	0	NA	2900040C04Rik	RIKEN cDNA 2900040C04 gene	uc007urg.1	72893	0
chr14	48652985	48696711	43727	*	9.68	9.91	9.41	0.49	7.62e-10	2.33e-08	970.78	952.27	701	664.1	Promoter (<=1kb)	14	48657677	48662872	5196	2	18424	uc007tjq.3	0	ENSMUSG00000021848	Otx2	orthodenticle homeobox 2	uc007tjq.3;uc007tjr.3;uc007tjs.3;uc033gpq.1;uc007tjt.1	18424;18424;18424;18424;606497	0;0;0;0;0
chr12	80743445	80761848	18404	*	8.42	8.76	7.99	0.77	7.9e-10	2.41e-08	425.39	440.21	265	243.03	Promoter (<=1kb)	12	80755447	80760715	5269	2	380768	uc007obh.2	0	ENSMUSG00000062961	Ccdc177	coiled-coil domain containing 177	uc007obh.2	380768	0
chr15	91047619	91079859	32241	*	9.14	9.4	8.81	0.6	8.15e-10	2.48e-08	700.56	654.53	448	446.88	Promoter (<=1kb)	15	90933275	91049951	116677	2	16564	uc007xhs.3	0	ENSMUSG00000022629	Kif21a	kinesin family member 21A	uc007xhs.3;uc007xht.3;uc007xhu.3;uc007xhv.3	16564;16564;16564;16564	0;0;0;0
chr18	78346621	78385737	39117	*	9.36	9.61	9.05	0.56	8.17e-10	2.48e-08	799.05	764.74	511	550.15	Intron (uc008fsg.2/27411, intron 2 of 21)	18	78146144	78596950	450807	2	27411	uc008fsg.2	211213	ENSMUSG00000024552	Slc14a2	solute carrier family 14 (urea transporter), member 2	uc008fsg.2;uc008fsh.2	27411;27411	0;0
chr2	174315973	174332539	16567	*	7.98	8.36	7.46	0.9	8.22e-10	2.49e-08	333.94	323.92	190	162.91	Promoter (<=1kb)	2	174327768	174328846	1079	1	14683	uc008oex.2	0	ENSMUSG00000027523	Gnas	GNAS (guanine nucleotide binding protein, alpha stimulating) complex locus	uc008oer.2;uc008oes.2;uc008oeu.3;uc008oew.3;uc033hrq.2;uc008oex.2;uc008oey.3;uc033hrr.3;uc033hrs.2;uc057lez.1	14683;14683;14683;14683;14683;14683;14683;14683;14683;14683	0;0;0;0;0;0;0;0;0;0
chr11	96989634	97021686	32053	*	8.85	9.15	8.48	0.67	8.24e-10	2.49e-08	555.32	580.25	338	375.67	Promoter (<=1kb)	11	97013569	97024738	11170	1	83395	uc007ldh.2	0	ENSMUSG00000038560	Sp6	trans-acting transcription factor 6	uc007ldj.1;uc007ldh.2;uc007ldi.2	100127433;83395;83395	0;0;0
chr15	57691799	57696804	5006	*	6.55	7.11	5.6	1.52	8.32e-10	2.51e-08	139.45	137.6	54	42.73	Promoter (<=1kb)	15	57694667	57839832	145166	1	387609	uc007vsp.1	0	ENSMUSG00000071757	Zhx2	zinc fingers and homeoboxes 2	uc007vsp.1	387609	0
chr4	100768761	100784750	15990	*	7.88	8.26	7.35	0.91	8.94e-10	2.69e-08	301.66	311.74	164	162.02	Promoter (<=1kb)	4	100776679	100984296	207618	1	320508	uc008tvg.1	0	ENSMUSG00000028532	Cachd1	cache domain containing 1	uc008tvg.1;uc008tvh.2	320508;320508	0;0
chr12	117224021	117246731	22711	*	8.45	8.77	8.02	0.75	9.5e-10	2.85e-08	444.84	431.08	265	255.49	Exon (uc007phx.2/19276, exon 16 of 23)	12	116485720	117278167	792448	1	19276	uc007phx.2	738301	ENSMUSG00000056553	Ptprn2	protein tyrosine phosphatase, receptor type, N polypeptide 2	uc007phx.2;uc011yvq.1;uc011yvr.1;uc029ryo.1	19276;19276;387171;432713	0;0;-4086;0
chr19	45014495	45029514	15020	*	7.53	7.96	6.91	1.05	9.92e-10	2.97e-08	243.73	253.9	111	129.97	Promoter (<=1kb)	19	45015176	45027104	11929	1	226154	uc008hqn.2	0	ENSMUSG00000035342	Lzts2	leucine zipper, putative tumor suppressor 2	uc012bmj.1;uc012bmk.1;uc056zim.1;uc008hqh.1;uc008hqi.1;uc008hqj.1;uc008hqn.2;uc008hql.2;uc008hqm.2	100503041;100503041;100503041;226153;226153;226153;226154;226154;226154	0;0;0;8803;7937;5355;0;0;0
chr14	61657821	61694785	36965	*	9.32	9.57	9.01	0.56	1.01e-09	3.01e-08	754.36	764.74	499	532.35	Promoter (<=1kb)	14	61602836	61682373	79538	2	668253	uc007ugb.2	0	ENSMUSG00000097589	Dleu2	deleted in lymphocytic leukemia, 2	uc007ugb.2;uc007ugc.2;uc007ugi.2	668253;668253;668253	0;0;0
chr19	59155449	59176266	20818	*	8.59	8.91	8.18	0.72	1.05e-09	3.12e-08	461.8	498.05	287	293.77	Promoter (<=1kb)	19	59164485	59170029	5545	2	22326	uc008ibg.2	0	ENSMUSG00000006270	Vax1	ventral anterior homeobox 1	uc008ibg.2	22326	0
chr4	48032244	48065622	33379	*	9.13	9.42	8.76	0.65	1.07e-09	3.18e-08	705.12	661.84	392	478.04	Promoter (<=1kb)	4	48045305	48050161	4857	1	18124	uc029uuf.2	0	ENSMUSG00000028341	Nr4a3	nuclear receptor subfamily 4, group A, member 3	uc029uuf.2;uc008suu.2;uc008suv.1	18124;18124;18124	0;0;0
chr8	74753506	75056346	302841	*	12.5	12.6	12.38	0.22	1.08e-09	3.21e-08	6255.43	6172.08	5147	5516.63	Promoter (<=1kb)	8	75033686	75070121	36436	1	21968	uc009mha.2	0	ENSMUSG00000042870	Tom1	target of myb1 trafficking protein	uc009mha.2;uc012ggc.1;uc009mhb.2;uc009mgw.2;uc009mgx.2;uc009mgy.2;uc009mgz.2;uc009mgv.1;uc012ggb.1	21968;21968;21968;70823;70823;70823;70823;71597;71597	0;0;-3968;0;0;0;0;0;0
chr9	118455448	118494102	38655	*	9.4	9.64	9.1	0.54	1.09e-09	3.22e-08	794.5	801.88	537	561.72	Promoter (<=1kb)	9	118478189	118482757	4569	1	13813	uc009rzo.2	0	ENSMUSG00000032446	Eomes	eomesodermin	uc009rzo.2;uc009rzp.2;uc009rzq.2	13813;13813;13813	0;0;0
chr3	107574522	107598990	24469	*	8.91	9.19	8.55	0.64	1.09e-09	3.23e-08	595.87	571.73	369	381.9	Promoter (<=1kb)	3	107595031	107605875	10845	1	11694	uc008qxf.2	0	ENSMUSG00000014603	Alx3	aristaless-like homeobox 3	uc008qxf.2	11694	0
chr18	80974338	80997615	23278	*	8.71	9.02	8.33	0.68	1.12e-09	3.32e-08	506.08	529.1	330	314.24	Promoter (<=1kb)	18	80966359	80974625	8267	2	20689	uc008ftl.3	0	ENSMUSG00000024565	Sall3	spalt like transcription factor 3	uc008ftl.3;uc008ftm.2;uc008ftn.2	20689;20689;20689	0;0;0
chr7	34809129	34816953	7825	*	7.37	7.82	6.72	1.1	1.13e-09	3.32e-08	225.52	226.5	97	113.95	Promoter (<=1kb)	7	34674468	34812711	138244	2	68947	uc009gjh.2	0	ENSMUSG00000060402	Chst8	carbohydrate sulfotransferase 8	uc009gjh.2	68947	0
chr13	119609497	119621715	12219	*	9.01	9.31	8.62	0.68	1.13e-09	3.32e-08	687.74	579.03	413	376.56	3' UTR	13	119488039	119610459	122421	1	633640	uc029sdk.1	121458	ENSMUSG00000074634	Tmem267	transmembrane protein 267	uc007sal.2;uc029sdk.1;uc029sdm.1	56838;633640;633640	-2104;0;0
chr5	41747106	41777659	30554	*	9.04	9.33	8.67	0.65	1.13e-09	3.32e-08	644.29	638.7	448	368.55	Promoter (<=1kb)	5	41761448	41764220	2773	2	12020	uc008xhc.1	0	ENSMUSG00000049691	Nkx3-2	NK3 homeobox 2	uc008xhc.1	12020	0
chr7	142963305	142983540	20236	*	8.61	8.92	8.21	0.71	1.15e-09	3.36e-08	480.84	488.31	308	284.87	Promoter (<=1kb)	7	142966822	142969264	2443	2	17173	uc009koj.2	0	ENSMUSG00000009248	Ascl2	achaete-scute family bHLH transcription factor 2	uc009koj.2	17173	0
chr8	11310016	11315275	5260	*	6.66	7.2	5.77	1.44	1.2e-09	3.5e-08	155.59	139.43	53	56.08	Promoter (<=1kb)	8	11198423	11312826	114404	2	12826	uc009kvb.2	0	ENSMUSG00000031502	Col4a1	collagen, type IV, alpha 1	uc009kvb.2;uc012fzi.1;uc009kvc.3	12826;12826;12827	0;0;0
chr19	25655383	25681319	25937	*	8.86	9.15	8.5	0.65	1.21e-09	3.51e-08	577.25	557.72	353	372.11	Promoter (<=1kb)	19	25671134	25672239	1106	2	100503074	uc008hbl.2	0	ENSMUSG00000101089	2610016A17Rik	RIKEN cDNA 2610016A17 gene	uc008hbl.2;uc008hbm.1	100503074;226049	0;0
chr15	65744918	65817811	72894	*	10.21	10.4	9.99	0.41	1.25e-09	3.62e-08	1342.37	1356.55	1009	1026.41	Promoter (<=1kb)	15	65787041	65791351	4311	1	76740	uc007vzq.1	0	ENSMUSG00000015002	Efr3a	EFR3 homolog A	uc007vzq.1;uc007vzr.1;uc011ztl.1;uc007vzs.1;uc007vzt.1;uc007vzu.1;uc007vzv.1	76740;76740;76740;76740;76740;76740;76740	0;0;0;0;0;0;0
chr8	112823857	113280323	456467	*	13.13	13.04	13.21	-0.17	1.35e-09	3.92e-08	8382.77	8433.4	9398	9543.93	Promoter (<=1kb)	8	113067262	113093334	26073	1	791378	uc009nnm.2	0	ENSMUSG00000110541	Gm10280	predicted gene 10280	uc009nnj.1;uc009nnk.1;uc012glb.1;uc009nnm.2	170571;170571;170571;791378	0;0;0;0
chr9	37448467	37464873	16407	*	8.41	8.74	7.97	0.77	1.36e-09	3.92e-08	443.18	412.81	242	260.83	Distal Intergenic	9	37416045	37433175	17131	2	19649	uc012gqz.1	-15292	ENSMUSG00000032128	Robo3	roundabout guidance receptor 3	NA	NA	NA
chr3	94396903	94428344	31442	*	9.08	9.34	8.75	0.6	1.44e-09	4.16e-08	648.43	652.1	414	444.21	Promoter (<=1kb)	3	94399219	94404501	5283	1	320747	uc008qgb.1	0	ENSMUSG00000044505	Lingo4	leucine rich repeat and Ig domain containing 4	uc008qfy.4;uc008qfz.4;uc012ctm.3;uc012ctn.3;uc008qgb.1;uc008qgd.1;uc008qge.1;uc008qgf.1;uc008qgc.1	19885;19885;19885;19885;320747;72634;72634;72634;76602	0;0;0;0;0;0;0;0;0
chr1	166401469	166418427	16959	*	8.19	8.54	7.73	0.81	1.46e-09	4.2e-08	368.28	378.11	212	213.65	Promoter (<=1kb)	1	166393610	166409828	16219	2	71592	uc007dkp.4	0	ENSMUSG00000040596	Pogk	pogo transposable element with KRAB domain	uc007dkp.4;uc011wvk.3;uc007dko.2	71592;71592;71592	0;0;0
chr5	140603352	140618022	14671	*	7.84	8.23	7.3	0.93	1.47e-09	4.21e-08	305.38	295.3	147	169.14	Promoter (<=1kb)	5	140607341	140615545	8205	1	16848	uc009ahu.1	0	ENSMUSG00000029570	Lfng	LFNG O-fucosylpeptide 3-beta-N-acetylglucosaminyltransferase	uc009ahu.1;uc009ahv.1;uc009ahw.3;uc012egc.2	16848;16848;78339;78339	0;0;31009;31009
chr17	14271385	14305900	34516	*	9.09	9.36	8.76	0.59	1.49e-09	4.27e-08	644.7	665.49	431	437.98	Promoter (<=1kb)	17	14279506	14326128	46623	1	64074	uc008amw.5	0	ENSMUSG00000023886	Smoc2	SPARC related modular calcium binding 2	uc008amw.5;uc008amx.2;uc008amy.2	64074;64074;64074	0;0;0
chr7	70277889	70290087	12199	*	8.07	8.44	7.56	0.88	1.59e-09	4.55e-08	358.35	336.09	208	169.14	Exon (uc009hnh.2/624549, exon 2 of 4)	7	70178868	70337852	158985	2	624549	uc057ahu.1	47765	ENSMUSG00000109097	Gm29683	predicted gene, 29683	uc057ahu.1;uc009hnh.2	624549;624549	0;0
chr15	76514856	76525870	11015	*	7.7	8.12	7.11	1.01	1.67e-09	4.76e-08	285.11	272.16	119	157.57	Promoter (<=1kb)	15	76516203	76522129	5927	2	170729	uc007wko.1	0	ENSMUSG00000048385	Scrt1	scratch family zinc finger 1	uc007wkn.1;uc007wko.1	13350;170729	-3038;0
chr18	9209046	9224585	15540	*	8.03	8.4	7.54	0.85	1.68e-09	4.79e-08	336.42	337.31	183	190.5	Promoter (<=1kb)	18	9212856	9216201	3346	1	14370	uc008eag.2	0	ENSMUSG00000036904	Fzd8	frizzled class receptor 8	uc008eag.2	14370	0
chr2	45072971	45119073	46103	*	9.39	9.63	9.1	0.53	1.73e-09	4.93e-08	789.12	793.35	556	539.47	Promoter (<=1kb)	2	44983512	45110277	126766	2	24136	uc008jpc.2	0	ENSMUSG00000026872	Zeb2	zinc finger E-box binding homeobox 2	uc008jpc.2;uc008jpd.2;uc008jpe.2;uc008jpf.1;uc008jpg.1;uc008jph.1;uc008jpi.1;uc008jpj.1;uc012bvd.4;uc008jpk.3	24136;24136;24136;24136;24136;24136;24136;24136;433424;433424	0;0;0;0;0;0;0;0;0;0
chr7	98757010	98776394	19385	*	8.06	8.42	7.58	0.84	1.74e-09	4.94e-08	337.66	348.27	188	194.07	Distal Intergenic	7	98703363	98718062	14700	1	72981	uc009ikt.2	53647	ENSMUSG00000030753	Thap12	THAP domain containing 12	NA	NA	NA
chr9	30920903	30946257	25355	*	8.57	8.88	8.18	0.7	1.79e-09	5.07e-08	468.42	476.74	287	292.88	Promoter (<=1kb)	9	30899155	30922452	23298	2	235130	uc009oqz.1	0	ENSMUSG00000033453	Adamts15	a disintegrin-like and metallopeptidase (reprolysin type) with thrombospondin type 1 motif, 15	uc009oqz.1;uc009ora.2;uc012gpt.2	235130;30806;30806	0;0;0
chr10	60819895	60835557	15663	*	7.78	8.19	7.2	0.99	1.87e-09	5.28e-08	294.21	291.04	125	169.14	Promoter (<=1kb)	10	60762595	60820641	58047	2	107449	uc007ffd.1	0	ENSMUSG00000020099	Unc5b	unc-5 netrin receptor B	uc007ffd.1;uc007ffe.1;uc007fff.1	107449;107449;107449	0;0;0
chr11	95138709	95152765	14057	*	8.28	8.62	7.83	0.79	1.93e-09	5.45e-08	396.42	388.46	219	235.91	Promoter (<=1kb)	11	95140447	95145801	5355	2	13394	uc007kzz.2	0	ENSMUSG00000020871	Dlx4	distal-less homeobox 4	uc007kzz.2;uc007laa.2;uc007lab.1	13394;13394;320453	0;0;0
chr2	70455939	70484717	28779	*	9.06	9.32	8.73	0.59	1.94e-09	5.47e-08	632.7	648.44	430	419.29	Promoter (<=1kb)	2	70474923	70477726	2804	1	64406	uc008jzg.1	0	ENSMUSG00000075304	Sp5	trans-acting transcription factor 5	uc008jzg.1	64406	0
chr15	79797997	79808952	10956	*	7.7	8.1	7.15	0.95	2.01e-09	5.64e-08	270.63	278.86	138	146.88	Promoter (<=1kb)	15	79786351	79804709	18359	2	73340	uc007wul.2	0	ENSMUSG00000022421	Nptxr	neuronal pentraxin receptor	uc007wum.1;uc007wun.1;uc007wul.2	504193;504193;73340	0;0;0
chr8	108763290	108800508	37219	*	9.45	9.7	9.15	0.54	2.08e-09	5.82e-08	840.02	821.36	533	606.23	5' UTR	8	108714644	108961636	246993	1	11906	uc009nid.1	48646	ENSMUSG00000038872	Zfhx3	zinc finger homeobox 3	uc009nid.1	11906	0
chr7	63749856	63764941	15086	*	8.01	8.38	7.51	0.88	2.11e-09	5.89e-08	340.14	327.57	167	196.74	3' UTR	7	63444772	63759027	314256	1	170711	uc009hfl.1	305084	ENSMUSG00000033510	Otud7a	OTU domain containing 7A	uc009hfl.1	170711	0
chr19	5557686	5569787	12102	*	7.69	8.09	7.14	0.95	2.13e-09	5.93e-08	270.21	275.21	148	134.42	Promoter (<=1kb)	19	5549137	5560575	11439	2	18426	uc008gdu.1	0	ENSMUSG00000024922	Ovol1	ovo like zinc finger 1	uc008gdu.1;uc008gdv.1;uc008gdw.1	18426;381201;381201	0;0;0
chr5	24599402	24608249	8848	*	7.02	7.51	6.28	1.23	2.22e-09	6.17e-08	174.62	190.58	84	71.22	Promoter (<=1kb)	5	24592622	24602002	9381	2	66993	uc008wsd.1	0	ENSMUSG00000028949	Smarcd3	SWI/SNF related, matrix associated, actin dependent regulator of chromatin, subfamily d, member 3	uc008wsd.1	66993	0
chr1	87248985	87270431	21447	*	8.43	8.76	8.01	0.75	2.23e-09	6.2e-08	418.77	446.91	259	257.27	Promoter (<=1kb)	1	87264364	87310791	46428	1	98363	uc007bwo.1	0	ENSMUSG00000026255	Efhd1	EF hand domain containing 1	uc007bwo.1	98363	0
chr13	71956781	71975771	18991	*	8.51	8.82	8.1	0.72	2.28e-09	6.31e-08	458.08	446.3	278	272.4	Promoter (<=1kb)	13	71958232	71963723	5492	2	16371	uc007rdd.1	0	ENSMUSG00000060969	Irx1	Iroquois homeobox 1	uc007rdd.1	16371	0
chr18	79988246	80009555	21310	*	8.47	8.8	8.04	0.76	2.36e-09	6.53e-08	462.22	427.42	245	281.31	Distal Intergenic	18	80046895	80119640	72746	1	93737	uc008fsj.2	-37340	ENSMUSG00000056214	Pard6g	par-6 family cell polarity regulator gamma	NA	NA	NA
chr2	93637646	93653482	15837	*	8.11	8.47	7.63	0.84	2.42e-09	6.67e-08	346.77	362.88	212	185.16	Promoter (<=1kb)	2	93642434	93680386	37953	1	11695	uc008lgd.2	0	ENSMUSG00000040310	Alx4	aristaless-like homeobox 4	uc008lgd.2;uc012bzt.1	11695;11695	0;0
chr10	58206019	58250237	44219	*	10.4	10.58	10.19	0.39	2.55e-09	7.02e-08	1538.92	1517.9	1127	1210.68	Promoter (<=1kb)	10	58234848	58236660	1813	2	245263	uc007fcw.1	0	ENSMUSG00000075045	Gm4981	predicted gene 4981	uc007fcw.1	245263	0
chr11	102941175	102967666	26492	*	8.71	9.01	8.33	0.68	2.63e-09	7.23e-08	520.15	508.4	303	339.17	Promoter (<=1kb)	11	102939264	102946461	7198	2	23829	uc007lsz.2	0	ENSMUSG00000045532	C1ql1	complement component 1, q subcomponent-like 1	uc007lsz.2;uc007lta.2	23829;69739	0;0
chr8	88685785	89040270	354486	*	12.64	12.73	12.53	0.2	2.66e-09	7.29e-08	6744.12	6888.71	5752	6081.02	Promoter (<=1kb)	8	89024735	89024831	97	1	102465899	uc033jgs.1	0	ENSMUSG00000099078	Mir8110	microRNA 8110	uc033jgs.1;uc009mrr.1;uc012gib.1;uc009msa.4;uc009mrt.3;uc009mru.3;uc009mrv.3;uc033jgr.2;uc033jgq.1;uc009mrx.3;uc009mry.1	102465899;257632;257632;58198;74256;74256;74256;74256;74256;74256;74256	0;0;0;0;0;0;0;0;0;0;0
chr9	54762563	54775012	12450	*	7.81	8.19	7.29	0.9	2.67e-09	7.3e-08	296.28	289.21	155	158.46	Promoter (<=1kb)	9	54764748	54773110	8363	1	12903	uc009prp.2	0	ENSMUSG00000032291	Crabp1	cellular retinoic acid binding protein I	uc009prp.2;uc033jkr.1	12903;12903	0;0
chr11	19794125	19818823	24699	*	8.63	8.95	8.23	0.72	2.67e-09	7.3e-08	501.53	485.27	274	325.82	Distal Intergenic	11	19924442	20019086	94645	1	114716	uc007icq.1	-105619	ENSMUSG00000045671	Spred2	sprouty-related, EVH1 domain containing 2	NA	NA	NA
chr2	26192803	26207900	15098	*	8.18	8.52	7.73	0.8	2.8e-09	7.63e-08	376.14	360.45	214	209.2	Promoter (<=1kb)	2	26200212	26202866	2655	2	16871	uc008iug.1	0	ENSMUSG00000026934	Lhx3	LIM homeobox protein 3	uc008iug.1;uc008iuh.2;uc008iui.2;uc008iuk.2;uc008iuj.2;uc008iul.2	16871;16871;16871;227638;227638;227638	0;0;0;17471;29499;29499
chr8	59053868	59131748	77881	*	10.65	10.47	10.81	-0.34	2.81e-09	7.63e-08	1413.54	1422.92	1812	1779.53	Distal Intergenic	8	58911755	58914298	2544	1	234290	uc009ltd.1	142113	ENSMUSG00000049946	BC030500	cDNA sequence BC030500	NA	NA	NA
chr12	86401992	86432475	30484	*	8.92	9.2	8.58	0.62	2.98e-09	8.1e-08	591.74	585.12	402	362.32	Promoter (<=1kb)	12	86421644	86515522	93879	1	26380	uc007ohu.1	0	ENSMUSG00000021255	Esrrb	estrogen related receptor, beta	uc007oht.2;uc007ohu.1;uc007ohv.2	26380;26380;26380	0;0;0
chr7	133037046	133044859	7814	*	7.15	7.63	6.43	1.2	3.15e-09	8.52e-08	201.11	195.45	73	99.7	Intron (uc009kcy.1/13017, intron 2 of 10)	7	132987011	133123483	136473	2	13017	uc009kcy.1	78624	ENSMUSG00000030970	Ctbp2	C-terminal binding protein 2	uc009kcy.1;uc009kcz.1	13017;13017	0;0
chr1	167677487	167716180	38694	*	9.29	9.53	9	0.54	3.22e-09	8.71e-08	746.91	736.73	508	513.65	Promoter (<=1kb)	1	167689558	167848733	159176	1	110648	uc007dlc.1	0	ENSMUSG00000026686	Lmx1a	LIM homeobox transcription factor 1 alpha	uc007dlc.1	110648	0
chr15	74513077	74519357	6281	*	6.69	7.22	5.84	1.38	3.31e-09	8.91e-08	153.93	143.69	53	61.42	Promoter (<=1kb)	15	74516196	74540560	24365	1	107831	uc011zua.1	0	ENSMUSG00000034730	Adgrb1	adhesion G protein-coupled receptor B1	uc011zua.1;uc007wco.1	107831;107831	0;0
chrY	258354	269943	11590	*	8.6	8.92	8.21	0.71	3.36e-09	9.05e-08	511.46	454.82	292	299.11	Distal Intergenic	21	206150	207789	1640	1	69438	uc057atw.1	52204	ENSMUSG00000101796	1700020D14Rik	RIKEN cDNA 1700020D14 gene	NA	NA	NA
chr9	67044548	67053010	8463	*	7.35	7.79	6.73	1.05	3.39e-09	9.09e-08	222.62	219.19	105	107.72	Promoter (<=1kb)	9	67022593	67049213	26621	2	22003	uc009qfp.1	0	ENSMUSG00000032366	Tpm1	tropomyosin 1, alpha	uc012gvr.1;uc012gvs.1;uc009qfp.1;uc012gvt.1;uc012gvu.1;uc012gvv.1;uc012gvw.1;uc012gvx.1;uc009qfq.2;uc009qfr.2;uc057lzu.1;uc009qfs.1	22003;22003;22003;22003;22003;22003;22003;22003;22003;22003;22003;22003	-677;-677;0;0;0;-677;0;-677;0;0;0;0
chr1	171059697	171076454	16758	*	7.88	8.26	7.36	0.9	3.39e-09	9.09e-08	314.07	297.74	152	176.26	Promoter (<=1kb)	1	171064591	171064652	62	2	102466998	uc033fnc.1	0	ENSMUSG00000099119	Mir6546	microRNA 6546	uc033fnc.1;uc007dmy.2;uc007dmz.2;uc011wvw.1	102466998;14131;14131;14131	0;-1645;-294;-294
chr7	26687734	26716084	28351	*	9.1	9.36	8.79	0.58	3.59e-09	9.6e-08	675.74	642.96	435	448.67	Promoter (1-2kb)	7	26665227	26686430	21204	2	243881	uc009fur.1	-1304	ENSMUSG00000040650	Cyp2b23	cytochrome P450, family 2, subfamily b, polypeptide 23	uc009fur.1	243881	-1304
chr3	52098344	52107595	9252	*	7.28	7.73	6.64	1.09	3.65e-09	9.75e-08	218.9	204.58	98	101.48	Promoter (<=1kb)	3	51687611	52105006	417396	2	433586	uc008pef.3	0	ENSMUSG00000061143	Maml3	mastermind like transcriptional coactivator 3	uc008pef.3	433586	0
chr13	94055245	94067190	11946	*	7.52	7.94	6.93	1.02	3.72e-09	9.91e-08	239.18	253.29	134	109.5	Promoter (<=1kb)	13	94057796	94195409	137614	1	218454	uc007rlp.1	0	ENSMUSG00000045312	Lhfpl2	lipoma HMGIC fusion partner-like 2	uc007rlp.1	218454	0
chr1	74947535	74959520	11986	*	7.92	8.29	7.43	0.86	4.18e-09	1.11e-07	314.07	311.74	171	174.48	Promoter (<=1kb)	1	74945315	74951672	6358	2	16147	uc007bnl.3	0	ENSMUSG00000006538	Ihh	Indian hedgehog	uc007bnl.3;uc007bnm.2	16147;16147	0;0
chr12	83482544	83501518	18975	*	8.33	8.66	7.9	0.76	4.28e-09	1.14e-07	419.18	391.5	231	247.48	Promoter (<=1kb)	12	83213751	83487736	273986	2	70127	uc007odc.2	0	ENSMUSG00000021221	Dpf3	D4, zinc and double PHD fingers, family 3	uc007odc.2;uc007odd.3;uc007ode.3	70127;70127;70127	0;0;0
chr3	87994763	88006259	11497	*	7.7	8.09	7.17	0.93	4.35e-09	1.15e-07	280.56	264.86	143	144.21	Promoter (<=1kb)	3	87987531	88000356	12826	2	12032	uc008pto.2	0	ENSMUSG00000004892	Bcan	brevican	uc008pto.2;uc008ptp.2	12032;12032	0;0
chr2	118739235	118751112	11878	*	7.68	8.08	7.14	0.94	4.41e-09	1.17e-07	261.11	278.86	145	137.09	Promoter (<=1kb)	2	118745758	118748810	3053	1	100043272	uc012cbk.2	0	ENSMUSG00000074918	Inafm2	InaF motif containing 2	uc012cbk.2;uc008lsn.1;uc012cbl.1	100043272;214239;214239	0;11549;11549
chr9	65137345	65144316	6972	*	7.11	7.58	6.43	1.15	4.57e-09	1.2e-07	192.42	189.36	82	89.91	Promoter (<=1kb)	9	65141189	65185872	44684	1	19289	uc009qcv.2	0	ENSMUSG00000032394	Igdcc3	immunoglobulin superfamily, DCC subclass, member 3	uc009qcv.2;uc009qcw.2;uc012gvg.2;uc009qct.2;uc009qcu.2	19289;19289;56741;56741;56741	0;0;0;0;0
chr15	28037175	28084644	47470	*	9.65	9.87	9.39	0.48	4.64e-09	1.22e-07	960.85	907.82	662	677.45	Distal Intergenic	15	27730649	28025848	295200	2	223435	uc007vjw.1	-11327	ENSMUSG00000022263	Trio	triple functional domain (PTPRF interacting)	NA	NA	NA
chr8	88509090	88526852	17763	*	8.45	8.76	8.04	0.72	4.84e-09	1.27e-07	440.7	426.82	258	268.84	Promoter (<=1kb)	8	88521344	88594887	73544	1	93960	uc009mro.2	0	ENSMUSG00000031661	Nkd1	naked cuticle 1	uc009mro.2;uc012gia.1	93960;93960	0;-781
chr5	118154519	118176023	21505	*	8.27	8.61	7.84	0.77	4.88e-09	1.28e-07	402.63	378.11	219	237.69	Promoter (<=1kb)	5	118169764	118189478	19715	1	12123	uc008zgg.1	0	ENSMUSG00000046607	Hrk	harakiri, BCL2 interacting protein (contains only BH3 domain)	uc008zgg.1;uc008zge.1;uc008zgf.1	12123;231672;231672	0;0;0
chr17	56118660	56124865	6206	*	7.12	7.59	6.43	1.16	4.97e-09	1.3e-07	185.8	199.1	81	91.69	Promoter (<=1kb)	17	56119678	56121946	2269	2	76905	uc008dbb.1	0	ENSMUSG00000037095	Lrg1	leucine-rich alpha-2-glycoprotein 1	uc008dbd.2;uc008dbe.1;uc008daz.1;uc008dba.1;uc008dbb.1	20359;20359;66968;66968;76905	0;0;-1362;-1112;0
chr17	35374679	35382493	7815	*	7.12	7.58	6.42	1.16	4.98e-09	1.3e-07	196.97	186.31	79	92.58	Promoter (<=1kb)	17	35379617	35384674	5058	1	15015	uc008chm.2	0	ENSMUSG00000035929	H2-Q4	histocompatibility 2, Q region locus 4	uc008chm.2;uc057kxr.1;uc008chb.2	15015;15015;53817	0;0;0
chr15	82058265	82076973	18709	*	8.41	8.73	7.99	0.74	5.31e-09	1.38e-07	435.73	414.64	270	239.47	Promoter (<=1kb)	15	82059151	82066538	7388	1	328573	uc007wyb.1	0	ENSMUSG00000075524	4930407I10Rik	RIKEN cDNA 4930407I10 gene	uc007wyb.1;uc011zwp.1	328573;74369	0;0
chr10	79736056	79741703	5648	*	6.77	7.28	5.97	1.32	5.31e-09	1.38e-07	163.87	147.35	60	64.99	3' UTR	10	79716634	79736108	19475	1	15166	uc007fzn.1	19422	ENSMUSG00000020331	Hcn2	hyperpolarization-activated, cyclic nucleotide-gated K+ 2	uc007fzn.1;uc007fzo.2;uc011xhz.1	15166;216151;216151	0;0;0
chr6	83451274	83461395	10122	*	7.23	7.68	6.58	1.1	5.36e-09	1.39e-07	213.93	196.66	93	98.81	Promoter (<=1kb)	6	83362373	83455480	93108	2	194388	uc033isq.2	0	ENSMUSG00000034832	Tet3	tet methylcytosine dioxygenase 3	uc033isq.2;uc057lqp.1;uc033isr.2;uc012enz.1	194388;194388;194388;320775	0;0;0;9519
chr18	36711048	36732916	21869	*	8.49	8.82	8.08	0.74	5.4e-09	1.4e-07	465.53	435.34	294	245.7	Promoter (<=1kb)	18	36725064	36726815	1752	2	12475	uc008eof.2	0	ENSMUSG00000051439	Cd14	CD14 antigen	uc008eof.2;uc008eog.1;uc008eoh.1;uc008eoi.1	12475;71983;71983;71983	0;-2154;-2154;-2154
chr1	86667557	86676784	9228	*	7.37	7.8	6.75	1.05	5.43e-09	1.4e-07	226.76	217.97	100	114.84	Promoter (<=1kb)	1	86666293	86670573	4281	2	18159	uc007bvt.2	0	ENSMUSG00000026241	Nppc	natriuretic peptide type C	uc007bvt.2	18159	0
chr14	70874902	70905868	30967	*	8.96	9.23	8.62	0.61	5.58e-09	1.44e-07	623.18	575.38	387	399.7	Promoter (<=1kb)	14	70890107	70979840	89734	1	14586	uc007uoz.2	0	ENSMUSG00000022103	Gfra2	glial cell line derived neurotrophic factor family receptor alpha 2	uc007uoz.2;uc007upa.2;uc007upb.2;uc029sls.1	14586;14586;14586;73648	0;0;0;21969
chr8	70716313	70770884	54572	*	9.86	10.07	9.61	0.46	5.62e-09	1.45e-07	1068.43	1081.96	736	824.33	Promoter (<=1kb)	8	70718543	70722635	4093	1	100502950	uc009mbf.2	0	ENSMUSG00000095026	Gm3336	predicted gene 3336	uc009mbf.2;uc012gfe.1;uc009mbg.2;uc009mbh.2;uc009mbn.2;uc012gfg.1;uc009mbi.2;uc009mbj.2;uc057lxm.1;uc009mbk.2;uc009mbl.1;uc012gff.1;uc009mbm.1	100502950;100502950;110385;110385;18709;18709;19339;19339;19339;19339;234384;234384;65972	0;0;0;0;0;4468;0;0;0;0;0;0;0
chr17	38542930	38661452	118523	*	11.76	11.63	11.87	-0.24	5.63e-09	1.45e-07	3206.13	3127.75	3821	3671.22	Promoter (<=1kb)	17	38639447	38645653	6207	1	100126768	uc012ate.1	0	ENSMUSG00000092342	Esp31	exocrine gland secreted peptide 31	uc012ate.1;uc012atd.1	100126768;100126773	0;0
chr6	125351268	125381789	30522	*	8.71	9	8.35	0.66	5.79e-09	1.49e-07	514.35	512.06	311	340.06	Promoter (<=1kb)	6	125362651	125380504	17854	2	213522	uc009dum.1	0	ENSMUSG00000038167	Plekhg6	pleckstrin homology domain containing, family G (with RhoGef domain) member 6	uc009dum.1;uc009dul.2	213522;21937	0;0
chr8	70855966	70909833	53868	*	9.82	10.04	9.56	0.48	5.88e-09	1.51e-07	1026.64	1086.22	710	803.86	Promoter (<=1kb)	8	70895508	70895570	63	2	102465984	uc033jga.1	0	ENSMUSG00000098710	Mir7067	microRNA 7067	uc033jga.1;uc009mcc.1;uc009mbz.2;uc009mby.1;uc009mcd.2;uc012gfl.1;uc012gfm.1;uc009mca.2;uc009mcb.2;uc012gfj.1;uc009mbv.2;uc009mbw.2;uc009mbx.2;uc012gfk.1	102465984;104370;114479;234388;270058;270058;270058;76808;76808;84036;84036;84036;84036;84036	0;0;0;0;0;0;0;0;0;0;0;0;0;0
chr4	117922870	117935306	12437	*	7.64	8.04	7.09	0.95	5.9e-09	1.51e-07	250.76	274.6	133	138.87	Promoter (<=1kb)	4	117926160	117929763	3604	2	11876	uc008ujh.2	0	ENSMUSG00000028539	Artn	artemin	uc008ujh.2;uc008uji.2;uc008ujj.2;uc012djv.2;uc008ujk.3;uc008ujl.3;uc008ujm.3;uc033idz.1	11876;11876;11876;11876;20441;20441;20441;20441	0;0;0;0;0;0;0;0
chr18	66449662	66492181	42520	*	9.34	9.58	9.05	0.53	5.94e-09	1.51e-07	792.01	743.43	518	543.92	Promoter (<=1kb)	18	66458604	66465558	6955	1	58801	uc008fft.1	0	ENSMUSG00000024521	Pmaip1	phorbol-12-myristate-13-acetate-induced protein 1	uc008fft.1	58801	0
chr6	4711962	4756821	44860	*	9.47	9.7	9.19	0.51	5.95e-09	1.51e-07	826.77	837.8	610	560.83	Promoter (<=1kb)	6	4747306	4760517	13212	1	170676	uc009avv.2	0	ENSMUSG00000092035	Peg10	paternally expressed 10	uc009avv.2;uc009avp.2;uc009avq.2;uc009avr.2;uc009avs.2;uc009avt.2;uc009avu.2	170676;20392;20392;20392;20392;20392;20392	0;0;0;0;0;0;0
chr9	37421174	37441368	20195	*	8.41	8.73	8	0.73	6e-09	1.52e-07	429.53	420.73	243	268.84	Promoter (<=1kb)	9	37416045	37433175	17131	2	19649	uc012gqz.1	0	ENSMUSG00000032128	Robo3	roundabout guidance receptor 3	uc012gqz.1;uc009ouw.1	19649;19649	0;0
chr14	70550816	70556903	6088	*	6.68	7.2	5.85	1.35	6.01e-09	1.52e-07	145.66	148.56	55	60.53	Promoter (<=1kb)	14	70554056	70573548	19493	1	15460	uc007uoj.2	0	ENSMUSG00000022096	Hr	lysine demethylase and nuclear receptor corepressor	uc007uoj.2;uc007uoi.2	15460;72549	0;0
chr10	83394679	83419563	24885	*	8.61	8.92	8.21	0.71	6.02e-09	1.52e-07	494.49	474.92	268	323.15	Exon (uc011xkg.2/uc011xkg.2, exon 1 of 1)	10	83360221	83368835	8615	1	28109	uc007gkg.2	34458	ENSMUSG00000020255	D10Wsu102e	DNA segment, Chr 10, Wayne State University 102, expressed	NA	NA	NA
chr15	30376051	30396946	20896	*	8.7	9	8.32	0.69	6.09e-09	1.54e-07	538.35	488.92	343	294.66	Intron (uc007vjz.2/18163, intron 2 of 22)	15	30172593	31029344	856752	1	18163	uc007vjz.2	203458	ENSMUSG00000022240	Ctnnd2	catenin (cadherin associated protein), delta 2	uc007vjz.2;uc011zrs.2	18163;18163	0;0
chr8	51354624	51579049	224426	*	12.15	12.04	12.25	-0.21	6.1e-09	1.54e-07	4231.53	4195.7	4995	4776.86	Distal Intergenic	8	52356611	52403339	46729	1	330767	uc009lry.1	-777562	ENSMUSG00000110013	1190028D05Rik	RIKEN cDNA 1190028D05 gene	NA	NA	NA
chr19	26598354	26620288	21935	*	8.51	8.82	8.12	0.69	6.19e-09	1.56e-07	454.77	446.3	279	277.75	Promoter (<=1kb)	19	26605160	26778321	173162	1	67155	uc008hbn.1	0	ENSMUSG00000024921	Smarca2	SWI/SNF related, matrix associated, actin dependent regulator of chromatin, subfamily a, member 2	uc008hbn.1;uc012bjw.1	67155;67155	0;0
chr8	98290319	98428903	138585	*	11.49	11.34	11.63	-0.29	6.39e-09	1.61e-07	2642.53	2543.84	3293	3031.16	Distal Intergenic	8	99007127	99032740	25614	1	100873092	uc057lxr.1	-578224	ENSMUSG00000089819	Gm15679	predicted gene 15679	NA	NA	NA
chr13	96920244	96931159	10916	*	7.73	8.12	7.2	0.92	6.43e-09	1.61e-07	263.59	293.47	143	150.45	Promoter (<=1kb)	13	96924689	96950914	26226	1	218476	uc007rno.2	0	ENSMUSG00000091387	Gcnt4	glucosaminyl (N-acetyl) transferase 4, core 2 (beta-1,6-N-acetylglucosaminyltransferase)	uc007rno.2	218476	0
chr8	50104441	50243701	139261	*	11.52	11.38	11.65	-0.27	6.56e-09	1.64e-07	2671.08	2646.74	3323	3092.59	Distal Intergenic	8	50368112	50416089	47978	1	100039954	uc029wsx.1	-124411	ENSMUSG00000110281	Gm2516	predicted gene 2516	NA	NA	NA
chr5	101520306	101548392	28087	*	8.78	9.07	8.42	0.64	6.7e-09	1.67e-07	558.63	513.27	353	332.94	Distal Intergenic	5	101659184	101664711	5528	2	18096	uc008yim.2	116319	ENSMUSG00000035187	Nkx6-1	NK6 homeobox 1	NA	NA	NA
chr1	7119518	7134263	14746	*	8.17	8.52	7.72	0.8	6.74e-09	1.68e-07	373.25	361.67	194	227	5' UTR	1	7088920	7173628	84709	1	319263	uc007agb.1	30598	ENSMUSG00000051285	Pcmtd1	protein-L-isoaspartate (D-aspartate) O-methyltransferase domain containing 1	uc007agb.1;uc007agc.1;uc011why.1	319263;319263;319263	0;0;0
chr10	82980047	82987713	7667	*	7.16	7.61	6.49	1.11	6.77e-09	1.68e-07	194.07	196.05	93	87.24	Promoter (<=1kb)	10	82985497	83195900	210404	1	58250	uc007gke.2	0	ENSMUSG00000034612	Chst11	carbohydrate sulfotransferase 11	uc007gke.2;uc011xjs.2	58250;58250	0;0
chr9	106640295	106655992	15698	*	7.83	8.22	7.29	0.93	6.94e-09	1.72e-07	273.11	322.7	147	165.58	Promoter (<=1kb)	9	106644534	106656109	11576	2	108068	uc009rkj.3	117	ENSMUSG00000023192	Grm2	glutamate receptor, metabotropic 2	uc009rkj.3;uc012gzy.2;uc009rkk.2;uc009rkm.1;uc009rkl.2;uc009rkn.2;uc033jms.1	108068;108068;21767;21767;21767;21767;21767	0;0;29824;29942;29960;29960;29960
chr7	49971227	49981166	9940	*	7.41	7.83	6.81	1.02	6.99e-09	1.73e-07	222.62	231.98	110	114.84	Promoter (<=1kb)	7	49975350	50280036	304687	1	338352	uc009hbx.1	0	ENSMUSG00000055409	Nell1	NEL-like 1	uc009hbx.1;uc012flf.1;uc009hby.1	338352;338352;338352	0;0;0
chr7	19108601	19123180	14580	*	7.94	8.3	7.44	0.86	7.27e-09	1.8e-07	298.35	333.66	173	174.48	Promoter (<=1kb)	7	19119859	19138261	18403	1	243867	uc009fkt.2	0	ENSMUSG00000050428	Fbxo46	F-box protein 46	uc009fkt.2	243867	0
chr8	71407645	71473682	66038	*	10.39	10.56	10.2	0.37	7.44e-09	1.84e-07	1504.17	1519.73	1191	1156.38	Promoter (<=1kb)	8	71456700	71463657	6958	2	64296	uc009mdf.2	0	ENSMUSG00000007950	Abhd8	abhydrolase domain containing 8	uc009mdc.3;uc009mdd.3;uc009mdl.2;uc009mdm.2;uc009mdf.2;uc009mdg.2;uc009mdi.3;uc009mdk.3;uc057aly.1;uc057alz.2;uc057ama.1;uc009mdb.2;uc009mdh.1	234396;234396;382014;382014;64296;64296;66498;66498;66498;66498;66498;68251;94065	0;0;0;0;0;0;0;0;0;0;0;10790;0
chr18	65930037	65949067	19031	*	8.47	8.78	8.06	0.72	7.52e-09	1.85e-07	456.42	424.38	282	252.82	Promoter (<=1kb)	18	65934639	65939089	4451	2	19434	uc008ffl.1	0	ENSMUSG00000024518	Rax	retina and anterior neural fold homeobox	uc008ffl.1	19434	0
chr3	59002311	59014384	12074	*	7.7	8.08	7.17	0.91	7.61e-09	1.87e-07	271.04	269.73	144	144.21	Promoter (<=1kb)	3	59005825	59094888	89064	1	329650	uc008pig.1	0	ENSMUSG00000056476	Med12l	mediator complex subunit 12-like	uc008pig.1;uc008pih.1;uc008pii.3	329650;329650;329650	0;0;0
chr9	32664457	32699765	35309	*	9.18	9.43	8.87	0.56	7.62e-09	1.87e-07	680.7	698.98	443	490.51	Promoter (<=1kb)	9	32696042	32757820	61779	1	23871	uc009osb.1	0	ENSMUSG00000032035	Ets1	E26 avian leukemia oncogene 1, 5' domain	uc009osa.1;uc009osb.1;uc009osc.1	23871;23871;23871	0;0;0
chr8	100282002	100468803	186802	*	11.84	11.72	11.95	-0.23	7.82e-09	1.91e-07	3394.82	3351.2	3994	3900.01	Distal Intergenic	8	99416674	99733438	316765	1	234624	uc009mzs.2	865328	ENSMUSG00000052479	A330008L17Rik	RIKEN cDNA A330008L17 gene	NA	NA	NA
chr8	52601430	52754139	152710	*	11.62	11.49	11.74	-0.25	7.82e-09	1.91e-07	2852.33	2892.11	3488	3337.39	Distal Intergenic	8	52356611	52403339	46729	1	330767	uc009lry.1	244819	ENSMUSG00000110013	1190028D05Rik	RIKEN cDNA 1190028D05 gene	NA	NA	NA
chr15	103078290	103107330	29041	*	8.91	9.18	8.58	0.61	7.86e-09	1.92e-07	574.77	588.77	367	397.03	Distal Intergenic	15	103123070	103146828	23759	2	432989	uc029svj.1	39498	ENSMUSG00000097003	D930007P13Rik	Riken cDNA D930007P13 gene	NA	NA	NA
chr8	115115373	115206309	90937	*	10.62	10.78	10.43	0.35	8.64e-09	2.11e-07	1757	1754.75	1340	1423.44	Intron (uc009nod.2/80707, intron 8 of 8)	8	114439652	115352712	913061	1	80707	uc009nod.2	675721	ENSMUSG00000004637	Wwox	WW domain-containing oxidoreductase	uc009nod.2	80707	0
chr3	72928615	72971465	42851	*	9.46	9.19	9.69	-0.5	9.01e-09	2.19e-07	585.53	583.29	863	790.51	Promoter (<=1kb)	3	72888560	72966866	78307	2	69983	uc008pmq.1	0	ENSMUSG00000027790	Sis	sucrase isomaltase (alpha-glucosidase)	uc008pmq.1;uc012cqn.1	69983;69983	0;0
chr8	51807393	51922837	115445	*	11.14	10.99	11.27	-0.29	9.36e-09	2.27e-07	1989.14	2071.36	2492	2460.54	Distal Intergenic	8	52356611	52403339	46729	1	330767	uc009lry.1	-433774	ENSMUSG00000110013	1190028D05Rik	RIKEN cDNA 1190028D05 gene	NA	NA	NA
chr15	102352393	102382643	30251	*	8.83	9.1	8.49	0.61	9.62e-09	2.33e-07	544.56	555.29	354	364.99	Promoter (<=1kb)	15	102357177	102366271	9095	2	170574	uc007xvm.1	0	ENSMUSG00000060284	Sp7	Sp7 transcription factor 7	uc007xvm.1;uc007xvn.1;uc007xvl.2	170574;170574;223921	0;0;-1634
chr1	172317651	172342589	24939	*	8.62	8.92	8.25	0.67	9.62e-09	2.33e-07	501.11	465.17	302	306.23	Promoter (<=1kb)	1	172341210	172374085	32876	1	16513	uc007dqj.1	0	ENSMUSG00000044708	Kcnj10	potassium inwardly-rectifying channel, subfamily J, member 10	uc007dqb.2;uc007dqe.2;uc007dqj.1;uc007dqg.1;uc007dqh.1;uc007dqi.1	140559;140559;16513;16524;16524;16524	0;0;0;0;0;0
chr8	39550807	39723855	173049	*	11.82	11.7	11.92	-0.22	1.02e-08	2.46e-07	3347.65	3305.53	3904	3867.96	Promoter (<=1kb)	8	39581700	39642678	60979	2	20288	uc012gcm.1	0	ENSMUSG00000025044	Msr1	macrophage scavenger receptor 1	uc012gcm.1;uc009lmk.1	20288;20288	0;0
chr6	83414706	83430845	16140	*	8.21	8.57	7.73	0.84	1.06e-08	2.55e-07	404.7	356.19	186	238.58	Intron (uc009cni.3/194388, intron 2 of 10)	6	83362373	83441678	79306	2	194388	uc009cni.3	10833	ENSMUSG00000034832	Tet3	tet methylcytosine dioxygenase 3	uc009cni.3;uc033isq.2;uc057lqp.1;uc033isr.2;uc009cnl.1	194388;194388;194388;194388;194388	0;0;0;0;0
chr8	48196457	48241088	44632	*	9.81	10.02	9.57	0.45	1.06e-08	2.55e-07	1048.16	1024.11	728	789.62	3' UTR	8	48225665	48674690	449026	2	23965	uc009lrr.2	433602	ENSMUSG00000031561	Tenm3	teneurin transmembrane protein 3	uc009lrr.2;uc009lrs.2	23965;23965	0;0
chr17	26430511	26441147	10637	*	7.43	7.84	6.85	0.99	1.09e-08	2.61e-07	231.73	226.5	120	110.39	Exon (uc008bed.3/240055, exon 2 of 5)	17	26414965	26446349	31385	1	240055	uc008bed.3	15546	ENSMUSG00000034413	Neurl1b	neuralized E3 ubiquitin protein ligase 1B	uc008bed.3	240055	0
chr8	35727310	36296993	569684	*	13.39	13.47	13.3	0.17	1.09e-08	2.62e-07	11407.7	11274.4	9890	10289.9	Promoter (<=1kb)	8	36094828	36102744	7917	1	244418	uc009lld.2	0	ENSMUSG00000050271	Prag1	PEAK1 related kinase activating pseudokinase 1	uc009lld.2;uc009lle.2;uc009llf.2;uc009llj.1;uc029wsi.1;uc009llg.1;uc009llh.1;uc009llc.2	244418;244418;244418;244421;330737;330738;330738;71908	0;0;0;0;0;0;0;0
chr8	96507644	96765473	257830	*	12.37	12.28	12.46	-0.19	1.12e-08	2.68e-07	4973.47	4943.38	5691	5609.21	Exon (uc009mzl.1/uc009mzl.1, exon 1 of 2)	8	95864137	95888365	24229	2	14719	uc009mzi.1	-619279	ENSMUSG00000031672	Got2	glutamatic-oxaloacetic transaminase 2, mitochondrial	NA	NA	NA
chr5	125525863	125537931	12069	*	7.76	8.14	7.25	0.9	1.13e-08	2.69e-07	267.32	298.34	154	149.56	Promoter (<=1kb)	5	125532418	125792583	260166	1	208151	uc012eds.1	0	ENSMUSG00000070498	Tmem132b	transmembrane protein 132B	uc012eds.1	208151	0
chr10	21086937	21108362	21426	*	8.32	8.64	7.91	0.73	1.16e-08	2.76e-07	393.11	406.11	236	244.81	Distal Intergenic	10	21124930	21143092	18163	2	17863	uc011xbd.1	34730	ENSMUSG00000019982	Myb	myeloblastosis oncogene	NA	NA	NA
chr15	11033704	11039426	5723	*	7.07	7.54	6.38	1.15	1.19e-08	2.83e-07	188.28	182.66	93	73.89	Promoter (<=1kb)	15	11033717	11037968	4252	2	239336	uc007vgy.1	0	ENSMUSG00000060735	Rxfp3	relaxin family peptide receptor 3	uc007vgx.1;uc007vgy.1	22293;239336	32983;0
chr5	35272857	35287097	14241	*	7.73	8.1	7.22	0.89	1.2e-08	2.86e-07	276.42	273.38	149	148.66	Promoter (<=1kb)	5	35278566	35281763	3198	1	11553	uc009vdd.1	0	ENSMUSG00000045318	Adra2c	adrenergic receptor, alpha 2c	uc009vdd.1	11553	0
chr8	49080387	49573607	493221	*	13.33	13.25	13.41	-0.16	1.23e-08	2.91e-07	9788.46	9732.12	10897	10857	Exon (uc009lrw.1/uc009lrw.1, exon 1 of 7)	8	48225665	48674690	449026	2	23965	uc009lrs.2	-405697	ENSMUSG00000031561	Tenm3	teneurin transmembrane protein 3	NA	NA	NA
chr8	65837248	65996805	159558	*	11.69	11.56	11.8	-0.23	1.25e-08	2.95e-07	3051.78	3001.1	3596	3527.01	5' UTR	8	65618040	66471637	853598	1	72925	uc009lvj.2	219208	ENSMUSG00000036469	2020-03-01	membrane-associated ring finger (C3HC4) 1	uc009lvj.2;uc009lvk.2;uc009lvl.2	72925;72925;72925	0;0;0
chr13	47008236	47019879	11644	*	7.58	7.98	7.04	0.94	1.27e-08	3e-07	265.66	239.28	131	131.75	Promoter (<=1kb)	13	47012557	47014850	2294	2	105193	uc007qhp.2	0	ENSMUSG00000044231	Nhlrc1	NHL repeat containing 1	uc007qhp.2;uc007qhq.2	105193;22017	0;23338
chr10	127080175	127092426	12252	*	7.75	8.15	7.21	0.94	1.29e-08	3.05e-07	287.18	280.08	126	169.14	Promoter (1-2kb)	10	127078907	127093170	14264	1	216439	uc007hhx.2	1268	ENSMUSG00000025422	Agap2	ArfGAP with GTPase domain, ankyrin repeat and PH domain 2	uc007hhx.2;uc007hhy.2;uc007hhz.2;uc007hia.2	216439;216439;216440;216440	0;0;28734;28734
chrY	90819507	90828907	9401	*	6.36	6.93	5.41	1.52	1.32e-08	3.1e-07	122.07	121.16	36	48.96	Distal Intergenic	21	90785590	90816465	30876	1	170942	uc029yhf.1	33917	ENSMUSG00000096768	Erdr1	erythroid differentiation regulator 1	uc029yhc.1;uc029yhe.1;uc029yhf.1	170942;170942;170942	0;0;0
chr1	133328653	133366813	38161	*	9.47	9.7	9.19	0.51	1.35e-08	3.16e-07	807.33	855.46	557	610.68	Promoter (<=1kb)	1	133350674	133360320	9647	1	19701	uc007cqf.2	0	ENSMUSG00000070645	Ren1	renin 1 structural	uc007cqf.2;uc011wsa.2;uc007cqg.2;uc007cqh.4;uc007cqi.4;uc007cqb.1;uc007cqd.1;uc011wrz.1;uc033flf.1;uc007cqe.1;uc007cqc.1	19701;214253;214253;214253;214253;280287;280287;280287;280287;280287;68338	0;0;0;0;0;0;0;0;0;0;0
chr6	90308349	90318955	10607	*	7.28	7.71	6.67	1.04	1.36e-08	3.18e-07	211.45	208.23	98	105.93	3' UTR	6	90308351	90325185	16835	2	71797	uc012eov.1	6230	ENSMUSG00000056643	Chst13	carbohydrate sulfotransferase 13	uc009cxa.1;uc009cxb.1;uc012eov.1	243535;243535;71797	7079;6218;0
chr8	14329429	14352642	23214	*	8.41	8.72	8.01	0.7	1.39e-08	3.25e-07	419.18	421.34	257	259.05	Intron (uc009kyy.3/244310, intron 3 of 15)	8	14095875	14847687	751813	1	244310	uc009kyy.3	233554	ENSMUSG00000047495	Dlgap2	DLG associated protein 2	uc009kyy.3;uc012gac.2	244310;244310	0;0
chr4	137274090	137281706	7617	*	6.98	7.45	6.28	1.18	1.39e-08	3.25e-07	167.59	183.27	75	80.12	Promoter (<=1kb)	4	137277635	137299501	21867	1	22417	uc008viv.2	0	ENSMUSG00000036856	Wnt4	wingless-type MMTV integration site family, member 4	uc008viv.2	22417	0
chr12	18127057	18140123	13067	*	7.78	8.15	7.27	0.88	1.45e-08	3.39e-07	297.11	270.34	155	154.01	Distal Intergenic	12	17786147	17791926	5780	1	53602	uc007ncy.1	340910	ENSMUSG00000071379	Hpcal1	hippocalcin-like 1	NA	NA	NA
chr13	54946493	54962398	15906	*	7.88	8.24	7.4	0.84	1.46e-08	3.4e-07	298.76	307.48	175	163.8	Promoter (<=1kb)	13	54949411	55006018	56608	1	107448	uc007qpp.2	0	ENSMUSG00000025876	Unc5a	unc-5 netrin receptor A	uc007qpp.2;uc007qpq.2	107448;107448	0;0
chr1	120334681	120344562	9882	*	7.42	7.84	6.84	1	1.47e-08	3.42e-07	236.69	220.41	123	105.93	Promoter (<=1kb)	1	120340582	120343174	2593	1	226359	uc007cjk.1	0	ENSMUSG00000036907	C1ql2	complement component 1, q subcomponent-like 2	uc007cjk.1	226359	0
chr19	41435355	41443642	8288	*	7.47	7.88	6.91	0.97	1.49e-08	3.46e-07	240.83	228.93	123	117.51	Distal Intergenic	19	41482645	41556614	73970	1	212391	uc008hlx.1	-39003	ENSMUSG00000025019	Lcor	ligand dependent nuclear receptor corepressor	NA	NA	NA
chr9	24758912	24784309	25398	*	9.03	9.28	8.72	0.57	1.52e-08	3.52e-07	614.08	631.39	432	408.61	Promoter (<=1kb)	9	24720812	24774303	53492	2	57246	uc009ope.2	0	ENSMUSG00000031965	Tbx20	T-box 20	uc009ope.2;uc009opf.2;uc029wyb.1;uc009opg.2	57246;57246;57246;57246	0;0;0;0
chr18	25673329	25685993	12665	*	7.71	8.08	7.2	0.88	1.56e-08	3.6e-07	272.28	270.34	149	145.1	3' UTR	18	25477620	25753983	276364	2	108013	uc008ehk.2	67990	ENSMUSG00000024268	Celf4	CUGBP, Elav-like family member 4	uc008ehk.2;uc008ehl.2;uc012ban.1;uc012bao.1;uc012bap.1;uc012baq.1	108013;108013;108013;108013;108013;108013	0;0;0;0;0;0
chr1	89958579	90000426	41848	*	9.38	9.62	9.11	0.51	1.58e-08	3.65e-07	757.26	814.66	547	554.6	Exon (uc007bzd.1/208372, exon 2 of 6)	1	89952678	90014577	61900	2	208372	uc007bzd.1	14151	ENSMUSG00000067081	Asb18	ankyrin repeat and SOCS box-containing 18	uc007bzd.1;uc007bze.1;uc011wpb.1	208372;208372;208372	0;0;0
chr18	75810845	75824923	14079	*	7.89	8.25	7.41	0.84	1.59e-08	3.66e-07	298.76	311.74	179	162.02	Promoter (<=1kb)	18	75820178	76148561	328384	1	207259	uc008fqh.1	0	ENSMUSG00000044646	Zbtb7c	zinc finger and BTB domain containing 7C	uc008fqh.1;uc008fqi.1	207259;207259	0;0
chr13	3332190	3365948	33759	*	9.42	9.66	9.12	0.53	1.62e-08	3.74e-07	855.74	759.86	536	580.42	Distal Intergenic	13	3478260	3485220	6961	1	76937	uc007pit.1	-112312	ENSMUSG00000097709	2810429I04Rik	RIKEN cDNA 2810429I04 gene	NA	NA	NA
chr4	147381637	147587489	205853	*	13.31	13.39	13.23	0.16	1.63e-08	3.75e-07	10849	10635.1	9710	9494.08	Promoter (<=1kb)	4	147500686	147513420	12735	1	195531	uc057lky.1	0	ENSMUSG00000078496	Zfp982	zinc finger protein 982	uc008vsu.3;uc029vau.1;uc057lky.1;uc008vsy.2	195531;195531;195531;433804	0;0;0;0
chr9	89899069	89915013	15945	*	8.12	8.46	7.69	0.77	1.68e-08	3.86e-07	354.21	348.27	209	202.97	Promoter (<=1kb)	9	89909775	89915847	6073	1	19417	uc009qzr.1	0	ENSMUSG00000032356	Rasgrf1	RAS protein-specific guanine nucleotide-releasing factor 1	uc009qzr.1;uc009qzs.1;uc009qzt.1	19417;19417;19417	0;0;0
chr8	117609330	117835567	226238	*	11.99	12.09	11.87	0.23	1.69e-08	3.86e-07	4364.36	4385.05	3614	3860.84	Promoter (<=1kb)	8	117701946	117759029	57084	1	15486	uc009npf.1	0	ENSMUSG00000031844	Hsd17b2	hydroxysteroid (17-beta) dehydrogenase 2	uc009npf.1;uc009npc.2;uc057ane.1;uc009npg.1;uc009npd.1;uc009npe.1	15486;234779;330850;68533;74032;74032	0;0;0;0;0;0
chr5	38272174	38281364	9191	*	7.47	7.87	6.9	0.97	1.71e-08	3.91e-07	246.63	222.84	116	122.85	Promoter (<=1kb)	5	38275972	38304217	28246	1	21906	uc012dvn.1	0	ENSMUSG00000051596	Otop1	otopetrin 1	uc012dvn.1;uc008xgm.1;uc008xgj.1;uc008xgk.1	21906;21906;66309;66309	0;0;11799;11799
chr17	26199637	26210196	10560	*	7.33	7.77	6.72	1.05	1.8e-08	4.1e-07	199.45	235.63	107	103.26	Promoter (<=1kb)	17	26199183	26201350	2168	2	14570	uc008bdp.1	0	ENSMUSG00000073433	Arhgdig	Rho GDP dissociation inhibitor (GDI) gamma	uc008bdv.2;uc008bdw.2;uc008bdm.2;uc008bdn.2;uc008bdp.1;uc008bdq.1;uc008bdr.1;uc008bds.1;uc008bdt.1;uc057kwu.1;uc008bdo.1;uc012ans.1	106581;106581;12005;12005;14570;50782;50782;50782;50782;50782;69191;69191	34046;34046;60951;60951;0;0;0;0;0;0;-550;-550
chr7	132313335	132326343	13009	*	7.72	8.09	7.21	0.88	1.84e-08	4.19e-07	283.04	262.42	147	148.66	Promoter (<=1kb)	7	132315664	132318291	2628	1	100043682	uc012fvc.1	0	ENSMUSG00000109270	Gm10584	predicted gene 10584	uc012fvc.1;uc009kbx.1;uc009kby.1	100043682;77590;77590	0;0;0
chr11	82927375	82938651	11277	*	7.67	8.05	7.15	0.9	1.93e-08	4.39e-07	262.76	266.07	149	135.31	3' UTR	11	82911253	82929745	18493	1	217012	uc007knu.2	16122	ENSMUSG00000018845	Unc45b	unc-45 myosin chaperone B	uc007knu.2;uc007knv.2;uc007knw.1;uc007knx.2	217012;217012;217012;76392	0;0;0;0
chr2	37785189	37796635	11447	*	7.52	7.92	6.97	0.95	1.95e-08	4.42e-07	240.42	244.16	135	115.73	Exon (uc008jnf.2/241324, exon 3 of 13)	2	37776249	37799103	22855	1	241324	uc008jnf.2	8940	ENSMUSG00000035403	Crb2	crumbs family member 2	uc008jng.2;uc008jnh.2;uc008jni.2;uc008jnf.2	227801;227801;227801;241324	0;0;0;0
chr5	67597740	67612030	14291	*	7.92	8.28	7.45	0.82	1.97e-08	4.47e-07	309.11	310.52	170	180.71	Promoter (<=1kb)	5	67607883	67613987	6105	1	330096	uc008xpy.2	0	ENSMUSG00000050010	Shisa3	shisa family member 3	uc008xpy.2	330096	0
chr5	33691804	33712144	20341	*	8.06	8.4	7.62	0.78	2.02e-08	4.58e-07	342.63	332.44	194	198.52	Distal Intergenic	5	33721724	33737068	15345	1	14184	uc008xbe.3	-9580	ENSMUSG00000054252	Fgfr3	fibroblast growth factor receptor 3	NA	NA	NA
chr5	135863988	135874198	10211	*	7.49	7.89	6.93	0.95	2.06e-08	4.65e-07	236.69	236.24	118	126.41	3' UTR	5	135818106	135874772	56667	1	58212	uc008zzb.1	45882	ENSMUSG00000039860	Srrm3	serine/arginine repetitive matrix 3	uc008zzb.1;uc008zzc.1	58212;58212	0;0
chr14	107968365	108071803	103439	*	10.69	10.52	10.84	-0.32	2.12e-08	4.78e-07	1465.68	1480.76	1866	1808.9	Distal Intergenic	14	108909988	108914239	4252	2	76965	uc007uyc.2	842436	ENSMUSG00000075478	Slitrk1	SLIT and NTRK-like family, member 1	NA	NA	NA
chr2	131048749	131064161	15413	*	7.91	8.27	7.45	0.82	2.13e-08	4.8e-07	307.04	308.7	175	174.48	Promoter (<=1kb)	2	131050822	131054361	3540	2	110751	uc008mkk.3	0	ENSMUSG00000027318	Adam33	a disintegrin and metallopeptidase domain 33	uc008mkk.3;uc008mkl.3;uc008mkm.3;uc008mkn.3;uc057lee.1	110751;110751;110751;110751;110751	0;0;0;0;0
chr17	35193381	35213183	19803	*	8.44	8.74	8.05	0.69	2.15e-08	4.82e-07	426.21	428.64	263	267.95	Promoter (<=1kb)	17	35194972	35195049	78	1	102465588	uc033hdg.1	0	ENSMUSG00000098291	Mir6973a	microRNA 6973a	uc033hdg.1;uc033hdh.1;uc008cgn.1;uc008cgo.2;uc008cgu.2;uc008cgp.2;uc008cgq.2;uc008cgr.2;uc012arb.2	102465588;102466990;16988;16988;16992;16994;16994;21926;21926	0;0;-4941;-4941;0;0;0;0;0
chr4	127985902	127989521	3620	*	5.65	6.32	4.36	1.96	2.17e-08	4.85e-07	79.86	79.76	17	24.04	Promoter (<=1kb)	4	127988044	128339657	351614	1	329942	uc008uuy.1	0	ENSMUSG00000028804	Csmd2	CUB and Sushi multiple domains 2	uc008uuy.1;uc008uuz.1;uc033ies.1	329942;329942;329942	0;0;0
chr7	19463919	19479810	15892	*	7.8	8.17	7.31	0.86	2.3e-08	5.15e-07	298.76	277.03	166	152.23	Distal Intergenic	7	19426075	19458494	32420	2	232944	uc012fbe.1	-5425	ENSMUSG00000030397	Mark4	MAP/microtubule affinity regulating kinase 4	NA	NA	NA
chr8	49860589	49981618	121030	*	11.36	11.22	11.49	-0.26	2.33e-08	5.2e-07	2414.11	2367.88	2943	2801.49	Distal Intergenic	8	50368112	50416089	47978	1	100039954	uc029wsx.1	-386494	ENSMUSG00000110281	Gm2516	predicted gene 2516	NA	NA	NA
chr8	88413170	88506357	93188	*	10.76	10.92	10.58	0.34	2.54e-08	5.65e-07	1916.31	1945.94	1458	1603.27	Distal Intergenic	8	88521344	88594887	73544	1	93960	uc009mro.2	-14987	ENSMUSG00000031661	Nkd1	naked cuticle 1	NA	NA	NA
chr9	87719002	87758262	39261	*	9.58	9.8	9.33	0.46	2.55e-08	5.68e-07	885.95	891.99	665	624.93	Promoter (<=1kb)	9	87702800	87731260	28461	2	76365	uc009qyh.2	0	ENSMUSG00000032419	Tbx18	T-box18	uc009qyh.2	76365	0
chr13	107885905	107898143	12239	*	7.56	7.95	7.02	0.93	2.55e-08	5.68e-07	236.28	259.38	128	131.75	Promoter (<=1kb)	13	107724617	107890064	165448	2	67263	uc007rup.2	0	ENSMUSG00000032846	Zswim6	zinc finger SWIM-type containing 6	uc007rup.2;uc007ruq.2	67263;67263	0;0
chr19	44503798	44516440	12643	*	7.83	8.2	7.32	0.89	2.72e-08	6.04e-07	313.66	276.43	144	175.37	3' UTR	19	44493472	44514273	20802	1	22423	uc008hpt.2	10326	ENSMUSG00000036961	Wnt8b	wingless-type MMTV integration site family, member 8B	uc008hpt.2;uc008hpu.1;uc012bmg.1	22423;240667;240667	0;29408;29408
chr8	84837275	85123136	285862	*	12.25	12.4	12.09	0.31	2.75e-08	6.08e-07	5285.48	5526.07	4192	4504.46	Promoter (<=1kb)	8	84913335	84914512	1178	1	100503676	uc009mob.2	0	ENSMUSG00000003812	Gm38426	predicted gene, 38426	uc009mob.2;uc009moc.2;uc012ghp.1;uc009mnj.1;uc033jgl.1;uc033jgk.1;uc009mnp.1;uc009moa.1;uc012ghn.2;uc009mnz.2;uc009moq.2;uc009mor.2;uc009mos.2;uc009mot.2;uc009mpk.1;uc009mnk.2;uc009mnl.2;uc009mnm.2;uc009mnn.2;uc009mno.2;uc009mov.2;uc009mow.4;uc009moz.3;uc009mpa.3;uc012gho.2;uc009mom.3;uc057cch.2;uc009mon.1;uc009mog.1;uc009moh.1;uc009moi.1;uc009moj.1;uc009mpl.1;uc009mnx.2;uc009mny.2;uc009mpb.1;uc0…	100503676;100503676;100503710;102060;102465648;102466220;12317;13423;16477;16596;170833;170833;170833;170833;17159;19358;19358;19358;19358;19358;212989;212989;212999;212999;212999;21672;21672;21672;234542;234542;234542;234542;244556;270076;270076;320466;320466;330817;330817;330817;414077;414077;56495;56527;56527;56527;66590;66590;66590;66590;67836;68544;68628;68628;69724;69724;71846;71846;71846;7…	0;0;0;4993;0;0;0;0;0;0;0;0;0;0;0;0;0;0;0;0;0;0;0;0;0;0;0;0;0;0;0;0;0;0;0;0;0;0;0;0;0;0;0;0;0;0;0;0;0;0;0;0;0;0;0;0;0;0;0;0
chr10	52013184	52034420	21237	*	8.83	9.1	8.49	0.61	2.76e-08	6.09e-07	535.87	561.98	381	337.39	Promoter (<=1kb)	10	52022502	52028471	5970	1	215031	uc007faz.2	0	ENSMUSG00000049641	Vgll2	vestigial like family member 2	uc007faz.2;uc007fba.2	215031;215031	0;0
chr11	4743349	4754599	11251	*	7.55	7.94	7.02	0.93	2.83e-08	6.25e-07	243.73	249.03	122	137.09	Promoter (<=1kb)	11	4738821	4746778	7958	2	192650	uc007hve.1	0	ENSMUSG00000009075	Cabp7	calcium binding protein 7	uc007hve.1	192650	0
chr11	89296452	89310222	13771	*	7.76	8.13	7.27	0.87	2.85e-08	6.27e-07	279.32	282.51	167	140.65	Promoter (<=1kb)	11	89300638	89302559	1922	2	18121	uc007kwh.2	0	ENSMUSG00000048616	Nog	noggin	uc007kwh.2	18121	0
chr15	79252019	79274428	22410	*	8.35	8.66	7.95	0.71	2.86e-08	6.29e-07	412.15	395.15	238	255.49	Promoter (<=1kb)	15	79251016	79254748	3733	2	57274	uc007wta.1	0	ENSMUSG00000032988	Slc16a8	solute carrier family 16 (monocarboxylic acid transporters), member 8	uc007wsy.2;uc007wsz.1;uc007wtb.1;uc007wtc.1;uc007wta.1	18693;18693;207495;207495;57274	22846;22637;0;0;0
chr11	4943440	4950943	7504	*	7.2	7.64	6.57	1.07	3.17e-08	6.96e-07	195.73	203.36	85	105.04	Promoter (<=1kb)	11	4947521	5042794	95274	1	11764	uc007hvn.2	0	ENSMUSG00000009090	Ap1b1	adaptor protein complex AP-1, beta 1 subunit	uc007hvn.2;uc007hvm.2	11764;380684	0;0
chr18	47361731	47375260	13530	*	7.88	8.24	7.4	0.84	3.29e-08	7.21e-07	285.52	318.44	171	167.36	Promoter (<=1kb)	18	47245254	47368870	123617	2	20358	uc008ewa.2	0	ENSMUSG00000019647	Sema6a	sema domain, transmembrane domain (TM), and cytoplasmic domain, (semaphorin) 6A	uc008ewa.2;uc008ewb.2;uc008ewc.2;uc008ewd.2	20358;20358;20358;20358	0;0;0;0
chr1	187598024	187613038	15015	*	8.08	8.42	7.63	0.79	3.37e-08	7.38e-07	342.63	342.18	182	214.54	Promoter (<=1kb)	1	187609006	188214884	605879	1	26381	uc007eaa.2	0	ENSMUSG00000026610	Esrrg	estrogen-related receptor gamma	uc007eaa.2	26381	0
chr8	30987974	31182659	194686	*	11.72	11.83	11.6	0.23	3.44e-08	7.51e-07	3629.45	3627.02	3036	3154.9	Promoter (<=1kb)	8	31150316	31160089	9774	1	234138	uc009ljf.3	0	ENSMUSG00000031577	Tti2	TELO2 interacting protein 2	uc009ljj.3;uc033jev.2;uc009ljk.2;uc009ljl.2;uc012gby.2;uc009ljf.3;uc009ljg.2;uc009ljh.2;uc009ljb.1;uc009ljc.1;uc009lji.1;uc009ljd.2;uc009lje.2	171167;171167;171167;171167;171167;234138;234138;234138;66959;66959;67920;68867;68867	0;0;0;0;0;0;0;0;0;0;0;0;0
chr4	82534178	82551962	17785	*	8.35	8.66	7.96	0.71	3.52e-08	7.67e-07	422.08	389.67	254	243.92	Distal Intergenic	4	82495984	82505779	9796	2	18028	uc008tki.3	-28399	ENSMUSG00000008575	Nfib	nuclear factor I/B	NA	NA	NA
chr17	30447322	30923747	476426	*	13.45	13.53	13.37	0.16	3.57e-08	7.78e-07	11671.7	11939.9	10470	10693.2	Promoter (<=1kb)	17	30592861	30612659	19799	2	109801	uc012aos.2	0	ENSMUSG00000024026	Glo1	glyoxalase 1	uc012aos.2;uc012aot.2;uc008btz.1;uc008bua.1;uc008bub.1;uc008buc.1;uc008bud.1;uc008btt.2;uc008btu.2;uc012aoq.1;uc008btw.2;uc008bty.2	109801;109801;13417;13417;13417;13417;14652;224671;224671;224671;224671;67522	0;0;0;0;0;0;0;0;0;0;0;0
chr8	55849984	56102969	252986	*	12.37	12.28	12.46	-0.19	3.65e-08	7.94e-07	4918.85	5001.83	5751	5550.45	Promoter (<=1kb)	8	55940825	56125352	184528	1	110304	uc009lsn.1	0	ENSMUSG00000038257	Glra3	glycine receptor, alpha 3 subunit	uc009lsn.1;uc009lsm.2	110304;244486	0;0
chr8	54874981	55116592	241612	*	12.32	12.22	12.41	-0.19	3.71e-08	8.06e-07	4836.92	4719.93	5507	5391.11	Promoter (<=1kb)	8	54954728	55060878	106151	1	234267	uc009lsl.2	0	ENSMUSG00000031517	Gpm6a	glycoprotein m6a	uc029wtb.1;uc009lsl.2;uc029wtc.1	234267;234267;234267	0;0;0
chr5	64152230	64166645	14416	*	7.98	8.36	7.48	0.87	3.72e-08	8.06e-07	316.56	338.53	151	206.53	Promoter (<=1kb)	5	64159451	64351486	192036	1	57915	uc008xmm.2	0	ENSMUSG00000029174	Tbc1d1	TBC1 domain family, member 1	uc008xmm.2;uc008xml.2;uc057buh.1	57915;57915;57915	0;0;0
chr16	35473987	35563640	89654	*	11.2	11.33	11.07	0.27	3.87e-08	8.36e-07	2577.15	2576.11	2129	2158.76	Promoter (<=1kb)	16	35541362	35664258	122897	1	20357	uc007zbm.2	0	ENSMUSG00000052133	Sema5b	sema domain, seven thrombospondin repeats (type 1 and type 1-like), transmembrane domain (TM) and short cytoplasmic domain, (semaphorin) 5B	uc007zbm.2;uc012aez.1;uc029swy.1;uc007zbl.1	20357;20357;69768;72599	0;0;0;0
chr4	131835325	131841798	6474	*	6.61	7.12	5.8	1.32	3.89e-08	8.41e-07	143.59	135.17	49	62.31	Promoter (<=1kb)	4	131768457	131838278	69822	2	19273	uc008vaa.1	0	ENSMUSG00000028909	Ptpru	protein tyrosine phosphatase, receptor type, U	uc008vaa.1;uc008vab.1;uc008vac.1;uc008vae.2	19273;19273;19273;26922	0;0;0;-1673
chr4	47719209	47739693	20485	*	8.37	8.67	7.98	0.7	3.91e-08	8.44e-07	398.49	418.29	256	248.37	Distal Intergenic	4	47474661	47483233	8573	1	66212	uc008sur.1	244548	ENSMUSG00000053317	Sec61b	Sec61 beta subunit	NA	NA	NA
chr8	120198485	120280526	82042	*	10.34	10.52	10.14	0.38	3.92e-08	8.44e-07	1433.82	1497.2	1077	1180.42	Promoter (<=1kb)	8	120204434	120228230	23797	2	434353	uc009nqy.1	0	ENSMUSG00000097960	A330074K22Rik	RIKEN cDNA A330074K22 gene	uc009nqy.1	434353	0
chr3	145645217	145659219	14003	*	7.81	8.16	7.33	0.83	4.38e-08	9.4e-07	297.11	276.43	159	162.91	Promoter (<=1kb)	3	145646971	145649985	3015	2	16007	uc008rqq.2	0	ENSMUSG00000028195	Cyr61	cysteine rich protein 61	uc008rqq.2	16007	0
chr8	4204086	4221811	17726	*	8.06	8.39	7.63	0.76	4.5e-08	9.66e-07	336.01	336.09	206	189.61	Promoter (<=1kb)	8	4206232	4211257	5026	1	213027	uc009ktf.1	0	ENSMUSG00000011832	Evi5l	ecotropic viral integration site 5 like	uc009ktc.1;uc012fza.2;uc009kte.2;uc009ktf.1;uc012fzb.1	213027;213027;213027;213027;73072	37519;0;0;0;0
chr11	74519052	74534911	15860	*	8.02	8.36	7.58	0.78	4.53e-08	9.7e-07	316.97	338.53	194	187.83	Intron (uc007kbx.1/380711, intron 2 of 24)	11	74383483	74590158	206676	2	380711	uc007kbx.1	55247	ENSMUSG00000038807	Rap1gap2	RAP1 GTPase activating protein 2	uc007kbx.1;uc007kby.1	380711;380711	0;0
chr10	71153813	71166918	13106	*	7.88	8.22	7.41	0.81	4.8e-08	1.03e-06	307.45	290.43	173	168.25	Promoter (<=1kb)	10	70925086	71159634	234549	2	83675	uc007fog.3	0	ENSMUSG00000014329	Bicc1	BicC family RNA binding protein 1	uc007foj.2;uc007fok.2;uc007fog.3;uc007foh.3;uc057kja.1	319572;319572;83675;83675;83675	15122;15122;0;0;0
chr14	107327420	107443191	115772	*	10.86	10.7	11.01	-0.31	4.96e-08	1.06e-06	1663.48	1653.07	2134	1976.26	Distal Intergenic	14	106417187	106486520	69334	2	73631	uc007uyb.3	-840900	ENSMUSG00000099794	1700128A07Rik	RIKEN cDNA 1700128A07 gene	NA	NA	NA
chr5	143245594	143256504	10911	*	7.53	7.92	7	0.91	5.05e-08	1.08e-06	233.8	250.24	133	123.74	3' UTR	5	143235163	143248834	13672	1	231866	uc009ajt.2	10431	ENSMUSG00000029587	Zfp12	zinc finger protein 12	uc009ajt.2;uc009aju.2;uc009ajv.2;uc009ajw.2	231866;231866;231866;54201	0;0;0;0
chr8	62812401	63047091	234691	*	12.19	12.09	12.28	-0.19	5.09e-08	1.08e-06	4362.29	4336.95	5055	4893.48	Promoter (<=1kb)	8	62951232	63357098	405867	1	72902	uc009lur.2	0	ENSMUSG00000054162	Spock3	sparc/osteonectin, cwcv and kazal-like domains proteoglycan 3	uc009lur.2;uc033jfr.2;uc057lxj.1	72902;72902;72902	0;0;0
chr4	107430333	107439147	8815	*	7.48	7.87	6.94	0.93	5.2e-08	1.1e-06	228	239.28	121	124.63	Promoter (<=1kb)	4	107434591	107439094	4504	1	230587	uc008tzu.1	0	ENSMUSG00000034762	Glis1	GLIS family zinc finger 1	uc008tzu.1;uc008tzv.1;uc029uyn.1	230587;230587;230587	0;0;0
chr14	118911338	118929589	18252	*	8.05	8.4	7.59	0.8	5.32e-08	1.13e-06	318.63	354.97	178	208.31	Promoter (<=1kb)	14	118875520	118913155	37636	2	66573	uc007uyy.1	0	ENSMUSG00000042156	Dzip1	DAZ interacting protein 1	uc007uyy.1;uc011zqf.1;uc007uza.2;uc007uzc.1	66573;66573;66573;66573	0;0;0;0
chr8	27810057	28357799	547743	*	13.38	13.31	13.46	-0.15	5.43e-08	1.15e-06	10137.7	10128.5	11268	11192.6	Promoter (<=1kb)	8	28083194	28084853	1660	2	666422	uc012gbt.1	0	ENSMUSG00000110372	Gm8096	3-phosphoglycerate dehydrogenase pseudogene	uc012gbt.1	666422	0
chr13	60168196	60176157	7962	*	7.06	7.5	6.42	1.08	5.47e-08	1.16e-06	177.93	183.88	89	81.9	Promoter (1-2kb)	13	60174405	60177535	3131	2	14451	uc007qvi.2	1378	ENSMUSG00000052957	Gas1	growth arrest specific 1	uc007qvi.2	14451	0
chr15	102023691	102030126	6436	*	6.67	7.16	5.91	1.25	5.48e-08	1.16e-06	143.59	143.08	61	59.64	Promoter (<=1kb)	15	102028216	102032026	3811	1	16668	uc007xuj.2	0	ENSMUSG00000023043	Krt18	keratin 18	uc007xuj.2	16668	0
chr7	19519192	19525736	6545	*	6.99	7.44	6.33	1.12	5.79e-08	1.22e-06	171.31	177.18	74	86.35	Promoter (<=1kb)	7	19518731	19525050	6320	1	69547	uc009fme.2	461	ENSMUSG00000060621	Nkpd1	NTPase, KAP family P-loop domain containing 1	uc009fmb.1;uc009fmc.1;uc009fmd.1;uc009fme.2	67091;67091;67091;69547	10463;10463;10463;0
chr8	42081346	42244437	163092	*	11.61	11.48	11.73	-0.25	5.79e-08	1.22e-06	2883.78	2826.36	3528	3267.07	Distal Intergenic	8	41827267	42046202	218936	1	69966	uc029wst.1	254079	ENSMUSG00000102046	2810404M03Rik	RIKEN cDNA 2810404M03 gene	NA	NA	NA
chr7	141290132	141295537	5406	*	6.84	7.31	6.13	1.19	5.81e-08	1.22e-06	150.62	167.44	73	66.77	Promoter (<=1kb)	7	141292006	141295001	2996	1	13491	uc009kkm.1	0	ENSMUSG00000025496	Drd4	dopamine receptor D4	uc009kkm.1;uc009kkn.2;uc009kko.3;uc033jdc.1;uc009kkp.2	13491;54006;54006;54006;54006	0;32188;32188;32188;43246
chr15	31364049	31373483	9435	*	7.44	7.83	6.89	0.93	5.83e-08	1.22e-06	229.25	225.28	123	114.84	Promoter (<=1kb)	15	31291479	31367759	76281	2	67434	uc007vkd.3	0	ENSMUSG00000022237	Ankrd33b	ankyrin repeat domain 33B	uc007vkd.3;uc007vke.3;uc011zru.2;uc011zrv.2;uc007vkf.2	67434;67434;67434;67434;67434	0;0;0;0;0
chr8	123624341	123783808	159468	*	11.45	11.57	11.33	0.24	5.88e-08	1.23e-06	3032.75	3041.89	2576	2567.36	Promoter (<=1kb)	8	123733958	123739941	5984	1	234863	uc029wwv.1	0	ENSMUSG00000110599	6030466F02Rik	RIKEN cDNA 6030466F02 gene	uc029wwv.1;uc009nwm.1	234863;69581	0;0
chr8	70346322	70390007	43686	*	9.7	9.9	9.47	0.43	5.97e-08	1.25e-06	967.05	941.31	693	721.07	Promoter (<=1kb)	8	70373548	70382066	8519	1	12845	uc009mad.2	0	ENSMUSG00000031849	Comp	cartilage oligomeric matrix protein	uc009mad.2;uc009mab.2;uc012gfa.1;uc009mae.1	12845;19704;19704;382056	0;0;0;0
chr6	83063338	83076192	12855	*	7.87	8.23	7.39	0.83	6.1e-08	1.27e-06	302.9	296.52	151	185.16	Promoter (<=1kb)	6	83068325	83070225	1901	2	21909	uc009cme.1	0	ENSMUSG00000068327	Tlx2	T cell leukemia, homeobox 2	uc009cme.1;uc009cmf.1;uc009cmg.1;uc009cmh.1;uc009cmb.1;uc009cmc.1;uc009cmd.1	21909;21909;69837;69837;93838;93838;93838	0;0;-2198;-2438;5494;0;0
chr19	42197174	42208402	11229	*	7.68	8.07	7.14	0.93	6.21e-08	1.29e-06	274.35	264.86	118	164.69	Promoter (<=1kb)	19	42197971	42202252	4282	2	54612	uc008hnl.2	0	ENSMUSG00000018822	Sfrp5	secreted frizzled-related sequence protein 5	uc008hnj.3;uc012blu.2;uc012blv.2;uc008hnl.2	319740;319740;319740;54612	26607;26607;26607;0
chr15	84618933	84628556	9624	*	7.23	7.65	6.63	1.01	6.35e-08	1.32e-06	201.11	200.32	107	91.69	Distal Intergenic	15	84663244	84703673	40430	1	109270	uc007xcd.1	-34688	ENSMUSG00000036106	Prr5	proline rich 5 (renal)	NA	NA	NA
chr13	53229654	53244452	14799	*	7.76	8.11	7.28	0.83	6.41e-08	1.33e-06	279.73	273.38	158	153.12	Intron (uc007qnj.1/26564, intron 1 of 8)	13	53109317	53286109	176793	2	26564	uc007qnj.1	41657	ENSMUSG00000021464	Ror2	receptor tyrosine kinase-like orphan receptor 2	uc007qnj.1	26564	0
chr13	45959642	45973535	13894	*	7.65	8.02	7.15	0.87	6.53e-08	1.36e-06	251.59	266.68	146	137.98	Promoter (<=1kb)	13	45549755	45964991	415237	2	20238	uc011yyv.3	0	ENSMUSG00000046876	Atxn1	ataxin 1	uc011yyv.3;uc011yyw.3;uc011yyx.3	20238;20238;20238	0;0;0
chr8	47678023	47909437	231415	*	12.03	12.13	11.93	0.2	6.62e-08	1.37e-06	4500.08	4459.94	3902	3915.14	Promoter (<=1kb)	8	47822143	47822805	663	1	100039801	uc012gdp.1	0	ENSMUSG00000061974	Cldn24	claudin 24	uc012gdp.1;uc009lrk.1;uc009lrm.3;uc012gdo.1;uc009lrf.2;uc009lrh.2;uc009lri.2;uc012gdq.1	100039801;105243184;52357;69260;69260;70925;70925;75677	0;0;0;0;0;0;0;0
chr18	10438610	10476014	37405	*	9.28	9.51	9.01	0.5	6.83e-08	1.41e-06	755.19	702.63	519	510.98	5' UTR	18	10325179	10502410	177232	1	381157	uc008eas.1	113431	ENSMUSG00000042942	Greb1l	growth regulation by estrogen in breast cancer-like	uc008eas.1;uc008eat.1	381157;381157	0;0
chr10	87480192	87508722	28531	*	9.03	9.28	8.73	0.55	6.85e-08	1.41e-06	627.74	611.3	445	404.15	Promoter (<=1kb)	10	87491041	87493660	2620	2	17172	uc007gqs.1	0	ENSMUSG00000020052	Ascl1	achaete-scute family bHLH transcription factor 1	uc007gqs.1	17172	0
chr2	172533306	172553710	20405	*	8.47	8.76	8.11	0.65	6.86e-08	1.41e-06	430.35	438.99	273	279.53	Promoter (<=1kb)	2	172549593	172558622	9030	1	21420	uc008ocz.3	0	ENSMUSG00000028640	Tfap2c	transcription factor AP-2, gamma	uc008ocz.3;uc008oda.3	21420;21420	0;0
chr6	23241703	23287950	46248	*	9.73	9.94	9.49	0.45	6.97e-08	1.43e-06	1019.6	949.22	761	678.34	Promoter (<=1kb)	6	23245047	23248264	3218	2	73191	uc009bbd.2	0	ENSMUSG00000029697	Fezf1	Fez family zinc finger 1	uc009bbg.3;uc033ioh.2;uc033ioi.2;uc057lpd.1;uc012ein.1;uc009bbd.2	320405;320405;320405;320405;320405;73191	0;0;0;0;0;0
chr8	111804932	112239356	434425	*	12.96	13.04	12.87	0.17	7.05e-08	1.45e-06	8340.57	8502.81	7305	7651.35	Promoter (<=1kb)	8	111912018	111933791	21774	2	234740	uc009nna.1	0	ENSMUSG00000031951	Tmem231	transmembrane protein 231	uc009nna.1;uc012gky.1;uc009nmx.1;uc009nnc.1;uc009nnd.1;uc012gkz.1;uc009nmz.1;uc012gla.1;uc009nmy.1;uc009nne.3;uc009nnf.3;uc009nng.3;uc009nnb.2	234740;234740;23837;30947;30947;30947;56773;57321;66817;85305;85305;85305;93739	0;0;0;0;0;0;0;0;0;0;0;0;0
chr9	32525854	32552830	26977	*	8.77	9.04	8.44	0.6	7.12e-08	1.46e-06	520.15	529.1	332	362.32	Promoter (<=1kb)	9	32422204	32541452	119249	2	14247	uc009orz.2	0	ENSMUSG00000016087	Fli1	Friend leukemia integration 1	uc009orz.2	14247	0
chr10	80340646	80357797	17152	*	8.19	8.51	7.79	0.72	7.18e-08	1.47e-06	354.63	375.06	223	218.99	Promoter (<=1kb)	10	80356459	80365489	9031	1	216166	uc007gcx.2	0	ENSMUSG00000035486	Plk5	polo like kinase 5	uc007gcx.2;uc007gcy.2;uc007gcv.3;uc033frc.1;uc007gct.2;uc007gcu.2	216166;216166;66548;66548;70335;70335	0;0;0;0;10501;10501
chr11	102598287	102608224	9938	*	7.26	7.69	6.65	1.03	7.26e-08	1.48e-06	213.52	198.49	115	86.35	Promoter (<=1kb)	11	102604431	102608058	3628	1	57265	uc011yft.1	0	ENSMUSG00000050288	Fzd2	frizzled class receptor 2	uc011yft.1	57265	0
chr18	54980459	54994056	13598	*	7.67	8.05	7.16	0.88	7.32e-08	1.49e-06	281.8	246.59	134	152.23	Promoter (<=1kb)	18	54888045	54990180	102136	2	269023	uc008eyc.2	0	ENSMUSG00000052713	Zfp608	zinc finger protein 608	uc008eyc.2;uc008eyd.2;uc008eyg.1	269023;269023;269023	0;0;0
chr11	115248596	115268262	19667	*	8.39	8.69	8.01	0.68	7.38e-08	1.5e-06	405.94	418.29	268	247.48	Promoter (<=1kb)	11	115249169	115266313	17145	2	14813	uc011yhk.1	0	ENSMUSG00000020734	Grin2c	glutamate receptor, ionotropic, NMDA2C (epsilon 3)	uc007mgy.1;uc011yhk.1;uc007mgx.1;uc007mgu.2;uc007mgv.2;uc007mgw.2;uc011yhj.1	14149;14813;14813;320534;320534;320534;320534	0;0;0;61109;61109;61109;61109
chr15	82206144	82216790	10647	*	7.47	7.86	6.94	0.92	7.46e-08	1.52e-06	229.25	234.41	119	126.41	Promoter (<=1kb)	15	82206952	82212815	5864	2	435145	uc029sua.1	0	ENSMUSG00000096883	Shisa8	shisa family member 8	uc011zwr.1;uc007wyi.1;uc029sua.1;uc007wyj.1;uc007wyk.1;uc007wyl.1	20788;20788;435145;72049;72049;72049	58875;58875;0;7546;7546;7549
chr4	11379499	11398553	19055	*	8.62	8.9	8.27	0.62	7.48e-08	1.52e-06	491.6	461.52	303	315.13	Promoter (<=1kb)	4	11331933	11384462	52530	2	207920	uc008rzl.3	0	ENSMUSG00000040728	Esrp1	epithelial splicing regulatory protein 1	uc008rzl.3;uc008rzk.4;uc008rzm.3;uc012dao.2;uc008rzn.1	207920;207920;207920;207920;207920	0;0;0;0;0
chr12	111413784	111431593	17810	*	8.31	8.61	7.92	0.7	7.52e-08	1.53e-06	380.28	403.07	244	239.47	Promoter (<=1kb)	12	111417430	111424875	7446	1	74190	uc007pcw.2	0	ENSMUSG00000021280	Exoc3l4	exocyst complex component 3-like 4	uc007pcu.1;uc007pcw.2;uc007pcx.3;uc033gfj.1;uc007pcv.2;uc033gfk.1;uc011yuw.2	380787;74190;74190;74190;74190;74190;74190	6975;0;0;0;0;0;0
chr8	51585598	51710980	125383	*	11.31	11.17	11.44	-0.27	7.78e-08	1.58e-06	2335.49	2261.94	2864	2675.97	Distal Intergenic	8	52356611	52403339	46729	1	330767	uc009lry.1	-645631	ENSMUSG00000110013	1190028D05Rik	RIKEN cDNA 1190028D05 gene	NA	NA	NA
chr2	162651287	162674131	22845	*	8.4	8.7	8.02	0.68	7.79e-08	1.58e-06	423.73	406.72	246	272.4	Promoter (<=1kb)	2	161521988	162661147	1139160	2	19281	uc008nrw.2	0	ENSMUSG00000053141	Ptprt	protein tyrosine phosphatase, receptor type, T	uc008nrw.2;uc008nrx.2;uc008nry.2;uc008nrz.2;uc008nsb.1;uc012cio.1	19281;19281;19281;19281;77288;77288	0;0;0;0;0;0
chr10	63088775	63103767	14993	*	7.98	8.32	7.54	0.78	7.93e-08	1.6e-06	326.07	311.13	177	194.96	Promoter (<=1kb)	10	63100156	63100605	450	1	53404	uc007fjv.1	0	ENSMUSG00000036816	Atoh7	atonal bHLH transcription factor 7	uc007fjv.1	53404	0
chr9	54689309	54705175	15867	*	8.1	8.43	7.69	0.74	7.98e-08	1.61e-06	353.8	334.88	212	200.3	Promoter (<=1kb)	9	54698947	54716317	17371	1	58233	uc009prk.3	0	ENSMUSG00000032285	Dnaja4	DnaJ heat shock protein family (Hsp40) member A4	uc033jkq.1;uc009prk.3;uc009prl.2	100885845;58233;58233	-3138;0;0
chr2	103965351	103977299	11949	*	7.72	8.09	7.23	0.85	7.98e-08	1.61e-06	279.73	263.64	163	137.98	Promoter (<=1kb)	2	103969557	103981878	12322	1	16909	uc012cak.1	0	ENSMUSG00000032698	Lmo2	LIM domain only 2	uc012caj.1;uc012cak.1;uc008ljf.2;uc012cal.1	16909;16909;16909;16909	0;0;0;0
chr2	30722985	30728753	5769	*	6.49	7.01	5.67	1.33	8e-08	1.61e-06	136.55	121.16	55	47.18	Promoter (1-2kb)	2	30721210	30721293	84	1	100526499	uc012btn.1	1775	ENSMUSG00000093091	Mir3089	microRNA 3089	uc012btn.1	100526499	1775
chr7	16944853	16949818	4966	*	6.57	7.07	5.79	1.28	8.11e-08	1.63e-06	136.14	133.34	54	56.97	Promoter (<=1kb)	7	16944682	16948828	4147	1	434128	uc009fio.2	171	ENSMUSG00000070802	Pnmal2	PNMA-like 2	uc009fio.2	434128	0
chr7	101814087	101821548	7462	*	7.42	7.81	6.88	0.93	8.34e-08	1.67e-06	221.38	227.11	119	116.62	Promoter (<=1kb)	7	101818313	101822726	4414	1	11859	uc009ipe.2	0	ENSMUSG00000007946	Phox2a	paired-like homeobox 2a	uc009ipe.2;uc009ipf.2;uc009ipg.2;uc009iph.2;uc009ipi.1	11859;16332;16332;16332;16332	0;7744;16276;16678;16236
chr8	119818576	119889029	70454	*	10.28	10.44	10.09	0.35	8.46e-08	1.69e-06	1390.37	1393.09	1103	1081.6	Promoter (<=1kb)	8	119862305	119870716	8412	1	234796	uc009nql.1	0	ENSMUSG00000031828	Klhl36	kelch-like 36	uc009nql.1;uc009nqm.1;uc012glt.1	234796;234796;72042	0;0;0
chr10	67529035	67546136	17102	*	8.14	8.46	7.73	0.73	8.51e-08	1.7e-06	344.28	358.62	213	210.98	Promoter (<=1kb)	10	67537869	67542188	4320	1	13654	uc007flx.1	0	ENSMUSG00000037868	Egr2	early growth response 2	uc007flx.1;uc007fly.2;uc007flz.2	13654;13654;211488	0;0;0
chr1	146516801	146568189	51389	*	9.62	9.37	9.83	-0.46	8.67e-08	1.73e-06	660.43	665.49	963	855.49	5' UTR	1	146495666	146902472	406807	1	215378	uc007cxo.2	21135	ENSMUSG00000035131	Brinp3	bone morphogenetic protein/retinoic acid inducible neural specific 3	uc007cxo.2;uc007cxp.2;uc007cxq.2;uc007cxr.1	215378;215378;215378;215378	0;0;0;0
chr14	122251089	122289871	38783	*	9.22	9.46	8.93	0.53	8.73e-08	1.74e-06	748.57	659.4	486	489.62	Intron (uc007vax.2/69634, intron 1 of 7)	14	122181694	122402234	220541	1	69634	uc007vax.2	69395	ENSMUSG00000025545	Clybl	citrate lyase beta like	uc007vax.2	69634	0
chr8	71550842	71616939	66098	*	10.14	10.33	9.92	0.41	8.77e-08	1.74e-06	1266.64	1307.24	899	1038.87	Promoter (<=1kb)	8	71597646	71608149	10504	1	100037278	uc012gfv.1	0	ENSMUSG00000043243	Fam129c	family with sequence similarity 129, member C	uc012gfv.1;uc009med.2;uc012gfu.1;uc029wtt.1;uc009mee.2;uc009mef.1;uc009mdw.1;uc009mdx.1;uc009mdy.1;uc009mdz.1;uc009mea.1;uc012gft.1;uc009meb.1;uc057amb.1;uc009mec.1;uc009mdt.1	100037278;100037278;234404;234407;234407;234407;26457;26457;26457;26457;26457;434325;66171;66171;66171;73711	0;0;0;0;0;-246;0;0;0;0;0;0;0;0;0;0
chr17	26407869	26417078	9210	*	7.1	7.54	6.46	1.08	8.85e-08	1.76e-06	173.38	199.1	83	93.47	Promoter (<=1kb)	17	26414965	26446349	31385	1	240055	uc008bed.3	0	ENSMUSG00000034413	Neurl1b	neuralized E3 ubiquitin protein ligase 1B	uc008bed.3	240055	0
chr2	17977706	17991549	13844	*	7.81	8.16	7.34	0.82	8.94e-08	1.77e-06	298.35	273.99	172	151.34	Distal Intergenic	2	17996417	17996958	542	2	68231	uc008ili.2	5409	ENSMUSG00000062651	H2al2a	H2A histone family member L2A	uc008ili.2	68231	5409
chr5	33718272	33727898	9627	*	7.46	7.86	6.92	0.94	9.31e-08	1.84e-06	217.66	246.59	129	113.06	Promoter (<=1kb)	5	33721724	33737068	15345	1	14184	uc008xbe.3	0	ENSMUSG00000054252	Fgfr3	fibroblast growth factor receptor 3	uc008xbe.3;uc008xbf.3;uc008xbg.3;uc008xbh.3;uc012dut.2	14184;14184;14184;14184;14184	0;0;0;0;0
chr9	65157080	65169368	12289	*	7.65	8.01	7.16	0.85	9.47e-08	1.87e-06	265.25	251.46	140	145.99	Intron (uc009qcv.2/19289, intron 2 of 13)	9	65141189	65185872	44684	1	19289	uc009qcv.2	15891	ENSMUSG00000032394	Igdcc3	immunoglobulin superfamily, DCC subclass, member 3	uc009qcv.2;uc009qcw.2	19289;19289	0;0
chr1	6421538	6455959	34422	*	8.97	9.21	8.67	0.55	9.48e-08	1.87e-06	610.36	576.6	414	398.81	Distal Intergenic	1	6487231	6860940	373710	1	240690	uc007afw.1	-31272	ENSMUSG00000033740	St18	suppression of tumorigenicity 18	NA	NA	NA
chr8	110042395	110645096	602702	*	13.46	13.54	13.37	0.16	9.61e-08	1.89e-06	11808.6	11963.6	10328	10881	Promoter (<=1kb)	8	110495366	110502356	6991	2	100861869	uc009nkt.1	0	NA	Gm21283	predicted gene, 21283	uc009nkt.1;uc009nkn.1;uc009nko.1;uc009njv.2;uc009njw.2;uc009nkp.2;uc009nku.1;uc009nkv.2;uc012gkn.2;uc009nkq.1;uc009nkr.1;uc009nks.1;uc009njt.2;uc057ana.1	100861869;12308;12308;234725;234725;234728;234729;234729;234729;244653;244653;244653;26887;77171	0;0;0;0;0;0;0;0;0;0;0;0;0;0
chr9	58819432	58833904	14473	*	7.76	8.11	7.29	0.83	1.03e-07	2.04e-06	290.07	264.25	162	150.45	Promoter (<=1kb)	9	58823512	58860955	37444	1	330953	uc009pxi.1	0	ENSMUSG00000032338	Hcn4	hyperpolarization-activated, cyclic nucleotide-gated K+ 4	uc009pxi.1	330953	0
chr4	151993272	152008319	15048	*	7.71	8.06	7.23	0.83	1.06e-07	2.09e-06	266.9	268.51	147	154.01	Promoter (<=1kb)	4	151989631	151996179	6549	2	230936	uc008vyx.2	0	ENSMUSG00000047777	Phf13	PHD finger protein 13	uc008vyx.2;uc008vyy.1;uc008vyu.2;uc008vyv.2	230936;242785;69876;69876	0;-572;-4286;-4286
chr19	19979602	20042703	63102	*	9.82	9.6	10.01	-0.41	1.11e-07	2.19e-06	787.05	764.13	1067	995.25	Exon (uc008gyh.1/uc008gyh.1, exon 1 of 2)	19	20373434	20390671	17238	2	16952	uc008gyi.1	347968	ENSMUSG00000024659	Anxa1	annexin A1	NA	NA	NA
chr11	11110922	11122852	11931	*	7.97	8.31	7.52	0.78	1.13e-07	2.22e-06	324.83	308.09	169	198.52	Promoter (<=1kb)	11	11114016	11263526	149511	1	319922	uc007iac.1	0	ENSMUSG00000050830	Vwc2	von Willebrand factor C domain containing 2	uc007iac.1;uc007iad.2	319922;319922	0;0
chr3	17779019	17818340	39322	*	9.59	9.79	9.35	0.44	1.16e-07	2.27e-06	887.19	885.9	679	624.93	Promoter (<=1kb)	3	17789921	17800071	10151	1	70441	uc008orj.2	0	ENSMUSG00000100252	Mir124-2hg	Mir124-2 host gene (non-protein coding)	uc008orj.2;uc057lfm.1;uc012cnp.1	70441;70441;723950	0;0;0
chr15	5234653	5266765	32113	*	9.11	9.34	8.83	0.52	1.18e-07	2.31e-06	637.67	661.84	445	462.91	Promoter (<=1kb)	15	5233399	5244187	10789	2	19219	uc007vcy.3	0	ENSMUSG00000039942	Ptger4	prostaglandin E receptor 4 (subtype EP4)	uc007vcy.3;uc007vcz.3	19219;19219	0;0
chr11	95117325	95124606	7282	*	7.24	7.65	6.66	0.99	1.19e-07	2.33e-06	196.97	205.19	97	105.93	Promoter (<=1kb)	11	95120117	95125293	5177	1	13393	uc007kzy.3	0	ENSMUSG00000001510	Dlx3	distal-less homeobox 3	uc007kzy.3	13393	0
chr4	148802566	148810094	7529	*	6.95	7.4	6.3	1.1	1.26e-07	2.45e-06	164.69	172.92	76	81.9	Promoter (<=1kb)	4	148804392	148891936	87545	1	69743	uc008vvk.1	0	ENSMUSG00000028977	Casz1	castor zinc finger 1	uc008vvk.1;uc008vvl.1;uc008vvn.2	69743;69743;69743	0;0;0
chr8	76467399	77136577	669179	*	13.69	13.62	13.76	-0.14	1.27e-07	2.47e-06	12603.5	12548.7	13840	13891.7	Promoter (<=1kb)	8	76749087	76900173	151087	2	102640923	uc009mhk.2	0	ENSMUSG00000074235	Gm10649	predicted gene 10649	uc009mhk.2;uc009mhl.1	102640923;110784	0;0
chr13	62133537	62149378	15842	*	7.7	8.07	7.19	0.88	1.28e-07	2.49e-06	294.21	242.94	154	138.87	Intron (uc029sbp.1/630579, intron 2 of 2)	13	61804312	62173936	369625	1	630579	uc029sbp.1	329225	ENSMUSG00000074867	Zfp808	zinc finger protein 808	uc029sbp.1;uc029sbq.1;uc007qws.1;uc007qwt.1	630579;630579;630579;630579	0;0;0;0
chr16	21682970	21709878	26909	*	8.76	9.03	8.44	0.59	1.33e-07	2.58e-06	518.08	525.45	326	366.77	Promoter (<=1kb)	16	21649045	21694665	45621	2	72190	uc007yrl.2	0	ENSMUSG00000043391	2510009E07Rik	RIKEN cDNA 2510009E07 gene	uc007yrl.2	72190	0
chr2	181130543	181163855	33313	*	8.94	9.19	8.64	0.54	1.35e-07	2.61e-06	578.08	587.56	391	409.5	Promoter (<=1kb)	2	181147692	181157015	9324	2	13628	uc008olh.1	0	ENSMUSG00000016349	Eef1a2	eukaryotic translation elongation factor 1 alpha 2	uc008olh.1;uc008okr.2;uc008oks.2;uc008okt.2;uc008oku.2;uc008okv.2;uc008oky.2;uc008okz.2;uc008olb.2;uc008olc.2;uc008old.2;uc008olf.2;uc008olg.2	13628;16536;16536;16536;16536;16536;16536;16536;16536;16536;16536;16536;16536	0;0;0;0;0;0;0;0;0;0;0;0;0
chr9	21979767	21991509	11743	*	7.54	7.91	7.04	0.87	1.35e-07	2.61e-06	240.83	240.5	134	129.08	Promoter (<=1kb)	9	21971004	21989453	18450	2	71746	uc009onf.1	0	ENSMUSG00000040146	Rgl3	ral guanine nucleotide dissociation stimulator-like 3	uc009onf.1;uc009ong.2;uc012gpk.1	71746;77609;77609	0;0;0
chr4	129133931	129140272	6342	*	6.54	7.04	5.77	1.27	1.36e-07	2.63e-06	128.69	135.17	56	53.41	Promoter (<=1kb)	4	129137060	129144593	7534	1	384061	uc008uwe.1	0	ENSMUSG00000001334	Fndc5	fibronectin type III domain containing 5	uc008uwe.1	384061	0
chr10	60162890	60192895	30006	*	8.75	9.02	8.4	0.63	1.36e-07	2.63e-06	513.94	527.89	303	372.11	Promoter (<=1kb)	10	60181527	60188707	7181	2	53374	uc007fem.3	0	ENSMUSG00000057337	Chst3	carbohydrate sulfotransferase 3	uc007fem.3;uc011xeg.2	53374;53374	0;0
chr7	28286614	28302646	16033	*	8.09	8.41	7.67	0.74	1.41e-07	2.72e-06	334.35	346.44	194	214.54	Promoter (<=1kb)	7	28293555	28301785	8231	2	13389	uc009fye.1	0	ENSMUSG00000003436	Dll3	delta like canonical Notch ligand 3	uc009fye.1;uc009fyd.1;uc009fyg.1	13389;280621;66525	0;0;9400
chr16	21240091	21253176	13086	*	7.71	8.07	7.22	0.84	1.43e-07	2.74e-06	267.73	269.12	136	162.91	Exon (uc007yri.1/328646, exon 5 of 5)	16	21247499	21296872	49374	2	328646	uc007yri.1	43696	ENSMUSG00000096918	Gm16863	predicted gene, 16863	uc033gyl.1;uc007yri.1	102465781;328646	2890;0
chr4	148265092	148278725	13634	*	7.72	8.08	7.24	0.83	1.43e-07	2.74e-06	286.35	253.9	149	154.01	5' UTR	4	148236857	148287965	51109	2	242748	uc008vum.1	9240	ENSMUSG00000041544	Disp3	dispatched RND transporter family member 3	uc008vum.1;uc008vun.1;uc008vuo.1	242748;242748;242748	0;0;0
chr4	126728326	126741191	12866	*	7.96	8.29	7.53	0.77	1.44e-07	2.76e-06	306.21	321.48	177	192.29	Promoter (<=1kb)	4	126716003	126736269	20267	2	332937	uc008uts.1	0	ENSMUSG00000042477	Tfap2e	transcription factor AP-2, epsilon	uc008utu.2;uc008utt.2;uc008uts.1	26562;26562;332937	12236;12238;0
chr8	32198754	32575311	376558	*	12.91	12.83	12.99	-0.16	1.47e-07	2.81e-06	7279.17	7296.04	8210	8026.13	Distal Intergenic	8	32151895	32181847	29953	1	666589	uc009lju.1	46859	NA	Gm8179	predicted gene 8179	NA	NA	NA
chr11	120294991	120320329	25339	*	8.62	8.9	8.28	0.61	1.51e-07	2.88e-06	480.42	471.87	298	325.82	Distal Intergenic	11	120274419	120292297	17879	1	268515	uc007msf.2	20572	ENSMUSG00000039741	Bahcc1	BAH domain and coiled-coil containing 1	uc007msd.2;uc011yiy.1;uc007mse.2;uc057knf.1;uc007msf.2	268515;268515;268515;268515;268515	62044;62044;58292;58131;20572
chr1	178259114	178287469	28356	*	8.84	9.09	8.54	0.56	1.51e-07	2.88e-06	549.94	540.67	369	373	Distal Intergenic	1	178319153	178322693	3541	1	66359	uc007duz.1	-31684	ENSMUSG00000026500	Cox20	cytochrome c oxidase assembly protein 20	NA	NA	NA
chr5	38154151	38163453	9303	*	7.41	7.81	6.85	0.96	1.52e-07	2.9e-06	210.62	239.28	129	102.37	Promoter (<=1kb)	5	38137193	38159467	22275	2	18196	uc008xga.1	0	ENSMUSG00000029126	Nsg1	neuron specific gene family member 1	uc008xga.1	18196	0
chr13	62536812	62556294	19483	*	8.17	8.49	7.76	0.73	1.54e-07	2.93e-06	369.94	347.66	235	197.63	Promoter (2-3kb)	13	62453016	62558599	105584	2	71508	uc007qwx.4	2305	ENSMUSG00000113450	Zfp935	zinc finger protein 935	uc007qwx.4;uc007qwy.2;uc007qwz.2;uc007qxa.2	71508;77117;77117;77117	0;0;0;0
chr8	49989171	50096643	107473	*	11.17	11.01	11.31	-0.29	1.55e-07	2.95e-06	2079.35	2057.36	2673	2392.88	Distal Intergenic	8	50368112	50416089	47978	1	100039954	uc029wsx.1	-271469	ENSMUSG00000110281	Gm2516	predicted gene 2516	NA	NA	NA
chr1	19075916	19115935	40020	*	9.33	9.55	9.07	0.48	1.58e-07	3e-06	725.81	770.22	528	543.92	Promoter (<=1kb)	1	19103022	19166338	63317	1	226896	uc007akp.2	0	ENSMUSG00000042596	Tfap2d	transcription factor AP-2, delta	uc007akp.2	226896	0
chr14	97784314	98012572	228259	*	11.95	11.76	12.12	-0.36	1.6e-07	3.04e-06	3490	3458.36	4677	4227.6	3' UTR	14	97786846	98169765	382920	2	13134	uc007uur.2	157193	ENSMUSG00000055639	Dach1	dachshund family transcription factor 1	uc007uur.2;uc007uus.2;uc007uut.2	13134;13134;13134	0;0;0
chr5	28102358	28135953	33596	*	8.93	9.18	8.63	0.55	1.63e-07	3.08e-06	574.36	588.77	378	416.62	Distal Intergenic	5	28165696	28172166	6471	1	13799	uc008wtv.1	-29743	ENSMUSG00000039095	En2	engrailed 2	NA	NA	NA
chr15	73837991	73842499	4509	*	6.27	6.81	5.38	1.44	1.63e-07	3.08e-06	110.9	113.86	35	48.07	Promoter (<=1kb)	15	73786936	73839671	52736	2	268816	uc007wcm.1	0	ENSMUSG00000072487	Mroh5	maestro heat-like repeat family member 5	uc007wcm.1;uc007wcn.1	268816;268816	0;0
chr7	131994656	132023309	28654	*	8.52	8.8	8.18	0.62	1.68e-07	3.17e-06	442.35	449.95	288	291.99	Distal Intergenic	7	131966460	131985633	19174	1	233919	uc009kbs.1	28196	ENSMUSG00000040125	Gpr26	G protein-coupled receptor 26	NA	NA	NA
chr1	12586016	12612598	26583	*	8.79	9.05	8.48	0.57	1.72e-07	3.25e-06	516.01	543.72	361	353.41	Distal Intergenic	1	12667563	12673090	5528	1	329096	uc029qmx.1	-54965	ENSMUSG00000097171	Gm17644	predicted gene, 17644	NA	NA	NA
chr6	121411503	121421622	10120	*	7.62	7.98	7.13	0.84	1.77e-07	3.32e-06	252.42	250.85	144	137.09	5' UTR	6	121372927	121473678	100752	2	243621	uc009dom.3	52056	ENSMUSG00000040797	Iqsec3	IQ motif and Sec7 domain 3	uc009dom.3;uc009don.3;uc009doo.3;uc009dop.1	243621;243621;243621;243621	0;0;0;0
chr19	30015834	30045242	29409	*	8.91	9.16	8.62	0.54	1.78e-07	3.34e-06	569.39	572.33	403	381.9	Promoter (<=1kb)	19	30030513	30057396	26884	1	109113	uc008hef.1	0	ENSMUSG00000024817	Uhrf2	ubiquitin-like, containing PHD and RING finger domains 2	uc008hef.1;uc008heg.1;uc008heh.1;uc008hei.2	109113;109113;109113;109113	0;0;0;0
chr8	94688631	94794598	105968	*	10.98	11.11	10.83	0.28	1.79e-07	3.37e-06	2229.56	2204.1	1756	1884.57	Promoter (<=1kb)	8	94745684	94751388	5705	1	20299	uc009mww.1	0	ENSMUSG00000031779	Ccl22	chemokine (C-C motif) ligand 22	uc009mww.1;uc009mwx.2;uc009mwv.1	20299;20312;67801	0;0;0
chr8	103083712	103325239	241528	*	12.22	12.13	12.31	-0.18	1.8e-07	3.38e-06	4419.39	4519.61	5144	5010.1	Distal Intergenic	8	103343878	103347534	3657	2	69794	uc033jhc.1	22295	ENSMUSG00000110340	1600027J07Rik	RIKEN cDNA 1600027J07 gene	NA	NA	NA
chr14	116913051	116937547	24497	*	8.62	8.89	8.29	0.6	1.84e-07	3.44e-06	491.6	459.69	315	311.57	Promoter (<=1kb)	14	116925297	117627198	701902	1	23888	uc007uyj.2	0	ENSMUSG00000058571	Gpc6	glypican 6	uc007uyj.2;uc007uyk.2;uc007uyl.2	23888;23888;23888	0;0;0
chr6	99510831	99538140	27310	*	8.66	8.93	8.33	0.6	1.84e-07	3.45e-06	481.66	491.96	307	335.61	Promoter (<=1kb)	6	98925342	99520993	595652	2	108655	uc012epq.1	0	ENSMUSG00000030067	Foxp1	forkhead box P1	uc012epq.1	108655	0
chr8	78147569	78734222	586654	*	13.5	13.58	13.43	0.15	1.89e-07	3.53e-06	12028	12404.4	10961	11059.1	Promoter (<=1kb)	8	78433009	78436652	3644	2	18997	uc009mhy.1	0	ENSMUSG00000031688	Pou4f2	POU domain, class 4, transcription factor 2	uc009mhy.1;uc009mhz.1;uc009mia.2;uc009mhx.1;uc012ggh.2;uc009mib.2;uc009mid.2;uc012ggi.2;uc012ggj.2;uc012ggk.2	18997;19656;19656;73301;76775;76775;76775;76775;76775;76775	0;0;0;0;0;0;0;0;0;0
chr8	30300407	30398083	97677	*	10.98	10.84	11.11	-0.27	1.94e-07	3.61e-06	1843.07	1833.9	2210	2214.84	Distal Intergenic	8	30568395	30575573	7179	1	71314	uc029wsd.1	-170312	ENSMUSG00000097044	4933433F19Rik	RIKEN cDNA 4933433F19 gene	NA	NA	NA
chr2	170485004	170505767	20764	*	8.41	8.69	8.05	0.65	1.99e-07	3.7e-06	423.73	404.29	260	268.84	Promoter (<=1kb)	2	170496428	170519070	22643	1	109054	uc008occ.2	0	ENSMUSG00000052033	Pfdn4	prefoldin 4	uc029uik.1;uc008occ.2;uc008ocb.2	100502946;109054;13081	0;0;0
chr4	124647742	124664945	17204	*	8.1	8.42	7.7	0.72	1.99e-07	3.7e-06	333.52	350.71	217	197.63	Promoter (<=1kb)	4	124657646	124660655	3010	1	18991	uc029uzh.1	0	ENSMUSG00000090125	Pou3f1	POU domain, class 3, transcription factor 1	uc029uzh.1	18991	0
chr7	118109202	118117482	8281	*	7.04	7.47	6.42	1.05	2e-07	3.71e-06	187.04	167.44	88	83.68	Promoter (<=1kb)	7	118104374	118116147	11774	2	267019	uc009jjn.2	0	ENSMUSG00000008683	Rps15a	ribosomal protein S15A	uc009jjn.2;uc009jjo.2	267019;54208	0;12143
chr16	74813245	74856559	43315	*	9.43	9.19	9.64	-0.44	2.05e-07	3.8e-06	580.98	590.6	812	782.49	Distal Intergenic	16	74349795	74410912	61118	2	268902	uc007zrl.1	-402333	ENSMUSG00000052516	Robo2	roundabout guidance receptor 2	NA	NA	NA
chr5	36866415	36874277	7863	*	7.25	7.65	6.7	0.96	2.08e-07	3.84e-06	198.21	204.58	107	100.59	Promoter (<=1kb)	5	36868570	36955078	86509	1	269643	uc008xfe.1	0	ENSMUSG00000029120	Ppp2r2c	protein phosphatase 2, regulatory subunit B, gamma	uc008xfe.1;uc029vhf.1	269643;71054	0;0
chr1	191176570	191192804	16235	*	8.19	8.49	7.8	0.69	2.08e-07	3.85e-06	357.94	363.49	218	227.89	Promoter (<=1kb)	1	191170296	191183333	13038	2	11910	uc007ece.2	0	ENSMUSG00000026628	Atf3	activating transcription factor 3	uc007ece.2;uc011wys.2;uc011wyt.2	11910;11910;11910	0;0;0
chr6	85498637	85516853	18217	*	8.1	8.42	7.69	0.72	2.11e-07	3.9e-06	335.18	347.66	199	215.43	Promoter (<=1kb)	6	85511122	85513542	2421	2	13656	uc009cpy.1	0	ENSMUSG00000071341	Egr4	early growth response 4	uc009cpy.1;uc009cpw.3;uc009cpx.3;uc033isv.2	13656;330369;330369;330369	0;0;0;0
chr1	75446798	75452801	6004	*	6.53	7.02	5.76	1.26	2.12e-07	3.91e-06	126.62	133.34	57	51.63	Promoter (<=1kb)	1	75450510	75474340	23831	1	241118	uc007bpg.1	0	ENSMUSG00000033007	Asic4	acid-sensing (proton-gated) ion channel family member 4	uc007bpg.1;uc007bpd.1;uc007bpe.1;uc007bpf.1	241118;69080;69080;69080	0;10855;10651;10651
chr7	31041649	31054487	12839	*	7.74	8.09	7.28	0.81	2.14e-07	3.94e-06	277.66	266.07	146	163.8	Promoter (<=1kb)	7	31032723	31041839	9117	2	18301	uc009ghp.3	0	ENSMUSG00000009687	Fxyd5	FXYD domain-containing ion transport regulator 5	uc033iym.1;uc009ghp.3;uc009ghq.3;uc033iyk.1;uc033iyl.1;uc009gho.3;uc009ght.2;uc009ghu.2;uc009ghv.2;uc009ghw.2;uc009ghx.2;uc009ghy.2;uc009ghr.1;uc009ghs.1	102465635;18301;18301;18301;18301;18301;56188;56188;56188;56188;56188;56188;57780;57780	-1332;0;0;0;0;0;0;0;0;0;0;0;0;0
chr1	182161140	182236876	75737	*	10.1	10.27	9.91	0.36	2.24e-07	4.11e-06	1261.26	1215.91	982	945.4	Distal Intergenic	1	182157178	182158098	921	2	625823	uc011wxu.1	-3042	ENSMUSG00000091013	Vmn1r1	vomeronasal 1 receptor 1	uc011wxu.1	625823	-3042
chr14	107632279	107738223	105945	*	10.69	10.53	10.83	-0.3	2.34e-07	4.29e-06	1452.03	1508.16	1858	1785.76	Distal Intergenic	14	106417187	106486520	69334	2	73631	uc007uyb.3	-1145759	ENSMUSG00000099794	1700128A07Rik	RIKEN cDNA 1700128A07 gene	NA	NA	NA
chr8	95914334	96059134	144801	*	11.47	11.58	11.35	0.23	2.35e-07	4.3e-06	3045.57	3058.94	2599	2612.76	Exon (uc029wvb.1/uc029wvb.1, exon 1 of 1)	8	95864137	95888365	24229	2	14719	uc009mzi.1	-25969	ENSMUSG00000031672	Got2	glutamatic-oxaloacetic transaminase 2, mitochondrial	NA	NA	NA
chr5	147719518	147738056	18539	*	8.34	8.64	7.97	0.67	2.5e-07	4.56e-06	408.42	389.67	236	266.17	Promoter (<=1kb)	5	147562196	147725988	163793	2	14254	uc009aoh.1	0	ENSMUSG00000029648	Flt1	FMS-like tyrosine kinase 1	uc009aoh.1;uc009aoi.2	14254;14254	0;0
chr12	83995248	84014370	19123	*	8.24	8.53	7.86	0.68	2.67e-07	4.87e-06	381.94	359.84	233	230.56	Promoter (<=1kb)	12	84009502	84017670	8169	1	26897	uc007oeb.2	0	ENSMUSG00000072949	Acot1	acyl-CoA thioesterase 1	uc011yor.2;uc007oeb.2	171210;26897	7387;0
chr19	6827071	6849792	22722	*	8.43	8.71	8.07	0.64	2.67e-07	4.87e-06	435.73	403.68	273	266.17	Promoter (<=1kb)	19	6829886	6829944	59	2	100628576	uc029tqw.1	0	ENSMUSG00000104884	Mir5046	microRNA 5046	uc029tqw.1;uc057lad.1;uc008gjb.1	100628576;56613;78317	0;0;0
chr2	152621206	152637768	16563	*	8.1	8.41	7.71	0.71	2.69e-07	4.91e-06	339.32	342.18	205	212.76	Promoter (<=1kb)	2	152627008	152635191	8184	1	19700	uc008nfw.1	0	ENSMUSG00000000359	Rem1	rad and gem related GTP binding protein 1	uc008nfw.1;uc008nfv.1	19700;654459	0;0
chr7	99377539	99385651	8113	*	6.84	7.3	6.17	1.12	2.75e-07	4.99e-06	159.73	154.65	81	63.2	Promoter (<=1kb)	7	99381549	99460984	79436	1	233552	uc009ilo.1	0	ENSMUSG00000035314	Gdpd5	glycerophosphodiester phosphodiesterase domain containing 5	uc009ilo.1	233552	0
chr6	83756776	83763814	7039	*	7.14	7.55	6.55	1	2.76e-07	5.02e-06	199.87	175.35	98	89.02	Promoter (<=1kb)	6	83761759	83762508	750	2	67934	uc033isu.1	0	ENSMUSG00000099354	1700124L16Rik	RIKEN cDNA 1700124L16 gene	uc009coc.1;uc033isu.1;uc009cod.1	110935;67934;75305	0;0;0
chr13	83709783	83756492	46710	*	9.7	9.9	9.47	0.43	2.79e-07	5.07e-06	966.22	945.57	757	658.75	Promoter (<=1kb)	13	83721556	83741244	19689	1	320203	uc033gmo.1	0	ENSMUSG00000050334	C130071C03Rik	RIKEN cDNA C130071C03 gene	uc033gmo.1;uc033gmp.1;uc007ril.1;uc007rim.1;uc011zch.1	320203;320203;320203;320203;723967	0;0;0;0;0
chr5	67203674	67251106	47433	*	9.61	9.82	9.37	0.45	2.89e-07	5.23e-06	911.6	896.25	713	608.9	Distal Intergenic	5	67260565	67264609	4045	1	67878	uc008xpo.2	-9459	ENSMUSG00000037720	Tmem33	transmembrane protein 33	NA	NA	NA
chr4	143346949	143352912	5964	*	7.07	7.49	6.47	1.02	2.93e-07	5.29e-06	188.69	170.48	91	86.35	Promoter (<=1kb)	4	143349750	143371028	21279	1	242735	uc008vqb.2	0	ENSMUSG00000028584	Lrrc38	leucine rich repeat containing 38	uc008vqb.2	242735	0
chr2	163373434	163380239	6806	*	6.88	7.33	6.22	1.11	2.95e-07	5.32e-06	161.8	159.52	66	82.79	Exon (uc008nsp.2/59091, exon 2 of 6)	2	163336242	163397973	61732	2	59091	uc008nsp.2	17734	ENSMUSG00000017817	Jph2	junctophilin 2	uc008nsp.2;uc029uhy.1	59091;59091	0;0
chr7	121391804	121394705	2902	*	5.91	6.5	4.91	1.59	3.02e-07	5.45e-06	99.31	81.59	28	32.05	Promoter (<=1kb)	7	121391859	121398067	6209	1	195646	uc009jnq.1	0	ENSMUSG00000046321	Hs3st2	heparan sulfate (glucosamine) 3-O-sulfotransferase 2	uc009jnq.1;uc009jnr.1	195646;195646	0;0
chr2	19418370	19537016	118647	*	10.93	11.07	10.78	0.29	3.08e-07	5.56e-06	2223.77	2074.41	1724	1792.88	Promoter (<=1kb)	2	19441508	19446674	5167	2	102637107	uc008img.1	0	ENSMUSG00000085388	Ptf1aos	pancreas specific transcription factor 1a, opposite strand	uc008img.1;uc012brh.1;uc008imi.1;uc057lcc.1	102637107;19213;70909;70909	0;0;0;0
chr2	131558058	131569024	10967	*	7.51	7.88	7.02	0.86	3.12e-07	5.61e-06	245.8	224.67	128	130.86	Promoter (<=1kb)	2	131545357	131562285	16929	2	11550	uc008mlu.1	0	ENSMUSG00000027335	Adra1d	adrenergic receptor, alpha 1d	uc008mlu.1	11550	0
chr12	111438184	111450020	11837	*	7.73	8.07	7.27	0.8	3.13e-07	5.63e-06	274.35	263.64	147	162.02	Promoter (<=1kb)	12	111442661	111455018	12358	1	21928	uc007pcy.2	0	ENSMUSG00000021281	Tnfaip2	tumor necrosis factor, alpha-induced protein 2	uc007pcy.2;uc007pcz.2	21928;21928	0;0
chr8	119531152	119597276	66125	*	10.1	10.28	9.9	0.38	3.15e-07	5.64e-06	1205.4	1281.66	924	993.47	Promoter (<=1kb)	8	119508151	119558761	50611	2	56453	uc009nps.3	0	ENSMUSG00000031835	Mbtps1	membrane-bound transcription factor peptidase, site 1	uc009npx.1;uc009npy.1;uc009npz.1;uc009nps.3;uc009npt.3;uc012gls.2;uc009npw.1;uc009npu.2;uc009npv.2	21341;21341;21341;56453;56453;56453;68270;72552;72552	0;0;0;0;0;0;0;0;0
chr5	24522841	24530836	7996	*	7.3	7.69	6.77	0.93	3.16e-07	5.66e-06	211.45	202.75	105	113.06	Promoter (<=1kb)	5	24504426	24526848	22423	2	231044	uc008wrx.1	0	ENSMUSG00000067724	Gbx1	gastrulation brain homeobox 1	uc008wry.2;uc057btj.1;uc008wrx.1	117590;117590;231044	9621;10142;0
chr4	11169744	11209695	39952	*	9.34	9.55	9.09	0.46	3.2e-07	5.73e-06	739.46	761.08	551	541.25	Promoter (<=1kb)	4	11191351	11204779	13429	1	12448	uc008rzd.2	0	ENSMUSG00000028212	Ccne2	cyclin E2	uc008rzd.2;uc008rze.1;uc008rzf.1;uc008ryz.1;uc008rza.1;uc008rzb.1;uc008rzg.2;uc008rzh.2	12448;12448;12448;60599;60599;60599;72656;72656	0;0;0;13303;0;0;0;0
chr8	101064157	101207984	143828	*	11.52	11.4	11.63	-0.23	3.21e-07	5.74e-06	2699.22	2703.97	3246	3086.36	Distal Intergenic	8	102632095	102785111	153017	2	12552	uc009mzu.2	1577127	ENSMUSG00000031673	Cdh11	cadherin 11	NA	NA	NA
chr13	54748440	54770900	22461	*	8.36	8.65	8	0.65	3.32e-07	5.92e-06	406.35	394.55	247	264.39	Promoter (<=1kb)	13	54758860	54766440	7581	2	104069	uc007qpc.1	0	ENSMUSG00000034891	Sncb	synuclein, beta	uc007qpc.1;uc007qpa.2;uc007qpb.2	104069;26913;26913	0;0;0
chr16	91264256	91276183	11928	*	7.74	8.1	7.27	0.83	3.34e-07	5.95e-06	249.94	297.74	155	153.12	Promoter (<=1kb)	16	91269769	91271939	2171	1	50914	uc007zxf.1	0	ENSMUSG00000046160	Olig1	oligodendrocyte transcription factor 1	uc007zxf.1	50914	0
chr12	111270571	111281054	10484	*	7.76	8.11	7.32	0.79	3.35e-07	5.95e-06	268.14	283.12	152	166.47	Promoter (<=1kb)	12	111271096	111276426	5331	1	93835	uc007pcp.2	0	ENSMUSG00000021278	Amn	amnionless	uc007pcl.2;uc007pcn.2;uc007pco.2;uc007pcp.2;uc007pcq.1	22031;22031;22031;93835;93835	104201;104201;22088;0;0
chr17	35466203	35472619	6417	*	6.64	7.11	5.93	1.18	3.35e-07	5.95e-06	136.55	139.43	62	59.64	Promoter (<=1kb)	17	35470089	35474563	4475	1	15007	uc008cht.1	0	ENSMUSG00000067235	H2-Q10	histocompatibility 2, Q region locus 10	uc008cht.1	15007	0
chr11	63916269	63927585	11317	*	7.57	7.93	7.09	0.85	3.48e-07	6.18e-06	235.04	253.9	143	129.08	Promoter (<=1kb)	11	63884693	63922284	37592	2	54710	uc007jkn.1	0	ENSMUSG00000070407	Hs3st3b1	heparan sulfate (glucosamine) 3-O-sulfotransferase 3B1	uc007jkn.1	54710	0
chr15	75741118	75750030	8913	*	7.21	7.61	6.65	0.96	3.49e-07	6.18e-06	204	186.92	105	96.14	Promoter (<=1kb)	15	75746843	75747922	1080	2	378435	uc007whe.1	0	ENSMUSG00000047591	Mafa	v-maf musculoaponeurotic fibrosarcoma oncogene family, protein A (avian)	uc007whf.1;uc007whe.1	223642;378435	91878;0
chr8	40844673	40951430	106758	*	11.09	11.22	10.95	0.27	3.61e-07	6.38e-06	2334.66	2422.68	1928	2024.34	Promoter (<=1kb)	8	40862367	40922070	59704	1	11988	uc009lnf.1	0	ENSMUSG00000031596	Slc7a2	solute carrier family 7 (cationic amino acid transporter, y+ system), member 2	uc009lnf.1;uc009lng.1;uc009lnh.2;uc009lni.3	11988;11988;68797;68797	0;0;0;0
chr14	57698249	57703352	5104	*	6.53	7.02	5.78	1.25	3.61e-07	6.38e-06	120.83	139.43	57	52.52	5' UTR	14	57642029	57746123	104095	2	50523	uc007udj.1	42771	ENSMUSG00000021959	Lats2	large tumor suppressor 2	uc007udj.1;uc007udk.1;uc011zmg.1;uc007udl.1	50523;50523;50523;50523	0;0;0;0
chr7	19486454	19495905	9452	*	7.43	7.8	6.91	0.89	3.68e-07	6.5e-06	228.83	217.97	112	129.08	5' UTR	7	19505804	19508331	2528	2	232946	uc009fma.1	12426	ENSMUSG00000057667	Bloc1s3	biogenesis of lysosomal organelles complex-1, subunit 3	NA	NA	NA
chr3	84469969	84483477	13509	*	7.84	8.19	7.38	0.81	3.72e-07	6.55e-06	274.35	309.3	149	183.38	Promoter (<=1kb)	3	84442196	84479491	37296	2	229474	uc008pqc.3	0	ENSMUSG00000041842	Fhdc1	FH2 domain containing 1	uc008pqc.3;uc008pqd.3	229474;229474	0;0
chr2	180096770	180106036	9267	*	7.22	7.62	6.68	0.94	3.79e-07	6.68e-06	197.38	195.45	103	101.48	Promoter (<=1kb)	2	180099465	180104407	4943	2	99296	uc008oij.2	0	ENSMUSG00000039059	Hrh3	histamine receptor H3	uc008oij.2;uc029ujf.2	99296;99296	0;0
chr5	67084415	67108474	24060	*	8.92	9.16	8.63	0.53	3.82e-07	6.71e-06	595.05	549.2	390	400.59	Promoter (<=1kb)	5	67094397	67099126	4730	2	18935	uc008xpm.1	0	ENSMUSG00000012520	Phox2b	paired-like homeobox 2b	uc008xpm.1;uc008xpn.1	18935;18935	0;0
chr13	21976359	22020989	44631	*	9.64	9.83	9.42	0.41	3.83e-07	6.71e-06	898.36	927.3	693	679.23	Promoter (<=1kb)	13	21981181	21985907	4727	1	195236	uc011ywx.2	0	ENSMUSG00000016982	Pom121l2	POM121 membrane glycoprotein-like 2 (rat)	uc011ywx.2;uc011ywy.1;uc007prz.1	195236;195236;54373	0;0;0
chr10	90810770	90839478	28709	*	8.88	9.12	8.59	0.53	3.83e-07	6.71e-06	566.91	546.15	391	379.23	Promoter (<=1kb)	10	90829843	90923602	93760	1	77531	uc007gtd.1	0	ENSMUSG00000058589	Anks1b	ankyrin repeat and sterile alpha motif domain containing 1B	uc057kjj.1;uc033fsd.2;uc007gta.2;uc033fsa.2;uc033fsb.2;uc033fsc.2;uc007gtd.1	77531;77531;77531;77531;77531;77531;77531	0;0;0;0;0;0;0
chr13	52977032	52984018	6987	*	7.03	7.45	6.43	1.01	3.94e-07	6.9e-06	174.21	175.35	84	89.02	Promoter (<=1kb)	13	52967209	52981039	13831	2	18030	uc007qni.1	0	ENSMUSG00000056749	Nfil3	nuclear factor, interleukin 3, regulated	uc007qnh.1;uc007qni.1	18030;18030	-3967;0
chr6	38283365	38298525	15161	*	7.99	8.31	7.57	0.74	3.97e-07	6.94e-06	333.11	300.78	200	179.82	Promoter (<=1kb)	6	38287394	38299259	11866	2	209032	uc009bjx.2	734	ENSMUSG00000047749	Zc3hav1l	zinc finger CCCH-type, antiviral 1-like	uc009bjx.2	209032	0
chr18	77181295	77191521	10227	*	7.23	7.64	6.67	0.97	4.03e-07	7.04e-06	207.31	191.18	90	113.06	Promoter (<=1kb)	18	77185847	77255450	69604	1	225742	uc008frg.2	0	ENSMUSG00000025425	St8sia5	ST8 alpha-N-acetyl-neuraminide alpha-2,8-sialyltransferase 5	uc008frg.2;uc008frh.2	225742;225742	0;0
chr6	55109354	55119477	10124	*	7.38	7.76	6.85	0.91	4.06e-07	7.08e-06	219.31	214.32	104	126.41	Promoter (<=1kb)	6	55090049	55117913	27865	2	12922	uc009caj.3	0	ENSMUSG00000003476	Crhr2	corticotropin releasing hormone receptor 2	uc009caj.3;uc012emh.2;uc009cak.3;uc009cal.3;uc009cam.2	12922;12922;12922;12922;12922	0;0;0;0;0
chr16	71823883	71865604	41722	*	9.32	9.08	9.53	-0.45	4.17e-07	7.27e-06	546.22	538.24	747	732.64	Distal Intergenic	16	72226383	72234327	7945	2	319533	uc007zqy.1	368723	ENSMUSG00000116769	8030451O07Rik	RIKEN cDNA 8030451O07 gene	NA	NA	NA
chr2	155624219	155632807	8589	*	7.05	7.46	6.46	1.01	4.2e-07	7.31e-06	176.69	176.57	84	91.69	Promoter (<=1kb)	2	155629060	155629680	621	1	668940	uc008nlb.1	0	ENSMUSG00000074652	Myh7b	myosin, heavy chain 7B, cardiac muscle, beta	uc008nlc.2;uc012che.1;uc008nla.2;uc008nlb.1;uc012chd.1	56407;56407;668940;668940;735275	59577;59577;0;0;1339
chr2	31240074	31248441	8368	*	7.11	7.52	6.54	0.98	4.25e-07	7.39e-06	180.42	187.53	90	96.14	Promoter (<=1kb)	2	31245923	31295472	49550	1	14299	uc008jdq.2	0	ENSMUSG00000062661	Ncs1	neuronal calcium sensor 1	uc008jdq.2	14299	0
chr3	8762658	8773845	11188	*	7.4	7.78	6.89	0.89	4.27e-07	7.41e-06	211.87	226.5	117	120.18	Distal Intergenic	3	8663359	8667038	3680	2	15213	uc008oop.1	-95620	ENSMUSG00000040289	Hey1	hairy/enhancer-of-split related with YRPW motif 1	NA	NA	NA
chr13	41348040	41362191	14152	*	7.8	8.15	7.35	0.8	4.32e-07	7.49e-06	278.9	288.6	183	142.43	Promoter (<=1kb)	13	41309916	41359001	49086	2	18003	uc007qfd.2	0	ENSMUSG00000021365	Nedd9	neural precursor cell expressed, developmentally down-regulated gene 9	uc007qfd.2;uc007qfe.3	18003;18003	0;0
chr2	160909129	160916679	7551	*	7.13	7.54	6.57	0.97	4.34e-07	7.51e-06	186.21	185.1	97	92.58	Promoter (<=1kb)	2	160906438	160912339	5902	2	280635	uc008nrk.2	0	ENSMUSG00000050700	Emilin3	elastin microfibril interfacer 3	uc008nrk.2;uc008nrl.2;uc008nrh.2;uc008nri.2;uc008nrj.2	280635;280635;64899;64899;64899	0;0;0;20961;20961
chr15	48693453	48782543	89091	*	10.43	10.25	10.58	-0.32	4.35e-07	7.52e-06	1212.85	1229.91	1586	1472.41	Intron (uc033gtv.1/239420, intron 1 of 70)	15	47580638	48791989	1211352	2	239420	uc033gtv.1	9446	ENSMUSG00000022311	Csmd3	CUB and Sushi multiple domains 3	uc033gtv.1;uc007vqv.1	239420;239420	0;0
chr5	83914024	83953202	39179	*	9.23	8.98	9.45	-0.46	4.36e-07	7.52e-06	503.18	509.62	708	686.35	Distal Intergenic	5	84054761	84417382	362622	2	13839	uc008xwv.4	464180	ENSMUSG00000029245	Epha5	Eph receptor A5	NA	NA	NA
chr12	79129660	79138115	8456	*	7.44	7.81	6.94	0.87	4.36e-07	7.52e-06	235.87	214.32	128	117.51	Promoter (<=1kb)	12	79130788	79156301	25514	1	11847	uc007nzv.2	0	ENSMUSG00000021125	Arg2	arginase type II	uc007nzv.2	11847	0
chr9	20719392	20733713	14322	*	7.81	8.14	7.37	0.77	4.44e-07	7.63e-06	277.66	286.78	160	171.81	Promoter (<=1kb)	9	20667986	20728214	60229	2	244723	uc009oje.1	0	ENSMUSG00000032172	Olfm2	olfactomedin 2	uc009oje.1	244723	0
chr11	24059333	24112783	53451	*	9.68	9.87	9.46	0.41	4.44e-07	7.63e-06	923.6	944.35	726	681.9	Promoter (<=1kb)	11	24078056	24090906	12851	1	14025	uc007ifs.2	0	ENSMUSG00000000861	Bcl11a	B cell CLL/lymphoma 11A (zinc finger protein)	uc007ifs.2;uc007ift.3;uc007ifu.2;uc007ifv.2;uc007ifw.2	14025;14025;14025;14025;14025	0;0;0;0;0
chr10	39196809	39246419	49611	*	9.53	9.73	9.3	0.43	4.46e-07	7.66e-06	861.53	835.36	616	646.29	Distal Intergenic	10	39150971	39163794	12824	2	327743	uc011xcu.1	-33015	ENSMUSG00000062074	Wisp3	WNT1 inducible signaling pathway protein 3	NA	NA	NA
chr16	78258478	78286820	28343	*	8.84	9.09	8.54	0.55	4.48e-07	7.67e-06	552.84	533.37	394	348.07	Intron (uc007zsl.3/100503619, intron 1 of 4)	16	78250861	78295015	44155	2	100503619	uc007zsl.3	8195	ENSMUSG00000109841	E330011O21Rik	RIKEN cDNA E330011O21 gene	uc029syd.2;uc007zsl.3	100503619;100503619	-3024;0
chr14	79300656	79308896	8241	*	7.17	7.59	6.57	1.02	4.53e-07	7.76e-06	180.42	205.19	81	108.61	Promoter (<=1kb)	14	79288750	79301635	12886	2	66214	uc007ust.1	0	ENSMUSG00000022018	Rgcc	regulator of cell cycle	uc007ust.1	66214	0
chr2	93950808	93961516	10709	*	7.5	7.86	7.01	0.86	4.55e-07	7.79e-06	243.31	222.84	124	133.53	Promoter (<=1kb)	2	93955810	93957100	1291	2	620695	uc012bzx.1	0	ENSMUSG00000087006	Gm13889	predicted gene 13889	uc012bzx.1	620695	0
chr14	8312101	8319754	7654	*	7.06	7.49	6.44	1.05	4.59e-07	7.83e-06	198.62	160.74	94	80.12	Promoter (<=1kb)	14	8296278	8317565	21288	2	268709	uc007sfc.2	0	ENSMUSG00000021750	Fam107a	family with sequence similarity 107, member A	uc007sfa.1;uc007sfb.2;uc007sfc.2	268709;268709;268709	0;0;0
chr2	168046452	168060454	14003	*	7.67	8.01	7.21	0.79	4.82e-07	8.21e-06	255.32	259.99	151	145.99	Exon (uc057leu.1/uc057leu.1, exon 1 of 2)	2	168081004	168101203	20200	1	58220	uc008oao.2	-20550	ENSMUSG00000044641	Pard6b	par-6 family cell polarity regulator beta	NA	NA	NA
chr14	88696162	88786411	90250	*	10.51	10.35	10.66	-0.31	4.82e-07	8.21e-06	1279.89	1323.67	1651	1574.78	Distal Intergenic	14	88464747	88471396	6650	2	219257	uc007uuh.2	-224766	ENSMUSG00000050505	Pcdh20	protocadherin 20	NA	NA	NA
chr5	136230412	136249713	19302	*	8.12	8.42	7.74	0.69	4.85e-07	8.25e-06	348.83	338.53	209	218.1	Promoter (<=1kb)	5	136218149	136244940	26792	2	23921	uc009aag.2	0	ENSMUSG00000005057	Sh2b2	SH2B adaptor protein 2	uc009aaj.2;uc009aak.2;uc009aal.2;uc009aam.2;uc009aag.2;uc009aah.2;uc009aai.2	13047;13047;13047;13047;23921;23921;23921	0;0;0;0;0;0;0
chr3	134226173	134250047	23875	*	8.7	8.97	8.37	0.6	4.87e-07	8.27e-06	490.77	510.84	363	299.11	Promoter (<=1kb)	3	134240505	134240583	79	2	100316832	uc012cya.1	0	ENSMUSG00000084564	Mir1895	microRNA 1895	uc012cya.1;uc008rkw.3	100316832;319478	0;0
chr11	50020358	50033808	13451	*	7.91	8.23	7.48	0.75	4.9e-07	8.31e-06	292.14	309.91	168	189.61	Promoter (<=1kb)	11	50025331	50089352	64022	1	59044	uc007irk.1	0	ENSMUSG00000020376	Rnf130	ring finger protein 130	uc007irk.1;uc007irl.2;uc007irm.2;uc007irn.2	59044;59044;59044;59044	0;0;0;0
chr8	14091315	14102956	11642	*	7.94	8.26	7.53	0.73	4.9e-07	8.31e-06	317.39	296.52	191	178.93	Promoter (<=1kb)	8	14095875	14847687	751813	1	244310	uc009kyy.3	0	ENSMUSG00000047495	Dlgap2	DLG associated protein 2	uc009kyx.1;uc009kyy.3;uc012gac.2	234086;244310;244310	-988;0;0
chr8	32582577	32714256	131680	*	11.44	11.33	11.55	-0.22	4.92e-07	8.33e-06	2558.53	2585.25	2973	3029.38	Distal Intergenic	8	32888505	32950026	61522	2	100042715	uc012gbz.1	235770	ENSMUSG00000079070	Gm3985	predicted gene 3985	NA	NA	NA
chr8	125877117	126006351	129235	*	11.28	11.39	11.15	0.24	5.04e-07	8.51e-06	2682.67	2700.32	2237	2319.89	Promoter (<=1kb)	8	125897914	125908144	10231	1	102632990	uc009nyp.1	0	NA	A730098A19Rik	RIKEN cDNA A730098A19 gene	uc009nyp.1;uc009nyr.4;uc009nyq.1;uc009nyn.2;uc009nyo.1	102632990;16525;234878;270109;270109	0;0;0;0;0
chr14	52312477	52331070	18594	*	8.17	8.47	7.8	0.67	5.19e-07	8.76e-06	352.56	356.8	230	214.54	Promoter (<=1kb)	14	52311177	52316323	5147	2	50524	uc007tpe.2	0	ENSMUSG00000049532	Sall2	spalt like transcription factor 2	uc007tpe.2;uc007tpf.2	50524;50524	0;0
chr12	11146544	11157504	10961	*	7.59	7.94	7.12	0.81	5.27e-07	8.89e-06	245.8	244.16	137	141.54	Promoter (<=1kb)	12	11090202	11150373	60172	2	238076	uc007nas.1	0	ENSMUSG00000043673	Kcns3	potassium voltage-gated channel, delayed-rectifier, subfamily S, member 3	uc007nas.1;uc011ykd.1	238076;238076	0;0
chr4	84864522	84889081	24560	*	8.74	8.99	8.43	0.56	5.29e-07	8.9e-06	514.77	502.31	326	362.32	Promoter (<=1kb)	4	84884309	84958604	74296	1	338349	uc008tlk.3	0	ENSMUSG00000038070	Cntln	centlein, centrosomal protein	uc008tlk.3;uc008tll.2	338349;338349	0;0
chr14	55761417	55770656	9240	*	7.26	7.65	6.73	0.92	5.3e-07	8.91e-06	202.35	198.49	109	103.26	Promoter (<=1kb)	14	55765962	55768492	2531	1	16995	uc007uar.2	0	ENSMUSG00000046908	Ltb4r1	leukotriene B4 receptor 1	uc007uat.1;uc007uau.1;uc007uap.3;uc007uar.2;uc007uaq.1	104110;104110;12684;16995;57260	0;0;-2993;0;0
chr6	37727837	37774195	46359	*	9.4	9.61	9.15	0.46	5.32e-07	8.93e-06	782.91	781.78	606	534.13	Distal Intergenic	6	37870811	37946799	75989	1	21848	uc009bji.1	-96616	ENSMUSG00000029833	Trim24	tripartite motif-containing 24	NA	NA	NA
chr2	68460627	68478615	17989	*	8.16	8.46	7.79	0.67	5.4e-07	9.05e-06	355.04	348.88	226	215.43	Promoter (<=1kb)	2	68210447	68471981	261535	2	53416	uc008jxo.1	0	ENSMUSG00000027030	Stk39	serine/threonine kinase 39	uc008jxo.1;uc008jxp.1	53416;53416	0;0
chrY	140456	146179	5724	*	8.67	8.94	8.35	0.59	5.4e-07	9.05e-06	518.49	461.52	340	311.57	Distal Intergenic	21	206150	207789	1640	1	69438	uc057atw.1	-59971	ENSMUSG00000101796	1700020D14Rik	RIKEN cDNA 1700020D14 gene	NA	NA	NA
chr5	99725994	99742657	16664	*	8.18	8.47	7.8	0.67	5.56e-07	9.29e-06	361.66	349.49	222	225.22	Promoter (<=1kb)	5	99297244	99729060	431817	2	319818	uc008ygn.2	0	ENSMUSG00000089809	A930011G23Rik	RIKEN cDNA A930011G23 gene	uc008ygn.2;uc008ygo.2;uc057lms.1;uc008ygs.1	319818;319818;319818;330133	0;0;0;0
chr11	90403710	90424187	20478	*	8.51	8.79	8.17	0.62	5.56e-07	9.29e-06	447.32	436.56	265	309.79	Distal Intergenic	11	90336535	90390917	54383	2	217082	uc007kws.1	-12793	ENSMUSG00000003949	Hlf	hepatic leukemia factor	NA	NA	NA
chr7	29559844	29595493	35650	*	9.1	9.32	8.83	0.49	5.63e-07	9.4e-06	636.84	640.53	447	464.69	5' UTR	7	29399327	29518560	119234	2	74206	uc009gbv.1	-41284	ENSMUSG00000030583	Sipa1l3	signal-induced proliferation-associated 1 like 3	NA	NA	NA
chr2	167276805	167295824	19020	*	7.65	8.01	7.18	0.83	5.65e-07	9.42e-06	270.21	245.37	131	159.35	Downstream (2-3kb)	2	167203196	167240537	37342	2	19223	uc008nzl.1	-36268	ENSMUSG00000017969	Ptgis	prostaglandin I2 (prostacyclin) synthase	uc008nzm.2	56336	53354
chr2	180332003	180340912	8910	*	7.21	7.61	6.67	0.94	5.66e-07	9.42e-06	187.87	202.14	102	101.48	Promoter (<=1kb)	2	180332857	180340732	7876	1	100036520	uc029ujg.3	0	ENSMUSG00000056061	Gata5os	GATA binding protein 5, opposite strand	uc029ujg.3;uc008oix.2;uc012cma.1	100036520;14464;14464	0;0;0
chr5	33962311	33999689	37379	*	9.34	9.55	9.1	0.45	5.73e-07	9.51e-06	728.7	773.87	555	541.25	Promoter (<=1kb)	5	33995984	34005916	9933	1	269642	uc008xbs.1	0	ENSMUSG00000048142	Nat8l	N-acetyltransferase 8-like	uc008xbs.1;uc008xbq.2;uc008xbr.3;uc057bty.1;uc008xbp.2	269642;381633;381633;381633;381633	0;0;0;0;0
chr4	149575801	149591323	15523	*	7.87	8.19	7.45	0.75	5.73e-07	9.51e-06	306.63	279.47	175	174.48	Promoter (<=1kb)	4	149586468	149648899	62432	1	65945	uc008vwo.2	0	ENSMUSG00000039953	Clstn1	calsyntenin 1	uc008vwo.2;uc008vwp.2	65945;65945	0;0
chr9	21240908	21249571	8664	*	7.55	7.91	7.08	0.82	5.76e-07	9.54e-06	244.56	235.02	137	134.42	Promoter (<=1kb)	9	21242917	21248443	5527	2	94226	uc009oks.2	0	ENSMUSG00000045087	S1pr5	sphingosine-1-phosphate receptor 5	uc009oko.2;uc009okp.2;uc009okq.2;uc009okr.2;uc009oks.2	50868;50868;50868;50868;94226	-1576;-1576;-1576;-1576;0
chr19	24890528	24910851	20324	*	8.65	8.9	8.33	0.57	5.77e-07	9.55e-06	472.56	485.88	334	310.68	Promoter (<=1kb)	19	24898965	24901309	2345	2	14237	uc008hav.1	0	ENSMUSG00000051490	Foxd4	forkhead box D4	uc008hav.1	14237	0
chr17	29235552	29240108	4557	*	6.58	7.06	5.86	1.19	5.78e-07	9.56e-06	126.62	140.04	56	60.53	Promoter (<=1kb)	17	29156521	29237790	81270	2	240058	uc008bsk.2	0	ENSMUSG00000024008	Cpne5	copine V	uc008bsk.2;uc008bsl.2	240058;240058	0;0
chr16	77257674	77309849	52176	*	9.65	9.43	9.83	-0.4	5.85e-07	9.66e-06	700.56	678.28	933	891.1	Intron (uc007zsd.1/77994, intron 2 of 3)	16	77236317	77363679	127363	1	77994	uc007zsd.1	21357	ENSMUSG00000090386	Mir99ahg	Mir99a and Mirlet7c-1 host gene (non-protein coding)	uc007zsd.1;uc007zse.1	77994;77994	0;0
chr6	29733935	29738295	4361	*	6.27	6.8	5.41	1.4	5.93e-07	9.78e-06	102.62	120.56	35	49.85	Promoter (<=1kb)	6	29735497	29761366	25870	1	319757	uc009bef.2	0	ENSMUSG00000001761	Smo	smoothened, frizzled class receptor	uc009bef.2	319757	0
chr19	10038485	10054968	16484	*	7.94	8.26	7.53	0.74	5.98e-07	9.86e-06	292.97	322.09	177	191.39	Promoter (<=1kb)	19	10041548	10059671	18124	1	60527	uc008goz.1	0	ENSMUSG00000024664	Fads3	fatty acid desaturase 3	uc008goz.1;uc057lai.1;uc008gov.1;uc057lah.1;uc008gow.1;uc008gox.1;uc008goy.1	60527;60527;74760;74760;74760;74760;74760	0;0;36816;20257;20257;20257;20257
chr7	12009912	12023729	13818	*	8.55	8.82	8.22	0.61	6.02e-07	9.9e-06	466.77	438.99	279	316.02	Distal Intergenic	7	12041299	12042219	921	1	628946	uc012eyx.1	-17570	ENSMUSG00000095864	Vmn1r77	vomeronasal 1 receptor 77	NA	NA	NA
chr1	147864770	147932508	67739	*	9.88	9.68	10.06	-0.38	6.16e-07	1.01e-05	833.39	809.18	1112	1027.3	Distal Intergenic	1	146497738	146517554	19817	1	215378	uc007cxr.1	1367032	ENSMUSG00000035131	Brinp3	bone morphogenetic protein/retinoic acid inducible neural specific 3	NA	NA	NA
chr15	60817400	60835238	17839	*	8.09	8.39	7.7	0.69	6.36e-07	1.04e-05	334.76	335.49	213	203.86	Promoter (<=1kb)	15	60822965	60831400	8436	1	320469	uc011zte.1	0	NA	9930014A18Rik	RIKEN cDNA 9930014A18 gene	uc011zte.1;uc011ztf.1;uc007vya.2	320469;320469;399603	0;0;0
chr8	96939845	97109651	169807	*	11.75	11.64	11.85	-0.21	6.38e-07	1.05e-05	3142.82	3261.7	3750	3640.07	Distal Intergenic	8	95864137	95888365	24229	2	14719	uc009mzi.1	-1051480	ENSMUSG00000031672	Got2	glutamatic-oxaloacetic transaminase 2, mitochondrial	NA	NA	NA
chr2	25576161	25581947	5787	*	6.89	7.32	6.26	1.06	6.5e-07	1.06e-05	171.31	149.17	74	79.23	Promoter (<=1kb)	2	25575416	25580099	4684	2	381353	uc008isq.1	0	ENSMUSG00000029419	Ajm1	apical junction component 1	uc008isr.1;uc008iss.3;uc008ist.1;uc008iso.1;uc008isq.1;uc008isp.1	227624;227624;227624;381352;381353;75454	0;8425;0;-4845;0;-1290
chr11	115307333	115325161	17829	*	8.06	8.37	7.65	0.72	6.54e-07	1.07e-05	333.94	328.18	182	219.88	Promoter (<=1kb)	11	115315192	115321918	6727	2	16470	uc007mhc.1	0	ENSMUSG00000045288	Ush1g	USH1 protein network component sans	uc007mhc.1;uc007mhb.1;uc007mhd.1	16470;237987;237987	0;0;0
chr1	5007589	5032336	24748	*	8.75	9	8.45	0.54	6.62e-07	1.08e-05	511.46	509.62	354	347.18	Promoter (<=1kb)	1	4909576	5018734	109159	2	58175	uc056ycb.1	0	ENSMUSG00000002459	Rgs20	regulator of G-protein signaling 20	uc056ycb.1;uc007afk.3;uc007afl.2	58175;58175;58175	0;0;0
chr2	61802199	61836999	34801	*	9.41	9.61	9.17	0.43	6.62e-07	1.08e-05	782.5	778.13	568	586.65	Promoter (<=1kb)	2	61804453	61814114	9662	1	21375	uc008jvd.2	0	ENSMUSG00000035033	Tbr1	T-box brain gene 1	uc008jvd.2;uc008jvc.1	21375;59029	0;0
chr1	89918786	89949705	30920	*	8.99	9.22	8.72	0.5	6.67e-07	1.09e-05	601.67	589.99	412	429.97	Promoter (<=1kb)	1	89927962	89931176	3215	2	14472	uc007bzb.1	0	ENSMUSG00000034486	Gbx2	gastrulation brain homeobox 2	uc007bzb.1;uc007bzd.1;uc007bze.1;uc011wpb.1	14472;208372;208372;208372	0;0;0;0
chr8	119604119	119649116	44998	*	9.73	9.92	9.52	0.39	6.78e-07	1.1e-05	995.19	940.09	730	742.43	Promoter (<=1kb)	8	119597871	119605240	7370	2	21341	uc009npx.1	0	ENSMUSG00000031832	Taf1c	TATA-box binding protein associated factor, RNA polymerase I, C	uc009npx.1;uc009npy.1;uc009npz.1;uc009nqb.1;uc009nqa.2	21341;21341;21341;66733;75773	0;0;0;0;0
chr18	37658960	37703697	44738	*	9.67	9.86	9.46	0.4	6.81e-07	1.11e-05	919.05	938.26	693	715.73	Promoter (<=1kb)	18	37680458	37841873	161416	1	93699	uc008eqo.2	0	ENSMUSG00000103037	Pcdhgb1	protocadherin gamma subfamily B, 1	uc008eoy.3;uc056zgg.2;uc056zgh.2;uc008eqo.2;uc008eqq.2;uc008eql.2;uc008eqm.2;uc008eqn.2;uc008eqp.2;uc008eqr.2;uc008eqs.2	100384868;103611158;103611159;93699;93700;93709;93710;93711;93712;93713;93714	0;0;0;0;0;0;0;0;0;0;0
chr14	118407030	118448559	41530	*	9.41	9.62	9.17	0.45	6.92e-07	1.12e-05	797.39	774.48	608	545.7	Distal Intergenic	14	118365878	118398165	32288	1	73306	uc029snb.1	41152	ENSMUSG00000099911	1700044C05Rik	RIKEN cDNA 1700044C05 gene	NA	NA	NA
chr1	40669672	40690313	20642	*	8.56	8.82	8.24	0.58	7.04e-07	1.14e-05	457.66	447.52	304	301.78	Promoter (<=1kb)	1	40681712	40727160	45449	1	226999	uc007aum.1	0	ENSMUSG00000026062	Slc9a2	solute carrier family 9 (sodium/hydrogen exchanger), member 2	uc007aum.1;uc007aun.1	226999;226999	0;0
chr8	53517493	53972281	454789	*	13.2	13.11	13.27	-0.16	7.09e-07	1.15e-05	8915.75	8809.68	10188	9608.03	Promoter (<=1kb)	8	53586867	53639065	52199	2	234258	uc009lsa.2	0	ENSMUSG00000039396	Neil3	nei like 3 (E. coli)	uc009lrz.2;uc012gdu.2;uc012gdv.1;uc009lsa.2;uc009lsb.2	11593;11593;11593;234258;234258	0;0;0;0;0
chr5	72864042	72880504	16463	*	8.05	8.35	7.66	0.69	7.19e-07	1.16e-05	333.52	319.05	201	202.97	Promoter (<=1kb)	5	72755718	72868448	112731	2	21682	uc008xsc.3	0	ENSMUSG00000029217	Tec	tec protein tyrosine kinase	uc008xsc.3;uc008xsd.3;uc008xse.3;uc008xsf.3;uc008xsg.2	21682;21682;21682;21682;21682	0;0;0;0;0
chr18	25747436	25761626	14191	*	8.01	8.32	7.6	0.72	7.2e-07	1.16e-05	335.59	304.43	208	179.82	Promoter (<=1kb)	18	25477620	25753983	276364	2	108013	uc008ehk.2	0	ENSMUSG00000024268	Celf4	CUGBP, Elav-like family member 4	uc008ehk.2;uc008ehl.2;uc012ban.1;uc012bao.1;uc012bap.1;uc012baq.1	108013;108013;108013;108013;108013;108013	0;0;0;0;0;0
chrX	170004269	170005759	1491	*	7.08	7.49	6.5	0.99	7.32e-07	1.18e-05	177.11	181.44	83	97.92	Distal Intergenic	20	169975043	169978917	3875	2	654820	uc009uyi.1	-25352	ENSMUSG00000072844	G530011O06Rik	RIKEN cDNA G530011O06 gene	NA	NA	NA
chr13	98500695	98536605	35911	*	9.13	9.35	8.87	0.48	7.41e-07	1.19e-05	668.7	633.83	473	462.02	Distal Intergenic	13	98424110	98435065	10956	2	70090	uc029scu.1	-65630	ENSMUSG00000099446	2310005E17Rik	RIKEN cDNA 2310005E17 gene	NA	NA	NA
chr12	86975782	86998711	22930	*	8.41	8.69	8.07	0.62	7.46e-07	1.2e-05	426.63	396.98	262	274.18	Promoter (<=1kb)	12	86983381	86988676	5296	2	238331	uc007oie.1	0	ENSMUSG00000048483	Zdhhc22	zinc finger, DHHC-type containing 22	uc007oie.1	238331	0
chr3	105443337	105459760	16424	*	8.08	8.39	7.69	0.7	7.51e-07	1.21e-05	359.18	313.57	211	202.08	Promoter (<=1kb)	3	105452330	105667589	215260	1	56543	uc008qux.1	0	ENSMUSG00000040896	Kcnd3	potassium voltage-gated channel, Shal-related family, member 3	uc008qux.1;uc008quy.1;uc008quz.1;uc008quw.1;uc029uob.1	56543;56543;56543;78635;78635	0;0;0;0;0
chr11	101260742	101273788	13047	*	7.79	8.12	7.35	0.77	7.55e-07	1.21e-05	262.35	294.08	167	159.35	Promoter (<=1kb)	11	101260567	101275103	14537	1	69847	uc057kmk.1	175	ENSMUSG00000035112	Wnk4	WNK lysine deficient protein kinase 4	uc007loa.2;uc007lob.2;uc007loc.2;uc007lod.2;uc033gaf.1;uc007log.1;uc057kmk.1;uc007loe.2;uc007lof.2	28084;28084;28084;28084;28084;52469;69847;69847;69847	14408;7138;7138;7138;7138;5160;0;0;0
chr8	102166061	102246220	80160	*	10.72	10.58	10.86	-0.28	7.59e-07	1.22e-05	1537.27	1523.99	1865	1843.62	Distal Intergenic	8	102632095	102785111	153017	2	12552	uc009mzu.2	538891	ENSMUSG00000031673	Cdh11	cadherin 11	NA	NA	NA
chr11	119151899	119163201	11303	*	7.51	7.87	7.03	0.83	7.59e-07	1.22e-05	230.9	235.63	125	137.09	Promoter (<=1kb)	11	119154076	119154137	62	2	102465563	uc033gbv.1	0	ENSMUSG00000098704	Mir6934	microRNA 6934	uc033gbv.1;uc057knb.1;uc007mqa.2;uc007mqb.2	102465563;207592;207592;207592	0;0;0;0
chr9	65387540	65404054	16515	*	8.02	8.34	7.63	0.71	7.61e-07	1.22e-05	308.7	337.31	200	195.85	Promoter (<=1kb)	9	65398488	65412708	14221	1	70784	uc009qdf.3	0	ENSMUSG00000041696	Rasl12	RAS-like, family 12	uc009qdf.3;uc012gvk.2;uc012gvl.1;uc009qde.2	70784;70784;70784;74492	0;0;0;0
chr4	113912595	113954676	42082	*	9.68	9.46	9.87	-0.41	7.93e-07	1.27e-05	710.91	700.8	986	887.54	3' UTR	4	113477891	113999503	521613	2	242627	uc009vcz.1	44827	ENSMUSG00000078598	Skint5	selection and upkeep of intraepithelial T cells 5	uc009vcz.1;uc012diu.1;uc009vda.1	242627;242627;242627	0;0;0
chr14	54909743	54917936	8194	*	6.9	7.33	6.3	1.03	7.96e-07	1.27e-05	165.93	155.87	77	80.12	Promoter (<=1kb)	14	54906304	54913103	6800	2	59049	uc007txj.1	0	ENSMUSG00000022199	Slc22a17	solute carrier family 22 (organic cation transporter), member 17	uc007txm.2;uc007txj.1;uc007txk.2;uc007txl.2;uc011zlh.1	13644;59049;59049;59049;59049	0;0;0;0;-755
chr16	98051885	98107080	55196	*	10.01	10.18	9.82	0.36	8.05e-07	1.28e-05	1202.09	1123.36	919	890.21	Promoter (<=1kb)	16	98001310	98081992	80683	2	320586	uc008aea.1	0	ENSMUSG00000116673	A630089N07Rik	RIKEN cDNA A630089N07 gene	uc008aea.1;uc008aeb.1;uc012ajd.1;uc008aec.2	320586;320586;320586;320586	0;0;0;0
chr8	63916902	64287364	370463	*	12.96	12.88	13.03	-0.15	8.32e-07	1.32e-05	7531.59	7581.6	8489	8245.12	Promoter (<=1kb)	8	64014770	64205993	191224	2	21892	uc009lut.1	0	ENSMUSG00000053626	Tll1	tolloid-like	uc009lut.1;uc009luu.1;uc012geg.1	21892;21892;244495	0;0;0
chr3	9097394	9114177	16784	*	7.9	8.22	7.49	0.73	8.34e-07	1.33e-05	307.04	288.6	174	186.05	Distal Intergenic	3	9061964	9071076	9113	1	75149	uc008oox.2	35430	ENSMUSG00000103116	4930539M17Rik	RIKEN cDNA 4930539M17 gene	NA	NA	NA
chr13	37816473	37831236	14764	*	7.66	8	7.22	0.78	8.37e-07	1.33e-05	260.69	250.24	150	147.77	Promoter (<=1kb)	13	37826038	37935545	109508	1	68750	uc007qcw.3	0	ENSMUSG00000039087	Rreb1	ras responsive element binding protein 1	uc007qcw.3;uc007qcx.3;uc007qcy.3;uc007qcz.2	68750;68750;68750;68750	0;0;0;0
chr12	64005814	64059188	53375	*	9.57	9.34	9.77	-0.42	8.4e-07	1.33e-05	632.7	664.88	917	824.33	Distal Intergenic	12	64471333	64474898	3566	2	623046	uc011yme.1	415710	ENSMUSG00000043060	Fscb	fibrous sheath CABYR binding protein	NA	NA	NA
chr1	68958500	69008240	49741	*	9.57	9.34	9.76	-0.42	8.48e-07	1.34e-05	651.32	644.79	915	821.66	Intron (uc007bjb.3/13869, intron 1 of 26)	1	68032186	69108059	1075874	2	13869	uc007bjb.3	99819	ENSMUSG00000062209	Erbb4	erb-b2 receptor tyrosine kinase 4	uc007bjb.3	13869	0
chr14	88269863	88348960	79098	*	10.34	10.16	10.49	-0.33	8.49e-07	1.34e-05	1190.92	1094.74	1463	1419.88	Distal Intergenic	14	88464747	88471396	6650	2	219257	uc007uuh.2	122436	ENSMUSG00000050505	Pcdh20	protocadherin 20	NA	NA	NA
chr8	88598248	88663707	65460	*	10.17	10.34	9.98	0.36	8.53e-07	1.35e-05	1292.3	1307.84	947	1075.37	Promoter (<=1kb)	8	88647347	88665700	18354	1	257632	uc009mrq.1	0	ENSMUSG00000055994	Nod2	nucleotide-binding oligomerization domain containing 2	uc009mrq.1;uc009mrr.1;uc012gib.1;uc009mrs.1;uc009mrp.1;uc009mro.2;uc012gia.1	257632;257632;257632;257632;71607;93960;93960	0;0;0;0;0;0;70615
chr2	151700435	151707158	6724	*	6.84	7.3	6.14	1.16	8.58e-07	1.35e-05	154.76	160.74	54	87.24	Promoter (<=1kb)	2	151702008	151707310	5303	1	108832	uc008nei.2	0	ENSMUSG00000044364	Tmem74b	transmembrane protein 74B	uc008nei.2;uc008nej.1	108832;108832	0;0
chr9	40680380	40698689	18310	*	8.02	8.33	7.61	0.72	8.61e-07	1.36e-05	321.52	323.31	176	214.54	Promoter (<=1kb)	9	40685964	40784046	98083	1	71566	uc009ozt.1	0	ENSMUSG00000032024	Clmp	CXADR-like membrane protein	uc009ozt.1	71566	0
chr11	6059367	6066942	7576	*	6.9	7.33	6.26	1.07	8.79e-07	1.38e-05	145.66	177.18	76	77.45	Promoter (<=1kb)	11	5969642	6065748	96107	2	12323	uc007hxr.3	0	ENSMUSG00000057897	Camk2b	calcium/calmodulin-dependent protein kinase II, beta	uc007hxr.3;uc007hxs.3;uc007hxt.3	12323;12323;12323	0;0;0
chr9	97835779	97876155	40377	*	9.32	9.52	9.08	0.44	8.88e-07	1.4e-05	746.91	724.55	553	528.78	Intron (uc009rdd.1/64085, intron 1 of 17)	9	97444395	98033167	588773	2	64085	uc009rdd.1	157012	ENSMUSG00000032452	Clstn2	calsyntenin 2	uc009rdd.1	64085	0
chr1	163307472	163324188	16717	*	8.36	8.63	8.02	0.62	9.1e-07	1.43e-05	399.32	393.94	261	256.38	Promoter (<=1kb)	1	163245119	163313650	68532	2	18933	uc007dhh.1	0	ENSMUSG00000026586	Prrx1	paired related homeobox 1	uc007dhh.1;uc007dhi.1;uc007dhk.1	18933;18933;18933	0;0;0
chr8	52783290	52835244	51955	*	10.06	9.88	10.22	-0.34	9.12e-07	1.43e-05	924.84	954.7	1207	1176.86	Distal Intergenic	8	52356611	52403339	46729	1	330767	uc009lry.1	426679	ENSMUSG00000110013	1190028D05Rik	RIKEN cDNA 1190028D05 gene	NA	NA	NA
chr12	99962029	99973479	11451	*	7.78	8.11	7.35	0.77	9.18e-07	1.44e-05	260.69	293.47	159	166.47	Promoter (<=1kb)	12	99964499	100062682	98184	1	217826	uc007osi.2	0	ENSMUSG00000045404	Kcnk13	potassium channel, subfamily K, member 13	uc007osi.2;uc007osj.2;uc007osl.2	217826;217826;217826	0;0;0
chr16	92492711	92506564	13854	*	7.75	8.08	7.32	0.76	9.28e-07	1.45e-05	264.42	278.25	170	149.56	Promoter (<=1kb)	16	92498147	92541241	43095	1	209195	uc007zzg.1	0	ENSMUSG00000022949	Clic6	chloride intracellular channel 6	uc007zzg.1;uc007zzf.1	209195;76785	0;0
chr8	77915363	78139092	223730	*	12.22	12.3	12.13	0.17	9.64e-07	1.51e-05	4990.44	5107.78	4513	4446.59	Distal Intergenic	8	78213342	78394326	180985	1	73301	uc009mhx.1	-74250	ENSMUSG00000037101	Ttc29	tetratricopeptide repeat domain 29	NA	NA	NA
chr14	55779465	55796957	17493	*	8.08	8.38	7.69	0.68	9.86e-07	1.54e-05	330.63	334.27	198	216.32	Promoter (<=1kb)	14	55769092	55784019	14928	2	104110	uc007uat.1	0	ENSMUSG00000022220	Adcy4	adenylate cyclase 4	uc007uat.1;uc007uau.1;uc007uav.2;uc007uaw.2;uc011zlp.1	104110;104110;56532;56532;56532	0;0;0;0;0
chr3	58685725	58701270	15546	*	7.89	8.21	7.48	0.73	1.01e-06	1.57e-05	295.87	297.13	193	164.69	Promoter (<=1kb)	3	58674949	58692388	17440	2	20439	uc008pia.1	0	ENSMUSG00000036432	Siah2	siah E3 ubiquitin protein ligase 2	uc008pia.1;uc008pib.2;uc057lfs.1;uc029umf.1	20439;71301;71301;71301	0;0;0;0
chr9	43446336	43462864	16529	*	8.03	8.34	7.64	0.7	1.01e-06	1.58e-05	320.7	325.74	188	210.98	Distal Intergenic	9	43310763	43336125	25363	1	72169	uc009pbi.2	135573	ENSMUSG00000032013	Trim29	tripartite motif-containing 29	NA	NA	NA
chr5	31124397	31139546	15150	*	8	8.31	7.61	0.7	1.03e-06	1.61e-05	324.42	309.3	205	186.05	Promoter (<=1kb)	5	31137989	31138895	907	2	22226	uc008wxe.1	0	ENSMUSG00000038676	Ucn	urocortin	uc056zzb.1;uc057btv.1;uc008wxf.3;uc056zzc.1;uc057btw.1;uc008wxe.1;uc008wxd.2	17527;17527;17527;17527;17527;22226;58522	14634;14634;14744;14744;14744;0;0
chr5	44096121	44104210	8090	*	7.18	7.58	6.63	0.96	1.04e-06	1.61e-05	202.35	180.83	88	109.5	Promoter (<=1kb)	5	43993622	44099224	105603	2	19126	uc008xie.1	0	ENSMUSG00000029086	Prom1	prominin 1	uc012dvv.1;uc012dvw.1;uc008xie.1;uc008xif.2;uc008xig.2;uc008xih.1;uc008xii.1;uc008xij.1;uc008xik.1;uc012dvx.1;uc008xil.1;uc008xim.2	19126;19126;19126;19126;19126;19126;19126;19126;19126;19126;19126;19126	-1353;-1353;0;0;0;0;-1353;-1353;-1353;-1353;0;0
chr6	130767149	130908249	141101	*	11.43	11.31	11.53	-0.22	1.04e-06	1.62e-05	2529.98	2559.06	2973	2943.03	Distal Intergenic	6	131219235	131247362	28128	2	16633	uc009eip.1	339113	ENSMUSG00000030187	Klra2	killer cell lectin-like receptor, subfamily A, member 2	NA	NA	NA
chr11	103646948	103661396	14449	*	7.89	8.21	7.49	0.71	1.05e-06	1.63e-05	298.35	292.86	179	181.6	Promoter (<=1kb)	11	103649509	103650580	1072	1	104582	uc007lvn.1	0	ENSMUSG00000046215	Rprml	reprimo-like	uc007lvn.1;uc007lvm.2;uc056yos.1	104582;78629;78629	0;0;0
chr2	152072755	152092624	19870	*	8.29	8.58	7.93	0.65	1.06e-06	1.64e-05	376.56	390.28	224	263.5	Promoter (<=1kb)	2	152081529	152095802	14274	1	545474	uc012cgb.1	0	ENSMUSG00000060257	Scrt2	scratch family zinc finger 2	uc012cgb.1	545474	0
chr19	46315207	46320267	5061	*	6.59	7.06	5.87	1.2	1.07e-06	1.65e-05	124.55	143.08	51	65.88	Promoter (<=1kb)	19	46312087	46317588	5502	2	73728	uc012bms.1	0	ENSMUSG00000037126	Psd	pleckstrin and Sec7 domain containing	uc008hst.2;uc008hsu.2;uc008hsv.1;uc008hsx.2;uc008hsy.2;uc008hsz.1;uc008hta.1;uc012bms.1;uc008htb.1;uc008htc.1;uc012bmt.1;uc008htd.1	18034;18034;18034;18034;18034;18034;18034;73728;73728;73728;73728;73728	10470;10470;10407;9512;9277;9277;9277;0;0;0;0;0
chr8	105388191	105529506	141316	*	11.43	11.53	11.32	0.22	1.08e-06	1.66e-05	2969.43	2963.96	2552	2551.34	Promoter (<=1kb)	8	105518746	105523988	5243	1	15484	uc009nde.1	0	ENSMUSG00000031891	Hsd11b2	hydroxysteroid 11-beta dehydrogenase 2	uc009ndg.1;uc009nde.1;uc009ndf.1;uc012gjj.1;uc009nda.2;uc012gjk.1;uc009ndb.2;uc009ncy.2;uc009ncz.2;uc009ndc.2;uc012gjl.1;uc009ndd.1	11972;15484;15484;270091;270091;270091;270091;279499;279499;67971;70796;70796	0;0;0;0;0;0;0;0;0;0;0;0
chr8	98699770	98837129	137360	*	11.48	11.37	11.59	-0.22	1.08e-06	1.66e-05	2594.12	2690.58	3127	3029.38	Distal Intergenic	8	99007127	99032740	25614	1	100873092	uc057lxr.1	-169998	ENSMUSG00000089819	Gm15679	predicted gene 15679	NA	NA	NA
chr13	25046938	25066599	19662	*	8.47	8.76	8.13	0.63	1.08e-06	1.66e-05	468.42	395.76	288	270.62	Promoter (<=1kb)	13	25056004	25121523	65520	1	195208	uc007pwv.2	0	ENSMUSG00000035910	Dcdc2a	doublecortin domain containing 2a	uc007pwv.2;uc007pww.2	195208;195208	0;0
chr11	3100119	3200198	100080	*	13.47	13.54	13.39	0.15	1.08e-06	1.67e-05	12134.3	11667.7	10574	10896.2	Promoter (<=1kb)	11	3124021	3131945	7925	1	236604	uc007hrp.2	0	NA	Pisd-ps1	phosphatidylserine decarboxylase, pseudogene 1	uc007hrp.2;uc007hsc.2;uc007hsd.2;uc007hse.2;uc011xqo.1;uc007hsf.2;uc007hrs.1;uc007hrt.1;uc007hru.1;uc007hrv.1;uc007hrw.1;uc007hrx.1;uc007hsa.1;uc007hsb.1	236604;74203;74203;74203;74203;74203;78887;78887;78887;78887;78887;78887;78887;78887	0;-2155;-2385;-2385;-2797;-2821;0;0;0;0;0;0;0;0
chr17	12768120	12775814	7695	*	7.18	7.57	6.63	0.94	1.1e-06	1.69e-05	182.07	199.1	109	89.02	Promoter (<=1kb)	17	12682406	12769706	87301	2	16004	uc008aky.1	0	ENSMUSG00000023830	Igf2r	insulin-like growth factor 2 receptor	uc008akz.2;uc012akd.1;uc008ala.2;uc008alb.2;uc008aky.1	104103;104103;104103;104103;16004	0;0;0;0;0
chr17	44728811	44741406	12596	*	8.11	8.4	7.73	0.67	1.11e-06	1.71e-05	341.39	335.49	222	203.86	Promoter (<=1kb)	17	44603989	44736648	132660	2	12393	uc008cpy.3	0	ENSMUSG00000039153	Runx2	runt related transcription factor 2	uc008cpy.3;uc008cpz.3;uc012aty.2;uc008cqa.3;uc008cqi.3;uc008cqb.3;uc008cqc.3;uc008cqd.2	12393;12393;12393;12393;12393;12393;12393;12393	0;0;0;0;0;0;0;0
chr5	31089383	31098852	9470	*	7.7	8.04	7.26	0.78	1.12e-06	1.71e-05	258.63	268.51	169	137.09	Promoter (<=1kb)	5	31086106	31093527	7422	2	22784	uc008wxa.3	0	ENSMUSG00000029151	Slc30a3	solute carrier family 30 (zinc transporter), member 3	uc008wxa.3	22784	0
chr14	33920802	33932793	11992	*	7.72	8.05	7.28	0.77	1.12e-06	1.72e-05	253.66	277.03	162	149.56	Promoter (<=1kb)	14	33923587	33935285	11699	1	14560	uc007tab.2	0	ENSMUSG00000021943	Gdf10	growth differentiation factor 10	uc007tab.2	14560	0
chr8	99473546	99655896	182351	*	11.9	11.8	11.99	-0.19	1.13e-06	1.73e-05	3590.96	3549.08	4163	3992.59	Intron (uc009mzs.2/234624, intron 1 of 4)	8	99416674	99733438	316765	1	234624	uc009mzs.2	56872	ENSMUSG00000052479	A330008L17Rik	RIKEN cDNA A330008L17 gene	uc009mzs.2	234624	0
chr9	121638687	121648234	9548	*	7.41	7.78	6.91	0.88	1.14e-06	1.74e-05	231.73	208.23	108	131.75	Promoter (<=1kb)	9	121642716	121672954	30239	1	22354	uc009sdl.2	0	ENSMUSG00000032528	Vipr1	vasoactive intestinal peptide receptor 1	uc009sdl.2;uc009sdi.1	22354;69032	0;0
chr14	81700747	81771807	71061	*	10.14	9.96	10.29	-0.33	1.14e-06	1.74e-05	999.74	992.45	1285	1225.82	Distal Intergenic	14	80000302	80021930	21629	1	380924	uc007utn.1	1700445	ENSMUSG00000022026	Olfm4	olfactomedin 4	NA	NA	NA
chr8	63481520	63672563	191044	*	11.94	11.84	12.03	-0.18	1.15e-06	1.75e-05	3687.38	3669.64	4180	4165.29	Distal Intergenic	8	63924694	63952170	27477	2	244495	uc012geg.1	279607	ENSMUSG00000094443	Sgo2b	shugoshin 2B	NA	NA	NA
chr5	135078637	135096796	18160	*	8.02	8.32	7.64	0.69	1.17e-06	1.78e-05	316.14	324.53	192	205.64	Promoter (<=1kb)	5	135072900	135078266	5367	2	194309	uc008zxr.2	-371	ENSMUSG00000043614	Vps37d	vacuolar protein sorting 37D	uc008zxq.2;uc008zxr.2	194309;194309	-371;-371
chr8	96774364	96932627	158264	*	11.61	11.51	11.71	-0.21	1.18e-06	1.79e-05	2931.78	2885.42	3417	3302.68	Distal Intergenic	8	95864137	95888365	24229	2	14719	uc009mzi.1	-885999	ENSMUSG00000031672	Got2	glutamatic-oxaloacetic transaminase 2, mitochondrial	NA	NA	NA
chr6	28120281	28164396	44116	*	9.47	9.66	9.24	0.42	1.19e-06	1.81e-05	794.91	825.01	601	610.68	Promoter (<=1kb)	6	27275121	28126426	851306	2	14823	uc009bcj.1	0	ENSMUSG00000024211	Grm8	glutamate receptor, metabotropic 8	uc009bcj.1;uc009bck.1;uc009bcl.1	14823;14823;14823	0;0;0
chr7	82330200	82343116	12917	*	7.81	8.14	7.38	0.77	1.19e-06	1.81e-05	297.52	267.9	151	181.6	Promoter (<=1kb)	7	82335694	82614448	278755	1	269959	uc009ida.2	0	ENSMUSG00000070469	Adamtsl3	ADAMTS-like 3	uc009ida.2	269959	0
chr7	49905575	49917875	12301	*	7.86	8.18	7.45	0.73	1.23e-06	1.86e-05	303.32	276.43	169	180.71	Promoter (<=1kb)	7	49910299	49959493	49195	1	104245	uc009hbv.3	0	ENSMUSG00000039728	Slc6a5	solute carrier family 6 (neurotransmitter transporter, glycine), member 5	uc009hbv.3;uc012fle.1	104245;104245	0;0
chr12	76395249	76410367	15119	*	8.18	8.47	7.83	0.65	1.23e-06	1.86e-05	358.35	351.32	231	222.55	Promoter (<=1kb)	12	76404176	76406938	2763	1	15512	uc007nyf.2	0	ENSMUSG00000059970	Hspa2	heat shock protein 2	uc007nyf.2;uc011yoa.2	15512;15512	0;0
chr11	98410096	98414964	4869	*	6.24	6.75	5.45	1.31	1.23e-06	1.86e-05	105.11	110.81	40	47.18	Promoter (<=1kb)	11	98412484	98437716	25233	1	13866	uc007lgi.1	0	ENSMUSG00000062312	Erbb2	erb-b2 receptor tyrosine kinase 2	uc007lgi.1	13866	0
chr17	71172733	71188539	15807	*	8.21	8.49	7.85	0.64	1.23e-06	1.86e-05	365.8	354.36	225	235.91	Promoter (<=1kb)	17	71182560	71235119	52560	1	64898	uc008dmb.1	0	ENSMUSG00000024052	Lpin2	lipin 2	uc008dmb.1;uc008dmc.1;uc012awp.1	64898;64898;64898	0;0;0
chr5	100842361	100853592	11232	*	7.61	7.95	7.17	0.78	1.23e-06	1.86e-05	248.28	245.98	143	145.1	Promoter (<=1kb)	5	100846229	100899102	52874	1	231510	uc008yih.1	0	ENSMUSG00000029314	Gpat3	glycerol-3-phosphate acyltransferase 3	uc008yih.1;uc008yii.1;uc008yij.1	231510;231510;231510	0;0;0
chr9	77731966	77757626	25661	*	8.48	8.74	8.16	0.58	1.29e-06	1.94e-05	432.01	424.38	295	275.96	Promoter (<=1kb)	9	77754535	77794489	39955	1	14629	uc009qtm.2	0	ENSMUSG00000032350	Gclc	glutamate-cysteine ligase, catalytic subunit	uc009qtm.2	14629	0
chr4	37838950	37874295	35346	*	9.03	8.75	9.26	-0.51	1.29e-06	1.95e-05	411.73	449.95	651	572.4	Distal Intergenic	4	35706647	36951744	1245098	2	242384	uc008shb.3	-887206	ENSMUSG00000045083	Lingo2	leucine rich repeat and Ig domain containing 2	NA	NA	NA
chr13	27397657	27439680	42024	*	9.33	9.1	9.53	-0.43	1.3e-06	1.95e-05	550.77	544.94	740	733.53	Promoter (<=1kb)	13	27432681	27438688	6008	2	19112	uc007pxo.2	0	ENSMUSG00000021345	Prl8a6	prolactin family 8, subfamily a, member 6	uc007pxo.2;uc007pxp.2;uc007pxq.2;uc033glc.1	19112;19112;19112;19112	0;0;0;0
chr4	134550349	134553142	2794	*	5.63	6.25	4.53	1.72	1.3e-06	1.96e-05	77.38	74.89	16	30.27	Promoter (<=1kb)	4	134537892	134552166	14275	2	74777	uc008vfk.1	0	ENSMUSG00000050989	Selenon	selenoprotein N	uc008vfk.1	74777	0
chr5	76854208	76865579	11372	*	7.77	8.1	7.34	0.76	1.31e-06	1.96e-05	296.7	253.9	167	157.57	Promoter (<=1kb)	5	76857530	76873554	16025	1	320827	uc008xvh.2	0	ENSMUSG00000036377	C530008M17Rik	RIKEN cDNA C530008M17 gene	uc008xvf.2;uc008xvh.2	320827;320827	0;0
chr6	126161235	126166586	5352	*	6.62	7.08	5.93	1.15	1.31e-06	1.97e-05	128.69	141.87	55	66.77	Promoter (<=1kb)	6	126101412	126164960	63549	2	18205	uc009duz.2	0	ENSMUSG00000049107	Ntf3	neurotrophin 3	uc009duz.2;uc012esx.1;uc012esy.1	18205;18205;18205	0;0;0
chr10	127162415	127170588	8174	*	6.91	7.33	6.32	1.01	1.34e-06	2e-05	163.04	158.31	79	81.01	Promoter (<=1kb)	10	127165156	127168523	3368	1	14421	uc007hib.2	0	ENSMUSG00000006731	B4galnt1	beta-1,4-N-acetyl-galactosaminyl transferase 1	uc007hib.2;uc007hic.2;uc007hid.2;uc007hie.2;uc007hif.2;uc007hig.3;uc033fsy.1	14421;14421;14421;14421;14421;14421;216441	0;0;0;0;0;0;10057
chr1	10226679	10241898	15220	*	7.96	8.27	7.57	0.69	1.38e-06	2.07e-05	304.14	311.74	189	192.29	Promoter (<=1kb)	1	10137507	10232670	95164	2	211673	uc007ahn.1	0	ENSMUSG00000067851	Arfgef1	ADP-ribosylation factor guanine nucleotide-exchange factor 1(brefeldin A-inhibited)	uc007ahn.1	211673	0
chr12	4035157	4041232	6076	*	6.76	7.2	6.13	1.07	1.4e-06	2.09e-05	139.45	154.65	72	67.66	Promoter (<=1kb)	12	3962554	4038915	76362	2	668212	uc007mxh.1	0	ENSMUSG00000020658	Efr3b	EFR3 homolog B	uc007mxh.1	668212	0
chr16	17830331	17835671	5341	*	6.87	7.3	6.27	1.03	1.4e-06	2.09e-05	151.04	163.78	82	72.11	Promoter (<=1kb)	16	17833119	17835019	1901	1	433004	uc012abw.1	0	NA	B830017H08Rik	RIKEN cDNA B830017H08 gene	uc007ymi.4;uc012abx.3;uc033gyb.2;uc033gyc.2;uc007ymj.3;uc012abw.1;uc007ymg.1	13356;13356;13356;13356;13356;433004;80733	56057;56057;56057;56057;57797;0;0
chr8	105341287	105380279	38993	*	9.35	9.55	9.12	0.43	1.41e-06	2.11e-05	761.39	741.6	551	565.28	Promoter (<=1kb)	8	105374904	105382862	7959	1	102075	uc009ncv.1	0	ENSMUSG00000014782	Plekhg4	pleckstrin homology domain containing, family G (with RhoGef domain) member 4	uc009ncv.1;uc009ncw.1;uc009ncx.1;uc009nct.2;uc009ncu.1;uc009ncy.2;uc009ncz.2	102075;102075;102075;234686;277973;279499;279499	0;0;-15;0;0;0;0
chr4	146049938	146076881	26944	*	10.64	10.78	10.49	0.28	1.42e-06	2.11e-05	1786.38	1727.35	1472	1413.65	Promoter (<=1kb)	4	146067524	146068718	1195	1	627585	uc008vsj.1	0	NA	Gm13034	SWI/SNF related, matrix associated, actin dependent regulator of chromatin, subfamily a, member 5 pseudogene	uc008vsj.1	627585	0
chr10	117626022	117647890	21869	*	8.4	8.66	8.07	0.6	1.47e-06	2.18e-05	414.63	396.98	271	265.28	Promoter (<=1kb)	10	117629500	117687352	57853	1	70574	uc007hdi.2	0	ENSMUSG00000020183	Cpm	carboxypeptidase M	uc007hdi.2;uc007hdj.2	70574;70574	0;0
chr5	145294304	145327559	33256	*	9.06	9.29	8.79	0.49	1.48e-06	2.19e-05	657.12	594.25	427	461.13	Distal Intergenic	5	145283352	145291469	8118	1	666311	uc012egv.1	10952	ENSMUSG00000070420	Zscan25	zinc finger and SCAN domain containing 25	uc009amt.1;uc012egv.1	666311;666311	10961;10952
chr6	8230807	8257780	26974	*	8.93	9.16	8.65	0.51	1.48e-06	2.19e-05	595.87	550.41	387	418.4	3' UTR	6	8209227	8236274	27048	1	252875	uc009axk.3	21580	ENSMUSG00000042447	Mios	meiosis regulator for oocyte development	uc009axm.3;uc057ach.2;uc012eia.1;uc009axn.3;uc009axk.3;uc009axl.2	100036521;100036521;100036521;170772;252875;68240	-1508;-1508;-1508;0;0;0
chr17	27530161	27540020	9860	*	7.2	7.58	6.69	0.9	1.5e-06	2.22e-05	192	191.79	103	103.26	Distal Intergenic	17	27556574	27563672	7099	1	15361	uc008boy.2	-16554	ENSMUSG00000046711	Hmga1	high mobility group AT-hook 1	NA	NA	NA
chr19	45063305	45083092	19788	*	8.29	8.57	7.93	0.63	1.51e-06	2.24e-05	393.11	365.93	233	256.38	Promoter (<=1kb)	19	45075241	45079289	4049	1	107250	uc008hqs.2	0	ENSMUSG00000025213	Kazald1	Kazal-type serine peptidase inhibitor domain 1	uc008hqs.2;uc008hqt.2	107250;107250	0;0
chr10	80187143	80192745	5603	*	6.82	7.27	6.16	1.11	1.52e-06	2.24e-05	177.11	131.52	76	66.77	3' UTR	10	80179482	80190010	10529	1	13637	uc007gcg.2	7661	ENSMUSG00000003070	Efna2	ephrin A2	uc007gcg.2	13637	0
chr11	83460813	83471476	10664	*	7.67	8	7.24	0.76	1.52e-06	2.24e-05	259.45	252.68	149	154.01	Promoter (<=1kb)	11	83440768	83463040	22273	2	118453	uc007kpa.2	0	ENSMUSG00000020682	Mmp28	matrix metallopeptidase 28 (epilysin)	uc007kpa.2;uc007kpb.2;uc007kpc.2;uc007kpd.2;uc007kpe.1;uc007kpf.1	118453;118453;118453;118453;70439;70439	0;0;0;0;-1632;-1632
chr1	142154623	142188440	33818	*	9.06	8.79	9.28	-0.5	1.54e-06	2.27e-05	454.35	429.25	664	582.2	Distal Intergenic	1	143640697	143649937	9241	1	26878	uc007cwy.2	-1452257	ENSMUSG00000033849	B3galt2	UDP-Gal:betaGlcNAc beta 1,3-galactosyltransferase, polypeptide 2	NA	NA	NA
chr12	102273110	102285788	12679	*	7.61	7.95	7.15	0.8	1.54e-06	2.27e-05	256.56	238.68	128	155.79	Promoter (<=1kb)	12	102283074	102326785	43712	1	217835	uc007oub.1	0	ENSMUSG00000044456	Rin3	Ras and Rab interactor 3	uc007oub.1;uc007ouc.2;uc007oud.2	217835;217835;217835	0;0;0
chr15	23381526	23440199	58674	*	9.73	9.53	9.9	-0.37	1.56e-06	2.29e-05	744.84	737.34	955	961.43	Exon (uc007viq.1/320865, exon 6 of 6)	15	22549022	23382970	833949	1	320865	uc007viq.1	832504	ENSMUSG00000040420	Cdh18	cadherin 18	uc007viq.1;uc007vir.1;uc007vis.1	320865;320865;320865	0;0;0
chr16	75015653	75049916	34264	*	9.01	8.75	9.23	-0.49	1.56e-06	2.3e-05	429.94	429.25	635	569.73	Distal Intergenic	16	75540514	75586061	45548	2	320355	uc007zrn.4	536145	ENSMUSG00000032948	Lipi	lipase, member I	NA	NA	NA
chr9	121328479	121331522	3044	*	5.84	6.42	4.87	1.55	1.59e-06	2.34e-05	99.31	71.85	30	28.49	Intron (uc009sda.1/67095, intron 1 of 11)	9	121297534	121452162	154629	1	67095	uc009sda.1	30945	ENSMUSG00000032536	Trak1	trafficking protein, kinesin binding 1	uc009sda.1;uc009sdb.1;uc009sdc.2;uc009sdd.2	67095;67095;67095;67095	0;0;0;0
chr1	131241364	131248742	7379	*	7.07	7.46	6.52	0.94	1.6e-06	2.35e-05	179.18	173.53	93	90.8	Promoter (<=1kb)	1	131176410	131245178	68769	2	54354	uc007cnd.1	0	ENSMUSG00000026430	Rassf5	Ras association (RalGDS/AF-6) domain family member 5	uc007cnd.1;uc011wro.1	54354;54354	0;0
chr7	78569740	78589563	19824	*	8.2	8.49	7.85	0.63	1.6e-06	2.35e-05	358.35	359.23	229	233.23	Promoter (<=1kb)	7	78192114	78577838	385725	2	18213	uc009hxf.2	0	ENSMUSG00000059146	Ntrk3	neurotrophic tyrosine kinase, receptor, type 3	uc009hxf.2;uc029wmd.1;uc009hxh.3;uc009hxi.2;uc012fnd.1;uc009hxj.1	18213;18213;18213;18213;414121;414121	0;0;0;0;0;0
chr1	62694724	62723851	29128	*	8.83	9.06	8.55	0.52	1.61e-06	2.35e-05	529.25	540.67	358	389.02	Promoter (<=1kb)	1	62703317	62739932	36616	1	18187	uc007bfi.1	0	ENSMUSG00000025969	Nrp2	neuropilin 2	uc007bfi.1;uc007bfj.1;uc007bfk.1;uc007bfl.1;uc007bfm.1;uc007bfn.1;uc007bfo.1	18187;18187;18187;18187;18187;18187;18187	0;0;0;0;0;0;0
chr7	16461278	16480420	19143	*	8.17	8.46	7.81	0.65	1.62e-06	2.36e-05	339.32	365.93	224	225.22	Promoter (<=1kb)	7	16455721	16476780	21060	2	18142	uc009fhv.2	0	ENSMUSG00000001988	Npas1	neuronal PAS domain protein 1	uc009fhv.2	18142	0
chr4	138393079	138400648	7570	*	7.19	7.58	6.66	0.91	1.64e-06	2.4e-05	200.69	181.44	95	107.72	Promoter (<=1kb)	4	138394092	138396458	2367	2	625638	uc008vkx.2	0	ENSMUSG00000078235	Fam43b	family with sequence similarity 43, member B	uc008vkx.2	625638	0
chr8	72642884	72735400	92517	*	10.64	10.78	10.48	0.3	1.65e-06	2.4e-05	1722.24	1792.5	1371	1487.54	Promoter (<=1kb)	8	72723270	72739914	16645	1	20467	uc009mgo.4	0	ENSMUSG00000031622	Sin3b	transcriptional regulator, SIN3B (yeast)	uc009mgo.4;uc009mgp.3;uc009mgq.4;uc012gfz.2;uc012gfx.1;uc009mgk.2;uc009mgl.2;uc009mgm.4;uc009mgn.2;uc012gfy.1	20467;20467;20467;20467;319555;319555;319555;319555;319555;319555	0;0;0;0;0;0;0;0;0;0
chr14	23546822	23572814	25993	*	8.75	9	8.46	0.54	1.65e-06	2.4e-05	509.39	512.67	329	373.89	Promoter (<=1kb)	14	23435950	23554798	118849	2	16531	uc007smj.1	0	ENSMUSG00000063142	Kcnma1	potassium large conductance calcium-activated channel, subfamily M, alpha member 1	uc007sme.3;uc007smg.2;uc007smh.2;uc007smi.2;uc011zgw.2;uc011zgx.2;uc011zgy.2;uc011zgz.2;uc011zha.2;uc011zhc.2;uc011zhd.2;uc011zhe.2;uc057krj.1;uc057krk.1;uc057krl.1;uc057krm.1;uc057krn.1;uc057kro.1;uc011zhf.2;uc011zhg.2;uc011zhh.2;uc011zhi.2;uc011zhj.2;uc007smj.1;uc007smk.1;uc007sml.1	16531;16531;16531;16531;16531;16531;16531;16531;16531;16531;16531;16531;16531;16531;16531;16531;16531;16531;16531;16531;16531;16531;16531;16531;16531;16531	0;0;0;0;0;0;0;0;0;0;0;0;0;0;0;0;0;0;0;0;0;0;0;0;0;-3536
chr5	77015315	77030336	15022	*	7.63	7.97	7.18	0.79	1.65e-06	2.41e-05	248.28	253.29	130	159.35	Promoter (<=1kb)	5	77006442	77018863	12422	2	68246	uc008xvs.2	0	ENSMUSG00000086632	1700112J05Rik	RIKEN cDNA 1700112J05 gene	uc008xvs.2;uc008xvt.1;uc008xvu.1	68246;71868;71868	0;0;0
chr7	35179068	35188299	9232	*	7.6	7.95	7.15	0.8	1.66e-06	2.41e-05	251.59	243.55	126	157.57	Promoter (<=1kb)	7	35186385	35195449	9065	1	53896	uc009gjm.2	0	ENSMUSG00000030495	Slc7a10	solute carrier family 7 (cationic amino acid transporter, y+ system), member 10	uc009gjm.2;uc009gjn.2	53896;53896	0;0
chr9	78389299	78398007	8709	*	7.36	7.73	6.87	0.85	1.66e-06	2.41e-05	219.31	204.58	111	123.74	Promoter (<=1kb)	9	78395777	78423589	27813	1	100048658	uc012gxe.1	0	ENSMUSG00000070291	Ddx43	DEAD (Asp-Glu-Ala-Asp) box polypeptide 43	uc012gxe.1	100048658	0
chr8	92595130	92813834	218705	*	12.05	12.14	11.96	0.18	1.66e-06	2.41e-05	4501.32	4503.78	3916	4046	Promoter (<=1kb)	8	92674289	92680956	6668	1	64379	uc009muc.2	0	ENSMUSG00000031738	Irx6	Iroquois homeobox 6	uc009muc.2;uc009mud.2	64379;64379	0;0
chr18	74439230	74447798	8569	*	7.36	7.74	6.85	0.89	1.66e-06	2.41e-05	215.18	213.1	134	97.03	Promoter (<=1kb)	18	74442619	74659060	216442	1	17919	uc008fpo.1	0	ENSMUSG00000025885	Myo5b	myosin VB	uc008fpo.1;uc008fpp.1	17919;17919	0;0
chr14	96319849	96390907	71059	*	10.16	9.99	10.32	-0.33	1.71e-06	2.47e-05	1041.95	990.63	1294	1260.54	Exon (uc007uuq.1/93688, exon 2 of 11)	14	96105265	96519034	413770	2	93688	uc007uuq.1	128127	ENSMUSG00000022076	Klhl1	kelch-like 1	uc007uuq.1	93688	0
chr4	128869493	128889449	19957	*	8.12	8.42	7.76	0.66	1.71e-06	2.47e-05	335.18	347.66	206	226.11	Promoter (<=1kb)	4	128884140	128911326	27187	1	67525	uc008uvo.1	0	ENSMUSG00000041000	Trim62	tripartite motif-containing 62	uc008uvo.1	67525	0
chr6	127761752	127775054	13303	*	7.72	8.05	7.3	0.75	1.72e-06	2.48e-05	273.11	256.33	149	165.58	Promoter (<=1kb)	6	127689009	127769159	80151	2	381813	uc009dwb.2	0	ENSMUSG00000030350	Prmt8	protein arginine N-methyltransferase 8	uc009dwc.2;uc009dwb.2	100504457;381813	3611;0
chr13	71502933	71516943	14011	*	7.79	8.11	7.36	0.75	1.73e-06	2.5e-05	296.7	257.55	175	154.01	Intron (uc007rdc.1/uc007rdc.1, intron 1 of 1)	13	71107089	71107209	121	1	100316804	uc056yue.1	395844	ENSMUSG00000080580	Mir466f-4	microRNA 466f-4	NA	NA	NA
chr5	136879748	136889979	10232	*	7.44	7.79	6.96	0.83	1.79e-06	2.58e-05	220.14	222.84	117	132.64	Promoter (<=1kb)	5	136741764	136883107	141344	2	140709	uc009aay.1	0	ENSMUSG00000004415	Col26a1	collagen, type XXVI, alpha 1	uc009aay.1;uc009aaz.1;uc009aba.1;uc009abb.1	140709;140709;140709;140709	0;0;0;0
chr2	92051571	92065322	13752	*	8.08	8.38	7.71	0.67	1.8e-06	2.59e-05	328.97	337.31	223	196.74	5' UTR	2	91982328	92024170	41843	2	26427	uc008kxf.1	-27401	ENSMUSG00000027230	Creb3l1	cAMP responsive element binding protein 3-like 1	NA	NA	NA
chr19	60460098	60471354	11257	*	7.63	7.96	7.2	0.76	1.8e-06	2.59e-05	250.76	247.2	146	147.77	Promoter (<=1kb)	19	60466733	60468304	1572	2	226278	uc008ibu.2	0	ENSMUSG00000045052	Prlhr	prolactin releasing hormone receptor	uc008ibu.2	226278	0
chr18	15056472	15072172	15701	*	8.16	8.45	7.79	0.66	1.81e-06	2.6e-05	348.01	351.32	239	204.75	Promoter (<=1kb)	18	14968685	15063582	94898	2	106931	uc008edn.2	0	ENSMUSG00000036225	Kctd1	potassium channel tetramerisation domain containing 1	uc008edn.2;uc008edo.1;uc008edp.2	106931;106931;106931	0;0;0
chr10	115442939	115507471	64533	*	10.01	10.17	9.82	0.34	1.84e-06	2.64e-05	1174.37	1125.79	897	915.13	3' UTR	10	115450314	115587780	137467	2	14160	uc007hbi.1	80309	ENSMUSG00000020140	Lgr5	leucine rich repeat containing G protein coupled receptor 5	uc007hbi.1;uc007hbj.1;uc007hbk.1	14160;14160;14160	0;0;0
chr4	97742226	97763274	21049	*	8.52	8.79	8.2	0.59	1.86e-06	2.66e-05	467.59	415.86	283	304.45	Exon (uc008ttr.1/uc008ttr.1, exon 1 of 2)	4	97581943	98118876	536934	1	18027	uc008tty.2	160283	ENSMUSG00000028565	Nfia	nuclear factor I/A	uc008tty.2;uc008ttp.1	18027;319865	0;0
chr8	25878884	25989283	110400	*	11.08	11.19	10.95	0.24	1.89e-06	2.7e-05	2323.49	2349.01	1979	1978.04	Promoter (<=1kb)	8	25911680	25934517	22838	1	16532	uc009lhf.1	0	ENSMUSG00000031576	Kcnu1	potassium channel, subfamily U, member 1	uc009lhe.1;uc009lhf.1;uc009lhg.1;uc009lhh.1	16532;16532;52120;74653	0;0;0;0
chr2	103559398	103570572	11175	*	7.57	7.91	7.13	0.78	1.95e-06	2.78e-05	242.07	238.68	134	145.99	Promoter (<=1kb)	2	103566310	103718423	152114	1	99382	uc008lix.1	0	ENSMUSG00000032724	Abtb2	ankyrin repeat and BTB (POZ) domain containing 2	uc008lix.1	99382	0
chr5	108353647	108382073	28427	*	8.91	9.15	8.62	0.52	1.97e-06	2.81e-05	574.36	560.77	360	429.08	5' UTR	5	108388373	108431743	43371	1	18587	uc008ynz.2	-6300	ENSMUSG00000029491	Pde6b	phosphodiesterase 6B, cGMP, rod receptor, beta polypeptide	uc008ynu.2;uc008ynv.2	433931;433931	40722;40722
chr16	67430186	67476452	46267	*	9.45	9.22	9.64	-0.42	1.98e-06	2.82e-05	593.8	600.34	837	759.35	Intron (uc007zqn.2/239857, intron 1 of 9)	16	66655421	67620908	965488	2	239857	uc007zqn.2	144456	ENSMUSG00000064115	Cadm2	cell adhesion molecule 2	uc007zqn.2;uc007zqo.2;uc057kvt.1	239857;239857;239857	0;0;0
chr11	50594228	50606161	11934	*	7.66	7.99	7.23	0.76	2.01e-06	2.86e-05	264.42	245.37	142	158.46	Promoter (<=1kb)	11	50602085	50807573	205489	1	216725	uc007iso.2	0	ENSMUSG00000036545	Adamts2	a disintegrin-like and metallopeptidase (reprolysin type) with thrombospondin type 1 motif, 2	uc007iso.2;uc057ayg.1	216725;216725	0;0
chr5	118023967	118039073	15107	*	7.93	8.24	7.55	0.69	2.02e-06	2.88e-05	303.32	300.78	178	195.85	Promoter (<=1kb)	5	118027824	118061870	34047	1	57816	uc008zgc.1	0	ENSMUSG00000029359	Tesc	tescalcin	uc008zgc.1;uc012ecj.1;uc008zgd.1	57816;57816;57816	0;0;0
chr1	156198938	156209868	10931	*	7.59	7.93	7.14	0.79	2.06e-06	2.93e-05	241.25	245.37	155	126.41	Promoter (<=1kb)	1	156075956	156205026	129071	2	329274	uc033fmn.1	0	ENSMUSG00000015484	Fam163a	family with sequence similarity 163, member A	uc033fmn.1	329274	0
chr15	82271959	82279503	7545	*	7.1	7.49	6.56	0.92	2.08e-06	2.96e-05	185.8	172.92	93	96.14	Promoter (<=1kb)	15	82274935	82294442	19508	1	24050	uc007wyq.1	0	ENSMUSG00000022456	2020-09-03	septin 3	uc007wyq.1;uc007wyr.1;uc007wys.1;uc007wyt.1;uc007wyu.1	24050;24050;24050;24050;24050	0;0;0;0;-3446
chr8	52910342	52956403	46062	*	9.9	9.71	10.06	-0.35	2.09e-06	2.97e-05	831.33	846.32	1094	1045.11	Distal Intergenic	8	52356611	52403339	46729	1	330767	uc009lry.1	553731	ENSMUSG00000110013	1190028D05Rik	RIKEN cDNA 1190028D05 gene	NA	NA	NA
chr19	10455433	10467168	11736	*	7.65	7.99	7.2	0.79	2.09e-06	2.97e-05	247.45	259.99	131	162.91	Promoter (<=1kb)	19	10455371	10457447	2077	2	278795	uc012bio.2	0	ENSMUSG00000090291	Lrrc10b	leucine rich repeat containing 10B	uc012bio.2;uc008gpp.2;uc008gpq.2;uc012bin.1	278795;54525;54525;54525	0;66343;66343;66343
chr8	104240219	104373155	132937	*	11.27	11.38	11.15	0.23	2.09e-06	2.97e-05	2722.81	2599.25	2284	2250.45	Promoter (<=1kb)	8	104281042	104310081	29040	2	100504164	uc009nai.1	0	ENSMUSG00000110430	Cmtm1	CKLF-like MARVEL transmembrane domain containing 1	uc009nai.1;uc012gix.1;uc009naa.2;uc009nab.2;uc009nam.1;uc009nah.1;uc009naj.1;uc009nac.2;uc009nad.2;uc009nae.2;uc009naf.2;uc009nag.2;uc009nal.2;uc009nan.3	100504164;100504164;57813;57813;68119;73381;73381;75458;75458;75458;75458;75458;75502;97487	0;0;0;0;0;0;0;0;0;0;0;0;0;0
chr2	165107990	165116210	8221	*	6.97	7.37	6.4	0.97	2.1e-06	2.98e-05	161.8	169.87	82	87.24	3' UTR	2	165111507	165181459	69953	2	104010	uc012cjh.1	65249	ENSMUSG00000053166	Cdh22	cadherin 22	uc012cjh.1;uc008nxc.2	104010;104010	0;0
chr11	5055499	5068060	12562	*	7.67	7.99	7.24	0.75	2.11e-06	2.98e-05	259.87	250.24	144	158.46	Promoter (<=1kb)	11	5058128	5060383	2256	1	75668	uc007hvs.1	0	ENSMUSG00000034209	Rasl10a	RAS-like, family 10, member A	uc007hvw.2;uc007hvx.2;uc007hvy.2;uc007hvs.1;uc007hvq.2;uc007hvr.2;uc007hvu.2;uc007hvv.2;uc007hvt.2	14030;14030;14030;75668;78926;78926;78926;78926;78926	31028;31028;31028;0;0;0;0;0;0
chr8	117007691	117056033	48343	*	9.78	9.96	9.58	0.38	2.14e-06	3.02e-05	975.33	1021.07	731	800.3	Promoter (<=1kb)	8	117009323	117024091	14769	2	76645	uc012glj.1	0	ENSMUSG00000034416	Pkd1l2	polycystic kidney disease 1 like 2	uc012gli.1;uc012glj.1;uc012glk.1;uc009nov.1	76645;76645;76645;76645	0;0;0;0
chr16	34561579	34580184	18606	*	8.33	8.6	8	0.61	2.14e-06	3.02e-05	396.42	380.54	247	263.5	Distal Intergenic	16	34152025	34514027	362003	2	545156	uc007zax.2	-47552	ENSMUSG00000061751	Kalrn	kalirin, RhoGEF kinase	NA	NA	NA
chr11	97568056	97590216	22161	*	8.03	8.32	7.65	0.67	2.19e-06	3.08e-05	322.76	317.83	190	211.87	Promoter (<=1kb)	11	97509340	97575126	65787	2	56013	uc007lee.1	0	ENSMUSG00000038453	Srcin1	SRC kinase signaling inhibitor 1	uc007lee.1	56013	0
chrX	126770292	126780945	10654	*	7.97	7.58	8.28	-0.7	2.22e-06	3.13e-05	195.73	185.7	340	280.42	Distal Intergenic	20	126812462	126834004	21543	2	237029	uc029xmp.1	53059	ENSMUSG00000058670	4932411N23Rik	RIKEN cDNA 4932411N23 gene	NA	NA	NA
chr11	95007878	95012539	4662	*	6.31	6.81	5.55	1.26	2.25e-06	3.16e-05	103.86	120.56	52	41.84	Promoter (<=1kb)	11	95009879	95026087	16209	1	217125	uc007kzt.1	0	ENSMUSG00000047181	Samd14	sterile alpha motif domain containing 14	uc007kzr.2;uc007kzs.2;uc007kzt.1	217124;217124;217125	16666;11814;0
chr14	90303091	90338817	35727	*	9.28	9.04	9.48	-0.43	2.26e-06	3.17e-05	530.08	525.45	739	686.35	Distal Intergenic	14	90126891	90269760	142870	1	74967	uc029smh.1	176200	ENSMUSG00000115001	4930474H20Rik	RIKEN cDNA 4930474H20 gene	NA	NA	NA
chr3	54754021	54758543	4523	*	6.32	6.83	5.52	1.31	2.27e-06	3.19e-05	110.48	116.9	58	33.83	Promoter (<=1kb)	3	54755582	54801269	45688	1	55994	uc008pfv.2	0	ENSMUSG00000027796	Smad9	SMAD family member 9	uc008pfv.2;uc008pft.1;uc008pfu.1	55994;66248;66248	0;18482;18482
chr2	133550575	133558568	7994	*	7.29	7.66	6.8	0.86	2.29e-06	3.2e-05	199.04	204.58	107	115.73	Promoter (<=1kb)	2	133552159	133562896	10738	1	12156	uc008mnr.2	0	ENSMUSG00000027358	Bmp2	bone morphogenetic protein 2	uc008mnr.2	12156	0
chr11	104122384	104139912	17529	*	8.17	8.47	7.79	0.69	2.35e-06	3.3e-05	326.49	384.8	206	235.91	Promoter (<=1kb)	11	104132781	104175523	42743	1	12921	uc007lvz.2	0	ENSMUSG00000018634	Crhr1	corticotropin releasing hormone receptor 1	uc007lvz.2;uc007lwa.3;uc011yfy.2	12921;12921;12921	0;0;0
chr14	49806221	49817874	11654	*	7.46	7.8	7	0.8	2.37e-06	3.31e-05	230.07	216.76	129	127.3	Distal Intergenic	14	49682019	49783367	101349	2	67419	uc007tkk.2	-22854	ENSMUSG00000036242	Armh4	armadillo-like helical domain containing 4	NA	NA	NA
chr9	95381967	95412922	30956	*	8.92	9.15	8.65	0.49	2.39e-06	3.33e-05	577.25	555.29	420	385.46	Promoter (<=1kb)	9	95400926	95407270	6345	2	54371	uc009raz.2	0	ENSMUSG00000033350	Chst2	carbohydrate sulfotransferase 2	uc009raz.2	54371	0
chr14	93548563	93610592	62030	*	10.04	9.86	10.2	-0.34	2.47e-06	3.44e-05	889.26	963.84	1186	1162.61	Exon (uc007uum.2/211712, exon 2 of 4)	14	93013700	93888888	875189	2	211712	uc007uum.2	278296	ENSMUSG00000055421	Pcdh9	protocadherin 9	uc007uum.2;uc011zpc.2;uc057kth.1;uc007uun.2;uc007uuo.2	211712;211712;211712;211712;211712	0;0;0;0;0
chr12	84639422	84659323	19902	*	8.29	8.57	7.94	0.63	2.49e-06	3.47e-05	395.18	362.28	232	259.05	Promoter (<=1kb)	12	84641019	84651455	10437	1	432677	uc011ypa.1	0	ENSMUSG00000071235	Vrtn	vertebrae development associated	uc011ypa.1;uc011ypb.1;uc007ofq.1	432677;432677;432677	0;0;0
chr10	43158132	43179593	21462	*	8.63	8.87	8.33	0.54	2.51e-06	3.49e-05	460.56	475.52	318	325.82	Promoter (<=1kb)	10	43002500	43174530	172031	2	109205	uc007ezf.1	0	ENSMUSG00000038248	Sobp	sine oculis binding protein	uc007ezf.1;uc007ezg.1;uc011xdj.2	109205;109205;74530	0;0;0
chr6	53266198	53295961	29764	*	8.92	9.14	8.66	0.48	2.53e-06	3.51e-05	563.6	568.07	402	407.72	Promoter (<=1kb)	6	53287303	53391409	104107	1	231991	uc009bzd.3	0	ENSMUSG00000053007	Creb5	cAMP responsive element binding protein 5	uc009bzd.3;uc009bze.3;uc009bzf.3;uc057lqj.1	231991;231991;231991;231991	0;0;0;0
chr10	109219112	109287942	68831	*	10.02	9.83	10.18	-0.35	2.54e-06	3.53e-05	938.91	887.12	1191	1128.79	Distal Intergenic	10	108497650	109010975	513326	2	20979	uc007gzi.2	-208137	ENSMUSG00000035864	Syt1	synaptotagmin I	NA	NA	NA
chr14	97421419	97512750	91332	*	10.63	10.48	10.77	-0.29	2.55e-06	3.54e-05	1414.78	1445.45	1810	1676.26	Distal Intergenic	14	97786846	98169765	382920	2	13134	uc007uur.2	657015	ENSMUSG00000055639	Dach1	dachshund family transcription factor 1	NA	NA	NA
chr13	114447031	114474686	27656	*	8.86	9.09	8.59	0.5	2.56e-06	3.54e-05	560.29	529.71	398	373	Promoter (<=1kb)	13	114452262	114458951	6690	2	14313	uc007rxn.2	0	ENSMUSG00000021765	Fst	follistatin	uc007rxn.2;uc007rxo.2;uc007rxp.2	14313;14313;14313	0;0;0
chr11	102438893	102457641	18749	*	7.99	8.28	7.61	0.67	2.61e-06	3.62e-05	322.76	300.17	199	192.29	Promoter (<=1kb)	11	102436981	102447663	10683	2	217219	uc007lrw.2	0	ENSMUSG00000034685	Fam171a2	family with sequence similarity 171, member A2	uc007lrv.2;uc007lrx.2;uc007lry.2;uc007lrz.1;uc007lsa.1;uc007lrw.2	14824;16399;16399;16399;16399;217219	8571;0;0;0;0;0
chr6	9230334	9277913	47580	*	9.65	9.45	9.82	-0.37	2.63e-06	3.64e-05	694.77	703.85	918	893.77	3' UTR	6	8948614	9248578	299965	1	18231	uc009ayb.1	281720	ENSMUSG00000046178	Nxph1	neurexophilin 1	uc009ayb.1;uc009ayc.1	18231;18231	0;0
chr7	81212472	81217302	4831	*	6.56	7.02	5.89	1.13	2.67e-06	3.69e-05	138.21	120.56	56	62.31	Promoter (<=1kb)	7	81213804	81333622	119819	1	18584	uc009ibt.1	0	ENSMUSG00000025584	Pde8a	phosphodiesterase 8A	uc009ibt.1	18584	0
chr12	98568158	98583141	14984	*	8.13	8.41	7.77	0.64	2.68e-06	3.7e-05	352.14	329.4	212	224.33	Promoter (<=1kb)	12	98429437	98574712	145276	2	72258	uc007oqg.2	0	ENSMUSG00000033854	Kcnk10	potassium channel, subfamily K, member 10	uc007oqg.2;uc007oqh.2;uc007oqi.2;uc057bck.1	72258;72258;72258;72258	0;0;0;0
chr3	18045711	18061218	15508	*	8.27	8.54	7.93	0.61	2.7e-06	3.72e-05	365.39	379.32	252	235.02	Promoter (<=1kb)	3	18054325	18057514	3190	1	59058	uc008orl.2	0	ENSMUSG00000025128	Bhlhe22	basic helix-loop-helix family, member e22	uc008orl.2	59058	0
chr6	15122885	15157358	34474	*	9.01	8.77	9.23	-0.46	2.7e-06	3.72e-05	431.18	438.99	608	589.32	Intron (uc009ayx.1/114142, intron 3 of 4)	6	14901349	15287750	386402	1	114142	uc009ayx.1	221536	ENSMUSG00000029563	Foxp2	forkhead box P2	uc009ayx.1;uc009ayy.1;uc009ayz.1	114142;114142;114142	0;0;0
chr5	112575737	112578378	2642	*	5.92	6.48	5.02	1.46	2.7e-06	3.72e-05	99.73	78.54	38	26.71	Promoter (<=1kb)	5	112419151	112577198	158048	2	56747	uc008ytk.2	0	ENSMUSG00000058153	Sez6l	seizure related 6 homolog like	uc008ytk.2;uc008ytl.2;uc012ebi.2;uc008ytm.1;uc012ebk.1	56747;56747;56747;67325;67325	0;0;0;11618;11618
chr8	66110187	66253958	143772	*	11.55	11.44	11.65	-0.21	2.71e-06	3.73e-05	2724.88	2845.23	3217	3207.42	5' UTR	8	65618040	66471637	853598	1	72925	uc009lvj.2	492147	ENSMUSG00000036469	2020-03-01	membrane-associated ring finger (C3HC4) 1	uc009lvj.2;uc009lvk.2;uc009lvl.2	72925;72925;72925	0;0;0
chr3	53632161	53670202	38042	*	9.34	9.53	9.11	0.42	2.73e-06	3.76e-05	739.88	741.6	544	563.5	Promoter (<=1kb)	3	53513938	53657355	143418	2	242022	uc008pey.1	0	ENSMUSG00000037016	Frem2	Fras1 related extracellular matrix protein 2	uc008pey.1	242022	0
chr2	180884968	180894412	9445	*	7.35	7.72	6.86	0.85	2.74e-06	3.76e-05	201.93	218.58	128	105.04	Promoter (<=1kb)	2	180894040	180894107	68	1	723951	uc012cmf.1	0	ENSMUSG00000065454	Mir124a-3	microRNA 124a-3	uc012cmf.1	723951	0
chr2	119751411	119761413	10003	*	7.57	7.9	7.13	0.77	2.75e-06	3.77e-05	233.8	244.76	147	133.53	Promoter (<=1kb)	2	119751326	119758525	7200	2	17005	uc008lug.1	0	ENSMUSG00000027297	Ltk	leukocyte tyrosine kinase	uc008lug.1;uc008luh.2;uc008lui.1;uc008luj.1;uc008luf.1;uc008lum.2;uc008luk.2;uc008lul.2	17005;17005;17005;17005;228550;68925;68925;68925	0;0;0;0;9074;26099;26124;26124
chr7	141460947	141466165	5219	*	6.61	7.06	5.96	1.1	2.79e-06	3.82e-05	126.62	140.04	64	60.53	Promoter (<=1kb)	7	141461094	141466602	5509	1	213573	uc009klj.2	0	ENSMUSG00000048200	Cracr2b	calcium release activated channel regulator 2B	uc012fxf.1;uc012fxg.1;uc012fxh.1;uc009kll.2;uc009klj.2;uc009klg.2;uc009klh.2;uc009kli.2;uc012fxe.1	100126795;12476;12476;12476;213573;66853;66853;66853;66853	0;-1197;-1197;-2624;0;5759;5759;5759;5759
chr15	13149509	13187762	38254	*	9.27	9.48	9.04	0.44	2.8e-06	3.83e-05	714.22	712.37	557	493.18	Promoter (<=1kb)	15	13028699	13173675	144977	2	12563	uc007vif.2	0	ENSMUSG00000039385	Cdh6	cadherin 6	uc007vif.2;uc007vig.2	12563;12563	0;0
chr5	105713605	105723967	10363	*	7.33	7.69	6.84	0.85	2.81e-06	3.84e-05	216.83	195.45	110	119.29	Intron (uc008ylg.2/231549, intron 1 of 2)	5	105699969	105815215	115247	1	231549	uc008ylg.2	13636	ENSMUSG00000046079	Lrrc8d	leucine rich repeat containing 8D	uc008ylg.2;uc008ylh.2	231549;231549	0;0
chr6	65014235	65020347	6113	*	6.71	7.15	6.07	1.08	2.82e-06	3.85e-05	156.42	127.86	67	67.66	Distal Intergenic	6	65042667	65044201	1535	1	13990	uc009cec.4	-22320	ENSMUSG00000029920	Smarcad1	SWI/SNF-related, matrix-associated actin-dependent regulator of chromatin, subfamily a, containing DEAD/H box 1	NA	NA	NA
chr2	164937423	164960604	23182	*	8.4	8.66	8.07	0.58	2.82e-06	3.85e-05	417.94	390.28	271	267.95	Promoter (<=1kb)	2	164948219	164955850	7632	1	17395	uc008nwt.3	0	ENSMUSG00000017737	Mmp9	matrix metallopeptidase 9	uc008nwt.3;uc012cjf.2;uc056zqu.1	17395;57138;57138	0;0;0
chr7	4985009	5005035	20027	*	8.27	8.55	7.92	0.62	2.83e-06	3.85e-05	373.66	373.84	225	259.94	Promoter (<=1kb)	7	4992852	4996101	3250	2	68490	uc009ezc.1	0	ENSMUSG00000051550	Zfp579	zinc finger protein 579	uc009eze.2;uc012exb.1;uc009ezf.2;uc009ezg.2;uc009ezh.2;uc009ezc.1;uc009ezd.1	23877;23877;23877;23877;23877;68490;68490	8207;9168;9218;9662;9693;0;0
chr12	111483485	111489936	6452	*	7.06	7.45	6.52	0.93	2.84e-06	3.86e-05	169.66	179.62	87	96.14	Promoter (<=1kb)	12	111484609	111485823	1215	2	212539	uc007pdc.2	0	ENSMUSG00000010529	Gm266	predicted gene 266	uc007pdc.2	212539	0
chr13	56285922	56299669	13748	*	7.82	8.14	7.4	0.74	2.84e-06	3.86e-05	266.9	296.52	156	182.49	Promoter (<=1kb)	13	56288643	56296551	7909	2	57266	uc007qsm.2	0	ENSMUSG00000021508	Cxcl14	chemokine (C-X-C motif) ligand 14	uc007qsm.2;uc011zab.2	57266;57266	0;0
chr5	127230799	127246851	16053	*	8.17	8.47	7.79	0.67	2.85e-06	3.87e-05	365.39	342.18	196	247.48	Promoter (<=1kb)	5	127241826	127565790	323965	1	208213	uc008zry.2	0	ENSMUSG00000034324	Tmem132c	transmembrane protein 132C	uc008zry.2	208213	0
chr7	139183193	139191736	8544	*	7.11	7.49	6.59	0.9	2.9e-06	3.94e-05	179.59	179.62	97	95.25	Promoter (<=1kb)	7	139103638	139188494	84857	2	57740	uc009kfl.2	0	ENSMUSG00000015981	Stk32c	serine/threonine kinase 32C	uc009kfl.2;uc012fvt.1	57740;57740	0;0
chr10	94941183	94958278	17096	*	8.04	8.33	7.68	0.66	2.91e-06	3.94e-05	317.8	326.96	198	210.98	Promoter (<=1kb)	10	94790866	94944578	153713	2	54712	uc007gvz.3	0	ENSMUSG00000074785	Plxnc1	plexin C1	uc007gvz.3	54712	0
chr2	127652807	127658586	5780	*	6.92	7.33	6.35	0.98	2.91e-06	3.94e-05	165.93	155.87	76	87.24	Promoter (<=1kb)	2	127633226	127656695	23470	2	17153	uc008mfv.2	0	ENSMUSG00000027375	Mal	myelin and lymphocyte protein, T cell differentiation protein	uc008mfv.2;uc008mfw.2	17153;17153	0;0
chr8	94476817	94548139	71323	*	10.22	10.37	10.04	0.33	2.92e-06	3.95e-05	1301.4	1350.46	1007	1102.08	Promoter (<=1kb)	8	94505046	94505105	60	1	102466800	uc033jgv.1	0	ENSMUSG00000098511	Mir7072	microRNA 7072	uc033jgv.1;uc009mwl.1;uc009mwm.1;uc012gip.1;uc012gio.1;uc009mwj.2	102466800;234577;234577;234577;434341;434341	0;0;0;0;0;0
chr8	123477329	123536875	59547	*	9.97	10.14	9.78	0.36	2.98e-06	4.03e-05	1110.23	1148.93	828	929.38	Promoter (<=1kb)	8	123518835	123528322	9488	1	104346	uc009nwj.1	0	ENSMUSG00000040220	Gas8	growth arrest specific 8	uc057ang.1;uc009nwj.1;uc009nwk.1;uc009nwc.2;uc009nwd.2;uc009nwe.2;uc009nwf.1;uc009nwg.1;uc009nwh.2;uc009nwi.2;uc012gms.1	100861480;104346;104346;114896;114896;114896;114896;114896;72185;72185;72185	2029;0;0;0;0;0;0;0;0;0;0
chr8	70783010	70811481	28472	*	9.01	9.23	8.75	0.48	2.99e-06	4.04e-05	578.49	625.91	415	445.99	Promoter (<=1kb)	8	70798135	70798192	58	1	102466823	uc033jfz.1	0	ENSMUSG00000099031	Mir7240	microRNA 7240	uc033jfz.1;uc009mbr.3;uc012gfh.1;uc009mbp.2;uc009mbq.1	102466823;16161;546071;546071;546071	0;0;0;0;0
chr15	98630654	98635856	5203	*	6.06	6.6	5.2	1.4	3.07e-06	4.14e-05	93.93	99.85	28	45.4	Promoter (<=1kb)	15	98632328	98644536	12209	1	12297	uc007xnb.2	0	ENSMUSG00000003352	Cacnb3	calcium channel, voltage-dependent, beta 3 subunit	uc007xnb.2;uc007xnc.2;uc011zza.2;uc007xnd.2	12297;12297;12297;12297	0;0;0;-3632
chr6	115989547	115996738	7192	*	6.89	7.3	6.3	0.99	3.09e-06	4.16e-05	148.55	166.22	77	81.01	Promoter (<=1kb)	6	115954811	115995005	40195	2	67784	uc009djn.1	0	ENSMUSG00000030123	Plxnd1	plexin D1	uc009djn.1	67784	0
chr16	77539896	77590996	51101	*	9.6	9.38	9.79	-0.41	3.15e-06	4.24e-05	676.98	656.36	942	826.11	Exon (uc007zse.1/77994, exon 7 of 8)	16	77236317	77598531	362215	1	77994	uc007zse.1	303579	ENSMUSG00000090386	Mir99ahg	Mir99a and Mirlet7c-1 host gene (non-protein coding)	uc007zse.1;uc007zsf.2;uc007zsg.2;uc007zsh.2;uc007zsi.2;uc007zsj.2;uc007zsk.1	77994;77994;77994;77994;77994;77994;77994	0;0;0;0;0;0;0
chr10	50888318	50939811	51494	*	9.91	10.08	9.72	0.36	3.18e-06	4.28e-05	1113.54	1050.9	882	803.86	Promoter (<=1kb)	10	50895651	50989152	93502	1	20464	uc007fal.1	0	ENSMUSG00000019913	Sim1	single-minded family bHLH transcription factor 1	uc007fal.1	20464	0
chr16	4798838	4827982	29145	*	8.97	9.2	8.7	0.49	3.25e-06	4.36e-05	621.94	551.02	422	412.17	Distal Intergenic	16	4835416	4852129	16714	1	78809	uc007yam.1	-7434	ENSMUSG00000022518	4930562C15Rik	RIKEN cDNA 4930562C15 gene	NA	NA	NA
chr16	8548295	8565454	17160	*	8.38	8.65	8.06	0.59	3.28e-06	4.4e-05	417.52	384.19	275	258.16	Intron (uc007ycm.2/268860, intron 1 of 2)	16	8513429	8580942	67514	1	268860	uc007ycm.2	34866	ENSMUSG00000057880	Abat	4-aminobutyrate aminotransferase	uc007ycm.2;uc007ycn.2;uc007yco.3;uc007ycp.3	268860;268860;268860;268860	0;0;0;0
chr4	150025658	150035380	9723	*	7.48	7.82	7.03	0.79	3.3e-06	4.43e-05	223.04	229.54	122	138.87	Distal Intergenic	4	149979474	150009023	29550	2	100198	uc008vxi.2	-16635	ENSMUSG00000028980	H6pd	hexose-6-phosphate dehydrogenase (glucose 1-dehydrogenase)	NA	NA	NA
chr2	65230700	65246397	15698	*	8.03	8.33	7.65	0.68	3.31e-06	4.44e-05	312.01	329.4	219	182.49	Promoter (<=1kb)	2	65088339	65238489	150151	2	319876	uc008jwb.2	0	ENSMUSG00000034903	Cobll1	Cobl-like 1	uc008jwb.2;uc008jvz.2;uc008jwa.2;uc008jwc.2;uc008jwd.2;uc008jwe.1;uc008jwf.1;uc008jwg.1;uc008jwh.1	319876;319876;319876;319876;319876;319876;319876;319876;319876	0;0;0;0;0;0;0;0;0
chr8	93584513	93852984	268472	*	12.4	12.48	12.32	0.16	3.33e-06	4.45e-05	5721.21	5686.81	5003	5214.85	Promoter (<=1kb)	8	93707015	93719975	12961	2	108167546	uc009mvi.1	0	NA	Gm30606	predicted gene, 30606	uc009mvi.1;uc009mvj.1;uc009mvk.2;uc009mvl.1;uc009mvm.1;uc012gil.1	108167546;14681;14681;14681;14681;75809	0;0;0;0;0;0
chr8	52846025	52901761	55737	*	10.16	10	10.31	-0.32	3.34e-06	4.47e-05	1022.09	1021.07	1311	1236.5	Distal Intergenic	8	52356611	52403339	46729	1	330767	uc009lry.1	489414	ENSMUSG00000110013	1190028D05Rik	RIKEN cDNA 1190028D05 gene	NA	NA	NA
chr5	38310261	38328246	17986	*	8.19	8.48	7.84	0.64	3.35e-06	4.47e-05	372.01	339.75	217	241.25	Promoter (<=1kb)	5	38319509	38322523	3015	1	13492	uc008xgn.2	0	ENSMUSG00000039358	Drd5	dopamine receptor D5	uc008xgn.2	13492	0
chr17	21354810	21389113	34304	*	9.26	9.46	9.03	0.43	3.39e-06	4.52e-05	692.29	712.37	528	516.32	Promoter (<=1kb)	17	21383748	21399265	15518	1	210503	uc008aqs.1	0	ENSMUSG00000062743	Zfp677	zinc finger protein 677	uc008aqs.1;uc008aqt.1	210503;210503	0;0
chr2	118673223	118687820	14598	*	7.89	8.2	7.5	0.7	3.45e-06	4.59e-05	288.83	298.34	198	162.91	Promoter (<=1kb)	2	118677246	118698020	20775	1	214230	uc008lsg.2	0	ENSMUSG00000074923	Pak6	p21 (RAC1) activated kinase 6	uc008lsf.2;uc008lsg.2	214230;214230	0;0
chr1	17085085	17102021	16937	*	8.27	8.54	7.94	0.6	3.45e-06	4.59e-05	374.08	372.02	241	251.04	Promoter (<=1kb)	1	16994938	17097889	102952	2	57339	uc007aka.3	0	ENSMUSG00000042686	Jph1	junctophilin 1	uc007aka.3	57339	0
chr8	54623423	54842762	219340	*	12.13	12.04	12.22	-0.17	3.47e-06	4.62e-05	4267.11	4177.43	4853	4662.03	Promoter (<=1kb)	8	54779434	55060878	281445	1	234267	uc029wtb.1	0	ENSMUSG00000031517	Gpm6a	glycoprotein m6a	uc029wtb.1;uc009lsg.3;uc012gdy.2;uc009lsi.3;uc009lsj.1;uc009lsk.1	234267;244484;244484;244484;244484;244484	0;0;0;0;0;0
chr13	113836364	113849391	13028	*	7.76	8.07	7.36	0.71	3.5e-06	4.65e-05	270.21	266.68	170	158.46	Intron (uc007rxj.1/218639, intron 1 of 4)	13	113794508	114157461	362954	1	218639	uc007rxj.1	41856	ENSMUSG00000042348	Arl15	ADP-ribosylation factor-like 15	uc007rxj.1;uc007rxk.2;uc011zev.1	218639;218639;218639	0;0;0
chr2	26879109	26888756	9648	*	7.65	7.98	7.22	0.75	3.57e-06	4.74e-05	267.32	236.24	158	140.65	Downstream (2-3kb)	2	26890772	26902813	12042	2	20935	uc008iwc.1	14057	ENSMUSG00000036160	Surf6	surfeit gene 6	uc008iwc.1	20935	14057
chr8	102043169	102125012	81844	*	10.64	10.5	10.78	-0.28	3.58e-06	4.74e-05	1424.72	1466.76	1812	1694.07	Distal Intergenic	8	102632095	102785111	153017	2	12552	uc009mzu.2	660099	ENSMUSG00000031673	Cdh11	cadherin 11	NA	NA	NA
chr5	84111620	84192674	81055	*	10.13	9.96	10.28	-0.32	3.59e-06	4.75e-05	972.02	1016.2	1251	1227.6	3' UTR	5	84054761	84417382	362622	2	13839	uc008xwv.4	224708	ENSMUSG00000029245	Epha5	Eph receptor A5	uc008xwv.4;uc008xww.1;uc008xwx.1;uc008xwy.1;uc008xwz.1	13839;13839;13839;13839;13839	0;0;0;0;0
chr8	95348237	95409206	60970	*	10.03	10.19	9.86	0.33	3.59e-06	4.75e-05	1151.19	1182.42	906	946.29	Promoter (<=1kb)	8	95352296	95374293	21998	1	17388	uc009myh.2	0	ENSMUSG00000031790	Mmp15	matrix metallopeptidase 15	uc009myg.2;uc009myh.2	101985;17388	0;0
chr3	121255025	121282013	26989	*	8.85	9.08	8.59	0.49	3.62e-06	4.78e-05	549.11	529.71	390	379.23	Promoter (<=1kb)	3	121202008	121262889	60882	2	99887	uc008rdv.2	0	ENSMUSG00000028132	Tmem56	transmembrane protein 56	uc008rdt.1;uc008rdu.2;uc008rdv.2;uc008rdw.2	99887;99887;99887;99887	0;0;0;0
chr12	115586301	115665579	79279	*	12.03	11.94	12.11	-0.17	3.66e-06	4.82e-05	3962.14	3877.26	4354	4489.32	Exon (uc057kpk.1/uc057kpk.1, exon 41 of 1341)	12	115695720	115695794	75	2	102465205	uc033ggj.1	30215	ENSMUSG00000098336	Mir6388	microRNA 6388	NA	NA	NA
chr3	135822151	135835639	13489	*	7.9	8.2	7.53	0.68	3.69e-06	4.86e-05	303.32	285.56	187	181.6	Promoter (<=1kb)	3	135825279	135888572	63294	1	67547	uc008rlz.3	0	ENSMUSG00000053897	Slc39a8	solute carrier family 39 (metal ion transporter), member 8	uc008rlz.3;uc008rma.2;uc012cyh.1;uc012cyi.1;uc008rmb.2;uc029uou.1	67547;67547;67547;67547;67547;71038	0;0;0;0;0;0
chr14	77725218	77788159	62942	*	10.04	10.2	9.87	0.33	3.71e-06	4.89e-05	1196.3	1156.85	904	962.32	Distal Intergenic	14	77793945	77798968	5024	2	380920	uc007usb.1	10809	ENSMUSG00000075512	Gm1587	predicted gene 1587	uc007urw.2;uc007urx.2;uc007ury.2;uc007urz.2	239188;239188;239188;239188	0;0;0;0
chr8	39730408	39823977	93570	*	10.97	10.85	11.08	-0.24	3.72e-06	4.9e-05	1848.86	1830.25	2187	2156.98	Distal Intergenic	8	39603452	39642678	39227	2	20288	uc009lmk.1	-87730	ENSMUSG00000025044	Msr1	macrophage scavenger receptor 1	NA	NA	NA
chr7	81701075	81715683	14609	*	7.99	8.28	7.62	0.67	3.79e-06	4.98e-05	311.18	311.13	185	207.42	Promoter (<=1kb)	7	81600481	81706925	106445	2	26557	uc009ich.2	0	ENSMUSG00000025813	Homer2	homer scaffolding protein 2	uc009ich.2;uc009ici.2;uc009icj.2;uc009ick.2	26557;26557;26557;26557	0;0;0;0
chr18	58207345	58213623	6279	*	6.64	7.08	6.01	1.07	3.8e-06	4.99e-05	141.52	128.47	63	65.88	Promoter (<=1kb)	18	58008623	58209926	201304	2	14119	uc008ezn.1	0	ENSMUSG00000024598	Fbn2	fibrillin 2	uc008ezn.1	14119	0
chr6	127015597	127024989	9393	*	7.16	7.53	6.64	0.89	3.84e-06	5.04e-05	181.24	189.36	92	107.72	Promoter (<=1kb)	6	127015542	127024718	9177	1	14177	uc009dvo.1	55	ENSMUSG00000000183	Fgf6	fibroblast growth factor 6	uc009dvo.1	14177	0
chr7	25176138	25184144	8007	*	7.3	7.66	6.82	0.83	3.89e-06	5.1e-05	198.21	205.8	109	117.51	Distal Intergenic	7	25155069	25156630	1562	1	434147	uc029wdy.1	21069	ENSMUSG00000074274	D930028M14Rik	RIKEN cDNA D930028M14 gene	NA	NA	NA
chr14	52050050	52058366	8317	*	6.94	7.34	6.38	0.95	3.94e-06	5.16e-05	169.66	153.43	83	83.68	Distal Intergenic	14	52035174	52036109	936	2	258420	uc007toa.1	-13941	ENSMUSG00000044286	Olfr221	olfactory receptor 221	NA	NA	NA
chr8	105547955	105623001	75047	*	10.38	10.52	10.23	0.29	3.96e-06	5.18e-05	1451.61	1485.02	1183	1212.46	Promoter (<=1kb)	8	105615466	105615573	108	1	100316712	uc012gjm.1	0	ENSMUSG00000089432	Mir1966	microRNA 1966	uc012gjm.1;uc009ndh.2;uc033jhh.1;uc009ndi.2;uc009ndg.1;uc009ndk.1;uc009ndl.1;uc009ndj.2	100316712;11604;11604;11604;11972;546100;546100;75687	0;0;0;0;0;0;0;0
chr8	75852978	76097747	244770	*	12.28	12.19	12.36	-0.16	4.02e-06	5.26e-05	4667.67	4680.35	5365	5113.36	3' UTR	8	75448694	75984508	535815	1	71831	uc009mhi.3	404284	ENSMUSG00000031620	Iqcm	IQ motif containing M	uc009mhi.3;uc009mhj.3;uc012ggd.2	71831;71831;71831	0;0;0
chr8	102893647	103078420	184774	*	11.77	11.67	11.86	-0.19	4.04e-06	5.27e-05	3294.68	3244.04	3757	3677.45	Distal Intergenic	8	102661487	102785111	123625	2	12552	uc009mzv.1	-108536	ENSMUSG00000031673	Cdh11	cadherin 11	NA	NA	NA
chr19	44824214	44846776	22563	*	8.47	8.72	8.16	0.56	4.11e-06	5.35e-05	429.11	416.46	277	296.44	Promoter (<=1kb)	19	44828493	44835938	7446	2	73322	uc029tsl.1	0	ENSMUSG00000092369	1700039E22Rik	RIKEN cDNA 1700039E22 gene	uc008hqa.3;uc029tsl.1	18504;73322	0;0
chr15	96578337	96587739	9403	*	7.31	7.67	6.85	0.82	4.13e-06	5.39e-05	203.59	202.75	116	113.95	3' UTR	15	96571418	96641962	70545	2	105727	uc007xkh.2	54223	ENSMUSG00000023169	Slc38a1	solute carrier family 38, member 1	uc007xkh.2;uc007xki.2;uc007xkj.2;uc007xkk.2	105727;105727;105727;105727	0;0;0;0
chr8	118764806	118998591	233786	*	12.02	12.11	11.92	0.18	4.15e-06	5.39e-05	4402.01	4410.63	3771	4002.38	3' UTR	8	118283611	118852758	569148	1	12554	uc009npi.2	481195	ENSMUSG00000031841	Cdh13	cadherin 13	uc009npi.2;uc009npj.2;uc009npk.2;uc009npl.2;uc012glo.1	12554;12554;12554;12554;12554	0;0;0;0;0
chr4	134247937	134255087	7151	*	6.97	7.36	6.43	0.93	4.19e-06	5.44e-05	167.18	161.96	86	86.35	Promoter (<=1kb)	4	134251110	134254106	2997	2	72690	uc008veo.1	0	ENSMUSG00000050105	Grrp1	glycine/arginine rich protein 1	uc008vej.1;uc008vek.1;uc008veo.1;uc008vem.1;uc008ven.1;uc008vel.2;uc029uzv.1	68040;68040;72690;77490;77490;77490;77490	-2346;-2346;0;4174;4174;4174;4174
chr8	59867432	60056186	188755	*	11.9	11.81	11.99	-0.18	4.25e-06	5.51e-05	3591.38	3595.35	4165	3982.8	Distal Intergenic	8	59825649	59844721	19073	1	75017	uc057alo.1	41783	ENSMUSG00000110406	4930470O06Rik	RIKEN cDNA 4930470O06 gene	NA	NA	NA
chr2	99121269	99152971	31703	*	8.95	8.69	9.17	-0.48	4.25e-06	5.51e-05	427.46	397.59	605	548.37	Distal Intergenic	2	97467657	97631664	164008	1	241568	uc033hot.1	1653612	ENSMUSG00000050587	Lrrc4c	leucine rich repeat containing 4C	NA	NA	NA
chr8	99675384	99834720	159337	*	11.68	11.58	11.77	-0.19	4.25e-06	5.51e-05	3071.23	3042.5	3561	3428.2	Exon (uc009mzs.2/234624, exon 2 of 5)	8	99416674	99733438	316765	1	234624	uc009mzs.2	258710	ENSMUSG00000052479	A330008L17Rik	RIKEN cDNA A330008L17 gene	uc009mzs.2	234624	0
chr8	70434434	70459490	25057	*	8.77	9	8.5	0.5	4.25e-06	5.51e-05	510.63	512.06	355	368.55	Promoter (<=1kb)	8	70382358	70439573	57216	2	382056	uc009mae.1	0	ENSMUSG00000003575	Crtc1	CREB regulated transcription coactivator 1	uc029wts.1;uc009maf.1;uc009mah.2;uc012gfb.1;uc009mae.1	234378;234378;234378;234378;382056	0;0;0;0;0
chr3	51558580	51565662	7083	*	6.64	7.08	6.01	1.07	4.27e-06	5.52e-05	128.28	142.47	60	68.55	Promoter (<=1kb)	3	51559757	51567117	7361	1	100039684	uc012cpj.2	0	NA	5031434O11Rik	RIKEN cDNA 5031434O11 gene	uc012cpj.2;uc008peb.1	100039684;73251	0;0
chr8	56377959	56806062	428104	*	13.07	13.01	13.14	-0.13	4.3e-06	5.56e-05	8164.7	8279.36	9111	8926.13	Promoter (<=1kb)	8	56531522	56550566	19045	2	382010	uc009lsp.1	0	ENSMUSG00000038215	Cep44	centrosomal protein 44	uc009lsp.1;uc009lsq.1;uc009lsr.1;uc012gdz.1;uc057alj.1	382010;50753;50753;50753;75123	0;0;0;0;0
chr12	112672685	112681496	8812	*	7.06	7.45	6.53	0.92	4.31e-06	5.56e-05	165.11	183.88	98	86.35	Promoter (<=1kb)	12	112653821	112674276	20456	2	11651	uc007pex.2	0	ENSMUSG00000001729	Akt1	thymoma viral proto-oncogene 1	uc007pex.2;uc007pey.2;uc007pez.2;uc007pfa.2	11651;11651;382639;382639	0;0;0;0
chr14	110432997	110509914	76918	*	10.12	9.96	10.27	-0.31	4.34e-06	5.6e-05	980.71	1007.67	1239	1230.27	Distal Intergenic	14	110748578	110755149	6572	2	239250	uc007uyd.2	245235	ENSMUSG00000045871	Slitrk6	SLIT and NTRK-like family, member 6	NA	NA	NA
chr3	8660400	8671070	10671	*	7.64	7.97	7.23	0.74	4.4e-06	5.67e-05	259.45	240.5	143	156.68	Promoter (<=1kb)	3	8663359	8667038	3680	2	15213	uc008oop.1	0	ENSMUSG00000040289	Hey1	hairy/enhancer-of-split related with YRPW motif 1	uc008oop.1	15213	0
chr7	34024020	34039073	15054	*	7.83	8.13	7.44	0.68	4.5e-06	5.79e-05	283.87	275.82	174	174.48	Promoter (2-3kb)	7	34021567	34022881	1315	1	11354	uc009giq.1	2453	ENSMUSG00000066583	Scgb1b27	secretoglobin, family 1B, member 27	uc009giq.1	11354	2453
chr6	54936721	54959718	22998	*	8.42	8.67	8.11	0.56	4.59e-06	5.9e-05	406.77	408.55	277	275.07	5' UTR	6	54923942	54971661	47720	2	107607	uc009caf.2	11943	ENSMUSG00000038058	Nod1	nucleotide-binding oligomerization domain containing 1	uc009caf.2;uc009cag.2	107607;107607	0;0
chr3	94670920	94682122	11203	*	7.47	7.81	7.04	0.77	4.6e-06	5.9e-05	228	220.41	136	126.41	Distal Intergenic	3	94660589	94667152	6564	2	545551	uc008qgw.1	-3768	NA	BC021767	cingulin pseudogene	uc008qgw.1	545551	-3768
chr14	95388858	95457726	68869	*	10.12	9.95	10.28	-0.34	4.6e-06	5.9e-05	991.05	982.1	1313	1175.97	Distal Intergenic	14	95881266	95882775	1510	1	66732	uc007uup.1	-423540	ENSMUSG00000034689	4921530L21Rik	RIKEN cDNA 4921530L21 gene	NA	NA	NA
chr2	165230761	165242321	11561	*	7.48	7.81	7.04	0.77	4.75e-06	6.09e-05	225.52	224.06	134	129.97	Promoter (<=1kb)	2	165111507	165234737	123231	2	104010	uc008nxc.2	0	ENSMUSG00000053166	Cdh22	cadherin 22	uc008nxc.2	104010	0
chr16	44328297	44339978	11682	*	7.83	8.14	7.45	0.69	4.75e-06	6.09e-05	268.56	295.3	175	173.59	Promoter (<=1kb)	16	44240180	44332838	92659	2	320007	uc007zhd.1	0	ENSMUSG00000022696	Sidt1	SID1 transmembrane family, member 1	uc007zhd.1;uc033gzb.1	320007;320007	0;0
chr15	93589684	93608971	19288	*	8.2	8.47	7.86	0.6	4.79e-06	6.13e-05	354.63	353.14	233	232.34	Promoter (<=1kb)	15	93499114	93595891	96778	2	106042	uc007xjb.1	0	ENSMUSG00000036158	Prickle1	prickle planar cell polarity protein 1	uc007xjb.1	106042	0
chr11	101463970	101477716	13747	*	7.34	7.7	6.86	0.84	4.79e-06	6.13e-05	199.45	216.15	105	127.3	Promoter (<=1kb)	11	101465040	101471306	6267	1	11858	uc007lpa.1	0	ENSMUSG00000001313	Rnd2	Rho family GTPase 2	uc007lpa.1;uc007lpb.1;uc007loy.1;uc007loz.1	11858;11858;26949;26949	0;0;0;0
chr19	16845814	16895952	50139	*	9.7	9.87	9.49	0.38	4.87e-06	6.22e-05	933.95	943.74	766	676.56	Promoter (<=1kb)	19	16872316	16873830	1515	2	14240	uc008gxc.1	0	ENSMUSG00000056829	Foxb2	forkhead box B2	uc008gxc.1	14240	0
chr7	95974834	95998132	23299	*	8.38	8.64	8.07	0.58	4.87e-06	6.22e-05	394.35	404.9	281	255.49	Distal Intergenic	7	96171244	96911093	739850	1	23966	uc009iiq.3	-173112	ENSMUSG00000048078	Tenm4	teneurin transmembrane protein 4	NA	NA	NA
chr4	123228652	123244401	15750	*	8.01	8.29	7.64	0.65	4.98e-06	6.35e-05	310.76	317.22	212	187.83	Promoter (<=1kb)	4	123233556	123249870	16315	1	56198	uc008uoz.1	0	ENSMUSG00000032744	Heyl	hairy/enhancer-of-split related with YRPW motif-like	uc008uoz.1	56198	0
chr13	35951818	35974795	22978	*	8.5	8.75	8.2	0.55	5e-06	6.37e-05	418.35	442.65	296	291.99	Promoter (<=1kb)	13	35967906	35970388	2483	1	76487	uc007qci.2	0	ENSMUSG00000050423	Ppp1r3g	protein phosphatase 1, regulatory subunit 3G	uc007qcj.1;uc007qci.2	380840;76487	142562;0
chr8	97723006	97795405	72400	*	10.47	10.32	10.61	-0.29	5.06e-06	6.44e-05	1316.71	1243.3	1536	1590.8	Distal Intergenic	8	99007127	99032740	25614	1	100873092	uc057lxr.1	-1211722	ENSMUSG00000089819	Gm15679	predicted gene 15679	NA	NA	NA
chr2	124607365	124614292	6928	*	6.7	7.12	6.09	1.03	5.07e-06	6.45e-05	134.07	144.91	69	67.66	Promoter (<=1kb)	2	124610106	124662885	52780	1	214968	uc008mbm.1	0	ENSMUSG00000027200	Sema6d	sema domain, transmembrane domain (TM), and cytoplasmic domain, (semaphorin) 6D	uc008mbk.2;uc008mbm.1;uc008mbn.1;uc008mbo.2;uc008mbp.2;uc008mbq.2	214968;214968;214968;214968;214968;214968	0;0;0;0;0;0
chr9	14737975	14757246	19272	*	8.17	8.46	7.82	0.63	5.16e-06	6.56e-05	335.18	367.15	242	210.98	Promoter (<=1kb)	9	14748459	14752122	3664	2	14345	uc009oew.1	0	ENSMUSG00000049307	Fut4	fucosyltransferase 4	uc009oew.1;uc009oeu.1;uc009oev.1;uc009oex.1;uc009oey.3	14345;330890;330890;69325;69325	0;0;0;0;13784
chr8	117482214	117521137	38924	*	9.45	9.64	9.24	0.39	5.19e-06	6.58e-05	796.57	795.79	593	619.59	Promoter (<=1kb)	8	117498275	117635142	136868	1	234779	uc009npc.2	0	ENSMUSG00000034330	Plcg2	phospholipase C, gamma 2	uc009npc.2	234779	0
chr8	43978221	44233761	255541	*	12.39	12.31	12.46	-0.16	5.2e-06	6.59e-05	5152.23	4997.57	5693	5609.21	Distal Intergenic	8	43673658	43699491	25834	2	384814	uc009loj.2	-278730	ENSMUSG00000079058	Gm5347	predicted gene 5347	NA	NA	NA
chr12	33948359	33982253	33895	*	9.3	9.5	9.06	0.43	5.22e-06	6.61e-05	756.43	689.24	559	511.87	Promoter (<=1kb)	12	33957671	33959831	2161	1	22160	uc007niw.1	0	ENSMUSG00000035799	Twist1	twist basic helix-loop-helix transcription factor 1	uc007niw.1	22160	0
chr10	49082458	49113227	30770	*	8.82	8.53	9.06	-0.53	5.25e-06	6.64e-05	393.94	345.23	567	497.63	3' UTR	10	49099463	49788754	689292	2	14806	uc007fag.2	675527	ENSMUSG00000056073	Grik2	glutamate receptor, ionotropic, kainate 2 (beta 2)	uc007fag.2;uc007fah.2	14806;14806	0;0
chr1	132313654	132323818	10165	*	7.46	7.8	7.03	0.77	5.27e-06	6.66e-05	229.25	216.15	132	129.08	Promoter (<=1kb)	1	132316125	132333488	17364	1	74137	uc007coo.2	0	ENSMUSG00000009772	Nuak2	NUAK family, SNF1-like kinase, 2	uc007coo.2;uc007cop.2	74137;74137	0;0
chr9	34483824	34492323	8500	*	7.33	7.68	6.88	0.81	5.35e-06	6.75e-05	206.49	203.97	120	114.84	Promoter (<=1kb)	9	34486126	34510605	24480	1	67703	uc009osf.1	0	ENSMUSG00000032036	Kirrel3	kirre like nephrin family adhesion molecule 3	uc009osf.1;uc009osg.1;uc009osh.2;uc009osi.2;uc009osj.2;uc012gqb.1	67703;67703;67703;67703;67703;67703	0;0;0;0;0;0
chr8	47152101	47325855	173755	*	11.7	11.8	11.61	0.19	5.38e-06	6.79e-05	3563.24	3544.82	3067	3170.92	Promoter (<=1kb)	8	47180048	47289402	109355	2	71069	uc009lqw.2	0	ENSMUSG00000038143	Stox2	storkhead box 2	uc009lqw.2;uc009lqx.2;uc009lqv.2;uc009lqz.2;uc012gdm.1	71069;71069;71069;71069;71069	0;0;0;0;0
chr14	70205034	70218248	13215	*	7.69	8.01	7.28	0.73	5.43e-06	6.83e-05	248.28	266.68	145	165.58	Promoter (<=1kb)	14	70180468	70206022	25555	2	20410	uc007unk.1	0	ENSMUSG00000022091	Sorbs3	sorbin and SH3 domain containing 3	uc007unp.2;uc007unq.2;uc011znz.2;uc033grw.1;uc007unk.1;uc007unl.1;uc007unm.1;uc007unn.1	19057;19057;19057;20410;20410;20410;20410;20410	0;0;0;0;0;0;0;-2031
chr3	84250107	84262138	12032	*	7.58	7.91	7.16	0.75	5.43e-06	6.83e-05	248.69	231.37	153	132.64	Promoter (<=1kb)	3	84160439	84259779	99341	2	80890	uc008ppx.3	0	ENSMUSG00000027993	Trim2	tripartite motif-containing 2	uc008ppx.3;uc008ppy.3;uc008ppz.3	80890;80890;80890	0;0;0
chr3	154317635	154345961	28327	*	8.96	9.17	8.7	0.47	5.46e-06	6.87e-05	578.08	574.16	434	400.59	Promoter (<=1kb)	3	154306293	154330560	24268	2	16875	uc008rum.2	0	ENSMUSG00000096225	Lhx8	LIM homeobox protein 8	uc008rum.2;uc008run.1	16875;99686	0;0
chr8	101230252	101360606	130355	*	11.34	11.23	11.44	-0.21	5.48e-06	6.88e-05	2410.39	2408.07	2808	2759.65	Distal Intergenic	8	102632095	102785111	153017	2	12552	uc009mzu.2	1424505	ENSMUSG00000031673	Cdh11	cadherin 11	NA	NA	NA
chr6	126637174	126653036	15863	*	8.22	8.49	7.89	0.6	5.49e-06	6.89e-05	367.04	351.92	241	234.13	Promoter (<=1kb)	6	126636463	126645801	9339	2	16485	uc009dvb.1	0	ENSMUSG00000047976	Kcna1	potassium voltage-gated channel, shaker-related subfamily, member 1	uc009dvb.1	16485	0
chr3	44553864	44612531	58668	*	9.71	9.51	9.88	-0.37	5.5e-06	6.9e-05	737.39	719.68	987	897.33	Distal Intergenic	3	45280439	45378260	97822	2	72511	uc008pcx.2	765729	ENSMUSG00000097040	2610316D01Rik	RIKEN cDNA 2610316D01 gene	NA	NA	NA
chr4	155683850	155692332	8483	*	6.93	7.34	6.35	0.99	5.52e-06	6.91e-05	174.21	149.78	71	92.58	Promoter (2-3kb)	4	155694342	155696485	2144	1	230991	uc008wei.3	-2010	ENSMUSG00000074738	Fndc10	fibronectin type III domain containing 10	uc008wei.3	230991	-2010
chr10	43561044	43587255	26212	*	8.55	8.8	8.25	0.56	5.57e-06	6.97e-05	436.56	456.04	281	325.82	Promoter (<=1kb)	10	43579169	43584265	5097	1	12484	uc007ezl.1	0	ENSMUSG00000047139	Cd24a	CD24a antigen	uc007ezl.1	12484	0
chr1	39190128	39196562	6435	*	7.12	7.5	6.61	0.89	5.6e-06	7e-05	190.35	171.7	106	89.91	Promoter (<=1kb)	1	39194272	39363240	168969	1	18143	uc007atd.2	0	ENSMUSG00000026077	Npas2	neuronal PAS domain protein 2	uc033fiv.1;uc007atd.2	102466631;18143	-3136;0
chr8	58299032	58388276	89245	*	10.99	10.86	11.11	-0.25	5.61e-06	7.01e-05	1912.59	1808.94	2245	2171.22	Exon (uc057aln.1/uc057aln.1, exon 1 of 1)	8	57774052	58911627	1137576	2	270049	uc012gea.2	523351	ENSMUSG00000096914	Galntl6	UDP-N-acetyl-alpha-D-galactosamine:polypeptide N-acetylgalactosaminyltransferase-like 6	uc012gea.2	270049	0
chr14	46877017	46890745	13729	*	7.87	8.17	7.5	0.67	5.81e-06	7.25e-05	292.97	281.9	188	173.59	Promoter (<=1kb)	14	46882965	47105817	222853	1	74480	uc007thn.2	0	ENSMUSG00000021838	Samd4	sterile alpha motif domain containing 4	uc007thn.2;uc007tho.2;uc007thp.1	74480;74480;74480	0;0;0
chr7	27358234	27381792	23559	*	8.47	8.72	8.17	0.55	5.86e-06	7.3e-05	423.73	417.68	285	291.1	Exon (uc009fvz.1/80297, exon 3 of 18)	7	27356383	27394506	38124	2	80297	uc009fvz.1	12714	ENSMUSG00000011751	Sptbn4	spectrin beta, non-erythrocytic 4	uc009fvv.1;uc009fvw.1;uc009fvx.1;uc009fvy.1;uc009fvz.1;uc012fgh.1;uc009fwa.1;uc009fwb.1;uc009fwc.1	192192;192192;192192;192192;80297;80297;80297;80297;80297	-2524;-2226;-2226;-2226;0;0;0;0;0
chr18	11837312	11844301	6990	*	7.02	7.41	6.49	0.92	5.86e-06	7.3e-05	180.83	158.91	96	83.68	Promoter (<=1kb)	18	11840361	11840438	78	2	100316686	uc012azj.1	0	ENSMUSG00000084565	Mir1901	microRNA 1901	uc012azj.1;uc008ebq.1;uc008ebr.2;uc012azi.1	100316686;621998;63955;63955	0;0;0;0
chr4	134698447	134703500	5054	*	6.14	6.63	5.38	1.26	5.95e-06	7.41e-05	94.76	103.51	43	40.06	Promoter (<=1kb)	4	134561690	134704290	142601	2	230815	uc012dmw.1	790	ENSMUSG00000037306	Man1c1	mannosidase, alpha, class 1C, member 1	uc012dmw.1;uc008vfm.2	230815;230815	0;0
chr8	125636936	125715386	78451	*	10.54	10.68	10.39	0.29	5.96e-06	7.41e-05	1642.38	1631.15	1275	1403.86	Promoter (<=1kb)	8	125669818	125673365	3548	1	74393	uc009nyi.2	0	ENSMUSG00000050930	Map10	microtubule-associated protein 10	uc009nyi.2	74393	0
chr15	100265819	100285143	19325	*	8.36	8.63	8.04	0.59	6.03e-06	7.49e-05	391.04	400.03	285	242.14	Promoter (<=1kb)	15	100280837	100285667	4831	1	75002	uc007xqt.1	0	ENSMUSG00000045631	Tmprss12	transmembrane (C-terminal) protease, serine 12	uc007xqs.1;uc007xqt.1;uc007xqu.1	11908;75002;75002	37960;0;0
chr9	45429068	45431908	2841	*	5.88	6.42	5.03	1.39	6.06e-06	7.52e-05	79.04	91.94	35	30.27	Promoter (<=1kb)	9	45430293	45753713	323421	1	114873	uc009pfz.1	0	ENSMUSG00000032087	Dscaml1	DS cell adhesion molecule like 1	uc009pfx.1;uc009pfy.1;uc009pfz.1;uc009pfw.1	114873;114873;114873;74602	0;0;0;0
chr12	15262368	15291616	29249	*	8.7	8.43	8.93	-0.5	6.07e-06	7.53e-05	339.73	348.88	508	467.36	Distal Intergenic	12	14996389	15050389	54001	2	73972	uc007nbp.1	-211979	ENSMUSG00000113644	4930448C13Rik	RIKEN cDNA 4930448C13 gene	NA	NA	NA
chr11	77459951	77472162	12212	*	7.71	8.02	7.31	0.71	6.1e-06	7.56e-05	264	256.33	172	145.1	Promoter (<=1kb)	11	77462384	77468370	5987	1	216961	uc007kgq.1	0	ENSMUSG00000020836	Coro6	coronin 6	uc007kgq.1;uc011xzu.1;uc011xzv.1;uc007kgr.1;uc007kgs.1;uc007kgt.1;uc007kgl.3;uc007kgo.3;uc007kgu.1;uc007kgv.1;uc007kgw.1;uc007kgx.1;uc011xzw.1	216961;216961;216961;216961;216961;216961;237860;237860;268445;268445;268445;268445;268445	0;0;0;0;0;0;0;0;0;0;0;0;0
chr11	52163071	52172958	9888	*	7.31	7.66	6.85	0.81	6.14e-06	7.6e-05	204	200.32	110	120.18	Distal Intergenic	11	52154876	52157907	3032	2	257871	uc011xuo.1	-5164	NA	Olfr1372-ps1	olfactory receptor 1372, pseudogene 1	NA	NA	NA
chr19	56395012	56399855	4844	*	6.53	6.98	5.89	1.08	6.17e-06	7.63e-05	122.07	129.69	62	56.97	Promoter (<=1kb)	19	56397129	56442344	45216	1	12369	uc008hyw.2	0	ENSMUSG00000025076	Casp7	caspase 7	uc008hyw.2;uc008hyu.3;uc008hyv.3;uc012bnr.3;uc012bns.2	12369;18175;18175;18175;18175	0;0;0;0;-4974
chr2	30225835	30234690	8856	*	7.58	7.91	7.14	0.77	6.26e-06	7.72e-05	261.52	219.8	134	148.66	Promoter (2-3kb)	2	30237197	30237631	435	2	67350	uc008jbt.2	2941	NA	1700084E18Rik	RIKEN cDNA 1700084E18 gene	uc008jbu.2;uc008jbt.2	241296;67350	-3079;2941
chr11	118903693	118914052	10360	*	7.28	7.64	6.79	0.85	6.26e-06	7.72e-05	201.52	197.27	98	123.74	Promoter (<=1kb)	11	118489760	118909572	419813	2	52897	uc007mpl.1	0	ENSMUSG00000025576	Rbfox3	RNA binding protein, fox-1 homolog (C. elegans) 3	uc007mpl.1;uc007mpm.1;uc007mpn.1;uc007mpo.1;uc007mpp.1	52897;52897;52897;52897;52897	0;0;0;0;0
chr13	58798262	58819975	21714	*	8.4	8.67	8.08	0.59	6.3e-06	7.76e-05	398.49	414.64	248	293.77	Promoter (<=1kb)	13	58806569	58937031	130463	1	18212	uc007quh.2	0	ENSMUSG00000055254	Ntrk2	neurotrophic tyrosine kinase, receptor, type 2	uc007quh.2;uc007qui.2;uc007quj.2;uc007quk.1	18212;18212;18212;18212	0;0;0;0
chr7	35212868	35217045	4178	*	6.04	6.55	5.24	1.31	6.31e-06	7.77e-05	98.07	89.5	34	41.84	Promoter (<=1kb)	7	35200878	35215345	14468	2	435965	uc009gjp.2	0	ENSMUSG00000001802	Lrp3	low density lipoprotein receptor-related protein 3	uc009gjp.2	435965	0
chr15	100596797	100601909	5113	*	6.36	6.83	5.66	1.18	6.38e-06	7.85e-05	120.42	107.77	44	56.97	Promoter (<=1kb)	15	100575318	100599984	24667	2	19009	uc007xrr.1	0	ENSMUSG00000009739	Pou6f1	POU domain, class 6, transcription factor 1	uc007xrr.1	19009	0
chr11	83408501	83420360	11860	*	7.46	7.8	7.02	0.78	6.5e-06	7.99e-05	216	230.76	120	139.76	Promoter (<=1kb)	11	83409317	83421038	11722	1	276952	uc007kov.1	0	ENSMUSG00000020684	Rasl10b	RAS-like, family 10, member B	uc007koy.2;uc007kov.1;uc007kow.3;uc007kox.1;uc007kot.2;uc007kou.2	237891;276952;276952;276952;71770;71770	9161;0;0;0;105804;105804
chr7	24432317	24438707	6391	*	6.47	6.92	5.81	1.11	6.53e-06	8.02e-05	120.83	121.77	52	60.53	Promoter (<=1kb)	7	24431926	24435532	3607	2	210145	uc009fpo.1	0	ENSMUSG00000062028	Irgc1	immunity-related GTPase family, cinema 1	uc009fpo.1;uc009fpp.1	210145;210145	0;0
chr8	122653725	122686888	33164	*	9.2	9.4	8.96	0.43	6.53e-06	8.02e-05	662.91	685.58	476	521.66	Promoter (<=1kb)	8	122625136	122678175	53040	2	12398	uc009ntl.2	0	ENSMUSG00000006362	Cbfa2t3	CBFA2/RUNX1 translocation partner 3	uc009ntl.2;uc009ntm.2;uc009ntn.2	12398;12398;12398	0;0;0
chr17	59982600	60024805	42206	*	9.21	8.98	9.4	-0.42	6.55e-06	8.03e-05	494.49	513.27	704	648.96	Distal Intergenic	17	59006395	59013322	6928	2	67993	uc008dfd.1	-969278	ENSMUSG00000024228	Nudt12	nudix (nucleoside diphosphate linked moiety X)-type motif 12	NA	NA	NA
chr13	48619491	48628999	9509	*	7.62	7.94	7.21	0.73	6.58e-06	8.05e-05	235.45	256.94	151	145.99	Promoter (<=1kb)	13	48577869	48625672	47804	2	218232	uc007qii.2	0	ENSMUSG00000038042	Ptpdc1	protein tyrosine phosphatase domain containing 1	uc007qii.2;uc007qij.2;uc007qik.2	218232;218232;218232	0;0;0
chr12	61321967	61363067	41101	*	9.28	9.05	9.47	-0.42	6.71e-06	8.22e-05	533.8	528.5	742	676.56	Distal Intergenic	12	61499660	61521820	22161	2	100504101	uc007nql.1	158753	ENSMUSG00000113429	Gm20063	predicted gene, 20063	NA	NA	NA
chr12	38161817	38187149	25333	*	8.69	8.43	8.92	-0.49	6.77e-06	8.28e-05	350.49	337.31	485	484.27	3' UTR	12	37880174	38633410	753237	1	217480	uc007nkj.1	281643	ENSMUSG00000036095	Dgkb	diacylglycerol kinase, beta	uc007nkj.1;uc007nkk.1;uc007nkl.1;uc007nkm.1;uc007nkn.1	217480;217480;217480;217480;217480	0;0;0;0;0
chr12	114505787	114573131	67345	*	10.31	10.15	10.44	-0.29	6.8e-06	8.3e-05	1126.78	1149.54	1416	1368.25	Promoter (<=1kb)	12	114513635	114513694	60	2	102465664	uc033ggi.1	0	ENSMUSG00000098357	Mir7094-2	microRNA 7094-2	uc033ggi.1	102465664	0
chr5	76653047	76661856	8810	*	7.33	7.68	6.87	0.81	6.88e-06	8.4e-05	193.66	216.76	114	119.29	Distal Intergenic	5	76591715	76646466	54752	1	381644	uc008xvc.1	61332	ENSMUSG00000036403	Cep135	centrosomal protein 135	NA	NA	NA
chr11	6871022	6897453	26432	*	8.56	8.8	8.27	0.53	6.92e-06	8.43e-05	440.7	451.17	315	304.45	Distal Intergenic	11	6716001	6720037	4037	2	626419	uc007hze.1	-150985	ENSMUSG00000086808	Gm11981	predicted gene 11981	NA	NA	NA
chr5	84254754	84313865	59112	*	9.8	9.61	9.97	-0.36	6.96e-06	8.48e-05	746.5	814.05	1031	969.44	Intron (uc008xwv.4/13839, intron 3 of 15)	5	84054761	84417382	362622	2	13839	uc008xwv.4	103517	ENSMUSG00000029245	Epha5	Eph receptor A5	uc008xwv.4;uc008xww.1;uc008xwx.1;uc008xwy.1;uc008xwz.1;uc008xxa.1	13839;13839;13839;13839;13839;13839	0;0;0;0;0;0
chr14	116019060	116056974	37915	*	9.33	9.11	9.51	-0.4	7.01e-06	8.53e-05	547.46	559.55	706	756.68	Intron (uc007uyi.2/103978, intron 7 of 7)	14	115092215	116525192	1432978	1	103978	uc007uyi.2	926845	ENSMUSG00000022112	Gpc5	glypican 5	uc007uyi.2	103978	0
chr14	32592354	32601303	8950	*	7.56	7.88	7.14	0.74	7.04e-06	8.56e-05	246.21	225.28	146	136.2	Promoter (<=1kb)	14	32599408	32629000	29593	1	107751	uc011zin.2	0	ENSMUSG00000041730	Prrxl1	paired related homeobox protein-like 1	uc011zin.2;uc011zio.1;uc007szf.1;uc057kry.1;uc011zip.1	107751;107751;107751;107751;107751	0;0;0;0;0
chr16	63528025	63588293	60269	*	9.83	9.65	9.99	-0.34	7.12e-06	8.65e-05	798.64	808.57	1048	988.13	3' UTR	16	63545218	63864157	318940	2	13837	uc007zpy.1	275864	ENSMUSG00000052504	Epha3	Eph receptor A3	uc007zpy.1;uc012agz.1	13837;13837	0;0
chr2	110887700	110920946	33247	*	8.92	8.67	9.13	-0.47	7.18e-06	8.71e-05	410.49	401.85	586	535.91	Intron (uc012caw.2/228432, intron 1 of 26)	2	110655201	110950244	295044	2	228432	uc012caw.2	29298	ENSMUSG00000074968	Ano3	anoctamin 3	uc012caw.2;uc008lmy.1	228432;228432	0;0
chr14	90137371	90255130	117760	*	10.82	10.69	10.94	-0.25	7.18e-06	8.71e-05	1637.82	1667.68	2016	1914.84	Exon (uc029smh.1/74967, exon 3 of 9)	14	90126891	90269760	142870	1	74967	uc029smh.1	10480	ENSMUSG00000115001	4930474H20Rik	RIKEN cDNA 4930474H20 gene	uc029smh.1	74967	0
chr1	79855185	79868638	13454	*	7.57	7.89	7.15	0.73	7.25e-06	8.79e-05	234.63	239.28	137	147.77	Promoter (<=1kb)	1	79794321	79858665	64345	2	20720	uc007bqz.2	0	ENSMUSG00000026249	Serpine2	serine (or cysteine) peptidase inhibitor, clade E, member 2	uc007bqz.2;uc007bra.2	20720;20720	0;0
chr14	98063633	98136856	73224	*	10.36	10.2	10.51	-0.3	7.38e-06	8.93e-05	1150.37	1207.38	1524	1386.95	Intron (uc007uur.2/13134, intron 1 of 11)	14	97786846	98169765	382920	2	13134	uc007uur.2	32909	ENSMUSG00000055639	Dach1	dachshund family transcription factor 1	uc007uur.2;uc007uus.2;uc007uut.2	13134;13134;13134	0;0;0
chr8	35354411	35438425	84015	*	10.57	10.7	10.43	0.27	7.42e-06	8.97e-05	1663.48	1662.81	1344	1413.65	Promoter (<=1kb)	8	35375741	35388139	12399	1	244416	uc009lkw.2	0	ENSMUSG00000046794	Ppp1r3b	protein phosphatase 1, regulatory subunit 3B	uc009lkw.2;uc009lkx.2	244416;244416	0;0
chr11	3760434	3766226	5793	*	6.63	7.06	6.02	1.04	7.54e-06	9.1e-05	128.28	138.21	62	67.66	Intron (uc007htp.1/74309, intron 1 of 12)	11	3703731	3775126	71396	2	74309	uc007htp.1	8900	ENSMUSG00000020435	Osbp2	oxysterol binding protein 2	uc007htp.1;uc007htq.1;uc007htr.1	74309;74309;74309	0;0;0
chr12	107997868	108006065	8198	*	7.09	7.46	6.59	0.87	7.56e-06	9.12e-05	176.69	175.35	95	97.92	Promoter (<=1kb)	12	107910403	108003414	93012	2	58208	uc007ozh.1	0	ENSMUSG00000048251	Bcl11b	B cell leukemia/lymphoma 11B	uc007ozh.1;uc007ozi.1;uc011yrp.1	58208;58208;58208	0;0;0
chr19	19300930	19352400	51471	*	9.51	9.31	9.69	-0.38	7.6e-06	9.17e-05	623.18	649.66	803	849.26	Distal Intergenic	19	18930609	19111196	180588	2	225998	uc008gye.2	-189734	ENSMUSG00000036192	Rorb	RAR-related orphan receptor beta	NA	NA	NA
chr2	164165680	164177423	11744	*	7.82	8.12	7.45	0.67	7.69e-06	9.26e-05	272.28	283.73	172	177.15	Promoter (<=1kb)	2	164163619	164171113	7495	2	16538	uc008ntv.1	0	ENSMUSG00000040164	Kcns1	K+ voltage-gated channel, subfamily S, 1	uc008ntv.1;uc012ciy.1;uc008ntw.2	16538;209232;209232	0;0;0
chr6	63784649	63834872	50224	*	9.55	9.35	9.73	-0.38	7.79e-06	9.38e-05	672.84	631.39	870	827	Intron (uc009cdy.1/14804, intron 2 of 8)	6	63256857	64278792	1021936	1	14804	uc009cdy.1	527792	ENSMUSG00000071424	Grid2	glutamate receptor, ionotropic, delta 2	uc009cdy.1;uc009cdz.1	14804;14804	0;0
chr7	105781153	105793575	12423	*	7.73	8.03	7.34	0.69	7.82e-06	9.41e-05	264.42	259.99	172	152.23	Promoter (<=1kb)	7	105752989	105787550	34562	2	233651	uc009izh.2	0	ENSMUSG00000036862	Dchs1	dachsous cadherin related 1	uc009izh.2;uc009izk.2	233651;233651	0;0
chr14	107086361	107129412	43052	*	9.43	9.22	9.61	-0.39	7.85e-06	9.43e-05	604.15	591.82	810	756.68	Distal Intergenic	14	106417187	106486520	69334	2	73631	uc007uyb.3	-599841	ENSMUSG00000099794	1700128A07Rik	RIKEN cDNA 1700128A07 gene	NA	NA	NA
chr11	97137017	97153662	16646	*	7.85	8.15	7.47	0.68	7.87e-06	9.44e-05	297.52	269.12	168	186.05	Promoter (<=1kb)	11	97146364	97146419	56	2	102466822	uc033fzp.1	0	ENSMUSG00000099286	Mir7235	microRNA 7235	uc033fzp.1;uc011ydr.1	102466822;73174	0;0
chr9	2999865	3038547	38683	*	16.95	16.82	17.08	-0.26	8e-06	9.59e-05	119738	111151	140685	135820	Promoter (<=1kb)	9	3038669	3038743	75	2	100628572	uc029wxb.1	196	ENSMUSG00000106183	Mir101c	microRNA 101c	uc029wxb.1	100628572	196
chr18	80343823	80368908	25086	*	8.45	8.7	8.14	0.55	8.01e-06	9.59e-05	421.66	407.94	268	297.33	Promoter (<=1kb)	18	80294544	80364254	69711	2	240444	uc012bfj.1	0	ENSMUSG00000059852	Kcng2	potassium voltage-gated channel, subfamily G, member 2	uc012bfj.1	240444	0
chr4	148127721	148139410	11690	*	7.78	8.08	7.4	0.68	8.01e-06	9.59e-05	266.49	273.99	168	170.03	Promoter (<=1kb)	4	148098437	148130698	32262	2	70433	uc008vua.2	0	ENSMUSG00000029005	Draxin	dorsal inhibitory axon guidance protein	uc008vua.2;uc008vub.2;uc008vuc.2	70433;71890;71890	0;0;-1080
chr8	70813560	70850696	37137	*	9.36	9.54	9.15	0.4	8.06e-06	9.64e-05	747.74	745.86	585	548.37	Promoter (<=1kb)	8	70835138	70839518	4381	2	70807	uc009mbs.1	0	ENSMUSG00000002910	Arrdc2	arrestin domain containing 2	uc009mbr.3;uc009mbs.1;uc009mbt.1;uc012gfj.1;uc009mbv.2;uc009mbw.2;uc009mbx.2;uc012gfk.1	16161;70807;70807;84036;84036;84036;84036;84036	0;0;0;0;0;0;0;0
chr5	84831756	84861201	29446	*	8.71	8.45	8.94	-0.49	8.16e-06	9.75e-05	350.08	347.66	511	470.92	Distal Intergenic	5	84330775	84417382	86608	2	13839	uc008xxb.1	-414374	ENSMUSG00000029245	Epha5	Eph receptor A5	NA	NA	NA
chr14	93622076	93652190	30115	*	9.05	8.81	9.26	-0.45	8.17e-06	9.75e-05	437.39	461.52	640	583.98	Intron (uc007uum.2/211712, intron 1 of 3)	14	93013700	93888888	875189	2	211712	uc007uum.2	236698	ENSMUSG00000055421	Pcdh9	protocadherin 9	uc007uum.2;uc011zpc.2;uc057kth.1;uc007uun.2;uc007uuo.2	211712;211712;211712;211712;211712	0;0;0;0;0
chr8	65004630	65184561	179932	*	11.7	11.79	11.6	0.18	8.23e-06	9.81e-05	3536.75	3524.73	3129	3097.93	Promoter (<=1kb)	8	65028417	65037336	8920	2	100038489	uc009lvh.3	0	ENSMUSG00000079042	Apela	apelin receptor early endogenous ligand	uc009lvh.3;uc009lve.2;uc009lvf.2;uc009lvg.2;uc009lvi.4	100038489;234329;260296;260296;407795	0;0;0;0;0
chr12	112869889	112892378	22490	*	8.38	8.63	8.08	0.56	8.35e-06	9.96e-05	396.83	397.59	261	278.64	Distal Intergenic	12	112850876	112860916	10041	2	56696	uc007pfk.1	-8973	ENSMUSG00000021298	Gpr132	G protein-coupled receptor 132	NA	NA	NA
chr2	104407140	104418031	10892	*	7.47	7.8	7.05	0.75	8.37e-06	9.96e-05	220.56	224.67	132	132.64	Promoter (<=1kb)	2	104143073	104410334	267262	2	241589	uc008ljr.2	0	ENSMUSG00000068373	D430041D05Rik	RIKEN cDNA D430041D05 gene	uc008ljr.2	241589	0
chr1	186699481	186707655	8175	*	6.94	7.33	6.41	0.92	8.44e-06	0.0001	160.14	160.74	82	88.13	Promoter (<=1kb)	1	186623186	186705992	82807	2	21808	uc007dzo.2	0	ENSMUSG00000039239	Tgfb2	transforming growth factor, beta 2	uc007dzo.2;uc007dzp.2	21808;21808	0;0
chr8	90588842	90790558	201717	*	11.95	12.04	11.86	0.18	8.44e-06	0.0001	4270.84	4151.25	3638	3812.77	Distal Intergenic	8	90828835	90874794	45960	1	109151	uc009mse.2	-38277	ENSMUSG00000056608	Chd9	chromodomain helicase DNA binding protein 9	NA	NA	NA
chr14	96122431	96178918	56488	*	9.87	9.68	10.03	-0.35	8.47e-06	0.0001	823.88	821.36	1098	993.47	Exon (uc007uuq.1/93688, exon 8 of 11)	14	96105265	96519034	413770	2	93688	uc007uuq.1	340116	ENSMUSG00000022076	Klhl1	kelch-like 1	uc007uuq.1	93688	0
chr8	30204386	30289800	85415	*	10.67	10.53	10.79	-0.26	8.47e-06	0.0001	1489.68	1472.85	1731	1810.69	Distal Intergenic	8	30568395	30575573	7179	1	71314	uc029wsd.1	-278595	ENSMUSG00000097044	4933433F19Rik	RIKEN cDNA 4933433F19 gene	NA	NA	NA
chr19	23885724	23900797	15074	*	8	8.28	7.65	0.63	8.54e-06	0.000101	316.56	304.43	205	196.74	5' UTR	19	23758876	23949597	190722	1	319924	uc008hai.1	126848	ENSMUSG00000024897	Apba1	amyloid beta (A4) precursor protein binding, family A, member 1	uc008hai.1;uc012bjp.1	319924;319924	0;0
chr10	121343121	121358642	15522	*	8.22	8.48	7.89	0.6	8.64e-06	0.000102	343.04	372.63	241	232.34	Distal Intergenic	10	121365090	121372250	7161	1	75612	uc007hfn.1	-6448	ENSMUSG00000034707	Gns	glucosamine (N-acetyl)-6-sulfatase	NA	NA	NA
chr7	29212039	29235049	23011	*	8.29	8.55	7.98	0.57	8.65e-06	0.000102	372.01	376.28	250	253.71	Promoter (<=1kb)	7	29181532	29214033	32502	2	320225	uc012fhe.1	0	ENSMUSG00000049676	Catsperg1	cation channel sperm associated auxiliary subunit gamma 1	uc012fhd.1;uc012fhe.1;uc009gbe.1;uc009gbf.1;uc009gbg.2;uc009gbh.2;uc009gbi.2	320225;320225;320225;52150;52150;77254;77254	-1284;0;-544;0;0;-3274;-3274
chr14	69164015	69182968	18954	*	8.3	8.57	7.98	0.59	8.65e-06	0.000102	382.35	376.89	230	273.29	Promoter (<=1kb)	14	69171802	69175540	3739	1	18092	uc007umc.2	0	ENSMUSG00000044186	Nkx2-6	NK2 homeobox 6	uc007umc.2;uc007umb.2;uc007uma.1	18092;18092;73554	0;0;0
chr8	58408861	58465201	56341	*	10.2	10.04	10.34	-0.3	8.94e-06	0.000106	1077.95	1022.29	1311	1281.01	3' UTR	8	57774052	58911627	1137576	2	270049	uc012gea.2	446426	ENSMUSG00000096914	Galntl6	UDP-N-acetyl-alpha-D-galactosamine:polypeptide N-acetylgalactosaminyltransferase-like 6	uc012gea.2;uc009ltc.1	270049;270049	0;0
chr2	71116125	71124613	8489	*	7.21	7.57	6.73	0.84	8.95e-06	0.000106	187.04	191.79	98	113.95	Promoter (<=1kb)	2	71118054	71142926	24873	1	73649	uc008kaf.2	0	ENSMUSG00000027015	Cybrd1	cytochrome b reductase 1	uc008kaf.2	73649	0
chr17	8512296	8533617	21322	*	8.31	8.57	8	0.57	8.97e-06	0.000106	394.35	365.93	260	251.93	Promoter (<=1kb)	17	8526801	8986648	459848	1	23984	uc008ajr.1	0	ENSMUSG00000023868	Pde10a	phosphodiesterase 10A	uc008ajr.1	23984	0
chr14	93244331	93312575	68245	*	10.19	10.03	10.33	-0.3	9.08e-06	0.000107	1026.23	1066.73	1282	1289.02	Intron (uc007uum.2/211712, intron 3 of 3)	14	93013700	93888888	875189	2	211712	uc007uum.2	576313	ENSMUSG00000055421	Pcdh9	protocadherin 9	uc007uum.2;uc011zpc.2;uc057kth.1;uc007uun.2;uc007uuo.2	211712;211712;211712;211712;211712	0;0;0;0;0
chr15	103132812	103149077	16266	*	7.83	8.13	7.46	0.67	9.12e-06	0.000107	273.52	286.17	170	182.49	Promoter (<=1kb)	15	103123070	103146828	23759	2	432989	uc029svj.1	0	ENSMUSG00000097003	D930007P13Rik	Riken cDNA D930007P13 gene	uc029svj.1;uc007xxh.1;uc007xxi.1	432989;71726;71726	0;14360;0
chr6	129864039	129920786	56748	*	10.47	10.33	10.6	-0.27	9.13e-06	0.000107	1274.51	1293.84	1520	1580.12	Promoter (<=1kb)	6	129898988	129913213	14226	2	16636	uc029wbs.2	0	ENSMUSG00000030173	Klra5	killer cell lectin-like receptor, subfamily A, member 5	uc029wbs.2;uc029wbt.2;uc009egx.3;uc009egt.2;uc009egu.2;uc009egw.1;uc012ets.1	16636;16636;16636;170733;170733;170733;170733	0;0;0;0;0;0;0
chr8	97552194	97717749	165556	*	11.68	11.57	11.78	-0.2	9.13e-06	0.000107	3009.57	3090.6	3644	3372.11	Distal Intergenic	8	99007127	99032740	25614	1	100873092	uc057lxr.1	-1289378	ENSMUSG00000089819	Gm15679	predicted gene 15679	NA	NA	NA
chr18	64653171	64663478	10308	*	7.67	7.99	7.27	0.72	9.17e-06	0.000108	273.94	233.2	152	155.79	Promoter (<=1kb)	18	64528979	64661000	132022	2	54670	uc008fem.1	0	ENSMUSG00000039529	Atp8b1	ATPase, class I, type 8B, member 1	uc008fem.1	54670	0
chr3	67580977	67584514	3538	*	6.29	6.76	5.61	1.15	9.32e-06	0.000109	111.31	105.33	52	45.4	Promoter (<=1kb)	3	67582768	67604231	21464	1	66868	uc008plp.1	0	ENSMUSG00000027775	Mfsd1	major facilitator superfamily domain containing 1	uc008plp.1	66868	0
chr12	5367007	5378655	11649	*	7.71	8.01	7.32	0.69	9.4e-06	0.00011	267.32	249.03	159	161.13	Promoter (<=1kb)	12	5077465	5375682	298218	2	208439	uc007myw.4	0	ENSMUSG00000020627	Klhl29	kelch-like 29	uc007myw.4;uc011yka.2	208439;72669	0;0
chr1	141974602	142021338	46737	*	9.5	9.29	9.67	-0.38	9.54e-06	0.000112	612.43	642.96	841	790.51	Distal Intergenic	1	140570176	140656402	86227	2	75910	uc029qtp.1	-1318200	ENSMUSG00000102368	4930590L20Rik	RIKEN cDNA 4930590L20 gene	NA	NA	NA
chr18	67118783	67142556	23774	*	8.56	8.8	8.27	0.53	9.6e-06	0.000112	430.77	462.74	298	320.48	Promoter (<=1kb)	18	67133560	67226792	93233	1	14680	uc008flt.3	0	ENSMUSG00000024524	Gnal	guanine nucleotide binding protein, alpha stimulating, olfactory type	uc008flr.2;uc008fls.3;uc008flt.3	14680;14680;14680	0;0;0
chr14	104432201	104489430	57230	*	10.01	10.16	9.85	0.31	9.7e-06	0.000113	1148.71	1144.67	923	922.26	Promoter (<=1kb)	14	104462320	104467999	5680	2	18996	uc007uxb.3	0	ENSMUSG00000048349	Pou4f1	POU domain, class 4, transcription factor 1	uc007uxb.3;uc007uxc.1	18996;72486	0;0
chr17	6851161	6868041	16881	*	8.11	8.38	7.77	0.61	9.8e-06	0.000114	343.45	322.09	211	225.22	Distal Intergenic	17	6895229	6895337	109	2	751529	uc012ajl.1	27296	ENSMUSG00000076218	Mir692-1	microRNA 692-1	NA	NA	NA
chr5	57205072	57243795	38724	*	9.1	8.86	9.3	-0.44	9.81e-06	0.000114	474.22	457.87	662	600	Distal Intergenic	5	57570084	57717919	147836	2	319216	uc008xls.1	474124	ENSMUSG00000097216	4932441J04Rik	RIKEN cDNA 4932441J04 gene	NA	NA	NA
chr7	35108524	35124406	15883	*	7.97	8.25	7.62	0.63	9.91e-06	0.000115	307.04	302.61	196	198.52	Promoter (<=1kb)	7	35119293	35121928	2636	1	12606	uc009gjl.3	0	ENSMUSG00000034957	Cebpa	CCAAT/enhancer binding protein (C/EBP), alpha	uc009gjl.3	12606	0
chr7	127455639	127469721	14083	*	8.05	8.33	7.71	0.62	1.02e-05	0.000119	327.32	314.17	202	216.32	Exon (uc009jvm.1/uc009jvm.1, exon 2 of 2)	7	127233443	127508184	274742	1	233887	uc029wov.1	222196	ENSMUSG00000045598	Zfp553	zinc finger protein 553	uc029wov.1;uc009jvo.1;uc009jvp.1	233887;233895;233895	0;-1278;-1893
chr14	66623735	66654100	30366	*	9.05	9.25	8.82	0.44	1.03e-05	0.000119	604.98	613.74	443	458.46	Promoter (<=1kb)	14	66635251	66640333	5083	1	11549	uc007ukh.2	0	ENSMUSG00000045875	Adra1a	adrenergic receptor, alpha 1a	uc007ukh.2;uc007uki.2;uc007ukj.2;uc007ukk.2;uc007ukl.2;uc029sky.2	11549;11549;11549;11549;11549;11549	0;0;0;0;0;0
chr13	52528470	52537192	8723	*	7.09	7.46	6.59	0.87	1.03e-05	0.000119	166.35	185.1	99	93.47	Promoter (<=1kb)	13	52504375	52530836	26462	2	68203	uc007qmv.1	0	ENSMUSG00000047842	Diras2	DIRAS family, GTP-binding RAS-like 2	uc007qmv.1	68203	0
chr4	145403458	145500795	97338	*	12.16	12.24	12.08	0.16	1.03e-05	0.00012	4841.05	4828.31	4408	4261.43	Promoter (<=1kb)	4	145464210	145467961	3752	1	545700	uc008vrx.1	0	ENSMUSG00000052912	Smarca5-ps	SWI/SNF related, matrix associated, actin depenent ragulator of chromatin, subfamily a, member 5, pseudogene	uc008vrx.1	545700	0
chr2	38706655	38713872	7218	*	7.22	7.57	6.75	0.83	1.03e-05	0.00012	196.97	183.88	101	113.95	Promoter (<=1kb)	2	38692656	38712234	19579	2	26423	uc008jnr.2	0	ENSMUSG00000026751	Nr5a1	nuclear receptor subfamily 5, group A, member 1	uc008jnr.2;uc008jns.2;uc008jnt.1	26423;26423;26423	0;0;0
chr3	152665468	152670064	4597	*	6.61	7.03	6.01	1.02	1.04e-05	0.00012	128.69	132.73	68	60.53	Promoter (<=1kb)	3	152462815	152668140	205326	2	229949	uc008rtq.1	0	ENSMUSG00000039058	Ak5	adenylate kinase 5	uc008rtq.1;uc029upf.1	229949;99542	0;0
chr5	53206698	53220463	13766	*	7.88	8.17	7.53	0.64	1.04e-05	0.000121	292.14	283.73	186	182.49	Promoter (<=1kb)	5	53107083	53213452	106370	2	231238	uc008xlc.1	0	ENSMUSG00000029189	Sel1l3	sel-1 suppressor of lin-12-like 3 (C. elegans)	uc008xlc.1;uc008xld.1;uc008xle.1	231238;231238;231238	0;0;0
chr1	131955840	131971479	15640	*	8.05	8.35	7.67	0.69	1.05e-05	0.000122	361.66	292.26	184	222.55	Promoter (<=1kb)	1	131962915	131982972	20058	1	212980	uc007cnz.2	0	ENSMUSG00000026435	Slc45a3	solute carrier family 45, member 3	uc007cnz.2;uc007coa.2	212980;212980	0;0
chr2	158665502	158675145	9644	*	7.12	7.48	6.63	0.85	1.08e-05	0.000125	172.97	183.88	102	96.14	Promoter (<=1kb)	2	158666630	158766334	99705	1	228852	uc012cil.1	0	ENSMUSG00000037754	Ppp1r16b	protein phosphatase 1, regulatory subunit 16B	uc012cil.1;uc008nqo.2;uc008nqp.2	228852;228852;228852	0;0;0
chr2	163337870	163343828	5959	*	6.58	7.01	5.96	1.05	1.08e-05	0.000125	122.07	135.78	59	65.88	3' UTR	2	163336242	163397973	61732	2	59091	uc008nsp.2	54145	ENSMUSG00000017817	Jph2	junctophilin 2	uc008nsp.2;uc029uhy.1	59091;59091	0;0
chr19	56868519	56880128	11610	*	7.7	8	7.32	0.68	1.1e-05	0.000126	254.49	258.16	165	154.01	Promoter (<=1kb)	19	56874416	56912078	37663	1	240675	uc008hzl.1	0	ENSMUSG00000025082	Vwa2	von Willebrand factor A domain containing 2	uc008hzl.1;uc008hzi.1;uc008hzj.1;uc012bnt.1;uc008hzk.1	240675;83561;83561;83561;83561	0;0;0;0;0
chr12	48105415	48143408	37994	*	9.13	8.89	9.33	-0.43	1.1e-05	0.000126	494.08	457.26	661	622.26	Distal Intergenic	12	49382883	49386867	3985	1	15228	uc011ylr.1	-1239475	ENSMUSG00000020950	Foxg1	forkhead box G1	NA	NA	NA
chr12	35097996	35124798	26803	*	8.63	8.37	8.86	-0.49	1.11e-05	0.000127	326.9	333.66	467	461.13	Exon (uc011yli.1/217463, exon 8 of 18)	12	35047189	35123025	75837	1	217463	uc011yli.1	50807	ENSMUSG00000020590	Snx13	sorting nexin 13	uc011yli.1;uc007njg.2;uc011ylj.1;uc007njh.2	217463;217463;217463;217463	0;0;0;0
chr18	4917585	4921940	4356	*	6.22	6.69	5.52	1.17	1.13e-05	0.000131	103.04	104.12	50	41.84	Promoter (<=1kb)	18	4920540	5049494	128955	1	225115	uc008dyn.2	0	ENSMUSG00000024236	Svil	supervillin	uc008dyn.2;uc008dyo.2	225115;225115	0;0
chr2	76403086	76412806	9721	*	7.59	7.92	7.15	0.77	1.14e-05	0.000131	234.63	250.85	166	118.4	Promoter (<=1kb)	2	76406508	76600647	194140	1	99031	uc008kfa.2	0	ENSMUSG00000042359	Osbpl6	oxysterol binding protein-like 6	uc008kfa.2;uc008kfb.2;uc008kfc.2	99031;99031;99031	0;0;0
chr7	73723938	73743001	19064	*	8.47	8.71	8.18	0.53	1.16e-05	0.000133	417.11	422.55	279	300.89	Promoter (<=1kb)	7	73740307	73776919	36613	1	100038347	uc009hrf.2	0	ENSMUSG00000078670	Fam174b	family with sequence similarity 174, member B	uc009hrf.2	100038347	0
chr1	132870029	132895612	25584	*	8.63	8.86	8.35	0.52	1.17e-05	0.000135	466.35	464.56	304	347.18	Promoter (<=1kb)	1	132880355	132940005	59651	1	16980	uc007cpi.2	0	ENSMUSG00000026443	Lrrn2	leucine rich repeat protein 2, neuronal	uc007cpi.2	16980	0
chr19	5081254	5089740	8487	*	7.1	7.48	6.58	0.89	1.2e-05	0.000138	167.18	188.75	84	107.72	Promoter (<=1kb)	19	5079337	5085477	6141	2	381199	uc008gcc.1	0	ENSMUSG00000061451	Tmem151a	transmembrane protein 151A	uc008gce.2;uc012bgt.2;uc008gcc.1;uc008gcd.2	12794;12794;381199;68090	8781;8781;0;0
chr5	73000346	73018211	17866	*	8.2	8.46	7.88	0.58	1.21e-05	0.000139	346.35	358.01	244	226.11	Promoter (<=1kb)	5	73006904	73012955	6052	1	231290	uc008xsk.1	0	ENSMUSG00000029219	Slc10a4	solute carrier family 10 (sodium/bile acid cotransporter family), member 4	uc008xsk.1;uc008xsl.1;uc008xsm.1;uc008xsn.1	231290;72313;72313;72313	0;28790;53367;238407
chr10	49244728	49274038	29311	*	8.91	8.66	9.12	-0.45	1.21e-05	0.000139	389.39	421.34	570	540.36	Exon (uc007fag.2/14806, exon 12 of 18)	10	49099463	49788754	689292	2	14806	uc007fag.2	514716	ENSMUSG00000056073	Grik2	glutamate receptor, ionotropic, kainate 2 (beta 2)	uc007fag.2;uc007fah.2	14806;14806	0;0
chr15	72533822	72549338	15517	*	7.95	8.23	7.6	0.63	1.22e-05	0.00014	294.21	306.87	199	189.61	Promoter (<=1kb)	15	72512119	72546279	34161	2	223604	uc007wbk.1	0	ENSMUSG00000036760	Kcnk9	potassium channel, subfamily K, member 9	uc007wbk.1	223604	0
chr15	11894686	11918105	23420	*	8.58	8.81	8.3	0.51	1.23e-05	0.00014	442.77	456.04	316	316.02	Promoter (<=1kb)	15	11839896	11905674	65779	2	18162	uc007vhe.2	0	ENSMUSG00000022206	Npr3	natriuretic peptide receptor 3	uc007vhd.2;uc007vhe.2;uc007vhf.2;uc007vhg.2;uc007vhh.1	18162;18162;18162;18162;381002	0;0;0;0;0
chr12	72637108	72648497	11390	*	7.63	7.94	7.23	0.71	1.23e-05	0.000141	244.14	248.42	165	135.31	Downstream (1-2kb)	12	72650353	72664828	14476	2	66375	uc007nvs.2	16331	ENSMUSG00000021094	Dhrs7	dehydrogenase/reductase (SDR family) member 7	uc007nvs.2	66375	16331
chr7	82855625	82882137	26513	*	8.66	8.89	8.39	0.5	1.23e-05	0.000141	462.63	485.88	331	340.95	Promoter (<=1kb)	7	82867333	82871576	4244	1	108797	uc009idj.2	0	ENSMUSG00000057706	Mex3b	mex3 RNA binding family member B	uc009idj.2	108797	0
chr16	92690790	92703815	13026	*	7.87	8.16	7.51	0.65	1.24e-05	0.000141	297.94	275.21	191	174.48	Promoter (<=1kb)	16	92601466	92697329	95864	2	12394	uc007zzi.3	0	ENSMUSG00000022952	Runx1	runt related transcription factor 1	uc007zzi.3;uc012ain.2;uc007zzj.3;uc007zzk.3;uc007zzl.1	12394;12394;12394;12394;12394	0;0;0;0;0
chr5	147744718	147757743	13026	*	7.71	8.02	7.32	0.7	1.25e-05	0.000143	264.83	254.51	146	174.48	Distal Intergenic	5	147638067	147725988	87922	2	14254	uc009aoi.2	-18730	ENSMUSG00000029648	Flt1	FMS-like tyrosine kinase 1	NA	NA	NA
chr7	43472898	43479186	6289	*	6.44	6.88	5.79	1.09	1.27e-05	0.000144	112.55	122.99	60	50.74	3' UTR	7	43472907	43490023	17117	2	210094	uc009gmv.2	10837	ENSMUSG00000013367	Iglon5	IgLON family member 5	uc009gmv.2;uc009gmu.2	210094;75690	0;9665
chr13	3695853	3723783	27931	*	8.62	8.85	8.34	0.52	1.27e-05	0.000145	473.39	451.17	347	299.11	Distal Intergenic	13	3634032	3651779	17748	1	142688	uc033ggn.1	61821	ENSMUSG00000033781	Asb13	ankyrin repeat and SOCS box-containing 13	NA	NA	NA
chr8	95298207	95341149	42943	*	9.74	9.91	9.55	0.36	1.28e-05	0.000146	1014.64	913.3	743	759.35	Promoter (<=1kb)	8	95332284	95347513	15230	1	101985	uc009myg.2	0	ENSMUSG00000031792	Usb1	U6 snRNA biogenesis 1	uc009myg.2;uc009myb.2;uc009aje.2;uc009myd.2;uc009mye.2;uc009myf.1	101985;333329;333329;73407;73407;79233	0;0;0;0;0;0
chr2	118780154	118799117	18964	*	8.07	8.35	7.74	0.61	1.34e-05	0.000152	313.66	337.31	221	205.64	Promoter (<=1kb)	2	118779719	118795175	15457	1	214240	uc008lsr.2	435	ENSMUSG00000040035	Disp2	dispatched RND tramsporter family member 2	uc008lsr.2;uc008lss.2;uc008lsp.1;uc008lsq.1;uc033hpm.2	214240;214240;214240;214240;53906	0;0;0;0;7385
chr1	38620576	38639279	18704	*	8.2	8.46	7.88	0.58	1.35e-05	0.000153	349.25	353.14	239	232.34	Promoter (<=1kb)	1	38175991	38627244	451254	2	16764	uc007ast.2	0	ENSMUSG00000037138	Aff3	AF4/FMR2 family, member 3	uc007ast.2;uc007asu.1;uc056ycp.1	16764;16764;16764	0;0;0
chr12	106441790	106473566	31777	*	8.78	8.99	8.52	0.47	1.35e-05	0.000153	510.22	507.79	366	369.44	Promoter (<=1kb)	12	106442652	106447666	5015	2	76639	uc011yrn.1	0	ENSMUSG00000092066	1700121N20Rik	RIKEN cDNA 1700121N20 gene	uc011yrn.1	76639	0
chr17	45529920	45548394	18475	*	8.17	8.45	7.83	0.62	1.37e-05	0.000155	353.8	344.01	201	252.82	Promoter (1-2kb)	17	45541940	45549677	7738	2	210573	uc008cqu.2	1283	ENSMUSG00000096847	Tmem151b	transmembrane protein 151B	uc008cqu.2;uc008cqt.2	210573;21645	0;0
chr8	43157358	43306473	149116	*	11.44	11.53	11.34	0.2	1.44e-05	0.000163	2936.33	2993.79	2635	2534.43	Promoter (<=1kb)	8	43180541	43193884	13344	1	622117	uc012gcu.1	0	ENSMUSG00000091490	Triml2	tripartite motif family-like 2	uc009lob.2;uc009loc.2;uc009lod.2;uc012gcu.1;uc012gcv.1;uc012gcw.1;uc012gcx.1	22702;22702;22702;622117;622117;622117;622117	0;0;0;0;0;0;0
chr3	138641789	138659062	17274	*	8.07	8.34	7.74	0.6	1.45e-05	0.000164	339.73	309.91	218	209.2	Distal Intergenic	3	138711535	138726984	15450	2	74635	uc008rno.1	67922	ENSMUSG00000105838	4930425O10Rik	RIKEN cDNA 4930425O10 gene	NA	NA	NA
chr7	84405917	84422378	16462	*	7.94	8.23	7.59	0.64	1.45e-05	0.000164	313.25	285.56	183	202.08	Promoter (<=1kb)	7	84246275	84410038	163764	2	11864	uc009ieh.2	0	ENSMUSG00000015709	Arnt2	aryl hydrocarbon receptor nuclear translocator 2	uc009ieh.2	11864	0
chr9	21026137	21044439	18303	*	8.04	8.31	7.7	0.61	1.46e-05	0.000164	311.59	323.92	201	215.43	Promoter (<=1kb)	9	21032251	21032328	78	2	100316681	uc012gpa.1	0	ENSMUSG00000084663	Mir1900	microRNA 1900	uc012gpa.1;uc009ojx.2;uc009oka.2;uc009ojy.1;uc009ojz.1	100316681;15894;15898;78369;78369	0;0;0;0;0
chr5	52100620	52120463	19844	*	8.35	8.59	8.05	0.55	1.47e-05	0.000166	384.01	388.46	259	269.73	Exon (uc008xke.1/uc008xke.1, exon 1 of 2)	5	52135902	52136017	116	2	102466648	uc033ijs.1	15554	ENSMUSG00000098726	Mir6417	microRNA 6417	NA	NA	NA
chr17	50407909	50431545	23637	*	8.57	8.81	8.29	0.53	1.49e-05	0.000168	479.6	418.9	308	316.02	Distal Intergenic	17	50509547	50688494	178948	1	224860	uc012avf.1	-78002	ENSMUSG00000038910	Plcl2	phospholipase C-like 2	NA	NA	NA
chr19	4678179	4720457	42279	*	9.54	9.71	9.35	0.36	1.52e-05	0.000171	842.91	827.45	657	644.51	Promoter (<=1kb)	19	4711223	4752352	41130	1	20743	uc008gan.1	0	ENSMUSG00000067889	Sptbn2	spectrin beta, non-erythrocytic 2	uc008gan.1;uc008gao.1;uc033hik.1;uc008gam.2	20743;20743;381196;381196	0;0;0;0
chr4	147227636	147314760	87125	*	11.11	11.21	10.99	0.22	1.53e-05	0.000172	2408.73	2342.92	1994	2082.2	Promoter (<=1kb)	4	147253295	147513420	260126	1	195531	uc029vau.1	0	ENSMUSG00000078496	Zfp982	zinc finger protein 982	uc008vsu.3;uc029vau.1	195531;195531	0;0
chr15	99054636	99065033	10398	*	7.5	7.82	7.09	0.73	1.54e-05	0.000173	214.76	238.07	139	133.53	Promoter (<=1kb)	15	99055174	99058978	3805	1	19132	uc007xon.2	0	ENSMUSG00000023484	Prph	peripherin	uc007xon.2;uc007xoo.2;uc007xop.2	19132;19132;19132	0;0;0
chr12	109450360	109454930	4571	*	6.34	6.79	5.67	1.12	1.54e-05	0.000173	112.97	108.99	45	56.97	Promoter (<=1kb)	12	109452823	109463336	10514	1	13386	uc007pam.2	0	ENSMUSG00000040856	Dlk1	delta like non-canonical Notch ligand 1	uc007pam.2;uc007pan.2;uc007pao.2;uc011yry.1;uc011yrz.1	13386;13386;13386;13386;13386	0;0;0;0;0
chr6	37824225	37854883	30659	*	8.95	9.15	8.71	0.45	1.57e-05	0.000176	586.77	552.24	403	431.75	Distal Intergenic	6	37870811	37946799	75989	1	21848	uc009bji.1	-15928	ENSMUSG00000029833	Trim24	tripartite motif-containing 24	NA	NA	NA
chr1	84933886	84936423	2538	*	5.74	6.27	4.89	1.38	1.58e-05	0.000177	72.83	81.59	29	30.27	Promoter (<=1kb)	1	84906705	84935083	28379	2	71781	uc007btd.1	0	ENSMUSG00000026220	Slc16a14	solute carrier family 16 (monocarboxylic acid transporters), member 14	uc007btd.1	71781	0
chr8	110709673	110765935	56263	*	9.84	10	9.65	0.35	1.58e-05	0.000177	994.78	1056.38	755	849.26	Promoter (<=1kb)	8	110713157	110720398	7242	1	234729	uc009nkw.2	0	ENSMUSG00000010936	Vac14	Vac14 homolog (S. cerevisiae)	uc009nku.1;uc009nkv.2;uc012gkn.2;uc009nkw.2;uc009nkx.2;uc009nky.2;uc012gko.1;uc009nkz.3;uc009nla.3	234729;234729;234729;234729;244654;244654;76527;76527;76527	0;0;0;0;0;0;0;0;0
chr6	46483110	46515929	32820	*	8.89	8.65	9.1	-0.45	1.59e-05	0.000177	403.04	400.63	568	527.89	Exon (uc009bst.3/66797, exon 13 of 24)	6	45060061	47301388	2241328	1	66797	uc009bst.3	1423049	ENSMUSG00000039419	Cntnap2	contactin associated protein-like 2	uc009bst.3	66797	0
chr11	120528470	120533411	4942	*	6.74	7.14	6.18	0.96	1.59e-05	0.000178	134.07	148.56	74	71.22	Promoter (<=1kb)	11	120530727	120538983	8257	1	14527	uc011yjd.1	0	ENSMUSG00000025127	Gcgr	glucagon receptor	uc011yjd.1;uc007mtc.2	14527;14527	0;0
chr15	81971342	81983074	11733	*	7.69	7.99	7.31	0.68	1.6e-05	0.000178	266.9	240.5	158	158.46	Promoter (<=1kb)	15	81980540	81981563	1024	1	66346	uc007wxv.3	0	ENSMUSG00000061633	1700029P11Rik	RIKEN cDNA 1700029P11 gene	uc007wxv.3	66346	0
chr1	178390270	178410081	19812	*	8.1	8.37	7.78	0.59	1.62e-05	0.000181	336.42	325.13	212	227	Promoter (<=1kb)	1	178405881	178483250	77370	1	68226	uc007dve.2	0	ENSMUSG00000026495	Efcab2	EF-hand calcium binding domain 2	uc007dve.2	68226	0
chr12	110180684	110195695	15012	*	7.97	8.25	7.61	0.65	1.62e-05	0.000181	303.32	306.87	218	171.81	Distal Intergenic	12	110151654	110158073	6420	2	67280	uc007pbg.2	-22611	ENSMUSG00000113331	3110009F21Rik	RIKEN cDNA 3110009F21 gene	NA	NA	NA
chr5	103404988	103427222	22235	*	8.28	8.54	7.97	0.57	1.63e-05	0.000182	392.7	350.1	249	251.93	Promoter (<=1kb)	5	103425192	103503854	78663	1	19249	uc008yjj.1	0	ENSMUSG00000034573	Ptpn13	protein tyrosine phosphatase, non-receptor type 13	uc008yjj.1;uc029vjz.1;uc012dzu.1;uc008yjk.1;uc012dzw.1;uc008yjl.1	19249;19249;19249;19249;19249;19249	0;0;0;0;0;0
chr9	107705926	107719280	13355	*	7.58	7.89	7.18	0.71	1.63e-05	0.000182	244.97	228.32	155	134.42	Promoter (<=1kb)	9	107681502	107710019	28518	2	20350	uc009rmt.1	0	ENSMUSG00000034684	Sema3f	sema domain, immunoglobulin domain (Ig), short basic domain, secreted, (semaphorin) 3F	uc009rms.1;uc009rmt.1;uc009rmu.1	20350;20350;20350	-335;0;0
chr12	75731296	75743748	12453	*	7.8	8.09	7.43	0.67	1.63e-05	0.000182	257.38	288.6	176	168.25	Promoter (<=1kb)	12	75714248	75735729	21482	2	81535	uc007nxk.2	0	ENSMUSG00000021054	Sgpp1	sphingosine-1-phosphate phosphatase 1	uc007nxk.2;uc007nxl.2	81535;81535	0;0
chr17	38777356	38837105	59750	*	10.01	9.84	10.16	-0.32	1.64e-05	0.000182	902.91	935.83	1188	1100.3	Distal Intergenic	17	38639447	38645653	6207	1	100126768	uc012ate.1	137909	ENSMUSG00000092342	Esp31	exocrine gland secreted peptide 31	NA	NA	NA
chr2	130351387	130367108	15722	*	7.81	8.1	7.45	0.65	1.65e-05	0.000183	276.42	272.77	169	181.6	Exon (uc008mio.2/228598, exon 7 of 17)	2	130295939	130370481	74543	1	228598	uc008mio.2	55448	ENSMUSG00000053552	Ebf4	early B cell factor 4	uc008mio.2;uc008mip.2;uc008miq.2;uc012cec.1;uc012ced.1	228598;228598;228598;228598;228598	0;0;0;0;0
chr8	17530476	17537378	6903	*	6.96	7.33	6.45	0.89	1.67e-05	0.000185	167.18	155.26	82	92.58	Promoter (<=1kb)	8	15892545	17535385	1642841	2	94109	uc009kzp.1	0	ENSMUSG00000060924	Csmd1	CUB and Sushi multiple domains 1	uc009kzp.1;uc009kzq.1;uc009kzr.1	94109;94109;94109	0;0;0
chr11	104216504	104235411	18908	*	8.15	8.41	7.82	0.59	1.68e-05	0.000186	326.07	354.97	218	233.23	Promoter (<=1kb)	11	104231436	104295317	63882	1	17762	uc007lwe.1	0	ENSMUSG00000018411	Mapt	microtubule-associated protein tau	uc007lwe.1;uc007lwf.3;uc007lwg.3;uc007lwh.3;uc007lwi.3;uc011yga.3	17762;17762;17762;17762;17762;17762	0;0;0;0;0;0
chr8	68971755	69170259	198505	*	11.87	11.96	11.79	0.17	1.69e-05	0.000187	3923.24	4019.13	3562	3503.86	Promoter (<=1kb)	8	69037708	69089222	51515	2	110877	uc009lwt.1	0	ENSMUSG00000036330	Slc18a1	solute carrier family 18 (vesicular monoamine), member 1	uc009lwt.1;uc009lwu.1;uc009lwv.1;uc009lww.2;uc009lwx.3;uc009lwy.1;uc009lxa.1	110877;110877;110877;11966;11966;11966;211134	0;0;0;0;0;0;0
chr13	24629396	24647117	17722	*	8.17	8.44	7.85	0.59	1.7e-05	0.000188	330.21	362.88	231	230.56	Promoter (<=1kb)	13	24638648	24695725	57078	1	193385	uc007pwc.1	0	ENSMUSG00000036006	Ripor2	RHO family interacting cell polarization regulator 2	uc033glb.1;uc007pwa.2;uc007pwb.2;uc011yxo.2;uc007pwc.1;uc007pwd.1;uc007pwe.1	193385;193385;193385;193385;193385;193385;193385	0;0;0;0;0;0;0
chr6	29162215	29190255	28041	*	8.79	9.01	8.53	0.48	1.7e-05	0.000188	492.01	537.02	360	378.34	Promoter (<=1kb)	6	29169230	29179584	10355	2	101359	uc009bcz.2	0	ENSMUSG00000079654	Prrt4	proline-rich transmembrane protein 4	uc009bcz.2;uc009bcy.2	101359;68272	0;0
chr6	147251801	147270858	19058	*	8.26	8.51	7.95	0.56	1.72e-05	0.000189	358.35	370.19	244	250.15	Promoter (<=1kb)	6	147252109	147264013	11905	2	19227	uc009esx.3	0	ENSMUSG00000048776	Pthlh	parathyroid hormone-like peptide	uc009esx.3	19227	0
chr18	38207143	38223197	16055	*	7.86	8.15	7.48	0.67	1.72e-05	0.00019	272.28	296.52	162	195.85	Promoter (<=1kb)	18	38196694	38209762	13069	2	75599	uc008eru.1	0	ENSMUSG00000051375	Pcdh1	protocadherin 1	uc008eru.1	75599	0
chr4	55197475	55213323	15849	*	7.74	8.03	7.38	0.66	1.73e-05	0.000191	262.35	261.81	163	169.14	Distal Intergenic	4	55350042	55392237	42196	1	19359	uc012dej.1	-136719	ENSMUSG00000028426	Rad23b	RAD23 homolog B, nucleotide excision repair protein	NA	NA	NA
chr9	56792823	56801048	8226	*	7.19	7.56	6.7	0.87	1.75e-05	0.000192	175.87	202.14	88	119.29	Distal Intergenic	9	56848659	56851963	3305	2	382075	uc009ptj.1	50915	ENSMUSG00000045620	Odf3l1	outer dense fiber of sperm tails 3-like 1	NA	NA	NA
chr2	11549890	11560247	10358	*	7.44	7.77	7.02	0.75	1.77e-05	0.000194	220.56	216.15	117	142.43	Promoter (<=1kb)	2	11471430	11553929	82500	2	170768	uc008iih.3	0	ENSMUSG00000026773	Pfkfb3	6-phosphofructo-2-kinase/fructose-2,6-biphosphatase 3	uc008iih.3	170768	0
chr6	38631916	38648921	17006	*	8.13	8.39	7.8	0.6	1.78e-05	0.000196	318.21	354.36	220	224.33	Promoter (<=1kb)	6	38626660	38637239	10580	2	74253	uc009bkv.1	0	ENSMUSG00000071537	Klrg2	killer cell lectin-like receptor subfamily G, member 2	uc009bkv.1;uc012eke.1	74253;74253	0;0
chr12	4131406	4138596	7191	*	6.99	7.36	6.49	0.87	1.8e-05	0.000198	158.49	169.26	94	85.46	Promoter (<=1kb)	12	4133397	4213524	80128	1	104111	uc007mxk.2	0	ENSMUSG00000020654	Adcy3	adenylate cyclase 3	uc007mxk.2;uc007mxl.2;uc007mxm.2	104111;104111;104111	0;0;0
chr14	109240163	109299936	59774	*	9.9	9.74	10.05	-0.32	1.81e-05	0.000199	833.39	871.9	1066	1055.79	Distal Intergenic	14	108909988	108914239	4252	2	76965	uc007uyc.2	-325924	ENSMUSG00000075478	Slitrk1	SLIT and NTRK-like family, member 1	NA	NA	NA
chr3	107510184	107521654	11471	*	7.66	7.96	7.28	0.68	1.82e-05	0.0002	254.07	242.33	152	158.46	Promoter (<=1kb)	3	107467548	107518018	50471	2	229706	uc008qxb.1	0	ENSMUSG00000027894	Slc6a17	solute carrier family 6 (neurotransmitter transporter), member 17	uc008qxb.1;uc008qxc.1;uc008qxd.1	229706;229706;229706	0;0;0
chr6	92942164	92948407	6244	*	6.59	7.01	5.99	1.02	1.82e-05	0.0002	129.52	127.86	57	70.33	Promoter (1-2kb)	6	92940582	93111749	171168	1	330385	uc012epf.1	1582	ENSMUSG00000097462	9530026P05Rik	RIKEN cDNA 9530026P05 gene	uc012epf.1;uc012epg.1;uc009czg.2;uc009czh.2;uc012eph.1	330385;330385;330385;330385;330385	0;0;0;0;0
chr10	16505883	16527769	21887	*	8.28	7.98	8.53	-0.54	1.85e-05	0.000203	243.73	262.42	371	366.77	Distal Intergenic	10	16951094	17095782	144689	2	100504235	uc007els.2	568013	ENSMUSG00000101969	Gm20125	predicted gene, 20125	NA	NA	NA
chr16	17557729	17577347	19619	*	7.91	8.19	7.57	0.62	1.85e-05	0.000203	297.11	287.38	190	190.5	Promoter (<=1kb)	16	17561885	17572012	10128	1	18440	uc007yli.2	0	ENSMUSG00000022758	P2rx6	purinergic receptor P2X, ligand-gated ion channel, 6	uc007yli.2;uc012abt.1;uc012abu.1;uc007ylj.1;uc007ylk.1;uc007yle.2;uc007ylf.2	18440;18440;18440;224022;224022;74685;74685	0;0;0;0;0;0;0
chr16	69222314	69254875	32562	*	8.93	8.69	9.13	-0.44	1.86e-05	0.000203	396.01	431.08	571	551.04	Distal Intergenic	16	69796141	69800381	4241	2	78110	uc056zcq.1	545506	ENSMUSG00000107073	4930428D20Rik	RIKEN cDNA 4930428D20 gene	NA	NA	NA
chr7	10150060	10186771	36712	*	9.17	8.94	9.38	-0.44	1.87e-05	0.000204	487.87	494.4	720	608.01	Promoter (<=1kb)	7	10158652	10176286	17635	2	384534	uc012eyq.1	0	ENSMUSG00000091930	Vmn2r52	vomeronasal 2, receptor 52	uc012eyq.1	384534	0
chr8	87898348	87973437	75090	*	10.21	10.35	10.06	0.3	1.87e-05	0.000204	1288.16	1329.76	1029	1102.97	Promoter (<=1kb)	8	87661810	87959595	297786	2	94187	uc009mqv.1	0	ENSMUSG00000045333	Zfp423	zinc finger protein 423	uc009mqv.1	94187	0
chr5	150587530	150598090	10561	*	7.47	7.79	7.07	0.72	1.87e-05	0.000204	228.83	213.71	131	137.09	Promoter (<=1kb)	5	150571643	150594525	22883	2	100637	uc009auc.2	0	ENSMUSG00000041132	N4bp2l1	NEDD4 binding protein 2-like 1	uc009auc.2;uc009aud.2;uc009aue.2	100637;100637;100637	0;0;0
chr2	91454673	91464750	10078	*	7.26	7.6	6.82	0.78	1.87e-05	0.000204	194.9	193.01	117	109.5	Promoter (<=1kb)	2	91457531	91480869	23339	1	228357	uc008kvw.2	0	ENSMUSG00000027253	Lrp4	low density lipoprotein receptor-related protein 4	uc008kvw.2;uc008kvx.2	228357;228357	0;0
chr8	76104971	76198431	93461	*	10.91	10.8	11.02	-0.22	1.9e-05	0.000207	1777.69	1776.06	2083	2069.74	Distal Intergenic	8	75448694	75984508	535815	1	71831	uc012ggd.2	656277	ENSMUSG00000031620	Iqcm	IQ motif containing M	NA	NA	NA
chr1	142434911	142469299	34389	*	9.04	8.81	9.25	-0.44	1.91e-05	0.000207	448.15	448.13	648	566.17	Distal Intergenic	1	143640697	143649937	9241	1	26878	uc007cwy.2	-1171398	ENSMUSG00000033849	B3galt2	UDP-Gal:betaGlcNAc beta 1,3-galactosyltransferase, polypeptide 2	NA	NA	NA
chr14	93381651	93467922	86272	*	10.47	10.33	10.61	-0.27	1.95e-05	0.000212	1299.33	1275.57	1623	1491.99	Intron (uc007uum.2/211712, intron 2 of 3)	14	93013700	93888888	875189	2	211712	uc007uum.2	420966	ENSMUSG00000055421	Pcdh9	protocadherin 9	uc007uum.2;uc011zpc.2;uc057kth.1;uc007uun.2;uc007uuo.2	211712;211712;211712;211712;211712	0;0;0;0;0
chr17	27650716	27660383	9668	*	7.27	7.62	6.8	0.81	1.95e-05	0.000212	190.76	202.14	97	126.41	Promoter (<=1kb)	17	27655591	27711117	55527	1	23969	uc008bpj.2	0	ENSMUSG00000040276	Pacsin1	protein kinase C and casein kinase substrate in neurons 1	uc008bpj.2;uc008bpk.2;uc008bpl.2	23969;23969;23969	0;0;0
chr8	19530992	19538049	7058	*	7	7.37	6.51	0.85	1.96e-05	0.000213	163.45	166.83	93	89.91	Distal Intergenic	8	19495097	19497775	2679	1	246080	uc009lar.1	35895	ENSMUSG00000037790	Defb7	defensin beta 7	NA	NA	NA
chr7	47130908	47136510	5603	*	6.92	7.29	6.41	0.88	1.98e-05	0.000215	162.21	151	88	81.9	Promoter (<=1kb)	7	47077798	47132598	54801	2	19259	uc009gzz.3	0	ENSMUSG00000030854	Ptpn5	protein tyrosine phosphatase, non-receptor type 5	uc009gzz.3;uc009haa.3;uc009hab.3;uc009hac.1	19259;19259;19259;19259	0;0;0;0
chr16	43975612	43984475	8864	*	7.32	7.65	6.89	0.76	1.98e-05	0.000215	198.21	203.36	117	120.18	Promoter (<=1kb)	16	43969146	43979077	9932	2	332175	uc007zgp.1	0	ENSMUSG00000036304	Zdhhc23	zinc finger, DHHC domain containing 23	uc007zgt.2;uc012afw.1;uc007zgp.1;uc007zgq.1;uc012afu.1;uc012afv.1;uc057bij.1;uc007zgr.1	207798;207798;332175;332175;332175;332175;332175;332175	0;0;0;0;0;0;0;0
chr18	36802575	36856980	54406	*	9.8	9.96	9.62	0.34	2.02e-05	0.000218	1046.09	946.18	789	781.6	Promoter (<=1kb)	18	36801763	36802107	345	1	378472	uc012bbu.1	812	NA	Vaultrc5	vault RNA component 5	uc012bbu.1;uc008eos.1	378472;66492	812;8652
chr8	27327568	27484435	156868	*	11.62	11.71	11.53	0.18	2.02e-05	0.000219	3343.1	3367.03	2927	2996.44	Promoter (<=1kb)	8	27368711	27396276	27566	1	108043	uc009lis.1	0	ENSMUSG00000031492	Chrnb3	cholinergic receptor, nicotinic, beta polypeptide 3	uc009lis.1;uc009lit.2;uc009liu.2;uc009liv.1;uc009lir.1;uc009liw.1;uc009lix.1	108043;108043;108043;11440;541463;70952;70952	0;0;0;0;0;0;0
chr11	48846198	48880039	33842	*	8.93	9.14	8.68	0.47	2.04e-05	0.00022	569.8	560.16	374	444.21	Promoter (<=1kb)	11	48865249	48871346	6098	2	15944	uc007ipg.1	0	ENSMUSG00000046879	Irgm1	immunity-related GTPase family M member 1	uc007ipg.1;uc007ipd.2;uc057kku.1	15944;94089;94089	0;0;0
chr10	106800946	106837056	36111	*	9.13	8.9	9.33	-0.42	2.05e-05	0.000221	454.35	502.92	668	615.13	Exon (uc007gyr.2/327814, exon 8 of 32)	10	106470310	106933468	463159	1	327814	uc007gyr.2	330636	ENSMUSG00000053825	Ppfia2	protein tyrosine phosphatase, receptor type, f polypeptide (PTPRF), interacting protein (liprin), alpha 2	uc007gyr.2;uc007gys.2	327814;327814	0;0
chr12	84872273	84882278	10006	*	7.43	7.76	7.01	0.75	2.08e-05	0.000224	214.35	218.58	116	141.54	Promoter (<=1kb)	12	84875802	84879755	3954	1	100303738	uc011ype.1	0	ENSMUSG00000092130	D030025P21Rik	RIKEN cDNA D030025P21 gene	uc011ype.1;uc011ypd.1;uc007ofx.1	100303738;16997;16997	0;0;0
chr1	9545419	9550425	5007	*	6.56	7	5.95	1.05	2.09e-05	0.000225	120	135.17	52	71.22	Promoter (<=1kb)	1	9548046	9577968	29923	1	76187	uc007agl.2	0	ENSMUSG00000025911	Adhfe1	alcohol dehydrogenase, iron containing, 1	uc007agk.2;uc007agl.2;uc007agm.2	59014;76187;76187	0;0;0
chr10	113336590	113371493	34904	*	9.02	8.8	9.21	-0.42	2.1e-05	0.000226	440.7	448.73	600	586.65	Distal Intergenic	10	112925428	112929026	3599	2	382423	uc007has.1	-407564	ENSMUSG00000074748	Atxn7l3b	ataxin 7-like 3B	NA	NA	NA
chr6	103919348	103944938	25591	*	8.53	8.26	8.76	-0.49	2.11e-05	0.000228	309.94	304.43	438	427.3	Distal Intergenic	6	103697767	103733035	35269	1	12661	uc009dcn.1	221581	ENSMUSG00000030077	Chl1	cell adhesion molecule L1-like	NA	NA	NA
chr5	73645406	73656413	11008	*	7.78	8.07	7.42	0.65	2.12e-05	0.000228	261.94	275.21	182	159.35	Promoter (<=1kb)	5	73632749	73647731	14983	2	24051	uc008xtb.1	0	ENSMUSG00000029156	Sgcb	sarcoglycan, beta (dystrophin-associated glycoprotein)	uc008xtb.1;uc008xtc.2;uc008xte.2;uc008xtd.2;uc012dxe.1	24051;73472;73472;73472;73472	0;0;0;-1082;-2815
chr3	62336731	62344666	7936	*	7.22	7.56	6.77	0.79	2.13e-05	0.000229	198.21	179.62	105	113.06	Promoter (<=1kb)	3	62338777	62462221	123445	1	622434	uc008pjm.1	0	ENSMUSG00000036885	Arhgef26	Rho guanine nucleotide exchange factor (GEF) 26	uc008pjm.1	622434	0
chr6	88718555	88729418	10864	*	7.5	7.82	7.09	0.73	2.13e-05	0.000229	211.87	238.68	130	141.54	Promoter (<=1kb)	6	88724412	88828360	103949	1	23945	uc009cvo.2	0	ENSMUSG00000033174	Mgll	monoglyceride lipase	uc009cvo.2;uc009cvp.2;uc009cvq.2;uc009cvr.2	23945;23945;23945;23945	0;0;0;0
chr6	124950756	124956102	5347	*	6.53	6.97	5.9	1.07	2.14e-05	0.00023	119.59	131.52	48	71.22	Downstream (2-3kb)	6	124958807	124965397	6591	2	26894	uc009dss.2	9295	ENSMUSG00000030127	Cops7a	COP9 signalosome subunit 7A	uc009dsr.2;uc009dss.2	26894;26894	9427;9295
chr19	5739380	5758290	18911	*	8.25	8.51	7.93	0.59	2.16e-05	0.000232	367.87	362.88	218	268.84	Promoter (<=1kb)	19	5740904	5754330	13427	1	16998	uc008gfe.1	0	ENSMUSG00000024940	Ltbp3	latent transforming growth factor beta binding protein 3	uc008gfe.1;uc008gff.1;uc008gfg.1;uc008gfh.1;uc008gfi.1;uc012bhd.1	16998;16998;16998;78891;78891;78891	0;0;0;13111;13111;13111
chr1	166998486	167009338	10853	*	7.45	7.76	7.04	0.72	2.2e-05	0.000235	222.62	211.89	128	135.31	Promoter (<=1kb)	1	166974023	166999730	25708	2	100503962	uc007dkr.2	0	ENSMUSG00000102548	Gm16701	predicted gene, 16701	uc007dkr.2;uc007dks.2;uc007dkt.2;uc011wvo.1	100503962;226610;226610;226610	0;0;0;0
chr18	36194049	36208342	14294	*	7.75	8.04	7.37	0.67	2.2e-05	0.000236	247.04	280.08	161	170.03	Promoter (<=1kb)	18	36017649	36197160	179512	2	100042150	uc012bbl.2	0	ENSMUSG00000060275	Nrg2	neuregulin 2	uc012bbl.2	100042150	0
chr16	35820468	35829535	9068	*	7.37	7.69	6.94	0.75	2.21e-05	0.000237	219.31	194.84	129	116.62	3' UTR	16	35770386	35828462	58077	1	66667	uc007zbq.1	50082	ENSMUSG00000022849	Hspbap1	Hspb associated protein 1	uc007zbs.2;uc012afb.1;uc007zbq.1;uc007zbr.1;uc012afa.1	547253;547253;66667;66667;66667	41847;41847;0;0;0
chr2	82260874	82292810	31937	*	8.95	8.71	9.14	-0.43	2.24e-05	0.000239	402.63	437.17	565	567.06	Distal Intergenic	2	82235173	82259879	24707	1	241514	uc008khv.2	25701	ENSMUSG00000070866	Zfp804a	zinc finger protein 804A	uc008khu.2;uc008khv.2	241514;241514	0;0
chr6	28825231	28836635	11405	*	7.41	7.73	7	0.73	2.25e-05	0.000241	216.42	208.23	123	132.64	Promoter (<=1kb)	6	28828126	28831747	3622	2	192198	uc009bcu.1	0	ENSMUSG00000049939	Lrrc4	leucine rich repeat containing 4	uc009bcu.1;uc012eiu.1;uc009bct.1	192198;56463;56463	0;0;0
chr12	16649067	16659862	10796	*	7.4	7.72	6.99	0.73	2.26e-05	0.000242	217.66	204.58	132	121.96	Promoter (<=1kb)	12	16653470	16660236	6767	1	18217	uc007nbw.1	0	ENSMUSG00000020591	Ntsr2	neurotensin receptor 2	uc007nbw.1;uc007nbx.1;uc007nby.1	18217;18217;18217	0;0;0
chr14	96411976	96453307	41332	*	9.4	9.2	9.58	-0.38	2.29e-05	0.000244	598.36	575.99	800	729.08	Intron (uc007uuq.1/93688, intron 1 of 10)	14	96105265	96519034	413770	2	93688	uc007uuq.1	65727	ENSMUSG00000022076	Klhl1	kelch-like 1	uc007uuq.1	93688	0
chr7	138917608	138945177	27570	*	8.7	8.92	8.44	0.47	2.33e-05	0.000248	471.73	493.79	351	344.51	Promoter (<=1kb)	7	138940730	139083976	143247	1	74004	uc029wpf.2	0	NA	Jakmip3	janus kinase and microtubule interacting protein 3	uc029wpf.2	74004	0
chr10	81331920	81346137	14218	*	7.89	8.17	7.55	0.62	2.34e-05	0.000249	293.8	281.9	179	194.96	Promoter (<=1kb)	10	81337762	81343266	5505	2	209047	uc007ghi.1	0	ENSMUSG00000034872	Gipc3	GIPC PDZ domain containing family, member 3	uc007ghj.2;uc007ghl.2;uc007ghk.2;uc007ghm.2;uc007ghn.2;uc007ghi.1;uc007ghg.2;uc007ghh.2	15353;15353;15353;15353;15353;209047;21390;21390	0;0;0;0;0;0;0;0
chr18	26943816	26992582	48767	*	9.46	9.26	9.63	-0.36	2.36e-05	0.000251	628.56	601.56	792	788.73	Distal Intergenic	18	25677880	25753983	76104	2	108013	uc012baq.1	-1189833	ENSMUSG00000024268	Celf4	CUGBP, Elav-like family member 4	NA	NA	NA
chr14	103840249	103847831	7583	*	7.4	7.73	6.97	0.76	2.36e-05	0.000251	195.31	230.15	126	125.52	Promoter (<=1kb)	14	103814615	103843701	29087	2	13618	uc007uww.3	0	ENSMUSG00000022122	Ednrb	endothelin receptor type B	uc007uww.3;uc007uwy.2;uc007uwx.3	13618;13618;13618	0;0;0
chr16	20580215	20594129	13915	*	8.15	8.42	7.82	0.6	2.37e-05	0.000252	369.94	316	238	215.43	Promoter (<=1kb)	16	20589582	20598467	8886	1	328643	uc007yqb.1	0	ENSMUSG00000046613	Vwa5b2	von Willebrand factor A domain containing 5B2	uc007yqb.1;uc012acu.1;uc012acv.1	328643;328643;328643	0;0;0
chr9	114837606	114848401	10796	*	7.4	7.73	6.97	0.76	2.38e-05	0.000253	206.49	218.58	141	110.39	Promoter (<=1kb)	9	114789345	114844152	54808	2	70031	uc009ryg.1	0	ENSMUSG00000041012	Cmtm8	CKLF-like MARVEL transmembrane domain containing 8	uc009ryg.1	70031	0
chr19	48200197	48215671	15475	*	8.02	8.29	7.69	0.6	2.39e-05	0.000254	325.25	300.78	197	215.43	Promoter (<=1kb)	19	48206025	48805505	599481	1	66673	uc008hvx.1	0	ENSMUSG00000063434	Sorcs3	sortilin-related VPS10 domain containing receptor 3	uc008hvx.1	66673	0
chr4	101283988	101297597	13610	*	7.87	8.15	7.52	0.64	2.41e-05	0.000255	282.21	286.78	199	167.36	Distal Intergenic	4	101151974	101265282	113309	2	16451	uc008tvk.1	-18706	ENSMUSG00000028530	Jak1	Janus kinase 1	NA	NA	NA
chr18	78044158	78053155	8998	*	7.42	7.74	6.99	0.75	2.41e-05	0.000255	220.14	208.23	114	140.65	Exon (uc008fsb.1/620235, exon 2 of 6)	18	78043614	78057268	13655	2	620235	uc008fsb.1	4113	ENSMUSG00000091055	Siglec15	sialic acid binding Ig-like lectin 15	uc008fsb.1	620235	0
chr1	75386932	75390455	3524	*	6.22	6.68	5.53	1.14	2.44e-05	0.000258	95.59	108.99	50	42.73	5' UTR	1	75375297	75432314	57018	1	11790	uc007boz.2	11635	ENSMUSG00000026207	Speg	SPEG complex locus	uc007boz.2;uc007bpa.1;uc007bpb.1;uc007bpc.2	11790;11790;11790;11790	0;0;0;0
chr2	181444180	181461712	17533	*	8.17	8.43	7.86	0.57	2.45e-05	0.000259	334.76	353.75	225	238.58	Promoter (<=1kb)	2	181410545	181459426	48882	2	72147	uc008omh.3	0	ENSMUSG00000027583	Zbtb46	zinc finger and BTB domain containing 46	uc008omh.3;uc008omi.1	72147;72147	0;0
chr8	66002428	66105251	102824	*	11.01	10.9	11.11	-0.22	2.49e-05	0.000263	1865.41	1945.94	2229	2206.83	Intron (uc009lvj.2/72925, intron 3 of 8)	8	65618040	66471637	853598	1	72925	uc009lvj.2	384388	ENSMUSG00000036469	2020-03-01	membrane-associated ring finger (C3HC4) 1	uc009lvj.2;uc009lvk.2;uc009lvl.2	72925;72925;72925	0;0;0
chr19	38093615	38102549	8935	*	7.2	7.56	6.7	0.86	2.5e-05	0.000264	195.31	183.27	84	124.63	Promoter (<=1kb)	19	38097079	38114263	17185	1	107221	uc008hjc.1	0	ENSMUSG00000054200	Ffar4	free fatty acid receptor 4	uc008hjc.1	107221	0
chr4	136937967	136959232	21266	*	8.23	8.48	7.92	0.56	2.52e-05	0.000265	347.59	365.93	246	239.47	Promoter (<=1kb)	4	136929419	136956816	27398	2	13842	uc008vis.1	0	ENSMUSG00000028661	Epha8	Eph receptor A8	uc008vis.1	13842	0
chr11	68424223	68447993	23771	*	8.51	8.74	8.23	0.5	2.52e-05	0.000265	431.59	421.34	294	308.01	Promoter (<=1kb)	11	68432125	68476764	44640	1	320207	uc007jnn.1	0	ENSMUSG00000020901	Pik3r5	phosphoinositide-3-kinase regulatory subunit 5	uc007jnn.1;uc007jno.1	320207;320207	0;0
chr5	128428880	128437974	9095	*	7.14	7.49	6.69	0.8	2.53e-05	0.000266	179.18	180.22	107	99.7	Promoter (<=1kb)	5	127783491	128433077	649587	2	243274	uc008zse.1	0	ENSMUSG00000034310	Tmem132d	transmembrane protein 132D	uc008zse.1	243274	0
chr10	106727795	106751937	24143	*	8.56	8.29	8.78	-0.48	2.55e-05	0.000268	307.87	320.26	434	444.21	Exon (uc007gyr.2/327814, exon 4 of 32)	10	106470310	106933468	463159	1	327814	uc007gyr.2	257485	ENSMUSG00000053825	Ppfia2	protein tyrosine phosphatase, receptor type, f polypeptide (PTPRF), interacting protein (liprin), alpha 2	uc007gyr.2;uc007gys.2	327814;327814	0;0
chr10	30836363	30865479	29117	*	8.93	9.13	8.69	0.44	2.55e-05	0.000268	576.84	544.94	432	395.25	Promoter (<=1kb)	10	30832359	30842783	10425	2	15214	uc007etp.1	0	ENSMUSG00000019789	Hey2	hairy/enhancer-of-split related with YRPW motif 2	uc007etp.1	15214	0
chr10	110900547	110919028	18482	*	8.36	8.6	8.08	0.53	2.55e-05	0.000268	400.97	377.5	267	272.4	Promoter (1-2kb)	10	110920176	110939514	19339	1	13008	uc007gzs.2	-1148	ENSMUSG00000020186	Csrp2	cysteine and glycine-rich protein 2	uc007gzs.2;uc007gzq.2;uc007gzr.2	13008;75630;75630	-1148;0;0
chr3	127779041	127798513	19473	*	8.3	8.55	8.01	0.54	2.57e-05	0.000269	370.35	378.11	269	244.81	Promoter (<=1kb)	3	127789913	127798389	8477	1	211550	uc008rhm.1	0	ENSMUSG00000046688	Tifa	TRAF-interacting protein with forkhead-associated domain	uc008rhm.1;uc008rhn.1;uc008rho.1;uc012cxm.1;uc008rhl.1	211550;211550;211550;71481;71481	0;0;0;0;0
chr8	116497866	116559115	61250	*	10.16	10.29	10.01	0.29	2.63e-05	0.000276	1274.51	1235.39	1026	1032.64	Promoter (<=1kb)	8	116505015	116515915	10901	1	75465	uc009nog.1	0	ENSMUSG00000034467	Dynlrb2	dynein light chain roadblock-type 2	uc009nog.1;uc009noh.1	75465;75465	0;0
chr1	132755607	132791741	36135	*	9.06	9.25	8.83	0.41	2.64e-05	0.000277	600.84	615.56	448	464.69	Distal Intergenic	1	132599846	132741797	141952	2	269116	uc007cpg.2	-13810	ENSMUSG00000026442	Nfasc	neurofascin	NA	NA	NA
chr15	86182719	86187504	4786	*	6.08	6.56	5.37	1.19	2.66e-05	0.000278	94.35	93.77	47	35.61	Promoter (<=1kb)	15	86139101	86186141	47041	2	223753	uc007xdy.2	0	ENSMUSG00000035891	Cerk	ceramide kinase	uc007xdy.2	223753	0
chr14	89906115	89961864	55750	*	9.86	9.69	10.01	-0.32	2.66e-05	0.000278	818.08	835.36	1066	996.14	Distal Intergenic	14	89896224	89899447	3224	1	328451	uc007uui.2	9891	NA	Gm5088	poly(A)-binding protein, cytoplasmic pseudogene	NA	NA	NA
chr9	64371928	64389640	17713	*	8.19	8.45	7.87	0.58	2.68e-05	0.00028	331.04	368.36	228	241.25	Promoter (<=1kb)	9	64385626	64649845	264220	1	214058	uc009qby.2	0	ENSMUSG00000036466	Megf11	multiple EGF-like-domains 11	uc009qby.2;uc012gvd.2;uc009qbz.2;uc009qca.2;uc012gve.1	214058;214058;214058;214058;214058	0;0;0;0;0
chr3	114106249	114142211	35963	*	9.09	8.87	9.28	-0.41	2.72e-05	0.000284	462.63	473.7	647	596.44	Exon (uc008rbk.2/12814, exon 15 of 67)	3	114030540	114220756	190217	1	12814	uc008rbk.2	75709	ENSMUSG00000027966	Col11a1	collagen, type XI, alpha 1	uc008rbk.2	12814	0
chr1	148901567	148934356	32790	*	8.96	8.73	9.15	-0.42	2.73e-05	0.000285	431.59	417.68	569	567.95	Distal Intergenic	1	149829618	149922439	92822	2	18783	uc056yeg.2	988083	ENSMUSG00000056220	Pla2g4a	phospholipase A2, group IVA (cytosolic, calcium-dependent)	NA	NA	NA
chr11	75192082	75197023	4942	*	6.48	6.9	5.87	1.03	2.78e-05	0.00029	117.52	121.16	54	63.2	Promoter (<=1kb)	11	75193993	75267762	73770	1	237847	uc007kdh.1	0	ENSMUSG00000045287	Rtn4rl1	reticulon 4 receptor-like 1	uc007kdh.1;uc007kdg.1	237847;246257	0;0
chr8	124941345	124982201	40857	*	9.46	9.63	9.27	0.36	2.79e-05	0.000291	780.43	807.36	621	616.02	Promoter (<=1kb)	8	124908587	124949254	40668	2	112405	uc012gna.1	0	ENSMUSG00000031987	Egln1	egl-9 family hypoxia-inducible factor 1	uc012gna.1	112405	0
chr3	155412029	155451601	39573	*	9.17	8.95	9.36	-0.4	2.8e-05	0.000291	496.15	495.01	687	623.15	Distal Intergenic	3	155093434	155194278	100845	1	74435	uc008rux.1	318595	ENSMUSG00000028182	Lrriq3	leucine-rich repeats and IQ motif containing 3	NA	NA	NA
chr8	103761427	104014005	252579	*	12.21	12.29	12.13	0.16	2.82e-05	0.000294	4983.4	5045.67	4348	4634.43	Distal Intergenic	8	104101625	104144502	42878	1	12562	uc009mzx.2	-87620	ENSMUSG00000031871	Cdh5	cadherin 5	NA	NA	NA
chr4	125269205	125283989	14785	*	7.84	8.12	7.48	0.64	2.84e-05	0.000295	265.66	291.04	172	186.05	Distal Intergenic	4	125126367	125127881	1515	2	230738	uc008ury.2	-141324	ENSMUSG00000042677	Zc3h12a	zinc finger CCCH type containing 12A	NA	NA	NA
chr16	26952778	26977667	24890	*	8.78	8.99	8.54	0.46	2.86e-05	0.000297	530.49	489.53	370	373	Promoter (<=1kb)	16	26957235	26968245	11011	2	239789	uc007yvi.1	0	ENSMUSG00000068428	Gmnc	geminin coiled-coil domain containing	uc007yvi.1;uc007yvj.2;uc007yvk.2	239789;239789;239789	0;0;0
chr3	98369986	98384521	14536	*	7.77	8.05	7.41	0.64	2.89e-05	0.0003	260.69	269.12	171	170.03	Promoter (<=1kb)	3	98382481	98412743	30263	1	242109	uc008qpt.2	0	ENSMUSG00000050064	Zfp697	zinc finger protein 697	uc008qpt.2;uc012cui.1	242109;242109	0;0
chr9	118383968	118391805	7838	*	7.21	7.55	6.76	0.79	2.91e-05	0.000302	176.28	198.49	103	113.06	Distal Intergenic	9	118429839	118437048	7210	1	71196	uc029xgn.1	-38034	ENSMUSG00000111843	4933432G23Rik	RIKEN cDNA 4933432G23 gene	NA	NA	NA
chr1	21734166	21765586	31421	*	8.87	8.63	9.07	-0.44	2.93e-05	0.000304	411.73	382.37	538	538.58	Intron (uc007alq.3/226922, intron 1 of 13)	1	21398399	21962650	564252	2	226922	uc007alq.3	197064	ENSMUSG00000028033	Kcnq5	potassium voltage-gated channel, subfamily Q, member 5	uc007alq.3;uc009uzv.2;uc011wio.2	226922;226922;226922	0;0;0
chr1	135679515	135707147	27633	*	8.64	8.86	8.38	0.48	2.94e-05	0.000304	480.01	446.3	340	324.04	5' UTR	1	135729197	135752229	23033	1	13007	uc007cto.1	-22050	ENSMUSG00000026421	Csrp1	cysteine and glycine-rich protein 1	NA	NA	NA
chr2	132026000	132035428	9429	*	7.45	7.76	7.05	0.71	2.95e-05	0.000305	223.87	209.45	135	129.97	Promoter (<=1kb)	2	131992850	132029988	37139	2	215653	uc008mmf.2	0	ENSMUSG00000027339	Rassf2	Ras association (RalGDS/AF-6) domain family member 2	uc008mmf.2;uc008mmg.1	215653;215653	0;-4827
chr4	50955057	50993505	38449	*	9.11	8.9	9.3	-0.4	2.99e-05	0.000309	487.04	466.39	648	613.35	Distal Intergenic	4	51216678	51229928	13251	1	74914	uc012dee.1	-223173	ENSMUSG00000039555	Cylc2	cylicin, basic protein of sperm head cytoskeleton 2	NA	NA	NA
chr8	75072106	75138990	66885	*	10.17	10.31	10.03	0.28	3e-05	0.00031	1269.95	1263.4	1034	1050.45	Promoter (<=1kb)	8	75093618	75100593	6976	1	15368	uc009mhc.2	0	ENSMUSG00000005413	Hmox1	heme oxygenase 1	uc009mhc.2;uc009mhd.2;uc009mhe.2;uc009mhf.1;uc009mha.2;uc012ggc.1;uc009mhb.2	15368;17218;17218;17218;21968;21968;21968	0;0;0;0;0;0;11792
chr8	84284942	84392830	107889	*	10.92	11.04	10.8	0.24	3.03e-05	0.000312	2032.18	2179.13	1732	1828.49	Distal Intergenic	8	84257767	84270402	12636	2	67736	uc012ghi.2	-14540	ENSMUSG00000004994	Ccdc130	coiled-coil domain containing 130	NA	NA	NA
chr2	18572892	18633829	60938	*	9.92	10.07	9.75	0.32	3.03e-05	0.000312	1040.3	1111.79	859	868.84	Exon (uc033hlo.1/uc033hlo.1, exon 1 of 1)	2	18672462	18676216	3755	1	12238	uc008ilx.1	-38633	ENSMUSG00000051154	Commd3	COMM domain containing 3	NA	NA	NA
chr6	118475913	118486857	10945	*	7.68	7.98	7.31	0.67	3.04e-05	0.000313	240	264.25	153	164.69	Promoter (<=1kb)	6	118461950	118479273	17324	2	22750	uc009dlq.1	0	ENSMUSG00000072623	Zfp9	zinc finger protein 9	uc009dlq.1	22750	0
chr6	53812051	53825771	13721	*	7.99	8.26	7.65	0.61	3.05e-05	0.000313	326.07	286.78	191	210.09	Promoter (<=1kb)	6	53815468	53820825	5358	2	66873	uc009bzk.2	0	ENSMUSG00000043496	Tril	TLR4 interactor with leucine-rich repeats	uc009bzk.2	66873	0
chr10	3364081	3369423	5343	*	6.89	7.26	6.39	0.87	3.05e-05	0.000314	155.18	151	86	81.9	Promoter (<=1kb)	10	3366150	3464975	98826	1	76142	uc007ehq.1	0	ENSMUSG00000040653	Ppp1r14c	protein phosphatase 1, regulatory inhibitor subunit 14C	uc007ehq.1;uc007ehr.1	76142;76142	0;0
chr17	69068912	69083651	14740	*	7.9	8.18	7.56	0.62	3.06e-05	0.000315	306.21	272.77	188	189.61	Distal Intergenic	17	69156810	69272848	116039	1	13823	uc008dko.1	-73159	ENSMUSG00000024044	Epb41l3	erythrocyte membrane protein band 4.1 like 3	NA	NA	NA
chr8	54150240	54296920	146681	*	11.56	11.46	11.65	-0.18	3.09e-05	0.000317	2772.46	2873.24	3271	3146.89	3' UTR	8	54077532	54180808	103277	1	22341	uc029wsy.1	72708	ENSMUSG00000031520	Vegfc	vascular endothelial growth factor C	uc029wsy.1;uc009lsc.1;uc012gdx.1	22341;22341;22341	0;0;0
chr8	39030953	39132045	101093	*	10.87	10.75	10.98	-0.23	3.1e-05	0.000318	1719.34	1721.26	2072	1961.13	5' UTR	8	39005867	39073322	67456	1	80286	uc009lmf.1	25086	ENSMUSG00000039530	Tusc3	tumor suppressor candidate 3	uc009lmf.1;uc029wsp.1;uc029wso.2	80286;80286;80286	0;0;0
chr16	75117096	75152915	35820	*	9.07	8.86	9.26	-0.41	3.11e-05	0.000318	463.87	462.74	635	592.88	Distal Intergenic	16	75540514	75586061	45548	2	320355	uc007zrn.4	433146	ENSMUSG00000032948	Lipi	lipase, member I	NA	NA	NA
chr14	107880261	107906162	25902	*	8.66	8.4	8.88	-0.47	3.12e-05	0.000319	341.8	334.88	494	445.99	Distal Intergenic	14	108909988	108914239	4252	2	76965	uc007uyc.2	1008077	ENSMUSG00000075478	Slitrk1	SLIT and NTRK-like family, member 1	NA	NA	NA
chr2	25394744	25404220	9477	*	7.34	7.66	6.92	0.74	3.14e-05	0.000322	201.93	202.75	128	114.84	Promoter (<=1kb)	2	25395874	25401323	5450	1	12496	uc008irw.2	0	ENSMUSG00000015085	Entpd2	ectonucleoside triphosphate diphosphohydrolase 2	uc008irw.2;uc008irx.2;uc008iry.1	12496;18146;18146	0;0;-2806
chr8	85350608	85512768	162161	*	11.53	11.61	11.43	0.18	3.17e-05	0.000324	3123.37	3140.53	2783	2746.3	Promoter (<=1kb)	8	85492617	85524834	32218	1	108682	uc009mpx.1	0	ENSMUSG00000031700	Gpt2	glutamic pyruvate transaminase (alanine aminotransferase) 2	uc009mpx.1;uc009mpy.1;uc009mps.1;uc009mpt.2;uc012ghr.1;uc009mpv.2;uc009mpw.2	108682;108682;213435;213435;213435;66714;66714	0;0;0;0;0;0;0
chr12	71300226	71322977	22752	*	8.65	8.87	8.39	0.48	3.17e-05	0.000324	460.97	472.48	350	321.37	Promoter (<=1kb)	12	71309884	71320107	10224	1	59036	uc007nup.2	0	ENSMUSG00000044548	Dact1	dishevelled-binding antagonist of beta-catenin 1	uc007nup.2;uc007nuq.2	59036;59036	0;0
chr13	48260106	48266505	6400	*	7	7.36	6.52	0.84	3.19e-05	0.000326	164.28	164.39	100	83.68	Promoter (<=1kb)	13	48261427	48264036	2610	1	15904	uc007qid.1	0	ENSMUSG00000021379	Id4	inhibitor of DNA binding 4	uc007qid.1;uc007qib.1	15904;320614	0;0
chr12	48793798	48839823	46026	*	9.4	9.2	9.56	-0.36	3.25e-05	0.000331	588.42	589.99	734	780.71	Distal Intergenic	12	49382883	49386867	3985	1	15228	uc011ylr.1	-543060	ENSMUSG00000020950	Foxg1	forkhead box G1	NA	NA	NA
chr8	22493382	22500069	6688	*	6.81	7.19	6.29	0.9	3.27e-05	0.000334	144.83	147.35	73	83.68	Intron (uc009ldf.2/20516, intron 1 of 10)	8	22476700	22569616	92917	1	20516	uc009ldf.2	16682	ENSMUSG00000037656	Slc20a2	solute carrier family 20, member 2	uc009ldf.2	20516	0
chr12	24678517	24690543	12027	*	7.65	7.95	7.28	0.66	3.28e-05	0.000334	237.11	256.33	152	159.35	Promoter (<=1kb)	12	24665838	24681795	15958	2	12879	uc007nep.1	0	ENSMUSG00000062563	Cys1	cystin 1	uc007nep.1;uc007neq.1;uc011yla.1	12879;12879;12879	0;0;0
chr18	48473807	48492510	18704	*	8.29	8.01	8.53	-0.53	3.28e-05	0.000334	264	250.85	371	370.33	Distal Intergenic	18	48045335	48048379	3045	1	433182	uc008ewh.2	428472	ENSMUSG00000059040	Eno1b	enolase 1B, retrotransposed	NA	NA	NA
chr4	27772580	27825350	52771	*	9.62	9.44	9.79	-0.35	3.29e-05	0.000335	706.36	683.15	924	843.92	Distal Intergenic	4	28813131	28873801	60671	1	13841	uc008sel.3	-987781	ENSMUSG00000028289	Epha7	Eph receptor A7	NA	NA	NA
chr1	7291347	7304582	13236	*	7.72	8.01	7.36	0.65	3.3e-05	0.000335	259.04	255.72	155	173.59	Distal Intergenic	1	7160085	7173628	13544	1	319263	uc007agd.1	131262	ENSMUSG00000051285	Pcmtd1	protein-L-isoaspartate (D-aspartate) O-methyltransferase domain containing 1	NA	NA	NA
chr10	22149012	22191146	42135	*	9.43	9.59	9.23	0.36	3.32e-05	0.000337	788.7	757.43	600	604.45	Promoter (<=1kb)	10	22158586	22374139	215554	1	19368	uc007epe.2	0	ENSMUSG00000078452	Raet1a	retinoic acid early transcript 1, alpha	uc007epe.2;uc057kib.1;uc029qwb.1;uc007epc.2;uc011xbj.2;uc007epd.2;uc011xbk.2;uc007epf.1;uc011xbl.2	19368;19370;319887;319887;379043;379043;379043;379043;667281	0;0;0;0;0;0;0;0;0
chr14	61039836	61066343	26508	*	8.69	8.91	8.42	0.48	3.33e-05	0.000338	480.42	481	317	370.33	Promoter (<=1kb)	14	60963834	61046855	83022	2	29820	uc007ufj.2	0	ENSMUSG00000060548	Tnfrsf19	tumor necrosis factor receptor superfamily, member 19	uc007ufi.2;uc007ufj.2;uc007ufl.2;uc007ufm.2;uc007ufn.2	29820;29820;29820;29820;29820	-1849;0;-1849;0;0
chr17	20470352	20501567	31216	*	8.93	8.71	9.13	-0.42	3.36e-05	0.00034	410.9	425.6	574	545.7	Promoter (<=1kb)	17	20462373	20481236	18864	2	627805	uc009vbl.1	0	ENSMUSG00000091805	Vmn2r108	vomeronasal 2, receptor 108	uc008aqa.1;uc009vbl.1	171228;627805	-732;0
chr14	114519716	114611840	92125	*	10.5	10.37	10.62	-0.25	3.4e-05	0.000344	1329.96	1316.98	1587	1560.54	Distal Intergenic	14	114831965	114861327	29363	1	75822	uc029smy.1	-220125	ENSMUSG00000115320	4930524C18Rik	RIKEN cDNA 4930524C18 gene	NA	NA	NA
chr15	46223173	46286685	63513	*	9.92	9.74	10.07	-0.33	3.44e-05	0.000348	843.33	870.07	1151	1005.05	Distal Intergenic	15	46324585	46338618	14034	1	71120	uc029sow.1	-37900	ENSMUSG00000099751	1700022A22Rik	RIKEN cDNA 1700022A22 gene	NA	NA	NA
chr3	102008375	102021143	12769	*	7.92	8.19	7.59	0.6	3.46e-05	0.00035	302.49	283.12	200	186.05	Promoter (<=1kb)	3	102010145	102015492	5348	1	18072	uc008qrq.2	0	ENSMUSG00000048540	Nhlh2	nescient helix loop helix 2	uc008qrq.2;uc008qro.2	18072;18072	0;0
chr6	70950808	70962752	11945	*	7.82	8.1	7.47	0.64	3.47e-05	0.00035	287.18	262.42	191	162.91	Promoter (<=1kb)	6	70956606	70961066	4461	1	232077	uc012ene.1	0	ENSMUSG00000055874	Foxi3	forkhead box I3	uc012ene.1	232077	0
chr7	73998286	74018603	20318	*	8.29	8.54	8	0.54	3.5e-05	0.000353	362.08	381.15	269	242.14	Promoter (<=1kb)	7	73939119	74013682	74564	2	20450	uc009hwe.3	0	ENSMUSG00000025789	St8sia2	ST8 alpha-N-acetyl-neuraminide alpha-2,8-sialyltransferase 2	uc009hwe.3	20450	0
chr13	89091362	89103008	11647	*	7.55	7.16	7.85	-0.69	3.51e-05	0.000354	141.52	144.91	252	209.2	3' UTR	13	88821472	89096508	275037	1	13612	uc007rjb.2	269890	ENSMUSG00000034488	Edil3	EGF-like repeats and discoidin I-like domains 3	uc007rjb.2;uc007rjc.2;uc007rjd.2;uc007rje.2	13612;13612;13612;13612	0;0;0;0
chr14	94245706	94303560	57855	*	9.85	9.68	9.99	-0.31	3.51e-05	0.000354	823.88	818.92	995	1041.54	Distal Intergenic	14	93013700	93890669	876970	2	211712	uc007uuo.2	-355037	ENSMUSG00000055421	Pcdh9	protocadherin 9	NA	NA	NA
chr1	171107789	171114809	7021	*	6.66	7.06	6.12	0.95	3.62e-05	0.000364	125.8	141.26	71	67.66	Exon (uc033fnv.1/uc033fnv.1, exon 1 of 1)	1	171121661	171126967	5307	1	75472	uc007dna.1	-6852	ENSMUSG00000026649	Cfap126	cilia and flagella associated protein 126	NA	NA	NA
chr10	90965354	90972751	7398	*	7.18	7.52	6.73	0.79	3.63e-05	0.000366	197.8	169.26	110	102.37	3' UTR	10	89873509	90972985	1099477	1	77531	uc057kjj.1	1091845	ENSMUSG00000058589	Anks1b	ankyrin repeat and sterile alpha motif domain containing 1B	uc057kjj.1;uc033fsd.2;uc033fsa.2;uc033fsb.2;uc033fsc.2	77531;77531;77531;77531;77531	0;0;0;0;0
chr15	14321860	14377865	56006	*	9.71	9.52	9.88	-0.36	3.67e-05	0.000369	706.36	765.95	1011	877.75	Distal Intergenic	15	13059251	13173675	114425	2	12563	uc007vig.2	-1148185	ENSMUSG00000039385	Cdh6	cadherin 6	NA	NA	NA
chr11	101078982	101082154	3173	*	6.1	6.56	5.42	1.14	3.69e-05	0.000371	96	93.16	44	41.84	Promoter (<=1kb)	11	101078411	101080505	2095	1	15485	uc007lnb.1	571	ENSMUSG00000019301	Hsd17b1	hydroxysteroid (17-beta) dehydrogenase 1	uc007lnb.1;uc007lmz.3;uc007lna.3;uc007lnc.2;uc007lnd.2	15485;27419;27419;71743;71743	0;9105;8888;-411;-462
chr1	79662314	79675019	12706	*	7.55	7.85	7.16	0.69	3.7e-05	0.000371	240	221.02	135	151.34	Promoter (<=1kb)	1	79606876	79671972	65097	2	252903	uc011wnw.1	0	ENSMUSG00000054702	Ap1s3	adaptor-related protein complex AP-1, sigma 3	uc011wnw.1	252903	0
chr19	29241731	29260477	18747	*	8.16	8.41	7.85	0.56	3.71e-05	0.000372	331.45	348.27	230	232.34	Promoter (<=1kb)	19	29251803	29313080	61278	1	16452	uc008hdb.2	0	ENSMUSG00000024789	Jak2	Janus kinase 2	uc008hdb.2;uc008hdc.2	16452;16452	0;0
chr9	46573407	46595290	21884	*	8.34	8.57	8.06	0.52	3.72e-05	0.000373	385.66	376.89	264	267.95	Distal Intergenic	9	46303361	46319986	16626	2	74361	uc012gsl.1	-253421	ENSMUSG00000056617	4931429L15Rik	RIKEN cDNA 4931429L15 gene	NA	NA	NA
chr15	99581846	99595306	13461	*	7.98	8.25	7.65	0.59	3.76e-05	0.000377	317.8	289.21	207	195.85	Promoter (<=1kb)	15	99591028	99594829	3802	1	11830	uc007xpt.1	0	ENSMUSG00000044217	Aqp5	aquaporin 5	uc007xps.2;uc007xpt.1;uc007xpu.1	11827;11830;11830	0;0;0
chr5	57698606	57753642	55037	*	9.99	10.14	9.81	0.33	3.81e-05	0.000382	1176.44	1079.52	954	843.92	Promoter (<=1kb)	5	57570084	57717919	147836	2	319216	uc008xls.1	0	ENSMUSG00000097216	4932441J04Rik	RIKEN cDNA 4932441J04 gene	uc008xls.1;uc008xlt.3;uc008xlu.3;uc008xlv.3;uc057bug.1	319216;54216;54216;54216;54216	0;0;0;0;0
chr1	178181875	178211052	29178	*	9.12	9.3	8.9	0.4	3.87e-05	0.000387	635.6	625.31	491	467.36	Promoter (<=1kb)	1	178187417	178252598	65182	1	78825	uc007dux.2	0	ENSMUSG00000026502	Desi2	desumoylating isopeptidase 2	uc007dux.2;uc011wxk.2	78825;78825	0;0
chr14	69189503	69209100	19598	*	8.34	8.58	8.05	0.52	3.91e-05	0.000391	380.7	382.98	278	253.71	Promoter (<=1kb)	14	69190692	69194658	3967	1	18095	uc007umd.1	0	ENSMUSG00000022061	Nkx3-1	NK3 homeobox 1	uc007umd.1	18095	0
chr11	94471187	94479069	7883	*	7.09	7.44	6.62	0.82	3.96e-05	0.000396	160.55	186.92	93	103.26	Promoter (<=1kb)	11	94408391	94474198	65808	2	12291	uc007kyr.2	0	ENSMUSG00000020866	Cacna1g	calcium channel, voltage-dependent, T type, alpha 1G subunit	uc007kyr.2;uc007kys.2;uc011ycv.1;uc011ycw.1;uc007kyt.1	12291;12291;12291;12291;217116	0;0;0;0;0
chr10	21680978	21712510	31533	*	8.89	9.09	8.65	0.44	4.02e-05	0.000402	555.32	533.98	378	424.63	Promoter (<=1kb)	10	21690845	21693978	3134	1	432436	uc007eot.1	0	ENSMUSG00000056716	Gm5420	predicted gene 5420	uc007eot.1	432436	0
chr10	36019405	36067586	48182	*	9.45	9.26	9.62	-0.36	4.06e-05	0.000405	599.6	627.74	810	760.24	Distal Intergenic	10	36506807	36834397	327591	1	319415	uc007evc.2	-439221	ENSMUSG00000044499	Hs3st5	heparan sulfate (glucosamine) 3-O-sulfotransferase 5	NA	NA	NA
chr4	32236037	32248203	12167	*	7.55	7.86	7.16	0.71	4.07e-05	0.000406	251.18	214.32	157	128.19	Promoter (<=1kb)	4	32238950	32563367	324418	1	12014	uc012dbf.1	0	ENSMUSG00000040270	Bach2	BTB and CNC homology, basic leucine zipper transcription factor 2	uc012dbf.1	12014	0
chr2	89104023	89163617	59595	*	9.77	9.6	9.93	-0.33	4.13e-05	0.000411	777.12	775.09	1020	926.71	Promoter (<=1kb)	2	89124794	89125729	936	2	258177	uc008kqz.1	0	ENSMUSG00000075101	Olfr1222	olfactory receptor 1222	uc008kqz.1;uc008kra.1;uc008kqy.1	258177;258894;258904	0;0;0
chr11	115857708	115860372	2665	*	5.8	6.3	5.02	1.28	4.17e-05	0.000415	74.48	82.81	31	33.83	Distal Intergenic	11	115824058	115855780	31723	1	217325	uc011yhq.1	33650	ENSMUSG00000020782	Llgl2	LLGL2 scribble cell polarity complex component	uc007mit.1;uc011yhq.1	217325;217325	33650;33650
chr11	90385821	90395183	9363	*	7.41	7.72	7.01	0.71	4.18e-05	0.000416	217.66	205.19	122	136.2	Promoter (<=1kb)	11	90336535	90389648	53114	2	217082	uc007kwq.1	0	ENSMUSG00000003949	Hlf	hepatic leukemia factor	uc007kwq.1;uc007kwr.1;uc007kws.1;uc007kwt.2	217082;217082;217082;217082	0;0;0;0
chr11	121145422	121158558	13137	*	7.7	7.98	7.35	0.64	4.18e-05	0.000416	249.52	256.94	159	166.47	Promoter (<=1kb)	11	121146143	121148314	2172	1	73679	uc007mvi.2	0	ENSMUSG00000039329	Tex19.1	testis expressed gene 19.1	uc007mvj.1;uc007mvi.2	217369;73679	-1713;0
chr5	43836120	43859496	23377	*	8.45	8.68	8.17	0.51	4.22e-05	0.00042	429.53	390.28	290	287.54	3' UTR	5	43818893	43843468	24576	1	12182	uc008xia.1	17227	ENSMUSG00000029082	Bst1	bone marrow stromal cell antigen 1	uc008xia.1;uc008xib.1	12182;12182	0;0
chr11	77511660	77517312	5653	*	6.64	7.03	6.1	0.93	4.24e-05	0.000421	132.83	128.47	71	65.88	Promoter (<=1kb)	11	77508099	77513273	5175	2	216964	uc007kgz.1	0	ENSMUSG00000044328	Trp53i13	transformation related protein 53 inducible protein 13	uc007kgy.1;uc007kgz.1;uc007kha.1	216963;216964;67477	18248;0;0
chr5	79399664	79452031	52368	*	9.97	9.8	10.11	-0.31	4.27e-05	0.000423	894.22	893.21	1164	1051.34	Distal Intergenic	5	81020571	81388784	368214	1	319387	uc008xwi.1	-1568540	ENSMUSG00000037605	Adgrl3	adhesion G protein-coupled receptor L3	NA	NA	NA
chr5	92593594	92608440	14847	*	7.82	8.09	7.48	0.61	4.29e-05	0.000425	276.01	270.34	172	185.16	Promoter (<=1kb)	5	92603051	92604821	1771	1	52331	uc008ydo.1	0	ENSMUSG00000047963	Stbd1	starch binding domain 1	uc008ydr.1;uc012dyu.1;uc008ydn.2;uc012dys.1;uc012dyt.1;uc008ydo.1;uc008ydp.1;uc008ydq.1	320696;320696;384198;384198;384198;52331;52331;52331	0;0;22057;22057;22057;0;0;0
chr2	150499164	150503043	3880	*	6.27	6.72	5.62	1.1	4.39e-05	0.000435	103.86	107.16	59	39.17	Distal Intergenic	2	150470991	150485063	14073	2	545471	uc008mub.1	-14101	ENSMUSG00000074731	Zfp345	zinc finger protein 345	NA	NA	NA
chr10	38330532	38340512	9981	*	7.49	7.12	7.79	-0.67	4.4e-05	0.000435	138.21	140.04	225	216.32	Distal Intergenic	10	38175774	38181903	6130	1	75877	uc007evj.2	154758	ENSMUSG00000111234	4930591E09Rik	RIKEN cDNA 4930591E09 gene	NA	NA	NA
chr3	9332978	9352721	19744	*	8.25	8.5	7.94	0.56	4.42e-05	0.000437	375.32	347.66	225	266.17	Distal Intergenic	3	9403078	9413903	10826	1	320088	uc012cne.1	-50357	ENSMUSG00000097365	C030034L19Rik	RIKEN cDNA C030034L19 gene	NA	NA	NA
chr7	89981742	89988477	6736	*	6.99	7.35	6.49	0.86	4.46e-05	0.00044	171.31	155.87	105	74.78	Promoter (<=1kb)	7	89954654	89980976	26323	2	13626	uc009igk.2	-766	ENSMUSG00000030619	Eed	embryonic ectoderm development	uc009igk.2	13626	-766
chr8	52970463	53113521	143059	*	11.52	11.41	11.62	-0.2	4.46e-05	0.00044	2738.95	2721.63	3300	2985.76	Distal Intergenic	8	53511702	53523422	11721	1	11593	uc009lrz.2	-398181	ENSMUSG00000031521	Aga	aspartylglucosaminidase	NA	NA	NA
chr12	62284270	62307785	23516	*	8.44	8.16	8.68	-0.51	4.46e-05	0.00044	295.45	278.25	438	381.01	Distal Intergenic	12	62687787	62688336	550	1	73309	uc057bbm.1	-380002	NA	Spanxn4	SPANX family, member N4	NA	NA	NA
chr4	152310301	152316991	6691	*	6.92	7.29	6.42	0.86	4.46e-05	0.00044	165.93	146.13	95	76.56	Promoter (1-2kb)	4	152307023	152318625	11603	2	433809	uc008waf.2	1634	ENSMUSG00000058498	Rnf207	ring finger protein 207	uc008waf.2;uc012dqb.1;uc008wag.2;uc008wad.2;uc029vba.1	433809;433809;433809;57295;57295	0;0;0;13087;13087
chr14	116234067	116286805	52739	*	9.78	9.61	9.92	-0.31	4.48e-05	0.000441	774.22	793.35	977	966.77	Intron (uc007uyi.2/103978, intron 7 of 7)	14	115092215	116525192	1432978	1	103978	uc007uyi.2	1141852	ENSMUSG00000022112	Gpc5	glypican 5	uc007uyi.2	103978	0
chr14	63937344	63959439	22096	*	8.36	8.6	8.08	0.52	4.51e-05	0.000444	372.42	402.46	266	274.18	Promoter (<=1kb)	14	63943706	63950732	7027	1	20680	uc007uhy.1	0	ENSMUSG00000063060	Sox7	SRY (sex determining region Y)-box 7	uc007uhy.1	20680	0
chr18	59172010	59181296	9287	*	7.36	7.68	6.95	0.73	4.52e-05	0.000445	211.45	199.1	113	134.42	Promoter (<=1kb)	18	59175340	59182021	6682	1	78923	uc008ezv.1	0	ENSMUSG00000058152	Chsy3	chondroitin sulfate synthase 3	uc008ezv.1;uc008ezw.1	78923;78923	0;0
chr13	112647264	112656551	9288	*	7.69	7.98	7.33	0.65	4.53e-05	0.000446	242.07	263.64	173	148.66	Promoter (<=1kb)	13	112598333	112652310	53978	2	13206	uc007rwm.2	0	ENSMUSG00000021758	Ddx4	DEAD (Asp-Glu-Ala-Asp) box polypeptide 4	uc007rwm.2;uc007rwn.2;uc007rwo.2	13206;13206;268706	0;0;-4215
chr12	84560215	84574934	14720	*	7.88	8.15	7.55	0.6	4.56e-05	0.000448	276.83	291.04	184	190.5	Promoter (<=1kb)	12	84569828	84595457	25630	1	12677	uc007ofm.2	0	ENSMUSG00000021239	Vsx2	visual system homeobox 2	uc007ofm.2;uc007ofn.2	12677;12677	0;0
chr2	167141681	167151453	9773	*	7.26	7.58	6.84	0.75	4.61e-05	0.000452	203.18	180.83	119	109.5	Intron (uc008nzh.2/16500, intron 1 of 1)	2	167095969	167188818	92850	2	16500	uc008nzh.2	37365	ENSMUSG00000050556	Kcnb1	potassium voltage gated channel, Shab-related subfamily, member 1	uc008nzh.2;uc008nzi.2	16500;16500	0;0
chr5	101762297	101768721	6425	*	6.93	7.29	6.44	0.85	4.63e-05	0.000454	165.93	147.35	95	78.34	Promoter (<=1kb)	5	101765130	101823852	58723	1	74596	uc008yio.1	0	ENSMUSG00000029330	Cds1	CDP-diacylglycerol synthase 1	uc008yio.1	74596	0
chr3	102724618	102738775	14158	*	7.76	8.04	7.42	0.62	4.66e-05	0.000457	266.07	259.99	173	170.03	Promoter (<=1kb)	3	102734770	102772310	37541	1	70747	uc008qrw.2	0	ENSMUSG00000027858	Tspan2	tetraspanin 2	uc008qrw.2;uc029unw.1;uc029unv.1	70747;70747;78491	0;0;0
chr2	130573574	130582512	8939	*	7.54	7.84	7.17	0.67	4.67e-05	0.000457	239.18	219.8	138	149.56	Promoter (<=1kb)	2	130576169	130577054	886	1	18429	uc008mjg.3	0	ENSMUSG00000027301	Oxt	oxytocin	uc008mjh.2;uc008mjg.3	11998;18429	0;0
chr15	38997426	39011961	14536	*	7.9	8.18	7.56	0.62	4.71e-05	0.000461	285.52	294.69	210	168.25	Promoter (<=1kb)	15	39006280	39038192	31913	1	14368	uc007vnz.3	0	ENSMUSG00000022297	Fzd6	frizzled class receptor 6	uc007vnz.3;uc007vny.3	14368;14368	0;0
chr17	67350955	67359462	8508	*	7.03	7.38	6.57	0.81	4.73e-05	0.000462	170.9	163.18	89	101.48	Promoter (<=1kb)	17	66666848	67354459	687612	2	19274	uc008dka.2	0	ENSMUSG00000033278	Ptprm	protein tyrosine phosphatase, receptor type, M	uc008dka.2;uc008dkb.2;uc012awj.1	19274;19274;19274	0;0;0
chr3	14990824	15011672	20849	*	8.44	8.67	8.17	0.5	4.74e-05	0.000463	400.97	411.59	293	283.09	Exon (uc008oqu.1/77127, exon 5 of 5)	3	14971201	15002727	31527	1	77127	uc008oqu.1	19623	ENSMUSG00000098008	A930001A20Rik	RIKEN cDNA A930001A20 gene	uc008oqu.1;uc029ujw.1	77127;77127	0;0
chr8	30042440	30093759	51320	*	10.04	9.9	10.18	-0.28	4.74e-05	0.000463	941.81	963.23	1153	1165.28	Distal Intergenic	8	30568395	30575573	7179	1	71314	uc029wsd.1	-474636	ENSMUSG00000097044	4933433F19Rik	RIKEN cDNA 4933433F19 gene	NA	NA	NA
chr14	48746933	48761620	14688	*	7.88	8.15	7.56	0.59	4.75e-05	0.000463	283.87	284.34	186	190.5	Intron (uc007tjt.1/606497, intron 4 of 4)	14	48669288	48793348	124061	1	606497	uc007tjt.1	77645	ENSMUSG00000098682	Otx2os1	orthodenticle homeobox 2 opposite strand 1	uc007tjt.1	606497	0
chr2	42140797	42190947	50151	*	9.47	9.28	9.63	-0.36	4.79e-05	0.000467	613.25	626.52	834	754.01	Intron (uc008jon.1/94217, intron 2 of 90)	2	40596773	42653598	2056826	2	94217	uc008jon.1	462651	ENSMUSG00000049252	Lrp1b	low density lipoprotein-related protein 1B (deleted in tumors)	uc008jon.1;uc008joo.1	94217;94217	0;0
chr9	120299198	120312514	13317	*	7.87	8.14	7.54	0.6	4.9e-05	0.000477	291.32	272.16	189	183.38	Promoter (<=1kb)	9	120304073	120474834	170762	1	245049	uc009scn.1	0	ENSMUSG00000041794	Myrip	myosin VIIA and Rab interacting protein	uc009scn.1	245049	0
chr3	142164724	142172023	7300	*	7.2	7.53	6.77	0.76	4.91e-05	0.000478	179.18	189.97	108	110.39	Promoter (<=1kb)	3	141837136	142169228	332093	2	12167	uc008roj.2	0	ENSMUSG00000052430	Bmpr1b	bone morphogenetic protein receptor, type 1B	uc008roj.2;uc008rok.2	12167;12167	0;0
chr12	15312841	15341200	28360	*	8.68	8.42	8.9	-0.48	4.94e-05	0.000481	328.97	354.36	521	435.31	Distal Intergenic	12	14996389	15050389	54001	2	73972	uc007nbp.1	-262452	ENSMUSG00000113644	4930448C13Rik	RIKEN cDNA 4930448C13 gene	NA	NA	NA
chr18	15144697	15164011	19315	*	8.24	8.48	7.96	0.53	4.95e-05	0.000481	356.28	359.84	252	244.81	Promoter (<=1kb)	18	14968685	15151446	182762	2	106931	uc008edo.1	0	ENSMUSG00000036225	Kctd1	potassium channel tetramerisation domain containing 1	uc008edo.1	106931	0
chr12	14144970	14157770	12801	*	7.87	8.14	7.54	0.6	4.96e-05	0.000481	290.07	273.99	193	179.82	Promoter (<=1kb)	12	14147598	14152038	4441	2	105005	uc007nbn.1	0	ENSMUSG00000020607	Fam84a	family with sequence similarity 84, member A	uc007nbn.1	105005	0
chr1	178222118	178232320	10203	*	7.55	7.85	7.19	0.66	4.97e-05	0.000482	233.8	226.5	147	144.21	Intron (uc007dux.2/78825, intron 1 of 4)	1	178187417	178252598	65182	1	78825	uc007dux.2	34701	ENSMUSG00000026502	Desi2	desumoylating isopeptidase 2	uc007dux.2;uc011wxk.2	78825;78825	0;0
chr19	43372180	43394505	22326	*	8.73	8.94	8.49	0.46	4.98e-05	0.000482	508.56	476.74	341	376.56	Promoter (<=1kb)	19	42788595	43388355	599761	2	545291	uc008hoe.2	0	ENSMUSG00000074852	Hpse2	heparanase 2	uc008hoe.2	545291	0
chr13	104330617	104418072	87456	*	10.49	10.36	10.61	-0.25	5.01e-05	0.000486	1275.33	1346.2	1551	1565.88	Exon (uc007rti.2/108154, exon 8 of 25)	13	104287835	104496695	208861	1	108154	uc007rti.2	42782	ENSMUSG00000046169	Adamts6	a disintegrin-like and metallopeptidase (reprolysin type) with thrombospondin type 1 motif, 6	uc007rti.2;uc011zeh.2	108154;108154	0;0
chr1	47888989	47932291	43303	*	9.37	9.18	9.54	-0.36	5.02e-05	0.000487	574.77	583.29	771	715.73	Distal Intergenic	1	47467021	47467125	105	2	102466969	uc033fiz.1	-421864	ENSMUSG00000098876	Mir6350	microRNA 6350	NA	NA	NA
chr10	90700736	90717940	17205	*	8.28	8.52	7.99	0.54	5.07e-05	0.000491	385.66	350.1	242	265.28	Intron (uc057kjj.1/77531, intron 17 of 25)	10	89873509	90972985	1099477	1	77531	uc057kjj.1	827227	ENSMUSG00000058589	Anks1b	ankyrin repeat and sterile alpha motif domain containing 1B	uc057kjj.1;uc033fsd.2;uc007gta.2;uc033fsa.2;uc033fsb.2;uc033fsc.2	77531;77531;77531;77531;77531;77531	0;0;0;0;0;0
chr18	10040618	10058923	18306	*	8.21	8.45	7.91	0.54	5.08e-05	0.000491	347.59	351.92	230	251.04	Distal Intergenic	18	10009353	10030149	20797	2	59025	uc008eap.1	-10469	ENSMUSG00000047879	Usp14	ubiquitin specific peptidase 14	NA	NA	NA
chr14	93786927	93929849	142923	*	11.27	11.16	11.36	-0.2	5.09e-05	0.000492	2287.9	2299.69	2699	2560.24	Promoter (<=1kb)	14	93013700	93888888	875189	2	211712	uc007uum.2	0	ENSMUSG00000055421	Pcdh9	protocadherin 9	uc007uum.2;uc011zpc.2;uc057kth.1;uc007uun.2;uc007uuo.2	211712;211712;211712;211712;211712	0;0;0;0;0
chr12	108302578	108308721	6144	*	6.74	7.12	6.22	0.9	5.11e-05	0.000493	134.07	144.3	72	77.45	Promoter (<=1kb)	12	108306270	108328300	22031	1	214305	uc007ozn.1	0	ENSMUSG00000021260	Hhipl1	hedgehog interacting protein-like 1	uc007ozn.1	214305	0
chr6	88858353	88876923	18571	*	8.04	8.29	7.73	0.56	5.11e-05	0.000493	308.7	319.05	217	207.42	Promoter (<=1kb)	6	88842558	88874044	31487	2	319655	uc009cvu.2	0	ENSMUSG00000033152	Podxl2	podocalyxin-like 2	uc009cvu.2;uc057lqu.1;uc009cvw.2	319655;319655;319655	0;0;0
chr18	74955354	74965208	9855	*	7.42	7.73	7.04	0.69	5.16e-05	0.000497	208.97	215.54	130	132.64	Promoter (<=1kb)	18	74939322	74961263	21942	2	16891	uc008fpu.2	0	ENSMUSG00000053846	Lipg	lipase, endothelial	uc008fpu.2;uc008fpv.2	16891;16891	0;0
chr11	93093088	93108444	15357	*	8.09	8.34	7.78	0.57	5.18e-05	0.000499	329.8	319.05	236	202.08	Promoter (<=1kb)	11	93098410	93491923	393514	1	72605	uc007kxg.1	0	ENSMUSG00000056158	Car10	carbonic anhydrase 10	uc007kxg.1;uc007kxh.2;uc007kxi.2;uc007kxj.2	72605;72605;72605;72605	0;0;0;0
chr12	87296544	87302624	6081	*	6.92	7.28	6.45	0.83	5.26e-05	0.000506	162.21	148.56	89	85.46	Promoter (<=1kb)	12	87278638	87299705	21068	2	217738	uc056yrt.1	0	ENSMUSG00000050671	Ism2	isthmin 2	uc007oiu.2;uc007oiv.2;uc007oiw.2;uc056yrt.1	20773;20773;20773;217738	25989;41224;85731;0
chr10	115580049	115598816	18768	*	8.3	8.54	8.02	0.52	5.26e-05	0.000506	369.11	374.45	271	247.48	Promoter (<=1kb)	10	115450314	115587780	137467	2	14160	uc007hbi.1	0	ENSMUSG00000020140	Lgr5	leucine rich repeat containing G protein coupled receptor 5	uc007hbi.1;uc007hbj.1;uc007hbk.1;uc007hbl.2	14160;14160;14160;77798	0;0;0;0
chr11	103741153	103756078	14926	*	8	8.26	7.68	0.58	5.3e-05	0.000509	305.38	306.87	191	218.1	Promoter (<=1kb)	11	103727363	103749821	22459	2	22412	uc007lvr.1	0	ENSMUSG00000018486	Wnt9b	wingless-type MMTV integration site family, member 9B	uc007lvr.1	22412	0
chr8	7466392	7500374	33983	*	8.87	8.65	9.07	-0.42	5.38e-05	0.000517	397.25	404.9	558	516.32	Distal Intergenic	8	8617439	8660773	43335	2	13642	uc009kue.1	1160399	ENSMUSG00000001300	Efnb2	ephrin B2	NA	NA	NA
chr2	163194335	163207842	13508	*	7.82	8.09	7.48	0.61	5.47e-05	0.000525	259.45	286.17	182	174.48	Distal Intergenic	2	163225454	163323102	97649	1	269389	uc008nso.1	-17612	ENSMUSG00000074607	Tox2	TOX high mobility group box family member 2	NA	NA	NA
chr8	70584197	70625752	41556	*	9.33	9.51	9.14	0.37	5.5e-05	0.000527	702.22	751.34	561	564.39	Promoter (<=1kb)	8	70616844	70620850	4007	1	211228	uc009maz.1	0	ENSMUSG00000049988	Lrrc25	leucine rich repeat containing 25	uc009mau.1;uc009maz.1;uc009mba.2;uc009mav.1;uc009maw.1;uc009max.2;uc009may.1	13716;211228;23886;71780;71780;76900;76900	0;0;5883;0;0;0;0
chr10	104771622	104788532	16911	*	8.08	7.78	8.32	-0.54	5.56e-05	0.000533	217.66	222.24	311	330.27	Distal Intergenic	10	104287269	104287376	108	1	102465222	uc033fso.1	484353	ENSMUSG00000099264	Mir6411	microRNA 6411	NA	NA	NA
chr13	96125513	96141403	15891	*	8.11	8.36	7.81	0.55	5.61e-05	0.000537	329.8	326.96	229	220.77	Promoter (<=1kb)	13	95959443	96132577	173135	2	75209	uc007rmt.2	0	ENSMUSG00000051111	Sv2c	synaptic vesicle glycoprotein 2c	uc007rmt.2	75209	0
chr14	57993021	58002404	9384	*	7.32	7.63	6.92	0.71	5.61e-05	0.000537	199.87	197.27	123	119.29	Promoter (<=1kb)	14	57916280	57999262	82983	2	68514	uc007udv.1	0	ENSMUSG00000021973	Micu2	mitochondrial calcium uptake 2	uc007udv.1	68514	0
chr4	40468105	40475078	6974	*	6.9	7.28	6.41	0.87	5.66e-05	0.000541	173.38	136.39	85	84.57	Promoter (<=1kb)	4	40472180	40475653	3474	1	320500	uc008shm.1	0	ENSMUSG00000046593	Tmem215	transmembrane protein 215	uc008shm.1;uc012dbv.1	320500;320500	0;0
chr14	79836309	79865572	29264	*	8.87	9.08	8.64	0.44	5.73e-05	0.000548	571.46	507.19	409	387.24	3' UTR	14	79860521	79869176	8656	2	100038734	uc007utl.1	3604	ENSMUSG00000095959	Gm10845	predicted gene 10845	uc007utl.1	100038734	0
chr15	55302019	55329658	27640	*	8.91	9.1	8.68	0.42	5.8e-05	0.000553	564.42	533.98	409	413.95	Promoter (<=1kb)	15	55307750	55520803	213054	1	12818	uc007vsc.2	0	ENSMUSG00000022371	Col14a1	collagen, type XIV, alpha 1	uc007vsc.2;uc007vsd.2	12818;12818	0;0
chr10	103136407	103204174	67768	*	10.03	9.88	10.16	-0.29	5.8e-05	0.000553	960.02	923.65	1150	1145.7	Exon (uc011xmu.1/74978, exon 9 of 26)	10	103063198	103236322	173125	2	74978	uc011xmu.1	32148	ENSMUSG00000019892	Lrriq1	leucine-rich repeats and IQ motif containing 1	uc011xmu.1	74978	0
chr7	100003560	100013944	10385	*	7.28	7.6	6.87	0.72	5.86e-05	0.000559	195.73	191.18	114	120.18	Promoter (<=1kb)	7	100006404	100034726	28323	1	69121	uc009imi.2	0	ENSMUSG00000030732	Chrdl2	chordin-like 2	uc009imi.2;uc057ain.1	69121;69121	0;0
chr4	27949261	27992142	42882	*	9.35	9.15	9.51	-0.36	5.86e-05	0.000559	561.53	577.81	760	703.27	Distal Intergenic	4	28813131	28873801	60671	1	13841	uc008sel.3	-820989	ENSMUSG00000028289	Epha7	Eph receptor A7	NA	NA	NA
chr4	50762754	50797313	34560	*	8.93	8.71	9.13	-0.42	5.88e-05	0.00056	415.87	421.34	588	529.67	Distal Intergenic	4	51216678	51229928	13251	1	74914	uc012dee.1	-419365	ENSMUSG00000039555	Cylc2	cylicin, basic protein of sperm head cytoskeleton 2	NA	NA	NA
chr7	8355892	8436772	80881	*	10.04	9.89	10.18	-0.28	5.89e-05	0.000561	937.67	966.27	1142	1171.52	Promoter (<=1kb)	7	8367460	8383238	15779	2	434113	uc012eyh.1	0	ENSMUSG00000094098	Vmn2r44	vomeronasal 2, receptor 44	uc012eyh.1	434113	0
chr14	77215424	77256323	40900	*	9.26	9.44	9.06	0.37	5.9e-05	0.000561	674.08	712.98	536	535.02	Exon (uc029sma.1/uc029sma.1, exon 1 of 1)	14	77156763	77594319	437557	1	239188	uc007urv.2	58661	ENSMUSG00000022012	Enox1	ecto-NOX disulfide-thiol exchanger 1	uc007urv.2;uc007urw.2;uc007urx.2;uc007ury.2;uc007urz.2	239188;239188;239188;239188;239188	0;0;0;0;0
chr17	36143989	36148395	4407	*	5.95	6.43	5.23	1.2	5.92e-05	0.000562	78.21	94.37	36	39.17	Promoter (<=1kb)	17	36145018	36162374	17357	1	675325	uc012asm.1	0	ENSMUSG00000038311	2410017I17Rik	RIKEN cDNA 2410017I17 gene	uc012asm.1	675325	0
chr3	118525442	118550666	25225	*	8.5	8.24	8.71	-0.47	5.94e-05	0.000564	307.45	297.13	428	412.17	Distal Intergenic	3	118562178	118783279	221102	1	99586	uc008rdf.1	-11512	ENSMUSG00000033308	Dpyd	dihydropyrimidine dehydrogenase	NA	NA	NA
chr8	105008527	105248353	239827	*	12.17	12.24	12.1	0.14	5.96e-05	0.000565	4819.12	4847.79	4329	4430.57	Promoter (<=1kb)	8	105170674	105217989	47316	1	12400	uc009nbp.3	0	ENSMUSG00000031885	Cbfb	core binding factor beta	uc009nbp.3;uc009nbq.3;uc009nbr.3;uc012gjd.2;uc009nbn.2;uc012gjc.1;uc009nbo.1;uc009nbt.3;uc009nbu.3;uc009nbv.3;uc009nbw.1;uc009nbl.2;uc009nbm.2;uc033jhg.1;uc009nbx.2;uc029wvg.2	12400;12400;12400;12400;13909;13909;234677;234678;234678;234678;234678;382053;382053;436059;97440;97440	0;0;0;0;0;0;0;0;0;0;-390;0;0;0;0;0
chr11	7191558	7218380	26823	*	8.57	8.78	8.31	0.47	5.97e-05	0.000565	444.01	437.17	305	330.27	Promoter (<=1kb)	11	7197787	7202546	4760	1	16006	uc007hzh.2	0	ENSMUSG00000020429	Igfbp1	insulin-like growth factor binding protein 1	uc029rko.1;uc007hzh.2;uc007hzi.3	100041347;16006;16009	-2989;0;0
chr8	58171029	58291856	120828	*	11.38	11.28	11.48	-0.21	5.97e-05	0.000565	2509.7	2448.86	2990	2726.71	Intron (uc012gea.2/270049, intron 4 of 11)	8	57774052	58911627	1137576	2	270049	uc012gea.2	619771	ENSMUSG00000096914	Galntl6	UDP-N-acetyl-alpha-D-galactosamine:polypeptide N-acetylgalactosaminyltransferase-like 6	uc012gea.2	270049	0
chr9	72904178	72947121	42944	*	9.32	9.49	9.12	0.37	5.97e-05	0.000565	728.29	709.94	527	583.98	Promoter (<=1kb)	9	72925650	72946015	20366	1	72135	uc009qqi.1	0	ENSMUSG00000034910	Pygo1	pygopus 1	uc009qqh.1;uc009qqi.1	235472;72135	0;0
chr1	49486414	49498286	11873	*	7.65	7.3	7.94	-0.63	5.98e-05	0.000565	165.52	150.39	254	235.91	Distal Intergenic	1	49244616	49340431	95816	1	442837	uc007axf.1	241798	ENSMUSG00000051616	C230029F24Rik	RIKEN cDNA C230029F24 gene	NA	NA	NA
chr15	84854272	84859794	5523	*	6.16	6.61	5.5	1.11	5.98e-05	0.000565	89.38	105.94	47	43.62	Promoter (<=1kb)	15	84785376	84855099	69724	2	271305	uc007xcm.2	0	ENSMUSG00000016624	Phf21b	PHD finger protein 21B	uc007xcm.2;uc007xco.2;uc011zxh.1	271305;271305;271305	0;0;0
chr3	76326116	76360712	34597	*	9.07	8.86	9.26	-0.4	5.98e-05	0.000565	482.91	444.47	618	604.45	Intron (uc008pnj.2/213262, intron 4 of 15)	3	76074561	76710005	635445	1	213262	uc008pnj.2	251555	ENSMUSG00000034098	Fstl5	follistatin-like 5	uc008pnj.2;uc029umr.1	213262;213262	0;0
chr7	87320063	87372272	52210	*	9.59	9.42	9.75	-0.33	6.01e-05	0.000567	662.91	703.24	841	875.97	Exon (uc009ifl.3/50490, exon 9 of 18)	7	87246649	87398710	152062	1	50490	uc009ifl.3	73414	ENSMUSG00000030562	Nox4	NADPH oxidase 4	uc009ifl.3;uc009ifm.3;uc009ifn.3;uc012fot.3	50490;50490;50490;50490	0;0;0;0
chr6	38661958	38670597	8640	*	7.16	7.51	6.69	0.82	6.02e-05	0.000568	185.8	178.4	85	121.96	Promoter (<=1kb)	6	38663069	38680865	17797	1	665180	uc029vuf.1	0	ENSMUSG00000079598	Clec2l	C-type lectin domain family 2, member L	uc029vuf.1	665180	0
chr7	142744331	142774358	30028	*	8.92	9.11	8.69	0.41	6.04e-05	0.000569	555.32	547.98	427	401.48	Distal Intergenic	7	142678656	142679726	1071	2	16334	uc009koh.3	-64605	ENSMUSG00000000215	Ins2	insulin II	NA	NA	NA
chr9	4245994	4265008	19015	*	8.16	8.4	7.86	0.54	6.04e-05	0.000569	348.42	327.57	228	236.8	Distal Intergenic	9	4294793	4309494	14702	2	67618	uc009obe.2	44486	ENSMUSG00000025894	Aasdhppt	aminoadipate-semialdehyde dehydrogenase-phosphopantetheinyl transferase	NA	NA	NA
[truncated: 11,733 more rows]

## Sheet: D0_h33k27me3
seqnames	start	end	width	strand	Conc	Conc_d0	Conc_d6	Fold	p.value	FDR	S01	S02	S09	S10	annotation	geneChr	geneStart	geneEnd	geneLength	geneStrand	geneId	transcriptId	distanceToTSS	ENSEMBL	SYMBOL	GENENAME	flank_txIds	flank_geneIds	flank_gene_distances
[truncated: 5,949 more rows]

[truncated: 1 more sheets: D6_h33k27me3]
