# Supplementary material for: Multi-omic profiling of histone variant H3.3 lysine 27 methylation reveals a distinct role from canonical H3 in stem cell differentiation
Source: Royal Society of Chemistry journal article supplement (doi:10.1039/d1mo00352f), 2022-01-12
Supplement: d1mo00352f6.xlsx [file d1mo00352f6.xlsx]

## Sheet: report_full_d0_k27me3_annotated
seqnames	start	end	width	strand	Conc	Conc_H33_K27me3	Conc_H31_K27me3	Fold	p.value	FDR	S01	S02	S05	S06	annotation	geneChr	geneStart	geneEnd	geneLength	geneStrand	geneId	transcriptId	distanceToTSS	ENSEMBL	SYMBOL	GENENAME	flank_txIds	flank_geneIds	flank_gene_distances
chr9	123923174	123947428	24255	*	11.47	11.86	10.94	0.92	1.1e-57	1.2e-53	3859.42	3576.56	1998	1930.53	Distal Intergenic	9	123962126	123968692	6567	2	12768	uc009sgy.2	21264	ENSMUSG00000025804	Ccr1	chemokine (C-C motif) receptor 1	NA	NA	NA
chr8	84677777	84860282	182506	*	13.07	12.79	13.3	-0.51	3.79e-54	2.06e-50	7169.5	6974.59	9866	10286.1	Promoter (<=1kb)	8	84832282	84835482	3201	1	102060	uc009mnj.1	0	ENSMUSG00000033751	Gadd45gip1	growth arrest and DNA-damage-inducible, gamma interacting protein 1	uc009mnj.1;uc009mnp.1;uc009mnb.1;uc009mnc.2;uc009mnd.2;uc009mne.2;uc009mnf.2;uc009mnk.2;uc009mnl.2;uc009mnm.2;uc009mnn.2;uc009mno.2;uc009mmw.5;uc009mmv.2;uc009mmx.2;uc009mmy.2;uc009mmz.1;uc009mna.1;uc009mnh.1;uc009mni.2;uc009mnr.2;uc009mns.2;uc009mnt.2;uc	102060;12317;17095;18032;18032;18032;18032;19358;19358;19358;19358;19358;212528;212528;212528;212528;212528;212528;23863;23863;66590;66590;66590;66590;66830;66830	0;0;0;0;0;0;0;0;0;0;0;0;0;0;0;0;0;0;0;0;0;0;0;0;-1271;0
chr2	18656380	18710543	54164	*	11.79	11.34	12.14	-0.8	8.09e-52	2.94e-48	2623.39	2552.45	4316	4691.07	Promoter (<=1kb)	2	18677018	18686629	9612	1	12151	uc008ily.1	0	ENSMUSG00000026739	Bmi1	Bmi1 polycomb ring finger oncogene	uc008ily.1;uc008ilz.1;uc008ilx.1;uc008ima.1	12151;12151;12238;381350	0;0;0;0
chr4	139802822	139861736	58915	*	11.52	11.05	11.87	-0.82	4.02e-50	1.09e-46	2124.72	2117.88	3612	3880.52	Promoter (<=1kb)	4	139738081	139832968	94888	2	18509	uc008vms.1	0	ENSMUSG00000028736	Pax7	paired box 7	uc008vms.1	18509	0
chr9	91338577	91449940	111364	*	12.29	11.94	12.57	-0.63	4.53e-45	9.87e-42	4006.09	3853.19	5881	6314.11	Promoter (<=1kb)	9	91360345	91365774	5430	2	22771	uc009raf.1	0	ENSMUSG00000032368	Zic1	zinc finger protein of the cerebellum 1	uc009raf.1;uc009rag.1;uc009rah.1;uc009rai.1;uc009rak.1;uc009ral.1	22771;22771;22774;22774;22774;22774	0;0;0;0;0;0
chr3	129129502	129244991	115490	*	12.22	11.84	12.51	-0.67	5.74e-45	1.04e-41	3734.75	3622.67	5591	6101.99	Promoter (<=1kb)	3	129199878	129219594	19717	1	18741	uc008rhu.2	0	ENSMUSG00000028023	Pitx2	paired-like homeodomain transcription factor 2	uc008rhu.2;uc008rhv.2;uc012cxo.2;uc008rhw.2;uc008rhx.2	18741;18741;18741;18741;18741	0;0;0;0;0
chr19	44713369	44771071	57703	*	11.56	11.09	11.92	-0.84	7.01e-45	1.09e-41	2233.38	2118.86	3684	4080.97	Promoter (<=1kb)	19	44757394	44837871	80478	1	18504	uc008hqa.3	0	ENSMUSG00000004231	Pax2	paired box 2	uc008hqa.3	18504	0
chr2	147171758	147205962	34205	*	10.88	10.35	11.27	-0.92	1.39e-43	1.89e-40	1304.03	1307.61	2367	2560.09	Promoter (<=1kb)	2	147184083	147331681	147599	1	100313531	uc012cfm.1	0	ENSMUSG00000086509	Nkx2-2os	NK2 homeobox 2, opposite strand	uc012cfm.1;uc008mst.1;uc008msu.1;uc033hqo.1	100313531;18088;18088;78068	0;0;0;0
chr10	42558903	42620870	61968	*	11.69	11.29	12.01	-0.71	1.61e-43	1.95e-40	2532.72	2484.76	3988	4232.76	Promoter (<=1kb)	10	42561971	42568819	6849	2	21907	uc007eys.1	0	ENSMUSG00000019803	Nr2e1	nuclear receptor subfamily 2, group E, member 1	uc007eys.1;uc007eyt.1	21907;21907	0;0
chr4	109971619	109999822	28204	*	10.64	10.09	11.04	-0.94	1.03e-42	1.12e-39	1100.69	1084.94	2044	2154.33	Promoter (<=1kb)	4	109978025	109983684	5660	1	242620	uc008ucv.1	0	ENSMUSG00000047143	Dmrta2	doublesex and mab-3 related transcription factor like family A2	uc008ucv.1	242620	0
chr2	71516807	71563179	46373	*	11.46	11.03	11.8	-0.77	1.18e-42	1.17e-39	2104.72	2064.91	3427	3688.83	Promoter (<=1kb)	2	71530638	71537891	7254	2	111970	uc008kaw.2	0	NA	Dlx1as	distal-less homeobox 1, antisense	uc008kaw.2;uc008kau.2;uc008kav.1;uc008kax.2;uc008kas.1	111970;13390;13390;13392;66559	0;0;0;0;0
chr1	42664431	42730492	66062	*	11.48	11.08	11.79	-0.71	1.19e-40	1.08e-37	2195.38	2134.56	3487	3613.9	Promoter (<=1kb)	1	42697146	42700210	3065	1	18993	uc007auw.2	0	ENSMUSG00000045515	Pou3f3	POU domain, class 3, transcription factor 3	uc007auw.2;uc007aur.1;uc007aus.1;uc007aut.1;uc007auu.1;uc007auv.1;uc033fix.2;uc007aux.2	18993;66297;66297;66297;66297;66297;66620;73100	0;0;0;0;0;0;0;0
chr13	78156975	78224525	67551	*	11.68	11.27	12	-0.73	4.48e-40	3.75e-37	2492.72	2462.2	3912	4289.2	Promoter (<=1kb)	13	78188973	78196354	7382	2	13865	uc057kqk.1	0	ENSMUSG00000069171	Nr2f1	nuclear receptor subfamily 2, group F, member 1	uc057kqk.1;uc007rhe.2;uc029sch.1;uc007rgy.2;uc007rgz.2;uc007rha.2;uc011zcc.1	13865;13865;320174;68675;68675;68675;68675	0;0;0;0;0;0;0
chr17	85604721	85628446	23726	*	10.02	9.36	10.48	-1.11	1.9e-39	1.48e-36	672.02	644.49	1354	1496.55	Promoter (<=1kb)	17	85601932	85615743	13812	2	100043902	uc057kyu.1	0	ENSMUSG00000093460	Six3os1	SIX homeobox 3, opposite strand 1	uc057kyu.1;uc029tky.1;uc008dtw.3;uc057kyv.1;uc008dtx.3;uc008dty.3;uc012ayg.2;uc029tkz.1;uc029tla.1;uc029tlb.2;uc057kyw.1;uc008dub.2;uc033hfi.1	100043902;100043902;100043902;100043902;100043902;100043902;100043902;100043902;100043902;100043902;100043902;20473;20473	0;0;0;0;0;0;0;0;0;0;0;0;0
chr4	22471006	22517378	46373	*	11.28	10.84	11.61	-0.77	5.15e-39	3.7e-36	1842.04	1816.73	3011	3243.17	Promoter (<=1kb)	4	22490548	22493126	2579	1	105500046	uc057brm.1	0	ENSMUSG00000107859	Gm30731	predicted gene, 30731	uc057brm.1;uc008sdp.2	105500046;18992	0;0
chr19	43567182	43624035	56854	*	11.57	11.13	11.9	-0.77	5.43e-39	3.7e-36	2274.05	2222.85	3620	4031.34	Promoter (<=1kb)	19	43612325	43615892	3568	1	18089	uc008hok.1	0	ENSMUSG00000044220	Nkx2-3	NK2 homeobox 3	uc008hok.1	18089	0
chr5	147290906	147327341	36436	*	10.87	10.39	11.22	-0.83	7.42e-39	4.76e-36	1362.7	1325.27	2358	2417.05	Promoter (<=1kb)	5	147300900	147307249	6350	2	12591	uc009anz.1	0	ENSMUSG00000029646	Cdx2	caudal type homeobox 2	uc009anz.1;uc009aob.3;uc009aoa.2	12591;14255;231903	0;0;0
chr13	36716053	36742208	26156	*	10.55	10.02	10.94	-0.92	2.61e-38	1.58e-35	1030.02	1043.74	1897	2024.91	Promoter (<=1kb)	13	36725622	36734477	8856	2	68404	uc007qcm.3	0	ENSMUSG00000039114	Nrn1	neuritin 1	uc007qcm.3	68404	0
chr2	105638248	105695454	57207	*	11.43	11.03	11.75	-0.72	7.13e-38	4.09e-35	2070.71	2108.07	3328	3566.22	Promoter (<=1kb)	2	105657862	105661343	3482	2	103164605	uc056zoc.1	0	ENSMUSG00000102424	Paupar	Pax6 upstream antisense RNA	uc056zoc.1;uc008lku.3;uc008lkv.3;uc012cat.3;uc008lky.3;uc057bnv.1;uc057bnw.1;uc008lla.3;uc008llb.3;uc057bnx.1;uc057bny.1;uc008llc.3;uc008lkt.1;uc012caq.1;uc012car.1;uc012cas.1;uc008lld.2	103164605;18508;18508;18508;18508;18508;18508;18508;18508;18508;18508;18508;402728;402728;402728;402728;77766	0;0;0;0;0;0;0;0;0;0;0;0;0;0;0;0;209110
chr5	120407487	120449511	42025	*	11.11	10.64	11.46	-0.83	1.26e-37	6.89e-35	1618.04	1563.64	2687	2950.28	Promoter (<=1kb)	5	120431886	120441457	9572	1	16873	uc012ecn.1	0	ENSMUSG00000029595	Lhx5	LIM homeobox protein 5	uc012ecn.1	16873	0
chr7	131529778	131559448	29671	*	10.9	10.36	11.29	-0.92	1.15e-36	5.99e-34	1328.7	1304.67	2323	2675.88	Promoter (<=1kb)	7	131548773	131556582	7810	1	15372	uc057lvl.1	0	ENSMUSG00000050100	Hmx2	H6 homeobox 2	uc009kbq.2;uc057cbe.1;uc057lvl.1;uc009kbp.1;uc009kbo.3	12237;12237;15372;15372;15373	-922;-1046;0;0;0
chr2	74640177	74781748	141572	*	13.33	12.83	13.71	-0.88	1.27e-36	6.31e-34	7280.17	7245.34	12704	14024.5	Promoter (<=1kb)	2	74752684	74753742	1059	1	102634401	uc008keh.2	0	ENSMUSG00000085015	Gm14424	predicted gene 14424	uc008keh.2;uc033hnp.1;uc008kdt.2;uc008kei.1;uc008kdx.3;uc033hno.1;uc008kdw.2;uc008kdv.2;uc008kdu.2;uc008kee.1;uc008keg.1;uc057ldm.1;uc008kef.2;uc056zni.2;uc008kea.3;uc008keb.3;uc008kdz.1;uc012bxl.1;uc008kec.1;uc008ked.2	102634401;102634678;14029;15429;15430;15431;15431;15432;15433;15434;15434;15434;15436;15437;15437;15437;15438;387144;73429;73429	0;0;0;0;0;0;0;0;0;0;0;0;0;0;0;0;0;0;0;0
chr14	122330492	122501705	171214	*	12.79	12.54	13.01	-0.46	1.46e-36	6.91e-34	5937.47	6002.47	7985	8480.12	Promoter (<=1kb)	14	122475384	122480328	4945	1	22772	uc007vbd.1	0	ENSMUSG00000061524	Zic2	zinc finger protein of the cerebellum 2	uc007vbd.1;uc007vaz.2;uc011zqj.1;uc007vba.2;uc007vbb.2;uc007vbc.1;uc007vax.2	22772;328479;328479;328479;65100;69248;69634	0;0;0;0;0;0;0
chr2	31623365	31659384	36020	*	10.96	10.5	11.32	-0.82	2.21e-36	1e-33	1476.03	1411.59	2458	2645.72	Promoter (<=1kb)	2	31640037	31655795	15759	1	381359	uc012bto.1	0	ENSMUSG00000079466	Prdm12	PR domain containing 12	uc012bto.1	381359	0
chr5	139515935	139573567	57633	*	11.43	11.01	11.75	-0.74	3.16e-36	1.38e-33	2086.71	2046.27	3287	3600.28	Promoter (<=1kb)	5	139543898	139545268	1371	1	22255	uc009agu.1	0	ENSMUSG00000029546	Uncx	UNC homeobox	uc009agu.1;uc009agv.2;uc029vpu.1	22255;22255;74973	0;0;0
chr4	114889314	114936519	47206	*	11.26	10.79	11.62	-0.83	3.66e-36	1.53e-33	1824.71	1724.52	2960	3327.83	Promoter (<=1kb)	4	114909289	114921118	11830	1	100040736	uc008ued.2	0	ENSMUSG00000085399	Foxd2os	forkhead box D2, opposite strand	uc008ued.2;uc008uee.2;uc012dix.1;uc008uef.1	100040736;100040736;17301;30923	0;0;0;0
chr19	45217945	45271185	53241	*	11.25	10.83	11.58	-0.75	5.96e-36	2.41e-33	1822.04	1807.9	2932	3172.14	Promoter (<=1kb)	19	45233728	45235236	1509	2	16814	uc008hqv.1	0	ENSMUSG00000025216	Lbx1	ladybird homeobox 1	uc008hqv.1	16814	0
chr17	27227649	27281623	53975	*	10.93	11.26	10.49	0.77	7.53e-35	2.93e-32	2490.06	2423.94	1459	1414.81	Promoter (<=1kb)	17	27235075	27242656	7582	2	319720	uc008bfn.1	0	NA	9630028I04Rik	RIKEN cDNA 9630028I04 gene	uc008bfn.1;uc008bfo.1	319720;319720	0;0
chr2	9853208	9902503	49296	*	11.29	10.87	11.61	-0.75	8.5e-35	3.2e-32	1932.71	1802.02	3034	3229.55	Promoter (<=1kb)	2	9857078	9878600	21523	2	14462	uc008ihe.1	0	ENSMUSG00000015619	Gata3	GATA binding protein 3	uc008ihj.1;uc008ihe.1;uc008ihf.1;uc008ihg.1;uc008ihh.2;uc008ihi.1	100126244;14462;14462;14462;381347;77682	-3646;0;0;0;0;0
chr13	55814419	55845358	30940	*	10.79	10.32	11.14	-0.82	1.04e-34	3.76e-32	1307.36	1254.64	2200	2313.91	Promoter (<=1kb)	13	55825054	55831425	6372	2	18740	uc007qsd.1	0	ENSMUSG00000021506	Pitx1	paired-like homeodomain transcription factor 1	uc007qsd.1	18740	0
chr15	98764170	98811585	47416	*	11.4	10.99	11.72	-0.73	8.87e-34	3.12e-31	2051.38	2020.77	3204	3551.63	Promoter (<=1kb)	15	98803782	98807925	4144	2	13199	uc007xny.1	0	ENSMUSG00000059213	Ddn	dendrin	uc007xnp.1;uc007xny.1;uc007xoa.1;uc007xnx.1;uc007xns.2;uc007xnt.2;uc007xnu.2;uc007xnv.2;uc007xnw.2	11842;13199;19082;22408;22410;22410;22410;22410;22410	-1052;0;19923;0;0;0;0;0;0
chr12	57517394	57587081	69688	*	11.56	11.18	11.86	-0.68	1.43e-33	4.8e-31	2382.05	2270.91	3581	3867.87	Promoter (<=1kb)	12	57540631	57546121	5491	2	15375	uc007nps.2	0	ENSMUSG00000035451	Foxa1	forkhead box A1	uc007nps.2;uc007npt.3;uc057bbj.1;uc056yqp.1	15375;70846;70846;78758	0;0;0;0
chr13	98332319	98406497	74179	*	11.59	11.23	11.88	-0.65	1.45e-33	4.8e-31	2466.06	2334.67	3676	3863.98	Promoter (<=1kb)	13	98354245	98356705	2461	1	15229	uc009van.1	0	ENSMUSG00000078302	Foxd1	forkhead box D1	uc009van.1	15229	0
chr13	94851509	94900893	49385	*	11.28	10.84	11.61	-0.77	2.03e-33	6.51e-31	1924.71	1736.29	3022	3234.41	Promoter (<=1kb)	13	94875627	94883681	8055	1	18420	uc007rly.1	0	ENSMUSG00000021685	Otp	orthopedia homeobox	uc007rly.1	18420	0
chr5	106431055	106481059	50005	*	11.26	10.85	11.58	-0.72	2.74e-33	8.55e-31	1868.71	1835.37	2933	3187.71	Promoter (<=1kb)	5	106452523	106458166	5644	2	104382	uc008ylm.1	0	ENSMUSG00000034384	Barhl2	BarH like homeobox 2	uc008ylm.1	104382	0
chr7	143299802	143503238	203437	*	12.89	12.66	13.09	-0.43	3.5e-33	1.06e-30	6465.48	6447.82	8442	8999.73	Promoter (<=1kb)	7	143458339	143461050	2712	2	12577	uc009kpd.2	0	ENSMUSG00000037664	Cdkn1c	cyclin-dependent kinase inhibitor 1C (P57)	uc009kpd.2;uc009kpe.2;uc009kpf.3;uc009kpb.1;uc012fxu.1;uc009kpg.2;uc009kph.2;uc009kpi.2;uc009kpj.1;uc012fxx.1;uc029wqb.1	12577;12577;12577;16535;16535;18400;18400;18400;22113;63830;71153	0;0;0;0;0;0;0;0;0;0;0
chr2	116046460	116089739	43280	*	11.01	10.59	11.33	-0.74	6.71e-33	1.98e-30	1582.04	1509.69	2540	2624.31	Promoter (<=1kb)	2	115861264	116064621	203358	2	17536	uc008lqt.2	0	ENSMUSG00000027210	Meis2	Meis homeobox 2	uc008lqt.2;uc008lqu.2;uc008lqv.2;uc008lqw.2;uc008lqx.2;uc008lqy.2;uc008lqz.2;uc008lra.2;uc008lrb.1;uc008lrc.1;uc012cbg.1	17536;17536;17536;17536;17536;17536;17536;17536;654793;654793;69974	0;0;0;0;0;0;0;0;0;0;0
chr9	63105619	63157088	51470	*	11.31	10.92	11.62	-0.7	7.36e-33	2.11e-30	1993.38	1890.3	3064	3238.31	Promoter (<=1kb)	9	63138164	63146980	8817	2	207667	uc009qat.2	0	ENSMUSG00000022245	Skor1	SKI family transcriptional corepressor 1	uc009qat.2;uc009qau.2;uc012guu.1;uc009qav.2	207667;207667;207667;207667	0;0;0;0
chr1	138817150	138853650	36501	*	10.84	10.38	11.19	-0.81	7.84e-33	2.19e-30	1346.7	1310.56	2228	2430.68	Promoter (<=1kb)	1	138825186	138842444	17259	2	16876	uc007cvr.1	0	ENSMUSG00000019230	Lhx9	LIM homeobox protein 9	uc007cvr.1;uc007cvs.1;uc007cvt.1;uc007cvu.2;uc007cvv.1;uc007cvw.1	16876;16876;16876;16876;69549;69549	0;0;0;0;0;0
chr18	37637390	37779299	141910	*	12.69	12.46	12.89	-0.43	8.03e-32	2.19e-29	5620.13	5626.76	7386	7756.17	Promoter (<=1kb)	18	37640491	37644204	3714	2	24074	uc008eqi.2	0	ENSMUSG00000051316	Taf7	TATA-box binding protein associated factor 7	uc008eoy.3;uc056zgg.2;uc056zgh.2;uc008eqi.2;uc008eqh.2;uc008eqo.2;uc008eqq.2;uc008equ.2;uc008eqw.2;uc008eqy.2;uc008era.2;uc029tmk.2;uc008eql.2;uc008eqm.2;uc008eqn.2;uc008eqp.2;uc008eqr.2;uc008eqs.2;uc008eqt.2;uc008eqv.2;uc008eqx.2;uc008eqz.2;uc008erb.2;uc	100384868;103611158;103611159;24074;83885;93699;93700;93701;93702;93703;93704;93705;93709;93710;93711;93712;93713;93714;93715;93716;93717;93722;93723;93724	0;0;0;0;0;0;0;0;0;0;0;0;0;0;0;0;0;0;0;0;0;0;0;0
chr1	74829330	74910830	81501	*	11.6	11.26	11.88	-0.63	1.44e-31	3.82e-29	2490.06	2398.44	3659	3897.06	Promoter (<=1kb)	1	74855029	74857732	2704	1	12570	uc007bng.2	0	ENSMUSG00000090071	Cdk5r2	cyclin-dependent kinase 5, regulatory subunit 2 (p39)	uc007bng.2;uc007bni.2;uc007bnj.1;uc007bnh.2;uc011wnd.1;uc011wne.1	12570;12958;241116;260298;260298;723900	0;0;0;0;0;0
chr2	73257058	73287511	30454	*	10.84	10.38	11.19	-0.81	4.4e-31	1.14e-28	1318.03	1339	2202	2460.84	Promoter (<=1kb)	2	73271926	73275771	3846	1	381373	uc008kcj.2	0	ENSMUSG00000068859	Sp9	trans-acting transcription factor 9	uc008kcj.2;uc008kck.2;uc012bxg.1	381373;66935;66935	0;0;0
chr12	56662699	56722157	59459	*	11.35	10.97	11.64	-0.68	5.06e-31	1.28e-28	2029.38	1977.61	3080	3320.04	Promoter (<=1kb)	12	56695471	56712822	17352	1	18511	uc007npi.2	0	ENSMUSG00000001497	Pax9	paired box 9	uc007npi.2;uc011ymc.1;uc007npj.2	18511;217593;217593	0;0;0
chr5	101638201	101679415	41215	*	10.89	10.48	11.21	-0.73	5.71e-31	1.41e-28	1434.03	1420.42	2322	2416.08	Promoter (<=1kb)	5	101659184	101664711	5528	2	18096	uc008yim.2	0	ENSMUSG00000035187	Nkx6-1	NK6 homeobox 1	uc008yim.2	18096	0
chr6	83673094	83728855	55762	*	11.13	10.73	11.45	-0.72	1.79e-30	4.33e-28	1662.7	1739.23	2686	2899.68	Promoter (<=1kb)	6	83711264	83738304	27041	1	24113	uc009cob.1	0	ENSMUSG00000034777	Vax2	ventral anterior homeobox 2	uc009cob.1;uc009cnw.2;uc009cnx.1;uc009cny.2;uc009cnz.1;uc009coa.1	24113;246278;574519;574519;574519;574519	0;0;0;0;0;0
chr16	94058609	94116318	57710	*	11.31	10.92	11.62	-0.71	2.56e-30	6.07e-28	1989.38	1883.43	3015	3298.63	Promoter (<=1kb)	16	94085260	94127032	41773	1	20465	uc008aae.1	0	ENSMUSG00000062713	Sim2	single-minded family bHLH transcription factor 2	uc008aae.1;uc012ais.1	20465;20465	0;0
chr11	98304382	98359361	54980	*	11.37	10.97	11.68	-0.71	2.71e-30	6.28e-28	2037.38	1963.87	3099	3463.08	Promoter (<=1kb)	11	98325417	98329645	4229	2	18013	uc009vai.1	0	ENSMUSG00000038255	Neurod2	neurogenic differentiation 2	uc009vai.1;uc007lfz.2;uc007lga.2;uc057azx.1;uc007lgb.2;uc007lgc.2;uc007lgd.2;uc007lge.2;uc029rnx.1	18013;19049;19049;19049;19049;59045;59045;59045;69338	0;0;0;0;0;0;0;0;0
chr13	12785708	12946200	160493	*	13.63	13.78	13.47	0.31	2.86e-30	6.5e-28	14051.7	14008	11227	11465.4	Promoter (<=1kb)	13	12790821	12800079	9259	2	18812	uc007plw.4	0	ENSMUSG00000056457	Prl2c3	prolactin family 2, subfamily c, member 3	uc007plw.4	18812	0
chr6	6807534	6899653	92120	*	12.05	11.73	12.31	-0.58	3.79e-30	8.43e-28	3468.75	3307.78	4844	5318.68	Promoter (<=1kb)	6	6877801	6882068	4268	2	13395	uc009awy.2	0	ENSMUSG00000029755	Dlx5	distal-less homeobox 5	uc009awy.2;uc009awz.2;uc009aww.1;uc009awx.2;uc009awt.1;uc009awu.1	13395;13395;13396;13397;320038;320038	0;0;0;0;0;0
chr11	84504236	84551566	47331	*	11.15	10.76	11.46	-0.7	1.73e-29	3.76e-27	1732.71	1731.39	2691	2924.98	Promoter (<=1kb)	11	84519379	84525534	6156	2	16869	uc007kqo.1	0	ENSMUSG00000018698	Lhx1	LIM homeobox protein 1	uc007kqo.1;uc007kqm.1;uc007kqn.1;uc007kqp.2	16869;56321;56321;78365	0;0;0;0
chr12	49358873	49412053	53181	*	11.31	10.91	11.63	-0.71	6.38e-29	1.36e-26	1941.38	1916.79	2969	3351.18	Promoter (<=1kb)	12	49382883	49386867	3985	1	15228	uc011ylr.1	0	ENSMUSG00000020950	Foxg1	forkhead box G1	uc011ylr.1;uc007nmf.2;uc007nmg.1;uc007nmi.2	15228;15228;67293;67293	0;0;0;0
chr3	127621116	127650546	29431	*	10.76	10.32	11.09	-0.77	8.62e-29	1.81e-26	1270.7	1283.09	2079	2280.83	Promoter (<=1kb)	3	127633145	127635631	2487	1	11924	uc008rhi.1	0	ENSMUSG00000027967	Neurog2	neurogenin 2	uc008rhi.1;uc008rhf.2;uc008rhh.2;uc008rhg.2	11924;71643;71643;71643	0;67627;67627;67614
chr8	12369857	12420571	50715	*	11.3	10.89	11.62	-0.73	9.56e-29	1.97e-26	1927.38	1868.72	2948	3368.69	Promoter (<=1kb)	8	12395519	12399555	4037	1	20664	uc009kwa.2	0	ENSMUSG00000096014	Sox1	SRY (sex determining region Y)-box 1	uc009kwa.2;uc012fzm.1	20664;434280	0;0
chr4	89265310	89315566	50257	*	11.27	10.9	11.57	-0.67	1.2e-28	2.43e-26	1914.04	1897.17	2901	3172.14	Promoter (<=1kb)	4	89295180	89518621	223442	1	102633081	uc029uww.2	0	NA	Gm12610	predicted gene 12610	uc029uww.2;uc008toh.1;uc008toi.1;uc008tok.2	102633081;12578;12578;12579	0;0;0;0
chr1	184704839	184743930	39092	*	10.88	10.45	11.21	-0.77	1.25e-28	2.48e-26	1427.37	1361.57	2254	2489.06	Promoter (<=1kb)	1	184727143	184732493	5351	2	15284	uc007dyn.3	0	ENSMUSG00000039377	Hlx	H2.0-like homeobox	uc007dyn.3;uc029qvc.1	15284;74971	0;0
chr16	17794948	17837341	42394	*	11.13	10.71	11.46	-0.75	1.3e-28	2.53e-26	1681.37	1661.74	2633	3004.77	Promoter (<=1kb)	16	17797282	17808290	11009	1	224024	uc007yme.1	0	ENSMUSG00000012017	Scarf2	scavenger receptor class F, member 2	uc007ymi.4;uc012abx.3;uc033gyb.2;uc033gyc.2;uc007ymj.3;uc007ymc.2;uc007yme.1;uc007ymd.2;uc007ymf.2;uc012abw.1;uc007ymg.1	13356;13356;13356;13356;13356;224023;224024;224024;224024;433004;80733	54387;54387;54387;54387;56127;0;0;0;0;0;0
chr6	52141646	52331801	190156	*	13.77	13.29	14.13	-0.85	1.53e-28	2.93e-26	10118.2	9845.85	17033	18905.4	Promoter (<=1kb)	6	52172881	52174055	1175	1	100504154	uc009byc.2	0	ENSMUSG00000087626	Gm15050	predicted gene 15050	uc009byc.2;uc029vvk.2;uc057adg.2;uc057adf.1;uc057bxe.1;uc057bxd.1;uc009byv.1;uc009bxx.2;uc009bxy.1;uc009bym.1;uc012ema.1;uc009byn.2;uc009byo.2;uc009byp.2;uc009byq.5;uc009byr.2;uc029vvl.1;uc009bxz.2;uc009bya.2;uc009byf.1;uc009byh.1;uc009byi.1;uc009byj.2;uc	100504154;100736249;105242657;105242658;105242658;106007488;14028;15394;15394;15395;15395;15396;15397;15397;15397;15397;15398;15399;15400;15401;15402;15403;15404;15404;15405;15405;70593;723820;72628;72628;791364;791364	0;0;0;0;0;0;0;0;0;0;0;0;0;0;0;0;0;0;0;0;0;0;0;0;0;0;0;0;0;0;0;0
chr6	84572893	84597907	25015	*	10.16	9.64	10.54	-0.9	1.64e-28	3.08e-26	810.02	790.65	1417	1564.66	Promoter (<=1kb)	6	84571414	84588638	17225	2	232174	uc009coy.2	0	ENSMUSG00000063415	Cyp26b1	cytochrome P450, family 26, subfamily b, polypeptide 1	uc009coy.2;uc009coz.2;uc057lqs.1	232174;232174;232174	0;0;0
chr14	70064205	70099420	35216	*	10.76	10.32	11.1	-0.78	1.94e-28	3.57e-26	1308.03	1243.85	2090	2299.31	Promoter (<=1kb)	14	70077445	70082613	5169	1	13655	uc007unb.2	0	ENSMUSG00000033730	Egr3	early growth response 3	uc007unb.2;uc007unc.2;uc033gru.1;uc007une.1;uc007una.2	13655;13655;13655;57784;73523	0;0;0;-725;0
chr4	115871555	115992320	120766	*	12.16	11.87	12.4	-0.53	2.61e-28	4.75e-26	3820.75	3659.94	5181	5617.41	Promoter (<=1kb)	4	115915119	115925638	10520	2	140477	uc008ufp.1	0	ENSMUSG00000028707	Dmbx1	diencephalon/mesencephalon homeobox 1	uc008ufp.1;uc008ufq.1;uc057ljv.1;uc012djg.1;uc008ufs.2;uc008ufl.2;uc008ufm.2;uc008ufn.2;uc008ufo.2;uc012djf.2;uc057lju.1	140477;140477;140477;14073;14073;17346;17346;17346;654462;654462;76237	0;0;0;0;0;0;0;0;0;0;0
chr2	105109592	105147113	37522	*	10.79	10.38	11.11	-0.73	9.4e-28	1.68e-25	1289.36	1371.38	2154	2260.39	Promoter (<=1kb)	2	105126529	105173614	47086	1	22431	uc008lko.2	0	ENSMUSG00000016458	Wt1	Wilms tumor 1 homolog	uc008lko.2;uc008lkp.1;uc008lkn.1	22431;22431;329480	0;0;0
chr4	21658955	21705157	46203	*	11.08	10.71	11.38	-0.67	9.92e-28	1.74e-25	1672.04	1678.41	2576	2746.92	Promoter (<=1kb)	4	21677480	21685963	8484	2	230025	uc008sco.1	0	ENSMUSG00000040478	Prdm13	PR domain containing 13	uc008sco.1;uc012dav.4;uc008scp.1	230025;230025;230025	0;0;0
chr19	45120935	45170122	49188	*	11.17	10.77	11.48	-0.71	1.14e-27	1.98e-25	1726.71	1765.72	2690	3003.8	Promoter (<=1kb)	19	45150715	45156943	6229	1	21908	uc008hqu.1	0	ENSMUSG00000025215	Tlx1	T cell leukemia, homeobox 1	uc008hqu.1	21908	0
chr4	115042773	115072467	29695	*	10.52	10.08	10.86	-0.78	1.61e-27	2.74e-25	1084.02	1079.05	1790	1926.64	Promoter (<=1kb)	4	115056426	115071755	15330	1	21349	uc008uem.2	0	ENSMUSG00000028717	Tal1	T cell acute lymphocytic leukemia 1	uc008ueh.3;uc008uei.3;uc012diz.3;uc012dja.2;uc012djb.3;uc008uej.3;uc008uem.2;uc008uek.1;uc008uel.1	20460;20460;20460;20460;20460;20460;21349;21349;21349	0;0;0;0;0;0;0;0;0
chr3	99228227	99274806	46580	*	11.09	10.7	11.39	-0.7	3.4e-27	5.7e-25	1654.7	1661.74	2555	2828.65	Promoter (<=1kb)	3	99253760	99354260	100501	1	21384	uc008qql.1	0	ENSMUSG00000027868	Tbx15	T-box 15	uc008qql.1	21384	0
chr1	74758639	74816649	58011	*	11.34	10.98	11.63	-0.65	6.9e-27	1.14e-24	2050.05	1976.63	3016	3317.12	Promoter (<=1kb)	1	74792019	74804176	12158	1	22409	uc007bnf.3	0	ENSMUSG00000026167	Wnt10a	wingless-type MMTV integration site family, member 10A	uc007bnf.3;uc007bne.1	22409;22420	0;0
chr19	25598023	25628336	30314	*	10.6	10.12	10.96	-0.84	8.56e-27	1.39e-24	1142.69	1081.99	1852	2124.17	Promoter (<=1kb)	19	25610537	25623921	13385	1	240590	uc008hbk.2	0	ENSMUSG00000042372	Dmrt3	doublesex and mab-3 related transcription factor 3	uc008hbk.2;uc012bju.1;uc012bjv.1	240590;50796;50796	0;0;0
chrX	93279509	93300794	21286	*	9.75	9.18	10.16	-0.98	1.02e-26	1.63e-24	612.68	549.34	1107	1180.31	Promoter (<=1kb)	20	93286507	93298357	11851	1	11878	uc009tsq.3	0	ENSMUSG00000035277	Arx	aristaless related homeobox	uc009tsq.3;uc009tsr.3;uc009tss.2;uc012hly.1	11878;11878;18968;18968	0;0;331361;331361
chr8	121029720	121101999	72280	*	11.75	11.45	12	-0.54	1.18e-26	1.87e-24	2828.73	2785.91	3957	4213.3	Promoter (<=1kb)	8	121084386	121088154	3769	1	15227	uc009nrn.2	0	ENSMUSG00000042812	Foxf1	forkhead box F1	uc009nrn.2;uc009nro.1;uc009nrp.2;uc029wwp.1;uc009nrl.2;uc033jif.2;uc009nrm.2	15227;234814;234814;234814;68790;68790;68790	0;0;0;0;0;0;0
chr14	21966043	22021830	55788	*	11.34	10.97	11.63	-0.66	2e-26	3.12e-24	2001.38	2002.13	2990	3352.15	Promoter (<=1kb)	14	21983962	21989601	5640	2	218820	uc007slv.1	0	ENSMUSG00000039081	Zfp503	zinc finger protein 503	uc007slv.1;uc007slz.2	218820;76633	0;0
chr13	31606361	31651520	45160	*	10.96	10.58	11.27	-0.69	2.41e-26	3.7e-24	1511.37	1541.08	2360	2570.79	Promoter (<=1kb)	13	31625816	31631406	5591	1	14238	uc007pzo.2	0	ENSMUSG00000038402	Foxf2	forkhead box F2	uc007pzo.2;uc007pzn.1	14238;71307	0;0
chr12	118829314	118867841	38528	*	10.92	10.51	11.24	-0.73	2.54e-26	3.84e-24	1441.37	1478.3	2284	2549.39	Promoter (<=1kb)	12	118846329	118852578	6250	1	320145	uc007pih.2	0	ENSMUSG00000048562	Sp8	trans-acting transcription factor 8	uc007pih.2;uc007pig.2;uc033ggm.1;uc007pij.2	320145;320145;77706;77706	0;0;0;0
chr18	53449427	53486781	37355	*	10.82	10.38	11.15	-0.77	2.99e-26	4.46e-24	1342.03	1327.23	2126	2422.89	Promoter (<=1kb)	18	53464546	53575857	111312	1	225518	uc008exv.1	0	ENSMUSG00000069378	Prdm6	PR domain containing 6	uc008exv.1	225518	0
chr4	44680822	44749155	68334	*	11.31	10.97	11.58	-0.6	4.84e-26	7.13e-24	2026.71	1998.21	2968	3143.92	Promoter (<=1kb)	4	44531506	44710440	178935	2	18507	uc008srx.1	0	ENSMUSG00000014030	Pax5	paired box 5	uc008srx.1;uc033ibu.1	18507;70602	0;0
chrY	90797458	90814010	16553	*	10.07	10.45	9.54	0.92	7.44e-26	1.08e-23	1464.03	1337.04	788	695.73	Intron (uc029yhc.1/170942, intron 3 of 3)	21	90784610	90816465	31856	1	170942	uc029yhc.1	12848	ENSMUSG00000096768	Erdr1	erythroid differentiation regulator 1	uc029yhc.1;uc029yhe.1;uc029yhf.1	170942;170942;170942	0;0;0
chr15	35281820	35340149	58330	*	11.3	10.97	11.57	-0.59	1.62e-25	2.32e-23	2001.38	2010.96	2945	3114.73	Promoter (<=1kb)	15	35307010	35328535	21526	2	100126269	uc007vmc.1	0	ENSMUSG00000115453	BC048602	cDNA sequence BC048602	uc007vmc.1;uc007vma.1;uc007vmb.1	100126269;107587;107587	0;0;0
chr14	48641972	48720369	78398	*	11.71	11.4	11.97	-0.57	2.71e-25	3.83e-23	2774.06	2624.06	3844	4152	Promoter (<=1kb)	14	48657677	48662872	5196	2	18424	uc007tjq.3	0	ENSMUSG00000021848	Otx2	orthodenticle homeobox 2	uc007tjq.3;uc007tjr.3;uc007tjs.3;uc033gpq.1;uc007tjt.1	18424;18424;18424;18424;606497	0;0;0;0;0
chr2	93632380	93654520	22141	*	9.96	9.46	10.33	-0.87	2.84e-25	3.97e-23	696.02	711.19	1231	1345.73	Promoter (<=1kb)	2	93642434	93680386	37953	1	11695	uc008lgd.2	0	ENSMUSG00000040310	Alx4	aristaless-like homeobox 4	uc008lgd.2;uc012bzt.1	11695;11695	0;0
chr5	28152469	28182704	30236	*	10.61	10.19	10.93	-0.74	2.96e-25	4.08e-23	1183.36	1160.47	1874	2039.51	Promoter (<=1kb)	5	28165696	28172166	6471	1	13799	uc008wtv.1	0	ENSMUSG00000039095	En2	engrailed 2	uc008wtv.1	13799	0
chr14	67223308	67267070	43763	*	10.95	10.57	11.24	-0.67	3.79e-25	5.16e-23	1556.04	1487.13	2343	2510.47	Promoter (<=1kb)	14	67233292	67430952	197661	1	13592	uc007ukw.2	0	ENSMUSG00000022053	Ebf2	early B cell factor 2	uc007ukw.2;uc011znu.2;uc007ukx.2	13592;13592;13592	0;0;0
chr12	9568596	9587712	19117	*	10.1	9.61	10.47	-0.86	4.55e-25	6.12e-23	784.02	779.86	1338	1502.39	Promoter (<=1kb)	12	9574442	9581500	7059	1	23967	uc007nao.2	0	ENSMUSG00000048387	Osr1	odd-skipped related transcription factor 1	uc007nao.2;uc007nan.1	23967;69420	0;0
chr13	72619812	72645402	25591	*	10.44	10.01	10.77	-0.76	5.07e-25	6.74e-23	1050.69	1007.44	1686	1807.92	Promoter (<=1kb)	13	72628797	72634196	5400	1	16372	uc007rde.2	0	ENSMUSG00000001504	Irx2	Iroquois homeobox 2	uc007rde.2;uc011zbn.1	16372;328287	0;0
chr9	98945618	98983140	37523	*	10.75	10.34	11.06	-0.72	6.87e-25	9.02e-23	1277.36	1316.44	2035	2238.98	Promoter (<=1kb)	9	98955607	98958126	2520	1	26927	uc009rdr.2	0	ENSMUSG00000050397	Foxl2	forkhead box L2	uc009rds.1;uc009rdt.2;uc012gyx.1;uc009rdr.2;uc009rdq.2	23873;23873;23873;26927;768252	-3233;-3233;-3233;0;0
chr17	26830725	26866180	35456	*	10.81	10.41	11.12	-0.71	8.23e-25	1.07e-22	1396.03	1328.21	2131	2319.75	Promoter (<=1kb)	17	26838665	26841565	2901	2	18091	uc008beo.1	0	ENSMUSG00000015579	Nkx2-5	NK2 homeobox 5	uc008beo.1	18091	0
chr15	102881402	103152168	270767	*	13.92	13.47	14.27	-0.8	1.01e-24	1.29e-22	11498.9	11161.3	18661	20728.8	Promoter (<=1kb)	15	102944062	102947946	3885	2	100503872	uc007xwx.3	0	ENSMUSG00000086903	Hotair	HOX transcript antisense RNA (non-protein coding)	uc007xwx.3;uc007xwy.1;uc007xww.1;uc007xwv.1;uc007xxf.1;uc007xxg.1;uc007xxe.1;uc007xxc.1;uc007xxd.1;uc012aaf.1;uc007xxa.1;uc007xwz.3;uc029svj.1;uc007xxh.1;uc007xxi.1;uc007xxj.1;uc012aae.1;uc012aag.1	100503872;109663;15421;15422;15423;15423;15424;15425;15425;15426;15427;209448;432989;71726;71726;71726;723958;751557	0;0;0;0;0;0;0;0;0;0;0;0;0;11269;0;11269;0;0
chr1	56945874	56989204	43331	*	10.77	10.4	11.06	-0.66	2.32e-24	2.94e-22	1358.03	1347.83	2104	2176.71	Promoter (<=1kb)	1	56793981	56971334	177354	2	212712	uc007bas.1	0	ENSMUSG00000038331	Satb2	special AT-rich sequence binding protein 2	uc007bas.1;uc011wlc.1;uc011wld.1;uc029qoo.1;uc007bat.2	212712;212712;329160;329160;329160	0;0;0;0;0
chr14	28500300	28525929	25630	*	10.43	9.97	10.78	-0.81	2.91e-24	3.62e-22	1013.36	986.84	1637	1880.9	Promoter (<=1kb)	14	28505473	28525515	20043	1	22418	uc007sug.2	0	ENSMUSG00000021994	Wnt5a	wingless-type MMTV integration site family, member 5A	uc007sug.2;uc007suh.2	22418;22418	0;0
chr3	87945951	88008812	62862	*	11.26	10.93	11.53	-0.59	2.92e-24	3.62e-22	1983.38	1929.54	2863	3042.72	Promoter (<=1kb)	3	87987531	88000356	12826	2	12032	uc008pto.2	0	ENSMUSG00000004892	Bcan	brevican	uc008pto.2;uc008ptp.2;uc008ptk.1;uc008ptl.1;uc008ptm.1;uc008ptn.1	12032;12032;12904;18008;18008;18008	0;0;0;0;0;0
chr5	33394951	33489008	94058	*	12.03	11.75	12.27	-0.52	3.6e-24	4.4e-22	3385.41	3502.01	4687	5158.13	Promoter (<=1kb)	5	33430734	33434090	3357	2	672284	uc056zzg.1	0	ENSMUSG00000029112	Nkx1-1	NK1 homeobox 1	uc056zzg.1;uc008xar.1;uc012duq.1;uc008xas.2;uc012dur.1	672284;71101;71101;71101;71101	0;0;0;0;0
chr18	11041686	11067743	26058	*	10.45	10.02	10.78	-0.76	4.85e-24	5.88e-22	1052.02	1022.16	1674	1834.2	Promoter (<=1kb)	18	11052510	11057583	5074	1	14465	uc008ebj.1	0	ENSMUSG00000005836	Gata6	GATA binding protein 6	uc008ebj.1;uc008ebk.1;uc033hfu.1;uc008ebh.4;uc008ebi.2	14465;14465;68434;68434;68434	0;0;0;0;0
chr5	37815063	37844772	29710	*	10.71	10.29	11.04	-0.75	6.71e-24	8.04e-22	1282.03	1218.35	1973	2227.31	Promoter (<=1kb)	5	37820491	37824585	4095	2	17701	uc008xfw.1	0	ENSMUSG00000048450	Msx1	msh homeobox 1	uc008xfw.1;uc012dvm.1	17701;93895	0;0
chr13	53444352	53488060	43709	*	10.85	10.47	11.15	-0.68	8.71e-24	1.03e-21	1466.7	1363.53	2199	2349.91	Promoter (<=1kb)	13	53466881	53472780	5900	2	17702	uc007qnw.1	0	ENSMUSG00000021469	Msx2	msh homeobox 2	uc007qnl.2;uc007qnm.2;uc007qnn.2;uc007qnw.1	100040421;100040421;100040421;17702	0;0;0;0
chr6	85173923	85197430	23508	*	10.24	9.77	10.6	-0.82	8.85e-24	1.04e-21	865.35	882.86	1448	1646.4	Promoter (<=1kb)	6	85187931	85204463	16533	1	13796	uc009cpi.1	0	ENSMUSG00000033726	Emx1	empty spiracles homeobox 1	uc009cpi.1	13796	0
chr9	87707620	87758262	50643	*	11.04	10.71	11.32	-0.61	2.2e-23	2.55e-21	1672.04	1666.64	2477	2618.47	Promoter (<=1kb)	9	87702800	87731260	28461	2	76365	uc009qyh.2	0	ENSMUSG00000032419	Tbx18	T-box18	uc009qyh.2	76365	0
chr13	48619491	48687451	67961	*	11.48	11.15	11.75	-0.6	4.5e-23	5.16e-21	2311.39	2233.64	3251	3633.36	Promoter (<=1kb)	13	48663036	48666507	3472	1	12022	uc007qil.1	0	ENSMUSG00000021381	Barx1	BarH-like homeobox 1	uc007qil.1;uc007qii.2;uc007qij.2;uc007qik.2	12022;218232;218232;218232	0;0;0;0
chr13	83697615	83754387	56773	*	11.08	10.76	11.34	-0.58	6.87e-23	7.8e-21	1748.04	1724.52	2569	2630.15	Promoter (<=1kb)	13	83721556	83741244	19689	1	320203	uc033gmo.1	0	ENSMUSG00000050334	C130071C03Rik	RIKEN cDNA C130071C03 gene	uc033gmo.1;uc033gmp.1;uc007ril.1;uc007rim.1;uc011zch.1	320203;320203;320203;320203;723967	0;0;0;0;0
chr1	19199030	19257512	58483	*	11.32	10.97	11.6	-0.62	7.99e-23	8.98e-21	2079.38	1940.33	2944	3252.9	Promoter (<=1kb)	1	19208914	19238845	29932	1	21419	uc007akq.2	0	ENSMUSG00000025927	Tfap2b	transcription factor AP-2 beta	uc007akq.2;uc007akr.2;uc007aks.1;uc007akt.2;uc007aku.2	21419;21419;21419;21419;21419	0;0;0;0;0
chr16	91201477	91239297	37821	*	10.75	10.36	11.06	-0.71	8.18e-23	9.1e-21	1318.7	1308.59	2017	2266.23	Promoter (<=1kb)	16	91225550	91228677	3128	1	50913	uc007zxe.1	0	ENSMUSG00000039830	Olig2	oligodendrocyte transcription factor 2	uc007zxe.1	50913	0
chr2	18017995	18062663	44669	*	11.13	10.8	11.4	-0.6	8.48e-23	9.34e-21	1812.04	1760.82	2617	2786.81	Promoter (<=1kb)	2	18027249	18030577	3329	1	100034739	uc008ilk.2	0	NA	Gm17762	predicted gene, 17762	uc008ilk.2;uc033hln.1;uc008ilm.2;uc008iln.1;uc008ilo.2;uc008ilp.2;uc008ilq.2;uc008ilr.2;uc008ils.2;uc008ill.1;uc008ilj.3;uc012brc.1	100034739;102466840;17354;17354;17354;17354;17354;17354;17354;72668;77940;77940	0;0;0;0;-1922;-1922;-1922;-1922;-1922;0;0;0
chr18	64320479	64352624	32146	*	10.82	10.43	11.13	-0.71	1.15e-22	1.26e-20	1310.7	1444.95	2142	2355.75	Promoter (<=1kb)	18	64340364	64398488	58125	1	225631	uc008fef.1	0	ENSMUSG00000045991	Onecut2	one cut domain, family member 2	uc008fef.1	225631	0
chr17	85679069	85695673	16605	*	9.28	8.7	9.7	-1	2.38e-22	2.57e-20	428.68	402.19	793	865.04	Promoter (<=1kb)	17	85684268	85688254	3987	2	20472	uc008duc.2	0	ENSMUSG00000024134	Six2	sine oculis-related homeobox 2	uc008duc.2	20472	0
chr5	147259020	147281022	22003	*	10.17	9.74	10.49	-0.76	2.88e-22	3.08e-20	858.69	849.51	1397	1487.79	Promoter (<=1kb)	5	147270131	147275149	5019	1	18609	uc009any.2	0	ENSMUSG00000029644	Pdx1	pancreatic and duodenal homeobox 1	uc033inv.1;uc009any.2;uc009anx.1	102465309;18609;70147	2276;0;0
chr18	80699109	80719916	20808	*	10.09	9.63	10.44	-0.81	3.15e-22	3.34e-20	804.69	780.84	1311	1466.38	Promoter (<=1kb)	18	80606205	80708173	101969	2	18018	uc012bfk.1	0	ENSMUSG00000033016	Nfatc1	nuclear factor of activated T cells, cytoplasmic, calcineurin dependent 1	uc012bfk.1;uc012bfl.1;uc008fte.2;uc012bfm.1;uc008ftf.2;uc008ftg.2	18018;18018;18018;18018;18018;18018	0;0;0;0;0;0
chr12	104461678	104483442	21765	*	10.08	9.63	10.42	-0.79	3.24e-22	3.4e-20	810.02	777.9	1317	1423.57	Promoter (<=1kb)	12	104471209	104473236	2028	2	14836	uc007oxh.1	0	ENSMUSG00000021095	Gsc	goosecoid homeobox	uc007oxh.1	14836	0
chr1	4481852	4530113	48262	*	10.95	10.59	11.23	-0.63	3.33e-22	3.45e-20	1528.7	1561.68	2295	2503.65	Promoter (<=1kb)	1	4490928	4493735	2808	2	20671	uc007aey.1	0	ENSMUSG00000025902	Sox17	SRY (sex determining region Y)-box 17	uc007aey.1;uc007aez.2;uc007afa.2;uc007afb.2;uc007afc.2;uc033fhy.1	20671;20671;20671;20671;20671;20671	0;0;0;0;0;0
chr5	29464315	29505661	41347	*	10.87	10.48	11.18	-0.7	4.09e-22	4.2e-20	1400.7	1458.68	2166	2467.65	Promoter (<=1kb)	5	29473823	29478470	4648	2	15285	uc008wuk.2	0	ENSMUSG00000001566	Mnx1	motor neuron and pancreas homeobox 1	uc008wuk.2	15285	0
chr5	75140094	75173199	33106	*	10.39	9.99	10.7	-0.72	4.45e-22	4.53e-20	1014.02	1016.27	1606	1730.08	Promoter (<=1kb)	5	75152291	75175150	22860	1	18595	uc008xua.1	0	ENSMUSG00000029231	Pdgfra	platelet derived growth factor receptor, alpha polypeptide	uc008xtz.1;uc033ikb.1;uc008xua.1;uc008xub.1;uc008xuc.1;uc008xud.1;uc008xue.1;uc008xuf.4	100503184;102465620;18595;18595;18595;18595;18595;18595	0;-3632;0;0;0;0;0;0
chr3	107574522	107601306	26785	*	10.38	9.97	10.7	-0.73	4.67e-22	4.71e-20	1030.02	975.07	1603	1723.27	Promoter (<=1kb)	3	107595031	107605875	10845	1	11694	uc008qxf.2	0	ENSMUSG00000014603	Alx3	aristaless-like homeobox 3	uc008qxf.2	11694	0
chr19	46118576	46152805	34230	*	10.51	10.1	10.82	-0.72	8.1e-22	8.1e-20	1131.36	1062.37	1727	1894.53	Promoter (<=1kb)	19	46152558	46255997	103440	1	107338	uc008hsm.1	0	ENSMUSG00000025224	Gbf1	golgi-specific brefeldin A-resistance factor 1	uc008hsm.1;uc008hsn.1;uc008hso.1;uc008hsp.1;uc008hsk.1;uc008hsl.2	107338;107338;107338;107338;12686;18742	0;0;0;0;0;0
chr9	69743858	69796501	52644	*	11.14	10.81	11.41	-0.6	2.7e-21	2.68e-19	1814.71	1785.34	2595	2850.06	Promoter (<=1kb)	9	69758740	69830199	71460	1	319970	uc009qnj.2	0	ENSMUSG00000097623	B230323A14Rik	RIKEN cDNA B230323A14 gene	uc009qnj.2;uc029xeo.1;uc012gwj.1	319970;319970;64290	0;0;0
chr4	9816386	9866296	49911	*	10.87	10.52	11.14	-0.62	3.07e-21	3.02e-19	1487.37	1450.83	2180	2346.99	Promoter (<=1kb)	4	9844372	9862345	17974	1	242316	uc008ryt.1	0	ENSMUSG00000051279	Gdf6	growth differentiation factor 6	uc008ryt.1;uc008ryq.1;uc008rys.1	242316;320152;320152	0;0;0
chr7	43146181	43226552	80372	*	11.69	11.92	11.43	0.49	3.16e-21	3.08e-19	3932.76	3793.35	2834	2682.7	Promoter (<=1kb)	7	43214039	43226842	12804	1	100170401	uc012fjc.1	0	ENSMUSG00000074887	EU599041	expressed sequence EU599041	uc012fjc.1;uc012fjd.1;uc009gmh.1	100170401;100170401;668620	0;0;0
chrX	12075755	12097186	21432	*	9.49	8.94	9.88	-0.94	3.24e-21	3.12e-19	476.01	509.12	883	1004.19	Promoter (<=1kb)	20	12036737	12080553	43817	2	71458	uc009sqq.3	0	ENSMUSG00000040363	Bcor	BCL6 interacting corepressor	uc009sqq.3;uc009sqr.3;uc009sqs.3;uc009sqt.3;uc009squ.2	71458;71458;71458;71458;71458	0;0;0;0;0
chr11	57822480	57851893	29414	*	10.46	10.04	10.78	-0.74	3.31e-21	3.16e-19	1113.36	992.73	1696	1830.3	Promoter (<=1kb)	11	57828713	57832147	3435	2	15110	uc007jaf.1	0	ENSMUSG00000037335	Hand1	heart and neural crest derivatives expressed 1	uc007jaf.1	15110	0
chr13	116284844	116335576	50733	*	10.96	10.61	11.24	-0.64	3.52e-21	3.34e-19	1640.04	1475.36	2384	2457.92	Promoter (<=1kb)	13	116298270	116309688	11419	2	16392	uc007rye.2	0	ENSMUSG00000042258	Isl1	ISL1 transcription factor, LIM/homeodomain	uc007rye.2;uc007ryf.2;uc007ryg.2	16392;16392;16392	0;0;0
chr7	79480205	79599199	118995	*	12.47	12.09	12.76	-0.67	3.57e-21	3.35e-19	4416.77	4328.96	6607	7305.65	Promoter (<=1kb)	7	79500026	79534403	34378	1	101694	uc009hyl.2	0	ENSMUSG00000097023	Mir9-3hg	Mir9-3 host gene	uc009hyl.2;uc029wme.1;uc029wmf.1;uc009hym.2;uc029wmg.1;uc009hyo.2;uc012fnh.1	101694;101694;101694;101694;101694;56315;723968	0;0;0;0;0;0;0
chr11	119032135	119110833	78699	*	12.16	11.69	12.52	-0.83	4.39e-21	4.09e-19	3360.08	3233.23	5523	6234.32	Promoter (<=1kb)	11	119077571	119082656	5086	2	12418	uc007mpv.2	0	ENSMUSG00000039989	Cbx4	chromobox 4	uc007mpt.2;uc007mpv.2;uc007mpw.2;uc007mpx.2;uc007mpu.1	12416;12418;12418;12418;30951	0;0;0;0;0
chr10	50885253	50933616	48364	*	11.06	10.72	11.33	-0.61	5.07e-21	4.68e-19	1745.37	1634.27	2482	2666.15	Promoter (<=1kb)	10	50895651	50989152	93502	1	20464	uc007fal.1	0	ENSMUSG00000019913	Sim1	single-minded family bHLH transcription factor 1	uc007fal.1	20464	0
chr7	115988285	116049383	61099	*	11.26	10.96	11.5	-0.54	5.11e-21	4.68e-19	2017.38	1969.76	2831	2966.83	Promoter (<=1kb)	7	115470872	115995086	524215	2	20679	uc009jiq.2	0	ENSMUSG00000051910	Sox6	SRY (sex determining region Y)-box 6	uc009jiq.2;uc009jir.2;uc009jis.2;uc009jit.1;uc009jiu.1	20679;20679;20679;20679;20679	0;0;0;0;0
chr6	88171512	88219544	48033	*	10.95	10.62	11.22	-0.6	5.16e-21	4.68e-19	1582.7	1556.78	2299	2470.57	Promoter (<=1kb)	6	88193891	88207032	13142	1	14461	uc009cvc.2	0	ENSMUSG00000015053	Gata2	GATA binding protein 2	uc009cvc.2;uc009cvd.2;uc009cve.1	14461;14461;56691	0;0;-2724
chr3	131077497	131130515	53019	*	10.99	10.65	11.26	-0.6	8.83e-21	7.95e-19	1676.04	1543.04	2413	2480.3	Promoter (<=1kb)	3	131110297	131224357	114061	1	16842	uc008rjf.2	0	ENSMUSG00000027985	Lef1	lymphoid enhancer binding factor 1	uc008rjf.2;uc008rjg.2;uc008rji.2;uc008rjj.2;uc008rjk.2	16842;16842;16842;16842;16842	0;0;0;0;0
chr17	15360531	15397390	36860	*	10.79	10.45	11.07	-0.62	9.89e-21	8.84e-19	1403.37	1399.82	2080	2222.44	Promoter (<=1kb)	17	15367354	15375823	8470	2	13388	uc008aoi.2	0	ENSMUSG00000014773	Dll1	delta like canonical Notch ligand 1	uc008aoi.2;uc008aoj.2;uc008aok.2	13388;67544;67544	0;0;0
chr8	70468277	70528254	59978	*	11.54	11.27	11.77	-0.5	1.02e-20	9.08e-19	2474.72	2453.37	3378	3583.74	Promoter (<=1kb)	8	70493131	70504081	10951	1	12931	uc009maj.2	0	ENSMUSG00000007888	Crlf1	cytokine receptor-like factor 1	uc009maj.2;uc009mak.1;uc009mao.2;uc009map.2;uc009maq.2;uc009mar.2;uc009mas.2;uc009mam.1;uc029wts.1;uc009maf.1;uc009mah.2;uc012gfb.1;uc009mal.1;uc009mai.2;uc009man.2	12931;12931;14232;14232;14232;14232;14232;22186;234378;234378;234378;234378;66462;67937;75620	0;0;0;0;0;0;0;0;0;0;0;0;0;0;0
chr18	42374800	42430839	56040	*	11.12	10.81	11.37	-0.55	2.49e-20	2.19e-18	1793.37	1808.88	2570	2711.89	Promoter (<=1kb)	18	42394597	42396093	1497	1	18998	uc008etv.2	0	ENSMUSG00000024497	Pou4f3	POU domain, class 4, transcription factor 3	uc008etv.2	18998	0
chr10	83394679	83419563	24885	*	9.21	9.61	8.66	0.95	2.55e-20	2.22e-18	796.68	765.15	413	397	Exon (uc011xkg.2/uc011xkg.2, exon 1 of 1)	10	83360221	83368835	8615	1	28109	uc007gkg.2	34458	ENSMUSG00000020255	D10Wsu102e	DNA segment, Chr 10, Wayne State University 102, expressed	NA	NA	NA
chr18	34531554	34572192	40639	*	10.75	10.41	11.03	-0.61	2.99e-20	2.59e-18	1375.36	1349.79	2025	2148.49	Promoter (<=1kb)	18	34542328	34548061	5734	1	20890	uc008ekq.2	0	ENSMUSG00000012282	Wnt8a	wingless-type MMTV integration site family, member 8A	uc008ekq.2;uc008ekr.1;uc008eks.1;uc008ekt.1	20890;75533;75533;75533	0;0;0;0
chr6	23241130	23287950	46821	*	10.99	10.65	11.26	-0.61	3.05e-20	2.61e-18	1657.37	1546.97	2354	2551.33	Promoter (<=1kb)	6	23245047	23248264	3218	2	73191	uc009bbd.2	0	ENSMUSG00000029697	Fezf1	Fez family zinc finger 1	uc009bbg.3;uc033ioh.2;uc033ioi.2;uc057lpd.1;uc012ein.1;uc009bbd.2	320405;320405;320405;320405;320405;73191	0;0;0;0;0;0
chr12	73014357	73057093	42737	*	10.82	10.49	11.09	-0.6	3.07e-20	2.61e-18	1474.03	1400.8	2162	2190.33	Promoter (<=1kb)	12	73041827	73046712	4886	2	20471	uc007nwa.2	0	ENSMUSG00000051367	Six1	sine oculis-related homeobox 1	uc007nwa.2	20471	0
chr6	127144958	127164834	19877	*	10.09	9.65	10.43	-0.78	3.16e-20	2.67e-18	829.35	777.9	1302	1448.87	Promoter (<=1kb)	6	127125708	127151048	25341	2	12444	uc009dvr.2	0	ENSMUSG00000000184	Ccnd2	cyclin D2	uc009dvr.2;uc009dvs.1;uc009dvt.2;uc009dvu.2;uc029vyr.1	12444;12444;77558;77558;77558	0;0;0;0;0
chrY	90717408	90744602	27195	*	10.29	10.8	9.5	1.3	3.21e-20	2.69e-18	1906.04	1650.95	771	676.27	Distal Intergenic	21	90751140	90755050	3911	2	654820	uc057mdi.1	10448	ENSMUSG00000072844	G530011O06Rik	RIKEN cDNA G530011O06 gene	NA	NA	NA
chr9	118455448	118494102	38655	*	10.67	10.33	10.95	-0.62	3.58e-20	2.98e-18	1280.03	1291.92	1924	2038.54	Promoter (<=1kb)	9	118478189	118482757	4569	1	13813	uc009rzo.2	0	ENSMUSG00000032446	Eomes	eomesodermin	uc009rzo.2;uc009rzp.2;uc009rzq.2	13813;13813;13813	0;0;0
chr19	59153348	59204251	50904	*	10.94	10.6	11.22	-0.62	3.81e-20	3.14e-18	1513.37	1585.22	2264	2502.68	Promoter (<=1kb)	19	59164485	59170029	5545	2	22326	uc008ibg.2	0	ENSMUSG00000006270	Vax1	ventral anterior homeobox 1	uc008ibg.2	22326	0
chr14	63225539	63293488	67950	*	11.4	11.1	11.64	-0.54	6.36e-20	5.21e-18	2222.05	2178.7	3048	3330.75	Promoter (<=1kb)	14	63198914	63245271	46358	2	14463	uc007uhn.2	0	ENSMUSG00000021944	Gata4	GATA binding protein 4	uc007uhn.2;uc007uho.2;uc007uhp.1	14463;14463;14463	0;0;0
chr3	66932967	66989496	56530	*	11.11	10.81	11.36	-0.56	7.27e-20	5.87e-18	1820.04	1762.78	2554	2720.64	Promoter (<=1kb)	3	66971723	66978811	7089	2	20429	uc056zss.1	0	ENSMUSG00000027833	Shox2	short stature homeobox 2	uc056zss.1;uc008plc.2;uc008pld.2;uc008ple.2;uc008plf.1;uc008plg.1;uc008plh.1;uc008pli.1;uc008plj.1	20429;20429;20429;20429;66880;66880;66880;66880;66880	0;0;0;0;0;0;0;0;0
chr12	20206949	20323364	116416	*	11.96	12.15	11.74	0.41	7.27e-20	5.87e-18	4616.11	4497.68	3450	3412.48	Exon (uc029rrg.3/uc029rrg.3, exon 2 of 4)	12	20804389	20815779	11391	2	69513	uc007nde.3	492415	ENSMUSG00000099759	1700030C10Rik	RIKEN cDNA 1700030C10 gene	NA	NA	NA
chr11	77905267	77981528	76262	*	11.51	11.25	11.73	-0.48	8.53e-20	6.84e-18	2455.39	2431.79	3337	3464.05	Promoter (<=1kb)	11	77930839	77964091	33253	1	20370	uc007khn.2	0	ENSMUSG00000000632	Sez6	seizure related gene 6	uc007khn.2;uc007kho.2;uc007khp.2;uc011yaa.2;uc007khr.2;uc007khs.2;uc007kht.3;uc011xzz.1	20370;20370;20370;20370;268448;268448;268448;791423	0;0;0;0;-1288;-1288;-1288;0
chr9	2999869	3038518	38650	*	17.27	17.5	16.99	0.52	1.01e-19	8.07e-18	192911	179075	132464	127330	Promoter (<=1kb)	9	3038669	3038743	75	2	100628572	uc029wxb.1	225	ENSMUSG00000106183	Mir101c	microRNA 101c	uc029wxb.1	100628572	225
chr11	83837119	83858941	21823	*	9.81	9.34	10.16	-0.83	1.08e-19	8.49e-18	677.35	615.06	1090	1204.63	Promoter (<=1kb)	11	83850869	83905917	55049	1	21410	uc007kpx.2	0	ENSMUSG00000020679	Hnf1b	HNF1 homeobox B	uc007kpx.2;uc007kpy.2;uc056ynm.1	21410;21410;21410	0;0;0
chr2	70553323	70586926	33604	*	10.37	9.98	10.67	-0.69	1.09e-19	8.53e-18	1006.02	1013.33	1553	1705.75	Promoter (<=1kb)	2	70562129	70577130	15002	1	14415	uc008jzj.2	0	ENSMUSG00000070880	Gad1	glutamate decarboxylase 1	uc008jzj.2;uc056znb.2;uc008jzk.2;uc056znc.1;uc008jzl.1;uc008jzm.2;uc029txz.1	14415;14415;14415;14415;14415;14415;68986	0;0;0;0;0;0;0
chr5	147168762	147195435	26674	*	10.17	9.77	10.49	-0.71	1.16e-19	9.05e-18	890.69	861.28	1386	1480.98	Promoter (<=1kb)	5	147188696	147190947	2252	1	14842	uc009anw.2	0	ENSMUSG00000053129	Gsx1	GS homeobox 1	uc009anw.2	14842	0
chr5	75056953	75130321	73369	*	11.43	11.16	11.66	-0.5	1.27e-19	9.82e-18	2349.39	2213.04	3201	3258.74	Promoter (<=1kb)	5	75110321	75147107	36787	1	100503184	uc008xtz.1	0	ENSMUSG00000107192	Gm19583	predicted gene, 19583	uc008xtz.1;uc008xtx.1;uc008xty.1	100503184;14843;14843	0;0;0
chr2	84864772	84895835	31064	*	10.51	10.16	10.8	-0.64	1.28e-19	9.82e-18	1156.03	1126.14	1736	1820.57	Promoter (<=1kb)	2	84871946	84886692	14747	2	269295	uc008kjm.1	0	ENSMUSG00000050896	Rtn4rl2	reticulon 4 receptor-like 2	uc008kjm.1;uc008kji.1;uc008kjj.1;uc008kjk.1;uc008kjl.1	269295;72401;72401;72401;72401	0;0;0;0;0
chr11	18861893	18894108	32216	*	10.41	10.02	10.72	-0.7	1.46e-19	1.11e-17	1062.02	1010.38	1596	1778.73	3' UTR	11	18880428	19018969	138542	2	17268	uc007icl.2	124861	ENSMUSG00000020160	Meis1	Meis homeobox 1	uc007icl.2;uc007icm.2;uc007icn.2	17268;17268;17268	0;0;0
chr8	121107179	121196900	89722	*	11.86	11.61	12.07	-0.46	1.7e-19	1.29e-17	3072.07	3166.52	4123	4464.35	Promoter (<=1kb)	8	121116171	121118895	2725	1	14234	uc012glx.2	0	ENSMUSG00000046714	Foxc2	forkhead box C2	uc012glx.2;uc009nrs.1;uc009nro.1;uc009nrp.2;uc029wwp.1	14234;14241;234814;234814;234814	0;0;0;0;0
chr19	16845814	16900902	55089	*	10.99	10.67	11.25	-0.58	2.04e-19	1.53e-17	1595.37	1659.78	2339	2535.76	Promoter (<=1kb)	19	16872316	16873830	1515	2	14240	uc008gxc.1	0	ENSMUSG00000056829	Foxb2	forkhead box B2	uc008gxc.1	14240	0
chr13	31765638	31825029	59392	*	11.08	10.75	11.35	-0.6	2.26e-19	1.69e-17	1739.37	1696.07	2454	2756.65	Promoter (<=1kb)	13	31806646	31810635	3990	1	17300	uc007pzp.1	0	ENSMUSG00000050295	Foxc1	forkhead box C1	uc007pzp.1;uc007pzq.1	17300;218138	0;0
chr9	24758172	24788727	30556	*	10.48	10.11	10.78	-0.67	3.09e-19	2.29e-17	1097.36	1115.35	1670	1841.98	Promoter (<=1kb)	9	24720812	24774303	53492	2	57246	uc009ope.2	0	ENSMUSG00000031965	Tbx20	T-box 20	uc009ope.2;uc009opf.2;uc029wyb.1;uc009opg.2	57246;57246;57246;57246	0;0;0;0
chrX	12121164	12143189	22026	*	9.53	9.01	9.91	-0.89	4.31e-19	3.17e-17	502.68	530.7	886	1033.38	Exon (uc009sqv.2/71458, exon 2 of 4)	20	12036737	12160355	123619	2	71458	uc009squ.2	17166	ENSMUSG00000040363	Bcor	BCL6 interacting corepressor	uc009squ.2;uc009sqv.2	71458;71458	0;0
chr3	30497934	30527448	29515	*	10.53	10.18	10.81	-0.63	4.43e-19	3.24e-17	1177.36	1148.7	1751	1845.87	Promoter (<=1kb)	3	30236569	30509487	272919	2	14013	uc008ouv.1	0	ENSMUSG00000027684	Mecom	MDS1 and EVI1 complex locus	uc008our.1;uc008ouv.1	14013;14013	0;0
chr7	37762437	37786703	24267	*	10.03	9.62	10.34	-0.72	5.63e-19	4.09e-17	813.35	762.2	1278	1321.4	Promoter (<=1kb)	7	37479109	37769752	290644	2	243937	uc009gkl.1	0	ENSMUSG00000043456	Zfp536	zinc finger protein 536	uc009gkl.1;uc012fip.1;uc009gkm.1;uc009gko.1	243937;243937;243937;243937	0;0;0;0
chrY	258354	269943	11590	*	9.21	9.6	8.65	0.95	6.2e-19	4.48e-17	824.02	732.77	415	390.19	Distal Intergenic	21	206150	207789	1640	1	69438	uc057atw.1	52204	ENSMUSG00000101796	1700020D14Rik	RIKEN cDNA 1700020D14 gene	NA	NA	NA
chr10	127506666	127536431	29766	*	10.41	10.05	10.69	-0.64	6.36e-19	4.56e-17	1081.36	1035.89	1630	1679.48	Promoter (<=1kb)	10	127525473	127534559	9087	2	104080	uc007hjw.1	0	ENSMUSG00000040258	Nxph4	neurexophilin 4	uc007hjw.1;uc007hju.2;uc007hjv.2;uc007hjx.2;uc007hjr.1;uc007hjs.1;uc007hjt.3	104080;108037;108037;16971;237611;237611;407790	0;0;0;84717;0;0;0
chr3	93420904	93457555	36652	*	10.67	10.34	10.94	-0.6	6.5e-19	4.63e-17	1294.7	1288.98	1906	2016.16	Promoter (<=1kb)	3	93442330	93449077	6748	1	99681	uc012cti.1	0	ENSMUSG00000052415	Tchh	trichohyalin	uc012cti.1	99681	0
chr14	61657821	61696307	38487	*	10.65	10.3	10.94	-0.63	6.67e-19	4.72e-17	1252.03	1273.28	1863	2058	Promoter (<=1kb)	14	61602836	61682373	79538	2	668253	uc007ugb.2	0	ENSMUSG00000097589	Dleu2	deleted in lymphocytic leukemia, 2	uc007ugb.2;uc007ugc.2;uc007ugi.2	668253;668253;668253	0;0;0
chr7	70271065	70292189	21125	*	10.05	9.62	10.38	-0.76	8.52e-19	5.99e-17	814.02	758.28	1256	1400.22	Exon (uc009hnh.2/624549, exon 2 of 4)	7	70178868	70337852	158985	2	624549	uc057ahu.1	45663	ENSMUSG00000109097	Gm29683	predicted gene, 29683	uc057ahu.1;uc009hnh.2	624549;624549	0;0
chr12	56492648	56577794	85147	*	11.74	11.48	11.95	-0.47	1.02e-18	7.09e-17	2889.4	2833.98	3795	4137.4	Promoter (<=1kb)	12	56490428	56505685	15258	2	104798	uc007npd.2	0	ENSMUSG00000112343	Sfta3-ps	surfactant associated 3, pseudogene	uc007npd.2;uc007npe.2;uc056yqo.1;uc007npf.3;uc007npg.3	104798;104798;104798;21869;21869	0;0;0;0;0
chr2	118880184	118906466	26283	*	10.11	9.7	10.42	-0.72	1.17e-18	8.09e-17	846.02	821.06	1307	1431.35	Promoter (<=1kb)	2	118901615	118924524	22910	1	228536	uc008lsw.1	0	ENSMUSG00000040007	Bahd1	bromo adjacent homology domain containing 1	uc008lsw.1;uc008lsv.1	228536;56357	0;0
chr4	48032244	48065622	33379	*	10.47	10.1	10.77	-0.66	1.37e-18	9.45e-17	1136.03	1066.3	1668	1822.52	Promoter (<=1kb)	4	48045305	48050161	4857	1	18124	uc029uuf.2	0	ENSMUSG00000028341	Nr4a3	nuclear receptor subfamily 4, group A, member 3	uc029uuf.2;uc008suu.2;uc008suv.1	18124;18124;18124	0;0;0
chr17	6722607	6750794	28188	*	9.59	9.95	9.11	0.85	1.55e-18	1.06e-16	1055.36	927	551	550.75	3' UTR	17	6738131	6782780	44650	2	22350	uc008ahv.1	31986	ENSMUSG00000052397	Ezr	ezrin	uc008ahv.1;uc008ahq.2;uc008ahr.2;uc008ahs.2;uc012ajk.1;uc008aht.2;uc008ahu.2	22350;83672;83672;83672;83672;83672;83672	0;0;0;0;0;0;0
chr13	73248497	73280143	31647	*	10.45	10.06	10.76	-0.69	2.32e-18	1.58e-16	1116.69	1020.19	1635	1823.49	Promoter (<=1kb)	13	73260497	73269620	9124	1	50916	uc007rdf.2	0	ENSMUSG00000021604	Irx4	Iroquois homeobox 4	uc007rdf.2	50916	0
chr1	190153767	190183836	30070	*	10.35	9.98	10.64	-0.65	2.38e-18	1.61e-16	1015.36	1010.38	1536	1645.43	Promoter (<=1kb)	1	190170296	190217276	46981	1	102632463	uc007ebd.1	0	ENSMUSG00000079045	LOC102632463	uncharacterized LOC102632463	uc007ebd.1;uc033fol.2;uc007ebc.2	102632463;19130;19130	0;0;0
chr13	112971067	113017484	46418	*	10.94	10.63	11.19	-0.56	2.6e-18	1.75e-16	1608.04	1556.78	2258	2413.16	Promoter (<=1kb)	13	112987802	112990778	2977	1	218630	uc007rwz.1	0	ENSMUSG00000042417	Ccno	cyclin O	uc007rwx.1;uc007rwz.1;uc007rxa.1	218629;218630;622408	43274;0;0
chr11	96989634	97021736	32103	*	10.22	9.84	10.52	-0.68	2.77e-18	1.84e-16	898.02	934.85	1410	1531.58	Promoter (<=1kb)	11	97013569	97024738	11170	1	83395	uc007ldh.2	0	ENSMUSG00000038560	Sp6	trans-acting transcription factor 6	uc007ldj.1;uc007ldh.2;uc007ldi.2	100127433;83395;83395	0;0;0
chr2	147336850	147382621	45772	*	10.83	10.5	11.1	-0.61	2.77e-18	1.84e-16	1463.37	1424.35	2082	2316.83	Promoter (<=1kb)	2	147364994	147375049	10056	1	18503	uc008msx.3	0	ENSMUSG00000037034	Pax1	paired box 1	uc008msx.3;uc008msy.1;uc008msv.2	18503;18503;99041	0;0;0
chr4	46331758	46356839	25082	*	10.23	9.85	10.53	-0.68	3e-18	1.98e-16	908.02	936.81	1416	1534.5	Promoter (<=1kb)	4	46344194	46345309	1116	1	110805	uc008sto.1	0	ENSMUSG00000070990	Foxe1	forkhead box E1	uc008sto.1	110805	0
chrX	31157914	31250016	92103	*	11.24	11.47	10.97	0.49	3.06e-18	2.01e-16	2864.73	2801.61	1983	2039.51	Distal Intergenic	20	31336389	31338317	1929	1	668960	uc029xiz.2	-86373	ENSMUSG00000095716	Btbd35f10	BTB domain containing 35, family member 10	NA	NA	NA
chr4	154630082	154653544	23463	*	10.06	9.67	10.36	-0.69	3.36e-18	2.19e-16	822.69	809.29	1284	1350.59	Promoter (<=1kb)	4	154630691	154636367	5677	2	320939	uc008wby.2	0	NA	5930403L14Rik	RIKEN cDNA 5930403L14 gene	uc008wby.2;uc008wbu.1;uc008wbv.1;uc008wbw.1;uc008wbx.1	320939;70673;70673;70673;70673	0;0;0;0;0
chr5	67084415	67110565	26151	*	10.31	9.92	10.62	-0.7	3.59e-18	2.33e-16	1010.02	927.98	1496	1654.18	Promoter (<=1kb)	5	67094397	67099126	4730	2	18935	uc008xpm.1	0	ENSMUSG00000012520	Phox2b	paired-like homeobox 2b	uc008xpm.1;uc008xpn.1	18935;18935	0;0
chr2	160353560	160398443	44884	*	10.78	10.46	11.05	-0.59	4.43e-18	2.86e-16	1414.03	1393.94	2023	2205.9	Promoter (<=1kb)	2	160363677	160367065	3389	2	16658	uc008nqw.2	0	ENSMUSG00000074622	Mafb	v-maf musculoaponeurotic fibrosarcoma oncogene family, protein B (avian)	uc008nqw.2	16658	0
chr10	67529035	67546136	17102	*	9.6	9.15	9.94	-0.8	5.02e-18	3.22e-16	554.68	577.78	942	1027.54	Promoter (<=1kb)	10	67537869	67542188	4320	1	13654	uc007flx.1	0	ENSMUSG00000037868	Egr2	early growth response 2	uc007flx.1;uc007fly.2;uc007flz.2	13654;13654;211488	0;0;0
chr2	28903758	28922653	18896	*	9.89	9.45	10.23	-0.78	5.19e-18	3.31e-16	666.68	729.83	1125	1277.61	Promoter (<=1kb)	2	28907680	28916421	8742	2	54422	uc008izh.2	0	ENSMUSG00000026805	Barhl1	BarH like homeobox 1	uc008izg.2;uc008izh.2;uc012btd.1	227674;54422;54422	0;0;0
chr5	119828898	119849539	20642	*	9.96	9.51	10.31	-0.79	6.23e-18	3.95e-16	768.68	691.57	1178	1353.51	Promoter (<=1kb)	5	119834663	119885218	50556	1	21388	uc008zgz.2	0	ENSMUSG00000018263	Tbx5	T-box 5	uc008zgz.2	21388	0
chr14	12310298	12360968	50671	*	10.96	10.65	11.21	-0.56	6.78e-18	4.27e-16	1627.37	1597	2277	2469.6	Promoter (<=1kb)	14	12341892	12345844	3953	2	54713	uc007sft.2	0	ENSMUSG00000021743	Fezf2	Fez family zinc finger 2	uc007sft.2;uc007sfs.2	54713;54713	0;0
chr9	55506285	55558202	51918	*	11.02	10.73	11.26	-0.52	7.26e-18	4.55e-16	1692.71	1710.79	2394	2497.82	Promoter (<=1kb)	9	55541149	55546178	5030	1	104360	uc009psm.1	0	ENSMUSG00000032318	Isl2	insulin related protein 2 (islet 2)	uc009psm.1;uc012gts.1;uc012gtt.1;uc009psl.2;uc009psn.1;uc009pso.1;uc012gtu.1	104360;104360;104360;110842;244891;244891;244891	0;0;0;0;0;0;0
chr15	57685476	57707457	21982	*	9.66	9.23	10	-0.77	7.56e-18	4.71e-16	581.35	620.94	1005	1038.24	Promoter (<=1kb)	15	57694667	57839832	145166	1	387609	uc007vsp.1	0	ENSMUSG00000071757	Zhx2	zinc fingers and homeoboxes 2	uc007vsp.1	387609	0
chr15	7803150	7825158	22009	*	10.17	9.76	10.49	-0.74	9.04e-18	5.6e-16	902.02	829.89	1349	1534.5	Promoter (<=1kb)	15	7810048	7837580	27533	1	14573	uc007vee.2	0	ENSMUSG00000022144	Gdnf	glial cell line derived neurotrophic factor	uc007vee.2;uc007vef.2;uc056yye.1;uc056yyf.1	14573;14573;14573;14573	0;0;0;0
chr1	120578519	120633363	54845	*	11	10.67	11.27	-0.6	9.65e-18	5.94e-16	1706.04	1555.8	2349	2586.36	Promoter (<=1kb)	1	120602487	120607991	5505	1	13798	uc007cjm.2	0	ENSMUSG00000058665	En1	engrailed 1	uc007cjm.2	13798	0
chr13	119609497	119622188	12692	*	9.65	10.02	9.15	0.86	9.93e-18	6.08e-16	1125.36	947.6	590	549.77	3' UTR	13	119488039	119610459	122421	1	633640	uc029sdk.1	121458	ENSMUSG00000074634	Tmem267	transmembrane protein 267	uc007sal.2;uc029sdk.1;uc029sdm.1	56838;633640;633640	-1631;0;0
chr4	3050005	3091460	41456	*	11.75	11.95	11.53	0.42	1.03e-17	6.26e-16	3942.09	3964.04	3022	2894.82	Distal Intergenic	4	3172083	3173003	921	1	100312470	uc012dad.1	-80623	ENSMUSG00000115072	Vmn1r2	vomeronasal 1 receptor 2	NA	NA	NA
chr6	83062582	83077468	14887	*	9.51	9.04	9.86	-0.82	1.22e-17	7.4e-16	533.35	522.85	883	976.94	Promoter (<=1kb)	6	83068325	83070225	1901	2	21909	uc009cme.1	0	ENSMUSG00000068327	Tlx2	T cell leukemia, homeobox 2	uc009cly.2;uc009clz.2;uc009cma.2;uc009cme.1;uc009cmf.1;uc009cmg.1;uc009cmh.1;uc009cmb.1;uc009cmc.1;uc009cmd.1	11993;11993;11993;21909;21909;69837;69837;93838;93838;93838	8061;8061;8061;0;0;-922;-1162;4738;0;0
chr11	33168204	33212088	43885	*	10.89	10.58	11.14	-0.56	1.27e-17	7.68e-16	1537.37	1522.44	2168	2337.26	Promoter (<=1kb)	11	33200752	33203588	2837	2	27140	uc007ikg.2	0	ENSMUSG00000040610	Tlx3	T cell leukemia, homeobox 3	uc007ikd.2;uc029rlc.1;uc007ike.2;uc007ikf.2;uc007ikg.2;uc007ikh.2;uc007ikk.3	18148;18148;18148;18148;27140;66011;66011	-4998;-4998;-4998;-4998;0;0;0
chr2	181888679	181922339	33661	*	11.84	12.02	11.63	0.4	1.43e-17	8.53e-16	4181.43	4148.46	3120	3200.36	Distal Intergenic	2	181864360	181870830	6471	1	67005	uc008onw.2	24319	ENSMUSG00000038628	Polr3k	polymerase (RNA) III (DNA directed) polypeptide K	NA	NA	NA
chr10	84750183	84770499	20317	*	10.21	9.84	10.51	-0.67	1.43e-17	8.53e-16	908.69	923.08	1392	1520.88	Promoter (<=1kb)	10	84756048	84906538	150491	1	71137	uc007gkv.1	0	ENSMUSG00000020037	Rfx4	regulatory factor X, 4 (influences HLA class II expression)	uc007gkv.1	71137	0
chr19	45727535	45746320	18786	*	9.96	9.52	10.29	-0.77	1.53e-17	9.07e-16	712.02	757.3	1159	1353.51	Promoter (<=1kb)	19	45736798	45742884	6087	2	14179	uc008hrg.2	0	ENSMUSG00000025219	Fgf8	fibroblast growth factor 8	uc008hrg.2;uc008hrh.2;uc008hri.2;uc012bmo.1;uc008hrk.1;uc029tsm.1;uc008hrm.1;uc008hrn.1	14179;14179;14179;14179;18150;71232;76055;76055	0;0;0;0;3243;0;12972;36971
chr2	115841087	115884254	43168	*	10.71	10.4	10.97	-0.58	1.77e-17	1.04e-15	1359.36	1337.04	1944	2075.51	Promoter (<=1kb)	2	115861264	115872962	11699	2	17536	uc008lqs.2	0	ENSMUSG00000027210	Meis2	Meis homeobox 2	uc008lqs.2;uc008lqt.2;uc008lqu.2;uc008lqv.2;uc008lqw.2;uc008lqx.2;uc008lqy.2	17536;17536;17536;17536;17536;17536;17536	0;0;0;0;0;0;0
chr2	70429067	70514983	85917	*	11.5	11.26	11.7	-0.44	1.96e-17	1.15e-15	2468.06	2423.94	3283	3376.48	Promoter (<=1kb)	2	70474923	70477726	2804	1	64406	uc008jzg.1	0	ENSMUSG00000075304	Sp5	trans-acting transcription factor 5	uc008jzd.2;uc012bww.1;uc008jzf.2;uc008jzg.1;uc008jzh.1;uc008jzi.1;uc029txz.1	329421;329421;329421;64406;66748;66748;68986	0;0;0;0;0;0;0
chr12	18219303	18249748	30446	*	9.83	10.15	9.42	0.73	2.12e-17	1.23e-15	1179.36	1095.73	693	677.24	Distal Intergenic	12	18514510	18535254	20745	1	236366	uc007ndb.2	-264762	ENSMUSG00000073197	5730507C01Rik	RIKEN cDNA 5730507C01 gene	NA	NA	NA
chr19	37679047	37737346	58300	*	11.13	10.86	11.36	-0.51	2.3e-17	1.33e-15	1848.04	1857.93	2556	2709.94	Promoter (<=1kb)	19	37697808	37701536	3729	1	13082	uc008his.2	0	ENSMUSG00000024987	Cyp26a1	cytochrome P450, family 26, subfamily a, polypeptide 1	uc008hiq.2;uc008his.2;uc012ble.1	107371;13082;546726	0;0;0
chr8	57221897	57390714	168818	*	13.15	12.91	13.36	-0.45	2.88e-17	1.66e-15	7842.18	7554.34	10146	10848.5	Promoter (<=1kb)	8	57304414	57320859	16446	2	102636514	uc033jfq.1	0	ENSMUSG00000100510	AV026068	expressed sequence AV026068	uc033jfq.1;uc009lss.2;uc057alk.1	102636514;15111;75996	0;0;0
chr7	98823669	98852804	29136	*	10.22	9.86	10.5	-0.65	2.99e-17	1.72e-15	937.35	918.17	1412	1490.71	Promoter (<=1kb)	7	98835112	98854747	19636	1	22411	uc009ikv.3	0	ENSMUSG00000015957	Wnt11	wingless-type MMTV integration site family, member 11	uc009ikv.3;uc009ikw.3;uc009ikx.2;uc012fpu.1	22411;22411;22411;22411	0;0;0;0
chr11	95135981	95152826	16846	*	9.88	9.44	10.22	-0.78	3.02e-17	1.73e-15	697.35	691.57	1096	1296.1	Promoter (<=1kb)	11	95140447	95145801	5355	2	13394	uc007kzz.2	0	ENSMUSG00000020871	Dlx4	distal-less homeobox 4	uc007kzz.2;uc007laa.2;uc007lab.1	13394;13394;320453	0;0;0
chr11	11970220	12093331	123112	*	12.43	12.24	12.59	-0.35	3.06e-17	1.73e-15	4962.78	4719.38	6042	6275.19	Promoter (<=1kb)	11	11930499	12027971	97473	2	14783	uc007iaz.2	0	ENSMUSG00000020176	Grb10	growth factor receptor bound protein 10	uc007iaz.2;uc007iba.2;uc007ibb.2;uc007ibc.1	14783;14783;14783;14783	0;0;0;0
chr7	70314355	70382913	68559	*	11.96	11.49	12.31	-0.82	3.09e-17	1.74e-15	2997.4	2755.5	4804	5369.28	Promoter (<=1kb)	7	70351950	70360593	8644	2	11819	uc009hni.1	0	ENSMUSG00000030551	Nr2f2	nuclear receptor subfamily 2, group F, member 2	uc009hni.1;uc009hnj.1;uc009hnk.2;uc009hnl.2;uc057ahu.1;uc009hnh.2	11819;11819;434198;434198;624549;624549	0;0;0;0;0;0
chr15	99083209	99102564	19356	*	9.91	9.47	10.25	-0.78	3.29e-17	1.85e-15	717.35	703.35	1117	1315.56	Promoter (<=1kb)	15	99084754	99087728	2975	2	239659	uc007xot.1	0	ENSMUSG00000001076	C1ql4	complement component 1, q subcomponent-like 4	uc033gwn.1;uc007xot.1;uc007xou.2;uc007xor.2;uc007xos.2	102465579;239659;72778;78733;78733	2404;0;0;0;0
chr7	24931297	24959925	28629	*	10.11	9.74	10.4	-0.66	4.35e-17	2.43e-15	876.69	836.75	1331	1376.86	Distal Intergenic	7	24923803	24926592	2790	1	16801	uc009frb.2	7494	ENSMUSG00000040940	Arhgef1	Rho guanine nucleotide exchange factor (GEF) 1	uc009fqv.3;uc009fqw.3;uc009fqx.3;uc009fqy.3;uc009fqz.3;uc009frb.2	16801;16801;16801;16801;16801;16801	28311;28311;28311;28311;26951;7494
chr13	40693531	40773521	79991	*	11.98	11.62	12.27	-0.66	4.62e-17	2.57e-15	3200.07	3085.1	4687	5219.43	Promoter (<=1kb)	13	40727808	40735162	7355	1	102633805	uc007qek.1	0	ENSMUSG00000097752	Gm26688	predicted gene, 26688	uc007qek.1;uc007qed.3;uc007qee.3;uc007qef.3;uc007qej.3;uc056ytm.1;uc007qeh.1;uc007qei.1;uc011yyq.1	102633805;21418;21418;21418;21418;21418;21418;21418;21418	0;0;0;0;0;0;0;0;0
chr11	96145900	96415124	269225	*	13.96	13.53	14.29	-0.76	4.67e-17	2.58e-15	12030.3	11680.2	18851	21329.2	Promoter (<=1kb)	11	96351632	96354016	2385	1	103889	uc007lby.2	0	ENSMUSG00000075588	Hoxb2	homeobox B2	uc007lby.2;uc007lbz.2;uc007lbk.1;uc007lbw.1;uc007lbx.1;uc007lbv.2;uc007lbu.2;uc007lbt.1;uc007lbr.1;uc007lbp.1;uc007lbq.1;uc007lbn.2;uc007lbo.2;uc007lbm.2;uc029rnt.1;uc011ydd.1;uc011yde.2;uc033fzl.1;uc011ydf.1;uc007lbl.2;uc011ydg.1;uc007lbs.2	103889;15407;15408;15410;15410;15412;15413;15414;15415;15416;15416;15417;15417;193022;193022;237930;237930;237930;387191;432593;723893;75395	0;0;0;0;0;0;0;0;0;0;0;0;0;0;0;0;0;0;0;0;0;0
chr14	104438995	104489430	50436	*	11.01	10.71	11.25	-0.54	4.83e-17	2.66e-15	1674.04	1682.34	2332	2539.66	Promoter (<=1kb)	14	104462320	104467999	5680	2	18996	uc007uxb.3	0	ENSMUSG00000048349	Pou4f1	POU domain, class 4, transcription factor 1	uc007uxb.3;uc007uxc.1	18996;72486	0;0
chr7	62336164	62501209	165046	*	12.53	12.35	12.69	-0.35	5.61e-17	3.07e-15	5239.45	5172.58	6369	6860.97	Promoter (<=1kb)	7	62348277	62349928	1652	1	17984	uc009hff.2	0	ENSMUSG00000033585	Ndn	necdin	uc009hff.2;uc009hfi.1;uc009hfh.2;uc009hfj.1	17984;22652;27385;27412	0;0;0;0
chr5	119654901	119692063	37163	*	10.37	10.04	10.65	-0.61	5.8e-17	3.16e-15	1032.69	1067.28	1566	1642.51	Promoter (<=1kb)	5	119670862	119684724	13863	1	21386	uc008zgw.2	0	ENSMUSG00000018604	Tbx3	T-box 3	uc008zgw.2;uc008zgu.2;uc033ilr.1;uc029vnz.1	21386;21386;21386;433944	0;0;0;0
chr7	49623208	49714971	91764	*	11.61	11.37	11.81	-0.43	6.65e-17	3.61e-15	2715.4	2584.82	3540	3620.71	Promoter (<=1kb)	7	49631499	49636835	5337	2	13172	uc009hbn.1	0	ENSMUSG00000030507	Dbx1	developing brain homeobox 1	uc009hbn.1	13172	0
chr9	89847461	89920479	73019	*	11.26	10.99	11.49	-0.5	6.82e-17	3.68e-15	2068.71	1992.32	2765	2987.26	Promoter (<=1kb)	9	89909775	89915847	6073	1	19417	uc009qzr.1	0	ENSMUSG00000032356	Rasgrf1	RAS protein-specific guanine nucleotide-releasing factor 1	uc009qzr.1;uc009qzs.1;uc009qzt.1;uc009qzq.1	19417;19417;19417;74700	0;0;0;0
chr7	78566024	78589563	23540	*	9.8	9.38	10.12	-0.75	8.75e-17	4.7e-15	679.35	650.37	1053	1179.33	Promoter (<=1kb)	7	78192114	78577838	385725	2	18213	uc009hxf.2	0	ENSMUSG00000059146	Ntrk3	neurotrophic tyrosine kinase, receptor, type 3	uc009hxf.2;uc029wmd.1;uc009hxh.3;uc009hxi.2;uc012fnd.1;uc009hxj.1	18213;18213;18213;18213;414121;414121	0;0;0;0;0;0
chr7	105756900	105806753	49854	*	10.76	10.42	11.03	-0.61	1.2e-16	6.4e-15	1399.37	1346.85	1960	2224.39	Promoter (<=1kb)	7	105752989	105787550	34562	2	233651	uc009izh.2	0	ENSMUSG00000036862	Dchs1	dachsous cadherin related 1	uc009izg.3;uc012frq.3;uc009izh.2;uc009izk.2;uc009izl.1;uc009izm.1	12751;12751;233651;233651;27397;27397	-4665;-4665;0;0;0;4334
chr11	53450164	53498896	48733	*	10.92	10.63	11.16	-0.53	1.25e-16	6.63e-15	1565.37	1597.98	2210	2354.78	Promoter (<=1kb)	11	53476578	53480195	3618	2	237761	uc007iwf.1	0	ENSMUSG00000044352	Sowaha	sosondowah ankyrin repeat domain family member A	uc007iwf.1;uc007iwb.1;uc007iwe.1;uc007iwc.2;uc007iwd.2	237761;71774;71774;71774;71774	0;0;0;0;0
chr7	12010290	12023729	13440	*	9.12	9.49	8.6	0.89	1.38e-16	7.29e-15	742.02	698.44	371	407.71	Distal Intergenic	7	12041299	12042219	921	1	628946	uc012eyx.1	-17570	ENSMUSG00000095864	Vmn1r77	vomeronasal 1 receptor 77	NA	NA	NA
chr2	104406298	104418031	11734	*	9.09	8.56	9.47	-0.91	1.64e-16	8.66e-15	372.68	384.53	661	760.92	Promoter (<=1kb)	2	104143073	104410334	267262	2	241589	uc008ljr.2	0	ENSMUSG00000068373	D430041D05Rik	RIKEN cDNA D430041D05 gene	uc008ljr.2	241589	0
chr10	120462757	120484164	21408	*	9.78	9.38	10.09	-0.7	1.7e-16	8.89e-15	678.68	658.22	1107	1071.33	Promoter (<=1kb)	10	120361275	120476935	115661	2	15364	uc007hfb.1	0	ENSMUSG00000056758	Hmga2	high mobility group AT-hook 2	uc007hfb.1;uc011xow.1	15364;15364	0;0
chr19	24886144	24910851	24708	*	10.15	9.79	10.44	-0.65	1.86e-16	9.7e-15	868.69	906.4	1343	1435.25	Promoter (<=1kb)	19	24898965	24901309	2345	2	14237	uc008hav.1	0	ENSMUSG00000051490	Foxd4	forkhead box D4	uc008hav.1	14237	0
chrY	90819507	90828907	9401	*	6.95	7.61	5.68	1.93	1.98e-16	1.03e-14	196.67	195.21	57	45.73	Distal Intergenic	21	90785590	90816465	30876	1	170942	uc029yhf.1	33917	ENSMUSG00000096768	Erdr1	erythroid differentiation regulator 1	uc029yhc.1;uc029yhe.1;uc029yhf.1	170942;170942;170942	0;0;0
chr4	147381637	147587494	205858	*	13.98	14.08	13.86	0.21	2.08e-16	1.07e-14	17479.1	17134.3	15064	14766	Promoter (<=1kb)	4	147500686	147513420	12735	1	195531	uc057lky.1	0	ENSMUSG00000078496	Zfp982	zinc finger protein 982	uc008vsu.3;uc029vau.1;uc057lky.1;uc008vsy.2	195531;195531;195531;433804	0;0;0;0
chr6	48423989	48449398	25410	*	9.99	9.62	10.29	-0.67	2.21e-16	1.13e-14	800.02	776.92	1217	1287.34	Promoter (<=1kb)	6	48448229	48501250	53022	1	243369	uc029vvf.1	0	ENSMUSG00000029797	Sspo	SCO-spondin	uc029vvf.1;uc009bue.1;uc012eld.1;uc009buf.1;uc009bug.1;uc009buh.1;uc009bui.1;uc009buj.1;uc009bty.2;uc009btz.2;uc009bua.2;uc009bub.2;uc009buc.2;uc057lpy.1;uc009bud.2	243369;68910;68910;68910;68910;68910;68910;68910;77827;77827;77827;77827;77827;77827;77827	0;0;0;0;0;0;0;0;28403;28403;28403;28403;21795;21105;10653
chr7	140038387	140085940	47554	*	10.95	10.65	11.21	-0.56	2.34e-16	1.2e-14	1576.04	1634.27	2233	2494.9	Promoter (<=1kb)	7	140046157	140048999	2843	2	17703	uc057lvs.1	0	ENSMUSG00000025469	Msx3	msh homeobox 3	uc057lvs.1;uc012fwf.1;uc012fwg.1;uc009kgr.1;uc009kgs.2;uc009kgo.2;uc012fwe.1;uc009kgp.2;uc009kgl.2;uc012fwd.1;uc009kgm.3;uc009kgn.2	17703;17703;68566;68566;68566;69752;69752;69752;74237;74237;74237;74237	0;0;0;0;0;0;0;0;0;0;0;0
chr16	18603798	18640509	36712	*	10.55	10.22	10.82	-0.6	2.69e-16	1.37e-14	1181.36	1203.63	1717	1891.61	Promoter (<=1kb)	16	18620319	18622403	2085	2	14724	uc007yoi.1	0	ENSMUSG00000050761	Gp1bb	glycoprotein Ib, beta polypeptide	uc007yoi.1;uc012aci.1;uc007yoj.1;uc012acj.1;uc012ack.1	14724;14724;18951;18951;18951	0;0;0;0;0
chr4	109648788	109668880	20093	*	10.32	9.97	10.61	-0.64	2.74e-16	1.39e-14	1028.69	973.11	1486	1639.59	Promoter (<=1kb)	4	109660876	109665372	4497	2	12580	uc008ucr.1	0	ENSMUSG00000028551	Cdkn2c	cyclin dependent kinase inhibitor 2C	uc008ucr.1;uc008ucs.2	12580;12580	0;0
chr5	41726780	41770539	43760	*	10.81	10.48	11.07	-0.59	3.03e-16	1.53e-14	1436.03	1419.44	2012	2298.34	Promoter (<=1kb)	5	41761448	41764220	2773	2	12020	uc008xhc.1	0	ENSMUSG00000049691	Nkx3-2	NK3 homeobox 2	uc008xhc.1	12020	0
chr2	33509740	33662927	153188	*	12.71	12.39	12.97	-0.58	3.12e-16	1.57e-14	5396.12	5350.13	7615	8426.6	Promoter (<=1kb)	2	33641193	33645663	4471	1	100504399	uc008jhz.1	0	NA	C130021I20Rik	Riken cDNA C130021I20 gene	uc008jhz.1;uc008jia.1;uc008jhy.2	100504399;100504399;16917	0;0;0
chr11	103767255	103821853	54599	*	11.23	10.96	11.45	-0.49	3.64e-16	1.82e-14	1976.71	2009.98	2687	2912.33	Promoter (<=1kb)	11	103774175	103818021	43847	1	22415	uc007lvs.2	0	ENSMUSG00000000125	Wnt3	wingless-type MMTV integration site family, member 3	uc007lvt.2;uc007lvs.2	18195;22415	0;0
chr12	111401375	111431737	30363	*	10.26	9.92	10.53	-0.61	4.21e-16	2.09e-14	966.69	975.07	1454	1499.47	Promoter (<=1kb)	12	111406809	111412077	5269	1	380787	uc007pcu.1	0	ENSMUSG00000087075	Lbhd2	LBH domain containing 2	uc007pcu.1;uc007pcw.2;uc007pcx.3;uc033gfj.1;uc007pcv.2;uc033gfk.1;uc011yuw.2	380787;74190;74190;74190;74190;74190;74190	0;0;0;0;0;0;0
chr3	154320014	154347414	27401	*	10.2	9.85	10.48	-0.63	4.21e-16	2.09e-14	930.69	921.12	1384	1473.2	Promoter (<=1kb)	3	154306293	154330560	24268	2	16875	uc008rum.2	0	ENSMUSG00000096225	Lhx8	LIM homeobox protein 8	uc008rum.2;uc008run.1	16875;99686	0;0
chr11	85870339	85903603	33265	*	10.5	10.17	10.77	-0.6	4.37e-16	2.16e-14	1196.03	1109.46	1692	1807.92	Promoter (<=1kb)	11	85890063	85916097	26035	1	21387	uc007ksc.2	0	ENSMUSG00000000094	Tbx4	T-box 4	uc007ksc.2;uc007ksd.2	21387;21387	0;0
chr11	18993386	19034467	41082	*	10.92	10.59	11.18	-0.59	4.73e-16	2.32e-14	1527.37	1563.64	2156	2485.17	Promoter (<=1kb)	11	18880428	19018969	138542	2	17268	uc007icl.2	0	ENSMUSG00000020160	Meis1	Meis homeobox 1	uc007icl.2;uc007icm.2;uc007icn.2;uc007ico.2	17268;17268;17268;17268	0;0;0;0
chr2	57085121	57132717	47597	*	10.98	10.68	11.23	-0.55	4.75e-16	2.32e-14	1639.37	1649.97	2268	2549.39	Promoter (<=1kb)	2	57107226	57115038	7813	2	18227	uc008jrw.2	0	ENSMUSG00000026826	Nr4a2	nuclear receptor subfamily 4, group A, member 2	uc008jrw.2;uc012bvn.1;uc008jrx.2;uc008jry.2;uc029txk.1	18227;18227;18227;18227;767815	0;0;0;0;0
chr2	36088353	36121007	32655	*	10.55	10.22	10.83	-0.61	4.78e-16	2.33e-14	1213.36	1168.32	1715	1914.96	Promoter (<=1kb)	2	36081953	36104060	22108	2	16874	uc008jld.1	0	ENSMUSG00000026890	Lhx6	LIM homeobox protein 6	uc008jld.1;uc008jle.1;uc008jlf.1;uc008jlg.1;uc008jlh.2;uc008jli.2;uc012bun.1;uc012buo.1	16874;16874;16874;16874;67889;67889;67889;67889	0;0;0;0;0;0;0;0
chr5	67202191	67253155	50965	*	10.87	10.59	11.1	-0.52	5.06e-16	2.45e-14	1562.04	1513.61	2159	2244.82	Distal Intergenic	5	67260565	67264609	4045	1	67878	uc008xpo.2	-7410	ENSMUSG00000037720	Tmem33	transmembrane protein 33	NA	NA	NA
chr1	163302149	163324030	21882	*	9.94	9.55	10.24	-0.7	5.16e-16	2.49e-14	750.02	745.53	1144	1277.61	Promoter (<=1kb)	1	163245119	163313650	68532	2	18933	uc007dhh.1	0	ENSMUSG00000026586	Prrx1	paired related homeobox 1	uc007dhh.1;uc007dhi.1;uc007dhk.1	18933;18933;18933	0;0;0
chr18	36804375	36856980	52606	*	10.33	10.61	9.99	0.62	6.45e-16	3.1e-14	1638.04	1493.01	1031	1001.27	Promoter (2-3kb)	18	36801763	36802107	345	1	378472	uc012bbu.1	2612	NA	Vaultrc5	vault RNA component 5	uc012bbu.1;uc008eos.1	378472;66492	2612;10452
chr18	80972861	81005403	32543	*	10.35	9.99	10.63	-0.65	7.23e-16	3.46e-14	987.36	1042.76	1490	1687.27	Promoter (<=1kb)	18	80966359	80974625	8267	2	20689	uc008ftl.3	0	ENSMUSG00000024565	Sall3	spalt like transcription factor 3	uc008ftl.3;uc008ftm.2;uc008ftn.2	20689;20689;20689	0;0;0
chr11	44609384	44632653	23270	*	10.04	9.68	10.33	-0.65	8.25e-16	3.93e-14	818.02	822.04	1238	1339.89	Promoter (<=1kb)	11	44618100	44646820	28721	1	13591	uc007inj.2	0	ENSMUSG00000057098	Ebf1	early B cell factor 1	uc007inj.2;uc007ink.2;uc007inl.2;uc007inm.2;uc007inn.2	13591;13591;13591;13591;13591	0;0;0;0;0
chr2	109652978	109704604	51627	*	10.86	10.58	11.1	-0.52	8.55e-16	4.05e-14	1546.04	1510.67	2132	2244.82	Promoter (<=1kb)	2	109674700	109727043	52344	1	12064	uc008lmd.1	0	ENSMUSG00000048482	Bdnf	brain derived neurotrophic factor	uc008lmd.1;uc008lme.1;uc008lmf.1;uc008lmg.1;uc008lmh.1;uc008lmi.1;uc008lmj.1;uc008lmk.1;uc008lml.1;uc008lmm.1;uc008lmn.2	12064;12064;12064;12064;12064;12064;12064;12064;12064;12064;12064	0;0;0;0;0;0;0;0;0;0;-4779
chr16	98051885	98107047	55163	*	10.61	10.87	10.3	0.57	8.85e-16	4.18e-14	1936.71	1809.86	1297	1224.1	Promoter (<=1kb)	16	98001310	98081992	80683	2	320586	uc008aea.1	0	ENSMUSG00000116673	A630089N07Rik	RIKEN cDNA A630089N07 gene	uc008aea.1;uc008aeb.1;uc012ajd.1;uc008aec.2	320586;320586;320586;320586	0;0;0;0
chr13	71950144	71975771	25628	*	10.14	9.78	10.43	-0.65	8.97e-16	4.21e-14	896.02	866.18	1317	1442.06	Promoter (<=1kb)	13	71958232	71963723	5492	2	16371	uc007rdd.1	0	ENSMUSG00000060969	Irx1	Iroquois homeobox 1	uc007rdd.1	16371	0
chr4	126729562	126741191	11630	*	9.36	8.91	9.71	-0.8	1.01e-15	4.73e-14	468.68	492.44	794	876.72	Promoter (<=1kb)	4	126716003	126736269	20267	2	332937	uc008uts.1	0	ENSMUSG00000042477	Tfap2e	transcription factor AP-2, epsilon	uc008utu.2;uc008utt.2;uc008uts.1	26562;26562;332937	12236;12238;0
chr19	6492615	6506931	14317	*	9.07	8.59	9.43	-0.85	1.37e-15	6.39e-14	376.01	392.38	672	708.38	Promoter (<=1kb)	19	6497835	6544169	46335	1	18190	uc008giy.1	0	ENSMUSG00000033768	Nrxn2	neurexin II	uc008giu.2;uc008giv.2;uc012bhm.2;uc008giy.1	18190;18190;18190;18190	0;0;0;0
chr7	137299030	137331931	32902	*	10.95	10.41	11.34	-0.93	1.39e-15	6.43e-14	1368.03	1355.68	2383	2790.7	Promoter (<=1kb)	7	137193671	137314445	120775	2	13593	uc009ker.2	0	ENSMUSG00000010476	Ebf3	early B cell factor 3	uc009ker.2;uc009kes.2;uc012fvm.1	13593;13593;13593	0;0;0
chr15	85570451	85585769	15319	*	9.56	9.13	9.89	-0.75	1.74e-15	8.05e-14	537.35	583.67	902	989.59	Promoter (<=1kb)	15	85581142	85593708	12567	1	105975	uc007xdh.1	0	ENSMUSG00000097209	AU022754	expressed sequence AU022754	uc007xdh.1;uc007xde.2;uc011zxl.1;uc007xdf.2;uc007xdg.2	105975;22422;22422;22422;22422	0;0;0;0;0
chr8	69866362	69893665	27304	*	10.55	10.23	10.81	-0.58	1.89e-15	8.71e-14	1190.03	1214.42	1710	1881.88	Promoter (<=1kb)	8	69887788	69890885	3098	2	234365	uc009lyc.1	0	ENSMUSG00000048967	Yjefn3	YjeF N-terminal domain containing 3	uc009lyc.1;uc009lyd.2;uc009lyb.2;uc009lxx.1;uc009lxy.1;uc009lxz.1;uc009lya.1	234365;67184;68709;80720;80720;80720;80720	0;0;0;0;0;0;0
chr15	93501037	93547085	46049	*	11.04	10.76	11.27	-0.52	1.96e-15	8.97e-14	1745.37	1712.75	2353	2596.09	Promoter (<=1kb)	15	93499114	93519436	20323	2	106042	uc007xja.1	0	ENSMUSG00000036158	Prickle1	prickle planar cell polarity protein 1	uc007xja.1;uc007xjb.1;uc007xjc.2;uc007xjd.1	106042;106042;106042;106042	0;0;0;0
chr17	44720370	44759699	39330	*	10.38	10.05	10.64	-0.59	1.99e-15	9.07e-14	1054.02	1067.28	1535	1664.89	Promoter (<=1kb)	17	44603989	44736648	132660	2	12393	uc008cpy.3	0	ENSMUSG00000039153	Runx2	runt related transcription factor 2	uc008cpy.3;uc008cpz.3;uc012aty.2;uc008cqa.3;uc008cqi.3;uc008cqb.3;uc008cqc.3;uc008cqd.2	12393;12393;12393;12393;12393;12393;12393;12393	0;0;0;0;0;0;0;0
chr13	51830263	51869958	39696	*	10.63	10.32	10.88	-0.56	2.03e-15	9.22e-14	1295.36	1265.43	1811	1958.75	Promoter (<=1kb)	13	51846675	51848475	1801	1	23882	uc007qmq.3	0	ENSMUSG00000021453	Gadd45g	growth arrest and DNA-damage-inducible 45 gamma	uc007qmq.3	23882	0
chr15	97995815	98015854	20040	*	9.98	9.59	10.29	-0.7	2.17e-15	9.8e-14	745.35	791.63	1163	1339.89	Promoter (<=1kb)	15	97975602	98004724	29123	2	12824	uc007xlp.2	0	ENSMUSG00000022483	Col2a1	collagen, type II, alpha 1	uc007xlp.2;uc007xlq.2	12824;12824	0;0
chr2	146211197	146241304	30108	*	10.41	10.08	10.68	-0.6	2.26e-15	1.02e-13	1058.02	1109.46	1567	1711.59	Promoter (<=1kb)	2	146221997	146225020	3024	1	53626	uc008msh.3	0	ENSMUSG00000068154	Insm1	insulinoma-associated 1	uc008msi.3;uc008msj.3;uc008msh.3	241694;241694;53626	0;0;0
chr9	32661971	32705758	43788	*	10.64	10.34	10.89	-0.55	2.54e-15	1.14e-13	1285.36	1301.73	1821	1976.26	Promoter (<=1kb)	9	32696042	32757820	61779	1	23871	uc009osb.1	0	ENSMUSG00000032035	Ets1	E26 avian leukemia oncogene 1, 5' domain	uc009osa.1;uc009osb.1;uc009osc.1	23871;23871;23871	0;0;0
chr12	53230931	53268817	37887	*	10.58	10.24	10.85	-0.61	2.59e-15	1.16e-13	1270.03	1153.6	1756	1930.53	Promoter (<=1kb)	12	53248677	54072175	823499	1	27386	uc007nno.1	0	ENSMUSG00000021010	Npas3	neuronal PAS domain protein 3	uc007nno.1;uc007nnp.1;uc033gdn.1	27386;27386;27386	0;0;0
chr7	26687734	26716084	28351	*	9.75	10.05	9.37	0.69	2.79e-15	1.24e-13	1088.69	1035.89	667	653.89	Promoter (1-2kb)	7	26665227	26686430	21204	2	243881	uc009fur.1	-1304	ENSMUSG00000040650	Cyp2b23	cytochrome P450, family 2, subfamily b, polypeptide 23	uc009fur.1	243881	-1304
chr13	21976359	22021599	45241	*	10.83	10.54	11.08	-0.54	3.71e-15	1.64e-13	1465.37	1511.65	2056	2263.31	Promoter (<=1kb)	13	21981181	21985907	4727	1	195236	uc011ywx.2	0	ENSMUSG00000016982	Pom121l2	POM121 membrane glycoprotein-like 2 (rat)	uc011ywx.2;uc011ywy.1;uc007prz.1	195236;195236;54373	0;0;0
chr1	191176570	191199831	23262	*	9.87	9.5	10.16	-0.67	4.26e-15	1.88e-13	733.35	712.17	1105	1189.07	Promoter (<=1kb)	1	191170296	191183333	13038	2	11910	uc007ece.2	0	ENSMUSG00000026628	Atf3	activating transcription factor 3	uc007ece.2;uc011wys.2;uc011wyt.2	11910;11910;11910	0;0;0
chr2	38325713	38381459	55747	*	11.61	11.16	11.95	-0.79	4.38e-15	1.92e-13	2275.39	2302.3	3668	4238.6	Promoter (<=1kb)	2	38339281	38369737	30457	1	16870	uc008jnk.2	0	ENSMUSG00000000247	Lhx2	LIM homeobox protein 2	uc008jnk.2;uc008jnl.2	16870;16870	0;0
chr7	73344062	73413809	69748	*	11.46	11.22	11.66	-0.44	4.39e-15	1.92e-13	2416.72	2357.24	3122	3347.29	Promoter (<=1kb)	7	73375520	73419899	44380	1	244058	uc009hqz.2	0	ENSMUSG00000070509	Rgma	repulsive guidance molecule family member A	uc009hqz.2;uc009hra.2;uc009hrb.2;uc009hqy.2;uc029wjt.1	244058;244058;244058;319783;319783	0;0;0;0;0
chr1	155721923	155755026	33104	*	10.89	10.4	11.26	-0.87	4.42e-15	1.93e-13	1343.36	1349.79	2270	2638.91	Promoter (<=1kb)	1	155701692	155742027	40336	2	16872	uc007dbn.3	0	ENSMUSG00000026468	Lhx4	LIM homeobox protein 4	uc007dbn.3	16872	0
chr6	8230807	8257780	26974	*	9.53	9.85	9.11	0.74	6.11e-15	2.65e-13	960.02	886.78	568	540.04	3' UTR	6	8209227	8236274	27048	1	252875	uc009axk.3	21580	ENSMUSG00000042447	Mios	meiosis regulator for oocyte development	uc009axm.3;uc057ach.2;uc012eia.1;uc009axn.3;uc009axk.3;uc009axl.2	100036521;100036521;100036521;170772;252875;68240	-1508;-1508;-1508;0;0;0
chr15	76512721	76526271	13551	*	9.42	9.01	9.75	-0.74	6.65e-15	2.88e-13	524.68	503.23	846	870.88	Promoter (<=1kb)	15	76516203	76522129	5927	2	170729	uc007wko.1	0	ENSMUSG00000048385	Scrt1	scratch family zinc finger 1	uc007wkn.1;uc007wko.1	13350;170729	-903;0
chr11	85823906	85859564	35659	*	10.87	10.36	11.24	-0.89	6.77e-15	2.91e-13	1345.36	1275.24	2248	2602.91	Promoter (<=1kb)	11	85832615	85841948	9334	1	21385	uc007ksb.1	0	ENSMUSG00000000093	Tbx2	T-box 2	uc007krq.2;uc007krr.2;uc007krs.2;uc007krt.3;uc007kru.2;uc007ksa.3;uc007ksb.1;uc007krx.2;uc007kry.2	192197;192197;192197;192197;192197;192197;21385;69909;69909	0;0;0;0;0;0;0;0;0
chr2	94221500	94287480	65981	*	11.2	10.94	11.42	-0.48	6.81e-15	2.92e-13	1974.05	1947.2	2611	2856.87	Promoter (<=1kb)	2	94241378	94241442	65	1	102465777	uc033hos.1	0	ENSMUSG00000106336	Mir129b	microRNA 129b	uc033hos.1;uc012bzz.1;uc012caa.1	102465777;723953;735259	0;0;0
chr2	38696319	38725818	29500	*	10	9.63	10.29	-0.66	6.95e-15	2.97e-13	796.02	793.59	1184	1319.45	Promoter (<=1kb)	2	38692656	38712234	19579	2	26423	uc008jnr.2	0	ENSMUSG00000026751	Nr5a1	nuclear receptor subfamily 5, group A, member 1	uc012bus.1;uc012but.1;uc012buu.1;uc008jnr.2;uc008jns.2;uc008jnt.1	14536;14536;14536;26423;26423;26423	0;0;0;0;0;0
chr2	36193487	36218907	25421	*	10.13	9.77	10.43	-0.66	7.9e-15	3.36e-13	888.02	857.36	1284	1467.36	Exon (uc008jlk.2/uc008jlk.2, exon 1 of 5)	2	36230426	36252272	21847	1	19224	uc008jll.3	-11519	ENSMUSG00000047250	Ptgs1	prostaglandin-endoperoxide synthase 1	uc008jlj.3	67871	57089
chr2	131539046	131571855	32810	*	10.2	9.87	10.46	-0.59	8.07e-15	3.42e-13	948.02	923.08	1385	1434.27	Promoter (<=1kb)	2	131545357	131562285	16929	2	11550	uc008mlu.1	0	ENSMUSG00000027335	Adra1d	adrenergic receptor, alpha 1d	uc008mlu.1	11550	0
chr19	4667815	4722876	55062	*	10.97	10.7	11.2	-0.5	8.37e-15	3.54e-13	1674.04	1653.89	2257	2446.24	Promoter (<=1kb)	19	4711223	4752352	41130	1	20743	uc008gan.1	0	ENSMUSG00000067889	Sptbn2	spectrin beta, non-erythrocytic 2	uc008gan.1;uc008gao.1;uc033hik.1;uc008gam.2	20743;20743;381196;381196	0;0;0;0
chr12	108302578	108339741	37164	*	10.45	10.14	10.7	-0.56	8.45e-15	3.55e-13	1114.69	1144.77	1617	1708.67	Promoter (<=1kb)	12	108334381	108362234	27854	1	13116	uc007ozo.1	0	ENSMUSG00000021259	Cyp46a1	cytochrome P450, family 46, subfamily a, polypeptide 1	uc007ozo.1;uc007ozn.1	13116;214305	0;0
chr9	40846025	40891865	45841	*	10.85	10.56	11.08	-0.53	9.92e-15	4.16e-13	1543.37	1472.41	2079	2264.28	Promoter (<=1kb)	9	40874127	40877972	3846	1	244813	uc009paa.1	0	ENSMUSG00000054360	Bsx	brain specific homeobox	uc009paa.1;uc009pab.1;uc009pac.1	244813;70989;70989	0;5753;0
chr11	59278331	59309728	31398	*	10.23	9.91	10.5	-0.59	1.02e-14	4.27e-13	969.36	950.55	1402	1488.76	Promoter (<=1kb)	11	59306930	59333552	26623	1	216795	uc007jdq.1	0	ENSMUSG00000000126	Wnt9a	wingless-type MMTV integration site family, member 9A	uc007jdq.1;uc011xvn.1;uc007jdp.3	216795;216795;22416	0;0;0
chr9	31891504	31931624	40121	*	10.56	10.26	10.81	-0.55	1.11e-14	4.62e-13	1270.03	1184.01	1760	1839.06	Promoter (<=1kb)	9	31846044	31913285	67242	2	12023	uc009oru.1	0	ENSMUSG00000032033	Barx2	BarH-like homeobox 2	uc009oru.1	12023	0
chr13	107881864	107898143	16280	*	9.39	8.97	9.72	-0.75	1.11e-14	4.62e-13	477.34	523.83	821	867.96	Promoter (<=1kb)	13	107724617	107890064	165448	2	67263	uc007rup.2	0	ENSMUSG00000032846	Zswim6	zinc finger SWIM-type containing 6	uc007rup.2;uc007ruq.2	67263;67263	0;0
chr19	43372180	43474900	102721	*	11.69	11.48	11.87	-0.38	1.25e-14	5.18e-13	2900.07	2831.04	3677	3796.84	Promoter (<=1kb)	19	42788595	43388355	599761	2	545291	uc008hoe.2	0	ENSMUSG00000074852	Hpse2	heparanase 2	uc008hoe.2;uc008hoh.2;uc012bma.1	545291;83674;83674	0;0;0
chr7	142615222	142672045	56824	*	10.93	10.67	11.15	-0.48	1.49e-14	6.13e-13	1656.7	1608.77	2246	2301.26	Promoter (<=1kb)	7	142659693	142670356	10664	1	111975	uc009koe.1	0	ENSMUSG00000086266	Igf2os	insulin-like growth factor 2, opposite strand	uc009koe.1;uc009kod.3;uc057cbj.1;uc012fxo.1;uc012fxp.2;uc057cbk.1;uc012fxq.1	111975;16002;16002;16002;16002;16002;723874	0;0;0;0;0;0;0
chr2	146819671	146853790	34120	*	10.25	9.94	10.51	-0.57	1.55e-14	6.36e-13	994.02	970.16	1447	1474.17	Promoter (2-3kb)	2	146855889	146970089	114201	1	228730	uc008mso.1	-2099	ENSMUSG00000074749	Kiz	kizuna centrosomal protein	uc008mso.1	228730	0
chr2	122286248	122321016	34769	*	10.52	10.21	10.77	-0.56	1.68e-14	6.87e-13	1184.69	1183.03	1665	1828.36	Promoter (<=1kb)	2	122303549	122313730	10182	2	213696	uc008mao.1	0	ENSMUSG00000027224	Duoxa1	dual oxidase maturation factor 1	uc008mao.1;uc008mak.1;uc012ccx.1;uc008mal.1;uc008mam.1;uc008map.1	213696;214593;214593;214593;66811;99439	0;0;0;-679;0;0
chr16	8548295	8560441	12147	*	8.66	9.05	8.1	0.95	1.87e-14	7.6e-13	558.01	505.19	283	267.59	Intron (uc007ycm.2/268860, intron 1 of 2)	16	8513429	8580942	67514	1	268860	uc007ycm.2	34866	ENSMUSG00000057880	Abat	4-aminobutyrate aminotransferase	uc007ycm.2;uc007ycn.2;uc007yco.3;uc007ycp.3	268860;268860;268860;268860	0;0;0;0
chr18	82843946	82929384	85439	*	11.41	11.16	11.62	-0.46	1.93e-14	7.83e-13	2338.05	2222.85	2993	3294.74	Promoter (<=1kb)	18	82910879	83005314	94436	1	329003	uc008fuf.2	0	ENSMUSG00000058881	Zfp516	zinc finger protein 516	uc008fuf.2;uc008fug.2;uc008fuc.2;uc057lab.1;uc008fud.2;uc008fue.2	329003;329003;73985;73985;75853;75853	0;0;0;0;0;0
chr9	122557970	122581703	23734	*	9.86	9.49	10.16	-0.67	1.95e-14	7.87e-13	692.02	744.55	1086	1206.58	Promoter (<=1kb)	9	122572501	122580647	8147	1	319626	uc009sfa.2	0	ENSMUSG00000097736	9530059O14Rik	RIKEN cDNA 9530059O14 gene	uc009sfa.2;uc009sfb.2;uc012hcw.1	319626;319626;319626	0;0;0
chr4	11379499	11406880	27382	*	10.25	9.92	10.52	-0.6	2.08e-14	8.38e-13	995.36	946.62	1409	1534.5	Promoter (<=1kb)	4	11331933	11384462	52530	2	207920	uc008rzl.3	0	ENSMUSG00000040728	Esrp1	epithelial splicing regulatory protein 1	uc008rzl.3;uc008rzk.4;uc008rzm.3;uc012dao.2;uc008rzn.1	207920;207920;207920;207920;207920	0;0;0;0;0
chr6	51141690	51190506	48817	*	10.86	10.57	11.11	-0.53	2.59e-14	1.04e-12	1605.37	1444.95	2148	2258.45	Distal Intergenic	6	51269812	51269910	99	2	387166	uc012elv.1	79404	ENSMUSG00000065505	Mir148a	microRNA 148a	NA	NA	NA
chr6	30939068	30975815	36748	*	10.57	10.27	10.82	-0.55	2.95e-14	1.18e-12	1261.36	1213.44	1733	1891.61	Promoter (<=1kb)	6	30956021	30958990	2970	2	619665	uc012ejp.1	0	ENSMUSG00000073209	Klf14	Kruppel-like factor 14	uc012ejp.1	619665	0
chr10	42622584	42640348	17765	*	9.66	9.25	9.98	-0.72	3.18e-14	1.27e-12	623.35	597.4	937	1078.14	Distal Intergenic	10	42678916	42699991	21076	1	14628	uc007eyu.2	-38568	ENSMUSG00000038280	Ostm1	osteopetrosis associated transmembrane protein 1	NA	NA	NA
chr2	26192561	26208152	15592	*	9.65	9.25	9.96	-0.71	3.33e-14	1.32e-12	624.68	589.55	937	1054.78	Promoter (<=1kb)	2	26200212	26202866	2655	2	16871	uc008iug.1	0	ENSMUSG00000026934	Lhx3	LIM homeobox protein 3	uc008iug.1;uc008iuh.2;uc008iui.2;uc008iuk.2;uc008iuj.2;uc008iul.2	16871;16871;16871;227638;227638;227638	0;0;0;17219;29247;29247
chr1	78159481	78228492	69012	*	11.72	11.3	12.04	-0.73	3.36e-14	1.33e-12	2597.39	2452.39	3934	4467.27	Promoter (<=1kb)	1	78101267	78197136	95870	2	18505	uc007bqb.2	0	ENSMUSG00000004872	Pax3	paired box 3	uc007bqb.2;uc007bqc.2;uc007bqd.1	18505;18505;18505	0;0;0
chr1	120333146	120356110	22965	*	9.72	9.36	10.01	-0.65	3.39e-14	1.33e-12	658.02	655.28	1020	1045.05	Promoter (<=1kb)	1	120340582	120343174	2593	1	226359	uc007cjk.1	0	ENSMUSG00000036907	C1ql2	complement component 1, q subcomponent-like 2	uc007cjk.1	226359	0
chr18	37399471	37576818	177348	*	12.71	12.55	12.85	-0.3	3.4e-14	1.33e-12	6097.47	5917.12	7130	7618.97	Promoter (<=1kb)	18	37400855	37403909	3055	1	93880	uc008epu.1	0	ENSMUSG00000051242	Pcdhb9	protocadherin beta 9	uc008eoy.3;uc056zgg.2;uc056zgh.2;uc008epu.1;uc008epv.1;uc008epw.1;uc008epx.1;uc008epy.1;uc008epz.1;uc008eqa.1;uc008eqb.2;uc008eqc.1;uc008eqd.1;uc008eqe.1;uc008eqf.3;uc012bby.2	100384868;103611158;103611159;93880;93881;93882;93883;93884;93885;93886;93887;93888;93889;93890;93891;93893	0;0;0;0;0;0;0;0;0;0;0;0;0;0;0;0
chr9	48825926	48845682	19757	*	9.71	9.31	10.02	-0.7	3.66e-14	1.43e-12	648.01	625.85	970	1104.41	Promoter (<=1kb)	9	48654297	48835945	181649	2	235320	uc009pil.1	0	ENSMUSG00000066687	Zbtb16	zinc finger and BTB domain containing 16	uc009pil.1;uc009pim.1;uc009pin.1	235320;235320;235320	0;0;0
chr5	139889568	139921017	31450	*	10.33	9.99	10.6	-0.61	3.82e-14	1.49e-12	1042.69	990.76	1456	1653.21	Promoter (<=1kb)	5	139907943	139974725	66783	1	243312	uc009ahi.3	0	ENSMUSG00000048988	Elfn1	leucine rich repeat and fibronectin type III, extracellular 1	uc009ahi.3	243312	0
chr3	95962562	96006723	44162	*	10.52	10.21	10.79	-0.58	4.04e-14	1.57e-12	1207.36	1155.57	1659	1871.17	Promoter (<=1kb)	3	95985510	95986967	1458	1	668224	uc008qlw.1	0	NA	Gm9054	predicted gene 9054	uc008qly.2;uc008qlw.1;uc008qlx.3	22365;668224;67220	0;0;0
chr4	136127334	136150706	23373	*	10.06	9.72	10.33	-0.61	4.62e-14	1.79e-12	843.35	845.58	1235	1344.75	Promoter (<=1kb)	4	136143822	136145392	1571	1	15903	uc012dnf.1	0	ENSMUSG00000007872	Id3	inhibitor of DNA binding 3	uc012dnf.1	15903	0
chr9	21975769	21996229	20461	*	9.5	9.1	9.8	-0.7	4.83e-14	1.86e-12	564.01	535.6	886	902.02	Promoter (<=1kb)	9	21971004	21989453	18450	2	71746	uc009onf.1	0	ENSMUSG00000040146	Rgl3	ral guanine nucleotide dissociation stimulator-like 3	uc009onf.1;uc009ong.2;uc012gpk.1;uc009onh.1	71746;77609;77609;77609	0;0;0;6405
chr4	154948983	154963940	14958	*	9.48	9.07	9.79	-0.72	5.05e-14	1.94e-12	535.35	539.53	841	934.13	Promoter (<=1kb)	4	154960923	154962371	1449	1	15208	uc008wck.1	0	ENSMUSG00000048001	Hes5	hes family bHLH transcription factor 5	uc008wck.1;uc008wcl.3;uc008wcm.3;uc012dqn.2	15208;269614;269614;269614	0;-183;-183;-183
chr2	22608953	22656968	48016	*	10.84	10.56	11.07	-0.5	5.57e-14	2.13e-12	1531.37	1495.96	2057	2235.09	Promoter (<=1kb)	2	22654283	22654350	68	1	100628608	uc029tvy.1	0	ENSMUSG00000106199	Mir3967	microRNA 3967	uc029tvy.1;uc008ini.1;uc008inj.1;uc008ink.1;uc029tvw.2	100628608;14417;14417;14417;667663	0;0;0;0;0
chrX	101844042	101855044	11003	*	8.48	7.9	8.89	-0.98	5.75e-14	2.19e-12	253.34	225.62	459	488.47	Promoter (<=1kb)	20	101849385	101949635	100251	1	100042480	uc009tyh.1	0	ENSMUSG00000079481	Nhsl2	NHS-like 2	uc009tyh.1;uc012hmz.1	100042480;100042480	0;0
chr7	142058784	142106097	47314	*	10.37	10.06	10.62	-0.56	5.85e-14	2.22e-12	1064.69	1076.11	1518	1630.83	Promoter (<=1kb)	7	142008553	142061034	52482	2	101513	uc009kmk.1	0	ENSMUSG00000025147	Mob2	MOB kinase activator 2	uc009kmk.1;uc009kml.1;uc009kmo.2	101513;101513;18218	0;0;0
chr4	129955779	129999506	43728	*	10.51	10.21	10.75	-0.54	6.05e-14	2.29e-12	1166.69	1204.61	1661	1787.49	Promoter (<=1kb)	4	129984870	130022633	37764	1	230775	uc008uym.3	0	ENSMUSG00000028782	Adgrb2	adhesion G protein-coupled receptor B2	uc008uym.3;uc008uyn.3;uc008uyo.3;uc008uyp.1;uc008uyl.2;uc029uzo.1	230775;230775;230775;230775;72225;72225	0;0;0;0;0;0
chr18	3113473	3125644	12172	*	8.29	8.73	7.65	1.08	6.64e-14	2.5e-12	460.68	390.42	211	190.72	Promoter (<=1kb)	18	3122492	3123412	921	2	100312476	uc008dxj.1	0	ENSMUSG00000091539	Vmn1r238	vomeronasal 1 receptor, 238	uc008dxj.1	100312476	0
chr1	87248985	87284281	35297	*	10.29	9.97	10.55	-0.58	7.43e-14	2.79e-12	990.02	1018.23	1431	1560.77	Promoter (<=1kb)	1	87264364	87310791	46428	1	98363	uc007bwo.1	0	ENSMUSG00000026255	Efhd1	EF hand domain containing 1	uc007bwo.1	98363	0
chr3	55775120	55795452	20333	*	9.93	9.56	10.23	-0.67	7.82e-14	2.93e-12	782.68	730.81	1124	1276.64	Promoter (<=1kb)	3	55782510	55785287	2778	1	17116	uc008pgv.2	0	ENSMUSG00000056947	Mab21l1	mab-21-like 1 (C. elegans)	uc008pgv.2;uc008pgt.2;uc033htl.1	17116;26422;26422	0;0;0
chr5	108353647	108382073	28427	*	10.17	9.84	10.44	-0.6	8.12e-14	3.03e-12	925.35	903.46	1317	1455.68	5' UTR	5	108388373	108431743	43371	1	18587	uc008ynz.2	-6300	ENSMUSG00000029491	Pde6b	phosphodiesterase 6B, cGMP, rod receptor, beta polypeptide	uc008ynu.2;uc008ynv.2	433931;433931	40722;40722
chr2	45056444	45122337	65894	*	10.99	10.74	11.19	-0.45	8.74e-14	3.25e-12	1714.71	1715.69	2345	2338.24	Promoter (<=1kb)	2	44983512	45110277	126766	2	24136	uc008jpc.2	0	ENSMUSG00000026872	Zeb2	zinc finger E-box binding homeobox 2	uc008jpc.2;uc008jpd.2;uc008jpe.2;uc008jpf.1;uc008jpg.1;uc008jph.1;uc008jpi.1;uc008jpj.1;uc012bvd.4;uc008jpk.3	24136;24136;24136;24136;24136;24136;24136;24136;433424;433424	0;0;0;0;0;0;0;0;0;0
chr7	132589271	132620894	31624	*	10.28	9.97	10.54	-0.57	8.83e-14	3.27e-12	1026.69	975.07	1443	1525.74	Promoter (<=1kb)	7	132596239	132599637	3399	2	20231	uc009kcc.1	0	ENSMUSG00000048528	Nkx1-2	NK1 homeobox 2	uc009kcc.1;uc009kce.1	20231;76429	0;0
chr5	98162672	98201947	39276	*	10.95	10.47	11.31	-0.84	9.36e-14	3.46e-12	1512.7	1314.48	2426	2641.83	Promoter (<=1kb)	5	98180869	98187448	6580	1	77630	uc008ygb.1	0	ENSMUSG00000035456	Prdm8	PR domain containing 8	uc008ygb.1	77630	0
chr11	63912837	63930099	17263	*	9.43	9.03	9.74	-0.71	9.68e-14	3.57e-12	502.68	544.43	839	875.74	Promoter (<=1kb)	11	63884693	63922284	37592	2	54710	uc007jkn.1	0	ENSMUSG00000070407	Hs3st3b1	heparan sulfate (glucosamine) 3-O-sulfotransferase 3B1	uc007jkn.1	54710	0
chr12	99960333	99973740	13408	*	9.38	8.96	9.71	-0.75	1.02e-13	3.73e-12	479.34	517.94	790	881.58	Promoter (<=1kb)	12	99964499	100062682	98184	1	217826	uc007osi.2	0	ENSMUSG00000045404	Kcnk13	potassium channel, subfamily K, member 13	uc007osi.2;uc007osj.2;uc007osl.2	217826;217826;217826	0;0;0
chr4	154122433	154143874	21442	*	9.64	9.23	9.95	-0.72	1.02e-13	3.73e-12	569.35	633.7	927	1053.81	Promoter (<=1kb)	4	154056249	154140208	83960	2	22062	uc008wbh.2	0	ENSMUSG00000029026	Trp73	transformation related protein 73	uc008wbh.2;uc008wbi.1;uc008wbj.1	22062;59002;59002	0;0;0
chr16	18575061	18597831	22771	*	10.41	9.87	10.81	-0.94	1.02e-13	3.74e-12	1008.02	859.32	1709	1878.96	Promoter (<=1kb)	16	18581704	18586969	5266	2	21380	uc007yog.2	0	ENSMUSG00000009097	Tbx1	T-box 1	uc007yog.2;uc033gyg.1;uc007yoh.2	21380;21380;21380	0;0;0
chr17	29883401	29896538	13138	*	9.53	9.09	9.86	-0.77	1.16e-13	4.22e-12	558.68	530.7	842	1018.78	Promoter (<=1kb)	17	29827958	29887882	59925	2	74762	uc008bto.1	0	ENSMUSG00000043557	Mdga1	MAM domain containing glycosylphosphatidylinositol anchor 1	uc008bto.1	74762	0
chr9	110724683	110750299	25617	*	10.03	9.69	10.31	-0.63	1.25e-13	4.52e-12	840.02	806.35	1199	1348.65	Promoter (<=1kb)	9	110722085	110742610	20526	2	19228	uc009ruo.1	0	ENSMUSG00000032492	Pth1r	parathyroid hormone 1 receptor	uc009ruo.1;uc009rup.1;uc009ruq.1	19228;19228;19228	0;0;0
chr14	57719552	57763808	44257	*	10.67	10.39	10.9	-0.52	1.4e-13	5.05e-12	1322.03	1358.62	1837	1993.78	Promoter (<=1kb)	14	57642029	57746123	104095	2	50523	uc007udj.1	0	ENSMUSG00000021959	Lats2	large tumor suppressor 2	uc007udj.1;uc007udk.1;uc011zmg.1;uc007udl.1;uc007udm.1;uc007udn.1	50523;50523;50523;50523;50523;50523	0;0;0;0;0;0
chr5	107707619	107740808	33190	*	10.65	10.35	10.9	-0.56	1.4e-13	5.05e-12	1293.36	1309.58	1785	2044.38	Promoter (<=1kb)	5	107716655	107721342	4688	2	14581	uc008ymu.2	0	ENSMUSG00000029275	Gfi1	growth factor independent 1 transcription repressor	uc008yna.1;uc008ynb.1;uc008ymu.2;uc057lmz.1;uc029vkg.1;uc057lna.1;uc029vkh.1;uc057lnb.1;uc008ymx.2;uc008ymt.1	14020;14020;14581;14581;14581;14581;14581;14581;14581;654809	68974;134299;0;0;0;0;0;0;0;0
chr17	8413479	8440820	27342	*	10.18	9.86	10.45	-0.58	1.57e-13	5.64e-12	954.69	909.35	1345	1444	Promoter (<=1kb)	17	8434423	8442496	8074	1	20997	uc008ajq.1	0	ENSMUSG00000062327	T	brachyury, T-box transcription factor T	uc008ajq.1;uc012ajs.2;uc008ajp.1	20997;21331;21331	0;0;0
chr4	124647742	124669413	21672	*	9.7	9.31	10.01	-0.69	1.62e-13	5.78e-12	620.01	650.37	955	1100.52	Promoter (<=1kb)	4	124657646	124660655	3010	1	18991	uc029uzh.1	0	ENSMUSG00000090125	Pou3f1	POU domain, class 3, transcription factor 1	uc029uzh.1	18991	0
chr6	83405564	83468020	62457	*	11.07	10.8	11.29	-0.49	1.68e-13	5.98e-12	1848.71	1717.65	2392	2625.29	Promoter (<=1kb)	6	83362373	83441678	79306	2	194388	uc009cni.3	0	ENSMUSG00000034832	Tet3	tet methylcytosine dioxygenase 3	uc033iss.1;uc009cni.3;uc033isq.2;uc057lqp.1;uc033isr.2;uc009cnl.1;uc009cnm.1;uc012enz.1	102465194;194388;194388;194388;194388;194388;320775;320775	-4462;0;0;0;0;0;0;0
chr15	96578337	96587739	9403	*	7.88	8.35	7.18	1.17	1.98e-13	7.02e-12	328.01	326.66	154	136.23	3' UTR	15	96571418	96641962	70545	2	105727	uc007xkh.2	54223	ENSMUSG00000023169	Slc38a1	solute carrier family 38, member 1	uc007xkh.2;uc007xki.2;uc007xkj.2;uc007xkk.2	105727;105727;105727;105727	0;0;0;0
chr6	64708505	64758553	50049	*	11.02	10.76	11.24	-0.48	2e-13	7.09e-12	1781.37	1690.19	2318	2532.85	Promoter (<=1kb)	6	64729146	64731243	2098	1	11921	uc009ceb.3	0	ENSMUSG00000073043	Atoh1	atonal bHLH transcription factor 1	uc009ceb.3	11921	0
chr9	54687613	54705567	17955	*	9.6	9.21	9.9	-0.69	2.56e-13	9.02e-12	608.68	579.74	907	1004.19	Promoter (<=1kb)	9	54698947	54716317	17371	1	58233	uc009prk.3	0	ENSMUSG00000032285	Dnaja4	DnaJ heat shock protein family (Hsp40) member A4	uc033jkq.1;uc009prk.3;uc009prl.2	100885845;58233;58233	-2746;0;0
chr11	103729288	103759692	30405	*	10.06	9.72	10.34	-0.62	2.59e-13	9.12e-12	864.69	823.02	1221	1366.16	Promoter (<=1kb)	11	103727363	103749821	22459	2	22412	uc007lvr.1	0	ENSMUSG00000018486	Wnt9b	wingless-type MMTV integration site family, member 9B	uc007lvr.1;uc007lvp.1;uc033gav.1	22412;399609;399609	0;31564;31564
chr12	80508513	80536206	27694	*	10	9.67	10.26	-0.59	3.04e-13	1.07e-11	820.02	813.21	1191	1268.86	Promoter (<=1kb)	12	80518471	80603896	85426	1	108760	uc007oaw.1	0	ENSMUSG00000021130	Galnt16	polypeptide N-acetylgalactosaminyltransferase 16	uc007oaw.1;uc007oax.1;uc007oay.1;uc029rty.1	108760;108760;108760;69522	0;0;0;0
chr12	111270137	111281054	10918	*	9.26	8.84	9.58	-0.74	3.15e-13	1.1e-11	450.68	466.93	729	806.66	Promoter (<=1kb)	12	111271096	111276426	5331	1	93835	uc007pcp.2	0	ENSMUSG00000021278	Amn	amnionless	uc007pcl.2;uc007pcn.2;uc007pco.2;uc007pcp.2;uc007pcq.1	22031;22031;22031;93835;93835	103767;103767;21654;0;0
chr5	35374402	35406074	31673	*	10.72	10.21	11.1	-0.89	3.17e-13	1.11e-11	1226.69	1139.87	2020	2377.16	Promoter (<=1kb)	5	35389117	35392872	3756	1	15371	uc008xds.1	0	ENSMUSG00000067438	Hmx1	H6 homeobox 1	uc008xds.1;uc008xdr.1	15371;442795	0;0
chr2	180884868	180896591	11724	*	9.08	8.65	9.41	-0.77	3.25e-13	1.13e-11	389.34	412	669	692.81	Promoter (<=1kb)	2	180894040	180894107	68	1	723951	uc012cmf.1	0	ENSMUSG00000065454	Mir124a-3	microRNA 124a-3	uc012cmf.1	723951	0
chr18	65926578	65956071	29494	*	10.21	9.89	10.46	-0.57	3.88e-13	1.34e-11	988.69	912.29	1386	1435.25	Promoter (<=1kb)	18	65934639	65939089	4451	2	19434	uc008ffl.1	0	ENSMUSG00000024518	Rax	retina and anterior neural fold homeobox	uc008ffl.1;uc008ffm.1	19434;225644	0;0
chrY	140458	146179	5722	*	9.3	9.62	8.88	0.75	4.05e-13	1.4e-11	835.35	743.56	482	458.31	Distal Intergenic	21	206150	207789	1640	1	69438	uc057atw.1	-59971	ENSMUSG00000101796	1700020D14Rik	RIKEN cDNA 1700020D14 gene	NA	NA	NA
chr5	76853199	76868338	15140	*	9.46	9.05	9.78	-0.73	4.13e-13	1.42e-11	564.01	493.42	842	913.69	Promoter (<=1kb)	5	76857530	76873554	16025	1	320827	uc008xvh.2	0	ENSMUSG00000036377	C530008M17Rik	RIKEN cDNA C530008M17 gene	uc008xvf.2;uc008xvh.2	320827;320827	0;0
chr11	112758962	112797992	39031	*	10.45	10.16	10.69	-0.54	4.48e-13	1.53e-11	1153.36	1132.02	1584	1729.11	Promoter (<=1kb)	11	112782210	112787757	5548	1	20682	uc007med.2	0	ENSMUSG00000000567	Sox9	SRY (sex determining region Y)-box 9	uc007mee.2;uc056ypd.1;uc007med.2;uc007mec.1	100038732;100038732;20682;217294	0;0;0;0
chr7	110611912	110637934	26023	*	9.83	9.5	10.1	-0.6	4.75e-13	1.62e-11	723.35	726.89	1103	1096.63	Promoter (<=1kb)	7	110627669	110629819	2151	1	11535	uc009jfj.1	0	ENSMUSG00000030790	Adm	adrenomedullin	uc009jfj.1;uc009jfe.2;uc009jff.2;uc009jfg.2;uc009jfh.2;uc009jfi.2	11535;319934;319934;319934;319934;319934	0;0;0;0;0;0
chr11	75162559	75176272	13714	*	9.37	8.94	9.7	-0.76	4.88e-13	1.66e-11	462.01	519.91	771	896.18	Promoter (<=1kb)	11	75164565	75168152	3588	2	15248	uc007kdc.1	0	ENSMUSG00000043099	Hic1	hypermethylated in cancer 1	uc007kcz.1;uc011xze.1;uc007kdc.1;uc007kdd.1;uc007kdf.1;uc007kdg.1;uc011xzh.1;uc011xzg.1	103677;103677;15248;15248;246257;246257;387150;387208	0;0;0;0;0;0;0;0
chr2	29230980	29265949	34970	*	10.21	9.9	10.46	-0.56	4.92e-13	1.66e-11	970.69	936.81	1358	1460.55	Promoter (<=1kb)	2	29194726	29248099	53374	2	171171	uc008izo.2	0	ENSMUSG00000035513	Ntng2	netrin G2	uc008izo.2;uc008izp.2;uc012btf.2;uc008izq.1	171171;171171;171171;76220	0;0;0;0
chr7	44474791	44483424	8634	*	8.63	8.11	9.01	-0.9	4.92e-13	1.66e-11	261.34	291.34	490	541.99	Promoter (1-2kb)	7	44484517	44485413	897	1	71368	uc009gpo.3	-1093	ENSMUSG00000108322	5430431A17Rik	RIKEN cDNA 5430431A17 gene	uc033iza.1;uc009gpl.2;uc009gpm.2;uc009gpn.2;uc029wfd.1;uc029wfe.1;uc029wff.1;uc009gpo.3	102465637;66124;66124;66124;66124;66124;66124;71368	4444;6811;6811;6811;6811;6811;6811;-1093
chr6	126633194	126656454	23261	*	9.88	9.55	10.15	-0.6	5.29e-13	1.79e-11	756.02	743.56	1104	1174.47	Promoter (<=1kb)	6	126636463	126645801	9339	2	16485	uc009dvb.1	0	ENSMUSG00000047976	Kcna1	potassium voltage-gated channel, shaker-related subfamily, member 1	uc009dvb.1	16485	0
chr1	192825217	192872901	47685	*	10.77	10.51	10.99	-0.48	5.75e-13	1.94e-11	1461.37	1451.81	1960	2116.38	Promoter (<=1kb)	1	192854928	192856856	1929	1	100503471	uc007edt.3	0	NA	Gm15867	predicted gene 15867	uc007edt.3;uc011wyx.1;uc007eds.2;uc007edr.2	100503471;214791;214791;73455	0;0;0;0
chr7	19517123	19526564	9442	*	8.9	8.43	9.25	-0.82	5.81e-13	1.95e-11	343.34	346.28	576	639.29	Promoter (<=1kb)	7	19518731	19525050	6320	1	69547	uc009fme.2	0	ENSMUSG00000060621	Nkpd1	NTPase, KAP family P-loop domain containing 1	uc009fmg.1;uc009fmh.1;uc009fmb.1;uc009fmc.1;uc009fmd.1;uc009fme.2	232947;232947;67091;67091;67091;69547	6418;35834;8394;8394;8394;0
chr4	123161394	123216476	55083	*	10.86	10.59	11.08	-0.49	6.05e-13	2.02e-11	1601.37	1490.07	2096	2240.93	Promoter (<=1kb)	4	123183504	123194699	11196	1	170638	uc008uox.1	0	ENSMUSG00000046093	Hpcal4	hippocalcin-like 4	uc008uox.1;uc008uoy.1	170638;230718	0;0
chr6	119104036	119116273	12238	*	9.01	8.58	9.35	-0.77	6.43e-13	2.14e-11	378.68	384.53	635	666.54	Promoter (<=1kb)	6	118587240	119108495	521256	2	12288	uc009dlt.3	0	ENSMUSG00000051331	Cacna1c	calcium channel, voltage-dependent, L type, alpha 1C subunit	uc009dlt.3;uc012erg.3;uc012erj.3;uc012erk.3;uc012erl.2;uc012erm.2;uc009dlu.3;uc009dlv.4;uc012erh.3;uc012eri.3	12288;12288;12288;12288;12288;12288;12288;12288;12288;12288	0;0;0;0;0;0;0;0;0;0
chr19	46314615	46329980	15366	*	9.15	8.72	9.48	-0.76	6.62e-13	2.2e-11	408.01	434.56	678	747.3	Promoter (<=1kb)	19	46328184	46330446	2263	1	68431	uc008hte.1	0	ENSMUSG00000025226	Fbxl15	F-box and leucine-rich repeat protein 15	uc008hst.2;uc008hsu.2;uc008hsv.1;uc008hsx.2;uc008hsy.2;uc008hsz.1;uc008hta.1;uc008htg.2;uc008hth.2;uc008hti.2;uc012bmu.1;uc012bmv.1;uc012bmw.1;uc012bmx.1;uc008hte.1;uc008htf.1;uc012bms.1;uc008htb.1;uc008htc.1;uc012bmt.1;uc008htd.1	18034;18034;18034;18034;18034;18034;18034;67116;67116;67116;67116;67116;67116;67116;68431;68431;73728;73728;73728;73728;73728	0;0;0;0;0;0;0;0;0;0;0;0;0;0;0;0;0;0;0;0;0
chr11	115244569	115268390	23822	*	9.89	9.55	10.16	-0.61	6.67e-13	2.21e-11	730.02	769.07	1099	1189.07	Promoter (<=1kb)	11	115249169	115266313	17145	2	14813	uc011yhk.1	0	ENSMUSG00000020734	Grin2c	glutamate receptor, ionotropic, NMDA2C (epsilon 3)	uc007mgy.1;uc011yhk.1;uc007mgx.1;uc007mgu.2;uc007mgv.2;uc007mgw.2;uc011yhj.1	14149;14813;14813;320534;320534;320534;320534	0;0;0;0;0;0;0
chr11	76992781	77001631	8851	*	8.7	8.2	9.06	-0.86	7.22e-13	2.38e-11	303.34	285.46	517	553.66	Promoter (<=1kb)	11	76998597	77032343	33747	1	15567	uc007kgf.2	0	ENSMUSG00000020838	Slc6a4	solute carrier family 6 (neurotransmitter transporter, serotonin), member 4	uc007kgf.2	15567	0
chr8	99077442	99466263	388822	*	13.67	13.57	13.76	-0.19	7.43e-13	2.45e-11	12179.6	12215.8	13810	13969.1	Promoter (<=1kb)	8	99024471	99416471	392001	2	12564	uc009mzm.2	0	ENSMUSG00000036510	Cdh8	cadherin 8	uc009mzm.2;uc033jhb.1;uc009mzn.2;uc009mzo.2;uc009mzq.1;uc009mzr.2;uc009mzs.2	12564;12564;12564;12564;12564;234624;234624	0;0;0;0;0;0;0
chr12	110264898	110293992	29095	*	10.13	9.79	10.4	-0.61	8.38e-13	2.74e-11	863.35	913.27	1262	1446.92	Promoter (<=1kb)	12	110278048	110278129	82	2	100526515	uc011yup.1	0	ENSMUSG00000080356	Mir1247	microRNA 1247	uc011yup.1;uc007pbi.1;uc007pbh.2;uc011yum.2;uc011yun.2;uc011yuo.2	100526515;107585;353504;353504;353504;353504	0;0;0;0;0;0
chr18	35898464	35939143	40680	*	10.53	10.26	10.76	-0.5	8.38e-13	2.74e-11	1222.69	1231.1	1693	1771.92	Exon (uc008emz.1/uc008emz.1, exon 1 of 2)	18	35964830	36014715	49886	1	74002	uc008ena.4	-25687	ENSMUSG00000024347	Psd2	pleckstrin and Sec7 domain containing 2	NA	NA	NA
chr13	62536812	62556587	19776	*	8.84	9.19	8.36	0.83	8.45e-13	2.76e-11	604.01	566.01	344	313.32	Promoter (2-3kb)	13	62453016	62558599	105584	2	71508	uc007qwx.4	2012	ENSMUSG00000113450	Zfp935	zinc finger protein 935	uc007qwx.4;uc007qwy.2;uc007qwz.2;uc007qxa.2	71508;77117;77117;77117	0;0;0;0
chr9	95546621	95575745	29125	*	10.21	9.9	10.47	-0.57	8.66e-13	2.82e-11	927.35	982.92	1352	1478.06	Promoter (<=1kb)	9	95559817	95562121	2305	1	75552	uc009rbf.1	0	ENSMUSG00000064225	Paqr9	progestin and adipoQ receptor family member IX	uc009rbf.1	75552	0
chr6	14892280	14907817	15538	*	9.37	8.98	9.68	-0.7	8.79e-13	2.85e-11	511.35	497.34	787	849.47	Promoter (<=1kb)	6	14901349	15287750	386402	1	114142	uc009ayx.1	0	ENSMUSG00000029563	Foxp2	forkhead box P2	uc009ayx.1;uc009ayy.1;uc009ayz.1	114142;114142;114142	0;0;0
chr17	8792203	8812919	20717	*	9.7	9.35	9.98	-0.63	8.85e-13	2.86e-11	662.68	643.51	985	1031.43	Promoter (<=1kb)	17	8801745	8899189	97445	1	23984	uc012ajt.1	0	ENSMUSG00000023868	Pde10a	phosphodiesterase 10A	uc008ajr.1;uc012ajt.1;uc008ajs.1;uc008ajt.1	23984;23984;23984;23984	0;0;0;0
chr15	75726402	75750167	23766	*	9.69	9.32	9.98	-0.66	8.95e-13	2.89e-11	656.02	623.89	953	1073.27	Promoter (<=1kb)	15	75746843	75747922	1080	2	378435	uc007whe.1	0	ENSMUSG00000047591	Mafa	v-maf musculoaponeurotic fibrosarcoma oncogene family, protein A (avian)	uc007whf.1;uc007whe.1	223642;378435	91741;0
chr10	80482388	80519213	36826	*	10.83	10.39	11.16	-0.78	9.58e-13	3.08e-11	1336.7	1341.95	2123	2462.79	Promoter (<=1kb)	10	80494906	80517266	22361	1	246086	uc007gdn.2	0	ENSMUSG00000045518	Onecut3	one cut domain, family member 3	uc007gdn.2;uc007gdo.1;uc011xis.1	246086;67331;67331	0;19911;19911
chr11	82927375	82960537	33163	*	10.31	9.99	10.57	-0.58	9.74e-13	3.12e-11	1008.69	1022.16	1413	1626.94	Promoter (<=1kb)	11	82952102	82958802	6701	1	327978	uc007kny.1	0	ENSMUSG00000054404	Slfn5	schlafen 5	uc007knu.2;uc007knv.2;uc007knw.1;uc007kny.1;uc007knz.2;uc007koa.2;uc007knx.2	217012;217012;217012;327978;327978;327978;76392	0;0;0;0;0;0;0
chr3	87790485	87839864	49380	*	10.82	10.55	11.05	-0.5	1.03e-12	3.29e-11	1492.03	1506.75	1998	2228.28	Promoter (<=1kb)	3	87778244	87795162	16919	2	18211	uc008psw.1	0	ENSMUSG00000028072	Ntrk1	neurotrophic tyrosine kinase, receptor, type 1	uc008psw.1;uc008psx.2;uc008psy.2	18211;23920;23920	0;0;0
chr10	79736056	79741703	5648	*	7.45	7.97	6.63	1.33	1.03e-12	3.29e-11	262.67	237.39	101	97.3	3' UTR	10	79716634	79736108	19475	1	15166	uc007fzn.1	19422	ENSMUSG00000020331	Hcn2	hyperpolarization-activated, cyclic nucleotide-gated K+ 2	uc007fzn.1;uc007fzo.2;uc011xhz.1	15166;216151;216151	0;0;0
chr11	82377282	82396874	19593	*	9.59	9.22	9.89	-0.67	1.09e-12	3.47e-11	608.01	585.63	897	1000.29	Promoter (<=1kb)	11	82388900	82446361	57462	1	270893	uc007kmv.2	0	ENSMUSG00000020701	Tmem132e	transmembrane protein 132E	uc007kmv.2;uc011yaw.2	270893;270893	0;0
chr5	31086979	31107961	20983	*	9.79	9.44	10.07	-0.63	1.31e-12	4.16e-11	674.02	713.15	1019	1126.79	Promoter (<=1kb)	5	31086106	31093527	7422	2	22784	uc008wxa.3	0	ENSMUSG00000029151	Slc30a3	solute carrier family 30 (zinc transporter), member 3	uc008wxa.3;uc008wxc.1;uc057llw.1	22784;231098;231098	0;-358;-926
chr13	56748737	56757408	8672	*	8.57	8.05	8.96	-0.9	1.34e-12	4.22e-11	261.34	269.76	462	532.26	Distal Intergenic	13	56703668	56742378	38711	1	17129	uc007qta.2	45069	ENSMUSG00000021540	Smad5	SMAD family member 5	NA	NA	NA
chr15	80280601	80292906	12306	*	8.87	8.41	9.21	-0.8	1.35e-12	4.26e-11	340.01	342.35	573	613.99	Promoter (<=1kb)	15	80287238	80398292	111055	1	239556	uc009var.1	0	ENSMUSG00000022416	Cacna1i	calcium channel, voltage-dependent, alpha 1I subunit	uc009var.1	239556	0
chr2	165230207	165245921	15715	*	9.24	8.84	9.55	-0.72	1.36e-12	4.27e-11	468.01	446.33	730	772.6	Promoter (<=1kb)	2	165111507	165234737	123231	2	104010	uc008nxc.2	0	ENSMUSG00000053166	Cdh22	cadherin 22	uc008nxc.2	104010	0
chr15	79793199	79816662	23464	*	9.83	9.49	10.1	-0.61	1.51e-12	4.74e-11	714.02	722.96	1048	1145.28	Promoter (<=1kb)	15	79786351	79804709	18359	2	73340	uc007wul.2	0	ENSMUSG00000022421	Nptxr	neuronal pentraxin receptor	uc007wum.1;uc007wun.1;uc007wul.2	504193;504193;73340	0;0;0
chr5	111408446	111425343	16898	*	9.33	8.94	9.65	-0.71	1.61e-12	5.03e-11	478.68	501.27	758	843.63	Promoter (<=1kb)	5	111418166	111457025	38860	1	433938	uc008yse.1	0	ENSMUSG00000070576	Mn1	meningioma 1	uc008yse.1	433938	0
chr6	72210746	72246635	35890	*	10.22	9.92	10.47	-0.55	1.93e-12	6e-11	973.36	959.37	1352	1483.9	Promoter (<=1kb)	6	72206177	72235577	29401	2	71093	uc009cic.2	0	ENSMUSG00000037621	Atoh8	atonal bHLH transcription factor 8	uc009cic.2;uc012enh.2	71093;71093	0;0
chr6	31184365	31277163	92799	*	11.53	11.33	11.71	-0.38	1.98e-12	6.16e-11	2603.39	2556.37	3251	3450.43	Promoter (<=1kb)	6	31093563	31218474	124912	2	232685	uc033ioo.1	0	ENSMUSG00000044471	Lncpint	long non-protein coding RNA, Trp53 induced transcript	uc033ioo.1;uc009bfy.2;uc033iop.1;uc033ioq.1;uc009bfz.3;uc009bga.3;uc012ejs.3;uc029vtz.2;uc029vua.2;uc029vub.2	232685;232685;232685;232685;73652;73652;73652;73652;73652;73652	0;0;0;0;0;0;0;0;0;0
chr2	92596292	92608754	12463	*	8.74	8.28	9.1	-0.82	2.06e-12	6.37e-11	302.67	317.83	535	560.48	Promoter (<=1kb)	2	92599707	92615252	15546	1	76969	uc008lfk.2	0	ENSMUSG00000027221	Chst1	carbohydrate sulfotransferase 1	uc008ley.2;uc033hok.1;uc008lfk.2	102465704;102466819;76969	1690;4086;0
chr1	62694724	62723851	29128	*	10.06	9.75	10.31	-0.56	2.22e-12	6.85e-11	852.69	871.09	1227	1319.45	Promoter (<=1kb)	1	62703317	62739932	36616	1	18187	uc007bfi.1	0	ENSMUSG00000025969	Nrp2	neuropilin 2	uc007bfi.1;uc007bfj.1;uc007bfk.1;uc007bfl.1;uc007bfm.1;uc007bfn.1;uc007bfo.1	18187;18187;18187;18187;18187;18187;18187	0;0;0;0;0;0;0
chr5	24519527	24532749	13223	*	9.23	8.83	9.54	-0.71	2.33e-12	7.19e-11	470.68	440.45	729	764.82	Promoter (<=1kb)	5	24504426	24526848	22423	2	231044	uc008wrx.1	0	ENSMUSG00000067724	Gbx1	gastrulation brain homeobox 1	uc008wry.2;uc057btj.1;uc008wrx.1	117590;117590;231044	0;0;0
chr10	52003532	52035459	31928	*	10.42	10.14	10.66	-0.52	2.52e-12	7.73e-11	1111.36	1146.74	1551	1683.37	Promoter (<=1kb)	10	52022502	52028471	5970	1	215031	uc007faz.2	0	ENSMUSG00000049641	Vgll2	vestigial like family member 2	uc007faz.2;uc007fba.2	215031;215031	0;0
chr11	119513036	119567405	54370	*	10.69	10.42	10.92	-0.5	2.53e-12	7.75e-11	1343.36	1395.9	1838	2027.83	Promoter (<=1kb)	11	119548630	119569046	20417	1	100503830	uc029rqb.1	0	ENSMUSG00000087675	Gm11762	predicted gene 11762	uc029rqb.1;uc007mqv.1;uc007mqt.2;uc007mqu.2	100503830;18164;338371;338371	0;0;21689;21416
chr16	9983195	10003284	20090	*	9.57	9.21	9.86	-0.65	2.66e-12	8.12e-11	605.35	578.76	891	967.21	Promoter (<=1kb)	16	9577710	9992533	414824	2	14811	uc007ydc.1	0	ENSMUSG00000059003	Grin2a	glutamate receptor, ionotropic, NMDA2A (epsilon 1)	uc007ydc.1	14811	0
chr4	126278756	126308991	30236	*	10.17	9.87	10.42	-0.55	2.78e-12	8.45e-11	951.36	920.14	1321	1412.87	Promoter (<=1kb)	4	126286794	126314330	27537	1	329941	uc008utd.1	0	ENSMUSG00000056174	Col8a2	collagen, type VIII, alpha 2	uc008utc.1;uc008utd.1	27096;329941	0;0
chr12	72908132	72951253	43122	*	10.78	10.53	10.99	-0.47	2.8e-12	8.51e-11	1449.37	1500.86	1971	2101.79	Promoter (<=1kb)	12	72939882	72944899	5018	1	20476	uc007nvy.2	0	ENSMUSG00000021099	Six6	sine oculis-related homeobox 6	uc007nvy.2;uc011ynp.1;uc007nvv.1;uc011ynq.1;uc057kol.1;uc007nvx.1	20476;75801;75801;75801;75801;75801	0;0;0;0;0;0
chr17	27287143	27419626	132484	*	12.26	12.39	12.1	0.29	2.84e-12	8.6e-11	5452.79	5297.16	4337	4467.27	Promoter (<=1kb)	17	27317035	27317095	61	2	102465700	uc008biu.3	0	ENSMUSG00000105142	Mir7214	microRNA 7214	uc008biu.3;uc029tft.2;uc033hci.1;uc033hch.1;uc008bow.2	102465700;102465701;102466228;102466818;268934	0;0;0;0;0
chr17	23738200	23750328	12129	*	9.43	9.04	9.73	-0.69	2.99e-12	9.03e-11	549.35	502.25	810	892.29	Promoter (<=1kb)	17	23743234	23751234	8001	1	638247	uc008ate.1	0	ENSMUSG00000097006	9530082P21Rik	RIKEN cDNA 9530082P21 gene	uc008ath.1;uc008asz.1;uc008ata.1;uc008atc.1;uc008ate.1;uc008atf.1;uc008atg.1;uc008atd.1;uc008atb.1	224613;268930;268930;268930;638247;638247;638247;73016;76498	12990;11864;11864;1845;0;0;0;0;0
chr12	80737338	80768215	30878	*	10.23	9.94	10.48	-0.54	3.1e-12	9.34e-11	964.69	999.59	1371	1484.87	Promoter (<=1kb)	12	80755447	80760715	5269	2	380768	uc007obh.2	0	ENSMUSG00000062961	Ccdc177	coiled-coil domain containing 177	uc007obh.2	380768	0
chr6	145848379	145871494	23116	*	9.91	9.58	10.17	-0.59	3.17e-12	9.51e-11	760.02	771.03	1099	1207.55	Promoter (<=1kb)	6	145858243	145865420	7178	2	79362	uc009ert.2	0	ENSMUSG00000030256	Bhlhe41	basic helix-loop-helix family, member e41	uc009ert.2;uc033ivw.1	79362;79362	0;0
chr18	15056472	15084214	27743	*	10.07	9.76	10.32	-0.56	3.19e-12	9.56e-11	874.02	862.26	1231	1328.21	Promoter (<=1kb)	18	14968685	15063582	94898	2	106931	uc008edn.2	0	ENSMUSG00000036225	Kctd1	potassium channel tetramerisation domain containing 1	uc008edn.2;uc008edo.1;uc008edp.2	106931;106931;106931	0;0;0
chr1	74931129	74965314	34186	*	10.35	10.06	10.59	-0.52	3.37e-12	1.01e-10	1079.36	1059.43	1476	1599.69	Promoter (<=1kb)	1	74945315	74951672	6358	2	16147	uc007bnl.3	0	ENSMUSG00000006538	Ihh	Indian hedgehog	uc007bnl.3;uc007bnm.2;uc007bnj.1;uc007bnk.2;uc029qpd.2	16147;16147;241116;241116;75570	0;0;0;0;159912
chr5	119773411	119816374	42964	*	10.62	10.33	10.85	-0.52	3.51e-12	1.05e-10	1310.03	1267.39	1736	1960.69	Exon (uc008zgx.1/uc008zgx.1, exon 1 of 2)	5	119834663	119885218	50556	1	21388	uc008zgz.2	-18289	ENSMUSG00000018263	Tbx5	T-box 5	NA	NA	NA
chr12	67209118	67234252	25135	*	9.79	9.42	10.09	-0.66	3.58e-12	1.06e-10	670.02	701.38	992	1182.25	Promoter (<=1kb)	12	66466059	67222549	756491	2	320772	uc007nrl.3	0	ENSMUSG00000034912	Mdga2	MAM domain containing glycosylphosphatidylinositol anchor 2	uc007nrl.3;uc007nrm.3;uc011ymi.1;uc007nro.2	320772;320772;320772;320772	0;0;0;0
chr6	29503947	29532593	28647	*	9.93	9.61	10.18	-0.57	3.66e-12	1.08e-10	772.02	793.59	1130	1197.82	Promoter (<=1kb)	6	29526625	29537320	10696	1	27056	uc009bdu.2	0	ENSMUSG00000029771	Irf5	interferon regulatory factor 5	uc009bdu.2;uc009bdv.2;uc009bdw.2;uc009bdt.2;uc012eje.2	27056;27056;27056;333088;333088	0;0;0;0;0
chr13	62155578	62192771	37194	*	9.97	10.22	9.66	0.56	3.81e-12	1.13e-10	1181.36	1209.52	806	814.44	3' UTR	13	61804312	62173936	369625	1	630579	uc029sbp.1	351266	ENSMUSG00000074867	Zfp808	zinc finger protein 808	uc029sbp.1;uc029sbq.1;uc007qws.1;uc007qwt.1	630579;630579;630579;630579	0;0;0;0
chr11	69111441	69128416	16976	*	9.74	9.41	10.01	-0.6	3.9e-12	1.15e-10	688.68	675.88	1010	1055.76	Promoter (<=1kb)	11	69126377	69149115	22739	1	23801	uc007jpj.2	0	ENSMUSG00000020892	Aloxe3	arachidonate lipoxygenase 3	uc007jpf.1;uc007jpg.3;uc007jph.3;uc011xwu.2;uc007jpj.2;uc007jpi.1	18626;18626;18626;18626;23801;84653	16187;12485;11283;10932;0;0
chr18	37279979	37363995	84017	*	11.51	11.32	11.69	-0.37	4.21e-12	1.24e-10	2585.39	2517.13	3218	3375.51	Promoter (<=1kb)	18	37294840	37297614	2775	1	93873	uc008epn.1	0	ENSMUSG00000051599	Pcdhb2	protocadherin beta 2	uc008eoy.3;uc056zgg.2;uc056zgh.2;uc008epn.1;uc008epo.1;uc008epp.1;uc008epq.1;uc008epr.1;uc008eps.1;uc008ept.1	100384868;103611158;103611159;93873;93874;93875;93876;93877;93878;93879	0;0;0;0;0;0;0;0;0;0
chr11	94463168	94479069	15902	*	9.09	8.67	9.41	-0.73	4.32e-12	1.26e-10	394.68	421.81	657	699.62	Promoter (<=1kb)	11	94408391	94474198	65808	2	12291	uc007kyr.2	0	ENSMUSG00000020866	Cacna1g	calcium channel, voltage-dependent, T type, alpha 1G subunit	uc007kyr.2;uc007kys.2;uc011ycv.1;uc011ycw.1;uc007kyt.1	12291;12291;12291;12291;217116	0;0;0;0;0
chr8	26958096	27028465	70370	*	11.52	11.32	11.69	-0.38	4.38e-12	1.28e-10	2536.73	2561.27	3195	3427.08	Promoter (<=1kb)	8	27023799	27039437	15639	1	244373	uc009lhr.3	0	ENSMUSG00000031483	Erlin2	ER lipid raft associated 2	uc009lhr.3;uc012gbp.1;uc012gbq.1	244373;353310;353310	0;0;0
chr10	87476593	87511605	35013	*	10.46	10.17	10.7	-0.53	4.45e-12	1.3e-10	1163.36	1137.91	1565	1757.33	Promoter (<=1kb)	10	87491041	87493660	2620	2	17172	uc007gqs.1	0	ENSMUSG00000020052	Ascl1	achaete-scute family bHLH transcription factor 1	uc007gqs.1	17172	0
chr3	134227282	134262021	34740	*	10.29	10	10.53	-0.53	4.56e-12	1.33e-10	990.02	1064.34	1444	1513.09	Promoter (<=1kb)	3	134240505	134240583	79	2	100316832	uc012cya.1	0	ENSMUSG00000084564	Mir1895	microRNA 1895	uc012cya.1;uc008rkw.3	100316832;319478	0;0
chr2	152932468	152963283	30816	*	10.01	9.7	10.26	-0.56	4.63e-12	1.34e-10	822.69	838.72	1183	1267.88	Promoter (<=1kb)	2	152931898	152933208	1311	2	14239	uc008ngt.1	0	ENSMUSG00000074676	Foxs1	forkhead box S1	uc008ngt.1;uc012cgl.1;uc008ngu.2;uc012cgm.4;uc008ngv.1;uc008ngw.1;uc012cgn.1;uc008ngx.1	14239;252864;252864;252864;74711;74711;74711;74711	0;0;0;0;0;0;0;0
chr1	87147765	87160730	12966	*	9.38	9	9.68	-0.68	4.77e-12	1.38e-10	533.35	488.52	795	847.53	Promoter (<=1kb)	1	87147655	87156136	8482	2	13599	uc007bwd.1	0	ENSMUSG00000026247	Ecel1	endothelin converting enzyme-like 1	uc007bwd.1;uc007bwc.2	13599;13599	0;0
chr2	172719423	172743335	23913	*	9.97	9.67	10.22	-0.56	4.85e-12	1.4e-10	813.35	811.25	1167	1226.04	Distal Intergenic	2	172550991	172558622	7632	1	21420	uc008oda.3	168432	ENSMUSG00000028640	Tfap2c	transcription factor AP-2, gamma	NA	NA	NA
chr5	127225684	127256527	30844	*	10.07	9.77	10.32	-0.55	4.97e-12	1.43e-10	888.69	861.28	1246	1312.64	Promoter (<=1kb)	5	127241826	127565790	323965	1	208213	uc008zry.2	0	ENSMUSG00000034324	Tmem132c	transmembrane protein 132C	uc008zry.2;uc008zrz.2;uc029vot.1;uc029vou.1	208213;67351;67351;67351	0;25096;25096;25096
chr17	35193381	35215578	22198	*	9.89	9.55	10.16	-0.6	5.36e-12	1.54e-10	744.02	760.24	1073	1214.36	Promoter (<=1kb)	17	35194972	35195049	78	1	102465588	uc033hdg.1	0	ENSMUSG00000098291	Mir6973a	microRNA 6973a	uc033hdg.1;uc033hdh.1;uc008cgn.1;uc008cgo.2;uc008cgu.2;uc008cgp.2;uc008cgq.2;uc008cgv.1;uc008cgr.2;uc012arb.2	102465588;102466990;16988;16988;16992;16994;16994;18038;21926;21926	0;0;-4941;-4941;0;0;0;20237;0;0
chr1	7119518	7134263	14746	*	8.87	9.21	8.42	0.79	5.53e-12	1.58e-10	601.35	582.69	361	323.05	5' UTR	1	7088920	7173628	84709	1	319263	uc007agb.1	30598	ENSMUSG00000051285	Pcmtd1	protein-L-isoaspartate (D-aspartate) O-methyltransferase domain containing 1	uc007agb.1;uc007agc.1;uc011why.1	319263;319263;319263	0;0;0
chr3	17759706	17818340	58635	*	11.17	10.95	11.37	-0.42	5.76e-12	1.64e-10	1992.05	1968.78	2543	2744	Promoter (<=1kb)	3	17789921	17800071	10151	1	70441	uc008orj.2	0	ENSMUSG00000100252	Mir124-2hg	Mir124-2 host gene (non-protein coding)	uc008orj.2;uc057lfm.1;uc012cnp.1	70441;70441;723950	0;0;0
chr11	95007878	95025542	17665	*	9.42	9.03	9.73	-0.7	5.81e-12	1.65e-10	509.35	536.58	785	917.58	Promoter (<=1kb)	11	95009879	95026087	16209	1	217125	uc007kzt.1	0	ENSMUSG00000047181	Samd14	sterile alpha motif domain containing 14	uc007kzu.2;uc007kzr.2;uc007kzs.2;uc007kzt.1	18604;217124;217124;217125	15829;16666;11814;0
chr11	120518562	120534388	15827	*	9.25	8.86	9.55	-0.69	5.87e-12	1.67e-10	467.34	461.05	723	778.44	Promoter (<=1kb)	11	120530727	120538983	8257	1	14527	uc011yjd.1	0	ENSMUSG00000025127	Gcgr	glucagon receptor	uc011yjd.1;uc007mtc.2	14527;14527	0;0
chr4	124876272	124902381	26110	*	10.1	9.77	10.37	-0.6	5.91e-12	1.67e-10	892.02	852.45	1223	1419.68	Promoter (<=1kb)	4	124881785	124886508	4724	1	230735	uc008urh.2	0	ENSMUSG00000028876	Epha10	Eph receptor A10	uc008urh.2;uc008uri.2;uc029uzi.1	230735;230735;73628	0;0;0
chr18	20947850	20955740	7891	*	8.16	8.57	7.58	0.99	6.13e-12	1.73e-10	397.34	362.95	195	186.83	Intron (uc008eez.1/67664, intron 1 of 5)	18	20944625	20983848	39224	1	67664	uc008eez.1	3225	ENSMUSG00000033107	Rnf125	ring finger protein 125	uc008eez.1	67664	0
chr13	113019132	113050644	31513	*	10.17	9.88	10.41	-0.53	6.29e-12	1.77e-10	954.02	933.87	1326	1401.19	Promoter (<=1kb)	13	113037419	113037498	80	1	100190765	uc011zes.1	0	ENSMUSG00000078027	Mir449b	microRNA 449b	uc011zes.1;uc033gng.1;uc007rxb.1;uc011zet.1;uc011zer.1	100190765;238896;69590;723868;735309	0;0;0;0;0
chr19	45063305	45089197	25893	*	9.87	9.55	10.12	-0.57	6.63e-12	1.86e-10	749.35	750.43	1084	1148.2	Promoter (<=1kb)	19	45075241	45079289	4049	1	107250	uc008hqs.2	0	ENSMUSG00000025213	Kazald1	Kazal-type serine peptidase inhibitor domain 1	uc008hqs.2;uc008hqt.2	107250;107250	0;0
chr6	53813544	53829886	16343	*	9.49	9.12	9.79	-0.67	6.66e-12	1.87e-10	590.01	524.81	867	902.02	Promoter (<=1kb)	6	53815468	53820825	5358	2	66873	uc009bzk.2	0	ENSMUSG00000043496	Tril	TLR4 interactor with leucine-rich repeats	uc009bzk.2	66873	0
chr6	115985773	115997145	11373	*	8.84	8.38	9.19	-0.8	6.88e-12	1.92e-10	311.34	357.07	563	601.34	Promoter (<=1kb)	6	115954811	115995005	40195	2	67784	uc009djn.1	0	ENSMUSG00000030123	Plxnd1	plexin D1	uc009djn.1	67784	0
chr12	84560215	84575206	14992	*	9.24	8.86	9.54	-0.69	6.99e-12	1.95e-10	455.34	470.86	723	769.68	Promoter (<=1kb)	12	84569828	84595457	25630	1	12677	uc007ofm.2	0	ENSMUSG00000021239	Vsx2	visual system homeobox 2	uc007ofm.2;uc007ofn.2	12677;12677	0;0
chr5	73001192	73018211	17020	*	9.46	9.1	9.74	-0.64	7.11e-12	1.98e-10	541.35	556.2	840	869.91	Promoter (<=1kb)	5	73006904	73012955	6052	1	231290	uc008xsk.1	0	ENSMUSG00000029219	Slc10a4	solute carrier family 10 (sodium/bile acid cotransporter family), member 4	uc008xsk.1;uc008xsl.1;uc008xsm.1;uc008xsn.1	231290;72313;72313;72313	0;28790;53367;238407
chr15	58065570	58086542	20973	*	9.63	9.29	9.9	-0.61	7.23e-12	2e-10	622.01	632.72	943	966.24	Promoter (<=1kb)	15	58047003	58076508	29506	2	22770	uc007vtd.2	0	ENSMUSG00000022361	Zhx1	zinc fingers and homeoboxes 1	uc007vtd.2;uc007vte.2;uc007vtc.2	22770;22770;75758	0;0;0
chr12	111438162	111472064	33903	*	10.11	9.82	10.36	-0.54	7.45e-12	2.06e-10	920.69	880.9	1275	1348.65	Promoter (<=1kb)	12	111442661	111455018	12358	1	21928	uc007pcy.2	0	ENSMUSG00000021281	Tnfaip2	tumor necrosis factor, alpha-induced protein 2	uc007pcy.2;uc007pcz.2	21928;21928	0;0
chr11	76660945	76689705	28761	*	10	9.69	10.25	-0.56	7.48e-12	2.06e-10	838.02	816.15	1180	1251.34	Promoter (<=1kb)	11	76679873	76698664	18792	1	237858	uc007kfy.2	0	ENSMUSG00000046275	Trarg1	trafficking regulator of GLUT4 (SLC2A4) 1	uc007kfy.2;uc007kfx.1	237858;320522	0;0
chr19	5555609	5569787	14179	*	9.32	8.95	9.61	-0.66	7.88e-12	2.17e-10	492.01	495.38	775	788.17	Promoter (<=1kb)	19	5549137	5560575	11439	2	18426	uc008gdu.1	0	ENSMUSG00000024922	Ovol1	ovo like zinc finger 1	uc008gdu.1;uc008gdv.1;uc008gdw.1	18426;381201;381201	0;0;0
chr2	118695961	118763293	67333	*	11.4	11.05	11.69	-0.64	8.2e-12	2.25e-10	2112.72	2120.83	3079	3531.19	Promoter (<=1kb)	2	118745758	118748810	3053	1	100043272	uc012cbk.2	0	ENSMUSG00000074918	Inafm2	InaF motif containing 2	uc012cbk.2;uc008lsi.1;uc012cbj.1;uc008lsj.1;uc008lsk.1;uc008lsl.1;uc008lsf.2;uc008lsg.2;uc008lsn.1;uc012cbl.1;uc008lsh.1	100043272;18796;18796;18796;18796;18796;214230;214230;214239;214239;383787	0;0;0;0;0;0;0;0;0;0;0
chr10	103016073	103059440	43368	*	10.51	10.24	10.74	-0.49	8.31e-12	2.28e-10	1234.7	1190.88	1646	1768.03	Promoter (<=1kb)	10	103007847	103028777	20931	2	216285	uc007gyg.1	0	ENSMUSG00000036602	Alx1	ALX homeobox 1	uc007gyg.1;uc011xmu.1	216285;74978	0;0
chr14	54539104	54555359	16256	*	8.68	9.05	8.2	0.84	8.42e-12	2.3e-10	546.68	510.1	314	275.37	Promoter (<=1kb)	14	54541785	54554361	12577	2	219072	uc007twh.2	0	ENSMUSG00000022177	Haus4	HAUS augmin-like complex, subunit 4	uc007twh.2	219072	0
chr8	92113619	92493353	379735	*	13.66	13.57	13.75	-0.19	8.7e-12	2.37e-10	12143.6	12096.2	13579	14035.2	Promoter (<=1kb)	8	92357796	92361456	3661	1	54352	uc009mub.1	0	ENSMUSG00000031737	Irx5	Iroquois homeobox 5	uc009mub.1;uc009mua.3;uc033jgt.1	54352;71296;71296	0;0;0
chr1	69094050	69120760	26711	*	9.8	9.48	10.06	-0.58	8.96e-12	2.44e-10	727.35	700.4	1075	1056.73	Promoter (<=1kb)	1	68032186	69108059	1075874	2	13869	uc007bjb.3	0	ENSMUSG00000062209	Erbb4	erb-b2 receptor tyrosine kinase 4	uc007bjb.3	13869	0
chr8	17523079	17542362	19284	*	9.51	9.14	9.8	-0.66	9.45e-12	2.56e-10	588.68	539.53	852	930.23	Promoter (<=1kb)	8	15892545	17535385	1642841	2	94109	uc009kzp.1	0	ENSMUSG00000060924	Csmd1	CUB and Sushi multiple domains 1	uc009kzp.1;uc009kzq.1;uc009kzr.1	94109;94109;94109	0;0;0
chr7	19810324	19815305	4982	*	7.39	7.9	6.59	1.31	9.79e-12	2.65e-10	239.34	238.37	88	105.09	Promoter (<=1kb)	7	19808462	19811134	2673	2	12051	uc009fnj.1	0	ENSMUSG00000053175	Bcl3	B cell leukemia/lymphoma 3	uc009fnj.1;uc009fnk.2	12051;12051	0;0
chr1	155062308	155111218	48911	*	10.65	10.4	10.86	-0.46	1e-11	2.7e-10	1384.7	1320.37	1861	1861.44	Promoter (<=1kb)	1	155096367	155099636	3270	2	15939	uc007dax.2	0	ENSMUSG00000056708	Ier5	immediate early response 5	uc007dax.2;uc007daw.1	15939;671336	0;0
chr15	31355604	31373483	17880	*	9.45	9.09	9.73	-0.63	1.01e-11	2.71e-10	539.35	553.26	849	846.55	Promoter (<=1kb)	15	31291479	31367759	76281	2	67434	uc007vkd.3	0	ENSMUSG00000022237	Ankrd33b	ankyrin repeat domain 33B	uc007vkd.3;uc007vke.3;uc011zru.2;uc011zrv.2;uc007vkf.2	67434;67434;67434;67434;67434	0;0;0;0;0
chr14	32590695	32608396	17702	*	9.54	9.18	9.83	-0.65	1.13e-11	3.04e-10	604.01	556.2	870	949.7	Promoter (<=1kb)	14	32599408	32629000	29593	1	107751	uc011zin.2	0	ENSMUSG00000041730	Prrxl1	paired related homeobox protein-like 1	uc011zin.2;uc011zio.1;uc007szf.1;uc057kry.1;uc011zip.1	107751;107751;107751;107751;107751	0;0;0;0;0
chr9	119556725	119589887	33163	*	10.43	10.15	10.67	-0.52	1.24e-11	3.31e-10	1136.03	1133.98	1532	1732.03	Promoter (<=1kb)	9	119483408	119562678	79271	2	20271	uc009sbe.2	0	ENSMUSG00000032511	Scn5a	sodium channel, voltage-gated, type V, alpha	uc009sbe.2;uc009sbc.2;uc012hcm.2;uc057cen.1	20271;20271;20271;20271	0;0;-4650;-4650
chr9	23205071	23227346	22276	*	9.68	9.34	9.94	-0.6	1.31e-11	3.51e-10	660.68	639.58	958	1011.97	Promoter (<=1kb)	9	23223076	23485215	262140	1	73230	uc009oow.2	0	ENSMUSG00000031963	Bmper	BMP-binding endothelial regulator	uc009oow.2	73230	0
chr16	34561579	34580184	18606	*	9.64	9.29	9.92	-0.63	1.35e-11	3.59e-10	638.68	613.1	915	1018.78	Distal Intergenic	16	34152025	34514027	362003	2	545156	uc007zax.2	-47552	ENSMUSG00000061751	Kalrn	kalirin, RhoGEF kinase	NA	NA	NA
chr12	5365634	5380585	14952	*	9.33	8.93	9.64	-0.71	1.37e-11	3.64e-10	499.34	478.71	737	861.15	Promoter (<=1kb)	12	5077465	5375682	298218	2	208439	uc007myw.4	0	ENSMUSG00000020627	Klhl29	kelch-like 29	uc007myw.4;uc011yka.2	208439;72669	0;0
chr9	99848731	99922637	73907	*	11.38	11.17	11.57	-0.4	1.4e-11	3.71e-10	2306.72	2299.36	2893	3184.79	Promoter (<=1kb)	9	99874106	99876170	2065	2	20669	uc012gzb.1	0	ENSMUSG00000053747	Sox14	SRY (sex determining region Y)-box 14	uc012gzb.1	20669	0
chr2	30225835	30234690	8856	*	8.18	8.6	7.6	1	1.41e-11	3.74e-10	421.34	354.12	198	189.74	Promoter (2-3kb)	2	30237197	30237631	435	2	67350	uc008jbt.2	2941	NA	1700084E18Rik	RIKEN cDNA 1700084E18 gene	uc008jbu.2;uc008jbt.2	241296;67350	-3079;2941
chr7	36672464	36704187	31724	*	10.21	9.91	10.46	-0.55	1.51e-11	3.98e-10	990.69	939.76	1334	1488.76	Promoter (<=1kb)	7	36698118	36773457	75340	1	243931	uc009gkj.1	0	ENSMUSG00000021217	Tshz3	teashirt zinc finger family member 3	uc009gkj.1	243931	0
chrX	105757954	105768082	10129	*	8.21	7.66	8.6	-0.94	1.61e-11	4.24e-10	208	196.19	380	397	Promoter (<=1kb)	20	105764477	105776532	12056	1	80903	uc009uba.1	0	ENSMUSG00000031230	Fgf16	fibroblast growth factor 16	uc009uba.1	80903	0
chr2	130573574	130590516	16943	*	9.46	9.1	9.74	-0.64	1.76e-11	4.62e-10	570.68	527.75	848	864.07	Promoter (<=1kb)	2	130580620	130582588	1969	2	11998	uc008mjh.2	0	ENSMUSG00000037727	Avp	arginine vasopressin	uc008mjh.2;uc008mji.3;uc008mjj.3;uc008mjk.3;uc008mjg.3	11998;140629;140629;140629;18429	0;0;0;0;0
chr4_GL456216_random	26514	40888	14375	*	8.71	9.06	8.26	0.8	1.9e-11	4.96e-10	552.01	515	313	298.73	3' UTR	28	15881	36213	20333	1	236082	uc009vdc.1	10633	ENSMUSG00000063897	Dhrsx	dehydrogenase/reductase (SDR family) X chromosome	uc009vdc.1	236082	0
chr12	20891403	20905207	13805	*	8.47	8.84	7.97	0.88	1.9e-11	4.96e-10	482.68	436.53	246	254.94	Intron (uc029rrg.3/uc029rrg.3, intron 3 of 3)	12	20804389	20815779	11391	2	69513	uc007nde.3	-75624	ENSMUSG00000099759	1700030C10Rik	RIKEN cDNA 1700030C10 gene	NA	NA	NA
chr2	172930470	172951214	20745	*	9.57	9.23	9.84	-0.61	2.1e-11	5.48e-10	588.01	616.04	897	938.02	Promoter (<=1kb)	2	172868012	172940321	72310	2	12162	uc008odb.3	0	ENSMUSG00000008999	Bmp7	bone morphogenetic protein 7	uc008odb.3;uc008odc.2	12162;12162	0;0
chr18	84078135	84094117	15983	*	9.23	8.83	9.54	-0.71	2.33e-11	6.07e-10	424.68	486.55	711	776.49	Promoter (<=1kb)	18	84011627	84086390	74764	2	110796	uc008ful.1	0	ENSMUSG00000046982	Tshz1	teashirt zinc finger family member 1	uc008ful.1;uc008fum.1;uc008fun.1	110796;110796;225791	0;0;0
chr11	116513869	116535202	21334	*	9.78	9.45	10.05	-0.6	2.35e-11	6.09e-10	672.02	728.85	1010	1106.36	Promoter (<=1kb)	11	116531911	116536675	4765	1	20698	uc007mlg.2	0	ENSMUSG00000061878	Sphk1	sphingosine kinase 1	uc007mlg.2;uc007mlh.2;uc007mli.2;uc007mlj.2;uc007mlk.1;uc007mll.2;uc007mlm.1;uc007mln.1	20698;20698;20698;20698;20698;20698;217342;217342	0;0;0;0;0;0;8818;46245
chr5	143245594	143260305	14712	*	9.27	8.87	9.58	-0.71	2.37e-11	6.13e-10	452.68	483.61	707	824.17	3' UTR	5	143235163	143248834	13672	1	231866	uc009ajt.2	10431	ENSMUSG00000029587	Zfp12	zinc finger protein 12	uc009ajt.2;uc009aju.2;uc009ajv.2;uc009ajw.2	231866;231866;231866;54201	0;0;0;0
chr5	109877303	109900434	23132	*	9.14	9.45	8.75	0.69	2.42e-11	6.25e-10	706.02	688.63	417	444.68	Distal Intergenic	5	109933563	109941710	8148	1	100642166	uc008ypl.1	-33129	ENSMUSG00000090015	Gm15446	predicted gene 15446	NA	NA	NA
chr6	38631916	38650168	18253	*	9.5	9.15	9.79	-0.63	2.51e-11	6.46e-10	540.68	596.42	855	909.8	Promoter (<=1kb)	6	38626660	38637239	10580	2	74253	uc009bkv.1	0	ENSMUSG00000071537	Klrg2	killer cell lectin-like receptor subfamily G, member 2	uc009bkv.1;uc012eke.1	74253;74253	0;0
chr4	145403159	145500875	97717	*	12.82	12.93	12.7	0.23	2.72e-11	6.98e-10	7808.18	7785.84	6789	6544.73	Promoter (<=1kb)	4	145464210	145467961	3752	1	545700	uc008vrx.1	0	ENSMUSG00000052912	Smarca5-ps	SWI/SNF related, matrix associated, actin depenent ragulator of chromatin, subfamily a, member 5, pseudogene	uc008vrx.1	545700	0
chr11	5889836	5914474	24639	*	9.92	9.62	10.17	-0.55	2.72e-11	6.98e-10	786.02	787.71	1113	1194.9	Promoter (<=1kb)	11	5896637	5898782	2146	2	17898	uc007hxl.1	0	ENSMUSG00000020469	Myl7	myosin, light polypeptide 7, regulatory	uc033ftt.2;uc007hxn.3;uc007hxo.2;uc007hxl.1	103988;103988;103988;17898	0;0;0;0
chr19	39889255	39916559	27305	*	9.16	9.47	8.75	0.72	2.79e-11	7.15e-10	715.35	707.27	467	396.03	Promoter (2-3kb)	19	39842660	39886769	44110	2	100043108	uc012blm.2	-2486	ENSMUSG00000092008	Cyp2c69	cytochrome P450, family 2, subfamily c, polypeptide 69	uc009vby.1;uc012blm.2	100043108;100043108	-2486;-2486
chr9	32521140	32571035	49896	*	10.67	10.41	10.89	-0.48	2.84e-11	7.24e-10	1356.03	1369.41	1794	2013.24	Promoter (<=1kb)	9	32422204	32541452	119249	2	14247	uc009orz.2	0	ENSMUSG00000016087	Fli1	Friend leukemia integration 1	uc009orz.2	14247	0
chr2	148021409	148067414	46006	*	11.08	10.69	11.38	-0.69	2.86e-11	7.29e-10	1721.37	1584.24	2500	2837.41	Promoter (<=1kb)	2	148042877	148045464	2588	2	15376	uc056zpw.1	0	ENSMUSG00000037025	Foxa2	forkhead box A2	uc056zpw.1;uc008mta.2;uc008mtb.2	15376;15376;15376	0;0;0
chr11	115304860	115345420	40561	*	10.31	10.05	10.54	-0.49	2.9e-11	7.36e-10	1054.02	1064.34	1452	1524.77	Promoter (<=1kb)	11	115315192	115321918	6727	2	16470	uc007mhc.1	0	ENSMUSG00000045288	Ush1g	USH1 protein network component sans	uc007mhc.1;uc007mhg.1;uc007mhh.1;uc007mhb.1;uc007mhd.1;uc007mhe.1;uc007mhf.1	16470;217310;217310;237987;237987;69602;69602	0;0;0;0;0;0;0
chr11	95112170	95128892	16723	*	9.33	8.97	9.62	-0.64	2.91e-11	7.38e-10	506.68	498.33	780	789.14	Promoter (<=1kb)	11	95120117	95125293	5177	1	13393	uc007kzy.3	0	ENSMUSG00000001510	Dlx3	distal-less homeobox 3	uc007kzy.3	13393	0
chr19	4206203	4229371	23169	*	9.44	9.09	9.72	-0.63	2.94e-11	7.43e-10	537.35	551.3	814	871.85	Promoter (<=1kb)	19	4214238	4233634	19397	1	105948585	uc057bla.1	0	NA	Gm45928	predicted gene, 45928	uc057bla.1;uc057blb.1;uc008fzh.1;uc008fzl.2;uc008fzj.2;uc008fzk.2;uc057blc.1;uc008fzm.3;uc008fzn.3	105948585;105948585;19367;56708;56708;56708;56708;69745;69745	0;0;-4600;0;0;0;0;-2522;-3044
chr7	128407202	128429164	21963	*	9.65	9.3	9.93	-0.62	2.96e-11	7.46e-10	638.01	624.87	910	1035.32	Promoter (<=1kb)	7	128373625	128418172	44548	2	67865	uc009jyw.1	0	ENSMUSG00000030844	Rgs10	regulator of G-protein signalling 10	uc009jyw.1;uc009jyx.1	67865;67865	0;0
chr11	101152159	101181406	29248	*	10.29	9.99	10.53	-0.54	3.08e-11	7.76e-10	1058.02	979.97	1401	1555.9	Promoter (<=1kb)	11	101155884	101161787	5904	1	103768	uc007lnm.2	0	ENSMUSG00000045007	Tubg2	tubulin, gamma 2	uc007lnm.2;uc007lnn.1;uc007lns.1;uc007lno.3;uc007lnp.3;uc007lnq.3;uc007lnr.3;uc007lnt.1	103768;103768;12777;217198;217198;217198;217198;53321	0;0;0;0;0;0;0;0
chr18	63382917	63391922	9006	*	8.75	8.3	9.1	-0.8	3.17e-11	7.94e-10	312.01	318.81	512	582.86	Promoter (<=1kb)	18	63010213	63387183	376971	2	667742	uc012bea.2	0	ENSMUSG00000041482	Piezo2	piezo-type mechanosensitive ion channel component 2	uc012bea.2;uc057kzy.1;uc029tni.1;uc008fdw.1	667742;667742;667742;667742	0;0;0;0
chr12	86205261	86229595	24335	*	9.72	9.41	9.98	-0.57	3.17e-11	7.94e-10	674.68	684.71	1000	1017.81	Distal Intergenic	12	86241858	86291785	49928	1	70373	uc007ohr.2	-12263	ENSMUSG00000021254	Gpatch2l	G patch domain containing 2 like	NA	NA	NA
chr2	127331168	127369078	37911	*	10.29	10.02	10.52	-0.5	3.22e-11	8.05e-10	1030.69	1047.66	1424	1505.31	Promoter (<=1kb)	2	127363286	127367221	3936	1	11552	uc008mfi.1	0	ENSMUSG00000058620	Adra2b	adrenergic receptor, alpha 2b	uc008mfi.1;uc008mff.1;uc008mfg.3;uc008mfh.4;uc029uen.3	11552;13537;215095;215095;215095	0;0;0;0;0
chr2	180329613	180341164	11552	*	8.99	8.56	9.32	-0.76	3.25e-11	8.12e-10	355.34	400.23	597	683.08	Promoter (<=1kb)	2	180332857	180340732	7876	1	100036520	uc029ujg.3	0	ENSMUSG00000056061	Gata5os	GATA binding protein 5, opposite strand	uc029ujg.3;uc008oix.2;uc012cma.1	100036520;14464;14464	0;0;0
chr17	56469727	56515662	45936	*	10.7	10.47	10.9	-0.44	3.29e-11	8.18e-10	1400.03	1435.14	1931	1902.31	Promoter (<=1kb)	17	56412426	56476480	64055	2	19280	uc008dby.2	0	ENSMUSG00000013236	Ptprs	protein tyrosine phosphatase, receptor type, S	uc008dby.2;uc008dbz.2;uc008dca.2;uc008dcb.2;uc008dcc.2;uc008dcd.2;uc008dce.1	19280;19280;19280;19280;19280;19280;20834	0;0;0;0;0;0;0
chr1	167677487	167716180	38694	*	10.47	10.22	10.69	-0.47	3.35e-11	8.33e-10	1203.36	1186.96	1623	1679.48	Promoter (<=1kb)	1	167689558	167848733	159176	1	110648	uc007dlc.1	0	ENSMUSG00000026686	Lmx1a	LIM homeobox transcription factor 1 alpha	uc007dlc.1	110648	0
chr19	5736988	5758365	21378	*	9.65	9.32	9.92	-0.61	3.5e-11	8.68e-10	638.68	636.64	919	1023.65	Promoter (<=1kb)	19	5740904	5754330	13427	1	16998	uc008gfe.1	0	ENSMUSG00000024940	Ltbp3	latent transforming growth factor beta binding protein 3	uc008gfe.1;uc008gff.1;uc008gfg.1;uc008gfh.1;uc008gfi.1;uc012bhd.1	16998;16998;16998;78891;78891;78891	0;0;0;13036;13036;13036
chr8	102372251	102887262	515012	*	14.05	13.96	14.14	-0.18	3.68e-11	9.1e-10	16011.7	15915	17725	18354.6	Promoter (<=1kb)	8	102632095	102785111	153017	2	12552	uc009mzu.2	0	ENSMUSG00000031673	Cdh11	cadherin 11	uc009mzu.2;uc009mzv.1	12552;12552	0;0
chr17	68827001	68851873	24873	*	9.73	9.39	10	-0.61	3.72e-11	9.17e-10	685.35	660.18	961	1090.79	Promoter (<=1kb)	17	68837136	68843138	6003	1	622645	uc029tkm.1	0	ENSMUSG00000095407	Tmem200c	transmembrane protein 200C	uc029tkm.1	622645	0
chr8	105252617	105311597	58981	*	11.38	11.18	11.56	-0.37	3.87e-11	9.52e-10	2290.72	2359.2	2913	3115.7	Promoter (<=1kb)	8	105297663	105305370	7708	1	104394	uc009ncl.1	0	ENSMUSG00000014859	E2f4	E2F transcription factor 4	uc009ncl.1;uc009nbt.3;uc009nbu.3;uc009nbv.3;uc009nbw.1;uc009ncm.2;uc009ncn.2;uc012gjh.1;uc009nco.2;uc009ncp.1;uc009ncq.1;uc009nca.2;uc009ncb.2;uc009ncc.2;uc012gjg.2;uc009nci.1;uc009ncj.1;uc009nbz.2;uc012gjf.1;uc009nby.1;uc012gji.1;uc009ncf.1;uc009nce.2;uc	104394;234678;234678;234678;234678;234683;234683;234683;234683;234684;234684;26386;26386;26386;26386;277978;277978;50788;50788;71609;723841;74356;74356;74356;74356;78688;97440;97440	0;0;0;0;3874;0;0;0;0;14679;14679;0;0;0;0;0;0;0;0;0;0;0;0;0;0;0;0;0
chr9	30916550	30946375	29826	*	10.02	9.73	10.26	-0.52	3.9e-11	9.58e-10	839.35	861.28	1202	1244.53	Promoter (<=1kb)	9	30899155	30922452	23298	2	235130	uc009oqz.1	0	ENSMUSG00000033453	Adamts15	a disintegrin-like and metallopeptidase (reprolysin type) with thrombospondin type 1 motif, 15	uc009oqz.1;uc009ora.2;uc012gpt.2	235130;30806;30806	0;0;0
chr7	40890671	40905902	15232	*	9.28	8.89	9.58	-0.69	3.98e-11	9.75e-10	503.34	446.33	739	790.12	Promoter (<=1kb)	7	40849153	40898324	49172	2	320210	uc009glg.2	0	ENSMUSG00000100600	A230077H06Rik	RIKEN cDNA A230077H06 gene	uc009glg.2;uc009glh.1	320210;58188	0;0
chr1	12586016	12612598	26583	*	9.45	9.74	9.1	0.64	4.02e-11	9.83e-10	831.35	875.99	573	522.53	Distal Intergenic	1	12667563	12673090	5528	1	329096	uc029qmx.1	-54965	ENSMUSG00000097171	Gm17644	predicted gene, 17644	NA	NA	NA
chr14	34810140	34832401	22262	*	9.9	9.58	10.17	-0.58	4.11e-11	1e-09	760.68	773.97	1072	1227.01	Promoter (<=1kb)	14	34820136	35581115	760980	1	14803	uc007tbj.1	0	ENSMUSG00000041078	Grid1	glutamate receptor, ionotropic, delta 1	uc007tbj.1	14803	0
chr5	33539667	33597607	57941	*	10.95	10.74	11.14	-0.41	4.23e-11	1.03e-09	1673.37	1739.23	2232	2294.45	Downstream (2-3kb)	5	33600353	33629635	29283	2	74504	uc008xat.2	32028	ENSMUSG00000037339	Fam53a	family with sequence similarity 53, member A	uc008xat.2;uc012dus.1	74504;74504	32028;32028
chr14	118170548	118266651	96104	*	11.8	11.63	11.95	-0.32	4.3e-11	1.04e-09	3212.74	3122.38	3867	4066.37	Promoter (<=1kb)	14	118258634	118258736	103	1	102465149	uc033gsr.1	0	ENSMUSG00000098612	Mir6241	microRNA 6241	uc033gsr.1;uc007uyu.1;uc057bfo.1;uc007uyt.3;uc011zpy.2	102465149;105245869;105245869;223227;668814	0;0;0;0;-507
chr14	23996246	24012232	15987	*	9.18	8.81	9.47	-0.67	4.37e-11	1.06e-09	445.34	450.26	713	707.41	Promoter (<=1kb)	14	23298694	24004205	705512	2	16531	uc007sme.3	0	ENSMUSG00000063142	Kcnma1	potassium large conductance calcium-activated channel, subfamily M, alpha member 1	uc007sme.3;uc007smg.2;uc007smh.2;uc007smi.2;uc011zgw.2;uc011zgx.2;uc011zgy.2;uc011zgz.2;uc011zha.2;uc011zhc.2;uc011zhd.2;uc011zhe.2;uc057krj.1;uc057krk.1;uc057krl.1;uc057krm.1;uc057krn.1;uc057kro.1;uc011zhf.2;uc011zhg.2;uc011zhh.2;uc011zhi.2;uc011zhj.2;uc	16531;16531;16531;16531;16531;16531;16531;16531;16531;16531;16531;16531;16531;16531;16531;16531;16531;16531;16531;16531;16531;16531;16531;16531;78019	0;0;0;0;0;0;0;0;0;0;0;0;0;0;0;0;0;0;0;0;0;0;0;0;0
chr9	58182793	58209341	26549	*	10.08	9.79	10.32	-0.53	4.46e-11	1.08e-09	842.02	929.95	1295	1267.88	Promoter (<=1kb)	9	58196297	58201715	5419	2	320563	uc009pwl.1	0	ENSMUSG00000051243	Islr2	immunoglobulin superfamily containing leucine-rich repeat 2	uc009pwl.1;uc012guf.1;uc012gug.1;uc009pwm.2;uc012guh.1;uc012gui.1;uc012guj.1;uc012guk.1;uc012gul.1	320563;320563;320563;320563;320563;320563;320563;320563;665268	0;0;0;0;0;0;0;0;0
chr10	78360291	78397799	37509	*	10.47	10.21	10.68	-0.47	4.5e-11	1.09e-09	1211.36	1163.41	1623	1660.99	Exon (uc033fqp.1/uc033fqp.1, exon 1 of 1)	10	78274072	78352442	78371	2	28169	uc007fxr.1	-7849	ENSMUSG00000001211	Agpat3	1-acylglycerol-3-phosphate O-acyltransferase 3	uc007fxs.1;uc011xht.1	18114;18114	15244;15244
chr12	109042283	109058956	16674	*	9.11	8.7	9.42	-0.73	5.07e-11	1.22e-09	413.34	417.89	633	741.46	Exon (uc007pal.1/380785, exon 2 of 7)	12	109032182	109068217	36036	2	380785	uc007pal.1	9261	ENSMUSG00000040867	Begain	brain-enriched guanylate kinase-associated	uc007pal.1	380785	0
chr9	78435427	78447781	12355	*	9.07	8.68	9.38	-0.69	5.1e-11	1.22e-09	420.68	402.19	660	668.48	Promoter (<=1kb)	9	78430518	78443237	12720	2	214763	uc009quj.2	0	ENSMUSG00000032344	Cgas	cyclic GMP-AMP synthase	uc009quj.2;uc009quk.2;uc009qul.2;uc009qum.2	214763;214763;68291;68291	0;0;-429;-429
chr11	97107392	97119760	12369	*	9.09	8.68	9.41	-0.73	5.38e-11	1.29e-09	394.68	423.77	627	731.73	Promoter (<=1kb)	11	97098007	97115331	17325	2	57765	uc007ldr.2	0	ENSMUSG00000001444	Tbx21	T-box 21	uc007ldr.2	57765	0
chr2	90872396	90891398	19003	*	9.71	9.38	9.97	-0.59	5.47e-11	1.31e-09	652.02	682.74	957	1047.97	Promoter (<=1kb)	2	90885786	90890526	4741	1	67445	uc008ktq.1	0	ENSMUSG00000040794	C1qtnf4	C1q and tumor necrosis factor related protein 4	uc008ktq.1;uc008ktr.1	67445;68349	0;13323
chr5	118154519	118176409	21891	*	9.64	9.32	9.91	-0.59	5.6e-11	1.33e-09	659.35	617.02	941	981.81	Promoter (<=1kb)	5	118169764	118189478	19715	1	12123	uc008zgg.1	0	ENSMUSG00000046607	Hrk	harakiri, BCL2 interacting protein (contains only BH3 domain)	uc008zgg.1;uc008zge.1;uc008zgf.1	12123;231672;231672	0;0;0
chr15	91568669	91574058	5390	*	7.9	7.31	8.33	-1.02	5.63e-11	1.34e-09	163.34	153.03	310	331.81	Promoter (<=1kb)	15	91267691	91573261	305571	2	239606	uc007xhy.2	0	ENSMUSG00000036298	Slc2a13	solute carrier family 2 (facilitated glucose transporter), member 13	uc007xhy.2	239606	0
chr10	114796899	114813829	16931	*	9.43	9.08	9.71	-0.63	5.7e-11	1.35e-09	552.01	527.75	802	874.77	Promoter (<=1kb)	10	114398821	114801370	402550	2	237553	uc007hat.2	0	ENSMUSG00000050663	Trhde	TRH-degrading enzyme	uc007hat.2;uc007hau.2;uc007hav.2	237553;237553;237553	0;0;0
chr8	4200026	4232477	32452	*	10.09	9.82	10.32	-0.51	5.72e-11	1.36e-09	909.35	894.63	1290	1274.69	Promoter (<=1kb)	8	4203375	4206783	3409	1	213027	uc009kte.2	0	ENSMUSG00000011832	Evi5l	ecotropic viral integration site 5 like	uc009ktc.1;uc012fza.2;uc009kte.2;uc009ktf.1;uc009kth.2;uc012fzb.1	213027;213027;213027;213027;72267;73072	0;0;0;0;0;0
chr16	63846816	63890329	43514	*	10.43	10.18	10.65	-0.46	6.12e-11	1.45e-09	1146.03	1179.11	1584	1622.07	Promoter (<=1kb)	16	63545218	63864157	318940	2	13837	uc007zpy.1	0	ENSMUSG00000052504	Epha3	Eph receptor A3	uc007zpy.1;uc012agz.1;uc007zpz.1	13837;13837;13837	0;0;0
chr9	58814322	58833904	19583	*	9.45	9.08	9.75	-0.67	6.29e-11	1.48e-09	574.01	505.19	809	911.75	Promoter (<=1kb)	9	58823512	58860955	37444	1	330953	uc009pxi.1	0	ENSMUSG00000032338	Hcn4	hyperpolarization-activated, cyclic nucleotide-gated K+ 4	uc009pxi.1	330953	0
chr15	102741135	102772438	31304	*	10.09	9.82	10.32	-0.51	6.48e-11	1.52e-09	898.02	908.36	1298	1266.91	Promoter (<=1kb)	15	102746441	102746909	469	2	102216269	uc033gxb.1	0	NA	Gm38436	predicted gene, 38436	uc033gxb.1	102216269	0
chr5	32128334	32143242	14909	*	9.25	8.88	9.55	-0.66	6.53e-11	1.53e-09	445.34	499.31	739	757.03	Promoter (<=1kb)	5	32136472	32157840	21369	1	14284	uc008wzi.3	0	ENSMUSG00000029135	Fosl2	fos-like antigen 2	uc008wzi.3;uc008wzj.2	14284;14284	0;0
chr11	59172070	59180601	8532	*	8.43	7.95	8.79	-0.84	6.62e-11	1.55e-09	250.01	244.26	441	443.71	Promoter (2-3kb)	11	59175564	59182826	7263	2	118454	uc007jde.2	2225	ENSMUSG00000043448	Gjc2	gap junction protein, gamma 2	uc007jde.2;uc007jdf.2;uc011xvm.1;uc007jdg.2	118454;118454;14923;14923	0;0;7140;11351
chr14	32450925	32478546	27622	*	9.95	9.66	10.19	-0.54	6.69e-11	1.56e-09	803.35	811.25	1132	1207.55	Promoter (<=1kb)	14	32408203	32465909	57707	2	12647	uc007syv.1	0	ENSMUSG00000021919	Chat	choline acetyltransferase	uc007syv.1;uc007syw.1;uc011zil.1;uc007syx.1;uc007syy.1;uc011zim.1;uc007syz.1;uc007sza.1;uc007szb.1	12647;12647;12647;12647;12647;12647;12647;12647;20508	0;0;0;0;0;0;0;0;0
chr1	19075916	19122300	46385	*	10.65	10.41	10.86	-0.46	6.82e-11	1.59e-09	1346.7	1368.43	1783	1943.18	Promoter (<=1kb)	1	19103022	19166338	63317	1	226896	uc007akp.2	0	ENSMUSG00000042596	Tfap2d	transcription factor AP-2, delta	uc007akp.2	226896	0
chr5	145620332	145693018	72687	*	11.77	11.91	11.6	0.31	6.86e-11	1.6e-09	3893.42	3816.9	3115	3104.03	Downstream (1-2kb)	5	145694049	145720136	26088	2	53973	uc057lon.1	27118	ENSMUSG00000075551	Cyp3a41a	cytochrome P450, family 3, subfamily a, polypeptide 41A	uc057lon.1	53973	27118
chr18	76832916	76868820	35905	*	10.82	10.37	11.17	-0.8	6.95e-11	1.62e-09	1334.7	1304.67	2098	2504.63	Promoter (<=1kb)	18	76856405	76900342	43938	1	664805	uc008fqq.1	0	ENSMUSG00000091519	Skor2	SKI family transcriptional corepressor 2	uc008fqq.1	664805	0
chr15	27986604	28136551	149948	*	12.22	12.07	12.35	-0.28	7.09e-11	1.64e-09	4360.1	4267.16	5110	5338.14	Promoter (<=1kb)	15	27730649	28025848	295200	2	223435	uc007vjw.1	0	ENSMUSG00000022263	Trio	triple functional domain (PTPRF interacting)	uc007vjw.1	223435	0
chr2	150190186	150206912	16727	*	8.71	9.05	8.28	0.77	7.15e-11	1.65e-09	530.01	526.77	314	305.54	3' UTR	2	150181755	150193279	11525	1	100271882	uc012cfr.1	8431	ENSMUSG00000079009	Gm14139	predicted gene 14139	uc012cfr.1	100271882	0
chr15	79493530	79522970	29441	*	10.14	9.85	10.38	-0.53	7.15e-11	1.65e-09	926.69	920.14	1262	1396.32	Promoter (<=1kb)	15	79516408	79527739	11332	1	105785	uc007wto.2	0	ENSMUSG00000010830	Kdelr3	KDEL (Lys-Asp-Glu-Leu) endoplasmic reticulum protein retention receptor 3	uc007wto.2;uc007wtn.2;uc007wtp.1;uc007wtq.1;uc007wtr.1	105785;16520;67040;67040;67040	0;0;9947;23771;23771
chr18	86703873	86721087	17215	*	9.34	8.99	9.63	-0.64	7.16e-11	1.65e-09	506.01	511.08	760	823.2	Promoter (<=1kb)	18	86711110	86718283	7174	1	12405	uc008fva.1	0	ENSMUSG00000024647	Cbln2	cerebellin 2 precursor protein	uc008fva.1;uc008fvb.1;uc008fvc.2	12405;12405;12405	0;0;0
chr4	97770895	97788225	17331	*	9.44	9.08	9.72	-0.64	7.2e-11	1.66e-09	551.35	533.64	798	888.39	Promoter (<=1kb)	4	97772672	98118876	346205	1	18027	uc008tts.2	0	ENSMUSG00000028565	Nfia	nuclear factor I/A	uc008tty.2;uc008tts.2;uc008ttt.2;uc008ttu.2;uc008ttv.2;uc008ttw.2;uc008ttp.1	18027;18027;18027;18027;18027;18027;319865	0;0;0;0;0;0;0
chr12	117141426	117177595	36170	*	10.46	10.19	10.69	-0.51	7.22e-11	1.66e-09	1209.36	1120.25	1569	1739.81	Promoter (<=1kb)	12	117144523	117151269	6747	2	100038689	uc007phz.2	0	ENSMUSG00000099907	Gm10421	predicted gene 10421	uc007phz.2;uc007phx.2;uc011yvq.1	100038689;19276;19276	0;0;0
chr12	98565144	98586227	21084	*	9.71	9.39	9.98	-0.59	7.4e-11	1.7e-09	683.35	659.2	958	1059.65	Promoter (<=1kb)	12	98429437	98574712	145276	2	72258	uc007oqg.2	0	ENSMUSG00000033854	Kcnk10	potassium channel, subfamily K, member 10	uc007oqg.2;uc007oqh.2;uc007oqi.2;uc057bck.1	72258;72258;72258;72258	0;0;0;0
chr7	100003560	100024661	21102	*	9.39	9.03	9.67	-0.64	7.49e-11	1.71e-09	537.35	509.12	782	846.55	Promoter (<=1kb)	7	100006404	100034726	28323	1	69121	uc009imi.2	0	ENSMUSG00000030732	Chrdl2	chordin-like 2	uc009imi.2;uc057ain.1	69121;69121	0;0
chr12	107992421	108011346	18926	*	9.36	9.01	9.63	-0.63	7.71e-11	1.76e-09	502.01	527.75	783	806.66	Promoter (<=1kb)	12	107910403	108003414	93012	2	58208	uc007ozh.1	0	ENSMUSG00000048251	Bcl11b	B cell leukemia/lymphoma 11B	uc007ozh.1;uc007ozi.1;uc011yrp.1	58208;58208;58208	0;0;0
chr2	164380770	164417640	36871	*	10.39	10.11	10.62	-0.51	8.14e-11	1.85e-09	1153.36	1063.36	1506	1641.53	Promoter (<=1kb)	2	164389393	164404818	15426	2	17183	uc008num.3	0	ENSMUSG00000016995	Matn4	matrilin 4	uc008num.3;uc029uia.1;uc008nun.3;uc008nuo.1;uc008nup.1	17183;17183;17183;19668;19668	0;0;0;0;0
chr10	19326319	19365715	39397	*	10.41	10.14	10.63	-0.49	8.55e-11	1.94e-09	1170.69	1091.8	1539	1630.83	Promoter (<=1kb)	10	19356539	19358604	2066	1	94222	uc007ene.1	0	ENSMUSG00000045591	Olig3	oligodendrocyte transcription factor 3	uc007ene.1	94222	0
chr4	147729672	147827042	97371	*	11.48	11.64	11.29	0.35	8.61e-11	1.95e-09	3219.41	3155.73	2564	2448.19	Promoter (<=1kb)	4	147753974	147809788	55815	2	100041677	uc012dpf.2	0	ENSMUSG00000078495	Zfp984	zinc finger protein 984	uc012dpf.2;uc008vtb.3;uc008vtc.1;uc012dph.1;uc012dpg.1	100041677;100041677;242747;242747;277692	0;0;0;0;0
chr18	23032072	23052807	20736	*	9.66	9.33	9.92	-0.6	8.68e-11	1.96e-09	666.02	618	931	1011.97	Promoter (<=1kb)	18	22693155	23038663	345509	2	319211	uc008efq.2	0	ENSMUSG00000041923	Nol4	nucleolar protein 4	uc008efq.2;uc008efr.2;uc057kzi.1;uc057kzj.1	319211;319211;319211;319211	0;0;0;0
chr11	11108654	11122852	14199	*	9.52	9.17	9.79	-0.62	9.13e-11	2.06e-09	576.68	578.76	836	939.96	Promoter (<=1kb)	11	11114016	11263526	149511	1	319922	uc007iac.1	0	ENSMUSG00000050830	Vwc2	von Willebrand factor C domain containing 2	uc007iac.1;uc007iad.2	319922;319922	0;0
chr4	133478364	133507630	29267	*	9.84	9.55	10.09	-0.54	9.49e-11	2.14e-09	729.35	768.09	1073	1107.33	Promoter (<=1kb)	4	133480133	133487940	7808	1	100342	uc008vct.2	0	ENSMUSG00000046694	Tent5b	terminal nucleotidyltransferase 5B	uc008vct.2;uc008vcu.1	100342;69539	0;0
chr14	57087542	57118907	31366	*	9.92	9.63	10.16	-0.53	9.81e-11	2.2e-09	769.35	813.21	1124	1164.74	Promoter (<=1kb)	14	57098602	57104702	6101	2	14619	uc007ucx.2	0	ENSMUSG00000046352	Gjb2	gap junction protein, beta 2	uc007ucx.2;uc007ucy.2;uc033grf.1	14619;14623;14623	0;0;0
chr14	84435299	84485121	49823	*	10.95	10.72	11.14	-0.41	1.02e-10	2.29e-09	1720.04	1660.76	2179	2328.51	Promoter (<=1kb)	14	84443563	84479227	35665	1	219228	uc007uto.2	0	ENSMUSG00000035566	Pcdh17	protocadherin 17	uc007uto.2;uc007utp.2;uc007utq.1;uc007uts.2;uc007utt.2;uc007utu.2;uc007utv.2;uc007utw.2;uc011zpa.1	219228;219228;319903;319903;319903;319903;319903;319903;319903	0;0;0;0;0;0;0;0;0
chr18	13966290	13977412	11123	*	8.88	8.45	9.21	-0.76	1.06e-10	2.37e-09	364.68	332.54	553	629.56	Promoter (<=1kb)	18	13687013	13972733	285721	2	225207	uc008edd.3	0	ENSMUSG00000024420	Zfp521	zinc finger protein 521	uc008edd.3;uc008edc.1	225207;225207	0;0
chr12	109519737	109542447	22711	*	9.01	9.34	8.58	0.76	1.09e-10	2.43e-09	696.68	598.38	410	353.22	Promoter (<=1kb)	12	109540996	109545319	4324	1	17263	uc007pap.2	0	ENSMUSG00000021268	Meg3	maternally expressed 3	uc011ysa.1;uc007pap.2;uc007paq.4;uc007par.2;uc029rxy.3;uc007pat.2;uc007pau.4;uc011ysb.1	100316809;17263;17263;17263;17263;17263;17263;17263	-2094;0;0;0;0;-1580;-2951;-3983
chr3	45363567	45402575	39009	*	10.45	10.17	10.69	-0.51	1.1e-10	2.44e-09	1202.69	1108.48	1552	1747.6	Promoter (<=1kb)	3	45378398	45383035	4638	1	18526	uc012cpg.1	0	ENSMUSG00000049100	Pcdh10	protocadherin 10	uc012cpg.1;uc008pcy.1;uc008pcz.1;uc008pda.1;uc008pcx.2	18526;18526;18526;18526;72511	0;0;0;0;0
chr1	180328612	180350134	21523	*	9.5	9.18	9.77	-0.59	1.1e-10	2.44e-09	580.68	575.82	861	882.56	Promoter (<=1kb)	1	180326969	180330549	3581	2	277333	uc007dwf.1	0	NA	Gm5069	glyceraldehyde-3-phosphate dehydrogenase pseudogene	uc007dwf.1;uc007dwg.1	277333;320404	0;0
chr11	79707112	79715177	8066	*	8.56	8.1	8.91	-0.81	1.1e-10	2.45e-09	268.01	281.53	457	505.99	Promoter (<=1kb)	11	79711969	79712034	66	1	387188	uc011yan.1	0	ENSMUSG00000065395	Mir193a	microRNA 193a	uc011yan.1	387188	0
chr15	100265819	100282503	16685	*	8.84	9.16	8.42	0.74	1.12e-10	2.49e-09	570.01	574.84	356	330.84	Promoter (<=1kb)	15	100280837	100285667	4831	1	75002	uc007xqt.1	0	ENSMUSG00000045631	Tmprss12	transmembrane (C-terminal) protease, serine 12	uc007xqs.1;uc007xqt.1;uc007xqu.1	11908;75002;75002	37960;0;0
chr12	110180084	110195695	15612	*	9.36	9	9.65	-0.65	1.15e-10	2.53e-09	511.35	513.04	753	849.47	Distal Intergenic	12	110151654	110158073	6420	2	67280	uc007pbg.2	-22011	ENSMUSG00000113331	3110009F21Rik	RIKEN cDNA 3110009F21 gene	NA	NA	NA
chr17	3311166	3334166	23001	*	9.7	9.38	9.96	-0.58	1.19e-10	2.63e-09	698.68	635.66	982	1012.94	Promoter (<=1kb)	17	3326573	3519397	192825	1	24001	uc008aeo.1	0	ENSMUSG00000023800	Tiam2	T cell lymphoma invasion and metastasis 2	uc008aeo.1	24001	0
chr11	24057173	24119266	62094	*	10.93	10.71	11.12	-0.42	1.2e-10	2.64e-09	1668.04	1677.43	2143	2323.64	Promoter (<=1kb)	11	24078056	24090906	12851	1	14025	uc007ifs.2	0	ENSMUSG00000000861	Bcl11a	B cell CLL/lymphoma 11A (zinc finger protein)	uc007ifs.2;uc007ift.3;uc007ifu.2;uc007ifv.2;uc007ifw.2	14025;14025;14025;14025;14025	0;0;0;0;0
chr5	147714430	147738056	23627	*	9.88	9.54	10.15	-0.61	1.23e-10	2.69e-09	768.02	724.93	1039	1238.69	Promoter (<=1kb)	5	147562196	147725988	163793	2	14254	uc009aoh.1	0	ENSMUSG00000029648	Flt1	FMS-like tyrosine kinase 1	uc009aoh.1;uc009aoi.2	14254;14254	0;0
chr5	52100620	52120588	19969	*	9.61	9.29	9.88	-0.59	1.24e-10	2.73e-09	623.35	625.85	894	989.59	Exon (uc008xke.1/uc008xke.1, exon 1 of 2)	5	52135902	52136017	116	2	102466648	uc033ijs.1	15429	ENSMUSG00000098726	Mir6417	microRNA 6417	NA	NA	NA
chr4	122953827	122970585	16759	*	9.41	9.06	9.7	-0.64	1.27e-10	2.79e-09	546.68	521.87	784	876.72	Promoter (<=1kb)	4	122946850	122961188	14339	2	76574	uc008uoo.3	0	ENSMUSG00000028655	Mfsd2a	major facilitator superfamily domain containing 2A	uc008uoo.3	76574	0
chr7	33542827	33563215	20389	*	8.81	9.13	8.39	0.74	1.29e-10	2.82e-09	566.68	557.18	348	325	Distal Intergenic	7	33518488	33520455	1968	2	626970	uc057bzq.1	-22372	ENSMUSG00000099900	Scgb2b21	secretoglobin, family 2B, member 21	NA	NA	NA
chr9	88286076	88346925	60850	*	11.05	10.84	11.23	-0.39	1.3e-10	2.84e-09	1872.71	1800.05	2366	2450.14	Promoter (<=1kb)	9	88327609	88367844	40236	1	23959	uc009qyi.2	0	ENSMUSG00000032420	Nt5e	5' nucleotidase, ecto	uc009qyi.2;uc009qyj.2	23959;23959	0;0
chr7	79790302	79800017	9716	*	8.6	8.14	8.94	-0.81	1.33e-10	2.9e-09	260.67	302.13	477	507.93	Promoter (<=1kb)	7	79792241	79793590	1350	2	17292	uc009hzb.2	0	ENSMUSG00000030544	Mesp1	mesoderm posterior 1	uc009hzb.2;uc009hza.1	17292;626359	0;47139
chr2	164935034	164979257	44224	*	10.51	10.26	10.72	-0.46	1.47e-10	3.18e-09	1235.36	1221.29	1629	1742.73	Promoter (<=1kb)	2	164948219	164955850	7632	1	17395	uc008nwt.3	0	ENSMUSG00000017737	Mmp9	matrix metallopeptidase 9	uc008nwt.3;uc012cjf.2;uc056zqu.1;uc008nwu.2	17395;57138;57138;57138	0;0;0;0
chr10	83424571	83461562	36992	*	9.98	10.36	9.45	0.91	1.47e-10	3.19e-09	1360.7	1268.38	768	630.54	Exon (uc011xkm.1/uc011xkm.1, exon 1 of 1)	10	83360221	83368835	8615	1	28109	uc007gkg.2	64350	ENSMUSG00000020255	D10Wsu102e	DNA segment, Chr 10, Wayne State University 102, expressed	NA	NA	NA
chr14	58061229	58109984	48756	*	10.94	10.72	11.12	-0.4	1.49e-10	3.23e-09	1706.04	1665.66	2172	2289.58	Promoter (<=1kb)	14	58072686	58112720	40035	1	14180	uc007udx.2	0	ENSMUSG00000021974	Fgf9	fibroblast growth factor 9	uc007udx.2;uc007udy.2	14180;14180	0;0
chr5	93039570	93051808	12239	*	9.21	8.85	9.5	-0.65	1.53e-10	3.31e-09	461.34	459.09	693	756.06	Promoter (<=1kb)	5	93041123	93045022	3900	2	78088	uc008ydw.1	0	ENSMUSG00000045314	Sowahb	sosondowah ankyrin repeat domain family member B	uc008ydw.1	78088	0
chr2	119736024	119761725	25702	*	10	9.71	10.24	-0.53	1.56e-10	3.35e-09	823.35	852.45	1156	1259.12	Promoter (<=1kb)	2	119751326	119758525	7200	2	17005	uc008lug.1	0	ENSMUSG00000027297	Ltk	leukocyte tyrosine kinase	uc008lug.1;uc008luh.2;uc008lui.1;uc008luj.1;uc008luf.1;uc008lum.2;uc008luk.2;uc008lul.2;uc008lue.2	17005;17005;17005;17005;228550;68925;68925;68925;76246	0;0;0;0;0;25787;25812;25812;60956
chr1	172312970	172370691	57722	*	10.78	10.56	10.98	-0.42	1.65e-10	3.55e-09	1525.37	1484.19	1956	2084.27	Promoter (<=1kb)	1	172341210	172374085	32876	1	16513	uc007dqj.1	0	ENSMUSG00000044708	Kcnj10	potassium inwardly-rectifying channel, subfamily J, member 10	uc007dqb.2;uc007dqe.2;uc007dqj.1;uc007dqg.1;uc007dqh.1;uc007dqi.1	140559;140559;16513;16524;16524;16524	0;0;0;0;0;0
chr14	103308743	103334769	26027	*	9.37	9.65	9.02	0.63	1.74e-10	3.72e-09	827.35	778.88	503	538.1	3' UTR	14	103113411	103346800	233390	2	105689	uc007uwl.1	12031	ENSMUSG00000033004	Mycbp2	MYC binding protein 2, E3 ubiquitin protein ligase	uc007uwl.1;uc007uwo.1	105689;105689	0;0
chr16	92686266	92715170	28905	*	9.92	9.62	10.16	-0.54	1.74e-10	3.72e-09	806.02	772.99	1103	1187.12	Promoter (<=1kb)	16	92601466	92697329	95864	2	12394	uc007zzi.3	0	ENSMUSG00000022952	Runx1	runt related transcription factor 1	uc007zzi.3;uc012ain.2;uc007zzj.3;uc007zzk.3;uc007zzl.1	12394;12394;12394;12394;12394	0;0;0;0;0
chr4	46027866	46041619	13754	*	8.95	8.55	9.25	-0.7	1.77e-10	3.79e-09	383.34	368.84	615	604.26	Promoter (<=1kb)	4	46039222	46116032	76811	1	21916	uc008ste.1	0	ENSMUSG00000028328	Tmod1	tropomodulin 1	uc008stb.2;uc008stc.2;uc008ste.1	100121;100121;21916	0;0;0
chr10	127073436	127097697	24262	*	9.82	9.5	10.09	-0.59	1.81e-10	3.87e-09	714.68	729.83	1001	1175.44	Promoter (<=1kb)	10	127078907	127093170	14264	1	216439	uc007hhx.2	0	ENSMUSG00000025422	Agap2	ArfGAP with GTPase domain, ankyrin repeat and PH domain 2	uc029rjr.1;uc007hhx.2;uc007hhy.2;uc007hhz.2;uc007hia.2;uc007hhw.1	100504703;216439;216439;216440;216440;67125	2955;0;0;0;0;-3175
chr7	81930217	81944111	13895	*	9.26	8.91	9.55	-0.64	1.82e-10	3.88e-09	481.34	480.67	720	777.47	Promoter (<=1kb)	7	81881256	81934459	53204	2	29877	uc009icr.1	0	ENSMUSG00000025104	Hdgfl3	HDGF like 3	uc009icr.1;uc009ics.1	29877;29877	0;0
chr12	109437109	109461020	23912	*	9.56	9.25	9.82	-0.58	1.87e-10	3.98e-09	619.35	595.44	896	917.58	Promoter (<=1kb)	12	109452823	109463336	10514	1	13386	uc007pam.2	0	ENSMUSG00000040856	Dlk1	delta like non-canonical Notch ligand 1	uc007pam.2;uc007pan.2;uc007pao.2;uc011yry.1;uc011yrz.1	13386;13386;13386;13386;13386	0;0;0;0;0
chr18	74350890	74373303	22414	*	9.09	9.4	8.7	0.7	1.9e-10	4.04e-09	716.68	630.75	428	400.9	3' UTR	18	74283100	74359984	76885	1	74453	uc008fpl.2	67790	ENSMUSG00000035394	Cfap53	cilia and flagella associated protein 53	uc008fpl.2;uc008fpm.2	74453;74453	0;0
chr2	163192758	163207842	15085	*	9.24	8.88	9.53	-0.65	1.95e-10	4.12e-09	455.34	484.59	703	774.55	Distal Intergenic	2	163225454	163323102	97649	1	269389	uc008nso.1	-17612	ENSMUSG00000074607	Tox2	TOX high mobility group box family member 2	NA	NA	NA
chr4	129094108	129127460	33353	*	10.12	9.85	10.35	-0.49	2.03e-10	4.28e-09	898.69	949.56	1291	1310.7	Promoter (<=1kb)	4	129111570	129118967	7398	2	15444	uc008uwc.2	0	ENSMUSG00000028785	Hpca	hippocalcin	uc008uwc.2;uc033iet.1;uc008uwd.3;uc008uwb.3;uc033ieu.1;uc008uvz.2;uc008uwa.2;uc056zxf.1	15444;15444;15444;15444;15444;66260;66260;66260	0;0;0;0;0;0;0;0
chr8	11469622	11483087	13466	*	9.24	8.89	9.52	-0.63	2.04e-10	4.3e-09	473.34	474.78	718	753.14	Promoter (<=1kb)	8	11477929	11480241	2313	1	102132	uc009kve.1	0	ENSMUSG00000096957	E230013L22Rik	RIKEN cDNA E230013L22 gene	uc009kve.1;uc009kvd.1	102132;19332	0;0
chr8	122246152	122306909	60758	*	10.97	10.75	11.17	-0.42	2.27e-10	4.78e-09	1720.04	1720.6	2183	2422.89	Promoter (<=1kb)	8	122282141	122337247	55107	1	22761	uc009nsj.1	0	ENSMUSG00000049577	Zfpm1	zinc finger protein, multitype 1	uc009nsj.1	22761	0
chr6	29162215	29198558	36344	*	10.25	9.97	10.49	-0.51	2.28e-10	4.79e-09	967.36	1043.74	1357	1512.12	Promoter (<=1kb)	6	29169230	29179584	10355	2	101359	uc009bcz.2	0	ENSMUSG00000079654	Prrt4	proline-rich transmembrane protein 4	uc009bcz.2;uc009bda.2;uc009bdb.2;uc009bdc.2;uc009bcy.2	101359;23917;23917;23917;68272	0;0;0;0;0
chr19	10452838	10467910	15073	*	9.29	8.94	9.58	-0.64	2.31e-10	4.84e-09	485.34	496.36	725	802.77	Promoter (<=1kb)	19	10455371	10457447	2077	2	278795	uc012bio.2	0	ENSMUSG00000090291	Lrrc10b	leucine rich repeat containing 10B	uc012bio.2;uc008gpp.2;uc008gpq.2;uc012bin.1	278795;54525;54525;54525	0;0;0;0
chr10	93631684	93645183	13500	*	9.04	8.66	9.34	-0.68	2.31e-10	4.84e-09	420.01	390.42	635	665.57	Promoter (<=1kb)	10	93641049	93745972	104924	1	57764	uc007gux.2	0	ENSMUSG00000020019	Ntn4	netrin 4	uc007gux.2	57764	0
chr9	71209443	71257149	47707	*	10.7	10.47	10.9	-0.43	2.32e-10	4.85e-09	1438.7	1389.03	1852	1956.8	Promoter (<=1kb)	9	71211913	71215241	3329	2	100041660	uc033jlh.1	0	NA	Gm3458	predicted gene 3458	uc033jlh.1;uc033jli.1;uc033jlg.1;uc009qox.2	100041660;100041660;102635087;19378	0;0;40667;0
chr18	66282757	66297533	14777	*	9.26	8.91	9.53	-0.62	2.4e-10	5e-09	480.68	481.65	737	746.33	Promoter (<=1kb)	18	66047166	66291446	244281	2	320924	uc008ffp.1	0	ENSMUSG00000046318	Ccbe1	collagen and calcium binding EGF domains 1	uc008ffp.1;uc008ffr.1	320924;320924	0;0
chr6	116235557	116247570	12014	*	8.14	8.52	7.61	0.91	2.51e-10	5.22e-09	359.34	375.71	191	199.47	Exon (uc009djs.2/28006, exon 18 of 31)	6	116208033	116262671	54639	1	28006	uc009djs.2	27524	ENSMUSG00000024104	Washc2	WASH complex subunit 2`	uc009djs.2;uc009djt.1;uc009dju.1	28006;28006;28006	0;0;0
chr19	4979387	5016171	36785	*	10.2	9.94	10.43	-0.48	2.53e-10	5.25e-09	987.36	980.96	1335	1417.73	Promoter (<=1kb)	19	4984355	4989971	5617	2	225872	uc008gbu.2	0	ENSMUSG00000045903	Npas4	neuronal PAS domain protein 4	uc008gbu.2;uc012bgr.1	225872;225872	0;0
chr1	136250581	136266806	16226	*	9.16	8.8	9.46	-0.66	2.67e-10	5.53e-09	442.01	448.3	668	736.6	Promoter (<=1kb)	1	136258914	136260873	1960	2	383563	uc011wsy.1	0	ENSMUSG00000052759	Gpr25	G protein-coupled receptor 25	uc011wsy.1;uc011wsz.1;uc007cuq.1;uc007cur.2;uc011wta.2	383563;67886;67886;67886;67886	0;15693;79298;79298;79298
chr2	158595693	158626835	31143	*	10.14	9.87	10.36	-0.49	2.8e-10	5.79e-09	935.35	933.87	1270	1364.21	Promoter (<=1kb)	2	158595472	158610723	15252	2	100045469	uc008nqj.1	0	ENSMUSG00000086496	Gm14204	predicted gene 14204	uc008nqj.1;uc012cii.1;uc008nql.1;uc008nqm.1;uc012cij.1;uc029uhu.1;uc008nqk.1	100045469;100045469;109275;109275;109275;22348;22348	0;0;0;0;0;0;0
chr11	104122384	104143366	20983	*	9.66	9.34	9.92	-0.59	2.8e-10	5.79e-09	611.35	682.74	930	1013.92	Promoter (<=1kb)	11	104132781	104175523	42743	1	12921	uc007lvz.2	0	ENSMUSG00000018634	Crhr1	corticotropin releasing hormone receptor 1	uc007lvz.2;uc007lwa.3;uc011yfy.2	12921;12921;12921	0;0;0
chr3	144196180	144215784	19605	*	9.29	8.95	9.57	-0.63	2.86e-10	5.89e-09	502.01	485.57	737	787.2	Promoter (<=1kb)	3	144188530	144202332	13803	2	16911	uc008rpm.1	0	ENSMUSG00000028266	Lmo4	LIM domain only 4	uc008rpm.1;uc008rpl.2;uc012cyw.1;uc008rpo.2	16911;16911;16911;16911	0;0;0;0
chr16	98002390	98044172	41783	*	10.21	10.43	9.95	0.48	2.86e-10	5.89e-09	1392.03	1369.41	1017	961.37	Exon (uc008adz.2/245305, exon 2 of 5)	16	97997347	98016756	19410	1	245305	uc008adz.2	5043	ENSMUSG00000080717	B230307C23Rik	RIKEN cDNA B230307C23 gene	uc008adz.2;uc008aea.1;uc008aeb.1;uc012ajd.1	245305;320586;320586;320586	0;0;0;0
chr2	168588923	168604093	15171	*	8.98	8.59	9.28	-0.68	2.88e-10	5.91e-09	391.34	381.59	604	638.32	Promoter (<=1kb)	2	168476410	168590365	113956	2	18019	uc008oau.2	0	ENSMUSG00000027544	Nfatc2	nuclear factor of activated T cells, cytoplasmic, calcineurin dependent 2	uc008oau.2;uc008oav.2;uc012cjt.2;uc012cju.2;uc012cjv.2;uc012cjw.2;uc012cjx.2;uc012cjy.2;uc012cjz.2;uc012cka.2;uc012ckb.2;uc012ckc.2;uc008oaw.3;uc012ckd.3;uc012cke.3;uc008oax.3;uc008oay.3;uc012ckf.3;uc008oaz.2;uc008oba.2;uc012ckg.2;uc012ckh.2;uc012cki.2	18019;18019;18019;18019;18019;18019;18019;18019;18019;18019;18019;18019;18019;18019;18019;18019;18019;18019;18019;18019;18019;18019;18019	0;0;0;0;0;0;0;0;0;0;0;0;0;0;0;0;0;0;0;0;0;0;0
chr4	99649721	99688459	38739	*	10.31	10.05	10.53	-0.48	2.9e-10	5.93e-09	1080.02	1041.77	1425	1530.61	Promoter (<=1kb)	4	99656299	99658671	2373	1	15221	uc008tuv.1	0	ENSMUSG00000067261	Foxd3	forkhead box D3	uc008tuv.1	15221	0
chrX	51674737	51687934	13198	*	8.67	8.24	9	-0.75	2.91e-10	5.96e-09	309.34	296.25	504	516.69	Promoter (<=1kb)	20	51386637	51680477	293841	2	50786	uc009tdw.2	0	ENSMUSG00000062184	Hs6st2	heparan sulfate 6-O-sulfotransferase 2	uc009tdw.2;uc009tdx.2;uc009tdy.2;uc009tdz.2;uc009tea.1	50786;50786;50786;50786;50786	0;0;0;0;0
chr11	97514918	97558968	44051	*	10.38	10.12	10.6	-0.48	2.98e-10	6.07e-09	1099.36	1129.08	1477	1624.99	Exon (uc007lee.1/56013, exon 2 of 20)	11	97509340	97575126	65787	2	56013	uc007lee.1	16158	ENSMUSG00000038453	Srcin1	SRC kinase signaling inhibitor 1	uc007lee.1	56013	0
chr7	26478932	26507844	28913	*	9.3	9.59	8.93	0.66	3.04e-10	6.19e-09	824.02	716.1	482	495.28	Distal Intergenic	7	26535023	26574148	39126	1	233001	uc009fuo.3	-27179	ENSMUSG00000054102	Nlrp9a	NLR family, pyrin domain containing 9A	uc009ful.1;uc009fum.1;uc012fgc.1	243880;243880;243880	43819;43318;29685
chr19	44495167	44519915	24749	*	9.84	9.54	10.08	-0.54	3.05e-10	6.19e-09	773.35	714.14	1062	1105.38	Promoter (1-2kb)	19	44493472	44514273	20802	1	22423	uc008hpt.2	1695	ENSMUSG00000036961	Wnt8b	wingless-type MMTV integration site family, member 8B	uc008hpt.2;uc008hpu.1;uc012bmg.1	22423;240667;240667	0;0;0
chr13	56192976	56273661	80686	*	11.85	11.55	12.1	-0.54	3.21e-10	6.51e-09	3025.4	2990.93	4113	4658.96	Promoter (<=1kb)	13	56250492	56252163	1672	2	18014	uc007qsl.3	0	ENSMUSG00000048904	Neurog1	neurogenin 1	uc007qsl.3;uc056ytv.1	18014;75245	0;0
chr14	98153967	98195022	41056	*	10.51	10.26	10.72	-0.46	3.25e-10	6.59e-09	1223.36	1233.06	1612	1756.35	Promoter (<=1kb)	14	97786846	98169765	382920	2	13134	uc007uur.2	0	ENSMUSG00000055639	Dach1	dachshund family transcription factor 1	uc007uur.2;uc007uus.2;uc007uut.2	13134;13134;13134	0;0;0
chr4	123222789	123247080	24292	*	9.7	9.38	9.96	-0.58	3.26e-10	6.6e-09	664.02	669.01	931	1064.52	Promoter (<=1kb)	4	123233556	123249870	16315	1	56198	uc008uoz.1	0	ENSMUSG00000032744	Heyl	hairy/enhancer-of-split related with YRPW motif-like	uc008uoz.1	56198	0
chr17	32387565	32400400	12836	*	9.05	8.66	9.35	-0.68	3.3e-10	6.65e-09	412.01	399.25	617	686	Promoter (<=1kb)	17	32354050	32387817	33768	2	22404	uc008bwn.2	0	ENSMUSG00000024050	Wiz	widely-interspaced zinc finger motifs	uc008bwn.2;uc008bwo.2;uc008bwq.2;uc008bwr.1;uc012aoy.1;uc008bws.2;uc008bwt.2;uc057kxb.1;uc008bwu.1;uc008bwv.1;uc008bww.1;uc008bwx.2	22404;22404;22404;22404;22404;22404;22404;320484;320484;320484;320484;664702	0;0;0;0;0;0;0;0;0;0;0;-2614
chr8	70346322	70390007	43686	*	10.8	10.59	10.99	-0.4	3.34e-10	6.74e-09	1558.04	1516.56	2026	2037.56	Promoter (<=1kb)	8	70373548	70382066	8519	1	12845	uc009mad.2	0	ENSMUSG00000031849	Comp	cartilage oligomeric matrix protein	uc009mad.2;uc009mab.2;uc012gfa.1;uc009mae.1	12845;19704;19704;382056	0;0;0;0
chr18	9208712	9224585	15874	*	9.45	9.12	9.71	-0.59	3.39e-10	6.83e-09	558.01	555.22	869	811.52	Promoter (<=1kb)	18	9212856	9216201	3346	1	14370	uc008eag.2	0	ENSMUSG00000036904	Fzd8	frizzled class receptor 8	uc008eag.2	14370	0
chr1	75416151	75430987	14837	*	9.2	8.84	9.49	-0.65	3.53e-10	7.09e-09	462.01	453.2	680	758.98	Exon (uc007boz.2/11790, exon 23 of 41)	1	75375297	75432314	57018	1	11790	uc007boz.2	40854	ENSMUSG00000026207	Speg	SPEG complex locus	uc007boz.2;uc007bpc.2;uc007bpd.1	11790;11790;69080	0;0;-4956
chr5	67592912	67614378	21467	*	9.72	9.41	9.97	-0.56	3.56e-10	7.13e-09	688.02	673.92	958	1047	Promoter (<=1kb)	5	67607883	67613987	6105	1	330096	uc008xpy.2	0	ENSMUSG00000050010	Shisa3	shisa family member 3	uc008xqa.2;uc008xqb.2;uc008xqc.2;uc008xpy.2	11980;11980;11980;330096	0;0;0;0
chr4	154169281	154176291	7011	*	8.29	7.8	8.66	-0.85	3.6e-10	7.21e-09	228.67	217.77	390	416.46	Promoter (<=1kb)	4	154170713	154275721	105009	1	230971	uc008wbp.2	0	ENSMUSG00000057751	Megf6	multiple EGF-like-domains 6	uc008wbp.2;uc008wbj.1;uc008wbk.1	230971;59002;59002	0;0;14070
chr4	139060106	139078769	18664	*	9.25	8.9	9.53	-0.63	3.65e-10	7.28e-09	474.68	482.63	715	762.87	Promoter (<=1kb)	4	139061409	139074789	13381	2	15565	uc008vlr.1	0	ENSMUSG00000028747	Htr6	5-hydroxytryptamine (serotonin) receptor 6	uc008vlr.1;uc008vls.1;uc056zyc.1;uc008vlp.2	15565;17965;77056;77056	0;0;87823;87201
chr18	3038889	3052808	13920	*	8.47	8.81	8.01	0.8	3.69e-10	7.36e-09	459.34	439.47	259	255.91	Distal Intergenic	18	3122492	3123412	921	2	100312476	uc008dxj.1	70604	ENSMUSG00000091539	Vmn1r238	vomeronasal 1 receptor, 238	NA	NA	NA
chr3	88182419	88223337	40919	*	10.81	10.43	11.11	-0.68	3.81e-10	7.57e-09	1348.03	1401.79	2049	2368.4	Promoter (<=1kb)	3	88215171	88215257	87	1	100526540	uc012crn.1	0	ENSMUSG00000092988	Mir3093	microRNA 3093	uc012crn.1;uc012cro.1;uc008pue.2;uc008puf.2	100526540;387133;76642;76642	0;0;-4634;-4634
chr15	99214173	99232147	17975	*	9.29	8.95	9.56	-0.62	3.82e-10	7.57e-09	498.68	487.53	739	773.57	Promoter (<=1kb)	15	99224976	99242817	17842	1	16512	uc011zzc.1	0	ENSMUSG00000037579	Kcnh3	potassium voltage-gated channel, subfamily H (eag-related), member 3	uc011zzc.1;uc007xox.1	16512;72572	0;87328
chr1	38620426	38639279	18854	*	9.48	9.16	9.75	-0.59	3.83e-10	7.59e-09	569.35	573.86	828	888.39	Promoter (<=1kb)	1	38175991	38627244	451254	2	16764	uc007ast.2	0	ENSMUSG00000037138	Aff3	AF4/FMR2 family, member 3	uc007ast.2;uc007asu.1;uc056ycp.1	16764;16764;16764	0;0;0
chr2	103960181	103978479	18299	*	9.47	9.14	9.74	-0.59	3.96e-10	7.82e-09	580.01	551.3	826	880.61	Promoter (<=1kb)	2	103969557	103981878	12322	1	16909	uc012cak.1	0	ENSMUSG00000032698	Lmo2	LIM domain only 2	uc012caj.1;uc012cak.1;uc008ljf.2;uc012cal.1	16909;16909;16909;16909	0;0;0;0
chr4	131908317	131925278	16962	*	9.33	8.97	9.62	-0.65	4.04e-10	7.97e-09	532.01	469.88	751	820.28	Promoter (<=1kb)	4	131899478	131920029	20552	2	545681	uc008vai.2	0	ENSMUSG00000085667	Gm12992	predicted gene 12992	uc008vak.4;uc008val.4;uc008vam.4;uc012dma.3;uc008van.4;uc012dmb.1;uc056zxk.1;uc056zxl.1;uc012dmc.1;uc008vai.2;uc033iey.1;uc012dlz.1	269587;269587;269587;269587;269587;269587;269587;269587;269587;545681;545681;623230	0;0;0;0;0;32541;78516;78516;82160;0;0;0
chr4	148801593	148812793	11201	*	8.83	8.42	9.15	-0.73	4.12e-10	8.12e-09	335.34	350.2	532	606.21	Promoter (<=1kb)	4	148804392	148891936	87545	1	69743	uc008vvk.1	0	ENSMUSG00000028977	Casz1	castor zinc finger 1	uc008vvk.1;uc008vvl.1;uc008vvn.2	69743;69743;69743	0;0;0
chr13	52973568	52984018	10451	*	8.97	8.55	9.29	-0.74	4.13e-10	8.13e-09	374.01	375.71	564	690.86	Promoter (<=1kb)	13	52967209	52981039	13831	2	18030	uc007qni.1	0	ENSMUSG00000056749	Nfil3	nuclear factor, interleukin 3, regulated	uc007qnh.1;uc007qni.1	18030;18030	-503;0
chr15	102015193	102041048	25856	*	9.62	9.32	9.87	-0.55	4.48e-10	8.81e-09	641.35	634.68	937	933.15	Promoter (<=1kb)	15	102028216	102032026	3811	1	16668	uc007xuj.2	0	ENSMUSG00000023043	Krt18	keratin 18	uc007xuj.2	16668	0
chr1	93094623	93107133	12511	*	9.1	8.74	9.4	-0.66	4.61e-10	9.04e-09	441.34	411.02	655	691.84	Promoter (<=1kb)	1	93015455	93101874	86420	2	16560	uc007cdf.3	0	ENSMUSG00000014602	Kif1a	kinesin family member 1A	uc007cdf.3;uc007cdg.3;uc007cdh.3	16560;16560;16560	0;0;0
chr13	3449046	3490203	41158	*	9.96	10.2	9.67	0.53	4.68e-10	9.15e-09	1244.7	1113.38	804	826.12	Promoter (<=1kb)	13	3478260	3485220	6961	1	76937	uc007pit.1	0	ENSMUSG00000097709	2810429I04Rik	RIKEN cDNA 2810429I04 gene	uc007pit.1;uc007pip.2;uc007piq.2;uc007pis.2	76937;76937;76937;76937	0;0;0;0
chr5	125525863	125539439	13577	*	9.27	8.92	9.54	-0.62	4.73e-10	9.21e-09	466.01	505.19	759	734.65	Promoter (<=1kb)	5	125532418	125792583	260166	1	208151	uc012eds.1	0	ENSMUSG00000070498	Tmem132b	transmembrane protein 132B	uc012eds.1	208151	0
chr12	76395249	76429679	34431	*	10.35	10.09	10.57	-0.47	4.73e-10	9.21e-09	1082.02	1104.56	1447	1588.02	Promoter (<=1kb)	12	76404176	76406938	2763	1	15512	uc007nyf.2	0	ENSMUSG00000059970	Hspa2	heat shock protein 2	uc007nyf.2;uc011yoa.2;uc011yob.1	15512;15512;210762	0;0;0
chr2	76394015	76415546	21532	*	9.58	9.27	9.84	-0.56	4.74e-10	9.21e-09	598.68	639.58	915	912.72	Promoter (<=1kb)	2	76406508	76600647	194140	1	99031	uc008kfa.2	0	ENSMUSG00000042359	Osbpl6	oxysterol binding protein-like 6	uc008kfa.2;uc008kfb.2;uc008kfc.2	99031;99031;99031	0;0;0
chr16	52433784	52462117	28334	*	9.9	9.61	10.14	-0.52	4.74e-10	9.21e-09	784.02	779.86	1078	1171.55	Promoter (<=1kb)	16	52248996	52452997	204002	2	11658	uc007zli.2	0	ENSMUSG00000022636	Alcam	activated leukocyte cell adhesion molecule	uc007zli.2;uc057kvm.1;uc012agn.1	11658;11658;11658	0;0;0
chr5	73639090	73662869	23780	*	9.83	9.51	10.08	-0.57	4.81e-10	9.33e-09	702.68	759.26	1011	1159.87	Promoter (<=1kb)	5	73632749	73647731	14983	2	24051	uc008xtb.1	0	ENSMUSG00000029156	Sgcb	sarcoglycan, beta (dystrophin-associated glycoprotein)	uc008xtb.1;uc008xtc.2;uc008xte.2;uc008xtd.2;uc012dxe.1	24051;73472;73472;73472;73472	0;0;0;0;0
chr14	57048874	57060144	11271	*	8.85	8.44	9.18	-0.74	4.95e-10	9.58e-09	342.67	352.16	533	623.72	Promoter (<=1kb)	14	57034460	57057723	23264	2	14611	uc007ucv.2	0	ENSMUSG00000048582	Gja3	gap junction protein, alpha 3	uc007ucv.2;uc007ucw.2	14611;14611	0;0
chr5	145294304	145327559	33256	*	9.73	9.98	9.42	0.56	5.05e-10	9.75e-09	1058.69	957.41	684	686	Distal Intergenic	5	145283352	145291469	8118	1	666311	uc012egv.1	10952	ENSMUSG00000070420	Zscan25	zinc finger and SCAN domain containing 25	uc009amt.1;uc012egv.1	666311;666311	10961;10952
chr7	43461621	43479186	17566	*	9.12	8.76	9.41	-0.65	5.11e-10	9.87e-09	442.01	425.73	662	696.7	Promoter (<=1kb)	7	43463233	43472014	8782	1	75690	uc009gmu.2	0	ENSMUSG00000070604	Vsig10l	V-set and immunoglobulin domain containing 10 like	uc033iyx.1;uc009gmt.2;uc009gmv.2;uc009gmu.2	102465636;110826;210094;75690	4124;17549;0;0
chr18	25739608	25761626	22019	*	9.72	9.41	9.97	-0.56	5.19e-10	9.99e-09	710.02	651.35	1027	976.94	Promoter (<=1kb)	18	25477620	25753983	276364	2	108013	uc008ehk.2	0	ENSMUSG00000024268	Celf4	CUGBP, Elav-like family member 4	uc008ehk.2;uc008ehl.2;uc012ban.1;uc012bao.1;uc012bap.1;uc012baq.1	108013;108013;108013;108013;108013;108013	0;0;0;0;0;0
chr14	46877017	46893381	16365	*	9.36	9.03	9.63	-0.6	5.2e-10	1e-08	520.68	527.75	770	818.33	Promoter (<=1kb)	14	46882965	47105817	222853	1	74480	uc007thn.2	0	ENSMUSG00000021838	Samd4	sterile alpha motif domain containing 4	uc007thn.2;uc007tho.2;uc007thp.1	74480;74480;74480	0;0;0
chr7	127455639	127469721	14083	*	8.68	9.01	8.25	0.76	5.91e-10	1.13e-08	527.35	506.17	327	282.18	Exon (uc009jvm.1/uc009jvm.1, exon 2 of 2)	7	127233443	127508184	274742	1	233887	uc029wov.1	222196	ENSMUSG00000045598	Zfp553	zinc finger protein 553	uc029wov.1;uc009jvo.1;uc009jvp.1	233887;233895;233895	0;-1278;-1893
chr9	8891475	8907978	16504	*	9.37	9.05	9.64	-0.59	6.06e-10	1.16e-08	528.01	528.73	776	819.31	Promoter (<=1kb)	9	8899833	8948607	48775	1	18667	uc009odn.1	0	ENSMUSG00000031870	Pgr	progesterone receptor	uc009odn.1;uc009odo.1	18667;18667	0;0
chr15	82050247	82085277	35031	*	10.24	9.97	10.46	-0.49	6.28e-10	1.2e-08	1032.02	978.99	1348	1475.14	Promoter (<=1kb)	15	82059151	82066538	7388	1	328573	uc007wyb.1	0	ENSMUSG00000075524	4930407I10Rik	RIKEN cDNA 4930407I10 gene	uc007wya.1;uc007wyb.1;uc011zwp.1;uc057bgu.1;uc007wyd.2;uc011zwq.1	20826;328573;74369;74369;74369;74369	-2649;0;0;0;0;0
chr4	88024970	88041212	16243	*	9.18	8.83	9.46	-0.63	6.41e-10	1.22e-08	446.68	463.01	686	720.06	Promoter (<=1kb)	4	87769925	88033407	263483	2	70122	uc008tmp.1	0	ENSMUSG00000028496	Mllt3	myeloid/lymphoid or mixed-lineage leukemia; translocated to, 3	uc008tmp.1;uc012dgu.1;uc008tmr.1;uc029uwq.1	70122;70122;70122;70122	0;0;0;0
chr11	21977199	22013996	36798	*	10.9	10.53	11.2	-0.67	6.46e-10	1.23e-08	1530.04	1424.35	2194	2499.76	Promoter (<=1kb)	11	21994764	22001651	6888	2	18423	uc007idy.1	0	ENSMUSG00000005917	Otx1	orthodenticle homeobox 1	uc007idy.1;uc007idz.1;uc007iea.3;uc007ieb.3	18423;18423;216565;216565	0;0;0;0
chr1	181341888	181361874	19987	*	9.49	9.18	9.75	-0.57	6.47e-10	1.23e-08	574.68	586.61	851	869.91	Promoter (<=1kb)	1	181352628	181460641	108014	1	72978	uc007dxh.2	0	ENSMUSG00000026514	Cnih3	cornichon family AMPA receptor auxiliary protein 3	uc007dxh.2;uc007dxi.2;uc011wxs.1	72978;72978;72978	0;0;0
chr3	118415985	118443745	27761	*	9.88	9.6	10.12	-0.52	6.56e-10	1.24e-08	800.69	752.39	1101	1121.93	Promoter (<=1kb)	3	118433857	118433929	73	1	387155	uc012cwx.1	0	ENSMUSG00000065569	Mir137	microRNA 137	uc012cwx.1	387155	0
chr2	10342897	10403155	60259	*	11.07	10.87	11.25	-0.39	6.6e-10	1.25e-08	1924.71	1808.88	2376	2510.47	Promoter (<=1kb)	2	10370451	10439137	68687	1	353282	uc008iht.2	0	ENSMUSG00000061186	Sfmbt2	Scm-like with four mbt domains 2	uc008iht.2;uc008ihu.2;uc008ihv.2;uc008ihw.2;uc008ihx.2;uc008ihy.2;uc008ihz.1	353282;353282;353282;353282;353282;353282;353282	0;0;0;0;0;0;0
chr9	54747416	54777919	30504	*	10.03	9.76	10.25	-0.49	6.66e-10	1.26e-08	855.35	876.97	1186	1252.31	Promoter (<=1kb)	9	54764748	54773110	8363	1	12903	uc009prp.2	0	ENSMUSG00000032291	Crabp1	cellular retinoic acid binding protein I	uc009prp.2;uc033jkr.1	12903;12903	0;0
chr2	125102788	125112374	9587	*	8.23	8.62	7.7	0.92	6.76e-10	1.28e-08	366.01	420.83	228	186.83	Exon (uc008mbw.2/17876, exon 6 of 19)	2	125086271	125123660	37390	2	17876	uc008mbw.2	11286	ENSMUSG00000027201	Myef2	myelin basic protein expression factor 2, repressor	uc008mbw.2;uc008mca.2;uc008mby.2;uc008mbz.2;uc012cdb.1;uc008mcb.2;uc008mcc.2	17876;17876;17876;17876;17876;17876;17876	0;0;0;0;0;0;0
chr14	25445678	25471179	25502	*	9.85	9.55	10.1	-0.56	6.82e-10	1.29e-08	718.68	775.94	1029	1168.63	Promoter (<=1kb)	14	25459185	25648490	189306	1	328365	uc007srm.2	0	ENSMUSG00000007817	Zmiz1	zinc finger, MIZ-type containing 1	uc007srm.2;uc007srn.3;uc007sro.3	328365;328365;328365	0;0;0
chr12	61512157	61537083	24927	*	9.72	9.42	9.97	-0.54	6.96e-10	1.31e-08	710.68	663.13	993	1007.11	Promoter (<=1kb)	12	61499660	61521820	22161	2	100504101	uc007nql.1	0	ENSMUSG00000113429	Gm20063	predicted gene, 20063	uc007nql.1;uc007nqm.2;uc007nqn.3	100504101;238205;238205	0;0;0
chr5	74935155	74969153	33999	*	10.4	10.15	10.62	-0.47	7.2e-10	1.35e-08	1140.03	1130.06	1487	1663.91	Promoter (<=1kb)	5	74949194	74966368	17175	1	619945	uc029vir.1	0	ENSMUSG00000072874	Gm6116	predicted gene 6116	uc029vir.1	619945	0
chr3	103567832	103588871	21040	*	9.62	9.3	9.87	-0.57	7.28e-10	1.37e-08	628.01	636.64	887	990.56	Promoter (<=1kb)	3	103575282	103630969	55688	1	54524	uc008qsy.2	0	ENSMUSG00000027849	Syt6	synaptotagmin VI	uc008qsy.2;uc033hyw.1;uc033hyx.1;uc008qta.2;uc008qtc.2;uc008qtd.2;uc008qtb.1	54524;54524;54524;54524;54524;54524;54524	0;0;0;0;0;0;0
chr2	163849423	163859633	10211	*	8.97	8.58	9.27	-0.69	7.33e-10	1.37e-08	376.68	389.44	579	657.78	Promoter (<=1kb)	2	163853750	163858874	5125	1	241769	uc008ntn.1	0	ENSMUSG00000035238	Kcnk15	potassium channel, subfamily K, member 15	uc008ntn.1;uc008nto.1	241769;241770	0;0
chr1	187598024	187617201	19178	*	9.63	9.31	9.89	-0.58	7.64e-10	1.43e-08	642.68	627.81	887	1014.89	Promoter (<=1kb)	1	187609006	188214884	605879	1	26381	uc007eaa.2	0	ENSMUSG00000026610	Esrrg	estrogen-related receptor gamma	uc007eaa.2	26381	0
chr13	114447031	114490411	43381	*	10.6	10.37	10.8	-0.43	7.89e-10	1.47e-08	1352.7	1295.84	1736	1827.39	Promoter (<=1kb)	13	114452262	114458951	6690	2	14313	uc007rxn.2	0	ENSMUSG00000021765	Fst	follistatin	uc007rxn.2;uc007rxo.2;uc007rxp.2	14313;14313;14313	0;0;0
chr3	3000294	3023213	22920	*	9.16	9.44	8.8	0.64	8.03e-10	1.5e-08	671.35	721	444	448.58	Distal Intergenic	3	3508030	3659800	151771	1	30942	uc008ony.2	-484817	ENSMUSG00000017688	Hnf4g	hepatocyte nuclear factor 4, gamma	NA	NA	NA
chr17	46285838	46300433	14596	*	9.25	8.9	9.53	-0.63	8.33e-10	1.55e-08	492.68	463.99	705	777.47	Promoter (<=1kb)	17	46297483	46303271	5789	1	106565	uc008csl.2	0	ENSMUSG00000047428	Dlk2	delta like non-canonical Notch ligand 2	uc008csl.2;uc008csm.2;uc008csn.1;uc008cso.1;uc012auq.1;uc008csf.2;uc008csg.2;uc008csh.2;uc029tic.1;uc008csj.2	106565;106565;224814;224814;224814;74094;74094;74094;74094;74094	0;0;25333;27590;27590;-2812;-2812;-2812;-2812;-3399
chr3	107752263	107770362	18100	*	9.29	8.95	9.56	-0.61	8.66e-10	1.61e-08	503.34	484.59	728	782.33	Promoter (<=1kb)	3	107741048	107760469	19422	2	12977	uc008qxk.2	0	ENSMUSG00000014599	Csf1	colony stimulating factor 1 (macrophage)	uc008qxk.2;uc008qxl.2;uc008qxm.1;uc008qxn.1	12977;12977;12977;12977	0;0;0;0
chr8	11307754	11323969	16216	*	9.27	8.92	9.55	-0.63	8.83e-10	1.64e-08	507.35	462.03	723	776.49	Promoter (<=1kb)	8	11198423	11312826	114404	2	12826	uc009kvb.2	0	ENSMUSG00000031502	Col4a1	collagen, type IV, alpha 1	uc009kvb.2;uc012fzi.1;uc009kvc.3	12826;12826;12827	0;0;0
chr15	98594545	98644061	49517	*	10.57	10.34	10.77	-0.43	9.36e-10	1.73e-08	1268.7	1331.16	1700	1800.14	Promoter (<=1kb)	15	98589978	98597010	7033	2	11512	uc011zyy.3	0	ENSMUSG00000022994	Adcy6	adenylate cyclase 6	uc011zyy.3;uc007xmz.3;uc011zyz.3;uc007xna.3;uc007xnb.2;uc007xnc.2;uc011zza.2;uc007xnd.2;uc007xmy.2;uc007xne.1;uc007xnf.2	11512;11512;11512;11512;12297;12297;12297;12297;73863;74351;74351	0;0;0;0;0;0;0;0;23541;18828;18828
chr6	8937389	8974162	36774	*	10.36	10.11	10.57	-0.46	9.4e-10	1.74e-08	1137.36	1073.17	1476	1564.66	Promoter (<=1kb)	6	8948614	8952430	3817	1	18231	uc009aya.1	0	ENSMUSG00000046178	Nxph1	neurexophilin 1	uc009aya.1;uc009ayb.1;uc009ayc.1	18231;18231;18231	0;0;0
chr13	54937566	54962398	24833	*	9.69	9.38	9.95	-0.57	9.41e-10	1.74e-08	660.68	673.92	923	1053.81	Promoter (<=1kb)	13	54949411	55006018	56608	1	107448	uc007qpp.2	0	ENSMUSG00000025876	Unc5a	unc-5 netrin receptor A	uc007qpp.2;uc007qpq.2	107448;107448	0;0
chr2	92042222	92068714	26493	*	9.95	9.68	10.18	-0.5	9.44e-10	1.74e-08	805.35	832.83	1131	1181.28	5' UTR	2	91982328	92024170	41843	2	26427	uc008kxf.1	-18052	ENSMUSG00000027230	Creb3l1	cAMP responsive element binding protein 3-like 1	NA	NA	NA
chr11	50594228	50607174	12947	*	9.12	8.76	9.4	-0.64	9.58e-10	1.76e-08	450.01	417.89	682	671.4	Promoter (<=1kb)	11	50602085	50807573	205489	1	216725	uc007iso.2	0	ENSMUSG00000036545	Adamts2	a disintegrin-like and metallopeptidase (reprolysin type) with thrombospondin type 1 motif, 2	uc007iso.2;uc057ayg.1	216725;216725	0;0
chr8	95522424	95708000	185577	*	12.61	12.49	12.72	-0.23	9.59e-10	1.76e-08	5860.8	5621.86	6640	6835.67	Promoter (<=1kb)	8	95678085	95715119	37035	1	234593	uc009mys.2	0	ENSMUSG00000036564	Ndrg4	N-myc downstream regulated gene 4	uc009mys.2;uc009myt.2;uc009myu.2;uc009myn.1;uc009myo.2;uc009myp.2;uc009myq.1;uc009myr.1	234593;234593;234593;244608;70993;70993;70993;78833	0;0;0;0;0;0;0;0
chr8	15007710	15016800	9091	*	8.67	8.24	8.99	-0.75	9.74e-10	1.78e-08	285.34	319.79	483	537.12	Promoter (<=1kb)	8	15011025	15033333	22309	1	74901	uc009kzk.3	0	ENSMUSG00000055675	Kbtbd11	kelch repeat and BTB (POZ) domain containing 11	uc009kzk.3	74901	0
chr17	67350137	67359462	9326	*	8.62	8.2	8.95	-0.75	9.89e-10	1.81e-08	298.67	288.4	473	513.77	Promoter (<=1kb)	17	66666848	67354459	687612	2	19274	uc008dka.2	0	ENSMUSG00000033278	Ptprm	protein tyrosine phosphatase, receptor type, M	uc008dka.2;uc008dkb.2;uc012awj.1	19274;19274;19274	0;0;0
chr16	4798838	4827982	29145	*	9.62	9.88	9.31	0.58	1.02e-09	1.86e-08	1002.02	887.76	617	650	Distal Intergenic	16	4835416	4852129	16714	1	78809	uc007yam.1	-7434	ENSMUSG00000022518	4930562C15Rik	RIKEN cDNA 4930562C15 gene	NA	NA	NA
chr16	35473773	35571143	97371	*	12.2	12.07	12.32	-0.25	1.02e-09	1.86e-08	4275.43	4299.53	5053	5139.64	Promoter (<=1kb)	16	35541362	35664258	122897	1	20357	uc007zbm.2	0	ENSMUSG00000052133	Sema5b	sema domain, seven thrombospondin repeats (type 1 and type 1-like), transmembrane domain (TM) and short cytoplasmic domain, (semaphorin) 5B	uc007zbm.2;uc012aez.1;uc029swy.1;uc007zbl.1	20357;20357;69768;72599	0;0;0;0
chr8	124737291	124836190	98900	*	11.86	11.69	12.02	-0.33	1.02e-09	1.86e-08	3312.74	3285.22	3921	4360.23	Promoter (<=1kb)	8	124793019	124834704	41686	1	330863	uc012gmz.1	0	ENSMUSG00000036913	Trim67	tripartite motif-containing 67	uc012gmz.1;uc009nxs.2;uc009nxn.1;uc012gmw.1;uc012gmx.1;uc012gmy.1;uc009nxp.1	330863;66523;68865;68865;68865;68865;69627	0;0;0;0;0;0;0
chr17	26428669	26441147	12479	*	9.04	8.68	9.33	-0.65	1.03e-09	1.87e-08	420.01	401.21	629	660.7	Exon (uc008bed.3/240055, exon 2 of 5)	17	26414965	26446349	31385	1	240055	uc008bed.3	13704	ENSMUSG00000034413	Neurl1b	neuralized E3 ubiquitin protein ligase 1B	uc008bed.3	240055	0
chr2	31839480	31852176	12697	*	8.87	8.48	9.18	-0.7	1.07e-09	1.94e-08	364.01	349.22	547	613.99	Promoter (<=1kb)	2	31813290	31846005	32716	2	98970	uc008jee.2	0	ENSMUSG00000026841	Fibcd1	fibrinogen C domain containing 1	uc008jee.2	98970	0
chr4	60028898	60041320	12423	*	7.89	8.29	7.33	0.95	1.09e-09	1.98e-08	312.01	311.94	159	163.47	Distal Intergenic	4	60003549	60006214	2666	1	620807	uc008tah.1	25349	ENSMUSG00000078689	Mup6	major urinary protein 6	NA	NA	NA
chr17	21023751	21034978	11228	*	8.24	8.6	7.75	0.85	1.11e-09	2e-08	404.68	371.78	216	215.04	3' UTR	17	21008941	21028857	19917	1	224585	uc008aqk.3	14810	ENSMUSG00000067942	Zfp160	zinc finger protein 160	uc008aqk.3;uc008aql.2;uc008aqm.2;uc008aqn.3	224585;224585;224585;224585	0;0;0;0
chr10	41769090	41820392	51303	*	10.41	10.64	10.14	0.5	1.11e-09	2.01e-08	1720.71	1472.41	1128	1131.66	Promoter (<=1kb)	10	41718840	41781550	62711	2	103268	uc057kip.1	0	ENSMUSG00000019813	Cep57l1	centrosomal protein 57-like 1	uc007eyd.1;uc057kip.1;uc007exz.2;uc007eya.2;uc011xdc.2;uc011xdd.2;uc007eye.2	100196896;103268;103268;103268;103268;103268;140742	0;0;0;0;0;0;0
chr14	12069470	12077931	8462	*	7.91	8.31	7.36	0.95	1.12e-09	2.01e-08	323.34	310.96	173	154.71	Intron (uc007sfm.2/19270, intron 5 of 29)	14	11553553	12242039	688487	1	19270	uc007sfm.2	515917	ENSMUSG00000021745	Ptprg	protein tyrosine phosphatase, receptor type, G	uc007sfm.2;uc011zfz.1	19270;19270	0;0
chr4	41495528	41528440	32913	*	10.09	9.83	10.31	-0.48	1.13e-09	2.03e-08	887.35	938.77	1251	1292.21	Promoter (<=1kb)	4	41495601	41503075	7475	2	329828	uc008sit.2	0	ENSMUSG00000046312	AI464131	expressed sequence AI464131	uc008sit.2;uc008siz.2;uc008sja.1;uc012dcc.2;uc008siu.1;uc008siv.1;uc029uqf.1;uc029uqg.1;uc008six.1;uc008siy.1;uc029uqh.2;uc029uqi.1;uc029uqj.1	329828;71901;71901;71901;73721;73721;73721;73721;73721;73721;73721;73721;76992	0;0;0;0;0;0;0;0;0;0;0;0;0
chr7	141946463	141953981	7519	*	8.33	7.87	8.68	-0.81	1.14e-09	2.04e-08	236.67	231.51	403	417.44	Promoter (<=1kb)	7	141949751	142004244	54494	1	75770	uc009kme.3	0	ENSMUSG00000053046	Brsk2	BR serine/threonine kinase 2	uc009kme.3;uc009kmf.3;uc009kmg.2;uc009kmh.2;uc029wpt.2;uc029wpu.2	75770;75770;75770;75770;75770;75770	0;0;0;0;0;0
chr9	65386521	65406205	19685	*	9.5	9.19	9.75	-0.57	1.17e-09	2.09e-08	557.35	608.19	862	865.04	Promoter (<=1kb)	9	65398488	65412708	14221	1	70784	uc009qdf.3	0	ENSMUSG00000041696	Rasl12	RAS-like, family 12	uc009qdf.3;uc012gvk.2;uc012gvl.1;uc009qde.2	70784;70784;70784;74492	0;0;0;0
chr12	99286526	99306270	19745	*	9.61	9.28	9.88	-0.6	1.2e-09	2.15e-08	628.68	617.02	863	1026.57	Promoter (<=1kb)	12	99209461	99291301	81841	2	71375	uc007oru.1	0	ENSMUSG00000033713	Foxn3	forkhead box N3	uc007ors.1;uc007ort.1;uc007oru.1;uc007orv.1	71375;71375;71375;71375	0;0;0;0
chr2	61802199	61845872	43674	*	10.91	10.54	11.2	-0.67	1.2e-09	2.15e-08	1504.03	1463.59	2171	2542.58	Promoter (<=1kb)	2	61804453	61814114	9662	1	21375	uc008jvd.2	0	ENSMUSG00000035033	Tbr1	T-box brain gene 1	uc008jvd.2;uc008jvc.1	21375;59029	0;90505
chr9	37419261	37441368	22108	*	9.79	9.5	10.04	-0.54	1.25e-09	2.24e-08	733.35	711.19	993	1106.36	Promoter (<=1kb)	9	37416045	37433175	17131	2	19649	uc012gqz.1	0	ENSMUSG00000032128	Robo3	roundabout guidance receptor 3	uc012gqz.1;uc009ouw.1	19649;19649	0;0
chr7	25175646	25184144	8499	*	8.8	8.4	9.11	-0.71	1.26e-09	2.24e-08	330.67	346.28	523	583.83	Distal Intergenic	7	25155069	25156630	1562	1	434147	uc029wdy.1	20577	ENSMUSG00000074274	D930028M14Rik	RIKEN cDNA D930028M14 gene	NA	NA	NA
chr19	25655383	25686344	30962	*	10.29	10.02	10.51	-0.49	1.27e-09	2.26e-08	1044.69	1030.98	1363	1552.01	Promoter (<=1kb)	19	25671134	25672239	1106	2	100503074	uc008hbl.2	0	ENSMUSG00000101089	2610016A17Rik	RIKEN cDNA 2610016A17 gene	uc008hbl.2;uc008hbm.1	100503074;226049	0;0
chr10	42978643	43026337	47695	*	10.56	10.32	10.76	-0.44	1.28e-09	2.27e-08	1274.03	1279.17	1648	1819.6	3' UTR	10	43002500	43174530	172031	2	109205	uc007ezf.1	148193	ENSMUSG00000038248	Sobp	sine oculis binding protein	uc007ezf.1;uc007ezg.1	109205;109205	0;0
chr3	141447789	141472387	24599	*	9.58	9.27	9.84	-0.56	1.29e-09	2.29e-08	632.01	606.23	873	958.45	Promoter (<=1kb)	3	141465564	141680798	215235	1	22253	uc008roc.1	0	ENSMUSG00000059921	Unc5c	unc-5 netrin receptor C	uc008roc.1;uc008roe.2;uc008rof.2;uc012cyo.2	22253;22253;22253;22253	0;0;0;0
chr13	48257708	48273134	15427	*	9.2	8.87	9.48	-0.61	1.3e-09	2.29e-08	469.34	463.99	719	704.49	Promoter (<=1kb)	13	48261427	48264036	2610	1	15904	uc007qid.1	0	ENSMUSG00000021379	Id4	inhibitor of DNA binding 4	uc007qid.1;uc007qie.1;uc007qib.1	15904;320315;320614	0;0;0
chr2	25288329	25293225	4897	*	8.5	8.02	8.86	-0.84	1.31e-09	2.32e-08	276.01	244.26	419	510.85	Promoter (<=1kb)	2	25289911	25291193	1283	1	227618	uc008irg.2	0	ENSMUSG00000026961	Lrrc26	leucine rich repeat containing 26	uc008irh.3;uc008iri.3;uc008irk.3;uc008irg.2;uc008irj.1;uc008irf.2;uc008ird.2;uc008ire.2	14810;14810;14810;227618;320354;78217;99152;99152	0;0;0;0;0;0;15863;15818
chr15	82206036	82229964	23929	*	9.68	9.39	9.92	-0.53	1.37e-09	2.42e-08	662.68	676.86	947	986.67	Promoter (<=1kb)	15	82206952	82212815	5864	2	435145	uc029sua.1	0	ENSMUSG00000096883	Shisa8	shisa family member 8	uc011zwr.1;uc007wyi.1;uc029sua.1;uc007wym.2;uc007wyn.2;uc007wyo.2;uc007wyj.1;uc007wyk.1;uc007wyl.1	20788;20788;435145;66570;66570;66570;72049;72049;72049	58767;58767;0;14372;14783;14783;0;0;0
chr18	37134522	37157461	22940	*	9.77	9.47	10.02	-0.55	1.38e-09	2.44e-08	715.35	700.4	969	1108.3	Promoter (<=1kb)	18	37143969	37187661	43693	1	353237	uc008epk.3	0	ENSMUSG00000102697	Pcdhac2	protocadherin alpha subfamily C, 2	uc008eoy.3;uc056zgg.2;uc056zgh.2;uc008eou.1;uc008eot.3;uc008eox.4;uc012bbw.2;uc008epb.4;uc008epc.4;uc008eoz.3;uc008epg.1;uc012bbx.1;uc008eph.3;uc008epf.3;uc008epe.3;uc008eow.3;uc008epi.3;uc012bbv.1;uc008eov.3;uc008epd.3;uc008epj.3;uc008epk.3	100384868;103611158;103611159;116731;116731;12936;12937;12937;12939;12941;12942;12942;12942;12943;192161;192163;192164;353234;353234;353235;353236;353237	0;0;0;0;0;0;0;0;0;0;0;0;0;0;0;0;0;0;0;0;0;0
chr2	127478805	127492802	13998	*	9.04	8.69	9.33	-0.65	1.43e-09	2.51e-08	425.34	398.27	638	650.97	Promoter (<=1kb)	2	127456498	127482499	26002	2	56461	uc008mfl.1	0	ENSMUSG00000079056	Kcnip3	Kv channel interacting protein 3, calsenilin	uc008mfl.1;uc008mfm.2;uc008mfn.2;uc008mfo.1	56461;56461;56461;56461	0;0;0;0
chr7	35101906	35141971	40066	*	10.26	10.01	10.47	-0.46	1.43e-09	2.51e-08	1031.36	1025.1	1362	1474.17	Promoter (<=1kb)	7	35119293	35121928	2636	1	12606	uc009gjl.3	0	ENSMUSG00000034957	Cebpa	CCAAT/enhancer binding protein (C/EBP), alpha	uc009gjl.3	12606	0
chr9	37448467	37465883	17417	*	9.77	9.47	10.02	-0.54	1.44e-09	2.52e-08	732.68	690.59	985	1087.87	Distal Intergenic	9	37416045	37433175	17131	2	19649	uc012gqz.1	-15292	ENSMUSG00000032128	Robo3	roundabout guidance receptor 3	NA	NA	NA
chr5	130442714	130453728	11015	*	8.8	8.4	9.11	-0.71	1.49e-09	2.6e-08	350.67	326.66	531	574.1	Promoter (<=1kb)	5	130448125	130840645	392521	1	140904	uc008zuo.2	0	ENSMUSG00000060371	Caln1	calneuron 1	uc008zum.2;uc008zuo.2;uc008zup.2	140904;140904;140904	0;0;0
chr7	139575941	139587704	11764	*	9.12	8.74	9.43	-0.68	1.52e-09	2.66e-08	431.34	425.73	623	752.17	Promoter (<=1kb)	7	139579376	139582797	3422	2	14912	uc012fvu.1	0	ENSMUSG00000041309	Nkx6-2	NK6 homeobox 2	uc012fvu.1;uc009kfq.2;uc009kfr.2;uc009kfs.2	14912;212111;212111;212111	0;0;0;0
chr12	17317749	17335301	17553	*	9.25	8.91	9.52	-0.61	1.54e-09	2.69e-08	482.01	480.67	706	759.95	Promoter (<=1kb)	12	17284721	17324730	40010	2	68775	uc007ncr.2	0	ENSMUSG00000020566	Atp6v1c2	ATPase, H+ transporting, lysosomal V1 subunit C2	uc007ncr.2;uc007ncs.2;uc007nct.2	68775;68775;68775	0;0;0
chr9	45131583	45149709	18127	*	9.32	8.95	9.61	-0.65	1.58e-09	2.75e-08	518.68	473.8	715	843.63	Promoter (<=1kb)	9	45107176	45135606	28431	2	100038468	uc012gsb.1	0	ENSMUSG00000074385	Gm10684	predicted gene 10684	uc012gsb.1;uc009pff.1;uc009pfh.1;uc009pfg.1	100038468;100038468;399548;72821	0;0;0;13707
chr6	118191929	118203752	11824	*	8.88	8.5	9.18	-0.68	1.61e-09	2.8e-08	358.67	366.88	556	605.24	Promoter (<=1kb)	6	118151748	118197744	45997	2	19713	uc009dlm.1	0	ENSMUSG00000030110	Ret	ret proto-oncogene	uc009dlm.1;uc009dln.1	19713;19713	0;0
chr8	77428861	77458674	29814	*	9.77	10.01	9.49	0.52	1.63e-09	2.83e-08	1040.02	1018.23	705	734.65	Exon (uc009mhm.1/78514, exon 2 of 23)	8	77250366	77517907	267542	2	78514	uc009mhm.1	59233	ENSMUSG00000037148	Arhgap10	Rho GTPase activating protein 10	uc009mhm.1;uc009mhn.1;uc012gge.1	78514;78514;78514	0;0;0
chr2	38915479	38941220	25742	*	9.63	9.34	9.87	-0.53	1.64e-09	2.84e-08	654.02	644.49	944	933.15	Promoter (<=1kb)	2	38723374	38926503	203130	2	14536	uc012buu.1	0	ENSMUSG00000063972	Nr6a1	nuclear receptor subfamily 6, group A, member 1	uc012buu.1;uc008jnv.1	14536;241327	0;0
chr11	70455356	70480419	25064	*	9.67	9.39	9.91	-0.53	1.66e-09	2.87e-08	669.35	668.03	946	980.83	Promoter (<=1kb)	11	70459622	70466199	6578	1	574428	uc007juy.1	0	ENSMUSG00000040829	Zmynd15	zinc finger, MYND-type containing 15	uc007juy.1;uc007juz.1;uc007jva.1;uc007juw.1;uc007jux.1;uc011xxt.1;uc011xxu.1;uc007juv.2	574428;574428;574428;66102;66102;66102;66102;66172	0;0;0;0;0;0;0;3425
chr2	170482808	170509370	26563	*	9.92	9.64	10.15	-0.51	1.67e-09	2.88e-08	818.02	773.97	1088	1186.15	Promoter (<=1kb)	2	170496428	170519070	22643	1	109054	uc008occ.2	0	ENSMUSG00000052033	Pfdn4	prefoldin 4	uc029uik.1;uc008occ.2;uc008ocd.2;uc008oce.2;uc008ocb.2	100502946;109054;109054;109054;13081	0;0;-1860;-1860;0
chr5	138749244	138758739	9496	*	8.45	8.01	8.78	-0.77	1.67e-09	2.88e-08	258.67	257.01	431	448.58	Promoter (<=1kb)	5	138755081	138810063	54983	1	80752	uc009afv.2	0	ENSMUSG00000025854	Fam20c	family with sequence similarity 20, member C	uc009afv.2;uc012efn.1	80752;80752	0;0
chr11	37225862	37242257	16396	*	9.24	8.89	9.52	-0.63	1.71e-09	2.94e-08	501.34	450.26	709	761.9	Distal Intergenic	11	36006656	36944241	937586	2	23964	uc011xtd.2	-281621	ENSMUSG00000049336	Tenm2	teneurin transmembrane protein 2	NA	NA	NA
chr11	98525323	98558645	33323	*	10.32	10.08	10.52	-0.44	1.71e-09	2.94e-08	1087.36	1074.15	1443	1492.66	Promoter (<=1kb)	11	98464693	98546031	81339	2	22780	uc007lgm.1	0	ENSMUSG00000018168	Ikzf3	IKAROS family zinc finger 3	uc007lgm.1;uc007lgn.1;uc007lgo.2;uc007lgp.2;uc007lgq.2;uc011yec.1	22780;22780;69376;69376;69376;69376	0;0;0;0;0;0
chr13	45958863	45973535	14673	*	9.12	8.78	9.4	-0.62	1.77e-09	3.03e-08	428.68	449.28	661	689.89	Promoter (<=1kb)	13	45549755	45964991	415237	2	20238	uc011yyv.3	0	ENSMUSG00000046876	Atxn1	ataxin 1	uc011yyv.3;uc011yyw.3;uc011yyx.3	20238;20238;20238	0;0;0
chr6	4493720	4678222	184503	*	12.38	12.26	12.5	-0.24	1.84e-09	3.15e-08	4975.45	4841.02	5720	5836.35	Promoter (<=1kb)	6	4505618	4515019	9402	1	12843	uc009avl.2	0	ENSMUSG00000029661	Col1a2	collagen, type I, alpha 2	uc009avl.2;uc009avm.2;uc009avn.1;uc009avp.2;uc009avq.2;uc009avr.2;uc009avs.2;uc009avt.2;uc009avo.1	12843;12843;12843;20392;20392;20392;20392;20392;213819	0;0;0;0;0;0;0;0;0
chr9	34482273	34499429	17157	*	9.34	9.01	9.61	-0.6	1.88e-09	3.22e-08	523.35	508.13	742	819.31	Promoter (<=1kb)	9	34486126	34510605	24480	1	67703	uc009osf.1	0	ENSMUSG00000032036	Kirrel3	kirre like nephrin family adhesion molecule 3	uc009osf.1;uc009osg.1;uc009osh.2;uc009osi.2;uc009osj.2;uc012gqb.1	67703;67703;67703;67703;67703;67703	0;0;0;0;0;0
chr3	8663367	8672630	9264	*	8.91	8.52	9.21	-0.69	1.95e-09	3.33e-08	383.34	352.16	562	624.7	Promoter (<=1kb)	3	8663359	8667038	3680	2	15213	uc008oop.1	0	ENSMUSG00000040289	Hey1	hairy/enhancer-of-split related with YRPW motif 1	uc008oop.1	15213	0
chr5	33958517	34000543	42027	*	10.6	10.38	10.79	-0.41	1.96e-09	3.34e-08	1294.03	1363.53	1774	1757.33	Promoter (<=1kb)	5	33995984	34005916	9933	1	269642	uc008xbs.1	0	ENSMUSG00000048142	Nat8l	N-acetyltransferase 8-like	uc008xbs.1;uc008xbq.2;uc008xbr.3;uc057bty.1;uc008xbp.2	269642;381633;381633;381633;381633	0;0;0;0;0
chr7	34781573	34830745	49173	*	10.59	10.37	10.78	-0.41	1.98e-09	3.37e-08	1311.36	1331.16	1724	1782.63	Promoter (<=1kb)	7	34674468	34812711	138244	2	68947	uc009gjh.2	0	ENSMUSG00000060402	Chst8	carbohydrate sulfotransferase 8	uc009gjh.2	68947	0
chr15	74501637	74519357	17721	*	9.23	8.88	9.51	-0.63	1.99e-09	3.39e-08	493.34	449.28	692	770.65	Promoter (<=1kb)	15	74516196	74540560	24365	1	107831	uc011zua.1	0	ENSMUSG00000034730	Adgrb1	adhesion G protein-coupled receptor B1	uc011zua.1;uc007wco.1	107831;107831	0;0
chr7	51618241	51630246	12006	*	9.08	8.71	9.37	-0.65	2.07e-09	3.52e-08	440.01	399.25	633	686.97	Promoter (<=1kb)	7	51621830	51671126	49297	1	140919	uc009hcf.2	0	ENSMUSG00000030500	Slc17a6	solute carrier family 17 (sodium-dependent inorganic phosphate cotransporter), member 6	uc009hcf.2	140919	0
chr3	127150392	127167598	17207	*	9.32	8.99	9.58	-0.59	2.09e-09	3.54e-08	500.68	516.96	738	793.03	Promoter (<=1kb)	3	127161305	127168290	6986	1	100862268	uc008rhc.2	0	ENSMUSG00000097456	LOC100862268	uncharacterized LOC100862268	uc008rhc.2;uc033hzm.1;uc008rgt.2;uc008rgx.2;uc008rgy.2;uc012cxg.2;uc008rgz.1;uc008rha.2;uc008rhb.1	100862268;100862268;109676;109676;109676;109676;109676;109676;109676	0;0;0;0;0;0;0;0;0
chr11	95912177	95927216	15040	*	9.4	9.08	9.66	-0.58	2.14e-09	3.63e-08	563.35	515.98	795	823.2	Promoter (<=1kb)	11	95863559	95914871	51313	2	14422	uc007lax.1	0	ENSMUSG00000013418	B4galnt2	beta-1,4-N-acetyl-galactosaminyl transferase 2	uc007lax.1;uc011ydc.1	14422;14422	0;0
chr4	152110895	152184133	73239	*	11.29	11.1	11.46	-0.35	2.26e-09	3.82e-08	2182.05	2218.92	2696	2925.96	Promoter (<=1kb)	4	152158867	152162469	3603	1	15206	uc008vzw.1	0	ENSMUSG00000028940	Hes2	hes family bHLH transcription factor 2	uc008vzw.1;uc056zyp.1;uc008vzg.2;uc008vzi.3;uc008vzh.2;uc008vzj.2;uc008vzm.1;uc008vzn.1;uc008vzo.1;uc008vzp.1;uc008vzq.1;uc008vzr.1;uc008vzs.1;uc008vzt.1;uc008vzu.1;uc008vzv.1;uc008vzx.2;uc008vzy.2;uc056zyo.1;uc008vzk.2	15206;15206;269608;269608;269608;269608;56226;56226;56226;56226;56226;56226;56226;56226;56226;56226;70025;70025;85030;85030	0;0;0;0;0;0;0;0;0;0;0;0;0;0;0;0;0;0;0;0
chr8	88413170	88529806	116637	*	12.09	11.95	12.22	-0.27	2.28e-09	3.85e-08	3934.76	3960.12	4611	4934.33	Promoter (<=1kb)	8	88521344	88594887	73544	1	93960	uc009mro.2	0	ENSMUSG00000031661	Nkd1	naked cuticle 1	uc009mro.2;uc012gia.1	93960;93960	0;0
chr19	56710681	56732043	21363	*	9.5	9.2	9.75	-0.55	2.31e-09	3.9e-08	590.01	589.55	848	876.72	Promoter (<=1kb)	19	56722372	56724862	2491	1	11554	uc008hze.2	0	ENSMUSG00000035283	Adrb1	adrenergic receptor, beta 1	uc008hze.2	11554	0
chr12	3000156	3019929	19774	*	8.91	9.23	8.51	0.72	2.39e-09	4.02e-08	650.68	548.35	384	344.46	Distal Intergenic	12	3235526	3250374	14849	1	74173	uc007mwj.2	-215597	ENSMUSG00000079179	Rab10os	RAB10, member RAS oncogene family, opposite strand	NA	NA	NA
chr2	24465487	24484085	18599	*	9.35	9.01	9.63	-0.61	2.43e-09	4.08e-08	537.35	496.36	741	841.69	Promoter (<=1kb)	2	24420551	24475599	55049	2	18510	uc008ipb.2	0	ENSMUSG00000026976	Pax8	paired box 8	uc008ipb.2	18510	0
chr18	79988246	80010820	22575	*	9.29	9.55	8.96	0.59	2.44e-09	4.09e-08	772.02	728.85	502	494.31	Distal Intergenic	18	80046895	80119640	72746	1	93737	uc008fsj.2	-36075	ENSMUSG00000056214	Pard6g	par-6 family cell polarity regulator gamma	NA	NA	NA
chr8	11718915	11731430	12516	*	8.86	8.49	9.16	-0.67	2.46e-09	4.12e-08	358.01	361.97	556	587.72	Promoter (<=1kb)	8	11728105	11823061	94957	1	54126	uc009kvu.2	0	ENSMUSG00000031511	Arhgef7	Rho guanine nucleotide exchange factor (GEF7)	uc009kvu.2;uc009kvv.2	54126;54126	0;0
chr19	45279891	45312401	32511	*	9.85	9.58	10.09	-0.51	2.47e-09	4.13e-08	752.68	777.9	1127	1046.03	Distal Intergenic	19	45233728	45235236	1509	2	16814	uc008hqv.1	-44655	ENSMUSG00000025216	Lbx1	ladybird homeobox 1	NA	NA	NA
chr7	46386734	46399852	13119	*	8.79	8.41	9.09	-0.68	2.48e-09	4.13e-08	345.34	336.47	544	548.8	Promoter (<=1kb)	7	46396468	46433353	36886	1	16502	uc009gyo.2	0	ENSMUSG00000058975	Kcnc1	potassium voltage gated channel, Shaw-related subfamily, member 1	uc009gyo.2;uc009gyn.2	16502;16502	0;0
chr4	11171599	11209695	38097	*	9.95	10.17	9.69	0.48	2.49e-09	4.14e-08	1142.69	1164.39	824	827.09	Promoter (<=1kb)	4	11191351	11204779	13429	1	12448	uc008rzd.2	0	ENSMUSG00000028212	Ccne2	cyclin E2	uc008rzd.2;uc008rze.1;uc008rzf.1;uc008rza.1;uc008rzb.1;uc008rzg.2;uc008rzh.2	12448;12448;12448;60599;60599;72656;72656	0;0;0;0;0;0;0
chr14	49806221	49817874	11654	*	8.12	8.49	7.62	0.87	2.67e-09	4.45e-08	369.34	349.22	185	208.23	Distal Intergenic	14	49682019	49783367	101349	2	67419	uc007tkk.2	-22854	ENSMUSG00000036242	Armh4	armadillo-like helical domain containing 4	NA	NA	NA
chr6	70934143	70963295	29153	*	9.99	9.72	10.21	-0.49	2.73e-09	4.53e-08	858.69	829.89	1143	1225.07	Promoter (<=1kb)	6	70956606	70961066	4461	1	232077	uc012ene.1	0	ENSMUSG00000055874	Foxi3	forkhead box I3	uc012ene.1	232077	0
chr1	75446437	75467326	20890	*	9.38	9.02	9.66	-0.64	2.79e-09	4.63e-08	506.68	531.68	728	894.23	Promoter (<=1kb)	1	75450510	75474340	23831	1	241118	uc007bpg.1	0	ENSMUSG00000033007	Asic4	acid-sensing (proton-gated) ion channel family member 4	uc007bpg.1;uc007bpd.1;uc007bpe.1;uc007bpf.1	241118;69080;69080;69080	0;10494;10290;10290
chr16	35133880	35160856	26977	*	10.02	9.74	10.25	-0.51	2.81e-09	4.65e-08	859.35	850.49	1136	1303.89	Promoter (<=1kb)	16	35155636	35304549	148914	1	224129	uc007zbj.1	0	ENSMUSG00000022840	Adcy5	adenylate cyclase 5	uc007zbj.1	224129	0
chr2	37772784	37801466	28683	*	9.91	9.63	10.15	-0.52	2.82e-09	4.66e-08	778.02	805.36	1063	1207.55	Promoter (<=1kb)	2	37776249	37799103	22855	1	241324	uc008jnf.2	0	ENSMUSG00000035403	Crb2	crumbs family member 2	uc008jng.2;uc008jnh.2;uc008jni.2;uc008jnf.2	227801;227801;227801;241324	0;0;0;0
chr12	8291660	8313089	21430	*	9.91	9.64	10.13	-0.5	2.93e-09	4.84e-08	808.02	783.78	1082	1166.69	Promoter (<=1kb)	12	8297918	8301954	4037	2	238057	uc007mzl.1	0	ENSMUSG00000037660	Gdf7	growth differentiation factor 7	uc007mzl.1;uc057bax.1;uc007mzo.2	238057;238057;58240	0;0;-344
chr2	154548324	154553813	5490	*	8.26	7.8	8.61	-0.81	3.07e-09	5.07e-08	222.67	221.7	377	401.87	Promoter (<=1kb)	2	154551776	154553276	1501	1	70362	uc012cgx.1	0	ENSMUSG00000078129	Actl10	actin-like 10	uc008njh.1;uc008nji.1;uc012cgx.1;uc008njj.2	56846;56846;70362;75480	0;0;0;0
chr19	59440349	59479238	38890	*	10.85	10.47	11.16	-0.69	3.18e-09	5.24e-08	1485.37	1344.89	2131	2446.24	Promoter (<=1kb)	19	59458690	59465357	6668	1	13797	uc008ibl.1	0	ENSMUSG00000043969	Emx2	empty spiracles homeobox 2	uc008ibl.1;uc012bod.1	13797;329078	0;0
chr1	91795523	91807514	11992	*	9.17	8.82	9.44	-0.62	3.3e-09	5.43e-08	460.01	446.33	660	733.68	Promoter (<=1kb)	1	91801461	91848034	46574	1	13345	uc007cbd.2	0	ENSMUSG00000007805	Twist2	twist basic helix-loop-helix transcription factor 2	uc007cbd.2	13345	0
chr4	41722183	41735005	12823	*	9.07	8.69	9.37	-0.68	3.34e-09	5.48e-08	420.68	406.12	600	722	Promoter (<=1kb)	4	41714798	41723163	8366	2	53598	uc008sji.2	0	ENSMUSG00000028447	Dctn3	dynactin 3	uc008sjk.2;uc008sjl.2;uc012dcg.2;uc033ibk.1;uc033ibl.1;uc033ibm.1;uc033ibn.1;uc057lhk.1;uc008sji.2;uc012dcd.1;uc012dce.1;uc012dcf.1;uc008sjj.1;uc029uqk.1	18391;18391;18391;18391;18391;18391;18391;18391;53598;53598;550619;550619;550619;550619	6354;6354;6354;6354;6354;6354;6354;6354;0;0;0;0;0;0
chr5	132518879	132556802	37924	*	10.02	9.77	10.24	-0.47	3.36e-09	5.5e-08	882.69	859.32	1180	1238.69	Promoter (<=1kb)	5	131437682	132542343	1104662	2	319974	uc008zuv.1	0	ENSMUSG00000029673	Auts2	autism susceptibility candidate 2	uc008zuv.1;uc008zuw.1;uc008zuy.1	319974;319974;319974	0;0;0
chr7	108949714	108954076	4363	*	7.97	7.46	8.35	-0.89	3.52e-09	5.75e-08	174	177.55	310	343.49	Promoter (<=1kb)	7	108950338	109022753	72416	1	22141	uc009jdd.1	0	ENSMUSG00000031028	Tub	tubby bipartite transcription factor	uc009jdd.1	22141	0
chr3	102004795	102016220	11426	*	9.13	8.78	9.41	-0.64	3.54e-09	5.79e-08	441.34	436.53	636	728.81	Promoter (<=1kb)	3	102010145	102015492	5348	1	18072	uc008qrq.2	0	ENSMUSG00000048540	Nhlh2	nescient helix loop helix 2	uc008qrq.2;uc008qro.2	18072;18072	0;0
chr9	56792823	56804711	11889	*	8.9	8.53	9.2	-0.67	3.68e-09	6.01e-08	343.34	394.34	573	602.32	Distal Intergenic	9	56848659	56851963	3305	2	382075	uc009ptj.1	47252	ENSMUSG00000045620	Odf3l1	outer dense fiber of sperm tails 3-like 1	NA	NA	NA
chr1	178829220	178868313	39094	*	10.39	10.16	10.6	-0.44	3.69e-09	6.01e-08	1176.69	1104.56	1499	1605.53	Exon (uc007dvh.2/269152, exon 6 of 15)	1	178529125	178932857	403733	1	269152	uc007dvh.2	300095	ENSMUSG00000026494	Kif26b	kinesin family member 26B	uc007dvh.2	269152	0
chr6	28116341	28164396	48056	*	10.66	10.44	10.85	-0.41	3.72e-09	6.05e-08	1357.36	1422.39	1779	1914.96	Promoter (<=1kb)	6	27275121	28126426	851306	2	14823	uc009bcj.1	0	ENSMUSG00000024211	Grm8	glutamate receptor, metabotropic 8	uc009bcj.1;uc009bck.1;uc009bcl.1	14823;14823;14823	0;0;0
chr2	180017603	180026465	8863	*	8.54	8.12	8.87	-0.75	3.77e-09	6.13e-08	259.34	297.23	450	486.52	Promoter (<=1kb)	2	180024987	180035461	10475	1	241846	uc008ohy.1	0	ENSMUSG00000039108	Lsm14b	LSM family member 14B	uc008ohy.1;uc008ohz.1;uc008oia.1	241846;241846;241846	0;0;-1435
chr11	105965621	105970084	4464	*	7.68	7.09	8.09	-0.99	3.78e-09	6.13e-08	140	133.41	259	285.1	Promoter (<=1kb)	11	105967945	105989964	22020	1	11421	uc007lxu.2	0	ENSMUSG00000020681	Ace	angiotensin I converting enzyme (peptidyl-dipeptidase A) 1	uc007lxt.2;uc007lxu.2;uc007lxv.3	100379610;11421;11421	0;0;0
chr12	73577400	73593192	15793	*	9.25	8.9	9.52	-0.62	3.89e-09	6.3e-08	460.01	496.36	685	786.22	Promoter (<=1kb)	12	73584796	73778185	193390	1	18755	uc007nwn.3	0	ENSMUSG00000021108	Prkch	protein kinase C, eta	uc007nwn.3;uc011ynt.3	18755;18755	0;0
chr1	162466316	162489022	22707	*	9.5	9.2	9.74	-0.54	3.9e-09	6.3e-08	569.35	605.25	851	861.15	Promoter (<=1kb)	1	161987302	162478034	490733	2	103967	uc007dga.2	0	ENSMUSG00000040265	Dnm3	dynamin 3	uc007dga.2;uc007dgb.2;uc007dgg.2	103967;103967;103967	0;0;0
chr7	113762091	113774446	12356	*	9.09	8.74	9.37	-0.63	3.92e-09	6.34e-08	425.34	432.6	628	697.68	Promoter (<=1kb)	7	113765998	113929876	163879	1	233744	uc009jhu.2	0	ENSMUSG00000038156	Spon1	spondin 1, (f-spondin) extracellular matrix protein	uc009jhu.2;uc009jhv.2	233744;233744	0;0
chr11	49602642	49613640	10999	*	8.75	8.37	9.05	-0.68	3.97e-09	6.4e-08	330.01	329.6	519	539.07	Promoter (<=1kb)	11	49609679	49652739	43061	1	14257	uc007iqu.2	0	ENSMUSG00000020357	Flt4	FMS-like tyrosine kinase 4	uc007iqu.2	14257	0
chr7	31230099	31248564	18466	*	8.86	9.16	8.48	0.69	4.07e-09	6.55e-08	612.01	535.6	359	354.19	Distal Intergenic	7	31263736	31265935	2200	1	100043827	uc057bzm.1	-15172	ENSMUSG00000101554	Scgb2b1	secretoglobin, family 2B, member 1	NA	NA	NA
chr13	54735715	54770900	35186	*	10.25	10	10.47	-0.48	4.07e-09	6.55e-08	1025.36	1018.23	1330	1514.06	Promoter (<=1kb)	13	54758860	54766440	7581	2	104069	uc007qpc.1	0	ENSMUSG00000034891	Sncb	synuclein, beta	uc007qpc.1;uc007qoz.2;uc007qpa.2;uc007qpb.2	104069;268663;26913;26913	0;0;0;0
chr4	150023264	150037683	14420	*	9.2	8.87	9.46	-0.59	4.14e-09	6.65e-08	463.34	472.82	702	706.43	Distal Intergenic	4	149979474	150009023	29550	2	100198	uc008vxi.2	-14241	ENSMUSG00000028980	H6pd	hexose-6-phosphate dehydrogenase (glucose 1-dehydrogenase)	NA	NA	NA
chr4	82526298	82551962	25665	*	9.99	9.71	10.21	-0.5	4.16e-09	6.66e-08	876.69	803.4	1143	1232.85	Distal Intergenic	4	82495984	82505779	9796	2	18028	uc008tki.3	-20519	ENSMUSG00000008575	Nfib	nuclear factor I/B	NA	NA	NA
chr17	34658416	34682449	24034	*	9.79	9.49	10.04	-0.55	4.18e-09	6.7e-08	740.02	701.38	975	1133.6	Promoter (<=1kb)	17	34670535	34719815	49281	1	81877	uc012aqk.1	0	ENSMUSG00000033327	Tnxb	tenascin XB	uc008cdh.4;uc012aqj.2;uc012aqk.1	12915;12915;81877	11270;11270;0
chr15	89049877	89070085	20209	*	9.55	9.22	9.82	-0.6	4.22e-09	6.74e-08	625.35	569.94	832	975.97	Promoter (<=1kb)	15	89059726	89069878	10153	1	406218	uc011zxq.1	0	ENSMUSG00000058441	Panx2	pannexin 2	uc011zxq.1;uc007xfa.2;uc007xfb.1;uc007xey.1	406218;406218;69120;83456	0;0;5769;0
chr2	18566826	18633829	67004	*	11.05	10.86	11.23	-0.37	4.23e-09	6.74e-08	1812.71	1904.03	2321	2466.68	Exon (uc033hlo.1/uc033hlo.1, exon 1 of 1)	2	18672462	18676216	3755	1	12238	uc008ilx.1	-38633	ENSMUSG00000051154	Commd3	COMM domain containing 3	NA	NA	NA
chr19	31749275	31778032	28758	*	9.96	9.7	10.18	-0.48	4.26e-09	6.79e-08	848.69	813.21	1136	1181.28	Promoter (<=1kb)	19	30564487	31765033	1200547	2	19091	uc008hep.2	0	ENSMUSG00000052920	Prkg1	protein kinase, cGMP-dependent, type I	uc008hep.2	19091	0
chr5	28101314	28138732	37419	*	10.23	9.99	10.43	-0.44	4.36e-09	6.94e-08	998.69	1035.89	1359	1403.14	Distal Intergenic	5	28165696	28172166	6471	1	13799	uc008wtv.1	-26964	ENSMUSG00000039095	En2	engrailed 2	NA	NA	NA
chr4	61553194	61581397	28204	*	9.95	10.17	9.69	0.48	4.42e-09	7.02e-08	1156.03	1142.81	845	805.68	Intron (uc008tbb.2/100039089, intron 1 of 6)	4	61224307	61595832	371526	2	100039089	uc008tbb.2	14435	ENSMUSG00000089873	Mup13	major urinary protein 13	uc008tbb.2;uc008tbd.2;uc008tbh.4;uc008tbg.4;uc029uuv.1;uc008tbc.2;uc008tbi.4;uc012dfl.1;uc029uux.1	100039089;100039116;100039116;100039150;100039150;100048884;100048884;100048885;100048885	0;0;0;0;0;0;0;0;0
chr1	172552355	172577146	24792	*	9.65	9.36	9.89	-0.53	4.42e-09	7.02e-08	677.35	638.6	920	980.83	Promoter (<=1kb)	1	172555938	172563717	7780	1	240916	uc007dqs.2	0	ENSMUSG00000049598	Vsig8	V-set and immunoglobulin domain containing 8	uc007dqs.2;uc007dqt.2;uc007dqr.1;uc057khj.1;uc007dqu.1	240916;240916;71319;71319;74748	0;0;0;0;0
chr15	75993351	76006155	12805	*	9.15	8.81	9.42	-0.61	4.49e-09	7.12e-08	442.01	455.16	655	714.22	Promoter (<=1kb)	15	75993769	75999153	5385	1	332110	uc007whz.1	0	ENSMUSG00000063704	Mapk15	mitogen-activated protein kinase 15	uc007wic.2;uc007wid.2;uc007whz.1;uc007wia.1;uc007wib.1	105732;105732;332110;332110;332110	0;0;0;0;0
chr10	60683956	60689950	5995	*	8.56	8.13	8.89	-0.76	4.51e-09	7.14e-08	285.34	274.67	435	515.72	5' UTR	10	60302750	60696490	393741	2	22295	uc033fpk.2	6540	ENSMUSG00000012819	Cdh23	cadherin 23 (otocadherin)	uc033fpk.2;uc057kiv.1;uc057kiw.1;uc007fez.1	22295;22295;22295;22295	0;0;0;0
chr5	140595751	140618022	22272	*	9.6	9.31	9.84	-0.53	4.52e-09	7.14e-08	630.01	643.51	889	947.75	Promoter (<=1kb)	5	140607341	140615545	8205	1	16848	uc009ahu.1	0	ENSMUSG00000029570	Lfng	LFNG O-fucosylpeptide 3-beta-N-acetylglucosaminyltransferase	uc009ahu.1;uc009ahv.1;uc009ahw.3;uc012egc.2	16848;16848;78339;78339	0;0;31009;31009
chr14	111670913	111724783	53871	*	10.82	10.62	11	-0.38	4.6e-09	7.25e-08	1596.04	1548.93	1994	2107.62	Promoter (<=1kb)	14	111675115	111683135	8021	1	75409	uc011zpr.1	0	ENSMUSG00000033214	Slitrk5	SLIT and NTRK-like family, member 5	uc011zpr.1	75409	0
chr2	119308286	119352806	44521	*	11.02	10.63	11.33	-0.69	4.67e-09	7.36e-08	1666.04	1505.77	2390	2744	Promoter (<=1kb)	2	119321199	119325574	4376	2	100043609	uc057bod.1	0	ENSMUSG00000074912	Gm14207	predicted gene 14207	uc057bod.1;uc057boe.2;uc008ltq.1;uc057bof.1;uc008ltr.2;uc008lts.4	100043609;100043609;100043609;100043609;54485;69065	0;0;0;0;0;0
chr17	28340481	28390615	50135	*	10.52	10.29	10.72	-0.43	4.72e-09	7.43e-08	1312.7	1194.8	1667	1713.54	Promoter (<=1kb)	17	28331671	28350346	18676	2	21678	uc008bqr.3	0	ENSMUSG00000002249	Tead3	TEA domain family member 3	uc008bqr.3;uc008bqs.3;uc008bqt.3;uc012aog.2;uc008bqu.1;uc008bqv.1;uc008bqw.1;uc008bqx.1;uc008bqy.1	21678;21678;21678;21678;22157;22157;22157;22157;22157	0;0;0;0;0;0;0;0;0
chr2	155769850	155780453	10604	*	8.58	8.18	8.9	-0.72	4.75e-09	7.47e-08	290.01	289.38	462	491.39	Promoter (<=1kb)	2	155775342	155818366	43025	1	17391	uc008nlj.2	0	ENSMUSG00000027612	Mmp24	matrix metallopeptidase 24	uc008nlj.2	17391	0
chr4	101289058	101297619	8562	*	8.83	8.46	9.13	-0.68	4.94e-09	7.75e-08	350.01	352.16	529	593.56	Distal Intergenic	4	101151974	101265282	113309	2	16451	uc008tvk.1	-23776	ENSMUSG00000028530	Jak1	Janus kinase 1	NA	NA	NA
chr9	67044467	67055454	10988	*	9.02	8.67	9.3	-0.63	5e-09	7.84e-08	410.68	402.19	603	657.78	Promoter (<=1kb)	9	67022593	67049213	26621	2	22003	uc009qfp.1	0	ENSMUSG00000032366	Tpm1	tropomyosin 1, alpha	uc012gvr.1;uc012gvs.1;uc009qfp.1;uc012gvt.1;uc012gvu.1;uc012gvv.1;uc012gvw.1;uc012gvx.1;uc009qfq.2;uc009qfr.2;uc057lzu.1;uc009qfs.1	22003;22003;22003;22003;22003;22003;22003;22003;22003;22003;22003;22003	-596;-596;0;0;0;-596;0;-596;0;0;0;0
chr1	82276327	82315102	38776	*	10.36	10.13	10.56	-0.44	5.11e-09	7.99e-08	1139.36	1094.75	1463	1558.82	Promoter (<=1kb)	1	82233105	82291439	58335	2	16367	uc007brp.2	0	ENSMUSG00000055980	Irs1	insulin receptor substrate 1	uc007brp.2;uc007brq.4	16367;76867	0;-1477
chr15	103166517	103185760	19244	*	9.54	9.24	9.78	-0.54	5.15e-09	8.04e-08	594.68	617.02	851	907.85	Promoter (<=1kb)	15	103153290	103167982	14693	2	71726	uc007xxi.1	0	ENSMUSG00000036061	Smug1	single-strand selective monofunctional uracil DNA glycosylase	uc007xxh.1;uc007xxi.1;uc007xxj.1;uc007xxk.1	71726;71726;71726;71726	-3080;0;-3080;-3080
chr10	23345852	23359631	13780	*	9.17	8.81	9.47	-0.65	5.19e-09	8.1e-08	448.01	450.26	638	775.52	Promoter (<=1kb)	10	23104168	23349903	245736	2	14051	uc007ept.1	0	ENSMUSG00000010461	Eya4	EYA transcriptional coactivator and phosphatase 4	uc007ept.1;uc007epu.1	14051;14051	0;0
chr10	80338141	80358775	20635	*	9.64	9.36	9.87	-0.52	5.21e-09	8.11e-08	637.35	673.92	927	949.7	Promoter (<=1kb)	10	80356459	80365489	9031	1	216166	uc007gcx.2	0	ENSMUSG00000035486	Plk5	polo like kinase 5	uc007gcx.2;uc007gcy.2;uc007gcv.3;uc033frc.1;uc007gct.2;uc007gcu.2	216166;216166;66548;66548;70335;70335	0;0;0;0;7996;7996
chr15	89137871	89149271	11401	*	8.76	8.37	9.06	-0.69	5.22e-09	8.11e-08	342.67	318.81	551	515.72	Promoter (<=1kb)	15	89130584	89140652	10069	2	29857	uc007xfm.1	0	ENSMUSG00000022610	Mapk12	mitogen-activated protein kinase 12	uc007xfp.3;uc007xfm.1;uc007xfl.2;uc007xfn.1;uc007xfo.2	19094;29857;29857;29857;29857	0;0;0;-412;0
chr13	31547646	31572045	24400	*	9.8	9.52	10.03	-0.51	5.24e-09	8.13e-08	738.68	733.75	998	1096.63	Promoter (<=1kb)	13	31558170	31560976	2807	1	15220	uc007pzj.3	0	ENSMUSG00000038415	Foxq1	forkhead box Q1	uc007pzj.3;uc007pzl.1;uc007pzm.1	15220;71307;71307	0;0;0
chr6	31551686	31574858	23173	*	9.89	9.6	10.13	-0.53	5.24e-09	8.13e-08	775.35	772.01	1030	1208.53	Promoter (<=1kb)	6	31519493	31563937	44445	2	27205	uc009bgh.2	0	ENSMUSG00000025608	Podxl	podocalyxin-like	uc009bgh.2	27205	0
chr2	61641508	61682025	40518	*	10.37	10.14	10.57	-0.43	5.25e-09	8.13e-08	1124.69	1129.08	1469	1564.66	5' UTR	2	61578586	61654171	75586	1	21353	uc008juw.3	62922	ENSMUSG00000064289	Tank	TRAF family member-associated Nf-kappa B activator	uc008juw.3;uc057ldb.1;uc008jux.2;uc008juy.3;uc008juz.3;uc008jva.3;uc008jvb.3	21353;21353;21353;21353;21353;21353;21353	0;0;0;0;0;0;0
chr18	84716885	84748492	31608	*	9.8	9.53	10.02	-0.49	5.42e-09	8.38e-08	723.35	755.34	1038	1040.19	Promoter (<=1kb)	18	84720242	84740436	20195	1	240479	uc008fuv.1	0	ENSMUSG00000047992	Fam69c	family with sequence similarity 69, member C	uc008fuv.1	240479	0
chr2	180770412	180787510	17099	*	9.56	9.25	9.82	-0.57	5.54e-09	8.56e-08	610.01	609.17	836	969.16	Promoter (<=1kb)	2	180774381	180776900	2520	2	140489	uc008okb.2	0	ENSMUSG00000045493	Bhlhe23	basic helix-loop-helix family, member e23	uc008okb.2	140489	0
chr5	22737362	22755120	17759	*	9.38	9.07	9.64	-0.56	5.58e-09	8.6e-08	538.01	540.51	768	823.2	Promoter (<=1kb)	5	22746193	23275597	529405	1	269629	uc008wpv.2	0	ENSMUSG00000106379	Lhfpl3	lipoma HMGIC fusion partner-like 3	uc008wpv.2;uc012dst.1;uc008wpt.2;uc012dss.2	269629;269629;320719;330052	0;0;0;0
chr7	141289105	141295918	6814	*	8.59	8.18	8.9	-0.73	5.7e-09	8.78e-08	269.34	309	466	492.36	Promoter (<=1kb)	7	141292006	141295001	2996	1	13491	uc009kkm.1	0	ENSMUSG00000025496	Drd4	dopamine receptor D4	uc009kkm.1;uc009kkn.2;uc009kko.3;uc033jdc.1;uc009kkp.2	13491;54006;54006;54006;54006	0;31807;31807;31807;42865
chr15	102676764	102705677	28914	*	9.86	9.59	10.09	-0.49	5.75e-09	8.85e-08	747.35	796.54	1053	1120.95	Downstream (1-2kb)	15	102671792	102671866	75	2	751542	uc012aad.1	-4898	ENSMUSG00000076009	Mir688	microRNA 688	uc007xws.2;uc007xwt.2;uc012aad.1	67488;67488;751542	16501;16501;-4898
chr4	107430333	107448600	18268	*	9.51	9.21	9.76	-0.55	5.78e-09	8.88e-08	589.35	598.38	826	911.75	Promoter (<=1kb)	4	107434591	107439094	4504	1	230587	uc008tzu.1	0	ENSMUSG00000034762	Glis1	GLIS family zinc finger 1	uc008tzu.1;uc008tzv.1;uc029uyn.1	230587;230587;230587	0;0;0
chr5	64147864	64181714	33851	*	10.3	10.07	10.49	-0.43	5.81e-09	8.9e-08	1071.36	1071.2	1414	1471.25	Promoter (<=1kb)	5	64159451	64351486	192036	1	57915	uc008xmm.2	0	ENSMUSG00000029174	Tbc1d1	TBC1 domain family, member 1	uc008xmm.2;uc008xml.2;uc057buh.1	57915;57915;57915	0;0;0
chr9	111293622	111321106	27485	*	9.81	9.54	10.04	-0.5	5.85e-09	8.96e-08	742.68	743.56	1011	1087.87	Promoter (<=1kb)	9	111311739	111357961	46223	1	320429	uc012hbq.1	0	ENSMUSG00000062296	Trank1	tetratricopeptide repeat and ankyrin repeat containing 1	uc012hbq.1;uc009rvt.2	320429;320429	0;0
chrX	141717927	141728863	10937	*	8.36	7.92	8.69	-0.78	6.12e-09	9.36e-08	234.01	249.16	394	433.01	Promoter (<=1kb)	20	141710998	141725217	14220	2	16370	uc009ulp.1	0	ENSMUSG00000054667	Irs4	insulin receptor substrate 4	uc009ulp.1	16370	0
chr1	178511754	178534458	22705	*	9.76	9.48	9.99	-0.51	6.38e-09	9.74e-08	718.02	709.23	972	1058.68	Promoter (<=1kb)	1	178529125	178716500	187376	1	269152	uc007dvf.1	0	ENSMUSG00000026494	Kif26b	kinesin family member 26B	uc007dvf.1;uc007dvh.2	269152;269152	0;0
chr11	114781631	114802124	20494	*	9.54	9.24	9.79	-0.55	6.39e-09	9.74e-08	603.35	607.21	838	928.29	Promoter (<=1kb)	11	114798924	114806745	7822	1	217302	uc007mfu.1	0	ENSMUSG00000034677	Gpr142	G protein-coupled receptor 142	uc007mfu.1;uc007mfv.1;uc057kms.1;uc007mfq.1;uc007mfr.1;uc007mfs.1;uc007mft.1	217302;217302;217302;286942;72014;72014;72014	0;0;-1412;0;0;0;0
chr9	121630716	121648234	17519	*	9.4	9.09	9.66	-0.57	6.6e-09	1e-07	560.01	532.66	775	841.69	Promoter (<=1kb)	9	121642716	121672954	30239	1	22354	uc009sdl.2	0	ENSMUSG00000032528	Vipr1	vasoactive intestinal peptide receptor 1	uc009sdl.2;uc009sdi.1	22354;69032	0;0
chr1	40665986	40692986	27001	*	10.04	9.77	10.28	-0.51	6.63e-09	1.01e-07	879.35	864.22	1145	1335.02	Promoter (<=1kb)	1	40681712	40727160	45449	1	226999	uc007aum.1	0	ENSMUSG00000026062	Slc9a2	solute carrier family 9 (sodium/hydrogen exchanger), member 2	uc007aum.1;uc007aun.1	226999;226999	0;0
chr17	24648536	24660294	11759	*	8.75	8.37	9.05	-0.68	6.63e-09	1.01e-07	340.67	322.73	519	541.99	Promoter (<=1kb)	17	24657330	24658425	1096	2	381073	uc008axm.2	0	ENSMUSG00000071230	Npw	neuropeptide W	uc008axm.2;uc008axj.2;uc008axk.2;uc008axl.2	381073;65962;65962;65962	0;-3579;0;0
chr4	120635412	120672882	37471	*	10.19	9.95	10.39	-0.44	6.73e-09	1.02e-07	972.69	1001.56	1307	1378.81	Promoter (<=1kb)	4	120666563	120667820	1258	1	56222	uc008unl.1	0	ENSMUSG00000070803	Cited4	Cbp/p300-interacting transactivator, with Glu/Asp-rich carboxy-terminal domain, 4	uc008unl.1	56222	0
chr11	69324997	69348251	23255	*	10.15	9.88	10.38	-0.51	6.73e-09	1.02e-07	920.02	960.36	1225	1448.87	Promoter (<=1kb)	11	69326258	69333041	6784	1	16499	uc007jps.1	0	ENSMUSG00000018470	Kcnab3	potassium voltage-gated channel, shaker-related subfamily, beta member 3	uc007jps.1;uc007jpt.1;uc007jpu.1;uc007jpp.1;uc011xwv.1;uc029rmh.2;uc007jpx.3;uc029rmi.2;uc007jpq.2;uc007jpr.1;uc007jpv.2	16499;16499;16499;216846;216846;216848;216848;216848;245828;245828;80515	0;0;0;-1124;-1124;0;0;0;0;0;0
chr7	99614402	99633306	18905	*	9.41	9.1	9.66	-0.56	6.76e-09	1.02e-07	520.01	579.74	808	813.47	Promoter (<=1kb)	7	99624067	99627103	3037	2	100503386	uc012fpx.1	0	ENSMUSG00000096606	Tpbgl	trophoblast glycoprotein-like	uc012fpx.1	100503386	0
chr9	56618525	56639629	21105	*	9.41	9.11	9.65	-0.55	6.87e-09	1.04e-07	553.35	548.35	790	821.25	Promoter (<=1kb)	9	56618464	56635648	17185	2	235402	uc009pth.2	0	ENSMUSG00000049556	Lingo1	leucine rich repeat and Ig domain containing 1	uc009pth.2;uc009pti.2	235402;235402	0;0
chr7	49900611	49922779	22169	*	9.71	9.42	9.95	-0.53	6.91e-09	1.04e-07	698.68	670.97	931	1049.92	Promoter (<=1kb)	7	49910299	49959493	49195	1	104245	uc009hbv.3	0	ENSMUSG00000039728	Slc6a5	solute carrier family 6 (neurotransmitter transporter, glycine), member 5	uc009hbv.3;uc012fle.1	104245;104245	0;0
chr1	134642022	134660670	18649	*	9.36	9.04	9.62	-0.57	7.02e-09	1.06e-07	529.35	524.81	743	826.12	Promoter (<=1kb)	1	134646681	134741976	95296	1	20980	uc007csi.1	0	ENSMUSG00000026452	Syt2	synaptotagmin II	uc007csi.1;uc007csj.1	20980;20980	0;0
chr2	36356174	36378325	22152	*	9.03	9.31	8.67	0.64	7.09e-09	1.07e-07	655.35	616.04	434	381.44	Promoter (<=1kb)	2	36376778	36377698	921	1	258949	uc008jln.1	0	ENSMUSG00000068950	Olfr338	olfactory receptor 338	uc008jln.1	258949	0
chr19	44663354	44684095	20742	*	9.48	9.18	9.73	-0.55	7.39e-09	1.11e-07	604.68	557.18	848	849.47	Distal Intergenic	19	44757394	44837871	80478	1	18504	uc008hqa.3	-73299	ENSMUSG00000004231	Pax2	paired box 2	NA	NA	NA
chr7	133037046	133044859	7814	*	7.93	8.32	7.4	0.91	7.47e-09	1.12e-07	323.34	314.89	186	152.77	Intron (uc009kcy.1/13017, intron 2 of 10)	7	132987011	133123483	136473	2	13017	uc009kcy.1	78624	ENSMUSG00000030970	Ctbp2	C-terminal binding protein 2	uc009kcy.1;uc009kcz.1	13017;13017	0;0
chr9	122852115	122866951	14837	*	8.6	8.91	8.21	0.71	7.57e-09	1.13e-07	491.34	473.8	299	292.89	Promoter (<=1kb)	9	122848910	122866006	17097	2	235682	uc009sfe.2	0	ENSMUSG00000047036	Zfp445	zinc finger protein 445	uc009sfe.2	235682	0
chr2	52667559	52686894	19336	*	9.44	9.13	9.69	-0.56	7.57e-09	1.13e-07	576.01	546.39	791	863.09	Promoter (<=1kb)	2	52428320	52675859	247540	2	12298	uc008jrc.1	0	ENSMUSG00000017412	Cacnb4	calcium channel, voltage-dependent, beta 4 subunit	uc008jrc.1;uc033hmw.1;uc008jrd.2	12298;12298;12298	0;0;0
chr5	150947536	150957740	10205	*	8.79	8.41	9.08	-0.67	7.58e-09	1.13e-07	352.01	330.58	554	531.28	Promoter (<=1kb)	5	150952607	150986981	34375	1	16591	uc009auk.2	0	ENSMUSG00000058488	Kl	klotho	uc009auk.2;uc009aul.2	16591;16591	0;0
chr2	125712997	125735577	22581	*	9.63	9.33	9.87	-0.54	7.66e-09	1.14e-07	606.01	683.73	905	970.13	Promoter (<=1kb)	2	125627447	125724148	96702	2	271849	uc008mcv.1	0	ENSMUSG00000035109	Shc4	SHC (Src homology 2 domain containing) family, member 4	uc008mcv.1;uc012cdc.1;uc008mcy.1;uc008mcz.1	271849;271849;271849;70354	0;0;0;47293
chr3	14990824	15009156	18333	*	8.91	9.19	8.55	0.64	7.79e-09	1.16e-07	587.35	584.65	388	362.95	Exon (uc008oqu.1/77127, exon 5 of 5)	3	14971201	15002727	31527	1	77127	uc008oqu.1	19623	ENSMUSG00000098008	A930001A20Rik	RIKEN cDNA A930001A20 gene	uc008oqu.1;uc029ujw.1	77127;77127	0;0
chr7	49970589	49983686	13098	*	9.11	8.78	9.38	-0.6	7.98e-09	1.19e-07	431.34	447.32	642	692.81	Promoter (<=1kb)	7	49975350	50280036	304687	1	338352	uc009hbx.1	0	ENSMUSG00000055409	Nell1	NEL-like 1	uc009hbx.1;uc012flf.1;uc009hby.1	338352;338352;338352	0;0;0
chr6	91402007	91420226	18220	*	9.32	9	9.57	-0.57	8.05e-09	1.2e-07	509.35	517.94	730	794.98	Promoter (<=1kb)	6	91363983	91411369	47387	2	22421	uc009cxz.1	0	ENSMUSG00000030093	Wnt7a	wingless-type MMTV integration site family, member 7A	uc009cxz.1	22421	0
chr15	72531593	72559882	28290	*	9.85	9.57	10.09	-0.52	8.29e-09	1.23e-07	755.35	764.16	1011	1165.71	Promoter (<=1kb)	15	72512119	72546279	34161	2	223604	uc007wbk.1	0	ENSMUSG00000036760	Kcnk9	potassium channel, subfamily K, member 9	uc007wbk.1	223604	0
chr4	124982432	124991355	8924	*	8.59	8.19	8.91	-0.71	8.39e-09	1.24e-07	282.67	303.12	459	500.15	Promoter (<=1kb)	4	124986430	125009099	22670	1	192199	uc008urn.1	0	ENSMUSG00000028871	Rspo1	R-spondin 1	uc008urn.1	192199	0
chr2	6866699	6891882	25184	*	9.67	9.39	9.91	-0.52	8.43e-09	1.25e-07	690.02	648.41	926	994.46	Promoter (<=1kb)	2	6539694	6884996	345303	2	14007	uc008igo.3	0	ENSMUSG00000002107	Celf2	CUGBP, Elav-like family member 2	uc008igo.3;uc008igr.4;uc012bpa.3;uc008igs.4;uc008igt.4;uc008igu.4;uc008igv.4;uc008igp.3;uc008igx.1	14007;14007;14007;14007;14007;14007;14007;14007;14007	0;0;0;0;0;0;0;0;0
chr7	31034147	31064173	30027	*	9.86	9.59	10.09	-0.5	8.49e-09	1.25e-07	783.35	757.3	1033	1148.2	Promoter (<=1kb)	7	31040258	31040317	60	2	102465635	uc033iym.1	0	ENSMUSG00000098783	Mir7050	microRNA 7050	uc033iym.1;uc009ghp.3;uc009ghq.3;uc033iyk.1;uc033iyl.1;uc009gho.3;uc009ghz.1;uc009ght.2;uc009ghu.2;uc009ghv.2;uc009ghw.2;uc009ghx.2;uc009ghy.2;uc009ghr.1;uc009ghs.1	102465635;18301;18301;18301;18301;18301;243914;56188;56188;56188;56188;56188;56188;57780;57780	0;0;0;0;0;0;0;0;0;0;0;0;0;0;0
chr2	160906101	160921006	14906	*	9.09	8.75	9.37	-0.62	8.55e-09	1.26e-07	428.01	431.62	619	705.46	Promoter (<=1kb)	2	160906438	160912339	5902	2	280635	uc008nrk.2	0	ENSMUSG00000050700	Emilin3	elastin microfibril interfacer 3	uc008nrk.2;uc008nrl.2;uc008nrh.2;uc008nri.2;uc008nrj.2	280635;280635;64899;64899;64899	0;0;0;17933;17933
chr6	67509202	67544862	35661	*	10.22	9.99	10.43	-0.44	8.7e-09	1.28e-07	1027.36	1003.52	1338	1413.84	Promoter (<=1kb)	6	67534059	67535822	1764	2	56753	uc009cfq.1	0	ENSMUSG00000051397	Tacstd2	tumor-associated calcium signal transducer 2	uc009cfq.1	56753	0
chr8	14088399	14109073	20675	*	9.73	9.42	9.98	-0.57	8.74e-09	1.29e-07	700.68	667.05	919	1107.33	Promoter (<=1kb)	8	14027565	14090327	62763	2	234086	uc009kyx.1	0	ENSMUSG00000051978	Erich1	glutamate rich 1	uc009kyx.1;uc009kyy.3;uc012gac.2	234086;244310;244310	0;0;0
chr7	142789635	142921117	131483	*	11.92	11.77	12.05	-0.28	8.76e-09	1.29e-07	3532.75	3466.7	4109	4364.12	Promoter (<=1kb)	7	142892776	142899966	7191	2	21823	uc009koi.1	0	ENSMUSG00000000214	Th	tyrosine hydroxylase	uc009koi.1	21823	0
chr12	95666789	95709066	42278	*	10.31	10.08	10.5	-0.42	8.81e-09	1.29e-07	1060.69	1101.61	1466	1432.33	Promoter (<=1kb)	12	95692226	95785215	92990	1	399558	uc007olc.3	0	ENSMUSG00000047414	Flrt2	fibronectin leucine rich transmembrane protein 2	uc007olc.3;uc057koy.1	399558;399558	0;0
chr15	101012789	101056035	43247	*	10.54	10.3	10.74	-0.44	9e-09	1.32e-07	1231.36	1295.84	1608	1810.84	Promoter (<=1kb)	15	101050192	101054399	4208	2	668225	uc029sve.2	0	ENSMUSG00000095440	Fignl2	fidgetin-like 2	uc007xsh.2;uc007xsj.3;uc057bhc.1;uc029sve.2	20273;20273;20273;668225	0;0;0;0
chr3	52090796	52108104	17309	*	9.37	9.07	9.62	-0.55	9.05e-09	1.32e-07	552.01	522.85	782	795.95	Promoter (<=1kb)	3	51687611	52105006	417396	2	433586	uc008pef.3	0	ENSMUSG00000061143	Maml3	mastermind like transcriptional coactivator 3	uc008pef.3	433586	0
chr7	45162578	45190111	27534	*	10.05	9.8	10.26	-0.46	9.19e-09	1.34e-07	868.69	920.14	1209	1243.56	Promoter (<=1kb)	7	45176349	45179597	3249	2	100039953	uc012fkd.1	0	ENSMUSG00000095276	Gfy	golgi-associated olfactory signaling regulator	uc012fkd.1;uc033izg.1;uc009gtz.1;uc009gua.1;uc009gub.1;uc009gtv.1;uc009gtw.2;uc033izf.1;uc009gtx.2;uc009gty.1	100039953;102465638;114640;114640;384619;68845;68845;68845;72961;72961	0;0;0;0;0;8275;8275;6632;0;0
chr2	181033705	181041506	7802	*	8.21	7.75	8.55	-0.8	9.21e-09	1.34e-07	215.34	215.81	358	394.08	Promoter (<=1kb)	2	181022311	181039177	16867	2	11438	uc008okq.1	0	ENSMUSG00000027577	Chrna4	cholinergic receptor, nicotinic, alpha polypeptide 4	uc008okq.1	11438	0
chr17	25949403	25954342	4940	*	8.16	7.67	8.52	-0.85	9.32e-09	1.36e-07	206.67	201.1	333	401.87	Promoter (<=1kb)	17	25946392	25952565	6174	2	100034748	uc008bcv.1	0	ENSMUSG00000025727	A930017K11Rik	RIKEN cDNA A930017K11 gene	uc008bcv.1;uc008bcy.1;uc008bcu.1	100034748;50817;621239	0;31364;-4472
chrX	133679229	133691680	12452	*	8.53	8.1	8.86	-0.77	9.36e-09	1.36e-07	283.34	264.86	423	508.9	Promoter (<=1kb)	20	133687780	133707262	19483	1	102632590	uc009uey.1	0	ENSMUSG00000096978	Gm26851	predicted gene, 26851	uc009uey.1;uc009uew.3;uc009uex.3	102632590;279653;279653	0;0;0
chr6	85498637	85516853	18217	*	9.41	9.1	9.66	-0.56	9.43e-09	1.37e-07	540.01	560.13	772	844.61	Promoter (<=1kb)	6	85511122	85513542	2421	2	13656	uc009cpy.1	0	ENSMUSG00000071341	Egr4	early growth response 4	uc009cpy.1;uc009cpw.3;uc009cpx.3;uc033isv.2	13656;330369;330369;330369	0;0;0;0
chr15	30164216	30180972	16757	*	9.36	9.05	9.62	-0.58	9.62e-09	1.4e-07	554.68	504.21	759	819.31	Promoter (<=1kb)	15	30172593	31029344	856752	1	18163	uc007vjz.2	0	ENSMUSG00000022240	Ctnnd2	catenin (cadherin associated protein), delta 2	uc007vjz.2;uc011zrs.2	18163;18163	0;0
chr14	29714062	29736999	22938	*	9.67	9.39	9.9	-0.5	9.86e-09	1.43e-07	685.35	658.22	959	946.78	Promoter (<=1kb)	14	28904943	29721864	816922	2	12294	uc057krw.1	0	ENSMUSG00000021991	Cacna2d3	calcium channel, voltage-dependent, alpha2/delta subunit 3	uc057krw.1	12294	0
chr4	141236126	141253790	17665	*	9.29	8.99	9.55	-0.56	9.89e-09	1.43e-07	498.68	516.96	737	759.95	Promoter (<=1kb)	4	141242884	141257562	14679	1	213649	uc008vob.1	0	ENSMUSG00000028919	Arhgef19	Rho guanine nucleotide exchange factor (GEF) 19	uc008vob.1	213649	0
chr16	18125495	18130898	5404	*	8.05	7.55	8.42	-0.87	1.01e-08	1.46e-07	199.34	175.59	323	361.97	Promoter (<=1kb)	16	18127706	18152408	24703	1	65079	uc007ymv.1	0	ENSMUSG00000043811	Rtn4r	reticulon 4 receptor	uc007ymv.1	65079	0
chr14	52311968	52341693	29726	*	9.89	9.64	10.11	-0.47	1.02e-08	1.47e-07	797.35	797.52	1092	1114.14	Promoter (<=1kb)	14	52311177	52316323	5147	2	50524	uc007tpe.2	0	ENSMUSG00000049532	Sall2	spalt like transcription factor 2	uc007tpe.2;uc007tpf.2	50524;50524	0;0
chr11	5051873	5068060	16188	*	9.22	8.9	9.48	-0.58	1.02e-08	1.47e-07	486.68	469.88	700	725.89	Promoter (<=1kb)	11	5058128	5060383	2256	1	75668	uc007hvs.1	0	ENSMUSG00000034209	Rasl10a	RAS-like, family 10, member A	uc007hvw.2;uc007hvx.2;uc007hvy.2;uc007hvs.1;uc007hvq.2;uc007hvr.2;uc007hvu.2;uc007hvv.2;uc007hvt.2	14030;14030;14030;75668;78926;78926;78926;78926;78926	31028;31028;31028;0;0;0;0;0;0
chr3	121255025	121283970	28946	*	10.07	9.82	10.28	-0.45	1.04e-08	1.49e-07	928.02	883.84	1239	1239.66	Promoter (<=1kb)	3	121201761	121283098	81338	2	99887	uc008rdt.1	0	ENSMUSG00000028132	Tmem56	transmembrane protein 56	uc008rdt.1;uc008rdu.2;uc008rdv.2;uc008rdw.2	99887;99887;99887;99887	0;0;0;0
chr7	109748450	109786948	38499	*	10.29	10.05	10.49	-0.44	1.12e-08	1.62e-07	1068.69	1055.51	1376	1501.41	Promoter (<=1kb)	7	109735836	109752263	16428	2	56786	uc009jec.1	0	ENSMUSG00000031021	Tmem9b	TMEM9 domain family, member B	uc009jec.1;uc009jed.1;uc009jef.1;uc009jeg.1	56786;56786;78593;78593	0;0;0;0
chr11	102941032	102975220	34189	*	10.2	9.96	10.4	-0.44	1.13e-08	1.63e-07	1024.02	974.09	1325	1386.59	Promoter (<=1kb)	11	102939264	102946461	7198	2	23829	uc007lsz.2	0	ENSMUSG00000045532	C1ql1	complement component 1, q subcomponent-like 1	uc007lsz.2;uc007lta.2	23829;69739	0;0
chr7	118109202	118117482	8281	*	7.76	8.16	7.21	0.94	1.14e-08	1.64e-07	301.34	269.76	154	143.04	Promoter (<=1kb)	7	118104374	118116147	11774	2	267019	uc009jjn.2	0	ENSMUSG00000008683	Rps15a	ribosomal protein S15A	uc009jjn.2;uc009jjo.2	267019;54208	0;12143
chr5	135845288	135874198	28911	*	9.99	9.75	10.2	-0.45	1.18e-08	1.68e-07	855.35	864.22	1169	1184.2	3' UTR	5	135818106	135874772	56667	1	58212	uc008zzb.1	27182	ENSMUSG00000039860	Srrm3	serine/arginine repetitive matrix 3	uc008zza.1;uc008zzb.1;uc008zzc.1	58212;58212;58212	38398;0;0
chr1	106709079	106716340	7262	*	8.36	7.94	8.69	-0.75	1.21e-08	1.73e-07	245.34	245.24	406	417.44	Promoter (<=1kb)	1	106538176	106714290	176115	2	12043	uc007cgw.3	0	ENSMUSG00000057329	Bcl2	B cell leukemia/lymphoma 2	uc007cgw.3;uc011wqb.3;uc007cgy.2	12043;12043;70750	0;0;43402
chr12	75814048	75829972	15925	*	9.19	8.86	9.46	-0.6	1.21e-08	1.73e-07	472.01	456.14	660	749.25	Promoter (<=1kb)	12	75818318	75891049	72732	1	319565	uc007nxm.1	0	ENSMUSG00000063450	Syne2	spectrin repeat containing, nuclear envelope 2	uc007nxm.1;uc007nxn.1;uc011ynv.1;uc007nxo.1;uc007nxp.1	319565;319565;319565;319565;319565	0;0;0;0;0
chr15	23950966	23962213	11248	*	8.02	8.38	7.52	0.86	1.21e-08	1.73e-07	340.01	327.64	172	195.58	Distal Intergenic	15	23036463	23474418	437956	1	320865	uc007vis.1	914503	ENSMUSG00000040420	Cdh18	cadherin 18	NA	NA	NA
chr15	89434892	89463254	28363	*	9.83	9.56	10.06	-0.5	1.21e-08	1.73e-07	717.35	795.55	1037	1097.6	Promoter (<=1kb)	15	89453911	89462447	8537	1	60597	uc007xgx.2	0	ENSMUSG00000022619	Mapk8ip2	mitogen-activated protein kinase 8 interacting protein 2	uc007xgv.2;uc007xgs.2;uc007xgt.2;uc007xgu.2;uc007xgx.2	12651;12651;12651;12651;60597	-4984;-4965;-4965;-4965;0
chr12	79991970	80040244	48275	*	10.66	10.46	10.84	-0.38	1.22e-08	1.74e-07	1417.37	1397.86	1801	1864.36	Distal Intergenic	12	79917019	79936264	19246	2	77290	uc056yrf.1	-55706	ENSMUSG00000112765	9430078K24Rik	RIKEN cDNA 9430078K24 gene	NA	NA	NA
chr10	73093691	73105802	12112	*	8.93	8.56	9.23	-0.67	1.22e-08	1.74e-07	403.34	350.2	567	632.48	Promoter (<=1kb)	10	73099342	74317264	1217923	1	11994	uc007fpe.1	0	ENSMUSG00000052613	Pcdh15	protocadherin 15	uc007fpe.1	11994	0
chr1	133151539	133189194	37656	*	10.17	9.94	10.37	-0.43	1.29e-08	1.83e-07	969.36	990.76	1307	1336	Distal Intergenic	1	133131344	133139800	8457	1	108954	uc007cps.2	20195	ENSMUSG00000046062	Ppp1r15b	protein phosphatase 1, regulatory subunit 15B	NA	NA	NA
chr11	115857591	115862141	4551	*	7.91	7.37	8.3	-0.92	1.29e-08	1.83e-07	156	175.59	282	346.41	Distal Intergenic	11	115824058	115855780	31723	1	217325	uc011yhq.1	33533	ENSMUSG00000020782	Llgl2	LLGL2 scribble cell polarity complex component	uc007mit.1;uc011yhq.1	217325;217325	33533;33533
chr7	143089414	143114685	25272	*	9.67	9.39	9.9	-0.52	1.29e-08	1.83e-07	686.02	654.3	916	1001.27	Promoter (<=1kb)	7	143107254	143427042	319789	1	16535	uc009kpb.1	0	ENSMUSG00000009545	Kcnq1	potassium voltage-gated channel, subfamily Q, member 1	uc009kpb.1;uc012fxu.1;uc012fxv.1;uc012fxw.1;uc009koz.1;uc009kpa.1;uc012fxt.1	16535;16535;16535;16535;56843;56843;56843	0;0;0;0;-2200;0;0
chr10	43864177	43881813	17637	*	8.59	8.91	8.19	0.72	1.29e-08	1.83e-07	474.68	484.59	273	311.38	3' UTR	10	43874190	43901736	27547	2	76563	uc007ezn.1	19923	ENSMUSG00000019863	Qrsl1	glutaminyl-tRNA synthase (glutamine-hydrolyzing)-like 1	uc007ezn.1;uc007ezo.1	76563;76563	0;0
chr18	36061873	36073078	11206	*	8.85	8.48	9.13	-0.65	1.3e-08	1.84e-07	362.01	354.12	536	587.72	Intron (uc012bbl.2/100042150, intron 1 of 9)	18	36017649	36197160	179512	2	100042150	uc012bbl.2	124082	ENSMUSG00000060275	Nrg2	neuregulin 2	uc012bbl.2	100042150	0
chr11	3100119	3200198	100080	*	14.15	14.23	14.07	0.15	1.32e-08	1.87e-07	19549.8	18798	17148	17320.3	Promoter (<=1kb)	11	3124021	3131945	7925	1	236604	uc007hrp.2	0	NA	Pisd-ps1	phosphatidylserine decarboxylase, pseudogene 1	uc007hrp.2;uc007hsc.2;uc007hsd.2;uc007hse.2;uc011xqo.1;uc007hsf.2;uc007hrs.1;uc007hrt.1;uc007hru.1;uc007hrv.1;uc007hrw.1;uc007hrx.1;uc007hsa.1;uc007hsb.1	236604;74203;74203;74203;74203;74203;78887;78887;78887;78887;78887;78887;78887;78887	0;-2155;-2385;-2385;-2797;-2821;0;0;0;0;0;0;0;0
chr13	63566660	63585912	19253	*	9.57	9.28	9.81	-0.53	1.33e-08	1.88e-07	606.68	637.62	856	937.05	Promoter (1-2kb)	13	63511532	63565520	53989	2	19206	uc007qxv.1	-1140	ENSMUSG00000021466	Ptch1	patched 1	uc007qxv.1;uc007qxx.1;uc007qxy.1	19206;19206;19206	-1140;-2125;-1386
chr17	5933858	5943406	9549	*	8.29	7.86	8.63	-0.77	1.35e-08	1.9e-07	238.01	226.6	400	390.19	Promoter (<=1kb)	17	5941280	6039390	98111	1	20975	uc008afk.3	0	ENSMUSG00000023805	Synj2	synaptojanin 2	uc008afk.3;uc008afl.3;uc008afm.3;uc008afj.1	20975;20975;20975;66616	0;0;0;92478
chr15	98883238	98901401	18164	*	9.62	9.34	9.85	-0.51	1.35e-08	1.9e-07	659.35	638.6	899	949.7	Promoter (<=1kb)	15	98891155	98898540	7386	2	13363	uc007xoh.3	0	ENSMUSG00000023000	Dhh	desert hedgehog	uc007xoh.3;uc011zzb.1;uc007xoi.1	13363;69159;74775	0;-1824;16697
chr4	13730810	13754131	23322	*	9.74	9.46	9.97	-0.51	1.37e-08	1.92e-07	732.68	673.92	966	1039.22	Promoter (<=1kb)	4	13743302	13895056	151755	1	12395	uc008sau.4	0	ENSMUSG00000006586	Runx1t1	RUNX1 translocation partner 1	uc008sau.4;uc008sav.2;uc008saw.4	12395;12395;12395	0;0;0
chr11	5860284	5863867	3584	*	7.76	7.22	8.15	-0.93	1.39e-08	1.95e-07	152.67	145.18	270	296.78	Promoter (<=1kb)	11	5861866	5872248	10383	1	11568	uc007hxg.3	0	ENSMUSG00000020473	Aebp1	AE binding protein 1	uc007hxg.3;uc007hxh.3;uc007hxj.3	11568;11568;11568	0;0;-3734
chr3	110137578	110150868	13291	*	8.93	8.59	9.21	-0.63	1.41e-08	1.98e-07	387.34	381.59	571	615.94	Promoter (<=1kb)	3	109780050	110143472	363423	2	80883	uc008raj.2	0	ENSMUSG00000059857	Ntng1	netrin G1	uc008rai.2;uc008raj.2;uc008rak.2;uc008ral.2;uc008ram.2;uc008ran.2;uc008rao.2;uc008rap.1;uc008raq.1;uc008rar.2	80883;80883;80883;80883;80883;80883;80883;80883;80883;80883	0;0;0;0;0;0;0;-1548;-1548;0
chr5	35272857	35287097	14241	*	9.12	8.79	9.39	-0.6	1.43e-08	2e-07	445.34	440.45	635	709.35	Promoter (<=1kb)	5	35278566	35281763	3198	1	11553	uc009vdd.1	0	ENSMUSG00000045318	Adra2c	adrenergic receptor, alpha 2c	uc009vdd.1	11553	0
chr16	11977089	12010844	33756	*	9.96	9.71	10.18	-0.47	1.43e-08	2e-07	843.35	826.95	1108	1208.53	Promoter (<=1kb)	16	11984113	11995390	11278	1	72555	uc007yfr.1	0	ENSMUSG00000022494	Shisa9	shisa family member 9	uc007yfr.1;uc007yfs.2;uc007yft.2	72555;72555;72555	0;0;0
chr12	70108659	70123055	14397	*	9.14	8.81	9.41	-0.59	1.44e-08	2.01e-07	431.34	466.93	704	651.94	Promoter (<=1kb)	12	70018740	70112035	93296	2	18080	uc007ntg.2	0	ENSMUSG00000021068	Nin	ninein	uc007ntg.2;uc007nth.2;uc007nti.2;uc011yng.2;uc011ynh.2;uc007ntj.2	18080;18080;18080;18080;18080;18080	0;0;0;0;0;0
chr11	121698971	121709062	10092	*	8.72	8.35	9.02	-0.68	1.45e-08	2.02e-07	342.67	308.02	529	512.8	Promoter (<=1kb)	11	121702427	121717389	14963	1	210029	uc007mwd.1	0	ENSMUSG00000039208	Metrnl	meteorin, glial cell differentiation regulator-like	uc007mwd.1;uc011yjn.1	210029;210029	0;0
chr5	24597844	24609710	11867	*	8.87	8.51	9.16	-0.65	1.47e-08	2.04e-07	351.34	375.71	538	604.26	Promoter (<=1kb)	5	24592622	24602002	9381	2	66993	uc008wsd.1	0	ENSMUSG00000028949	Smarcd3	SWI/SNF related, matrix associated, actin dependent regulator of chromatin, subfamily d, member 3	uc012dte.1;uc012dtf.1;uc008wsd.1	100910;100910;66993	11094;11094;0
chr13	105047708	105066090	18383	*	9.44	9.14	9.69	-0.55	1.5e-08	2.09e-07	594.01	533.64	811	843.63	Promoter (<=1kb)	13	104947153	105054930	107778	2	52882	uc007rtp.1	0	ENSMUSG00000021719	Rgs7bp	regulator of G-protein signalling 7 binding protein	uc007rtp.1	52882	0
chr9	58105881	58161719	55839	*	10.43	10.21	10.61	-0.4	1.51e-08	2.1e-07	1178.03	1197.75	1567	1565.64	Promoter (<=1kb)	9	58129088	58153997	24910	1	20897	uc009pwi.2	0	ENSMUSG00000032327	Stra6	stimulated by retinoic acid gene 6	uc009pwf.1;uc009pwi.2;uc009pwj.2;uc012guc.1;uc012gud.1;uc012gue.1;uc009pwk.2;uc009pwb.2;uc009pwc.2;uc009pwd.2;uc009pwg.2;uc009pwh.1	20897;20897;20897;20897;20897;26968;26968;382077;382077;382077;382077;382077	0;0;0;0;0;0;0;-3584;-3584;0;-3584;0
chr13	49205543	49237440	31898	*	9.9	9.65	10.12	-0.47	1.53e-08	2.12e-07	793.35	816.15	1082	1142.36	Promoter (<=1kb)	13	49202951	49215860	12910	2	68480	uc007qix.1	0	ENSMUSG00000037960	Card19	caspase recruitment domain family, member 19	uc007qiz.3;uc007qja.3;uc007qjb.1;uc007qix.1;uc007qiy.1	66329;66329;66329;68480;68480	0;0;0;0;0
chr1	7291347	7301069	9723	*	8.13	8.48	7.67	0.81	1.53e-08	2.12e-07	359.34	353.14	207	199.47	Distal Intergenic	1	7160085	7173628	13544	1	319263	uc007agd.1	131262	ENSMUSG00000051285	Pcmtd1	protein-L-isoaspartate (D-aspartate) O-methyltransferase domain containing 1	NA	NA	NA
chr11	102437923	102469478	31556	*	9.94	9.68	10.16	-0.48	1.54e-08	2.12e-07	858.02	776.92	1119	1166.69	Promoter (<=1kb)	11	102453646	102458434	4789	2	16399	uc007lrz.1	0	ENSMUSG00000034664	Itga2b	integrin alpha 2b	uc007lrv.2;uc007lrx.2;uc007lry.2;uc007lrz.1;uc007lsa.1;uc007lrw.2	14824;16399;16399;16399;16399;217219	7601;0;0;0;0;0
chr17	46435853	46462474	26622	*	9.69	9.42	9.92	-0.5	1.55e-08	2.14e-07	698.68	671.95	946	988.62	Promoter (<=1kb)	17	46432185	46438477	6293	2	108114	uc008csw.2	0	ENSMUSG00000067144	Slc22a7	solute carrier family 22 (organic anion transporter), member 7	uc008csx.2;uc008csy.2;uc008csw.2;uc008cst.1;uc008csu.1;uc008csv.1	106763;106763;108114;114570;114570;114570	0;0;0;6911;6911;6911
chr5	118023967	118042839	18873	*	9.38	9.09	9.63	-0.54	1.58e-08	2.18e-07	549.35	540.51	776	807.63	Promoter (<=1kb)	5	118027824	118061870	34047	1	57816	uc008zgc.1	0	ENSMUSG00000029359	Tesc	tescalcin	uc008zgc.1;uc012ecj.1;uc008zgd.1	57816;57816;57816	0;0;0
chr12	112139695	112151299	11605	*	8.46	8.05	8.78	-0.73	1.64e-08	2.25e-07	250.67	277.61	420	457.33	Promoter (<=1kb)	12	112146208	112181747	35540	1	668303	uc007pem.1	0	ENSMUSG00000021294	Kif26a	kinesin family member 26A	uc007pem.1	668303	0
chr4	36942555	36958520	15966	*	9.35	9.03	9.61	-0.58	1.67e-08	2.29e-07	532.68	515	726	840.71	Promoter (<=1kb)	4	35706647	36951744	1245098	2	242384	uc008shb.3	0	ENSMUSG00000045083	Lingo2	leucine rich repeat and Ig domain containing 2	uc008shb.3	242384	0
chr17	27530161	27540020	9860	*	7.9	8.27	7.39	0.88	1.67e-08	2.29e-07	308.01	309	174	161.53	Distal Intergenic	17	27556574	27563672	7099	1	15361	uc008boy.2	-16554	ENSMUSG00000046711	Hmga1	high mobility group AT-hook 1	NA	NA	NA
chr11	118903693	118917279	13587	*	8.92	8.57	9.2	-0.63	1.67e-08	2.29e-07	390.01	367.86	564	612.05	Promoter (<=1kb)	11	118489760	118909572	419813	2	52897	uc007mpl.1	0	ENSMUSG00000025576	Rbfox3	RNA binding protein, fox-1 homolog (C. elegans) 3	uc007mpl.1;uc007mpm.1;uc007mpn.1;uc007mpo.1;uc007mpp.1	52897;52897;52897;52897;52897	0;0;0;0;0
chr13	54293122	54310554	17433	*	8.97	8.61	9.25	-0.65	1.67e-08	2.29e-07	382.68	397.29	562	658.75	Distal Intergenic	13	54371349	54383917	12569	1	12890	uc029sbi.1	-60795	ENSMUSG00000025867	Cplx2	complexin 2	NA	NA	NA
chr11	69359920	69372733	12814	*	8.8	8.44	9.08	-0.65	1.69e-08	2.31e-07	354.67	339.41	537	548.8	Promoter (<=1kb)	11	69343273	69369426	26154	2	216848	uc029rmi.2	0	ENSMUSG00000018474	Chd3	chromodomain helicase DNA binding protein 3	uc029rmi.2	216848	0
chr7	130926891	130943101	16211	*	9.22	8.91	9.48	-0.57	1.69e-08	2.31e-07	487.34	475.76	690	740.49	Promoter (<=1kb)	7	130936203	130985658	49456	1	56213	uc009kau.2	0	ENSMUSG00000006205	Htra1	HtrA serine peptidase 1	uc009kau.2;uc009kav.2	56213;56213	0;-388
chr10	38825898	38837851	11954	*	8.44	8.77	8.02	0.74	1.72e-08	2.34e-07	462.68	409.06	256	264.67	Distal Intergenic	10	38820541	38821779	1239	2	215919	uc011xct.1	-4119	ENSMUSG00000094311	Rfpl4b	ret finger protein-like 4B	uc011xct.1	215919	-4119
chr8	92592491	93111109	518619	*	14.04	13.97	14.11	-0.14	1.72e-08	2.34e-07	16075.7	16060.2	17590	17851.5	Promoter (<=1kb)	8	92827297	92853421	26125	1	17390	uc009mue.2	0	ENSMUSG00000031740	Mmp2	matrix metallopeptidase 2	uc009mul.3;uc009mum.2;uc009mue.2;uc009muh.2;uc009muj.2;uc009muf.1;uc009mug.1;uc012gii.1;uc012gij.1;uc009muk.1;uc009muc.2;uc009mud.2;uc012gik.1	13884;13884;17390;20538;244595;270084;270084;270084;270084;382044;64379;64379;69543	0;0;0;0;0;0;0;0;0;0;0;0;0
chr7	34024020	34039073	15054	*	8.5	8.82	8.11	0.71	1.74e-08	2.37e-07	457.34	444.37	275	276.35	Promoter (2-3kb)	7	34021567	34022881	1315	1	11354	uc009giq.1	2453	ENSMUSG00000066583	Scgb1b27	secretoglobin, family 1B, member 27	uc009giq.1	11354	2453
chr12	85468841	85491355	22515	*	9.48	9.19	9.72	-0.53	1.76e-08	2.39e-07	560.68	611.14	849	839.74	Promoter (<=1kb)	12	85473901	85477269	3369	1	14281	uc007oha.3	0	ENSMUSG00000021250	Fos	FBJ osteosarcoma oncogene	uc007oha.3	14281	0
chr4	130270652	130287633	16982	*	9.2	8.89	9.46	-0.57	1.77e-08	2.4e-07	483.34	463.01	689	717.14	Promoter (<=1kb)	4	130253497	130275220	21724	2	230779	uc029uzq.1	0	ENSMUSG00000023232	Serinc2	serine incorporator 2	uc029uzq.1;uc008uzc.1	230779;230779	0;0
chr2	181665888	181682123	16236	*	9.3	8.99	9.56	-0.57	1.77e-08	2.4e-07	500.68	516.96	711	800.82	Promoter (<=1kb)	2	181669837	181671640	1804	2	20672	uc008ona.1	0	ENSMUSG00000046470	Sox18	SRY (sex determining region Y)-box 18	uc008ona.1;uc012cmu.2	20672;21400	0;0
chr13	117016201	117034925	18725	*	9.39	9.08	9.64	-0.57	1.78e-08	2.41e-07	560.01	518.93	755	843.63	Promoter (<=1kb)	13	116854824	117025277	170454	2	52552	uc007ryi.1	0	ENSMUSG00000021725	Parp8	poly (ADP-ribose) polymerase family, member 8	uc007ryi.1;uc007ryj.1;uc007ryk.1;uc007ryl.1	52552;52552;52552;52552	0;0;0;0
chr2	25575799	25581947	6149	*	8.5	8.09	8.83	-0.74	1.78e-08	2.41e-07	290.01	253.09	432	476.79	Promoter (<=1kb)	2	25575416	25580099	4684	2	381353	uc008isq.1	0	ENSMUSG00000029419	Ajm1	apical junction component 1	uc008isr.1;uc008iss.3;uc008ist.1;uc008iso.1;uc008isq.1;uc008isp.1	227624;227624;227624;381352;381353;75454	0;8425;0;-4483;0;-928
chr10	19835640	19863768	28129	*	10.04	9.79	10.24	-0.45	1.79e-08	2.42e-07	894.69	881.88	1178	1248.42	Promoter (<=1kb)	10	19847917	19851459	3543	2	76157	uc007enk.1	0	ENSMUSG00000050473	Slc35d3	solute carrier family 35, member D3	uc007enl.2;uc011xay.1;uc007enk.1	18634;18634;76157	0;0;0
chr1	72861286	72899857	38572	*	10.41	10.19	10.6	-0.41	1.8e-08	2.42e-07	1199.36	1139.87	1542	1560.77	Promoter (<=1kb)	1	72858065	72874865	16801	2	16011	uc007bkx.1	0	ENSMUSG00000026185	Igfbp5	insulin-like growth factor binding protein 5	uc007bkx.1	16011	0
chr12	86397664	86435157	37494	*	10.35	10.13	10.55	-0.42	1.82e-08	2.45e-07	1132.03	1108.48	1448	1543.26	Promoter (<=1kb)	12	86421644	86515522	93879	1	26380	uc007ohu.1	0	ENSMUSG00000021255	Esrrb	estrogen related receptor, beta	uc007oht.2;uc007ohu.1;uc007ohv.2	26380;26380;26380	0;0;0
chr17	17843043	17853130	10088	*	8.69	8.33	8.99	-0.66	1.83e-08	2.46e-07	320.01	321.75	501	513.77	Promoter (2-3kb)	17	17843326	17855188	11863	2	15116	uc008apr.2	2058	ENSMUSG00000003665	Has1	hyaluronan synthase 1	uc008apr.2;uc008aps.1;uc057biz.1;uc012alg.1;uc008app.2;uc057bja.1;uc057bjb.1;uc008apq.1	15116;15116;75202;75202;75202;75202;75202;75202	0;0;15885;12068;12068;11969;11969;5534
chr15	11022897	11040081	17185	*	9.49	9.19	9.73	-0.54	1.84e-08	2.47e-07	602.68	566.99	815	882.56	Promoter (<=1kb)	15	11033717	11037968	4252	2	239336	uc007vgy.1	0	ENSMUSG00000060735	Rxfp3	relaxin family peptide receptor 3	uc007vgx.1;uc007vgy.1	22293;239336	0;0
chr11	90377354	90396873	19520	*	9.46	9.16	9.7	-0.54	1.85e-08	2.48e-07	595.35	552.28	811	856.28	Promoter (<=1kb)	11	90336535	90389648	53114	2	217082	uc007kwq.1	0	ENSMUSG00000003949	Hlf	hepatic leukemia factor	uc007kwq.1;uc007kwr.1;uc007kws.1;uc007kwt.2	217082;217082;217082;217082	0;0;0;0
chr5	142804385	142826831	22447	*	9.66	9.38	9.91	-0.53	1.87e-08	2.5e-07	701.35	626.83	919	999.32	Promoter (<=1kb)	5	142724605	142817387	92783	2	231861	uc033inn.1	0	ENSMUSG00000039477	Tnrc18	trinucleotide repeat containing 18	uc033inn.1;uc009ajg.1	231861;231861	0;0
chr2	82040453	82070293	29841	*	9.89	9.62	10.11	-0.5	1.9e-08	2.54e-07	759.35	810.27	1040	1173.5	Promoter (<=1kb)	2	82053658	82259879	206222	1	241514	uc008khu.2	0	ENSMUSG00000070866	Zfp804a	zinc finger protein 804A	uc008khu.2	241514	0
chr6	136166872	136177208	10337	*	8.67	8.29	8.97	-0.69	1.91e-08	2.56e-07	305.34	318.81	470	536.15	Promoter (<=1kb)	6	135729795	136173511	443717	2	14812	uc009elq.2	0	ENSMUSG00000030209	Grin2b	glutamate receptor, ionotropic, NMDA2B (epsilon 2)	uc009elq.2;uc009elr.1;uc012eut.1;uc012euu.1	14812;14812;14812;14812	0;0;0;0
chr6	126160528	126168377	7850	*	8.57	8.16	8.89	-0.73	1.91e-08	2.56e-07	280.67	291.34	433	512.8	Promoter (<=1kb)	6	126101412	126164960	63549	2	18205	uc009duz.2	0	ENSMUSG00000049107	Ntf3	neurotrophin 3	uc009duz.2;uc012esx.1;uc012esy.1	18205;18205;18205	0;0;0
chr3	73045930	73080411	34482	*	10.02	9.77	10.23	-0.46	1.93e-08	2.57e-07	894.69	849.51	1155	1251.34	Promoter (<=1kb)	3	73048125	73056943	8819	2	386750	uc008pms.1	0	ENSMUSG00000048304	Slitrk3	SLIT and NTRK-like family, member 3	uc008pms.1;uc008pmt.1;uc008pmu.1	386750;386750;626082	0;0;0
chr3	98423550	98431608	8059	*	8.52	8.12	8.83	-0.71	1.93e-08	2.57e-07	283.34	273.69	437	473.87	5' UTR	3	98382481	98431949	49469	1	242109	uc012cui.1	41069	ENSMUSG00000050064	Zfp697	zinc finger protein 697	uc012cui.1	242109	0
chr7	81986431	82016907	30477	*	9.97	9.72	10.18	-0.47	1.94e-08	2.58e-07	850.69	830.87	1113	1209.5	Promoter (<=1kb)	7	81966662	81992299	25638	2	12173	uc009icu.1	0	ENSMUSG00000025105	Bnc1	basonuclin 1	uc009icu.1	12173	0
chr5	39639879	39650445	10567	*	8.51	8.11	8.82	-0.7	1.94e-08	2.58e-07	272.67	280.55	461	439.82	Promoter (<=1kb)	5	39613935	39644631	30697	2	15476	uc008xgy.2	0	ENSMUSG00000051022	Hs3st1	heparan sulfate (glucosamine) 3-O-sulfotransferase 1	uc008xgy.2	15476	0
chr4	119458584	119519780	61197	*	10.94	10.75	11.1	-0.35	1.97e-08	2.61e-07	1731.37	1710.79	2141	2250.66	Promoter (<=1kb)	4	119465283	119492598	27316	2	194237	uc008umo.4	0	ENSMUSG00000048899	Rimkla	ribosomal modification protein rimK-like family member A	uc008umo.4;uc008umn.2	194237;332934	0;35900
chr2	164165066	164183399	18334	*	9.46	9.16	9.71	-0.55	1.98e-08	2.63e-07	568.01	577.78	783	897.15	Promoter (<=1kb)	2	164163619	164171113	7495	2	16538	uc008ntv.1	0	ENSMUSG00000040164	Kcns1	K+ voltage-gated channel, subfamily S, 1	uc008ntv.1;uc012ciy.1;uc008ntw.2	16538;209232;209232	0;0;0
chr11	114056459	114076710	20252	*	9.51	9.22	9.75	-0.52	2.04e-08	2.7e-07	604.68	589.55	826	892.29	Promoter (<=1kb)	11	113780790	114065951	285162	2	237979	uc007mfe.1	0	ENSMUSG00000041592	Sdk2	sidekick cell adhesion molecule 2	uc007mfe.1;uc007mff.1;uc007mfg.1;uc011yhe.1	237979;237979;237979;237979	0;0;0;0
chr5	137021637	137034072	12436	*	8.86	8.49	9.15	-0.66	2.05e-08	2.71e-07	368.01	351.18	527	610.1	Promoter (<=1kb)	5	137026392	137033351	6960	1	381677	uc057lof.1	0	ENSMUSG00000037428	Vgf	VGF nerve growth factor inducible	uc009abm.1;uc057lof.1;uc009abl.1	11769;381677;381677	11988;0;0
chr9	107664183	107678968	14786	*	9.19	8.88	9.45	-0.58	2.1e-08	2.78e-07	476.68	463.99	672	729.79	Promoter (<=1kb)	9	107651155	107667399	16245	2	76257	uc009rmo.2	0	ENSMUSG00000010064	Slc38a3	solute carrier family 38, member 3	uc009rmr.1;uc009rms.1;uc009rmt.1;uc009rmu.1;uc009rmn.1;uc009rmo.2;uc009rmp.1;uc009rmq.2	14685;20350;20350;20350;76257;76257;76257;76257	0;0;0;0;-4655;0;0;0
chr3	97860550	97875753	15204	*	9.09	8.76	9.35	-0.58	2.16e-08	2.85e-07	438.68	430.64	638	665.57	Promoter (<=1kb)	3	97746672	97868248	121577	2	83679	uc008qph.2	0	ENSMUSG00000038170	Pde4dip	phosphodiesterase 4D interacting protein (myomegalin)	uc012cuf.2;uc012cug.2;uc012cuh.2;uc008qph.2;uc008qpi.2	83679;83679;83679;83679;83679	0;0;0;0;0
chr17	27493265	27526116	32852	*	10.14	9.89	10.36	-0.47	2.19e-08	2.89e-07	978.02	914.25	1233	1389.51	Promoter (<=1kb)	17	27422387	27503533	81147	2	268934	uc008bow.2	0	ENSMUSG00000063239	Grm4	glutamate receptor, metabotropic 4	uc008bow.2;uc056zdu.1;uc008box.1	268934;268934;268934	0;0;0
chr16	22273106	22294286	21181	*	9.11	9.37	8.79	0.58	2.34e-08	3.07e-07	656.68	669.99	446	441.76	Distal Intergenic	16	22245741	22265929	20189	2	20462	uc007ysd.1	-7177	ENSMUSG00000022858	Tra2b	transformer 2 beta	NA	NA	NA
chr5	31124397	31140527	16131	*	9.38	9.06	9.64	-0.58	2.34e-08	3.07e-07	548.01	517.94	734	861.15	Promoter (<=1kb)	5	31137989	31138895	907	2	22226	uc008wxe.1	0	ENSMUSG00000038676	Ucn	urocortin	uc056zzb.1;uc057btv.1;uc008wxf.3;uc056zzc.1;uc057btw.1;uc008wxe.1;uc008wxd.2	17527;17527;17527;17527;17527;22226;58522	13653;13653;13763;13763;13763;0;0
chr5	112224934	112231676	6743	*	8.38	7.97	8.71	-0.74	2.36e-08	3.1e-07	249.34	251.12	396	438.84	Promoter (<=1kb)	5	112213228	112228948	15721	2	330166	uc008ysk.2	0	ENSMUSG00000097767	Miat	myocardial infarction associated transcript (non-protein coding)	uc008ysk.2;uc008ysl.2;uc008ysm.2;uc008ysn.2;uc012ebf.1;uc008yso.2;uc008ysp.2;uc008ysq.2;uc008ysr.2;uc008yss.2	330166;330166;330166;330166;330166;330166;330166;330166;330166;330166	0;0;0;0;0;0;0;0;0;0
chr17	36157049	36171304	14256	*	8.27	7.81	8.62	-0.81	2.38e-08	3.12e-07	226.01	222.68	351	435.93	Promoter (<=1kb)	17	36164444	36168537	4094	2	667977	uc012asn.2	0	ENSMUSG00000073402	Gm8909	predicted gene 8909	uc012asn.2;uc012asm.1	667977;675325	0;0
chr7	123974039	124001043	27005	*	9.74	9.46	9.97	-0.5	2.39e-08	3.13e-07	729.35	680.78	955	1044.08	Promoter (<=1kb)	7	123983181	124398989	415809	1	628779	uc029woh.1	0	ENSMUSG00000078591	Hs3st4	heparan sulfate (glucosamine) 3-O-sulfotransferase 4	uc029woh.1	628779	0
chr10	80295510	80315647	20138	*	9.37	9.07	9.63	-0.56	2.43e-08	3.18e-07	556.01	517.94	752	828.06	Promoter (<=1kb)	10	80301201	80302494	1294	1	23805	uc056yho.1	0	ENSMUSG00000020135	Apc2	adenomatosis polyposis coli 2	uc007gcn.2;uc057awz.1;uc056yho.1;uc007gcp.1;uc007gcq.1	20054;20054;23805;23805;66374	3079;3001;0;0;4901
chr3	26309955	26345309	35355	*	10.18	9.94	10.38	-0.45	2.45e-08	3.2e-07	1005.36	957.41	1278	1394.38	Promoter (<=1kb)	3	25431841	26331909	900069	2	192167	uc008otc.1	0	ENSMUSG00000063887	Nlgn1	neuroligin 1	uc008otc.1;uc008otd.1	192167;192167	0;0
chr16	17910858	17921128	10271	*	8.88	8.54	9.16	-0.62	2.45e-08	3.2e-07	368.01	378.65	567	577.02	Promoter (<=1kb)	16	17913554	17915059	1506	2	195333	uc012aby.1	0	ENSMUSG00000022738	Gsc2	goosecoid homebox 2	uc007ymp.2;uc012aby.1;uc007ymm.1;uc007ymn.1	13358;195333;27886;27886	7091;0;0;0
chr16	23979204	23991131	11928	*	8.75	8.39	9.04	-0.65	2.52e-08	3.29e-07	340.67	329.6	514	536.15	Promoter (<=1kb)	16	23965052	23988612	23561	2	12053	uc007ytz.1	0	ENSMUSG00000022508	Bcl6	B cell leukemia/lymphoma 6	uc007ytz.1	12053	0
chr12	111478122	111496275	18154	*	9.44	9.15	9.69	-0.54	2.55e-08	3.32e-07	540.68	594.46	792	859.2	Promoter (<=1kb)	12	111484609	111485823	1215	2	212539	uc007pdc.2	0	ENSMUSG00000010529	Gm266	predicted gene 266	uc007pdc.2	212539	0
chr11	58196453	58219372	22920	*	9.27	8.96	9.52	-0.56	2.58e-08	3.36e-07	510.68	485.57	709	759.95	Promoter (<=1kb)	11	58199556	58207575	8020	1	16145	uc007jaq.1	0	ENSMUSG00000078853	Igtp	interferon gamma induced GTPase	uc007jaq.1;uc007jar.1;uc007jas.2;uc007jat.2;uc007jau.2;uc007jav.2	16145;16145;16145;54396;54396;54396	0;0;0;0;0;0
chr11	118566587	118578952	12366	*	8.97	8.62	9.24	-0.62	2.62e-08	3.39e-07	404.68	383.55	575	637.35	Intron (uc033gbu.1/52897, intron 3 of 13)	11	118489760	118761041	271282	2	52897	uc033gbu.1	182089	ENSMUSG00000025576	Rbfox3	RNA binding protein, fox-1 homolog (C. elegans) 3	uc033gbu.1;uc007mpl.1;uc007mpm.1;uc007mpn.1;uc007mpo.1;uc007mpp.1	52897;52897;52897;52897;52897;52897	0;0;0;0;0;0
chr11	74519052	74535523	16472	*	9.37	9.08	9.61	-0.54	2.62e-08	3.39e-07	525.35	555.22	762	805.68	Intron (uc007kbx.1/380711, intron 2 of 24)	11	74383483	74590158	206676	2	380711	uc007kbx.1	54635	ENSMUSG00000038807	Rap1gap2	RAP1 GTPase activating protein 2	uc007kbx.1;uc007kby.1	380711;380711	0;0
chr6	119535459	119553878	18420	*	9.37	9.06	9.62	-0.56	2.64e-08	3.42e-07	564.68	503.23	766	808.6	Promoter (<=1kb)	6	119432531	119544347	111817	2	22419	uc009dmi.2	0	ENSMUSG00000030170	Wnt5b	wingless-type MMTV integration site family, member 5B	uc009dmi.2	22419	0
chr11	83407511	83450254	42744	*	10.39	10.17	10.58	-0.41	2.67e-08	3.45e-07	1119.36	1180.09	1481	1576.34	Promoter (<=1kb)	11	83421635	83429521	7887	2	237891	uc007koy.2	0	ENSMUSG00000020686	Gas2l2	growth arrest-specific 2 like 2	uc007kpa.2;uc007kpb.2;uc007kpc.2;uc007kpd.2;uc007koy.2;uc007kov.1;uc007kow.3;uc007kox.1;uc007koz.2;uc007kot.2;uc007kou.2	118453;118453;118453;118453;237891;276952;276952;276952;66330;71770;71770	0;0;0;0;0;0;0;0;0;104814;104814
chr12	112672685	112681884	9200	*	8.61	8.21	8.92	-0.71	2.68e-08	3.47e-07	279.34	310.96	446	521.55	Promoter (<=1kb)	12	112653821	112674276	20456	2	11651	uc007pex.2	0	ENSMUSG00000001729	Akt1	thymoma viral proto-oncogene 1	uc007pex.2;uc007pey.2;uc007pez.2;uc007pfa.2	11651;11651;382639;382639	0;0;0;0
chr18	47357106	47383534	26429	*	9.82	9.55	10.05	-0.5	2.69e-08	3.47e-07	742.68	754.35	988	1125.82	Promoter (<=1kb)	18	47245254	47368870	123617	2	20358	uc008ewa.2	0	ENSMUSG00000019647	Sema6a	sema domain, transmembrane domain (TM), and cytoplasmic domain, (semaphorin) 6A	uc008ewa.2;uc008ewb.2;uc008ewc.2;uc008ewd.2	20358;20358;20358;20358	0;0;0;0
chr15	102352393	102382643	30251	*	10.04	9.79	10.25	-0.46	2.71e-08	3.5e-07	877.35	894.63	1153	1288.32	Promoter (<=1kb)	15	102357177	102366271	9095	2	170574	uc007xvm.1	0	ENSMUSG00000060284	Sp7	Sp7 transcription factor 7	uc007xvm.1;uc007xvn.1;uc007xvl.2	170574;170574;223921	0;0;-1634
chr11	88188138	88203611	15474	*	9.38	9.09	9.62	-0.53	2.73e-08	3.51e-07	536.68	553.26	773	799.85	Promoter (<=1kb)	11	88194106	88211507	17402	1	64656	uc056yny.1	0	ENSMUSG00000023723	Mrps23	mitochondrial ribosomal protein S23	uc007kvg.2;uc007kvh.2;uc011ycf.1;uc011ycg.1;uc056yny.1;uc007kvi.2;uc007kvj.2;uc029rnh.3;uc056ynz.1;uc056yoa.1	103841;103841;103841;103841;64656;64656;64656;64656;64656;64656	0;0;0;0;0;-777;-777;-777;-777;-777
chr7	47112504	47136751	24248	*	9.66	9.4	9.89	-0.49	2.87e-08	3.7e-07	681.35	667.05	918	979.86	Promoter (<=1kb)	7	47077798	47132598	54801	2	19259	uc009gzz.3	0	ENSMUSG00000030854	Ptpn5	protein tyrosine phosphatase, non-receptor type 5	uc009gzz.3;uc009haa.3;uc009hab.3;uc009hac.1	19259;19259;19259;19259	0;0;0;0
chr17	87794936	87800050	5115	*	7.31	6.69	7.74	-1.05	2.94e-08	3.78e-07	104	103	208	220.88	Promoter (<=1kb)	17	87745821	87797994	52174	2	210741	uc008dvc.1	0	ENSMUSG00000050138	Kcnk12	potassium channel, subfamily K, member 12	uc008dvc.1	210741	0
chr4	108027269	108034651	7383	*	8.5	8.1	8.82	-0.72	3.04e-08	3.9e-07	263.34	285.46	422	479.71	Promoter (<=1kb)	4	108014793	108030986	16194	2	242608	uc033idk.1	0	ENSMUSG00000028600	Podn	podocan	uc033idk.1;uc008uaq.1;uc008uar.1	242608;242608;242608	0;0;0
chr17	15533814	15542751	8938	*	8.64	8.27	8.94	-0.67	3.1e-08	3.98e-07	314.67	303.12	476	505.99	Downstream (<1kb)	17	15521575	15527301	5727	2	18567	uc008aoq.1	-6513	ENSMUSG00000014771	Pdcd2	programmed cell death 2	uc012aku.1;uc033hax.1;uc033hay.1;uc033haz.1;uc029tan.1	213389;213389;213389;213389;213389	0;0;0;0;0
chr5	101760365	101770144	9780	*	8.74	8.36	9.03	-0.67	3.16e-08	4.05e-07	350.01	307.04	506	541.99	Promoter (<=1kb)	5	101765130	101823852	58723	1	74596	uc008yio.1	0	ENSMUSG00000029330	Cds1	CDP-diacylglycerol synthase 1	uc008yio.1	74596	0
chr4	97738944	97761282	22339	*	9.81	9.54	10.04	-0.49	3.19e-08	4.08e-07	780.02	712.17	1008	1093.71	Exon (uc008ttr.1/uc008ttr.1, exon 1 of 2)	4	97581943	98118876	536934	1	18027	uc008tty.2	157001	ENSMUSG00000028565	Nfia	nuclear factor I/A	uc008tty.2;uc008ttp.1	18027;319865	0;0
chr7	42568751	42590494	21744	*	9.31	9.56	9.02	0.54	3.21e-08	4.11e-07	742.68	766.13	523	513.77	Distal Intergenic	7	42609526	42642604	33079	2	208111	uc009gmd.2	52110	ENSMUSG00000074158	Zfp976	zinc finger protein 976	NA	NA	NA
chr1	124039093	124054606	15514	*	9.09	8.77	9.35	-0.58	3.23e-08	4.12e-07	432.68	439.47	676	628.59	Promoter (<=1kb)	1	123332138	124045559	713422	2	269109	uc007cjx.2	0	ENSMUSG00000036815	Dpp10	dipeptidylpeptidase 10	uc007cjx.2	269109	0
chr13	15994844	16025543	30700	*	9.86	9.6	10.07	-0.47	3.24e-08	4.14e-07	768.02	787.71	1035	1116.09	Promoter (<=1kb)	13	15813548	16023423	209876	2	100503142	uc007pnu.1	0	NA	B230303A05Rik	U1 small nuclear ribonucleoprotein 1C pseudogene	uc007pnu.1;uc007pnv.1;uc057kpo.1;uc007pnw.1	100503142;100503142;16323;16323	0;0;0;0
chr1	39190128	39202097	11970	*	9.1	8.77	9.37	-0.6	3.27e-08	4.16e-07	446.68	426.72	621	701.57	Promoter (<=1kb)	1	39194272	39363240	168969	1	18143	uc007atd.2	0	ENSMUSG00000026077	Npas2	neuronal PAS domain protein 2	uc033fiv.1;uc007atd.2	102466631;18143	-3136;0
chr4	66387594	66416959	29366	*	9.81	9.56	10.03	-0.48	3.28e-08	4.17e-07	724.02	781.82	1018	1075.22	Promoter (<=1kb)	4	65380803	66404483	1023681	2	56079	uc008thn.1	0	ENSMUSG00000028373	Astn2	astrotactin 2	uc008thn.1;uc008tho.1;uc008thp.1;uc008ths.1;uc008tht.1;uc008thu.1	56079;56079;56079;56079;56079;56079	0;0;0;0;0;0
chr3	107019374	107084436	65063	*	10.97	10.79	11.13	-0.34	3.28e-08	4.17e-07	1795.37	1750.02	2207	2280.83	Promoter (<=1kb)	3	107036162	107038129	1968	1	16491	uc008qwp.2	0	ENSMUSG00000047959	Kcna3	potassium voltage-gated channel, shaker-related subfamily, member 3	uc008qwp.2;uc008qwq.2	16491;229694	0;0
chr14	55111418	55123393	11976	*	8.68	8.28	9	-0.71	3.33e-08	4.22e-07	326.01	297.23	463	557.56	Promoter (<=1kb)	14	55106826	55115552	8727	2	319984	uc007tyg.1	0	ENSMUSG00000022208	Jph4	junctophilin 4	uc007tye.3;uc007tyf.3;uc007tyg.1;uc007tyh.2;uc007tyj.2	11766;11766;319984;319984;319984	-4825;-4825;0;0;0
chr9	4245994	4265008	19015	*	8.81	9.09	8.46	0.63	3.37e-08	4.27e-07	563.35	528.73	354	350.3	Distal Intergenic	9	4294793	4309494	14702	2	67618	uc009obe.2	44486	ENSMUSG00000025894	Aasdhppt	aminoadipate-semialdehyde dehydrogenase-phosphopantetheinyl transferase	NA	NA	NA
chr3	58993344	59033179	39836	*	10.21	9.99	10.4	-0.42	3.37e-08	4.27e-07	1027.36	1001.56	1340	1367.13	Promoter (<=1kb)	3	59005825	59094888	89064	1	329650	uc008pig.1	0	ENSMUSG00000056476	Med12l	mediator complex subunit 12-like	uc008pig.1;uc008pih.1;uc008pii.3	329650;329650;329650	0;0;0
chr11	3989035	4006112	17078	*	9.17	8.85	9.43	-0.58	3.47e-08	4.39e-07	474.01	447.32	655	722.98	Promoter (<=1kb)	11	3989933	3999328	9396	1	53897	uc007hud.2	0	ENSMUSG00000049721	Gal3st1	galactose-3-O-sulfotransferase 1	uc007hub.2;uc007huc.2;uc007hud.2	53897;53897;53897	0;0;0
chr6	112478755	112495545	16791	*	9.13	8.82	9.39	-0.57	3.54e-08	4.46e-07	440.01	463.99	661	677.24	Promoter (<=1kb)	6	112473684	112488394	14711	2	18430	uc057lrc.1	0	ENSMUSG00000049112	Oxtr	oxytocin receptor	uc057lrc.1;uc009deb.2;uc057lrd.1	18430;18430;18430	0;0;0
chr16	95576490	95591296	14807	*	8.99	8.66	9.26	-0.6	3.54e-08	4.47e-07	417.34	394.34	614	612.05	Promoter (<=1kb)	16	95359169	95586593	227425	2	13876	uc008acd.2	0	ENSMUSG00000040732	Erg	ETS transcription factor	uc008acd.2	13876	0
chr11	100847264	100853563	6300	*	8.19	7.75	8.54	-0.79	3.61e-08	4.55e-07	226.01	203.06	352	390.19	Promoter (<=1kb)	11	100780731	100850585	69855	2	20851	uc007lmj.2	0	ENSMUSG00000020919	Stat5b	signal transducer and activator of transcription 5B	uc007lmj.2	20851	0
chr11	32269286	32288935	19650	*	9.21	8.9	9.46	-0.56	3.62e-08	4.56e-07	469.34	488.52	679	732.71	Promoter (<=1kb)	11	32283672	32284486	815	1	15122	uc007ijk.2	0	ENSMUSG00000069919	Hba-a1	hemoglobin alpha, adult chain 1	uc007ijk.2;uc007ijj.3;uc007ijc.2;uc007ijf.2;uc007ijg.2;uc007ijh.2;uc007iji.2;uc033fuh.1;uc007ijl.1	15122;15126;17168;17168;17168;17168;17168;17168;544763	0;0;-1579;-1579;-1579;-1579;-1579;-1579;0
chr15	67169559	67181583	12025	*	9.11	8.79	9.37	-0.58	3.63e-08	4.56e-07	444.68	439.47	630	693.78	Promoter (<=1kb)	15	67102875	67176882	74008	2	20442	uc007wba.1	0	ENSMUSG00000013846	St3gal1	ST3 beta-galactoside alpha-2,3-sialyltransferase 1	uc007wba.1;uc007wbb.1	20442;20442	0;0
chr3	94215165	94257042	41878	*	10.23	10.43	9.99	0.44	3.63e-08	4.56e-07	1439.37	1317.42	1054	977.91	Distal Intergenic	3	94174412	94178193	3782	2	100043188	uc008qfr.1	-36972	ENSMUSG00000074424	Gm10696	predicted gene 10696	NA	NA	NA
chr18	36187299	36220477	33179	*	9.95	9.72	10.16	-0.44	3.67e-08	4.6e-07	830.02	851.47	1131	1154.04	Promoter (<=1kb)	18	36017649	36197160	179512	2	100042150	uc012bbl.2	0	ENSMUSG00000060275	Nrg2	neuregulin 2	uc012bbl.2	100042150	0
chr6	141238611	141264823	26213	*	9.59	9.31	9.81	-0.5	3.67e-08	4.6e-07	623.35	649.39	869	932.18	Promoter (<=1kb)	6	141249269	141471596	222328	1	54611	uc009eon.1	0	ENSMUSG00000041741	Pde3a	phosphodiesterase 3A, cGMP inhibited	uc009eon.1;uc009eoo.1;uc012eve.1	54611;54611;54611	0;0;0
chr14	70874553	70911573	37021	*	10.36	10.12	10.56	-0.45	3.8e-08	4.75e-07	1164.69	1054.53	1432	1597.75	Promoter (<=1kb)	14	70890107	70979840	89734	1	14586	uc007uoz.2	0	ENSMUSG00000022103	Gfra2	glial cell line derived neurotrophic factor family receptor alpha 2	uc007uoz.2;uc007upa.2;uc007upb.2;uc029sls.1	14586;14586;14586;73648	0;0;0;0
chr2	158659291	158675599	16309	*	9.1	8.79	9.36	-0.57	3.82e-08	4.78e-07	440.01	444.37	675	639.29	Promoter (<=1kb)	2	158666630	158766334	99705	1	228852	uc012cil.1	0	ENSMUSG00000037754	Ppp1r16b	protein phosphatase 1, regulatory subunit 16B	uc012cil.1;uc008nqo.2;uc008nqp.2	228852;228852;228852	0;0;0
chr7	19301500	19345822	44323	*	10.25	10.03	10.45	-0.42	3.85e-08	4.81e-07	1001.36	1087.88	1382	1412.87	Promoter (<=1kb)	7	19345071	19354831	9761	1	13870	uc009fll.3	0	ENSMUSG00000003549	Ercc1	excision repair cross-complementing rodent repair deficiency, complementation group 1	uc009fll.3;uc009flm.2;uc009flk.1;uc012fbb.3	13870;13870;14282;14282	0;0;0;0
chr8	99867063	100109743	242681	*	12.83	12.73	12.93	-0.2	3.92e-08	4.89e-07	6870.82	6731.32	7588	8001.38	Distal Intergenic	8	99416674	99733438	316765	1	234624	uc009mzs.2	450389	ENSMUSG00000052479	A330008L17Rik	RIKEN cDNA A330008L17 gene	NA	NA	NA
chr12	56592876	56626178	33303	*	10.14	9.91	10.34	-0.43	3.99e-08	4.97e-07	990.69	927.98	1324	1268.86	Promoter (<=1kb)	12	56611393	56613284	1892	2	18094	uc007nph.2	0	ENSMUSG00000058669	Nkx2-9	NK2 homeobox 9	uc007nph.2;uc029rsn.1;uc029rso.1	18094;97836;97836	0;0;0
chr11	97125918	97154941	29024	*	9.84	9.58	10.05	-0.47	4.02e-08	5e-07	779.35	756.32	1024	1100.52	Promoter (<=1kb)	11	97146364	97146419	56	2	102466822	uc033fzp.1	0	ENSMUSG00000099286	Mir7235	microRNA 7235	uc033fzp.1;uc007ldu.1;uc011yds.1;uc011ydr.1	102466822;16211;16211;73174	0;32951;32951;0
chr11	93093353	93108444	15092	*	9.32	9.02	9.56	-0.55	4.09e-08	5.09e-07	526.01	509.12	721	793.03	Promoter (<=1kb)	11	93098410	93491923	393514	1	72605	uc007kxg.1	0	ENSMUSG00000056158	Car10	carbonic anhydrase 10	uc007kxg.1;uc007kxh.2;uc007kxi.2;uc007kxj.2	72605;72605;72605;72605	0;0;0;0
chr2	64083372	64108490	25119	*	9.55	9.27	9.77	-0.5	4.1e-08	5.09e-07	610.68	627.81	853	898.12	Promoter (<=1kb)	2	63971508	64098038	126531	2	60344	uc008jvv.3	0	ENSMUSG00000075324	Fign	fidgetin	uc008jvv.3;uc008jvw.3;uc012bvz.2	60344;60344;60344	0;0;0
chr9	45427001	45433356	6356	*	8.17	7.73	8.51	-0.79	4.13e-08	5.13e-07	222.01	202.08	349	382.41	Promoter (<=1kb)	9	45430293	45753713	323421	1	114873	uc009pfz.1	0	ENSMUSG00000032087	Dscaml1	DS cell adhesion molecule like 1	uc009pfx.1;uc009pfy.1;uc009pfz.1;uc009pfw.1	114873;114873;114873;74602	0;0;0;0
chr15	37198442	37239483	41042	*	10.31	10.1	10.5	-0.4	4.16e-08	5.16e-07	1086.69	1103.57	1457	1432.33	Promoter (<=1kb)	15	37233036	37363569	130534	1	252973	uc007vne.3	0	ENSMUSG00000022286	Grhl2	grainyhead like transcription factor 2	uc007vne.3	252973	0
chr19	6916537	6937931	21395	*	9.52	9.23	9.76	-0.53	4.17e-08	5.16e-07	582.68	616.04	812	917.58	Promoter (<=1kb)	19	6925690	6934515	8826	2	16528	uc008gjj.1	0	ENSMUSG00000024957	Kcnk4	potassium channel, subfamily K, member 4	uc033his.1;uc008gjk.2;uc012bhq.1;uc008gjl.1;uc008gjm.1;uc008gjn.2;uc008gjo.2;uc008gjj.1;uc008gjg.1;uc008gjh.1;uc012bhp.1;uc057lae.1;uc008gji.1	102466213;107173;107173;107173;107173;12015;12015;16528;26379;26379;67077;67077;67077	-2251;3262;3262;3576;4519;-3930;-4631;0;0;0;0;0;0
chr4	61911923	61929505	17583	*	8.59	8.9	8.21	0.69	4.29e-08	5.3e-07	500.68	454.18	312	279.26	Distal Intergenic	4	61831319	61835180	3862	2	17844	uc008tbq.1	-76743	ENSMUSG00000058523	Mup5	major urinary protein 5	NA	NA	NA
chr9	37546399	37560011	13613	*	8.95	8.62	9.21	-0.59	4.31e-08	5.33e-07	389.34	399.25	595	593.56	Promoter (<=1kb)	9	37544493	37552745	8253	2	64011	uc009ovc.1	0	ENSMUSG00000053310	Nrgn	neurogranin	uc009ovb.1;uc012gra.1;uc012grb.1;uc009ovc.1	57276;57276;57276;64011	7144;7144;7144;0
chr19	54043058	54054334	11277	*	9.03	8.67	9.32	-0.65	4.4e-08	5.42e-07	407.34	408.08	569	712.27	Promoter (<=1kb)	19	54045182	54048982	3801	1	11551	uc012bnl.1	0	ENSMUSG00000033717	Adra2a	adrenergic receptor, alpha 2a	uc012bnl.1	11551	0
chr6	121457450	121494495	37046	*	10.08	9.84	10.28	-0.44	4.44e-08	5.47e-07	954.02	881.88	1249	1241.61	Promoter (<=1kb)	6	121372927	121473678	100752	2	243621	uc009dom.3	0	ENSMUSG00000040797	Iqsec3	IQ motif and Sec7 domain 3	uc009dom.3;uc009don.3;uc009doo.3;uc009dop.1	243621;243621;243621;243621	0;0;0;0
chr16	97760915	97768788	7874	*	8.69	8.31	8.98	-0.67	4.64e-08	5.71e-07	329.34	307.04	477	535.18	Promoter (<=1kb)	16	97741942	97763755	21814	2	72388	uc008adn.1	0	ENSMUSG00000005251	Ripk4	receptor-interacting serine-threonine kinase 4	uc008adn.1	72388	0
chr6	117166520	117186236	19717	*	9.6	9.33	9.82	-0.49	4.67e-08	5.73e-07	650.68	633.7	878	931.21	Promoter (<=1kb)	6	117168535	117175069	6535	1	20315	uc009dks.2	0	ENSMUSG00000061353	Cxcl12	chemokine (C-X-C motif) ligand 12	uc009dks.2;uc009dkt.2;uc009dku.2	20315;20315;20315	0;0;0
chr4	91368192	91407391	39200	*	10.24	10.02	10.43	-0.41	4.69e-08	5.76e-07	1056.02	1018.23	1372	1383.68	Promoter (<=1kb)	4	91373284	91373363	80	2	102466157	uc033idf.1	0	ENSMUSG00000098563	Mir6402	microRNA 6402	uc033idf.1;uc008ton.3;uc008too.3;uc008top.4;uc008toq.3;uc008tor.2	102466157;15569;15569;15569;15569;15569	0;0;0;0;0;0
chr19	7156459	7168761	12303	*	8.82	8.47	9.11	-0.64	4.74e-08	5.81e-07	331.34	377.67	531	572.15	Intron (uc008gkg.2/107227, intron 3 of 10)	19	7056768	7198062	141295	1	107227	uc008gkg.2	99691	ENSMUSG00000036278	Macrod1	MACRO domain containing 1	uc008gkg.2	107227	0
chr9	64082299	64085822	3524	*	7.67	7.12	8.06	-0.94	4.84e-08	5.92e-07	149.34	129.49	254	280.24	Promoter (1-2kb)	9	64080761	64088045	7285	1	76814	uc029xbu.1	1538	NA	Scarletltr	Scarletltr, erythroid developmental long intergenic non-protein coding transcript	uc029xbu.1	76814	0
chr11	101952895	101970240	17346	*	9.2	8.9	9.46	-0.56	4.84e-08	5.92e-07	484.68	467.92	672	733.68	Promoter (<=1kb)	11	101962458	101967015	4558	2	74499	uc011yfn.1	0	ENSMUSG00000001494	Sost	sclerostin	uc007lqa.3;uc007lpy.2;uc011yfn.1	72349;73887;74499	14551;0;0
chr3	107453977	107469943	15967	*	9.06	8.72	9.33	-0.61	4.89e-08	5.97e-07	435.34	410.04	600	686	Promoter (<=1kb)	3	107438303	107458898	20596	2	99738	uc008qxa.1	0	ENSMUSG00000027895	Kcnc4	potassium voltage gated channel, Shaw-related subfamily, member 4	uc012cvw.2;uc008qxb.1;uc008qxc.1;uc008qxa.1	229706;229706;229706;99738	0;0;0;0
chr9	85323413	85329970	6558	*	8.31	7.87	8.65	-0.78	5e-08	6.1e-07	250.67	216.79	372	429.11	Promoter (<=1kb)	9	85320439	85327124	6686	2	212943	uc012gxn.1	0	ENSMUSG00000032265	Tent5a	terminal nucleotidyltransferase 5A	uc012gxn.1;uc009qwt.2	212943;212943	0;0
chr5	141226223	141258713	32491	*	9.96	9.71	10.16	-0.45	5.04e-08	6.14e-07	867.35	809.29	1122	1173.5	Promoter (<=1kb)	5	141241534	142213791	972258	1	330222	uc009ail.2	0	ENSMUSG00000039683	Sdk1	sidekick cell adhesion molecule 1	uc009ail.2	330222	0
chr7	81432188	81461743	29556	*	10.08	9.84	10.28	-0.44	5.07e-08	6.18e-07	888.69	950.55	1204	1289.29	Promoter (<=1kb)	7	81347026	81454758	107733	2	12877	uc009ibw.2	0	ENSMUSG00000025586	Cpeb1	cytoplasmic polyadenylation element binding protein 1	uc009ibx.1;uc009iby.1;uc009ibw.2;uc012fnu.2;uc012fnv.2	11775;11775;12877;12877;12877	0;0;0;0;0
chr7	101811355	101821731	10377	*	9.03	8.71	9.29	-0.58	5.19e-08	6.32e-07	416.01	422.79	639	612.05	Promoter (<=1kb)	7	101818313	101822726	4414	1	11859	uc009ipe.2	0	ENSMUSG00000007946	Phox2a	paired-like homeobox 2a	uc009ipe.2;uc009ipf.2;uc009ipg.2;uc009iph.2;uc009ipi.1	11859;16332;16332;16332;16332	0;7561;16093;16495;16053
chr5	135074609	135113904	39296	*	10.27	10.03	10.47	-0.43	5.3e-08	6.44e-07	1042.69	1055.51	1333	1497.52	Promoter (<=1kb)	5	135072900	135078266	5367	2	194309	uc008zxq.2	0	ENSMUSG00000043614	Vps37d	vacuolar protein sorting 37D	uc008zxq.2;uc008zxr.2;uc008zxs.2;uc008zxt.2;uc012eek.2;uc012eel.2	194309;194309;58805;58805;58805;58805	0;0;0;0;0;0
chr19	27202920	27227482	24563	*	9.71	9.45	9.93	-0.49	5.32e-08	6.46e-07	715.35	681.76	938	1019.75	Promoter (<=1kb)	19	27217020	27254231	37212	1	22359	uc008hbt.2	0	ENSMUSG00000024924	Vldlr	very low density lipoprotein receptor	uc008hbt.2;uc008hbu.2;uc057lao.1	22359;22359;22359	0;0;0
chr8	22960207	22988186	27980	*	9.73	9.45	9.96	-0.51	5.49e-08	6.66e-07	691.35	707.27	918	1080.08	Promoter (<=1kb)	8	22974836	23150497	175662	1	11733	uc009lee.3	0	ENSMUSG00000031543	Ank1	ankyrin 1, erythroid	uc009lee.3;uc009lef.3	11733;11733	0;0
chr13	34641746	34663719	21974	*	9.66	9.39	9.89	-0.5	5.53e-08	6.69e-07	694.68	645.47	903	998.35	Promoter (<=1kb)	13	34652923	34666774	13852	1	101056149	uc007qbk.1	0	ENSMUSG00000086786	Gm15908	predicted gene 15908	uc007qbk.1;uc007qbi.1;uc007qbj.1;uc011yyh.1	101056149;66895;66895;66895	0;0;0;0
chr3	5201564	5236716	35153	*	10.15	9.92	10.36	-0.44	5.55e-08	6.71e-07	1002.02	930.93	1259	1365.19	Promoter (<=1kb)	3	5177824	5220823	43000	2	72608	uc008onz.2	0	NA	2700069I18Rik	RIKEN cDNA 2700069I18 gene	uc008onz.2;uc008ooa.1	72608;80892	0;0
chr9	20719392	20746045	26654	*	9.8	9.55	10.01	-0.46	5.56e-08	6.71e-07	746.02	753.37	1031	1024.62	Promoter (<=1kb)	9	20667986	20728214	60229	2	244723	uc009oje.1	0	ENSMUSG00000032172	Olfm2	olfactomedin 2	uc009oje.1	244723	0
chr5	57698606	57758920	60315	*	11.21	10.9	11.47	-0.57	5.6e-08	6.75e-07	1986.71	1834.39	2649	3012.56	Promoter (<=1kb)	5	57570084	57717919	147836	2	319216	uc008xls.1	0	ENSMUSG00000097216	4932441J04Rik	RIKEN cDNA 4932441J04 gene	uc008xls.1;uc008xlt.3;uc008xlu.3;uc008xlv.3;uc057bug.1	319216;54216;54216;54216;54216	0;0;0;0;0
chr6	28253999	28275884	21886	*	9.72	9.45	9.95	-0.5	5.68e-08	6.84e-07	710.02	691.57	928	1047.97	Promoter (<=1kb)	6	28239931	28261601	21671	2	627049	uc009bcm.1	0	ENSMUSG00000039841	Zfp800	zinc finger protein 800	uc009bcm.1;uc029vtu.1;uc009bcn.1	627049;627049;627049	0;0;0
chr2	25378843	25404847	26005	*	9.7	9.44	9.93	-0.49	5.69e-08	6.85e-07	700.68	688.63	1021	926.34	Promoter (<=1kb)	2	25395874	25401323	5450	1	12496	uc008irw.2	0	ENSMUSG00000015085	Entpd2	ectonucleoside triphosphate diphosphohydrolase 2	uc008irw.2;uc008irx.2;uc008iry.1;uc008irt.2;uc008iru.2;uc008irv.2	12496;18146;18146;72080;72080;72080	0;0;-2179;6808;6808;6808
chr9	16491972	16512016	20045	*	9.58	9.31	9.81	-0.51	5.78e-08	6.96e-07	622.68	644.49	851	948.72	Distal Intergenic	9	15910193	16378231	468039	2	270120	uc009ogj.1	-113741	ENSMUSG00000074505	Fat3	FAT atypical cadherin 3	NA	NA	NA
chr6	91838495	91845864	7370	*	8.42	8.01	8.73	-0.72	5.81e-08	6.99e-07	260.67	255.05	396	454.41	Distal Intergenic	6	91761509	91807393	45885	2	243547	uc012epd.3	-31102	ENSMUSG00000030098	Grip2	glutamate receptor interacting protein 2	NA	NA	NA
chr13	7167110	7177181	10072	*	8.02	8.38	7.53	0.85	5.85e-08	7.03e-07	364.68	303.12	197	173.2	Distal Intergenic	13	6619061	6648771	29711	2	56421	uc007pkd.2	-518339	ENSMUSG00000021196	Pfkp	phosphofructokinase, platelet	NA	NA	NA
chr10	82220553	82236314	15762	*	8.87	9.15	8.52	0.64	5.98e-08	7.17e-07	600.01	539.53	390	342.51	5' UTR	10	82224856	82241275	16420	2	237411	uc007gjl.3	4961	ENSMUSG00000062931	Zfp938	zinc finger protein 938	uc007gjl.3;uc007gjm.3	237411;237411	0;0
chr3	53036397	53052036	15640	*	9.17	8.87	9.42	-0.55	6.01e-08	7.19e-07	465.34	467.92	662	708.38	Promoter (<=1kb)	3	53041547	53261679	220133	1	108927	uc008pep.1	0	ENSMUSG00000048332	Lhfp	lipoma HMGIC fusion partner	uc008pep.1;uc008peq.1	108927;108927	0;0
chr8	70040480	70133949	93470	*	11.83	11.69	11.96	-0.27	6.04e-08	7.22e-07	3221.41	3377.43	3870	4079.99	Promoter (<=1kb)	8	70102524	70102586	63	2	102465646	uc033jfx.1	0	ENSMUSG00000099042	Mir7066	microRNA 7066	uc033jfx.1;uc009lyp.2;uc009lyq.2;uc009lys.2;uc009lyt.1;uc009lyu.1;uc009lyr.1;uc009lym.1;uc009lyn.1;uc009lyo.1;uc009lyj.2;uc009lyk.2;uc012geq.1;uc012ger.1;uc009lyl.1;uc009lyv.3;uc009lyw.3;uc033jfy.2	102465646;107770;107770;13004;19727;19727;330790;70616;70616;70616;74549;74549;74549;74549;74549;75692;75692;75692	0;0;0;0;0;0;0;0;0;0;0;0;0;0;0;0;0;0
chr4	33913184	33937641	24458	*	9.78	9.53	10	-0.47	6.08e-08	7.26e-07	754.02	725.91	994	1049.92	Promoter (<=1kb)	4	33924632	33948831	24200	1	12801	uc008sfw.1	0	ENSMUSG00000044288	Cnr1	cannabinoid receptor 1 (brain)	uc008sfw.1;uc012dbm.1	12801;12801	0;0
chr9	95381967	95413641	31675	*	10.09	9.86	10.29	-0.42	6.1e-08	7.28e-07	950.02	909.35	1236	1260.1	Promoter (<=1kb)	9	95400926	95407270	6345	2	54371	uc009raz.2	0	ENSMUSG00000033350	Chst2	carbohydrate sulfotransferase 2	uc009raz.2	54371	0
chr12	18360806	18379726	18921	*	9.07	9.33	8.76	0.57	6.19e-08	7.38e-07	648.01	636.64	441	425.22	Distal Intergenic	12	18514510	18535254	20745	1	236366	uc007ndb.2	-134784	ENSMUSG00000073197	5730507C01Rik	RIKEN cDNA 5730507C01 gene	NA	NA	NA
chr3	8244539	8246710	2172	*	10.89	11.04	10.71	0.34	6.2e-08	7.38e-07	2116.72	2107.09	1670	1675.59	Distal Intergenic	3	8461387	8463098	1712	2	620966	uc012cnd.1	216388	NA	Gm6194	transmembrane protein 189 pseudogene	NA	NA	NA
chr10	43999385	44013772	14388	*	9.21	8.9	9.47	-0.57	6.23e-08	7.42e-07	467.34	486.55	660	756.06	Promoter (<=1kb)	10	43950307	44004846	54540	2	11630	uc007ezq.2	0	ENSMUSG00000019866	Crybg1	crystallin beta-gamma domain containing 1	uc007ezq.2	11630	0
chr11	77449041	77472339	23299	*	9.7	9.44	9.92	-0.48	6.26e-08	7.44e-07	714.68	675.88	947	989.59	Promoter (<=1kb)	11	77462384	77468370	5987	1	216961	uc007kgq.1	0	ENSMUSG00000020836	Coro6	coronin 6	uc007kgq.1;uc011xzu.1;uc011xzv.1;uc007kgr.1;uc007kgs.1;uc007kgt.1;uc007kgl.3;uc007kgo.3;uc007kgu.1;uc007kgv.1;uc007kgw.1;uc007kgx.1;uc011xzw.1	216961;216961;216961;216961;216961;216961;237860;237860;268445;268445;268445;268445;268445	0;0;0;0;0;0;0;0;0;0;0;0;0
chr12	76815047	76831509	16463	*	9.16	8.85	9.41	-0.55	6.41e-08	7.62e-07	468.01	457.13	668	687.95	Promoter (<=1kb)	12	76797963	76822524	24562	2	104886	uc007nyt.3	0	ENSMUSG00000021062	Rab15	RAB15, member RAS oncogene family	uc007nyt.3	104886	0
chr7	134222131	134233961	11831	*	8.77	8.43	9.05	-0.62	6.52e-08	7.72e-07	336.01	352.16	513	547.83	Promoter (<=1kb)	7	133883199	134225097	341899	2	11489	uc009kdp.2	0	ENSMUSG00000054555	Adam12	a disintegrin and metallopeptidase domain 12 (meltrin alpha)	uc009kdp.2	11489	0
chr7	81698093	81734342	36250	*	10.11	9.88	10.3	-0.43	6.52e-08	7.72e-07	954.69	924.06	1224	1302.91	Promoter (<=1kb)	7	81600481	81706925	106445	2	26557	uc009ich.2	0	ENSMUSG00000025813	Homer2	homer scaffolding protein 2	uc009ich.2;uc009ici.2;uc009icj.2;uc009ick.2	26557;26557;26557;26557	0;0;0;0
chr6	42316822	42336396	19575	*	9.32	9.03	9.56	-0.53	6.54e-08	7.75e-07	519.35	525.79	728	780.39	Promoter (<=1kb)	6	42315305	42324640	9336	2	76156	uc009bqu.3	0	ENSMUSG00000029861	Fam131b	family with sequence similarity 131, member B	uc009bqs.1;uc009bqt.1;uc012ekw.1;uc009bqu.3;uc009bqv.3;uc033ipo.1	12723;12723;12723;76156;76156;76156	30137;30137;18023;0;0;0
chr12	83471507	83501518	30012	*	10.08	9.83	10.29	-0.46	6.63e-08	7.83e-07	939.35	879.92	1177	1324.32	Promoter (<=1kb)	12	83213751	83487736	273986	2	70127	uc007odc.2	0	ENSMUSG00000021221	Dpf3	D4, zinc and double PHD fingers, family 3	uc007odc.2;uc007odd.3;uc007ode.3	70127;70127;70127	0;0;0
chr3	89316189	89330380	14192	*	9.21	8.91	9.46	-0.55	6.67e-08	7.87e-07	498.68	463.01	721	689.89	Promoter (<=1kb)	3	89314951	89322879	7929	2	13638	uc008pyq.1	0	ENSMUSG00000028039	Efna3	ephrin A3	uc008pyq.1;uc008pys.1	13638;13639	0;7648
chr6	53266198	53296670	30473	*	10.09	9.85	10.29	-0.44	6.81e-08	8.03e-07	920.02	929.95	1193	1308.75	Promoter (<=1kb)	6	53287303	53391409	104107	1	231991	uc009bzd.3	0	ENSMUSG00000053007	Creb5	cAMP responsive element binding protein 5	uc009bzd.3;uc009bze.3;uc009bzf.3;uc057lqj.1	231991;231991;231991;231991	0;0;0;0
chr5	110125931	110137917	11987	*	8.41	8.72	8.02	0.7	6.84e-08	8.05e-07	428.01	414.94	261	257.86	Promoter (<=1kb)	5	110135830	110163807	27978	1	231600	uc008ypu.3	0	ENSMUSG00000014668	Chfr	checkpoint with forkhead and ring finger domains	uc008ypu.3;uc008ypv.3;uc008ypw.3;uc008ypx.3;uc008ypy.3;uc008ypz.3;uc012eaz.2;uc008yps.2;uc008ypt.2	231600;231600;231600;231600;231600;231600;231600;675812;675812	0;0;0;0;0;0;0;0;0
chr4	148125183	148139535	14353	*	9.27	8.96	9.51	-0.55	6.88e-08	8.09e-07	489.34	510.1	692	769.68	Promoter (<=1kb)	4	148098437	148130698	32262	2	70433	uc008vua.2	0	ENSMUSG00000029005	Draxin	dorsal inhibitory axon guidance protein	uc008vua.2;uc008vub.2;uc008vuc.2	70433;71890;71890	0;0;-955
chr10	22803820	22826104	22285	*	9.64	9.35	9.89	-0.54	6.88e-08	8.09e-07	655.35	651.35	859	1036.3	Promoter (<=1kb)	10	22817263	22820128	2866	2	21412	uc007eps.3	0	ENSMUSG00000045680	Tcf21	transcription factor 21	uc007eps.3	21412	0
chr16	33842517	33857131	14615	*	8.35	8.67	7.94	0.72	6.89e-08	8.09e-07	393.34	418.87	243	249.1	Exon (uc007zan.2/16419, exon 2 of 15)	16	33829665	33949338	119674	1	16419	uc007zan.2	12852	ENSMUSG00000022817	Itgb5	integrin beta 5	uc007zan.2;uc007zao.2	16419;16419	0;0
chr3	83112562	83133895	21334	*	9.68	9.41	9.91	-0.49	6.92e-08	8.12e-07	677.35	687.65	905	1013.92	Distal Intergenic	3	83055538	83072291	16754	1	53317	uc008ppj.1	57024	ENSMUSG00000027998	Plrg1	pleiotropic regulator 1	NA	NA	NA
chr9	65121850	65149677	27828	*	9.86	9.62	10.07	-0.45	6.95e-08	8.15e-07	781.35	792.61	1039	1116.09	Promoter (<=1kb)	9	65141189	65185872	44684	1	19289	uc009qcv.2	0	ENSMUSG00000032394	Igdcc3	immunoglobulin superfamily, DCC subclass, member 3	uc009qcv.2;uc009qcw.2;uc012gvg.2;uc009qcs.2;uc009qct.2;uc009qcu.2	19289;19289;56741;56741;56741;56741	0;0;0;0;0;0
chr8	120650802	120905675	254874	*	12.95	12.85	13.04	-0.19	6.98e-08	8.17e-07	7172.17	7621.04	8361	8506.39	Promoter (<=1kb)	8	120608600	120668142	59543	2	105734727	uc057ccr.1	0	ENSMUSG00000097919	Gm27021	predicted gene, 27021	uc057ccr.1;uc009nrh.2;uc009nri.2;uc009nrj.2;uc009nrk.3;uc057anf.2;uc009nrf.2;uc009nrg.2	105734727;12857;12857;15900;15900;15900;18117;18117	0;0;0;0;0;0;0;0
chr12	102126153	102144473	18321	*	9.4	9.1	9.64	-0.55	7e-08	8.19e-07	551.35	544.43	741	859.2	Promoter (<=1kb)	12	102129419	102266749	137331	1	238384	uc007oty.1	0	ENSMUSG00000041771	Slc24a4	solute carrier family 24 (sodium/potassium/calcium exchanger), member 4	uc007oty.1;uc011yqm.1;uc007otz.1	238384;238384;238384	0;0;0
chr1	127663524	127687693	24170	*	9.72	9.47	9.93	-0.46	7.02e-08	8.2e-07	708.02	711.19	986	969.16	Promoter (<=1kb)	1	127486552	127678021	191470	2	72160	uc007cku.1	0	ENSMUSG00000026347	Tmem163	transmembrane protein 163	uc007cku.1;uc011wqz.1	72160;72160	0;0
chr2	118347756	118392346	44591	*	10.42	10.22	10.61	-0.39	7.09e-08	8.28e-07	1192.69	1187.94	1513	1603.58	Promoter (<=1kb)	2	118388617	118428213	39597	1	27103	uc008lrv.1	0	ENSMUSG00000005102	Eif2ak4	eukaryotic translation initiation factor 2 alpha kinase 4	uc008lrv.1;uc008lrw.2;uc008lrx.2;uc008lru.2	27103;27103;27103;381413	0;0;0;0
chrX	103319181	103330286	11106	*	8.38	7.95	8.71	-0.75	7.16e-08	8.35e-07	260.67	235.43	381	455.39	Promoter (<=1kb)	20	103321398	103330224	8827	1	12592	uc009tzk.1	0	ENSMUSG00000031326	Cdx4	caudal type homeobox 4	uc009tzk.1	12592	0
chr13	66423321	66450524	27204	*	10.17	10.38	9.94	0.44	7.19e-08	8.37e-07	1384.03	1276.22	1028	934.13	Promoter (<=1kb)	13	66418114	66441118	23005	2	76803	uc007qzq.1	0	ENSMUSG00000074832	2410141K09Rik	RIKEN cDNA 2410141K09 gene	uc007qzp.2;uc007qzq.1;uc056yub.1;uc029sbw.1	76803;76803;76803;76803	0;0;0;0
chr12	89802668	89825356	22689	*	9.33	9.04	9.56	-0.52	7.45e-08	8.67e-07	532.01	523.83	758	755.09	Promoter (<=1kb)	12	89812483	90334935	522453	1	18191	uc007oke.4	0	ENSMUSG00000066392	Nrxn3	neurexin III	uc007oka.1;uc033ger.2;uc007okc.3;uc007oke.4	18191;18191;18191;18191	0;0;0;0
chr15	83770886	83784918	14033	*	8.81	8.48	9.08	-0.61	7.47e-08	8.68e-07	351.34	360.99	535	550.75	Promoter (<=1kb)	15	83780023	83858474	78452	1	223726	uc007xbk.1	0	ENSMUSG00000041708	Mpped1	metallophosphoesterase domain containing 1	uc007xbk.1;uc007xbl.1;uc007xbm.1	223726;223726;223726	0;0;-3962
chr3	84470169	84485907	15739	*	9.3	9	9.55	-0.56	7.51e-08	8.72e-07	483.34	537.56	706	797.9	Promoter (<=1kb)	3	84442196	84479491	37296	2	229474	uc008pqc.3	0	ENSMUSG00000041842	Fhdc1	FH2 domain containing 1	uc008pqc.3;uc008pqd.3	229474;229474	0;0
chr7	97076038	97104807	28770	*	9.76	9.5	9.98	-0.48	7.69e-08	8.92e-07	698.02	748.47	959	1058.68	Promoter (<=1kb)	7	97081751	97308951	227201	1	14389	uc009iix.2	0	ENSMUSG00000004508	Gab2	growth factor receptor bound protein 2-associated protein 2	uc009iix.2;uc009iiy.2	14389;14389	0;0
chr2	103559398	103579785	20388	*	9.49	9.22	9.72	-0.5	7.77e-08	8.99e-07	604.68	587.59	818	869.91	Promoter (<=1kb)	2	103566310	103718423	152114	1	99382	uc008lix.1	0	ENSMUSG00000032724	Abtb2	ankyrin repeat and BTB (POZ) domain containing 2	uc008lix.1	99382	0
chr4	120031248	120038022	6775	*	8.23	7.82	8.56	-0.74	7.83e-08	9.06e-07	216.67	235.43	380	372.68	Intron (uc008una.1/16656, intron 2 of 8)	4	119814678	120135411	320734	1	16656	uc008una.1	216570	ENSMUSG00000028634	Hivep3	human immunodeficiency virus type I enhancer binding protein 3	uc008una.1	16656	0
chr15	78710834	78722909	12076	*	8.64	8.27	8.93	-0.66	7.87e-08	9.09e-07	295.34	322.73	466	507.93	Promoter (<=1kb)	15	78670003	78718113	48111	2	207393	uc007wrf.2	0	ENSMUSG00000043460	Elfn2	leucine rich repeat and fibronectin type III, extracellular 2	uc007wrf.2;uc007wrg.2	207393;207393	0;0
chr6	83084330	83089233	4904	*	7.99	7.54	8.33	-0.8	8.06e-08	9.3e-07	186.67	184.42	329	316.24	Promoter (<=1kb)	6	83086365	83088241	1877	1	16815	uc009cmi.1	0	ENSMUSG00000034968	Lbx2	ladybird homeobox 2	uc009cmi.1;uc009cmg.1;uc009cmh.1	16815;69837;69837	0;5940;5700
chr2	173573286	173587140	13855	*	8.98	8.64	9.25	-0.61	8.07e-08	9.31e-07	417.34	380.61	574	643.19	Promoter (<=1kb)	2	173568661	173578341	9681	2	70065	uc008odu.2	0	ENSMUSG00000027517	Ankrd60	ankyrin repeat domain 60	uc008odw.2;uc008odx.2;uc008odz.2;uc008oea.2;uc008oeb.2;uc008odu.2;uc008odv.2	100043911;100043911;100043911;100043911;100043911;70065;70065	0;0;0;0;0;0;0
chr15	11890763	11918105	27343	*	9.93	9.68	10.13	-0.45	8.33e-08	9.6e-07	826.02	818.12	1073	1172.52	Promoter (<=1kb)	15	11839896	11890986	51091	2	18162	uc007vhd.2	0	ENSMUSG00000022206	Npr3	natriuretic peptide receptor 3	uc007vhd.2;uc007vhe.2;uc007vhf.2;uc007vhg.2;uc007vhh.1	18162;18162;18162;18162;381002	0;0;0;0;0
chr16	10177865	10199069	21205	*	9.14	9.4	8.82	0.57	8.39e-08	9.66e-07	680.02	668.03	485	420.36	Promoter (<=1kb)	16	10192906	10214231	21326	1	75329	uc007ydf.2	0	ENSMUSG00000039200	Atf7ip2	activating transcription factor 7 interacting protein 2	uc007yde.1;uc007ydf.2;uc007ydg.2;uc007ydh.2;uc007ydi.2	68172;75329;75329;75329;75329	7637;0;0;0;0
chr10	62128029	62141939	13911	*	9.04	8.72	9.31	-0.58	8.4e-08	9.66e-07	444.68	401.21	643	623.72	Promoter (<=1kb)	10	62133090	62134763	1674	1	11925	uc007fgu.1	0	ENSMUSG00000044312	Neurog3	neurogenin 3	uc007fgu.1	11925	0
chr1	86667318	86700812	33495	*	10.05	9.82	10.24	-0.42	8.41e-08	9.66e-07	902.69	906.4	1218	1200.74	Promoter (<=1kb)	1	86666293	86670573	4281	2	18159	uc007bvt.2	0	ENSMUSG00000026241	Nppc	natriuretic peptide type C	uc007bvt.2;uc057kfw.1;uc007bvu.2;uc007bvv.2;uc007bvw.2	18159;208718;208718;208718;208718	0;-2992;-2992;-2992;-2992
chr3	123442499	123455231	12733	*	8.96	8.64	9.23	-0.58	8.46e-08	9.7e-07	392.68	407.1	579	618.86	Promoter (<=1kb)	3	123446913	123506602	59690	1	19142	uc008rfl.2	0	ENSMUSG00000027978	Prss12	protease, serine 12 neurotrypsin (motopsin)	uc008rfl.2	19142	0
chr13	76046669	76062840	16172	*	9.43	9.15	9.67	-0.52	8.48e-08	9.71e-07	585.35	547.37	782	841.69	Promoter (<=1kb)	13	76054851	76056996	2146	2	238725	uc007rgg.1	0	ENSMUSG00000045509	Gpr150	G protein-coupled receptor 150	uc007rgg.1;uc007rgh.1	238725;77041	0;0
chr2	136082108	136132160	50053	*	10.66	10.45	10.84	-0.38	8.5e-08	9.73e-07	1464.7	1339.99	1790	1864.36	3' UTR	2	136081088	136387967	306880	2	241656	uc008moh.1	255807	ENSMUSG00000039913	Pak7	p21 (RAC1) activated kinase 7	uc008moh.1;uc008moi.1;uc008moj.1	241656;241656;241656	0;0;0
chr4	130070805	130109364	38560	*	10.05	9.81	10.26	-0.45	8.76e-08	1e-06	878.69	916.21	1152	1300.97	Promoter (<=1kb)	4	130097604	130099277	1674	1	107581	uc008uyv.2	0	ENSMUSG00000040690	Col16a1	collagen, type XVI, alpha 1	uc008uyr.2;uc008uys.2;uc008uyt.2;uc008uyu.2;uc008uyv.2;uc008uyw.1	107581;107581;107581;107581;107581;67898	0;0;0;0;0;0
chr13	105434536	105452171	17636	*	9.41	9.14	9.64	-0.5	8.86e-08	1.01e-06	568.68	558.16	793	804.71	Promoter (<=1kb)	13	105443693	105448133	4441	1	15550	uc007rtu.2	0	ENSMUSG00000021721	Htr1a	5-hydroxytryptamine (serotonin) receptor 1A	uc007rtu.2	15550	0
chr11	101076343	101086567	10225	*	8.64	8.28	8.93	-0.65	8.86e-08	1.01e-06	309.34	311.94	463	512.8	Promoter (<=1kb)	11	101078411	101080505	2095	1	15485	uc007lnb.1	0	ENSMUSG00000019301	Hsd17b1	hydroxysteroid (17-beta) dehydrogenase 1	uc007lnb.1;uc007lne.2;uc007lnf.2;uc007lng.2;uc007lmz.3;uc007lna.3;uc007lnc.2;uc007lnd.2	15485;21428;21428;21428;27419;27419;71743;71743	0;-723;-723;-723;0;0;0;0
chr13	49138984	49156799	17816	*	9.14	8.82	9.4	-0.58	8.94e-08	1.02e-06	414.01	490.48	678	672.38	Promoter (<=1kb)	13	49036302	49148328	112027	2	75607	uc007qir.3	0	ENSMUSG00000037989	Wnk2	WNK lysine deficient protein kinase 2	uc007qir.3;uc009val.2;uc007qiu.2	75607;75607;75607	0;0;0
chr2	165095740	165118566	22827	*	9.35	9.06	9.59	-0.53	9e-08	1.02e-06	520.68	543.45	728	810.55	3' UTR	2	165111507	165181459	69953	2	104010	uc012cjh.1	62893	ENSMUSG00000053166	Cdh22	cadherin 22	uc012cjh.1;uc008nxc.2;uc012cjg.1	104010;104010;72211	0;0;-4990
chr13	3385585	3424297	38713	*	9.97	10.18	9.73	0.45	9.06e-08	1.03e-06	1204.03	1118.29	885	815.41	Distal Intergenic	13	3478260	3485220	6961	1	76937	uc007pit.1	-53963	ENSMUSG00000097709	2810429I04Rik	RIKEN cDNA 2810429I04 gene	NA	NA	NA
chr14	63930673	63959439	28767	*	9.83	9.59	10.04	-0.46	9.21e-08	1.05e-06	762.02	776.92	1012	1099.54	Promoter (<=1kb)	14	63943706	63950732	7027	1	20680	uc007uhy.1	0	ENSMUSG00000063060	Sox7	SRY (sex determining region Y)-box 7	uc007uhy.1	20680	0
chr16	28424926	28463098	38173	*	10.36	10.15	10.55	-0.4	9.22e-08	1.05e-06	1164.69	1109.46	1456	1540.34	Promoter (<=1kb)	16	28157783	28446075	288293	2	14167	uc007yvr.3	0	ENSMUSG00000022523	Fgf12	fibroblast growth factor 12	uc007yvr.3;uc007yvs.3;uc007yvt.3;uc007yvu.2	14167;14167;14167;14167	0;0;0;0
chr4	131834626	131843072	8447	*	8.52	8.14	8.82	-0.68	9.27e-08	1.05e-06	288.67	274.67	429	473.87	Promoter (<=1kb)	4	131768457	131838278	69822	2	19273	uc008vaa.1	0	ENSMUSG00000028909	Ptpru	protein tyrosine phosphatase, receptor type, U	uc008vaa.1;uc008vab.1;uc008vac.1;uc008vae.2	19273;19273;19273;26922	0;0;0;-399
chr3	7661611	7675784	14174	*	8.68	8.97	8.32	0.65	9.3e-08	1.05e-06	527.35	472.82	317	321.11	Exon (uc008ool.1/uc008ool.1, exon 2 of 3)	3	7572028	7613760	41733	2	16196	uc008ook.2	-47851	ENSMUSG00000040329	Il7	interleukin 7	NA	NA	NA
chr6	92938588	92948407	9820	*	8.64	8.29	8.93	-0.64	9.33e-08	1.06e-06	312.67	311.94	500	473.87	Promoter (<=1kb)	6	92940582	93111749	171168	1	330385	uc012epf.1	0	ENSMUSG00000097462	9530026P05Rik	RIKEN cDNA 9530026P05 gene	uc012epf.1;uc012epg.1;uc009czg.2;uc009czh.2;uc012eph.1	330385;330385;330385;330385;330385	0;0;0;0;0
chr14	14342586	14363149	20564	*	8.77	9.05	8.42	0.63	9.42e-08	1.06e-06	525.35	533.64	362	322.08	Promoter (<=1kb)	14	14346495	14355490	8996	1	16188	uc007sgm.1	0	ENSMUSG00000068758	Il3ra	interleukin 3 receptor, alpha chain	uc007sgm.1;uc011zgb.1;uc011zgc.1	16188;16188;16188	0;0;0
chr3	157562688	157575953	13266	*	8.77	8.43	9.04	-0.61	9.43e-08	1.06e-06	342.01	348.24	534	520.58	Promoter (<=1kb)	3	157566892	157607595	40704	1	19218	uc008rvg.1	0	ENSMUSG00000040016	Ptger3	prostaglandin E receptor 3 (subtype EP3)	uc008rvg.1;uc008rvh.1;uc008rvi.1	19218;19218;19218	0;0;0
chr11	101260742	101273788	13047	*	9.12	8.81	9.38	-0.58	9.53e-08	1.08e-06	422.01	472.82	632	702.54	Promoter (<=1kb)	11	101260567	101275103	14537	1	69847	uc057kmk.1	175	ENSMUSG00000035112	Wnk4	WNK lysine deficient protein kinase 4	uc007loa.2;uc007lob.2;uc007loc.2;uc007lod.2;uc033gaf.1;uc007log.1;uc057kmk.1;uc007loe.2;uc007lof.2	28084;28084;28084;28084;28084;52469;69847;69847;69847	0;0;0;0;0;5160;0;0;0
chr17	62863810	62896869	33060	*	10.31	10.1	10.49	-0.39	9.55e-08	1.08e-06	1087.36	1102.59	1404	1473.2	Promoter (<=1kb)	17	62602957	62881317	278361	2	13640	uc008dfg.2	0	ENSMUSG00000048915	Efna5	ephrin A5	uc008dfg.2;uc008dfh.2	13640;13640	0;0
chr4	83398475	83419504	21030	*	8.93	9.2	8.61	0.58	9.58e-08	1.08e-06	596.68	576.8	397	385.33	Promoter (<=1kb)	4	83417744	83442081	24338	1	77634	uc008tkt.1	0	ENSMUSG00000028483	Snapc3	small nuclear RNA activating complex, polypeptide 3	uc008tkt.1;uc008tku.1;uc012dgp.1;uc008tkv.1	77634;77634;77634;77634	0;0;0;0
chrX	71661237	71672027	10791	*	8.4	8	8.71	-0.71	9.74e-08	1.1e-06	244.67	265.84	391	445.66	Promoter (<=1kb)	20	71663667	71669257	5591	1	14765	uc009tke.2	0	ENSMUSG00000056380	Gpr50	G-protein-coupled receptor 50	uc009tke.2;uc012hjs.2	14765;14765	0;0
chr7	144827582	144841305	13724	*	9.06	8.74	9.32	-0.58	9.81e-08	1.1e-06	452.01	404.15	626	654.86	Promoter (<=1kb)	7	144838612	144843348	4737	1	14174	uc009kqp.2	0	ENSMUSG00000031074	Fgf3	fibroblast growth factor 3	uc009kqp.2	14174	0
chr7	126947808	126963677	15870	*	8.88	8.52	9.16	-0.64	9.83e-08	1.1e-06	401.34	334.51	564	581.88	Promoter (<=1kb)	7	126950535	126970606	20072	1	233878	uc009jtq.2	0	ENSMUSG00000030683	Sez6l2	seizure related 6 homolog like 2	uc009jtm.1;uc009jtq.2;uc009jtr.2;uc012ftx.2;uc009jtn.2;uc009jto.1;uc009jtp.1	233877;233878;233878;233878;233879;233879;233879	18929;0;0;0;0;0;0
chr7	43087509	43142073	54565	*	10.67	10.84	10.47	0.36	9.92e-08	1.11e-06	1870.04	1784.36	1451	1393.41	Distal Intergenic	7	43177588	43192109	14522	1	668620	uc009gmh.1	-35515	ENSMUSG00000064194	Zfp936	zinc finger protein 936	NA	NA	NA
chr10	110900547	110919028	18482	*	9.03	9.29	8.7	0.59	1e-07	1.12e-06	646.01	608.19	444	390.19	Promoter (1-2kb)	10	110920176	110939514	19339	1	13008	uc007gzs.2	-1148	ENSMUSG00000020186	Csrp2	cysteine and glycine-rich protein 2	uc007gzs.2;uc007gzq.2;uc007gzr.2	13008;75630;75630	-1148;0;0
chr15	99662510	99677830	15321	*	8.93	8.61	9.19	-0.58	1.01e-07	1.13e-06	374.01	406.12	581	588.69	Promoter (<=1kb)	15	99670718	99701130	30413	1	11419	uc007xqa.2	0	ENSMUSG00000023017	Asic1	acid-sensing (proton-gated) ion channel 1	uc007xqa.2	11419	0
chr6	144765777	144794667	28891	*	9.66	9.41	9.88	-0.47	1.01e-07	1.13e-06	660.02	700.4	924	960.4	Promoter (<=1kb)	6	143843739	144781977	938239	2	20678	uc009eqn.1	0	ENSMUSG00000041540	Sox5	SRY (sex determining region Y)-box 5	uc009eqn.1;uc009eqq.1	20678;20678	0;0
chr11	81143673	81162278	18606	*	9.3	8.99	9.55	-0.56	1.01e-07	1.13e-06	542.68	470.86	717	782.33	Promoter (<=1kb)	11	80880163	81152903	272741	2	11418	uc007kml.2	0	ENSMUSG00000020704	Asic2	acid-sensing (proton-gated) ion channel 2	uc007kml.2;uc007kmm.2	11418;11418	0;0
chr1	87499917	87521265	21349	*	9.52	9.25	9.75	-0.5	1.01e-07	1.13e-06	602.68	616.04	823	896.18	Promoter (<=1kb)	1	87476829	87510362	33534	2	53972	uc007bwx.2	0	ENSMUSG00000026259	Ngef	neuronal guanine nucleotide exchange factor	uc007bwx.2;uc007bwy.2	53972;53972	0;0
chr6	120486318	120502476	16159	*	8.97	8.65	9.24	-0.58	1.02e-07	1.14e-06	403.34	402.19	576	630.54	Promoter (<=1kb)	6	120488939	120493807	4869	2	94047	uc009dnk.1	0	ENSMUSG00000094626	Tmem121b	transmembrane protein 121B	uc009dnj.2;uc009dnk.1	16172;94047	0;0
chr3	92067506	92089213	21708	*	9.7	9.44	9.92	-0.48	1.02e-07	1.14e-06	696.68	688.63	913	1025.59	Promoter (<=1kb)	3	92080271	92083142	2872	2	16939	uc008qdk.1	0	ENSMUSG00000043165	Lor	loricrin	uc008qdk.1	16939	0
chr10	107266898	107278690	11793	*	8.82	8.48	9.09	-0.61	1.02e-07	1.14e-06	372.01	344.32	541	552.69	Promoter (<=1kb)	10	107271831	107425143	153313	1	108030	uc007gyx.1	0	ENSMUSG00000019906	Lin7a	lin-7 homolog A (C. elegans)	uc007gyx.1;uc007gyy.1;uc033fsp.1	108030;108030;108030	0;0;0
chr15	40649645	40661435	11791	*	9.08	8.76	9.34	-0.58	1.04e-07	1.16e-06	445.34	422.79	612	682.11	Promoter (<=1kb)	15	40655042	40775259	120218	1	22762	uc007voq.1	0	ENSMUSG00000022306	Zfpm2	zinc finger protein, multitype 2	uc007voq.1;uc007vor.1;uc007vos.1	22762;22762;22762	0;0;0
chr1	186699481	186712551	13071	*	8.71	8.35	8.99	-0.64	1.05e-07	1.16e-06	322.67	330.58	479	538.1	Promoter (<=1kb)	1	186623186	186705992	82807	2	21808	uc007dzo.2	0	ENSMUSG00000039239	Tgfb2	transforming growth factor, beta 2	uc007dzo.2;uc007dzp.2	21808;21808	0;0
chr1	135892034	135956123	64090	*	10.79	10.61	10.95	-0.34	1.07e-07	1.18e-06	1520.03	1596.01	1971	1983.07	Promoter (<=1kb)	1	135871394	135919207	47814	2	18772	uc007cub.2	0	ENSMUSG00000026413	Pkp1	plakophilin 1	uc007cub.2;uc011wss.2;uc007cud.2;uc007cuc.2;uc011wst.1;uc011wsu.1	18772;18772;226438;226438;226438;226438	0;0;0;0;0;0
chr11	52741478	52775283	33806	*	10.11	9.88	10.3	-0.42	1.08e-07	1.2e-06	948.69	933.87	1213	1309.72	Promoter (<=1kb)	11	52764706	53187347	422642	1	320027	uc007ivp.1	0	ENSMUSG00000036264	Fstl4	follistatin-like 4	uc007ivp.1;uc011xup.1	320027;320027	0;0
chr6	55442601	55457646	15046	*	8.92	8.58	9.19	-0.61	1.08e-07	1.2e-06	375.34	391.4	542	629.56	Promoter (<=1kb)	6	55451978	55501455	49478	1	11517	uc009cat.2	0	ENSMUSG00000029778	Adcyap1r1	adenylate cyclase activating polypeptide 1 receptor 1	uc009cat.2;uc009cau.2	11517;11517	0;0
chr1	50915577	50948994	33418	*	10.11	9.88	10.31	-0.43	1.09e-07	1.2e-06	928.02	962.32	1213	1327.24	Promoter (<=1kb)	1	50927523	51187270	259748	1	56363	uc007axj.1	0	ENSMUSG00000026109	Tmeff2	transmembrane protein with EGF-like and two follistatin-like domains 2	uc007axi.1;uc007axj.1	56363;56363	0;0
chr4	120727986	120761512	33527	*	10.13	9.88	10.34	-0.46	1.1e-07	1.22e-06	924.02	959.37	1193	1398.27	Promoter (<=1kb)	4	120697473	120747176	49704	2	60613	uc008unm.1	0	ENSMUSG00000028631	Kcnq4	potassium voltage-gated channel, subfamily Q, member 4	uc008unn.2;uc008uno.2;uc008unp.2;uc008unm.1;uc012dkl.1	18046;18046;18046;60613;60613	0;0;0;0;0
chr2	174315973	174336299	20327	*	9.51	9.24	9.73	-0.49	1.11e-07	1.22e-06	614.68	598.38	841	859.2	Promoter (<=1kb)	2	174327768	174328846	1079	1	14683	uc008oex.2	0	ENSMUSG00000027523	Gnas	GNAS (guanine nucleotide binding protein, alpha stimulating) complex locus	uc008oer.2;uc008oes.2;uc008oeu.3;uc008oew.3;uc033hrq.2;uc008oex.2;uc008oey.3;uc033hrr.3;uc033hrs.2;uc057lez.1	14683;14683;14683;14683;14683;14683;14683;14683;14683;14683	0;0;0;0;0;0;0;0;0;0
chr4	44656512	44674508	17997	*	9.23	8.94	9.47	-0.53	1.13e-07	1.24e-06	486.01	495.38	695	720.06	Intron (uc008srx.1/18507, intron 5 of 9)	4	44531506	44710440	178935	2	18507	uc008srx.1	35932	ENSMUSG00000014030	Pax5	paired box 5	uc008srx.1	18507	0
chr2	113738590	113769874	31285	*	10.03	9.8	10.22	-0.42	1.13e-07	1.24e-06	894.69	889.73	1164	1227.99	Promoter (<=1kb)	2	113748675	113758648	9974	2	23892	uc008lpp.2	0	ENSMUSG00000074934	Grem1	gremlin 1, DAN family BMP antagonist	uc008lpp.2	23892	0
chr7	16460303	16487551	27249	*	9.78	9.54	9.99	-0.46	1.15e-07	1.26e-06	727.35	758.28	984	1054.78	Promoter (<=1kb)	7	16455721	16476780	21060	2	18142	uc009fhv.2	0	ENSMUSG00000001988	Npas1	neuronal PAS domain protein 1	uc009fhv.2;uc009fhu.1	18142;69094	0;7524
chr1	17083327	17116547	33221	*	10.21	9.98	10.4	-0.42	1.15e-07	1.26e-06	1024.02	1002.54	1289	1420.65	Promoter (<=1kb)	1	16994938	17097889	102952	2	57339	uc007aka.3	0	ENSMUSG00000042686	Jph1	junctophilin 1	uc007aka.3	57339	0
chr18	59172010	59188712	16703	*	9.27	8.97	9.51	-0.54	1.16e-07	1.27e-06	526.68	476.74	720	738.54	Promoter (<=1kb)	18	59175340	59182021	6682	1	78923	uc008ezv.1	0	ENSMUSG00000058152	Chsy3	chondroitin sulfate synthase 3	uc008ezv.1;uc008ezw.1	78923;78923	0;0
chr3	109334571	109345840	11270	*	8.69	8.3	9	-0.7	1.17e-07	1.29e-06	334.67	295.27	458	568.26	Promoter (<=1kb)	3	109340683	109563541	222859	1	57257	uc008raf.1	0	ENSMUSG00000033721	Vav3	vav 3 oncogene	uc008raf.1;uc008rag.1	57257;57257	0;0
chr3	38882156	38895696	13541	*	9.05	8.72	9.32	-0.6	1.2e-07	1.31e-06	434.01	412	589	690.86	Promoter (<=1kb)	3	38886940	38952429	65490	1	329628	uc008pbe.1	0	ENSMUSG00000046743	Fat4	FAT atypical cadherin 4	uc008pbe.1;uc008pbf.2	329628;329628	0;0
chr17	35309762	35367224	57463	*	10.95	10.77	11.11	-0.34	1.2e-07	1.31e-06	1745.37	1758.85	2130	2302.23	Promoter (<=1kb)	17	35320558	35325099	4542	1	15006	uc008chj.2	0	ENSMUSG00000079507	H2-Q1	histocompatibility 2, Q region locus 1	uc029thj.1;uc008chj.2;uc012ard.1;uc057kxq.1;uc008chl.1;uc008chb.2	14980;15006;15006;15006;15013;53817	0;0;0;0;0;0
chr15	83720206	83726260	6055	*	7.89	7.41	8.25	-0.84	1.2e-07	1.31e-06	181.34	159.9	293	316.24	Promoter (<=1kb)	15	83602583	83725039	122457	2	64706	uc007xbi.2	0	ENSMUSG00000016763	Scube1	signal peptide, CUB domain, EGF-like 1	uc007xbi.2;uc007xbj.2;uc011zxe.2	64706;64706;64706	0;0;0
chr5	110972639	110988335	15697	*	8.96	8.63	9.22	-0.59	1.21e-07	1.32e-06	413.34	378.65	573	622.75	Intron (uc033ild.2/209683, intron 2 of 22)	5	110879803	111289780	409978	1	209683	uc033ild.2	92836	ENSMUSG00000033209	Ttc28	tetratricopeptide repeat domain 28	uc033ild.2	209683	0
chr18	35639905	35661421	21517	*	9.83	9.57	10.05	-0.48	1.21e-07	1.32e-06	738.02	782.8	989	1126.79	Promoter (<=1kb)	18	35650351	35655199	4849	2	381148	uc033hgc.1	0	ENSMUSG00000073600	Prob1	proline rich basic protein 1	uc033hgc.1;uc008emm.2;uc008emn.1;uc008emo.2;uc008emp.2	381148;69816;71242;71242;71242	0;0;0;0;0
chr2	180090584	180106314	15731	*	8.99	8.68	9.25	-0.57	1.21e-07	1.32e-06	416.68	402.19	604	610.1	Promoter (<=1kb)	2	180099465	180104407	4943	2	99296	uc008oij.2	0	ENSMUSG00000039059	Hrh3	histamine receptor H3	uc008oid.1;uc008oie.1;uc008oif.1;uc008oig.1;uc008oih.1;uc012clv.1;uc012clw.1;uc008oii.1;uc008oij.2;uc029ujf.2	52856;52856;52856;52856;52856;52856;52856;52856;99296;99296	19991;19991;19991;19991;19991;19991;18790;6035;0;0
chr6	58058870	58068029	9160	*	7.8	8.16	7.31	0.85	1.22e-07	1.33e-06	294.01	278.59	163	154.71	Distal Intergenic	6	58008183	58009202	1020	2	171190	uc009ccv.1	-49668	ENSMUSG00000048697	Vmn1r26	vomeronasal 1 receptor 26	NA	NA	NA
chr13	103328639	103345956	17318	*	9.23	8.94	9.47	-0.53	1.23e-07	1.34e-06	482.01	502.25	692	727.84	Promoter (<=1kb)	13	102732488	103334492	602005	2	328329	uc007rsb.3	0	ENSMUSG00000034751	Mast4	microtubule associated serine/threonine kinase family member 4	uc007rsb.3;uc007rse.2;uc007rsf.2	328329;328329;328329	0;0;0
chr18	67086384	67095457	9074	*	8.45	8.07	8.75	-0.67	1.24e-07	1.35e-06	263.34	275.65	423	435.93	Promoter (<=1kb)	18	67088298	67192846	104549	1	14680	uc008flr.2	0	ENSMUSG00000024524	Gnal	guanine nucleotide binding protein, alpha stimulating, olfactory type	uc008flr.2;uc008fls.3	14680;14680	0;0
chr6	32574539	32603911	29373	*	9.85	9.62	10.06	-0.44	1.25e-07	1.35e-06	785.35	785.75	1040	1091.76	Promoter (<=1kb)	6	32144543	32588192	443650	2	243743	uc009bgm.4	0	ENSMUSG00000029765	Plxna4	plexin A4	uc009bgm.4	243743	0
chr10	43158132	43193540	35409	*	10.36	10.14	10.55	-0.41	1.25e-07	1.36e-06	1112.69	1144.77	1413	1594.83	Promoter (<=1kb)	10	43002500	43174530	172031	2	109205	uc007ezf.1	0	ENSMUSG00000038248	Sobp	sine oculis binding protein	uc007ezf.1;uc007ezg.1;uc011xdj.2	109205;109205;74530	0;0;0
chr4	65223212	65281576	58365	*	11.16	10.98	11.32	-0.34	1.26e-07	1.36e-06	2110.05	1930.52	2475	2641.83	Exon (uc008thm.1/18491, exon 8 of 22)	4	65124174	65357509	233336	1	18491	uc008thm.1	99038	ENSMUSG00000028370	Pappa	pregnancy-associated plasma protein A	uc008thm.1;uc012dgb.1	18491;18491	0;0
chr7	143970519	143985382	14864	*	9.03	8.71	9.29	-0.58	1.26e-07	1.36e-06	440.68	399.25	614	638.32	Distal Intergenic	7	144009254	144009338	85	1	100526562	uc057akb.1	-23872	ENSMUSG00000093221	Mir3105	microRNA 3105	NA	NA	NA
chrX	120289236	120294522	5287	*	7.4	6.8	7.83	-1.02	1.27e-07	1.37e-06	125.34	98.1	215	239.37	Promoter (<=1kb)	20	120290327	120910619	620293	1	245578	uc009uef.3	0	ENSMUSG00000034755	Pcdh11x	protocadherin 11 X-linked	uc009uef.3;uc009ueh.3;uc009uei.3;uc009uej.3	245578;245578;245578;245578	0;0;0;0
chr5	72864042	72883361	19320	*	9.47	9.19	9.71	-0.51	1.27e-07	1.38e-06	594.01	577.78	787	884.5	Promoter (<=1kb)	5	72755718	72868448	112731	2	21682	uc008xsc.3	0	ENSMUSG00000029217	Tec	tec protein tyrosine kinase	uc008xsc.3;uc008xsd.3;uc008xse.3;uc008xsf.3;uc008xsg.2	21682;21682;21682;21682;21682	0;0;0;0;0
chr12	100886598	100909115	22518	*	9.49	9.2	9.72	-0.52	1.29e-07	1.39e-06	600.68	576.8	787	902.99	Promoter (<=1kb)	12	100876682	100899524	22843	2	238377	uc011yqc.1	0	ENSMUSG00000047415	Gpr68	G protein-coupled receptor 68	uc007osy.1;uc011yqc.1;uc007ota.2;uc007otb.2;uc007otd.1;uc007ote.1	217830;238377;238377;238377;68339;68339	0;0;0;0;36793;119868
chr9	58474658	58491258	16601	*	9.28	8.99	9.52	-0.54	1.29e-07	1.39e-06	519.35	494.4	698	774.55	Promoter (<=1kb)	9	58488603	58490485	1883	1	319477	uc057lzp.1	0	ENSMUSG00000066607	Insyn1	inhibitory synaptic factor 1	uc057lzp.1;uc009pwz.1;uc009pxa.1	319477;319477;319477	0;0;0
chr4	138390461	138401369	10909	*	8.94	8.6	9.22	-0.61	1.34e-07	1.44e-06	404.01	374.72	551	640.27	Promoter (<=1kb)	4	138394092	138396458	2367	2	625638	uc008vkx.2	0	ENSMUSG00000078235	Fam43b	family with sequence similarity 43, member B	uc008vkx.2	625638	0
chr19	37167802	37180804	13003	*	8.93	8.62	9.19	-0.58	1.34e-07	1.44e-06	398.68	385.52	578	591.61	Promoter (<=1kb)	19	37021291	37176063	154773	2	208922	uc056zig.1	0	ENSMUSG00000039652	Cpeb3	cytoplasmic polyadenylation element binding protein 3	uc056zig.1;uc008hhy.1;uc008hhz.2;uc008hia.2;uc008hib.2;uc008hic.2;uc008hid.1	208922;208922;208922;208922;208922;208922;319931	0;0;0;0;0;0;0
chr10	60819895	60839424	19530	*	9.37	9.1	9.61	-0.51	1.36e-07	1.46e-06	549.35	544.43	750	807.63	Promoter (<=1kb)	10	60762595	60820641	58047	2	107449	uc007ffd.1	0	ENSMUSG00000020099	Unc5b	unc-5 netrin receptor B	uc007ffd.1;uc007ffe.1;uc007fff.1	107449;107449;107449	0;0;0
chr16	30300160	30315472	15313	*	9.25	8.95	9.49	-0.54	1.38e-07	1.48e-06	464.68	523.83	695	745.36	Promoter (<=1kb)	16	30307685	30310781	3097	2	14729	uc007ywo.2	0	ENSMUSG00000047953	Gp5	glycoprotein 5 (platelet)	uc007ywo.2;uc012aee.2;uc012aef.2	14729;224088;224088	0;0;0
chr7	82837027	82882137	45111	*	10.42	10.22	10.59	-0.37	1.39e-07	1.49e-06	1170.69	1209.52	1530	1554.93	Promoter (<=1kb)	7	82867333	82871576	4244	1	108797	uc009idj.2	0	ENSMUSG00000057706	Mex3b	mex3 RNA binding family member B	uc009idj.2	108797	0
chr3	156555967	156575656	19690	*	9.25	8.96	9.49	-0.53	1.39e-07	1.49e-06	482.68	511.08	747	689.89	Promoter (<=1kb)	3	156561794	157171829	610036	1	320840	uc008rvb.1	0	ENSMUSG00000040037	Negr1	neuronal growth regulator 1	uc008rvb.1;uc008rvc.2;uc008ruy.1;uc057lha.1;uc008ruz.1;uc008rva.1	320840;320840;329782;329782;329782;329782	0;0;0;0;0;0
chr2	68460627	68480603	19977	*	9.53	9.27	9.75	-0.48	1.41e-07	1.51e-06	618.68	617.02	845	877.69	Promoter (<=1kb)	2	68210447	68471981	261535	2	53416	uc008jxo.1	0	ENSMUSG00000027030	Stk39	serine/threonine kinase 39	uc008jxo.1;uc008jxp.1	53416;53416	0;0
chr6	85123788	85130264	6477	*	8	7.56	8.34	-0.78	1.41e-07	1.51e-06	192.67	183.44	320	326.94	Promoter (<=1kb)	6	85111416	85126094	14679	2	545861	uc009cpe.1	0	ENSMUSG00000072952	Gm5878	predicted gene 5878	uc009cpg.2;uc012eod.1;uc009cpe.1	20751;20751;545861	7500;7500;0
chr12	31541446	31565467	24022	*	9.62	9.36	9.83	-0.47	1.44e-07	1.54e-06	669.35	649.39	900	924.4	Promoter (<=1kb)	12	31519819	31559969	40151	2	23985	uc007nho.1	0	ENSMUSG00000020651	Slc26a4	solute carrier family 26, member 4	uc007nho.1	23985	0
chr3	107094989	107118801	23813	*	9.54	9.28	9.76	-0.48	1.46e-07	1.55e-06	601.35	641.54	844	895.2	Promoter (<=1kb)	3	107101567	107115005	13439	1	16490	uc008qws.2	0	ENSMUSG00000040724	Kcna2	potassium voltage-gated channel, shaker-related subfamily, member 2	uc008qws.2	16490	0
chr5	117836881	117847597	10717	*	8.64	8.29	8.92	-0.64	1.46e-07	1.56e-06	311.34	313.91	466	505.01	Promoter (<=1kb)	5	117842186	117958840	116655	1	18125	uc008zfx.4	0	ENSMUSG00000029361	Nos1	nitric oxide synthase 1, neuronal	uc008zfx.4	18125	0
chr7	16944112	16951888	7777	*	8.44	8.04	8.76	-0.72	1.48e-07	1.58e-06	270.67	256.03	392	473.87	Promoter (<=1kb)	7	16944682	16948828	4147	1	434128	uc009fio.2	0	ENSMUSG00000070802	Pnmal2	PNMA-like 2	uc009fio.2	434128	0
chrX	48339387	48348973	9587	*	8.12	7.7	8.45	-0.75	1.49e-07	1.58e-06	210.67	205.02	335	365.87	Promoter (<=1kb)	20	48341358	48406728	65371	1	320376	uc009tcc.1	0	ENSMUSG00000036959	Bcorl1	BCL6 co-repressor-like 1	uc009tcc.1	320376	0
chr1	86039056	86052861	13806	*	9.23	8.91	9.5	-0.59	1.49e-07	1.59e-06	485.34	476.74	648	797.9	Promoter (<=1kb)	1	86045863	86055456	9594	1	72792	uc007bux.2	0	ENSMUSG00000026227	2810459M11Rik	RIKEN cDNA 2810459M11 gene	uc007bux.2;uc011wog.1	72792;72792	0;0
chr6	110640649	110665721	25073	*	9.61	9.34	9.84	-0.49	1.51e-07	1.6e-06	627.35	672.94	863	966.24	Promoter (<=1kb)	6	110645598	111497090	851493	1	108073	uc009dds.1	0	ENSMUSG00000056755	Grm7	glutamate receptor, metabotropic 7	uc009dds.1;uc057lrb.1;uc009ddt.1	108073;108073;108073	0;0;0
chr14	93852091	93914620	62530	*	10.94	10.77	11.09	-0.32	1.54e-07	1.63e-06	1762.04	1732.37	2153	2221.47	Promoter (<=1kb)	14	93013700	93888888	875189	2	211712	uc007uum.2	0	ENSMUSG00000055421	Pcdh9	protocadherin 9	uc007uum.2;uc011zpc.2;uc057kth.1;uc007uun.2;uc007uuo.2	211712;211712;211712;211712;211712	0;0;0;0;0
chr18	74439230	74449058	9829	*	8.87	8.54	9.14	-0.6	1.57e-07	1.66e-06	376.01	370.8	534	596.48	Promoter (<=1kb)	18	74442619	74659060	216442	1	17919	uc008fpo.1	0	ENSMUSG00000025885	Myo5b	myosin VB	uc008fpo.1;uc008fpp.1	17919;17919	0;0
chr8	122649896	122687023	37128	*	10.4	10.19	10.58	-0.39	1.61e-07	1.7e-06	1152.69	1185.98	1473	1581.2	Promoter (<=1kb)	8	122625136	122678175	53040	2	12398	uc009ntl.2	0	ENSMUSG00000006362	Cbfa2t3	CBFA2/RUNX1 translocation partner 3	uc009ntl.2;uc009ntm.2;uc009ntn.2	12398;12398;12398	0;0;0
chr9	3944246	3956321	12076	*	7.87	8.22	7.4	0.83	1.63e-07	1.72e-06	312.67	285.46	174	163.47	Distal Intergenic	9	4294793	4309494	14702	2	67618	uc009obe.2	353173	ENSMUSG00000025894	Aasdhppt	aminoadipate-semialdehyde dehydrogenase-phosphopantetheinyl transferase	NA	NA	NA
chr3	18039240	18066748	27509	*	10.04	9.8	10.24	-0.44	1.63e-07	1.72e-06	884.02	903.46	1140	1282.48	Promoter (<=1kb)	3	18054325	18057514	3190	1	59058	uc008orl.2	0	ENSMUSG00000025128	Bhlhe22	basic helix-loop-helix family, member e22	uc008orl.2	59058	0
chr11	78476861	78501423	24563	*	9.7	9.45	9.91	-0.46	1.63e-07	1.72e-06	670.02	728.85	942	987.64	Promoter (<=1kb)	11	78499120	78502325	3206	1	22370	uc007kjk.2	0	ENSMUSG00000017344	Vtn	vitronectin	uc007kjl.2;uc007kjm.2;uc007kjk.2;uc007kjh.2;uc007kji.2;uc007kjj.2;uc007kjg.2	18292;18292;22370;237868;237868;237868;52466	-2076;-2090;0;0;0;0;11160
chr12	73990420	74016894	26475	*	9.65	9.4	9.87	-0.47	1.66e-07	1.76e-06	672.02	677.84	899	966.24	Promoter (<=1kb)	12	73997761	74267916	270156	1	238266	uc007nwu.1	0	ENSMUSG00000044912	Syt16	synaptotagmin XVI	uc007nwu.1;uc007nwv.1	238266;238266	0;0
chr4	130791002	130796794	5793	*	8.13	7.67	8.48	-0.81	1.67e-07	1.76e-06	217.34	189.32	319	394.08	Promoter (<=1kb)	4	130792537	130826318	33782	1	20970	uc008uzr.1	0	ENSMUSG00000025743	Sdc3	syndecan 3	uc008uzr.1	20970	0
chr9	21240908	21252157	11250	*	9.09	8.79	9.34	-0.56	1.67e-07	1.76e-06	448.68	433.58	618	681.13	Promoter (<=1kb)	9	21242917	21248443	5527	2	94226	uc009oks.2	0	ENSMUSG00000045087	S1pr5	sphingosine-1-phosphate receptor 5	uc009oko.2;uc009okp.2;uc009okq.2;uc009okr.2;uc009oks.2	50868;50868;50868;50868;94226	-1576;-1576;-1576;-1576;0
chr15	87538870	87548215	9346	*	8.43	8.03	8.75	-0.71	1.67e-07	1.76e-06	270.67	253.09	391	468.04	Promoter (<=1kb)	15	87544299	87759364	215066	1	106014	uc007xee.1	0	ENSMUSG00000054863	Fam19a5	family with sequence similarity 19, member A5	uc007xee.1	106014	0
chr19	58443264	58462633	19370	*	9.61	9.36	9.82	-0.46	1.68e-07	1.76e-06	651.35	663.13	899	912.72	Promoter (<=1kb)	19	58235581	58454594	219014	2	14585	uc008ial.2	0	ENSMUSG00000025089	Gfra1	glial cell line derived neurotrophic factor family receptor alpha 1	uc008ial.2;uc008iam.2;uc008ian.2	14585;14585;14585	0;0;0
chr14	105435178	105463482	28305	*	9.55	9.77	9.3	0.47	1.68e-07	1.76e-06	879.35	865.2	629	627.62	Exon (uc029smu.1/71362, exon 3 of 3)	14	105427559	105437716	10158	1	71362	uc029smu.1	7619	ENSMUSG00000115548	5430440P10Rik	RIKEN cDNA 5430440P10 gene	uc029smu.1	71362	0
chr12	3105322	3110257	4936	*	12.58	12.82	12.29	0.54	1.69e-07	1.77e-06	7694.84	6814.7	5197	4799.08	Distal Intergenic	12	3235526	3250374	14849	1	74173	uc007mwj.2	-125269	ENSMUSG00000079179	Rab10os	RAB10, member RAS oncogene family, opposite strand	NA	NA	NA
chr4	89683491	89693404	9914	*	8.72	8.37	9	-0.63	1.69e-07	1.77e-06	322.01	341.37	482	542.96	Promoter (<=1kb)	4	89688198	89694766	6569	1	242523	uc008tol.1	0	ENSMUSG00000043753	Dmrta1	doublesex and mab-3 related transcription factor like family A1	uc008tol.1	242523	0
chr7	113198665	113211126	12462	*	8.79	8.43	9.08	-0.65	1.69e-07	1.77e-06	354.01	336.47	490	590.64	Promoter (<=1kb)	7	113207465	113295593	88129	1	11865	uc012fsi.1	0	ENSMUSG00000055116	Arntl	aryl hydrocarbon receptor nuclear translocator-like	uc012fsi.1;uc009jhe.2;uc009jhf.2	11865;11865;11865	0;0;0
chr12	84621725	84659323	37599	*	10.23	10.01	10.42	-0.41	1.69e-07	1.77e-06	1074.02	993.71	1353	1386.59	Promoter (<=1kb)	12	84641019	84651455	10437	1	432677	uc011ypa.1	0	ENSMUSG00000071235	Vrtn	vertebrae development associated	uc007ofp.2;uc007ofo.2;uc011yoz.1;uc011ypa.1;uc011ypb.1;uc007ofq.1	19300;19300;19300;432677;432677;432677	-4312;-4259;-4259;0;0;0
chr2	178337384	178419902	82519	*	11.34	11.19	11.48	-0.29	1.69e-07	1.77e-06	2314.72	2348.41	2782	2924.01	Promoter (<=1kb)	2	178411206	178414463	3258	2	228966	uc008ohp.2	0	ENSMUSG00000049999	Ppp1r3d	protein phosphatase 1, regulatory subunit 3D	uc008ohp.2;uc012clt.2;uc008ohn.2;uc008oho.1;uc008ohq.2;uc008ohj.2;uc012cls.1;uc008ohk.2;uc008ohl.2;uc008ohm.2	228966;320558;320558;320558;71532;74189;74189;74189;74189;74189	0;0;0;0;0;0;0;0;0;0
chr15	85728524	85744230	15707	*	9.01	8.7	9.26	-0.56	1.71e-07	1.78e-06	418.68	414.94	597	631.51	Promoter (<=1kb)	15	85735564	85806851	71288	1	19013	uc007xdj.2	0	ENSMUSG00000022383	Ppara	peroxisome proliferator activated receptor alpha	uc007xdj.2;uc007xdk.2	19013;19013	0;0
chr4	101714209	101723974	9766	*	8.67	8.32	8.94	-0.62	1.73e-07	1.8e-06	316.67	323.72	499	484.58	Promoter (<=1kb)	4	101717407	101792258	74852	1	16847	uc008tvw.2	0	ENSMUSG00000057722	Lepr	leptin receptor	uc008tvw.2;uc008tvx.2;uc008tvy.2;uc008tvz.2;uc008twa.1	16847;16847;16847;16847;16847	0;0;0;0;-4036
chr3	130058969	130072652	13684	*	8.78	8.45	9.05	-0.6	1.73e-07	1.8e-06	354.01	346.28	517	544.91	Promoter (<=1kb)	3	129983185	130060907	77723	2	99683	uc008rit.1	0	ENSMUSG00000001052	Sec24b	Sec24 related gene family, member B (S. cerevisiae)	uc008rit.1	99683	0
chr11	11659136	11727751	68616	*	11.03	10.87	11.18	-0.31	1.74e-07	1.81e-06	1881.38	1858.91	2285	2365.48	Promoter (<=1kb)	11	11685925	11761424	75500	1	22778	uc007iaj.2	0	ENSMUSG00000018654	Ikzf1	IKAROS family zinc finger 1	uc007iaj.2;uc007iak.2;uc007ial.2;uc007iam.2;uc007ian.1;uc007iao.1;uc007iap.1;uc007iaq.1;uc011xrn.1	22778;22778;22778;22778;22778;22778;22778;22778;22778	0;0;0;0;0;0;0;0;0
chr5	30580375	30592451	12077	*	8.43	8.05	8.73	-0.68	1.76e-07	1.83e-06	250.67	278.59	409	438.84	Promoter (<=1kb)	5	30573987	30588619	14633	2	100502829	uc008wvq.2	0	ENSMUSG00000053214	Gm9899	predicted gene 9899	uc008wvq.2;uc008wvr.1	100502829;16527	0;0
chr1	156292221	156325416	33196	*	10.12	9.9	10.31	-0.4	1.78e-07	1.85e-06	967.36	949.56	1252	1281.51	Promoter (<=1kb)	1	156310719	156328035	17317	1	170484	uc007dch.2	0	ENSMUSG00000026602	Nphs2	nephrosis 2, podocin	uc007dch.2;uc007dcf.3;uc029qui.1;uc029quj.1	170484;214575;214575;214575	0;0;0;0
chr13	61169214	61190182	20969	*	9.06	9.31	8.76	0.55	1.78e-07	1.85e-06	652.02	618.98	445	420.36	Distal Intergenic	13	61159215	61164188	4974	2	56835	uc007qwe.1	-5026	ENSMUSG00000055679	Ctsr	cathepsin R	uc007qwf.1	58518	0
chr1	182161140	182226127	64988	*	10.56	10.73	10.37	0.36	1.8e-07	1.87e-06	1736.04	1660.76	1331	1315.56	Distal Intergenic	1	182157178	182158098	921	2	625823	uc011wxu.1	-3042	ENSMUSG00000091013	Vmn1r1	vomeronasal 1 receptor 1	uc011wxu.1	625823	-3042
chr2	167276805	167295824	19020	*	8.39	8.7	8.01	0.69	1.82e-07	1.89e-06	434.68	394.34	259	254.94	Downstream (2-3kb)	2	167203196	167240537	37342	2	19223	uc008nzl.1	-36268	ENSMUSG00000017969	Ptgis	prostaglandin I2 (prostacyclin) synthase	uc008nzm.2	56336	0
chr5	96365549	96380308	14760	*	9.07	8.76	9.33	-0.57	1.84e-07	1.91e-06	456.68	408.08	617	670.43	Promoter (<=1kb)	5	96373955	96545147	171193	1	231470	uc008yfj.1	0	ENSMUSG00000034687	Fras1	Fraser extracellular matrix complex subunit 1	uc008yfj.1;uc008yfk.1	231470;231470	0;0
chr19	25498145	25509509	11365	*	8.94	8.62	9.19	-0.57	1.85e-07	1.91e-06	392.01	395.33	563	609.13	Promoter (<=1kb)	19	25505706	25560265	54560	1	50796	uc008hbi.1	0	ENSMUSG00000024837	Dmrt1	doublesex and mab-3 related transcription factor 1	uc008hbi.1;uc012bju.1;uc012bjv.1	50796;50796;50796	0;0;0
chr2	35975731	36012632	36902	*	10.1	9.88	10.29	-0.41	1.86e-07	1.92e-06	954.69	927	1219	1280.53	Promoter (<=1kb)	2	35751226	35979624	228399	2	74410	uc008jkz.3	0	ENSMUSG00000026885	Ttll11	tubulin tyrosine ligase-like family, member 11	uc008jkz.3	74410	0
chr19	53667191	53685395	18205	*	9.45	9.18	9.67	-0.49	1.87e-07	1.93e-06	564.01	598.38	822	807.63	Promoter (<=1kb)	19	53677306	53867080	189775	1	73713	uc008hwz.2	0	ENSMUSG00000043639	Rbm20	RNA binding motif protein 20	uc008hwz.2	73713	0
chr9	119874951	119881542	6592	*	7.49	7.89	6.94	0.95	1.89e-07	1.95e-06	230.01	243.28	132	112.87	Distal Intergenic	9	119894895	119921966	27072	1	67561	uc009sbm.1	-13353	ENSMUSG00000032512	Wdr48	WD repeat domain 48	NA	NA	NA
chr2	144323058	144337498	14441	*	9.13	8.84	9.37	-0.54	1.89e-07	1.95e-06	462.68	452.22	652	674.32	Promoter (<=1kb)	2	144305175	144331362	26188	2	107586	uc008mqv.2	0	ENSMUSG00000037279	Ovol2	ovo like zinc finger 2	uc008mqv.2;uc008mqw.2;uc008mqx.2	107586;107586;107586	0;0;0
chr4	133232730	133256750	24021	*	9.49	9.23	9.71	-0.48	1.9e-07	1.95e-06	608.68	592.5	831	844.61	Promoter (<=1kb)	4	133253090	133256687	3598	2	269589	uc008vcm.2	0	ENSMUSG00000028860	Sytl1	synaptotagmin-like 1	uc008vcm.2;uc012dmk.1;uc008vco.2;uc008vck.1;uc008vcl.1	269589;269589;269589;53608;53608	0;0;0;0;0
chr13	94589468	94618956	29489	*	9.89	9.65	10.09	-0.44	1.9e-07	1.95e-06	807.35	803.4	1045	1140.41	Distal Intergenic	13	94788943	94842899	53957	1	21371	uc007rlx.1	-169987	ENSMUSG00000042043	Tbca	tubulin cofactor A	NA	NA	NA
chr2	172532456	172573565	41110	*	10.36	10.15	10.54	-0.39	1.93e-07	1.98e-06	1116.69	1153.6	1429	1544.23	Promoter (<=1kb)	2	172549593	172558622	9030	1	21420	uc008ocz.3	0	ENSMUSG00000028640	Tfap2c	transcription factor AP-2, gamma	uc008ocz.3;uc008oda.3	21420;21420	0;0
chr5	88878074	88897302	19229	*	9.43	9.14	9.67	-0.53	1.96e-07	2.01e-06	593.35	535.6	765	866.01	Promoter (<=1kb)	5	88887260	89239656	352397	1	54403	uc008yaj.2	0	ENSMUSG00000060961	Slc4a4	solute carrier family 4 (anion exchanger), member 4	uc008yaj.2;uc008yak.1;uc012dyc.1	54403;54403;54403	0;0;0
chr1	9781479	9824501	43023	*	10.46	10.26	10.64	-0.38	1.97e-07	2.02e-06	1229.36	1216.38	1527	1655.16	Promoter (<=1kb)	1	9798130	9902570	104441	1	170755	uc007agu.2	0	ENSMUSG00000025915	Sgk3	serum/glucocorticoid regulated kinase 3	uc007agu.2;uc007agv.2;uc007agw.2;uc011wid.2;uc029qmv.1	170755;170755;170755;170755;73331	0;0;0;0;0
chr5	36861824	36875187	13364	*	9.11	8.81	9.35	-0.55	1.99e-07	2.04e-06	440.68	455.16	625	684.05	Promoter (<=1kb)	5	36868570	36955078	86509	1	269643	uc008xfe.1	0	ENSMUSG00000029120	Ppp2r2c	protein phosphatase 2, regulatory subunit B, gamma	uc008xfe.1;uc029vhf.1	269643;71054	0;0
chr4	134246688	134255930	9243	*	8.62	8.26	8.9	-0.64	2.02e-07	2.06e-06	321.34	293.31	467	491.39	Promoter (<=1kb)	4	134251110	134254106	2997	2	72690	uc008veo.1	0	ENSMUSG00000050105	Grrp1	glycine/arginine rich protein 1	uc008vej.1;uc008vek.1;uc008veo.1;uc008vem.1;uc008ven.1;uc008vel.2;uc029uzv.1	68040;68040;72690;77490;77490;77490;77490	-1097;-1097;0;2925;2925;2925;2925
chr10	116464837	116477549	12713	*	9.09	8.77	9.35	-0.58	2.03e-07	2.08e-06	443.34	430.64	600	704.49	Promoter (<=1kb)	10	116473163	116474987	1825	1	100504412	uc007hbz.3	0	ENSMUSG00000085837	Kcnmb4os2	potassium large conductance calcium-activated channel, subfamily M, beta member 4, opposite strand 2	uc007hbz.3;uc007hbw.1;uc007hby.1	100504412;58802;58802	0;0;0
chr5	25089875	25103636	13762	*	8.97	8.62	9.25	-0.63	2.07e-07	2.11e-06	436.68	351.18	605	610.1	Promoter (<=1kb)	5	24862735	25100642	237908	2	108099	uc008wsm.2	0	ENSMUSG00000028944	Prkag2	protein kinase, AMP-activated, gamma 2 non-catalytic subunit	uc008wsm.2;uc008wsq.2	108099;67261	0;0
chr15	79157846	79172731	14886	*	8.9	8.56	9.18	-0.62	2.07e-07	2.11e-06	402.01	354.12	543	615.94	Promoter (<=1kb)	15	79166066	79216401	50336	1	100041655	uc011zvz.1	0	ENSMUSG00000075555	Gm10863	predicted gene 10863	uc011zvz.1;uc057kuh.1;uc007wsu.2;uc007wsw.1	100041655;100041655;20665;20665	0;0;0;0
chr14	121026748	121044570	17823	*	9.35	9.07	9.58	-0.51	2.1e-07	2.14e-06	560.68	517.94	759	776.49	Promoter (<=1kb)	14	121035574	121283726	248153	1	223254	uc007vaa.1	0	ENSMUSG00000025555	Farp1	FERM, RhoGEF (Arhgef) and pleckstrin domain protein 1 (chondrocyte-derived)	uc007vaa.1	223254	0
chr4	4130843	4144220	13378	*	9.05	8.75	9.3	-0.56	2.11e-07	2.15e-06	411.34	447.32	606	658.75	Promoter (<=1kb)	4	4133536	4138445	4910	2	18619	uc008rwz.1	0	ENSMUSG00000045573	Penk	preproenkephalin	uc008rwz.1;uc008rxa.1;uc012dah.1	18619;18619;18619	0;0;0
chr2	91249961	91260666	10706	*	8.61	8.24	8.9	-0.66	2.14e-07	2.18e-06	310.67	294.29	441	515.72	Promoter (<=1kb)	2	91256165	91264680	8516	1	80708	uc008kvm.2	0	ENSMUSG00000027257	Pacsin3	protein kinase C and casein kinase substrate in neurons 3	uc008kvq.2;uc008kvr.2;uc008kvm.2;uc008kvn.3;uc008kvo.3;uc008kvp.3	77038;77038;80708;80708;80708;80708	-4449;-4449;0;0;0;0
chr4	32232223	32248203	15981	*	9.16	8.85	9.42	-0.56	2.14e-07	2.18e-06	497.34	426.72	672	694.76	Promoter (<=1kb)	4	32238950	32563367	324418	1	12014	uc012dbf.1	0	ENSMUSG00000040270	Bach2	BTB and CNC homology, basic leucine zipper transcription factor 2	uc012dbf.1	12014	0
chr3	148972930	149002902	29973	*	9.72	9.48	9.93	-0.45	2.16e-07	2.2e-06	700.68	731.79	991	961.37	Promoter (<=1kb)	3	148888941	148989480	100540	2	99633	uc008rsc.1	0	ENSMUSG00000028184	Adgrl2	adhesion G protein-coupled receptor L2	uc008rsc.1	99633	0
chr14	64933207	64947383	14177	*	8.38	8.68	8	0.68	2.25e-07	2.28e-06	409.34	410.04	258	253.97	Promoter (2-3kb)	14	64811601	64949847	138247	2	219150	uc007uiq.1	2464	ENSMUSG00000021972	Hmbox1	homeobox containing 1	uc007uiu.1;uc007uiv.1;uc007uiw.2;uc029skx.1;uc007uiq.1;uc007uir.1;uc007uis.1;uc007uit.1	210925;210925;210925;210925;219150;219150;219150;219150	-2662;-2662;-2662;-2662;0;0;0;0
chr9	19757137	19774208	17072	*	8.61	8.9	8.25	0.65	2.25e-07	2.28e-06	498.68	459.09	285	325	Distal Intergenic	9	19780283	19784064	3782	1	18358	uc009ohu.1	-6075	ENSMUSG00000058659	Olfr58	olfactory receptor 58	NA	NA	NA
chr8	105338079	105527581	189503	*	12.7	12.61	12.79	-0.18	2.26e-07	2.29e-06	6258.14	6249.67	6988	7172.34	Promoter (<=1kb)	8	105374904	105382862	7959	1	102075	uc009ncv.1	0	ENSMUSG00000014782	Plekhg4	pleckstrin homology domain containing, family G (with RhoGef domain) member 4	uc009ncv.1;uc009ncw.1;uc009ncx.1;uc009ndg.1;uc009nde.1;uc009ndf.1;uc009nct.2;uc012gjj.1;uc009nda.2;uc012gjk.1;uc009ndb.2;uc009ncu.1;uc009ncy.2;uc009ncz.2;uc009ndc.2;uc012gjl.1;uc009ndd.1	102075;102075;102075;11972;15484;15484;234686;270091;270091;270091;270091;277973;279499;279499;67971;70796;70796	0;0;0;0;0;0;0;0;0;0;0;0;0;0;0;0;0
chr3	94670920	94682122	11203	*	8.17	8.48	7.75	0.73	2.26e-07	2.29e-06	364.01	352.16	213	218.94	Distal Intergenic	3	94660589	94667152	6564	2	545551	uc008qgw.1	-3768	NA	BC021767	cingulin pseudogene	uc008qgw.1	545551	-3768
chr18	44896374	44916569	20196	*	8.9	9.16	8.58	0.57	2.29e-07	2.32e-06	572.68	569.94	393	374.62	Distal Intergenic	18	44854992	44889720	34729	1	240255	uc008evc.2	41382	ENSMUSG00000034653	Ythdc2	YTH domain containing 2	NA	NA	NA
chr11	89282360	89313445	31086	*	10.01	9.76	10.21	-0.45	2.3e-07	2.33e-06	865.35	873.05	1102	1271.77	Promoter (<=1kb)	11	89300638	89302559	1922	2	18121	uc007kwh.2	0	ENSMUSG00000048616	Nog	noggin	uc007kwh.2	18121	0
chrX	158039905	158046009	6105	*	7.55	7.02	7.94	-0.92	2.3e-07	2.33e-06	127.34	132.43	225	265.64	Promoter (<=1kb)	20	157821573	158043197	221625	2	245684	uc009ush.2	0	ENSMUSG00000025658	Cnksr2	connector enhancer of kinase suppressor of Ras 2	uc009ush.2;uc009usi.2	245684;245684	0;0
chr8	29201128	29256972	55845	*	11.13	10.97	11.28	-0.31	2.32e-07	2.33e-06	1998.05	2016.84	2419	2542.58	Promoter (<=1kb)	8	28646717	29219636	572920	2	210801	uc009liz.2	0	ENSMUSG00000063626	Unc5d	unc-5 netrin receptor D	uc009liz.2;uc009lja.2;uc012gbu.1;uc012gbv.1;uc012gbw.1	210801;210801;210801;210801;210801	0;0;0;0;0
chr8	70783010	70909833	126824	*	12.1	11.98	12.2	-0.22	2.33e-07	2.34e-06	3965.42	4115.11	4734	4694.96	Promoter (<=1kb)	8	70895508	70895570	63	2	102465984	uc033jga.1	0	ENSMUSG00000098710	Mir7067	microRNA 7067	uc033jga.1;uc033jfz.1;uc009mcc.1;uc009mbz.2;uc009mbr.3;uc009mby.1;uc009mcd.2;uc012gfl.1;uc012gfm.1;uc012gfh.1;uc009mbp.2;uc009mbq.1;uc009mbs.1;uc009mbt.1;uc009mca.2;uc009mcb.2;uc012gfj.1;uc009mbv.2;uc009mbw.2;uc009mbx.2;uc012gfk.1	102465984;102466823;104370;114479;16161;234388;270058;270058;270058;546071;546071;546071;70807;70807;76808;76808;84036;84036;84036;84036;84036	0;0;0;0;0;0;0;0;0;0;0;0;0;0;0;0;0;0;0;0;0
chr5	98240816	98280262	39447	*	10.29	10.07	10.48	-0.4	2.33e-07	2.35e-06	1088.03	1064.34	1350	1499.47	Promoter (<=1kb)	5	98254184	98277033	22850	1	14176	uc008ygc.2	0	ENSMUSG00000029337	Fgf5	fibroblast growth factor 5	uc008ygc.2;uc008ygd.2	14176;14176	0;0
chr17	45528888	45557154	28267	*	9.87	9.64	10.07	-0.44	2.34e-07	2.36e-06	800.69	789.67	1113	1037.27	Promoter (<=1kb)	17	45555700	45563169	7470	1	18037	uc008cqv.3	0	ENSMUSG00000023947	Nfkbie	nuclear factor of kappa light polypeptide gene enhancer in B cells inhibitor, epsilon	uc008cqv.3;uc056zew.2;uc008cqu.2;uc008cqt.2	18037;18037;210573;21645	0;0;0;0
chr17	55430173	55457543	27371	*	9.79	9.55	9.99	-0.44	2.34e-07	2.36e-06	770.02	727.87	1012	1023.65	Promoter (<=1kb)	17	55445717	55483032	37316	1	240119	uc008czz.1	0	ENSMUSG00000024172	St6gal2	beta galactoside alpha 2,6 sialyltransferase 2	uc008czz.1;uc008daa.1	240119;240119	0;0
chr15	100719674	100732949	13276	*	8.85	8.53	9.12	-0.6	2.36e-07	2.37e-06	377.34	360.01	527	587.72	Promoter (<=1kb)	15	100689915	100720477	30563	2	207839	uc007xrz.2	0	ENSMUSG00000037280	Galnt6	polypeptide N-acetylgalactosaminyltransferase 6	uc007xrz.2;uc007xsa.2;uc007xsb.2;uc007xsd.2;uc029svd.1	207839;207839;207839;619313;619313	0;0;0;0;0
chr17	28138593	28148387	9795	*	8.44	8.07	8.74	-0.67	2.39e-07	2.39e-06	256.01	281.53	412	441.76	Promoter (<=1kb)	17	28142526	28171345	28820	1	268935	uc008bqd.1	0	ENSMUSG00000038677	Scube3	signal peptide, CUB domain, EGF-like 3	uc008bqd.1	268935	0
chr4	153473441	153484417	10977	*	8.47	8.1	8.77	-0.68	2.39e-07	2.39e-06	249.34	298.21	432	442.74	Promoter (<=1kb)	4	153373221	153482830	109610	2	230959	uc008was.1	0	ENSMUSG00000039546	Ajap1	adherens junction associated protein 1	uc008was.1	230959	0
chr1	131222141	131275354	53214	*	10.53	10.33	10.7	-0.36	2.39e-07	2.39e-06	1295.36	1287.01	1613	1706.73	Promoter (<=1kb)	1	131176410	131245178	68769	2	54354	uc007cnd.1	0	ENSMUSG00000026430	Rassf5	Ras association (RalGDS/AF-6) domain family member 5	uc007cnd.1;uc011wro.1;uc007cne.1;uc007cnf.1	54354;54354;56489;56489	0;0;0;0
chr9	26940467	26958790	18324	*	8.87	9.14	8.54	0.6	2.39e-07	2.39e-06	568.01	562.09	402	342.51	Distal Intergenic	9	26879567	26923081	43515	2	382064	uc033jjr.1	-17386	ENSMUSG00000079644	Gm1110	predicted gene 1110	NA	NA	NA
chr6	83750927	83764429	13503	*	9.07	8.76	9.32	-0.57	2.39e-07	2.39e-06	439.34	424.75	597	684.05	Promoter (<=1kb)	6	83761759	83762508	750	2	67934	uc033isu.1	0	ENSMUSG00000099354	1700124L16Rik	RIKEN cDNA 1700124L16 gene	uc009coc.1;uc033isu.1;uc009cod.1	110935;67934;75305	0;0;0
chr7	81211197	81218762	7566	*	8.39	8.01	8.7	-0.69	2.4e-07	2.4e-06	268.67	246.22	395	435.93	Promoter (<=1kb)	7	81213804	81333622	119819	1	18584	uc009ibt.1	0	ENSMUSG00000025584	Pde8a	phosphodiesterase 8A	uc009ibt.1	18584	0
chr19	39642439	39657139	14701	*	8.41	8.71	8.03	0.68	2.41e-07	2.41e-06	434.68	401.21	255	267.59	Promoter (<=1kb)	19	39608858	39649042	40185	2	545288	uc008hkc.2	0	ENSMUSG00000062624	Cyp2c67	cytochrome P450, family 2, subfamily c, polypeptide 67	uc008hkc.2	545288	0
chr8	71496786	71545848	49063	*	11	10.83	11.15	-0.32	2.42e-07	2.41e-06	1812.04	1836.35	2214	2331.42	Promoter (<=1kb)	8	71534259	71537437	3179	2	69550	uc009mdr.2	0	ENSMUSG00000046718	Bst2	bone marrow stromal cell antigen 2	uc009mdr.2;uc009mdn.1;uc009mdo.1;uc009mds.1;uc009mdt.1;uc009mdp.2	69550;70359;70359;73711;73711;84094	0;8683;0;0;0;0
chr17	56138884	56164962	26079	*	9.54	9.28	9.77	-0.49	2.42e-07	2.41e-06	595.35	648.41	833	910.77	Promoter (<=1kb)	17	56123085	56140343	17259	2	20359	uc008dbe.1	0	ENSMUSG00000001227	Sema6b	sema domain, transmembrane domain (TM), and cytoplasmic domain, (semaphorin) 6B	uc008dbe.1;uc008dbf.2	20359;66443	0;0
chr7	109162969	109194219	31251	*	10.11	9.89	10.3	-0.41	2.42e-07	2.41e-06	919.35	977.03	1220	1299.99	Promoter (<=1kb)	7	109138565	109170512	31948	2	109594	uc057aiy.1	0	ENSMUSG00000036111	Lmo1	LIM domain only 1	uc057aiy.1;uc009jdk.2;uc057aiz.1	109594;109594;109594	0;0;0
chr14	65251537	65267136	15600	*	9.22	8.91	9.48	-0.57	2.46e-07	2.45e-06	428.01	533.64	704	725.89	Promoter (<=1kb)	14	65192441	65262463	70023	2	14365	uc007ujb.2	0	ENSMUSG00000007989	Fzd3	frizzled class receptor 3	uc007ujb.2;uc007ujc.1;uc007ujd.1;uc007uje.1;uc011znm.1	14365;50759;50759;50759;50759	0;0;0;0;0
chr10	122666378	122687084	20707	*	9.51	9.25	9.73	-0.47	2.5e-07	2.48e-06	616.01	603.29	830	864.07	Promoter (<=1kb)	10	122679315	122679415	101	1	102466884	uc033fsv.1	0	ENSMUSG00000099225	Mir8104	microRNA 8104	uc033fsv.1;uc007hgf.2;uc007hgg.2;uc007hgh.3	102466884;319468;319468;319468	0;0;0;0
chr2	168261807	168292823	31017	*	9.82	9.56	10.03	-0.47	2.52e-07	2.5e-06	802.69	709.23	1010	1084.95	Promoter (<=1kb)	2	168261698	168269331	7634	2	241794	uc008oat.1	0	ENSMUSG00000074575	Kcng1	potassium voltage-gated channel, subfamily G, member 1	uc008oat.1	241794	0
chr8	45929992	46345213	415222	*	13.9	13.83	13.96	-0.13	2.52e-07	2.5e-06	14619	14458.3	15790	16116.6	Promoter (<=1kb)	8	46033261	46116702	83442	2	102141	uc009lpu.2	0	ENSMUSG00000038291	Snx25	sorting nexin 25	uc009lpu.2;uc012gdj.1;uc009lpz.3;uc009lqa.1;uc009lpp.3;uc009lpq.3;uc009lpm.1;uc009lqc.2;uc009lqd.2;uc009lpr.1;uc009lpv.1;uc009lpw.1;uc009lpx.1;uc009lpy.1;uc009lps.1;uc009lpt.1;uc012gdi.1;uc009lpn.1;uc009lpo.1	102141;102141;11739;11739;192169;192169;212392;234219;234219;654824;66756;66756;66756;66756;67620;67620;67620;69479;69479	0;0;0;0;0;0;0;0;0;0;0;0;0;0;0;0;0;0;0
chr15	91043478	91079859	36382	*	10.42	10.2	10.6	-0.4	2.53e-07	2.5e-06	1222.69	1137.91	1485	1622.07	Promoter (<=1kb)	15	90933275	91049951	116677	2	16564	uc007xhs.3	0	ENSMUSG00000022629	Kif21a	kinesin family member 21A	uc007xhs.3;uc007xht.3;uc007xhu.3;uc007xhv.3	16564;16564;16564;16564	0;0;0;0
chr4	139084548	139095421	10874	*	8.81	8.48	9.07	-0.59	2.54e-07	2.51e-06	342.67	372.76	534	541.02	Promoter (<=1kb)	4	139082292	139092970	10679	2	17965	uc008vls.1	0	ENSMUSG00000041120	Nbl1	neuroblastoma, suppression of tumorigenicity 1	uc008vls.1	17965	0
chr1	173354711	173383243	28533	*	9.9	9.65	10.12	-0.47	2.59e-07	2.56e-06	798.69	807.33	1021	1202.69	Promoter (<=1kb)	1	173334254	173367695	33442	2	94332	uc007dri.1	0	ENSMUSG00000005338	Cadm3	cell adhesion molecule 3	uc007dri.1;uc007drj.1;uc007drk.1	94332;94332;94332	0;0;0
chr5	99031555	99043362	11808	*	8.77	8.44	9.05	-0.61	2.59e-07	2.56e-06	343.34	350.2	495	563.4	Promoter (<=1kb)	5	98929773	99037079	107307	2	19092	uc008ygj.2	0	ENSMUSG00000029334	Prkg2	protein kinase, cGMP-dependent, type II	uc008ygj.2	19092	0
chr2	181210227	181218391	8165	*	8.36	7.99	8.66	-0.67	2.61e-07	2.57e-06	254.01	254.07	402	407.71	Promoter (<=1kb)	2	181205563	181213171	7609	2	20811	uc008oll.1	0	ENSMUSG00000027579	Srms	src-related kinase lacking C-terminal regulatory tyrosine and N-terminal myristylation sites	uc008oll.1;uc008olm.1	20811;332713	0;-1625
chr13	10356748	10368945	12198	*	8.97	8.66	9.23	-0.57	2.61e-07	2.57e-06	402.01	407.1	567	633.45	Promoter (<=1kb)	13	9876613	10360803	484191	2	12671	uc007plb.1	0	ENSMUSG00000046159	Chrm3	cholinergic receptor, muscarinic 3, cardiac	uc007plb.1	12671	0
chr4	120279046	120287169	8124	*	8.24	7.83	8.56	-0.73	2.62e-07	2.58e-06	242.67	213.85	364	391.17	Promoter (<=1kb)	4	120267078	120287261	20184	2	329934	uc008unc.1	92	ENSMUSG00000052135	Foxo6	forkhead box O6	uc008unc.1	329934	0
chr15	55900659	55922648	21990	*	9.58	9.33	9.8	-0.47	2.63e-07	2.58e-06	652.68	631.74	854	931.21	Promoter (<=1kb)	15	55639154	55906949	267796	2	20649	uc007vsk.1	0	ENSMUSG00000060429	Sntb1	syntrophin, basic 1	uc007vsk.1	20649	0
chr15	60811293	60849126	37834	*	10.17	9.96	10.35	-0.4	2.65e-07	2.6e-06	1010.02	978.01	1284	1330.16	Promoter (<=1kb)	15	60822965	60831400	8436	1	320469	uc011zte.1	0	NA	9930014A18Rik	RIKEN cDNA 9930014A18 gene	uc011zte.1;uc011ztf.1;uc007vya.2	320469;320469;399603	0;0;0
chr17	48089686	48103817	14132	*	9.16	8.87	9.4	-0.53	2.67e-07	2.62e-06	471.34	463.01	649	701.57	Promoter (<=1kb)	17	48064789	48090378	25590	2	320638	uc008cwq.1	0	ENSMUSG00000117334	A730006G06Rik	RIKEN cDNA A730006G06 gene	uc008cwq.1;uc008cwr.1;uc008cws.1	320638;68224;68224	0;0;0
chr6	133488408	133525666	37259	*	9.98	10.17	9.76	0.41	2.68e-07	2.63e-06	1144.03	1167.34	876	860.17	Distal Intergenic	6	133529189	133532762	3574	1	545884	uc012euh.1	-3523	ENSMUSG00000095412	Gm5885	predicted gene 5885	uc012euh.1	545884	-3523
chr13	81071185	81092998	21814	*	8.84	9.11	8.52	0.59	2.69e-07	2.64e-06	534.68	568.95	367	367.81	Exon (uc011zce.1/319983, exon 2 of 2)	13	80964074	81079857	115784	1	319983	uc011zce.1	107111	ENSMUSG00000097098	9330111N05Rik	RIKEN cDNA 9330111N05 gene	uc011zcf.1;uc007rhn.1;uc011zce.1;uc007rhl.2;uc057kql.1	110789;110789;319983;319983;319983	351580;0;0;0;0
chr9	79706580	79731173	24594	*	9.73	9.47	9.94	-0.47	2.71e-07	2.65e-06	707.35	711.19	917	1053.81	Promoter (<=1kb)	9	79598987	79718722	119736	2	12816	uc009qus.2	0	ENSMUSG00000032332	Col12a1	collagen, type XII, alpha 1	uc009qus.2;uc009quu.2	12816;12816	0;0
chr2	35572065	35592304	20240	*	9.29	9.02	9.52	-0.5	2.74e-07	2.68e-06	509.35	529.72	721	751.19	Promoter (<=1kb)	2	35582840	35730994	148155	1	69601	uc056zmf.1	0	ENSMUSG00000026883	Dab2ip	disabled 2 interacting protein	uc008jkx.2;uc056zmf.1	69601;69601	0;0
chr15	99569476	99602780	33305	*	10.06	9.83	10.26	-0.43	2.78e-07	2.72e-06	931.35	891.69	1161	1292.21	Promoter (<=1kb)	15	99579056	99584545	5490	1	11827	uc007xps.2	0	ENSMUSG00000023013	Aqp2	aquaporin 2	uc007xps.2;uc007xpt.1;uc007xpu.1;uc007xpv.1;uc007xpw.1	11827;11830;11830;11831;11831	0;0;0;0;0
chr4	137270209	137287738	17530	*	9.18	8.88	9.43	-0.55	2.78e-07	2.72e-06	438.68	504.21	661	717.14	Promoter (<=1kb)	4	137277635	137299501	21867	1	22417	uc008viv.2	0	ENSMUSG00000036856	Wnt4	wingless-type MMTV integration site family, member 4	uc008viv.2	22417	0
chr6	117996343	118026295	29953	*	9.8	9.56	10.01	-0.46	2.79e-07	2.72e-06	747.35	761.22	973	1095.65	Promoter (<=1kb)	6	118011537	118091546	80010	1	70727	uc009dlj.2	0	ENSMUSG00000030134	Rasgef1a	RasGEF domain family, member 1A	uc009dlj.2	70727	0
chr5	129650023	129662997	12975	*	8.33	8.64	7.94	0.7	2.8e-07	2.73e-06	422.68	375.71	256	234.5	5' UTR	5	129654595	129670088	15494	2	22648	uc008zta.1	7091	ENSMUSG00000051034	Zfp11	zinc finger protein 11	uc008zta.1	22648	0
chr16	97607953	97615703	7751	*	8.3	7.9	8.61	-0.71	2.8e-07	2.73e-06	222.01	256.03	372	408.68	Promoter (<=1kb)	16	97564682	97611195	46514	2	50528	uc008adl.1	0	ENSMUSG00000000385	Tmprss2	transmembrane protease, serine 2	uc008adl.1;uc008adm.1	50528;50528	0;0
chr11	75958406	75968684	10279	*	8.27	7.88	8.57	-0.7	2.81e-07	2.73e-06	235.34	235.43	371	391.17	Distal Intergenic	11	75999912	76003569	3658	1	74230	uc007key.2	-31228	ENSMUSG00000053783	1700016K19Rik	RIKEN cDNA 1700016K19 gene	NA	NA	NA
chr4	63206568	63221547	14980	*	9.12	8.81	9.38	-0.56	2.81e-07	2.73e-06	472.01	428.68	625	706.43	Promoter (<=1kb)	4	63215412	63275020	59609	1	373864	uc008tfr.1	0	ENSMUSG00000045672	Col27a1	collagen, type XXVII, alpha 1	uc008tfr.1;uc008tfs.2	373864;373864	0;0
chr9	121328479	121331522	3044	*	6.58	7.11	5.74	1.37	2.81e-07	2.73e-06	160	115.75	57	49.63	Intron (uc009sda.1/67095, intron 1 of 11)	9	121297534	121452162	154629	1	67095	uc009sda.1	30945	ENSMUSG00000032536	Trak1	trafficking protein, kinesin binding 1	uc009sda.1;uc009sdb.1;uc009sdc.2;uc009sdd.2	67095;67095;67095;67095	0;0;0;0
chr13	116699046	116719843	20798	*	9.54	9.28	9.76	-0.48	2.87e-07	2.79e-06	610.68	633.7	823	916.61	Distal Intergenic	13	116854824	116879334	24511	2	52552	uc007ryh.1	159491	ENSMUSG00000021725	Parp8	poly (ADP-ribose) polymerase family, member 8	NA	NA	NA
chr3	87746852	87771843	24992	*	9.48	9.21	9.7	-0.49	2.89e-07	2.8e-06	599.35	582.69	787	878.66	Promoter (<=1kb)	3	87749097	87754210	5114	2	73182	uc012crj.1	0	ENSMUSG00000028073	Pear1	platelet endothelial aggregation receptor 1	uc012crj.1;uc008psq.1;uc008psr.1;uc008pss.1;uc008pst.1;uc008psu.2;uc012crk.1;uc008psv.1;uc008psp.2	73182;73182;73182;73182;73182;73182;73182;73182;74485	0;0;0;0;0;0;0;0;0
chr10	19917599	19940033	22435	*	9.5	9.23	9.74	-0.51	2.93e-07	2.84e-06	608.01	592.5	790	914.67	Promoter (<=1kb)	10	19934526	20142750	208225	1	26408	uc007enm.2	0	ENSMUSG00000071369	Map3k5	mitogen-activated protein kinase kinase kinase 5	uc007enm.2;uc011xaz.1	26408;26408	0;0
chr6	142412976	142416509	3534	*	7.5	6.95	7.9	-0.95	2.94e-07	2.85e-06	123.34	123.6	211	265.64	Promoter (<=1kb)	6	142413431	142419740	6310	1	319552	uc033ivv.1	0	ENSMUSG00000071112	Spx	spexin hormone	uc033ivv.1;uc009eph.2	319552;319552	0;0
chr2	139663369	139695900	32532	*	10.14	9.93	10.32	-0.39	2.94e-07	2.85e-06	984.02	963.3	1261	1298.05	Promoter (<=1kb)	2	139678178	139758581	80404	1	319909	uc008mpf.2	0	ENSMUSG00000074766	Ism1	isthmin 1, angiogenesis inhibitor	uc008mpf.2	319909	0
chr11	69787711	69810083	22373	*	9.48	9.22	9.69	-0.47	2.98e-07	2.88e-06	589.35	604.27	819	836.82	Promoter (<=1kb)	11	69784036	69795937	11902	2	11443	uc007jrq.2	0	ENSMUSG00000041189	Chrnb1	cholinergic receptor, nicotinic, beta polypeptide 1 (muscle)	uc007jrq.2;uc007jrr.2;uc011xxa.2;uc007jrs.2;uc007jrt.2;uc007jrm.2;uc007jrn.2	11443;14166;14166;380705;74341;75580;75580	0;0;0;0;0;21799;21799
chr1	36553743	36565390	11648	*	8.61	8.24	8.91	-0.68	3.01e-07	2.91e-06	294.67	308.02	428	537.12	Promoter (<=1kb)	1	36548639	36557557	8919	2	20353	uc007aqq.4	0	ENSMUSG00000026121	Sema4c	sema domain, immunoglobulin domain (Ig), transmembrane domain (TM) and short cytoplasmic domain, (semaphorin) 4C	uc007aqq.4;uc056ycm.1;uc007aqr.4;uc007aqs.2;uc007aqu.2;uc011wjn.1	20353;20353;20353;20353;381337;381337	0;0;0;0;0;0
chr13	84747698	84762839	15142	*	9.07	8.76	9.32	-0.56	3.11e-07	3e-06	457.34	408.08	615	663.62	Distal Intergenic	13	85189477	85202496	13020	1	66671	uc007ris.1	-426638	ENSMUSG00000021548	Ccnh	cyclin H	NA	NA	NA
chr11	95190779	95205987	15209	*	8.79	8.46	9.05	-0.59	3.12e-07	3e-06	362.68	342.35	517	545.88	Distal Intergenic	11	95143627	95145801	2175	2	13394	uc007laa.2	-44978	ENSMUSG00000020871	Dlx4	distal-less homeobox 4	NA	NA	NA
chr5	104563228	104596750	33523	*	9.78	9.98	9.53	0.45	3.14e-07	3.02e-06	1056.02	966.24	752	730.76	Promoter (<=1kb)	5	104571645	104584620	12976	1	69623	uc008ykq.2	0	NA	Zfp33b	zinc finger protein 33B	uc008ykq.2	69623	0
chr8	108345171	108828716	483546	*	14.02	13.96	14.09	-0.13	3.19e-07	3.07e-06	15991.7	15868.9	17319	17498.3	Promoter (<=1kb)	8	108553252	108584677	31426	2	109215	uc009nic.2	0	ENSMUSG00000110613	Lncbate1	brown adipose tissue enriched long non-coding RNA 1	uc009nic.2;uc009nid.1	109215;11906	0;0
chr7	44349517	44358577	9061	*	8.45	8.08	8.74	-0.66	3.19e-07	3.07e-06	274.67	265.84	406	450.52	Promoter (<=1kb)	7	44350898	44354644	3747	1	243961	uc009gpd.2	0	ENSMUSG00000038738	Shank1	SH3 and multiple ankyrin repeat domains 1	uc012fjo.1;uc009gpc.2;uc009gpd.2;uc009gpe.2;uc009gpf.3	243961;243961;243961;243961;69349	0;0;0;0;16453
chr18	51109231	51123757	14527	*	8.97	8.65	9.24	-0.59	3.21e-07	3.09e-06	364.68	436.53	575	634.43	Promoter (<=1kb)	18	51117898	51304641	186744	1	71373	uc008ewz.1	0	ENSMUSG00000073565	Prr16	proline rich 16	uc008ewz.1;uc008exa.1	71373;71373	0;0
chr1	54186098	54198286	12189	*	9.06	8.74	9.32	-0.59	3.25e-07	3.12e-06	438.01	416.91	583	699.62	Promoter (<=1kb)	1	53806874	54195034	388161	2	329152	uc007azk.2	0	ENSMUSG00000042807	Hecw2	HECT, C2 and WW domain containing E3 ubiquitin protein ligase 2	uc007azk.2;uc007azl.3;uc011wkw.3;uc007azm.1	329152;329152;329152;329152	0;0;0;0
chr10	69392464	69411340	18877	*	9.21	8.91	9.46	-0.55	3.26e-07	3.13e-06	472.68	487.53	644	765.79	Exon (uc007fms.1/uc007fms.1, exon 1 of 3)	10	69336635	69352912	16278	2	12534	uc007fmr.1	-39552	ENSMUSG00000019942	Cdk1	cyclin-dependent kinase 1	NA	NA	NA
chr12	21876030	21892682	16653	*	8.06	8.39	7.63	0.77	3.3e-07	3.16e-06	352.01	320.77	183	212.12	Distal Intergenic	12	22115756	22156646	40891	2	100043416	uc011ykv.1	263964	ENSMUSG00000093846	Gm4425	KRAB-domain protein pseudogene	NA	NA	NA
chr2	125498443	125515373	16931	*	9.23	8.95	9.47	-0.51	3.34e-07	3.2e-06	491.34	500.29	681	734.65	Promoter (<=1kb)	2	125300594	125506438	205845	2	14118	uc008mco.1	0	ENSMUSG00000027204	Fbn1	fibrillin 1	uc008mco.1;uc008mcp.1;uc008mcq.1;uc008mcr.1	14118;14118;14118;14118	0;0;0;0
chr5	84403045	84442100	39056	*	10.15	9.94	10.33	-0.39	3.43e-07	3.28e-06	986.69	981.94	1263	1318.48	Promoter (<=1kb)	5	84054761	84417382	362622	2	13839	uc008xwv.4	0	ENSMUSG00000029245	Epha5	Eph receptor A5	uc008xwv.4;uc008xww.1;uc008xwx.1;uc008xwy.1;uc008xwz.1;uc008xxa.1;uc008xxb.1	13839;13839;13839;13839;13839;13839;13839	0;0;0;0;0;0;0
chr3	117570591	117588060	17470	*	9.17	8.88	9.4	-0.52	3.45e-07	3.29e-06	482.01	463.01	675	679.19	Promoter (<=1kb)	3	117575227	117689508	114282	1	75769	uc008rda.3	0	ENSMUSG00000033342	Plppr5	phospholipid phosphatase related 5	uc008rda.3;uc008rdb.3	75769;75769	0;0
chr9	37138268	37182300	44033	*	10.3	10.09	10.48	-0.39	3.49e-07	3.34e-06	1118.03	1068.26	1380	1482.93	Promoter (<=1kb)	9	36890979	37147322	256344	2	208076	uc009oue.3	0	ENSMUSG00000035934	Pknox2	Pbx/knotted 1 homeobox 2	uc009oue.3;uc009ouf.3;uc009oug.2;uc009ouh.2	208076;208076;208076;208076	0;0;0;0
chr10	121303249	121318113	14865	*	9.28	9	9.52	-0.52	3.54e-07	3.37e-06	520.01	503.23	692	774.55	Promoter (<=1kb)	10	121263819	121311189	47371	2	74694	uc007hfm.3	0	ENSMUSG00000052302	Tbc1d30	TBC1 domain family, member 30	uc007hfm.3	74694	0
chr6	77223594	77254458	30865	*	9.99	9.73	10.2	-0.47	3.54e-07	3.37e-06	910.02	792.61	1110	1246.48	Promoter (<=1kb)	6	77242717	77245517	2801	1	74342	uc009cjt.1	0	ENSMUSG00000060780	Lrrtm1	leucine rich repeat transmembrane neuronal 1	uc009cjq.2;uc012enl.1;uc012enm.1;uc009cjt.1;uc009cju.1;uc009cjv.1	12386;12386;12386;74342;74342;74342	0;0;0;0;0;0
chr6	122480332	122504864	24533	*	9.74	9.49	9.96	-0.46	3.55e-07	3.38e-06	668.02	773.97	987	1003.21	Promoter (<=1kb)	6	122453609	122486305	32697	2	108653	uc009dpg.1	0	ENSMUSG00000040649	Rimklb	ribosomal modification protein rimK-like family member B	uc009dpg.1	108653	0
chr4	120250132	120274246	24115	*	9.48	9.21	9.71	-0.5	3.56e-07	3.39e-06	623.35	559.14	800	876.72	3' UTR	4	120267078	120287261	20184	2	329934	uc008unc.1	13015	ENSMUSG00000052135	Foxo6	forkhead box O6	uc008unc.1	329934	0
chr12	42339815	42349234	9420	*	7.78	8.14	7.31	0.83	3.58e-07	3.4e-06	296.01	267.8	164	153.74	Distal Intergenic	12	41451668	41486057	34390	2	16981	uc033gdi.1	-853758	ENSMUSG00000036295	Lrrn3	leucine rich repeat protein 3, neuronal	NA	NA	NA
chr13	113836364	113849391	13028	*	8.46	8.76	8.08	0.68	3.6e-07	3.42e-06	435.34	429.66	295	246.18	Intron (uc007rxj.1/218639, intron 1 of 4)	13	113794508	114157461	362954	1	218639	uc007rxj.1	41856	ENSMUSG00000042348	Arl15	ADP-ribosylation factor-like 15	uc007rxj.1;uc007rxk.2;uc011zev.1	218639;218639;218639	0;0;0
chr18	78042527	78053155	10629	*	8.93	8.61	9.19	-0.58	3.63e-07	3.44e-06	405.34	377.67	552	617.89	Exon (uc008fsb.1/620235, exon 2 of 6)	18	78043614	78057268	13655	2	620235	uc008fsb.1	4113	ENSMUSG00000091055	Siglec15	sialic acid binding Ig-like lectin 15	uc008fsb.1	620235	0
chr18	64647130	64670652	23523	*	9.72	9.47	9.94	-0.47	3.72e-07	3.53e-06	718.02	698.44	914	1049.92	Promoter (<=1kb)	18	64528979	64661000	132022	2	54670	uc008fem.1	0	ENSMUSG00000039529	Atp8b1	ATPase, class I, type 8B, member 1	uc008fem.1	54670	0
chr2	149816626	149835581	18956	*	9.3	9.03	9.53	-0.5	3.78e-07	3.58e-06	525.35	518.93	711	768.71	Promoter (<=1kb)	2	149830783	150004392	173610	1	433485	uc012cfp.1	0	ENSMUSG00000074736	Syndig1	synapse differentiation inducing 1	uc012cfp.1	433485	0
chr4	125267140	125325752	58613	*	10.84	10.66	11	-0.33	3.83e-07	3.63e-06	1600.7	1642.12	1968	2121.25	Distal Intergenic	4	125126367	125127881	1515	2	230738	uc008ury.2	-139259	ENSMUSG00000042677	Zc3h12a	zinc finger CCCH type containing 12A	NA	NA	NA
chr10	110446860	110462376	15517	*	9.15	8.84	9.4	-0.56	3.86e-07	3.64e-06	429.34	487.53	628	725.89	Distal Intergenic	10	110600650	110615961	15312	1	109335	uc007gzm.1	-138274	ENSMUSG00000112398	9230102K24Rik	RIKEN cDNA 9230102K24 gene	NA	NA	NA
chr7	44426347	44432294	5948	*	7.99	7.56	8.31	-0.75	3.87e-07	3.65e-06	182	195.21	324	312.35	Distal Intergenic	7	44442487	44463351	20865	1	272381	uc009gpj.2	-10193	ENSMUSG00000047085	Lrrc4b	leucine rich repeat containing 4B	NA	NA	NA
chr4	129740260	129779592	39333	*	10.17	9.97	10.35	-0.38	3.88e-07	3.66e-06	1002.69	998.61	1299	1311.67	Promoter (<=1kb)	4	129703169	129742303	39135	2	20218	uc008uyc.2	0	ENSMUSG00000028790	Khdrbs1	KH domain containing, RNA binding, signal transduction associated 1	uc008uyc.2;uc008uyd.3;uc008uye.2	20218;20218;20218	0;0;0
chr9	24708522	24715928	7407	*	7.7	8.06	7.22	0.84	3.91e-07	3.69e-06	268.67	265.84	155	143.04	Distal Intergenic	9	24557048	24696293	139246	2	320752	uc009opc.2	-12229	ENSMUSG00000085576	Dpy19l2	dpy-19-like 2 (C. elegans)	uc009ope.2	57246	0
chr2	147077973	147120873	42901	*	10.52	10.33	10.69	-0.36	3.93e-07	3.7e-06	1306.03	1263.47	1607	1686.29	Promoter (<=1kb)	2	147083876	147085345	1470	2	228731	uc008mss.1	0	ENSMUSG00000054160	Nkx2-4	NK2 homeobox 4	uc008mss.1;uc008msq.1;uc008msr.2;uc012cfl.2	228731;24128;24128;24128	0;0;0;0
chr4	76441861	76459837	17977	*	9.35	9.06	9.59	-0.53	3.98e-07	3.74e-06	550.01	515	709	832.93	Intron (uc008tjm.2/19266, intron 10 of 39)	4	75941237	78211895	2270659	2	19266	uc008tjm.2	1752058	ENSMUSG00000028399	Ptprd	protein tyrosine phosphatase, receptor type, D	uc008tjm.2;uc008tjp.1	19266;19266	0;0
chr8	94676960	94794244	117285	*	12.04	11.92	12.14	-0.22	3.98e-07	3.74e-06	3906.09	3857.12	4518	4516.89	Promoter (<=1kb)	8	94745684	94751388	5705	1	20299	uc009mww.1	0	ENSMUSG00000031779	Ccl22	chemokine (C-C motif) ligand 22	uc009mwt.3;uc009mwu.3;uc009mww.1;uc009mwx.2;uc009mwv.1	107566;107566;20299;20312;67801	0;0;0;0;0
chr10	115569041	115598816	29776	*	9.97	9.75	10.16	-0.41	4.02e-07	3.78e-06	856.69	865.2	1158	1123.87	Promoter (<=1kb)	10	115450314	115587780	137467	2	14160	uc007hbi.1	0	ENSMUSG00000020140	Lgr5	leucine rich repeat containing G protein coupled receptor 5	uc007hbi.1;uc007hbj.1;uc007hbk.1;uc007hbl.2	14160;14160;14160;77798	0;0;0;0
chr3	100484224	100490781	6558	*	8.22	7.82	8.53	-0.71	4.1e-07	3.84e-06	235.34	216.79	356	383.38	Promoter (<=1kb)	3	100471536	100489192	17657	2	74645	uc008qqu.2	0	ENSMUSG00000044468	Tent5c	terminal nucleotidyltransferase 5C	uc008qqu.2	74645	0
chr16	58514941	58532592	17652	*	9.36	9.09	9.58	-0.49	4.14e-07	3.88e-06	541.35	549.34	735	800.82	Promoter (<=1kb)	16	58470541	58523312	52772	2	54613	uc007znt.2	0	ENSMUSG00000022747	St3gal6	ST3 beta-galactoside alpha-2,3-sialyltransferase 6	uc007znt.2;uc007znu.2;uc007znv.2;uc007znw.1	54613;54613;54613;54613	0;0;0;0
chr6	37727837	37774195	46359	*	10.12	10.3	9.91	0.39	4.16e-07	3.9e-06	1261.36	1259.55	976	946.78	Distal Intergenic	6	37870811	37946799	75989	1	21848	uc009bji.1	-96616	ENSMUSG00000029833	Trim24	tripartite motif-containing 24	NA	NA	NA
chr5	106547667	106578439	30773	*	9.95	9.73	10.14	-0.41	4.17e-07	3.91e-06	850.02	853.43	1108	1153.06	Exon (uc008ylo.2/uc008ylo.2, exon 1 of 2)	5	106616741	106638328	21588	2	52397	uc008ylp.1	59889	ENSMUSG00000049606	Zfp644	zinc finger protein 644	NA	NA	NA
chr6	40429049	40465412	36364	*	10.15	9.95	10.33	-0.39	4.18e-07	3.91e-06	994.69	978.01	1281	1296.1	Promoter (<=1kb)	6	40401378	40436133	34756	2	243780	uc009bmo.1	0	ENSMUSG00000037172	E330009J07Rik	RIKEN cDNA E330009J07 gene	uc009bmo.1;uc009bmp.1;uc009bmq.2	243780;243780;381759	0;0;0
chr11	107789311	107803084	13774	*	9.1	8.82	9.34	-0.52	4.18e-07	3.91e-06	443.34	458.11	633	663.62	Promoter (<=1kb)	11	107734780	107794464	59685	2	54377	uc007maz.1	0	ENSMUSG00000020723	Cacng4	calcium channel, voltage-dependent, gamma subunit 4	uc007maz.1	54377	0
chr2	167525383	167570234	44852	*	10.32	10.12	10.49	-0.37	4.22e-07	3.94e-06	1125.36	1101.61	1440	1436.22	Promoter (<=1kb)	2	167538195	167542814	4620	1	20613	uc008nzy.3	0	ENSMUSG00000042821	Snai1	snail family zinc finger 1	uc008nzy.3	20613	0
chr4	147227636	147314760	87125	*	11.79	11.9	11.66	0.24	4.23e-07	3.94e-06	3880.76	3774.72	3289	3175.06	Promoter (<=1kb)	4	147253295	147513420	260126	1	195531	uc029vau.1	0	ENSMUSG00000078496	Zfp982	zinc finger protein 982	uc008vsu.3;uc029vau.1	195531;195531	0;0
chr5	100842318	100858313	15996	*	9.19	8.91	9.43	-0.52	4.28e-07	3.99e-06	490.01	471.84	663	715.19	Promoter (<=1kb)	5	100846229	100899102	52874	1	231510	uc008yih.1	0	ENSMUSG00000029314	Gpat3	glycerol-3-phosphate acyltransferase 3	uc008yih.1;uc008yii.1;uc008yij.1	231510;231510;231510	0;0;0
chr7	108184762	108195269	10508	*	8.15	8.47	7.74	0.73	4.33e-07	4.03e-06	376.68	332.54	212	216.02	Distal Intergenic	7	108171798	108172742	945	2	258489	uc009jcb.1	-12020	ENSMUSG00000096068	Olfr486	olfactory receptor 486	NA	NA	NA
chr16	35820468	35829535	9068	*	8.05	8.38	7.63	0.76	4.33e-07	4.03e-06	353.34	313.91	190	205.31	3' UTR	16	35770386	35828462	58077	1	66667	uc007zbq.1	50082	ENSMUSG00000022849	Hspbap1	Hspb associated protein 1	uc007zbs.2;uc012afb.1;uc007zbq.1;uc007zbr.1;uc012afa.1	547253;547253;66667;66667;66667	41847;41847;0;0;0
chr19	41435192	41445213	10022	*	9.03	8.72	9.29	-0.58	4.36e-07	4.05e-06	436.01	406.12	578	677.24	Distal Intergenic	19	41482645	41556614	73970	1	212391	uc008hlx.1	-37432	ENSMUSG00000025019	Lcor	ligand dependent nuclear receptor corepressor	NA	NA	NA
chr10	80833485	80845531	12047	*	9.09	8.77	9.35	-0.59	4.4e-07	4.09e-06	392.68	477.73	611	697.68	Promoter (<=1kb)	10	80832801	80844039	11239	2	237403	uc007gey.3	0	ENSMUSG00000051067	Lingo3	leucine rich repeat and Ig domain containing 3	uc011xiz.1;uc033frg.1;uc056yhp.1;uc007gey.3	100316778;18245;18245;237403	4688;6829;6829;0
chr4	124162863	124198394	35532	*	9.93	9.71	10.12	-0.41	4.43e-07	4.12e-06	822.69	853.43	1095	1132.63	Distal Intergenic	4	123917433	123936997	19565	1	54170	uc008uqn.1	245430	ENSMUSG00000028646	Rragc	Ras-related GTP binding C	NA	NA	NA
chr7	142959102	142983808	24707	*	10	9.78	10.19	-0.41	4.47e-07	4.15e-06	884.69	872.07	1130	1200.74	Promoter (<=1kb)	7	142966822	142969264	2443	2	17173	uc009koj.2	0	ENSMUSG00000009248	Ascl2	achaete-scute family bHLH transcription factor 2	uc009koj.2	17173	0
chr7	129251442	129263713	12272	*	8.57	8.2	8.86	-0.66	4.48e-07	4.15e-06	316.67	271.72	445	481.66	Promoter (<=1kb)	7	129257094	129391307	134214	1	381925	uc009jzl.1	0	ENSMUSG00000070366	Plpp4	phospholipid phosphatase 4	uc009jzl.1;uc012fuv.1	381925;381925	0;0
chr11	70243678	70264112	20435	*	9.2	8.93	9.44	-0.51	4.48e-07	4.15e-06	469.34	503.23	706	679.19	Promoter (<=1kb)	11	70241455	70255341	13887	2	11684	uc007juj.1	0	ENSMUSG00000000320	Alox12	arachidonate 12-lipoxygenase	uc007juf.2;uc007juj.1;uc007juk.1;uc007jul.1;uc007jui.2	104457;11684;11684;11684;52898	-3848;0;0;0;-3826
chr2	157075858	157090695	14838	*	8.93	8.63	9.18	-0.55	4.5e-07	4.17e-06	404.01	388.46	572	590.64	Promoter (<=1kb)	2	157010442	157079265	68824	2	320706	uc008nol.2	0	ENSMUSG00000055485	Soga1	suppressor of glucose, autophagy associated 1	uc008nol.2;uc012chx.1	320706;383766	0;0
chr1	184874805	184885643	10839	*	8.51	8.16	8.79	-0.63	4.52e-07	4.18e-06	278.01	294.29	446	438.84	Promoter (<=1kb)	1	184871926	184883036	11111	2	226777	uc007dys.1	0	ENSMUSG00000039349	C130074G19Rik	RIKEN cDNA C130074G19 gene	uc007dys.1	226777	0
chr15	84439731	84453312	13582	*	8.69	8.36	8.95	-0.6	4.55e-07	4.2e-06	334.01	321.75	495	496.25	Promoter (<=1kb)	15	84379203	84446545	67343	2	72301	uc007xca.2	0	ENSMUSG00000062760	Shisal1	shisa like 1	uc057kuj.1;uc007xca.2;uc007xcb.2	72301;72301;72301	-4449;0;0
chr5	37159409	37166177	6769	*	7.89	7.42	8.24	-0.82	4.58e-07	4.23e-06	162	180.5	270	335.7	Distal Intergenic	5	37242058	37292163	50106	1	12933	uc008xfl.2	-75881	ENSMUSG00000029121	Crmp1	collapsin response mediator protein 1	NA	NA	NA
chr3	158547486	158590338	42853	*	10.31	10.11	10.48	-0.37	4.58e-07	4.23e-06	1104.03	1113.38	1449	1412.87	Promoter (<=1kb)	3	158082895	158562221	479327	2	242274	uc008rvw.2	0	ENSMUSG00000028176	Lrrc7	leucine rich repeat containing 7	uc008rvw.2;uc008rvx.2;uc012dac.2	242274;242274;242274	0;0;0
chr18	38204962	38223197	18236	*	9.25	8.97	9.48	-0.51	4.67e-07	4.31e-06	490.01	514.02	682	748.27	Promoter (<=1kb)	18	38196694	38209762	13069	2	75599	uc008eru.1	0	ENSMUSG00000051375	Pcdh1	protocadherin 1	uc008eru.1	75599	0
chr15	55295680	55330257	34578	*	10.22	10.01	10.41	-0.39	4.68e-07	4.31e-06	1071.36	996.65	1330	1383.68	Promoter (<=1kb)	15	55307750	55520803	213054	1	12818	uc007vsc.2	0	ENSMUSG00000022371	Col14a1	collagen, type XIV, alpha 1	uc007vsc.2;uc007vsd.2	12818;12818	0;0
chr4	149575801	149594035	18235	*	9.32	9.04	9.55	-0.51	4.72e-07	4.34e-06	556.68	494.4	750	748.27	Promoter (<=1kb)	4	149586468	149648899	62432	1	65945	uc008vwo.2	0	ENSMUSG00000039953	Clstn1	calsyntenin 1	uc008vwo.2;uc008vwp.2	65945;65945	0;0
chr7	19400656	19428973	28318	*	9.9	9.66	10.11	-0.46	4.81e-07	4.42e-06	764.68	852.45	1039	1178.36	Promoter (<=1kb)	7	19417466	19421417	3952	2	100503495	uc009flv.1	0	ENSMUSG00000040705	A930016O22Rik	RIKEN cDNA A930016O22 gene	uc009flv.1;uc033iwz.1;uc009flu.1;uc009flq.1;uc009flr.1;uc012fbc.1;uc009fls.2;uc033iwy.1;uc009flt.2;uc009flw.1;uc009flx.1;uc009fly.1;uc012fbe.1	100503495;100503495;12715;13871;13871;13871;232943;232943;232943;232944;232944;232944;232944	0;0;0;18617;18617;18617;-735;-735;0;0;0;0;0
chr6	118454625	118486857	32233	*	10.08	9.87	10.26	-0.4	4.85e-07	4.45e-06	905.35	964.28	1214	1246.48	Promoter (<=1kb)	6	118461950	118479273	17324	2	22750	uc009dlq.1	0	ENSMUSG00000072623	Zfp9	zinc finger protein 9	uc009dlq.1;uc009dlp.1;uc012erd.1	22750;72720;72720	0;0;0
chr2	102654636	102676222	21587	*	9.36	9.1	9.59	-0.49	4.96e-07	4.55e-06	532.01	566.01	746	793.03	Promoter (<=1kb)	2	102658683	102790784	132102	1	20511	uc008lid.2	0	ENSMUSG00000005089	Slc1a2	solute carrier family 1 (glial high affinity glutamate transporter), member 2	uc008lid.2	20511	0
chr7	82329658	82346129	16472	*	9.35	9.08	9.58	-0.5	4.97e-07	4.55e-06	564.01	518.93	742	789.14	Promoter (<=1kb)	7	82335694	82614448	278755	1	269959	uc009ida.2	0	ENSMUSG00000070469	Adamtsl3	ADAMTS-like 3	uc009ida.2	269959	0
chr6	124950756	124956102	5347	*	7.23	7.66	6.63	1.02	5e-07	4.58e-06	192	211.89	111	87.57	Downstream (2-3kb)	6	124958807	124965397	6591	2	26894	uc009dss.2	9295	ENSMUSG00000030127	Cops7a	COP9 signalosome subunit 7A	uc009dsr.2;uc009dss.2	26894;26894	9427;9295
chr14	70498059	70547489	49431	*	10.64	10.46	10.81	-0.35	5.04e-07	4.61e-06	1401.37	1406.69	1714	1871.17	Promoter (<=1kb)	14	70474555	70508914	34360	2	12153	uc007uob.2	0	ENSMUSG00000022098	Bmp1	bone morphogenetic protein 1	uc007uob.2;uc007uoc.2;uc007uod.2;uc007uoe.3;uc007uof.2;uc007uog.2;uc007uoh.2;uc007uoi.2	12153;12153;12153;20389;213469;213469;213469;72549	0;0;0;0;0;0;0;0
chr4	42899694	42926196	26503	*	9.78	9.55	9.99	-0.44	5.09e-07	4.66e-06	771.35	724.93	981	1047.97	Promoter (<=1kb)	4	42916727	42941607	24881	1	230085	uc008soi.1	0	ENSMUSG00000036062	Phf24	PHD finger protein 24	uc008soi.1;uc008soj.1;uc008sok.1	230085;230085;230085	0;0;0
chr4	114635213	114673932	38720	*	9.95	9.72	10.16	-0.44	5.12e-07	4.68e-06	889.35	796.54	1103	1179.33	Distal Intergenic	4	114821720	114856166	34447	1	433746	uc012diw.1	-147788	ENSMUSG00000055198	Gm12830	predicted gene 12830	NA	NA	NA
chr4	43519119	43527829	8711	*	8.49	8.12	8.79	-0.67	5.15e-07	4.7e-06	300.67	255.05	426	457.33	Promoter (<=1kb)	4	43513726	43523554	9829	2	22004	uc008sqb.2	0	ENSMUSG00000028464	Tpm2	tropomyosin 2, beta	uc008sqe.2;uc008sqb.2;uc008sqc.2;uc008sqd.2	21894;22004;22004;22004	0;0;0;0
chr5	134982737	134990579	7843	*	8.32	7.96	8.62	-0.66	5.21e-07	4.75e-06	245.34	251.12	390	396.03	Promoter (<=1kb)	5	134986214	134987476	1263	1	12739	uc008zxe.2	0	ENSMUSG00000070473	Cldn3	claudin 3	uc008zxe.2;uc008zxf.1	12739;71304	0;0
chr4	128802846	128809727	6882	*	7.92	7.48	8.26	-0.78	5.27e-07	4.81e-06	180.67	176.57	284	330.84	Promoter (<=1kb)	4	128773085	128806112	33028	2	230761	uc008uvn.1	0	ENSMUSG00000028799	Zfp362	zinc finger protein 362	uc008uvn.1	230761	0
chr10	24701192	24724573	23382	*	9.61	9.37	9.82	-0.44	5.42e-07	4.93e-06	649.35	676.86	914	891.31	Promoter (<=1kb)	10	24637914	24712159	74246	2	18605	uc007eqx.2	0	ENSMUSG00000037370	Enpp1	ectonucleotide pyrophosphatase/phosphodiesterase 1	uc007eqx.2;uc007eqy.2;uc011xbs.2;uc007eqz.2	18605;18605;18605;18605	0;0;0;0
chr6	115123839	115149452	25614	*	9.72	9.48	9.93	-0.45	5.44e-07	4.95e-06	747.35	684.71	961	990.56	Promoter (<=1kb)	6	115127600	115134835	7236	2	100503783	uc009dil.2	0	ENSMUSG00000097486	Gm17733	predicted gene, 17733	uc009dil.2;uc009dim.3;uc009din.2	100503783;20965;20965	0;0;0
chr19	6827071	6850082	23012	*	9.68	9.41	9.9	-0.49	5.45e-07	4.95e-06	705.35	655.28	878	1035.32	Promoter (<=1kb)	19	6829886	6829944	59	2	100628576	uc029tqw.1	0	ENSMUSG00000104884	Mir5046	microRNA 5046	uc029tqw.1;uc057lad.1;uc008gjb.1	100628576;56613;78317	0;0;0
chr10	128888531	128912363	23833	*	9.63	9.39	9.83	-0.45	5.45e-07	4.95e-06	648.01	691.57	918	905.91	Promoter (<=1kb)	10	128908919	128912822	3904	1	12512	uc007hou.2	0	ENSMUSG00000025351	Cd63	CD63 antigen	uc007hou.2;uc033fto.2;uc007hov.2;uc033ftn.1;uc007hot.1;uc007how.2;uc007hox.2;uc007hoy.1	12512;12512;12512;14561;14561;19682;19682;19682	0;0;0;-402;0;6934;6934;6934
chr16	74401493	74423511	22019	*	9.42	9.16	9.64	-0.48	5.46e-07	4.96e-06	594.68	548.35	794	802.77	Promoter (<=1kb)	16	73892306	74410912	518607	2	268902	uc007zrh.1	0	ENSMUSG00000052516	Robo2	roundabout guidance receptor 2	uc007zrh.1;uc007zrj.1;uc007zrk.1;uc007zrl.1	268902;268902;268902;268902	0;0;0;0
chr12	84047086	84082487	35402	*	10.26	10.06	10.44	-0.38	5.51e-07	5e-06	1034.02	1097.69	1350	1425.52	Promoter (<=1kb)	12	84052151	84059565	7415	1	171281	uc007oef.2	0	ENSMUSG00000021228	Acot3	acyl-CoA thioesterase 3	uc007oef.2;uc007oeg.2;uc007oed.1;uc057kot.1;uc007oeh.1	171281;171281;171282;217698;217698	0;0;0;0;0
chr1	128881393	128889399	8007	*	7.66	8.03	7.17	0.86	5.52e-07	5.01e-06	274.67	248.18	156	131.36	Distal Intergenic	1	128588199	128592299	4101	2	12767	uc007clt.1	-289094	ENSMUSG00000045382	Cxcr4	chemokine (C-X-C motif) receptor 4	NA	NA	NA
chr1	154706905	154733718	26814	*	9.83	9.61	10.03	-0.42	5.61e-07	5.07e-06	791.35	772.99	1044	1044.08	Promoter (<=1kb)	1	154392519	154725920	333402	2	12290	uc007dav.1	0	ENSMUSG00000004110	Cacna1e	calcium channel, voltage-dependent, R type, alpha 1E subunit	uc007dav.1	12290	0
chr5	92374812	92400542	25731	*	9.66	9.42	9.87	-0.44	5.67e-07	5.13e-06	666.68	707.27	907	963.32	Promoter (<=1kb)	5	92386908	92393177	6270	1	109979	uc008ydc.1	0	ENSMUSG00000034842	Art3	ADP-ribosyltransferase 3	uc008ycw.2;uc008ycx.2;uc057bup.2;uc008ydc.1;uc008ydd.3;uc008yde.1;uc012dyq.1;uc008ydg.3;uc057buq.2;uc008ydh.3;uc008ydi.3	109979;109979;109979;109979;109979;109979;109979;109979;109979;109979;109979	0;0;0;0;0;0;0;0;0;-4295;-4295
chr12	54980294	55004441	24148	*	9.56	9.32	9.78	-0.46	5.75e-07	5.2e-06	660.02	615.06	864	890.34	Promoter (<=1kb)	12	54892989	54986336	93348	2	217578	uc007nnz.2	0	ENSMUSG00000035021	Baz1a	bromodomain adjacent to zinc finger domain 1A	uc007nnz.2	217578	0
chr7	87562757	87591346	28590	*	9.73	9.5	9.93	-0.43	5.8e-07	5.24e-06	726.02	723.95	962	988.62	Promoter (<=1kb)	7	87584168	87805180	221013	1	108071	uc009ifp.2	0	ENSMUSG00000049583	Grm5	glutamate receptor, metabotropic 5	uc009ifp.2;uc009ifr.2;uc009ifs.2;uc009ifq.1	108071;108071;108071;108071	0;0;0;0
chr17	46480830	46497713	16884	*	9.16	8.88	9.39	-0.51	5.87e-07	5.29e-06	462.68	480.67	657	685.03	Promoter (<=1kb)	17	46442448	46487675	45228	2	106763	uc008csx.2	0	ENSMUSG00000015599	Ttbk1	tau tubulin kinase 1	uc008csx.2;uc008csy.2;uc008csz.1;uc008ctb.2;uc008ctc.2;uc008ctd.1	106763;106763;381101;78309;78309;78309	0;0;0;0;0;0
chr11	52163071	52175519	12449	*	8.89	8.57	9.15	-0.57	5.89e-07	5.31e-06	377.34	384.53	529	604.26	Distal Intergenic	11	52154876	52157907	3032	2	257871	uc011xuo.1	-5164	NA	Olfr1372-ps1	olfactory receptor 1372, pseudogene 1	NA	NA	NA
chr11	59129412	59141349	11938	*	8.78	8.45	9.05	-0.6	5.9e-07	5.32e-06	356.67	343.33	493	565.34	Promoter (<=1kb)	11	58994256	59136375	142120	2	380698	uc029rlw.1	0	ENSMUSG00000061462	Obscn	obscurin, cytoskeletal calmodulin and titin-interacting RhoGEF	uc029rlw.1;uc029rlx.1	380698;380698	0;0
chr13	83491790	83545290	53501	*	10.75	10.58	10.9	-0.32	5.94e-07	5.35e-06	1526.7	1524.4	1879	1942.21	Promoter (<=1kb)	13	83504034	83667079	163046	1	17260	uc007rie.2	0	ENSMUSG00000005583	Mef2c	myocyte enhancer factor 2C	uc007rie.2;uc007rik.2;uc007rif.1;uc007rij.3	17260;17260;17260;17260	0;0;0;0
chr1	52717977	52730915	12939	*	8.93	8.62	9.19	-0.57	6.03e-07	5.42e-06	422.01	364.92	584	586.75	Promoter (<=1kb)	1	52656304	52727318	71015	2	98682	uc007ayl.4	0	ENSMUSG00000041439	Mfsd6	major facilitator superfamily domain containing 6	uc007ayl.4;uc007aym.1;uc007ayn.1	98682;98682;98682	0;0;0
chr5	33684465	33732374	47910	*	10.71	10.36	10.99	-0.63	6.03e-07	5.42e-06	1295.36	1341.95	1853	2215.63	Promoter (<=1kb)	5	33721724	33737068	15345	1	14184	uc008xbe.3	0	ENSMUSG00000054252	Fgfr3	fibroblast growth factor receptor 3	uc008xbe.3;uc008xbf.3;uc008xbg.3;uc008xbh.3;uc012dut.2	14184;14184;14184;14184;14184	0;0;0;0;0
chr11	114848735	114857788	9054	*	8.48	8.09	8.78	-0.69	6.04e-07	5.43e-06	304.67	241.32	439	441.76	Promoter (<=1kb)	11	114851532	114872617	21086	1	70355	uc007mfw.2	0	ENSMUSG00000051043	Gprc5c	G protein-coupled receptor, family C, group 5, member C	uc007mfw.2;uc011yhg.1;uc007mfx.2	70355;70355;70355	0;0;0
chr3	68861293	68881192	19900	*	9.51	9.26	9.73	-0.47	6.07e-07	5.44e-06	614.01	612.12	806	894.23	Promoter (<=1kb)	3	68869586	68872163	2578	1	68725	uc012cqj.1	0	ENSMUSG00000046999	1110032F04Rik	RIKEN cDNA 1110032F04 gene	uc012cqj.1	68725	0
chr2	180378181	180391570	13390	*	8.77	8.44	9.04	-0.59	6.07e-07	5.44e-06	369.34	326.66	515	536.15	Promoter (<=1kb)	2	180370858	180385885	15028	2	320485	uc008oiy.2	0	NA	B230312C02Rik	RIKEN cDNA B230312C02 gene	uc008oiy.2;uc008oiz.2;uc012cmb.1;uc008oja.1	320485;320485;387136;622283	0;0;0;0
chr13	69729087	69747251	18165	*	9.4	9.13	9.62	-0.49	6.08e-07	5.45e-06	568.68	552.28	746	828.06	Promoter (<=1kb)	13	69702832	69739897	37066	2	76980	uc007rcp.2	0	ENSMUSG00000052981	Ube2ql1	ubiquitin-conjugating enzyme E2Q family-like 1	uc007rcp.2	76980	0
chr7	65515067	65533847	18781	*	9.36	9.1	9.58	-0.48	6.12e-07	5.48e-06	549.35	545.41	739	791.09	Distal Intergenic	7	65582031	65619347	37317	1	407810	uc009hgq.2	-48184	ENSMUSG00000086662	BC046251	cDNA sequence BC046251	NA	NA	NA
chr17	34257929	34267180	9252	*	8.52	8.18	8.8	-0.62	6.15e-07	5.5e-06	291.34	288.4	439	451.49	Promoter (<=1kb)	17	34263227	34269418	6192	1	14961	uc008ccb.2	0	ENSMUSG00000073421	H2-Ab1	histocompatibility 2, class II antigen A, beta 1	uc008ccb.2;uc008ccc.1;uc029thf.1;uc008cby.1	14961;14961;14969;18132	0;0;0;0
chr1	134223155	134247272	24118	*	9.6	9.36	9.81	-0.45	6.23e-07	5.56e-06	641.35	669.01	864	928.29	Promoter (<=1kb)	1	134199215	134234856	35642	2	11539	uc056yea.1	0	ENSMUSG00000042429	Adora1	adenosine A1 receptor	uc056yea.1;uc007crj.2;uc007crk.2;uc033fli.1;uc033flj.1	11539;11539;11539;11539;11539	0;0;0;0;0
chr6	99720597	99732972	12376	*	8.96	8.64	9.22	-0.58	6.24e-07	5.57e-06	394.01	406.12	545	648.05	Promoter (<=1kb)	6	99711299	99726392	15094	2	50501	uc009dbt.1	0	ENSMUSG00000030069	Prok2	prokineticin 2	uc009dbt.1;uc009dbu.1;uc012epr.1;uc009dbv.1	50501;50501;50501;50501	0;0;0;0
chr14	39459094	39487436	28343	*	9.85	9.62	10.04	-0.42	6.26e-07	5.58e-06	766.68	806.35	1016	1094.68	Promoter (<=1kb)	14	38368951	39473088	1104138	2	18183	uc007tbz.2	0	ENSMUSG00000041014	Nrg3	neuregulin 3	uc007tbz.2;uc011zjc.1;uc011zjd.1;uc007tca.1;uc057beo.2	18183;18183;18183;18183;432842	0;0;0;0;0
chr7	59027562	59053387	25826	*	9.24	9.46	8.97	0.5	6.29e-07	5.61e-06	712.02	699.42	503	498.2	Distal Intergenic	7	59228750	59287462	58713	1	22215	uc009heg.1	-175363	ENSMUSG00000025326	Ube3a	ubiquitin protein ligase E3A	NA	NA	NA
chr3	101920598	101935051	14454	*	8.96	8.67	9.21	-0.54	6.34e-07	5.65e-06	411.34	402.19	575	609.13	Promoter (<=1kb)	3	101855768	101924453	68686	2	242126	uc008qrl.3	0	ENSMUSG00000033147	Slc22a15	solute carrier family 22 (organic anion/cation transporter), member 15	uc008qrl.3;uc008qrn.2	242126;242126	0;0
chr6	29211288	29216911	5624	*	7.83	7.37	8.18	-0.81	6.35e-07	5.65e-06	152.67	178.53	270	309.43	Promoter (<=1kb)	6	29200437	29212297	11861	2	23917	uc009bda.2	0	ENSMUSG00000003500	Impdh1	inosine monophosphate dehydrogenase 1	uc009bda.2;uc009bdb.2;uc009bdc.2	23917;23917;23917	0;0;0
chr9	85834008	85852892	18885	*	9.34	9.09	9.56	-0.48	6.41e-07	5.7e-06	550.68	535.6	761	753.14	Promoter (<=1kb)	9	85842380	85847055	4676	1	21983	uc009qwz.2	0	ENSMUSG00000035274	Tpbg	trophoblast glycoprotein	uc009qwz.2;uc009qxa.2	21983;21983	0;0
chr4	8458816	8468404	9589	*	8.17	8.49	7.75	0.74	6.45e-07	5.73e-06	340.01	378.65	234	196.56	Distal Intergenic	4	8535644	8607702	72059	1	59021	uc008rxw.1	-67240	ENSMUSG00000047187	Rab2a	RAB2A, member RAS oncogene family	NA	NA	NA
chr7	57497127	57516054	18928	*	9.34	9.06	9.57	-0.51	6.51e-07	5.77e-06	537.35	531.68	705	819.31	Promoter (<=1kb)	7	57407669	57510009	102341	2	110886	uc009heb.1	0	ENSMUSG00000055078	Gabra5	gamma-aminobutyric acid (GABA) A receptor, subunit alpha 5	uc009heb.1;uc009hec.1	110886;110886	0;0
chr6	63247288	63267069	19782	*	9.55	9.31	9.76	-0.45	6.53e-07	5.79e-06	625.35	643.51	844	892.29	Promoter (<=1kb)	6	63256857	63504872	248016	1	14804	uc009cdx.1	0	ENSMUSG00000071424	Grid2	glutamate receptor, ionotropic, delta 2	uc009cdx.1;uc009cdy.1;uc009cdz.1	14804;14804;14804	0;0;0
chr5	28454782	28478700	23919	*	10.36	9.96	10.67	-0.71	6.54e-07	5.8e-06	998.02	996.65	1469	1785.54	Promoter (<=1kb)	5	28456840	28467101	10262	2	20423	uc008wua.2	0	ENSMUSG00000002633	Shh	sonic hedgehog	uc008wua.2;uc008wub.1;uc012dts.1	20423;654796;654796	0;0;0
chr17	8338432	8357120	18689	*	9.17	8.88	9.41	-0.53	6.59e-07	5.83e-06	479.34	463.01	636	723.95	Promoter (<=1kb)	17	8340406	8344113	3708	1	320111	uc008ajo.1	0	ENSMUSG00000055945	Prr18	proline rich 18	uc008ajo.1;uc012ajr.1	320111;320111	0;0
chr10	59941059	59982801	41743	*	10.44	10.25	10.61	-0.36	6.63e-07	5.86e-06	1230.03	1204.61	1510	1618.18	Promoter (<=1kb)	10	59949675	59951770	2096	2	74747	uc007fee.1	0	ENSMUSG00000020108	Ddit4	DNA-damage-inducible transcript 4	uc007fee.1	74747	0
chr11	72486324	72493555	7232	*	8.21	7.81	8.52	-0.71	6.74e-07	5.96e-06	216.67	231.51	337	397	Promoter (<=1kb)	11	72451638	72489920	38283	2	216892	uc007jyz.3	0	ENSMUSG00000040447	Spns2	spinster homolog 2	uc007jyz.3;uc007jzb.1;uc011xyk.1	216892;77577;77577	0;56691;56691
chr6	148440501	148454018	13518	*	8.98	8.68	9.23	-0.56	6.75e-07	5.96e-06	390.68	427.7	567	635.4	Promoter (<=1kb)	6	148232430	148444352	211923	2	387314	uc009eti.2	0	ENSMUSG00000030306	Tmtc1	transmembrane and tetratricopeptide repeat containing 1	uc009eti.2;uc009etj.2;uc012evv.1	387314;387314;387314	0;0;0
chr9	107371388	107385266	13879	*	8.87	8.54	9.14	-0.6	6.88e-07	6.07e-06	332.01	413.96	563	565.34	Distal Intergenic	9	107399880	107513332	113453	1	56808	uc012hae.1	-14614	ENSMUSG00000010066	Cacna2d2	calcium channel, voltage-dependent, alpha 2/delta subunit 2	NA	NA	NA
chr19	6530577	6533489	2913	*	7.32	6.72	7.74	-1.02	6.89e-07	6.08e-06	113.34	98.1	183	245.21	3' UTR	19	6418738	6533217	114480	1	18190	uc008giu.2	111839	ENSMUSG00000033768	Nrxn2	neurexin II	uc008giu.2;uc008giv.2;uc012bhm.2;uc008giy.1;uc012bhn.2;uc012bho.2	18190;18190;18190;18190;20521;20521	0;0;0;0;8060;9581
chr6	147251801	147270858	19058	*	9.45	9.2	9.66	-0.47	6.9e-07	6.08e-06	577.35	596.42	785	837.79	Promoter (<=1kb)	6	147252109	147264013	11905	2	19227	uc009esx.3	0	ENSMUSG00000048776	Pthlh	parathyroid hormone-like peptide	uc009esx.3	19227	0
chr19	29238423	29260477	22055	*	9.52	9.28	9.74	-0.46	6.91e-07	6.08e-06	612.68	626.83	818	888.39	Promoter (<=1kb)	19	29251803	29313080	61278	1	16452	uc008hdb.2	0	ENSMUSG00000024789	Jak2	Janus kinase 2	uc008hdb.2;uc008hdc.2	16452;16452	0;0
chr18	82399331	82426035	26705	*	9.8	9.56	10	-0.43	7.03e-07	6.18e-06	764.68	749.45	975	1067.43	Promoter (<=1kb)	18	82392496	82406777	14282	2	14427	uc008ftq.1	0	ENSMUSG00000024553	Galr1	galanin receptor 1	uc008ftq.1	14427	0
chr3	107508227	107527112	18886	*	9.42	9.16	9.64	-0.48	7.04e-07	6.19e-06	588.68	555.22	767	830.01	Promoter (<=1kb)	3	107467548	107518018	50471	2	229706	uc008qxb.1	0	ENSMUSG00000027894	Slc6a17	solute carrier family 6 (neurotransmitter transporter), member 17	uc008qxb.1;uc008qxc.1;uc008qxd.1	229706;229706;229706	0;0;0
chr1	9948513	9978454	29942	*	9.99	9.76	10.18	-0.42	7.08e-07	6.21e-06	824.69	908.36	1110	1212.42	Promoter (<=1kb)	1	9960163	9967485	7323	2	100039596	uc033fhz.1	0	ENSMUSG00000099032	Tcf24	transcription factor 24	uc033fhz.1;uc007ahb.2;uc007ahc.2;uc007aha.1	100039596;69312;69312;73824	0;0;0;-4395
chr7	31468935	31498281	29347	*	9.47	9.69	9.22	0.47	7.15e-07	6.28e-06	830.02	823.02	568	624.7	Distal Intergenic	7	31375592	31376916	1325	1	384585	uc029wep.1	93343	ENSMUSG00000095257	Scgb1b3	secretoglobin, family 1B, member 3	NA	NA	NA
chr17	25566419	25578296	11878	*	8.69	8.36	8.95	-0.59	7.19e-07	6.31e-06	329.34	328.62	513	476.79	Promoter (<=1kb)	17	25565893	25570686	4794	2	20681	uc008bay.1	0	ENSMUSG00000024176	Sox8	SRY (sex determining region Y)-box 8	uc008bay.1;uc008bba.1;uc008bbb.2;uc008bbc.2;uc008bbd.2;uc008bbf.3;uc033hbx.1	20681;20681;72834;76483;76483;76483;76483	0;0;0;-878;-878;-878;-878
chr5	137808742	137817446	8705	*	7.55	7.92	7.05	0.87	7.21e-07	6.32e-06	250.01	233.47	127	137.2	Exon (uc009adz.2/381678, exon 8 of 17)	5	137787802	137822621	34820	1	381678	uc009adz.2	20940	ENSMUSG00000037108	Zcwpw1	zinc finger, CW type with PWWP domain 1	uc009aeb.2;uc009aea.2;uc009adz.2	231805;231805;381678	18805;18832;0
chr4	60458749	60488556	29808	*	9.24	9.47	8.97	0.5	7.33e-07	6.42e-06	729.35	684.71	497	505.01	Intron (uc029uuo.3/17841, intron 5 of 5)	4	60218621	60661863	443243	2	17841	uc029uuo.3	173307	ENSMUSG00000078688	Mup2	major urinary protein 2	uc029uuo.3	17841	0
chr14	60374062	60387765	13704	*	9.06	8.76	9.31	-0.56	7.34e-07	6.42e-06	420.68	445.35	584	688.92	Promoter (<=1kb)	14	60378286	60381003	2718	1	72125	uc007ufb.2	0	ENSMUSG00000021986	Amer2	APC membrane recruitment 2	uc007ufb.2;uc011zmz.1	72125;72125	0;0
chr12	4034321	4045911	11591	*	8.81	8.5	9.06	-0.56	7.36e-07	6.44e-06	351.34	373.74	524	546.85	Promoter (<=1kb)	12	3962554	4038915	76362	2	668212	uc007mxh.1	0	ENSMUSG00000020658	Efr3b	EFR3 homolog B	uc007mxh.1	668212	0
chr5	119033909	119097008	63100	*	11.02	10.85	11.16	-0.31	7.38e-07	6.44e-06	1839.38	1863.82	2214	2371.32	Distal Intergenic	5	119108236	119114543	6308	1	73477	uc029vnw.1	-11228	ENSMUSG00000100573	1700081H04Rik	RIKEN cDNA 1700081H04 gene	NA	NA	NA
chr16	90824524	90840736	16213	*	9.16	8.86	9.41	-0.55	7.39e-07	6.45e-06	434.01	493.42	626	735.62	Promoter (<=1kb)	16	90826719	90905109	78391	1	70967	uc007zwp.3	0	ENSMUSG00000039903	Eva1c	eva-1 homolog C (C. elegans)	uc007zwp.3;uc007zwq.3;uc007zwr.3;uc007zws.3;uc012aie.2;uc012aif.2	70967;70967;70967;70967;70967;70967	0;0;0;0;0;0
chr12	55594498	55614896	20399	*	9.65	9.4	9.86	-0.46	7.42e-07	6.47e-06	685.35	665.09	872	987.64	Promoter (<=1kb)	12	55602890	55612758	9869	2	56784	uc057kob.1	0	ENSMUSG00000021027	Ralgapa1	Ral GTPase activating protein, alpha subunit 1	uc057kob.1;uc007nou.2;uc057koc.1;uc057kod.1;uc057koe.1;uc007not.2	56784;56784;56784;56784;56784;56856	0;0;0;0;0;0
chr7	130248675	130279984	31310	*	10.24	10.03	10.42	-0.39	7.5e-07	6.53e-06	1056.69	1030	1297	1443.03	Promoter (<=1kb)	7	130162451	130262066	99616	2	14183	uc009jzr.1	0	ENSMUSG00000030849	Fgfr2	fibroblast growth factor receptor 2	uc009jzr.1;uc009jzs.1;uc012fuw.1;uc033jch.1;uc033jci.1;uc057lvj.1;uc009jzv.1;uc033jcj.1;uc033jck.1;uc009jzw.2;uc009jzx.2;uc009jzy.2;uc033jcl.1;uc012fux.2;uc012fuy.2;uc033jcm.1;uc009jzz.1	14183;14183;14183;14183;14183;14183;14183;14183;14183;14183;14183;14183;14183;14183;14183;14183;14183	0;0;0;0;0;0;0;0;0;0;0;0;0;0;0;0;0
chr19	50671140	50688644	17505	*	9.16	8.87	9.4	-0.53	7.55e-07	6.57e-06	488.68	449.28	642	710.33	Promoter (<=1kb)	19	50143301	50678646	535346	2	58178	uc029tst.1	0	ENSMUSG00000043531	Sorcs1	sortilin-related VPS10 domain containing receptor 1	uc029tst.1;uc008hwa.4;uc008hwb.3;uc008hwc.3	58178;58178;58178;58178	0;0;0;0
chr17	29393755	29426921	33167	*	10.17	9.95	10.35	-0.4	7.6e-07	6.61e-06	1030.69	948.58	1259	1355.46	Distal Intergenic	17	29365416	29379535	14120	1	26382	uc008bsy.2	28339	ENSMUSG00000024013	Fgd2	FYVE, RhoGEF and PH domain containing 2	NA	NA	NA
chr4	138248794	138266971	18178	*	9.22	8.95	9.44	-0.49	7.66e-07	6.66e-06	502.01	486.55	695	697.68	Promoter (<=1kb)	4	138250411	138301973	51563	1	16559	uc008vko.2	0	ENSMUSG00000028758	Kif17	kinesin family member 17	uc008vkg.4;uc008vkh.4;uc008vki.4;uc008vkj.4;uc008vkk.4;uc033ifz.2;uc008vkl.4;uc008vko.2;uc008vkp.1;uc008vkq.2;uc008vkr.2;uc008vkm.1;uc008vkn.1	15441;15441;15441;15441;15441;15441;15441;16559;16559;16559;16559;230863;230863	32182;32182;32182;32182;32182;32182;31667;0;0;0;0;0;0
chr11	76013446	76033785	20340	*	9.31	9.05	9.54	-0.48	7.68e-07	6.67e-06	535.35	526.77	723	760.92	Promoter (<=1kb)	11	76019194	76027782	8589	2	76566	uc007kez.3	0	ENSMUSG00000020846	Rflnb	refilin B	uc007kez.3	76566	0
chr6	85477806	85486608	8803	*	8.47	8.12	8.75	-0.63	7.71e-07	6.69e-06	286.67	269.76	427	433.98	5' UTR	6	85469574	85502994	33421	2	330369	uc009cpw.3	16386	ENSMUSG00000047013	Fbxo41	F-box protein 41	uc009cpw.3;uc009cpx.3;uc033isv.2	330369;330369;330369	0;0;0
chr16	38705456	38714343	8888	*	8.4	8.05	8.69	-0.64	7.78e-07	6.74e-06	268.67	260.93	410	414.52	Promoter (<=1kb)	16	38598343	38713035	114693	2	12549	uc007zfg.1	0	ENSMUSG00000022799	Arhgap31	Rho GTPase activating protein 31	uc007zfg.1;uc007zfh.1	12549;12549	0;0
chr16	97354899	97360579	5681	*	8.13	7.73	8.44	-0.71	7.8e-07	6.76e-06	218.67	205.02	334	359.05	Promoter (<=1kb)	16	97356728	97439012	82285	1	56175	uc008ade.2	0	ENSMUSG00000040605	Bace2	beta-site APP-cleaving enzyme 2	uc008ade.2	56175	0
chr3	56165631	56192821	27191	*	9.72	9.49	9.92	-0.43	7.86e-07	6.8e-06	700.68	739.64	959	975.97	Promoter (<=1kb)	3	55625198	56183701	558504	2	26422	uc033htl.1	0	ENSMUSG00000027799	Nbea	neurobeachin	uc033htl.1	26422	0
chr5	105713605	105723967	10363	*	8.05	8.38	7.63	0.74	7.87e-07	6.8e-06	349.34	314.89	212	184.88	Intron (uc008ylg.2/231549, intron 1 of 2)	5	105699969	105815215	115247	1	231549	uc008ylg.2	13636	ENSMUSG00000046079	Lrrc8d	leucine rich repeat containing 8D	uc008ylg.2;uc008ylh.2	231549;231549	0;0
chr17	43616231	43634939	18709	*	9.41	9.15	9.64	-0.49	7.87e-07	6.8e-06	522.01	611.14	794	800.82	Promoter (<=1kb)	17	43615335	43630299	14965	2	210510	uc008cpi.2	0	ENSMUSG00000040140	Tdrd6	tudor domain containing 6	uc008cpi.2;uc012ats.1;uc012att.1;uc012atr.1	210510;210510;210510;27226	0;0;0;47780
chr4	156201318	156210747	9430	*	8.74	8.41	9.02	-0.61	7.9e-07	6.82e-06	356.67	323.72	483	552.69	Promoter (<=1kb)	4	156203284	156206028	2745	1	100382	uc008wgl.2	0	NA	AW011738	expressed sequence AW011738	uc012dri.1;uc008wgl.2;uc008wgf.2;uc008wgi.1	100038882;100382;11603;11603	-500;0;-3830;-3830
chr17	50188921	50196386	7466	*	8.07	7.67	8.39	-0.72	7.97e-07	6.88e-06	209.34	197.17	342	326.94	Promoter (<=1kb)	17	49993307	50190497	197191	2	76438	uc008cyr.1	0	ENSMUSG00000039316	Rftn1	raftlin lipid raft linker 1	uc008cyr.1;uc008cys.1	76438;76438	0;0
chr6	17298015	17314165	16151	*	9.15	8.87	9.38	-0.5	8e-07	6.9e-06	473.34	464.97	656	674.32	Promoter (<=1kb)	6	17306335	17341328	34994	1	12389	uc009azo.2	0	ENSMUSG00000007655	Cav1	caveolin 1, caveolae protein	uc009azo.2;uc009azp.2	12389;12389	0;0
chr16	81189918	81203998	14081	*	8.8	8.5	9.05	-0.56	8.19e-07	7.06e-06	358.67	362.95	534	528.37	Promoter (<=1kb)	16	81200697	81597805	397109	1	17968	uc007zta.2	0	ENSMUSG00000022762	Ncam2	neural cell adhesion molecule 2	uc007zta.2;uc007ztb.3	17968;17968	0;0
chr13	57905340	57911542	6203	*	7.97	7.55	8.29	-0.74	8.26e-07	7.11e-06	192	183.44	322	305.54	Promoter (<=1kb)	13	57421195	57908332	487138	2	20745	uc007qtc.2	0	ENSMUSG00000056222	Spock1	sparc/osteonectin, cwcv and kazal-like domains proteoglycan 1	uc007qtc.2;uc057kqe.1;uc011zak.1;uc057kqf.1;uc057kqg.1;uc007qte.2	20745;20745;20745;20745;20745;20745	0;0;0;0;0;0
chr4	65114256	65139589	25334	*	9.68	9.44	9.88	-0.44	8.27e-07	7.11e-06	683.35	710.21	905	985.7	Promoter (<=1kb)	4	65124174	65357509	233336	1	18491	uc008thm.1	0	ENSMUSG00000028370	Pappa	pregnancy-associated plasma protein A	uc008thm.1;uc012dgb.1	18491;18491	0;0
chr19	4463387	4479334	15948	*	8.96	8.66	9.2	-0.54	8.3e-07	7.14e-06	403.34	405.13	562	614.97	Promoter (<=1kb)	19	4445908	4477143	31236	2	171180	uc008gad.1	0	ENSMUSG00000049303	Syt12	synaptotagmin XII	uc008gad.1	171180	0
chr17	71161694	71188539	26846	*	9.93	9.71	10.12	-0.41	8.34e-07	7.16e-06	852.02	824	1139	1082.03	Promoter (<=1kb)	17	71182560	71235119	52560	1	64898	uc008dmb.1	0	ENSMUSG00000024052	Lpin2	lipin 2	uc008dmb.1;uc008dmc.1;uc012awp.1	64898;64898;64898	0;0;0
chr17	18517285	18526934	9650	*	8.01	8.33	7.59	0.74	8.39e-07	7.2e-06	338.67	305.08	192	193.64	Distal Intergenic	17	18581727	18598157	16431	1	433070	uc009vbb.1	-54793	ENSMUSG00000091679	Vmn2r96	vomeronasal 2, receptor 96	NA	NA	NA
chr19	28676377	28691066	14690	*	9.07	8.8	9.31	-0.51	8.4e-07	7.2e-06	443.34	445.35	628	639.29	Promoter (<=1kb)	19	28258851	28680077	421227	2	226075	uc008hci.2	0	ENSMUSG00000052942	Glis3	GLIS family zinc finger 3	uc008hci.2;uc008hcj.2;uc008hck.1;uc029trx.1	226075;226075;320176;320176	0;0;0;0
chr19	5443629	5460183	16555	*	9.13	8.86	9.36	-0.5	8.43e-07	7.23e-06	456.68	472.82	660	656.81	Promoter (<=1kb)	19	5447698	5455938	8241	1	14283	uc008gdc.1	0	ENSMUSG00000024912	Fosl1	fos-like antigen 1	uc008gdk.3;uc008gdc.1;uc008gdd.3;uc012bgx.2;uc008gde.2;uc008gdf.2;uc008gdg.2;uc008gdh.2;uc008gdi.1;uc008gdj.1	13041;14283;240514;240514;58249;58249;58249;58249;58249;58249	0;0;0;0;-424;-424;-424;-424;-2284;-2988
chr6	99505572	99538140	32569	*	10.02	9.8	10.2	-0.4	8.46e-07	7.25e-06	885.35	900.52	1133	1221.18	Promoter (<=1kb)	6	98925342	99520993	595652	2	108655	uc012epq.1	0	ENSMUSG00000030067	Foxp1	forkhead box P1	uc012epq.1	108655	0
chr1_GL456211_random	110882	176147	65266	*	10.41	10.58	10.22	0.36	8.49e-07	7.27e-06	1552.7	1513.61	1156	1234.8	Promoter (<=1kb)	24	145347	165925	20579	2	100041034	uc029ttw.2	0	NA	LOC100041034	Sp110 nuclear body protein pseudogene	uc029ttw.2;uc008idg.2	100041034;100041034	0;0
chr9	107701213	107722440	21228	*	9.36	9.1	9.58	-0.48	8.61e-07	7.36e-06	560.68	537.56	741	790.12	Promoter (<=1kb)	9	107681502	107705591	24090	2	20350	uc009rms.1	0	ENSMUSG00000034684	Sema3f	sema domain, immunoglobulin domain (Ig), short basic domain, secreted, (semaphorin) 3F	uc009rms.1;uc009rmt.1;uc009rmu.1	20350;20350;20350	0;0;0
chr15	95516172	95534146	17975	*	9.34	9.08	9.57	-0.49	8.68e-07	7.42e-06	556.68	524.81	729	787.2	Promoter (<=1kb)	15	95075230	95528559	453330	2	54003	uc056zad.1	0	ENSMUSG00000022454	Nell2	NEL-like 2	uc056zad.1;uc007xjq.2	54003;54003	0;0
chr18	46187424	46218004	30581	*	10.07	9.85	10.25	-0.4	8.71e-07	7.43e-06	888.69	958.39	1174	1264.96	Promoter (<=1kb)	18	46165300	46198818	33519	2	28105	uc012bcp.1	0	ENSMUSG00000033949	Trim36	tripartite motif-containing 36	uc012bcp.1;uc008evi.2	28105;28105	0;0
chr15	100859686	100878544	18859	*	9.18	8.9	9.41	-0.51	8.75e-07	7.46e-06	500.01	454.18	669	692.81	Promoter (<=1kb)	15	100869858	100936600	66743	1	20273	uc007xsf.1	0	ENSMUSG00000023033	Scn8a	sodium channel, voltage-gated, type VIII, alpha	uc007xsf.1;uc011zzp.1;uc007xsg.2;uc007xsh.2;uc007xsi.1	20273;20273;20273;20273;20273	0;0;0;0;0
chr17	33987620	34007995	20376	*	9.57	9.32	9.78	-0.46	8.78e-07	7.48e-06	637.35	644.49	834	926.34	Promoter (<=1kb)	17	33996012	34000333	4322	2	14972	uc008cap.1	0	ENSMUSG00000061232	H2-K1	histocompatibility 2, K1, K region	uc008cap.1;uc012apq.1;uc033hct.1;uc008car.2;uc008caq.2;uc008cao.1	14972;14972;14972;14972;14972;433100	0;0;0;0;0;0
chr1	165830926	165853069	22144	*	9.56	9.31	9.78	-0.48	8.8e-07	7.5e-06	647.35	619.96	821	940.94	Intron (uc007djn.2/12503, intron 1 of 7)	1	165788681	165862112	73432	1	12503	uc007djn.2	42245	ENSMUSG00000005763	Cd247	CD247 antigen	uc007djn.2;uc007djo.2;uc007djp.2;uc007djq.2;uc007djr.2	12503;12503;12503;12503;12503	0;0;0;0;0
chr16	43974250	43984475	10226	*	8.78	8.47	9.03	-0.56	8.89e-07	7.56e-06	352.01	357.07	525	520.58	Promoter (<=1kb)	16	43969146	43979077	9932	2	332175	uc007zgp.1	0	ENSMUSG00000036304	Zdhhc23	zinc finger, DHHC domain containing 23	uc007zgt.2;uc012afw.1;uc007zgp.1;uc007zgq.1;uc012afu.1;uc012afv.1;uc057bij.1;uc007zgr.1	207798;207798;332175;332175;332175;332175;332175;332175	0;0;0;0;0;0;0;0
chr5	120693212	120696981	3770	*	7.59	7.1	7.95	-0.85	8.89e-07	7.56e-06	130.67	144.2	236	257.86	Promoter (<=1kb)	5	120680264	120695403	15140	2	14357	uc008zht.1	0	ENSMUSG00000029603	Dtx1	deltex 1, E3 ubiquitin ligase	uc008zht.1;uc008zhu.1	14357;14357	0;0
chr4	147321290	147354850	33561	*	10.38	10.55	10.19	0.36	8.97e-07	7.62e-06	1536.04	1468.49	1206	1129.71	Exon (uc008vsv.4/uc008vsv.4, exon 3 of 5)	4	147175847	147513420	337574	1	195531	uc008vsu.3	145443	ENSMUSG00000078496	Zfp982	zinc finger protein 982	uc008vsu.3;uc029vau.1	195531;195531	0;0
chr3	143098964	143110536	11573	*	8.68	8.34	8.95	-0.62	9e-07	7.64e-06	326.67	320.77	453	539.07	Distal Intergenic	3	143243055	143257996	14942	1	320072	uc008rpi.2	-132519	ENSMUSG00000105923	A830019L24Rik	RIKEN cDNA A830019L24 gene	NA	NA	NA
chr3	88015229	88039743	24515	*	9.82	9.59	10.01	-0.43	9.04e-07	7.66e-06	783.35	756.32	989	1080.08	Promoter (<=1kb)	3	88021750	88027511	5762	2	73940	uc008ptq.2	0	ENSMUSG00000004894	Hapln2	hyaluronan and proteoglycan link protein 2	uc008ptr.3;uc008pts.3;uc012crm.2;uc033hut.1;uc008ptq.2	66614;66614;66614;66614;73940	-3363;-3363;-3363;-3363;0
chr18	60907358	60916503	9146	*	8.35	7.98	8.64	-0.65	9.22e-07	7.81e-06	260.01	246.22	387	408.68	Promoter (<=1kb)	18	60912240	60917768	5529	1	545260	uc008fbe.1	0	ENSMUSG00000036412	Arsi	arylsulfatase i	uc008fbe.1	545260	0
chr9	72796163	72816930	20768	*	9.45	9.2	9.66	-0.46	9.29e-07	7.87e-06	573.35	602.31	799	815.41	Promoter (<=1kb)	9	72807274	72917307	110034	1	235472	uc009qqh.1	0	ENSMUSG00000036030	Prtg	protogenin	uc009qqh.1	235472	0
chr10	40555319	40566323	11005	*	8.1	8.43	7.67	0.76	9.31e-07	7.88e-06	346.67	345.3	233	175.15	Distal Intergenic	10	40570362	40604132	33771	1	70840	uc007ewz.1	-4039	ENSMUSG00000019834	Slc22a16	solute carrier family 22 (organic cation transporter), member 16	uc007ewz.1	70840	-4039
chr1	132060796	132071365	10570	*	8.91	8.61	9.16	-0.54	9.47e-07	8e-06	392.68	390.42	549	592.59	Promoter (<=1kb)	1	132022811	132068062	45252	2	213006	uc011wrr.1	0	ENSMUSG00000059149	Mfsd4a	major facilitator superfamily domain containing 4A	uc011wrr.1;uc007coe.2;uc007cof.2;uc011wrs.1;uc007cog.2;uc011wru.1	213006;213006;213006;213006;213006;213006	0;0;0;0;0;0
chr1	192768059	192792648	24590	*	9.39	9.14	9.61	-0.46	9.49e-07	8.02e-06	554.68	576.8	779	780.39	Promoter (<=1kb)	1	192512828	192771219	258392	2	226861	uc007edp.2	0	ENSMUSG00000037375	Hhat	hedgehog acyltransferase	uc007edp.2;uc007edq.2	226861;226861	0;0
chr13	98489265	98538293	49029	*	10.55	10.37	10.71	-0.34	9.5e-07	8.02e-06	1349.36	1299.77	1655	1697.97	Distal Intergenic	13	98424110	98435065	10956	2	70090	uc029scu.1	-54200	ENSMUSG00000099446	2310005E17Rik	RIKEN cDNA 2310005E17 gene	NA	NA	NA
chrX	168794204	168798803	4600	*	7.14	6.56	7.56	-1	9.54e-07	8.05e-06	100	88.29	181	195.58	Promoter (<=1kb)	20	168795099	169304440	509342	1	11856	uc009uxj.2	0	ENSMUSG00000031355	Arhgap6	Rho GTPase activating protein 6	uc009uxj.2;uc009uxk.2	11856;11856	0;0
chr2	18756334	18808908	52575	*	10.72	10.53	10.89	-0.35	9.58e-07	8.08e-06	1443.37	1523.42	1789	2002.53	Promoter (<=1kb)	2	18742709	18760862	18154	2	100041479	uc056zld.1	0	ENSMUSG00000092353	Gm3363	predicted gene 3363	uc056zld.1;uc057bmo.2	100041479;66774	0;0
chr4	3454809	3464350	9542	*	7.97	8.29	7.55	0.74	9.63e-07	8.11e-06	306.01	321.75	181	193.64	Distal Intergenic	4	3537090	3537191	102	1	100499523	uc056zuz.1	-72740	ENSMUSG00000094253	Mir3471-2	microRNA 3471-2	NA	NA	NA
chr3	93753987	93873026	119040	*	12.26	12.35	12.16	0.19	9.64e-07	8.12e-06	5243.45	5207.89	4553	4577.22	Promoter (<=1kb)	3	93826020	93827117	1098	1	399674	uc008qfo.1	0	ENSMUSG00000058005	Tdpoz3	TD and POZ domain containing 3	uc008qfo.1;uc008qfn.1	399674;399675	0;0
chr9	100540178	100601382	61205	*	10.96	10.81	11.11	-0.3	9.67e-07	8.13e-06	1772.04	1810.84	2169	2241.9	Promoter (<=1kb)	9	100494302	100546134	51833	2	17973	uc009rex.2	0	ENSMUSG00000032475	Nck1	non-catalytic region of tyrosine kinase adaptor protein 1	uc009rex.2;uc012gze.1	17973;245020	0;0
chr8	71647987	71742929	94943	*	11.69	11.57	11.81	-0.24	9.69e-07	8.14e-06	2982.07	3083.14	3573	3588.6	Promoter (<=1kb)	8	71689252	71690577	1326	1	16336	uc009meq.2	0	ENSMUSG00000079019	Insl3	insulin-like 3	uc009meq.2;uc009mek.2;uc009mel.2;uc009mem.2;uc009men.1;uc009mep.2;uc033jgc.1;uc009mej.2;uc009mer.4;uc009mes.3;uc033jge.1;uc009meu.2	16336;16453;16453;16453;16453;16453;382018;382018;72297;72297;74015;74015	0;0;0;0;0;0;0;0;0;0;0;0
chr14	70157665	70197045	39381	*	10.15	9.94	10.33	-0.39	9.84e-07	8.26e-06	955.36	1012.35	1233	1349.62	Promoter (<=1kb)	14	70180468	70192246	11779	2	20410	uc033grv.1	0	ENSMUSG00000022091	Sorbs3	sorbin and SH3 domain containing 3	uc033grv.1;uc033grw.1;uc007unk.1;uc007unl.1;uc007unm.1;uc007unn.1;uc029slm.1;uc007uni.1;uc007unj.1;uc007unf.2;uc007ung.2;uc007unh.2	20410;20410;20410;20410;20410;20410;213019;213019;213019;219158;268759;268759	0;0;0;0;0;0;0;0;0;-3874;0;0
chr4	127984992	127993098	8107	*	8.25	7.88	8.54	-0.66	9.97e-07	8.36e-06	227.34	242.3	367	377.54	Promoter (<=1kb)	4	127988044	128339657	351614	1	329942	uc008uuy.1	0	ENSMUSG00000028804	Csmd2	CUB and Sushi multiple domains 2	uc008uuy.1;uc008uuz.1;uc033ies.1	329942;329942;329942	0;0;0
chr5	147398051	147408409	10359	*	8.62	8.29	8.89	-0.61	9.99e-07	8.37e-06	306.67	317.83	445	505.01	Promoter (<=1kb)	5	147330741	147400489	69749	2	14255	uc009aob.3	0	ENSMUSG00000042817	Flt3	FMS-like tyrosine kinase 3	uc009aob.3	14255	0
chr17	7825411	7831604	6194	*	7.91	7.49	8.23	-0.74	1.01e-06	8.43e-06	176	183.44	303	298.73	Promoter (<=1kb)	17	7788994	7827302	38309	2	68655	uc008aip.1	0	ENSMUSG00000071984	Fndc1	fibronectin type III domain containing 1	uc008aip.1	68655	0
chr13	56285922	56301412	15491	*	9.25	8.96	9.49	-0.52	1.02e-06	8.51e-06	476.01	521.87	662	772.6	Promoter (<=1kb)	13	56288643	56296551	7909	2	57266	uc007qsm.2	0	ENSMUSG00000021508	Cxcl14	chemokine (C-X-C motif) ligand 14	uc007qsm.2;uc011zab.2	57266;57266	0;0
chr19	36531584	36584925	53342	*	10.6	10.43	10.76	-0.33	1.02e-06	8.52e-06	1377.37	1384.13	1747	1720.35	Promoter (<=1kb)	19	36554639	36591147	36509	1	226098	uc008hhm.2	0	ENSMUSG00000041180	Hectd2	HECT domain E3 ubiquitin protein ligase 2	uc008hhm.2;uc008hhn.2;uc008hho.2;uc008hhp.2;uc012blc.1	226098;226098;226098;226098;226098	0;0;0;0;0
chr2	44507137	44584421	77285	*	11.32	11.18	11.45	-0.27	1.03e-06	8.61e-06	2281.39	2343.5	2740	2842.28	Promoter (<=1kb)	2	44564412	44571347	6936	2	227835	uc008joz.2	0	ENSMUSG00000036890	Gtdc1	glycosyltransferase-like domain containing 1	uc008joz.2;uc008jpa.2	227835;227835	0;0
chr11	69932929	69942021	9093	*	8.46	8.11	8.75	-0.64	1.04e-06	8.66e-06	266.67	285.46	400	460.25	Promoter (<=1kb)	11	69935899	69941599	5701	1	53422	uc007jsw.1	0	ENSMUSG00000018554	Ybx2	Y box protein 2	uc007jsy.1;uc007jsz.1;uc007jta.1;uc007jsw.1;uc057kll.1;uc057klm.1;uc007jsx.1	20528;20528;20528;53422;53422;53422;53422	0;0;0;0;0;0;0
chr9	81621644	81639254	17611	*	9.29	9.03	9.51	-0.48	1.04e-06	8.66e-06	520.01	527.75	707	755.09	Promoter (<=1kb)	9	81631392	81632552	1161	2	15551	uc009qvl.1	0	ENSMUSG00000049511	Htr1b	5-hydroxytryptamine (serotonin) receptor 1B	uc009qvl.1;uc009qvm.2;uc009qvn.2;uc029xfa.1;uc009qvo.1;uc029xfb.1	15551;319405;319405;319405;319405;319405	0;0;0;0;0;0
chr5	72498197	72508642	10446	*	8.65	8.32	8.91	-0.59	1.04e-06	8.7e-06	329.34	311.94	471	493.34	Promoter (<=1kb)	5	72300025	72504208	204184	2	53419	uc008xrj.2	0	ENSMUSG00000005220	Corin	corin	uc008xrl.1;uc012dwy.1;uc008xrj.2;uc012dwx.1;uc008xrk.2	100978;100978;53419;53419;53419	51003;51003;0;0;0
chr14	30344528	30359292	14765	*	9.03	8.74	9.28	-0.55	1.05e-06	8.72e-06	418.01	434.56	574	671.4	Promoter (<=1kb)	14	30039941	30353486	313546	2	12289	uc007suu.2	0	ENSMUSG00000015968	Cacna1d	calcium channel, voltage-dependent, L type, alpha 1D subunit	uc007suu.2;uc007suw.2;uc056ywb.1;uc007sux.2;uc007suy.1	12289;12289;12289;12289;12289	0;0;0;0;0
chr1	152921974	152963845	41872	*	10.6	10.42	10.77	-0.34	1.06e-06	8.78e-06	1402.7	1343.91	1687	1795.27	Promoter (<=1kb)	1	152955101	153119261	164161	1	226518	uc007czq.1	0	ENSMUSG00000042751	Nmnat2	nicotinamide nucleotide adenylyltransferase 2	uc007czq.1;uc011wts.1	226518;226518	0;0
chr18	11829030	11844624	15595	*	9.09	8.77	9.35	-0.58	1.1e-06	9.14e-06	468.01	407.1	594	710.33	Promoter (<=1kb)	18	11840361	11840438	78	2	100316686	uc012azj.1	0	ENSMUSG00000084565	Mir1901	microRNA 1901	uc012azj.1;uc008ebq.1;uc008ebr.2;uc012azi.1	100316686;621998;63955;63955	0;0;0;0
chr9	95740030	95759062	19033	*	9.46	9.22	9.67	-0.46	1.1e-06	9.15e-06	597.35	594.46	794	839.74	Promoter (<=1kb)	9	95705067	95750358	45292	2	22063	uc009rbh.2	0	ENSMUSG00000032839	Trpc1	transient receptor potential cation channel, subfamily C, member 1	uc009rbk.2;uc009rbh.2;uc009rbi.2;uc009rbj.2;uc012gyl.2	102502;22063;22063;22063;22063	0;0;0;0;0
chr4	114809706	114854998	45293	*	10.49	10.27	10.67	-0.39	1.1e-06	9.18e-06	1255.36	1222.27	1499	1758.3	Promoter (<=1kb)	4	114821720	114856166	34447	1	433746	uc012diw.1	0	ENSMUSG00000055198	Gm12830	predicted gene 12830	uc012diw.1	433746	0
chr8	125877117	126007364	130248	*	12.19	12.09	12.29	-0.2	1.13e-06	9.36e-06	4346.77	4368.19	4997	4998.55	Promoter (<=1kb)	8	125897914	125908144	10231	1	102632990	uc009nyp.1	0	NA	A730098A19Rik	RIKEN cDNA A730098A19 gene	uc009nyp.1;uc009nyr.4;uc009nyq.1;uc009nyn.2;uc009nyo.1	102632990;16525;234878;270109;270109	0;0;0;0;0
chr9	74841589	74881992	40404	*	10.98	10.64	11.26	-0.62	1.13e-06	9.36e-06	1580.04	1611.71	2229	2674.91	Promoter (<=1kb)	9	74848437	74852872	4436	1	100503019	uc009qrf.2	0	ENSMUSG00000066477	Gm16551	predicted gene 16551	uc009qrf.2;uc009qrg.3;uc009qrh.2	100503019;100503019;15379	0;0;0
chr5	115421305	115435015	13711	*	8.85	8.55	9.1	-0.55	1.14e-06	9.41e-06	356.01	393.36	532	568.26	Promoter (<=1kb)	5	115429685	115448987	19303	1	17690	uc008zdu.1	0	ENSMUSG00000054256	Msi1	musashi RNA-binding protein 1	uc008zdu.1;uc008zdv.1	17690;17690	0;0
chr9	51073037	51112933	39897	*	10.28	10.08	10.45	-0.36	1.14e-06	9.43e-06	1077.36	1094.75	1366	1422.6	Promoter (<=1kb)	9	51081313	51102078	20766	2	235345	uc009plc.1	0	ENSMUSG00000032057	4833427G06Rik	RIKEN cDNA 4833427G06 gene	uc009plc.1;uc012gtc.1;uc009pld.1;uc009ple.1;uc009plf.1;uc012gte.1;uc012gtd.1	235345;244864;56057;56057;56057;723849;723932	0;0;0;-3068;-3068;0;0
chr14	65951455	65957075	5621	*	7.97	7.56	8.29	-0.73	1.14e-06	9.46e-06	189.34	188.34	305	320.13	Promoter (<=1kb)	14	65919395	65953744	34350	2	219151	uc007ujr.1	0	ENSMUSG00000034463	Scara3	scavenger receptor class A, member 3	uc007ujr.1	219151	0
chr7	112424315	112429957	5643	*	7.88	7.45	8.2	-0.75	1.14e-06	9.46e-06	179.34	170.69	294	295.81	Promoter (<=1kb)	7	112427706	112591688	163983	1	57342	uc009jgt.1	0	ENSMUSG00000030770	Parva	parvin, alpha	uc009jgt.1	57342	0
chr10	71144066	71166918	22853	*	9.68	9.45	9.87	-0.42	1.17e-06	9.65e-06	702.68	697.46	927	949.7	Promoter (<=1kb)	10	70925086	71146860	221775	2	83675	uc033fpy.2	0	ENSMUSG00000014329	Bicc1	BicC family RNA binding protein 1	uc007foj.2;uc007fok.2;uc033fpy.2;uc007fog.3;uc007foh.3;uc057kja.1	319572;319572;83675;83675;83675;83675	15122;15122;0;0;0;0
chr5	136562474	136586520	24047	*	9.62	9.39	9.82	-0.43	1.22e-06	1.01e-05	682.02	661.16	904	905.91	Promoter (<=1kb)	5	136248135	136565981	317847	2	13047	uc009aaj.2	0	ENSMUSG00000029705	Cux1	cut-like homeobox 1	uc009aaj.2;uc009aak.2;uc009aal.2;uc009aam.2;uc009aaq.2;uc009aar.2;uc009aas.2;uc009aat.2	13047;13047;13047;13047;13047;13047;13047;13047	0;0;0;0;0;0;0;0
chr2	162642906	162674131	31226	*	9.95	9.73	10.14	-0.4	1.24e-06	1.02e-05	870.02	832.83	1090	1158.9	Promoter (<=1kb)	2	161521988	162661147	1139160	2	19281	uc008nrw.2	0	ENSMUSG00000053141	Ptprt	protein tyrosine phosphatase, receptor type, T	uc008nrw.2;uc008nrx.2;uc008nry.2;uc008nrz.2;uc008nsb.1;uc012cio.1	19281;19281;19281;19281;77288;77288	0;0;0;0;0;0
chr12	107974765	107987541	12777	*	8.87	8.58	9.12	-0.54	1.24e-06	1.03e-05	382.01	382.57	548	561.45	Intron (uc007ozh.1/58208, intron 2 of 3)	12	107910403	108003414	93012	2	58208	uc007ozh.1	15873	ENSMUSG00000048251	Bcl11b	B cell leukemia/lymphoma 11B	uc007ozh.1;uc007ozi.1;uc011yrp.1	58208;58208;58208	0;0;0
chr1	34743693	34761735	18043	*	9.35	9.1	9.57	-0.47	1.25e-06	1.03e-05	541.35	554.24	734	782.33	Exon (uc007apf.1/226970, exon 3 of 13)	1	34721924	34812754	90831	1	226970	uc007apf.1	21769	ENSMUSG00000037509	Arhgef4	Rho guanine nucleotide exchange factor (GEF) 4	uc007apf.1	226970	0
chr11	104216504	104237675	21172	*	9.49	9.23	9.71	-0.48	1.25e-06	1.03e-05	582.01	617.02	776	895.2	Promoter (<=1kb)	11	104231436	104295317	63882	1	17762	uc007lwe.1	0	ENSMUSG00000018411	Mapt	microtubule-associated protein tau	uc007lwe.1;uc007lwf.3;uc007lwg.3;uc007lwh.3;uc007lwi.3;uc011yga.3	17762;17762;17762;17762;17762;17762	0;0;0;0;0;0
chr11	103646909	103660823	13915	*	9.14	8.86	9.37	-0.51	1.26e-06	1.04e-05	469.34	463.01	629	697.68	Promoter (<=1kb)	11	103649509	103650580	1072	1	104582	uc007lvn.1	0	ENSMUSG00000046215	Rprml	reprimo-like	uc007lvn.1;uc007lvm.2;uc056yos.1	104582;78629;78629	0;0;0
chr1	165694061	165710858	16798	*	9.24	8.98	9.47	-0.49	1.27e-06	1.05e-05	518.68	491.46	697	717.14	Promoter (<=1kb)	1	165648945	165708094	59150	2	226594	uc007djj.1	0	ENSMUSG00000040723	Rcsd1	RCSD domain containing 1	uc007djj.1;uc007djk.1	226594;226594	0;0
chr6	85407375	85410320	2946	*	7.32	6.76	7.73	-0.97	1.31e-06	1.07e-05	118.67	98.1	191	232.56	Distal Intergenic	6	85423886	85428877	4992	1	384452	uc009cpp.2	-13566	ENSMUSG00000068302	Noto	notochord homeobox	NA	NA	NA
chr4	114390272	114414179	23908	*	9.42	9.16	9.63	-0.47	1.31e-06	1.07e-05	582.01	564.05	756	830.98	Promoter (<=1kb)	4	114406724	114615098	208375	1	666048	uc008ueb.1	0	ENSMUSG00000070867	Trabd2b	TraB domain containing 2B	uc008ueb.1	666048	0
chr1	195262782	195275276	12495	*	8.25	8.55	7.87	0.68	1.32e-06	1.08e-05	388.01	360.01	249	218.94	Distal Intergenic	1	195136811	195176715	39905	2	12902	uc011wzi.1	-86067	ENSMUSG00000026616	Cr2	complement receptor 2	NA	NA	NA
chr1	23756383	23772596	16214	*	9.24	8.96	9.48	-0.52	1.32e-06	1.08e-05	526.68	469.88	671	758	Promoter (<=1kb)	1	23761926	23815740	53815	1	280645	uc007amd.1	0	ENSMUSG00000026156	B3gat2	beta-1,3-glucuronyltransferase 2 (glucuronosyltransferase S)	uc007amd.1;uc007ame.2	280645;280645	0;0
chr7	79040953	79059872	18920	*	9.41	9.16	9.63	-0.47	1.33e-06	1.09e-05	585.35	555.22	754	830.01	Promoter (<=1kb)	7	79018053	79053323	35271	2	102633600	uc057cah.1	0	ENSMUSG00000097441	Gm26633	predicted gene, 26633	uc057cah.1;uc009hxw.1	102633600;11595	0;0
chr11	77511660	77534664	23005	*	9.55	9.31	9.76	-0.44	1.33e-06	1.09e-05	642.01	629.77	835	895.2	Promoter (<=1kb)	11	77508099	77513273	5175	2	216964	uc007kgz.1	0	ENSMUSG00000044328	Trp53i13	transformation related protein 53 inducible protein 13	uc007kgy.1;uc007kgz.1;uc007khc.1;uc007kha.1	216963;216964;216965;67477	18248;0;0;0
chr10	29525017	29565140	40124	*	10.28	10.09	10.46	-0.37	1.33e-06	1.09e-05	1102.69	1078.07	1357	1452.76	Promoter (<=1kb)	10	29453106	29535867	82762	2	72780	uc007etb.3	0	ENSMUSG00000019880	Rspo3	R-spondin 3	uc007etb.3	72780	0
chr11	119014647	119024909	10263	*	8.33	7.96	8.61	-0.65	1.35e-06	1.1e-05	260.67	238.37	384	399.92	Promoter (<=1kb)	11	119023021	119031275	8255	1	12416	uc007mpt.2	0	ENSMUSG00000025577	Cbx2	chromobox 2	uc007mpt.2	12416	0
chr3	152660244	152673949	13706	*	8.96	8.68	9.2	-0.52	1.37e-06	1.12e-05	406.01	412.98	573	603.29	Promoter (<=1kb)	3	152462815	152668140	205326	2	229949	uc008rtq.1	0	ENSMUSG00000039058	Ak5	adenylate kinase 5	uc008rtq.1;uc029upf.1	229949;99542	0;0
chr10	128922071	128953135	31065	*	9.83	9.61	10.02	-0.42	1.37e-06	1.12e-05	786.02	772.01	1086	993.48	Promoter (<=1kb)	10	128919914	128923524	3611	2	14533	uc007hoz.1	0	ENSMUSG00000090247	Bloc1s1	biogenesis of lysosomal organelles complex-1, subunit 1	uc007hoz.1;uc029rjw.1;uc007hpa.2;uc007hpb.2;uc007hpc.2;uc007how.2;uc007hox.2;uc007hoy.1	14533;14533;16404;16404;16404;19682;19682;19682	0;0;0;0;-308;-2774;-2774;-2774
chr7	100174084	100196309	22226	*	9.51	9.27	9.71	-0.44	1.38e-06	1.13e-05	606.68	629.77	830	848.5	Promoter (<=1kb)	7	100176670	100184869	8200	1	57442	uc009imm.2	0	ENSMUSG00000035165	Kcne3	potassium voltage-gated channel, Isk-related subfamily, gene 3	uc009imm.2;uc009imn.2;uc009imo.2;uc009imp.2;uc012fpy.1;uc029wng.1	57442;57442;57442;57442;57442;57442	0;0;0;0;0;0
chr10	123260774	123277652	16879	*	9.25	8.98	9.48	-0.51	1.4e-06	1.14e-05	508.01	500.29	664	767.74	Promoter (<=1kb)	10	123264076	123741204	477129	1	268354	uc007hgu.2	0	ENSMUSG00000044071	Fam19a2	family with sequence similarity 19, member A2	uc007hgu.2;uc007hgv.2;uc007hgw.2	268354;268354;268354	0;0;0
chr15	82959723	82969182	9460	*	8.25	7.87	8.56	-0.69	1.4e-06	1.14e-05	252.67	214.83	366	386.3	Promoter (<=1kb)	15	82959218	82959296	79	2	100526477	uc056yzs.1	-427	ENSMUSG00000092751	Mir3080	microRNA 3080	uc056yzs.1	100526477	-427
chr11	78776232	78826104	49873	*	10.61	10.44	10.76	-0.33	1.43e-06	1.16e-05	1376.03	1394.92	1710	1761.22	Promoter (<=1kb)	11	78826595	78843899	17305	1	66274	uc007kkb.2	-491	ENSMUSG00000072640	Lyrm9	LYR motif containing 9	uc007kkb.2	66274	-491
chr16	21240076	21254808	14733	*	9.15	8.88	9.37	-0.49	1.43e-06	1.16e-05	470.68	472.82	665	659.73	Exon (uc007yri.1/328646, exon 4 of 5)	16	21247499	21296872	49374	2	328646	uc007yri.1	42064	ENSMUSG00000096918	Gm16863	predicted gene, 16863	uc033gyl.1;uc007yri.1	102465781;328646	1258;0
chr2	93943120	93961516	18397	*	9.37	9.1	9.59	-0.49	1.43e-06	1.17e-05	566.68	534.62	725	818.33	Promoter (<=1kb)	2	93955810	93957100	1291	2	620695	uc012bzx.1	0	ENSMUSG00000087006	Gm13889	predicted gene 13889	uc012bzx.1	620695	0
chr7	27981739	27997087	15349	*	8.73	8.98	8.42	0.56	1.44e-06	1.17e-05	513.35	496.36	340	343.49	3' UTR	7	27984471	28014115	29645	2	100043772	uc029wed.1	17028	ENSMUSG00000096916	Zfp850	zinc finger protein 850	uc029wed.1;uc009fxl.3;uc009fxm.1	100043772;338354;338354	0;-2582;-2582
chr13	35944019	35974795	30777	*	9.99	9.79	10.17	-0.38	1.45e-06	1.17e-05	884.02	886.78	1166	1142.36	Promoter (<=1kb)	13	35967906	35970388	2483	1	76487	uc007qci.2	0	ENSMUSG00000050423	Ppp1r3g	protein phosphatase 1, regulatory subunit 3G	uc007qcj.1;uc007qci.2	380840;76487	142562;0
chr4	8685087	8697383	12297	*	8.71	8.39	8.98	-0.59	1.46e-06	1.18e-05	317.34	353.14	472	535.18	Promoter (<=1kb)	4	8690406	8755906	65501	1	320790	uc008rxy.1	0	ENSMUSG00000041235	Chd7	chromodomain helicase DNA binding protein 7	uc008rxy.1;uc008rxz.2;uc008ryb.1	320790;320790;320790	0;0;0
chr15	85657696	85678781	21086	*	9.44	9.18	9.65	-0.47	1.46e-06	1.18e-05	562.01	600.34	763	844.61	Exon (uc007xdi.1/uc007xdi.1, exon 2 of 2)	15	85703773	85707524	3752	1	102800312	uc056yzv.1	-24992	NA	Lncppara	long noncoding RNA near Ppara	NA	NA	NA
chr13	34338812	34351860	13049	*	8.89	8.59	9.14	-0.54	1.48e-06	1.2e-05	388.68	383.55	534	591.61	Promoter (<=1kb)	13	34179158	34345182	166025	2	73102	uc007qbh.1	0	ENSMUSG00000038267	Slc22a23	solute carrier family 22, member 23	uc007qbh.1	73102	0
chr3	108212945	108250312	37368	*	10.29	10.1	10.45	-0.36	1.48e-06	1.2e-05	1078.02	1112.4	1371	1435.25	Promoter (<=1kb)	3	108212266	108226599	14334	2	17306	uc008qyn.1	0	ENSMUSG00000027887	Sypl2	synaptophysin-like 2	uc008qyn.1;uc008qyo.1;uc008qyl.2;uc008qym.2	17306;17306;72522;72522	0;0;-2418;-2418
chr6	121387028	121426128	39101	*	10.21	10.02	10.38	-0.36	1.5e-06	1.21e-05	1027.36	1047.66	1337	1325.29	5' UTR	6	121372927	121473678	100752	2	243621	uc009dom.3	47550	ENSMUSG00000040797	Iqsec3	IQ motif and Sec7 domain 3	uc009dom.3;uc009don.3;uc009doo.3;uc009dop.1	243621;243621;243621;243621	0;0;0;0
chr19	41204876	41210788	5913	*	8.09	7.71	8.4	-0.69	1.5e-06	1.21e-05	199.34	218.75	332	342.51	Promoter (<=1kb)	19	41083981	41206774	122794	2	24087	uc008hlr.1	0	ENSMUSG00000025013	Tll2	tolloid-like 2	uc008hls.1;uc008hlt.1;uc008hlr.1;uc012blr.1	107358;107358;24087;24087	53216;53216;0;0
chr11	108921769	108924824	3056	*	7.2	6.56	7.64	-1.08	1.5e-06	1.21e-05	112.67	76.51	177	221.86	Promoter (1-2kb)	11	108920349	108950783	30435	1	12006	uc007mbu.3	1420	ENSMUSG00000000142	Axin2	axin 2	uc007mbu.3	12006	0
chr11	50839861	50860299	20439	*	9.38	9.13	9.6	-0.47	1.52e-06	1.22e-05	578.68	538.54	749	800.82	Promoter (<=1kb)	11	50850685	50852433	1749	1	108072	uc007iss.1	0	ENSMUSG00000000617	Grm6	glutamate receptor, metabotropic 6	uc007iss.1;uc007isu.2;uc007isv.1;uc007isr.2;uc011xui.2	108072;108072;108072;214779;214779	0;0;0;0;0
chr16	88281868	88295950	14083	*	9.02	8.72	9.27	-0.54	1.52e-06	1.22e-05	426.01	419.85	566	667.51	Promoter (<=1kb)	16	87895897	88290258	394362	2	14805	uc007zur.2	0	ENSMUSG00000022935	Grik1	glutamate receptor, ionotropic, kainate 1	uc007zur.2;uc007zus.2;uc007zuv.3;uc007zuw.2;uc007zux.2	14805;14805;14805;14805;14805	0;0;0;0;0
chr2	59316756	59323025	6270	*	7.61	7.97	7.13	0.84	1.53e-06	1.23e-05	266.01	234.45	147	133.31	3' UTR	2	59160850	59338910	178061	1	227937	uc008jsz.1	155906	ENSMUSG00000026991	Pkp4	plakophilin 4	uc008jsz.1;uc008jta.1;uc008jtb.1;uc008jtc.1;uc008jtd.1;uc008jtf.1;uc008jtg.1	227937;227937;227937;227937;227937;227937;227937	0;0;0;0;0;0;0
chr17	79709657	79716723	7067	*	7.9	7.46	8.24	-0.78	1.57e-06	1.26e-05	192.67	159.9	286	318.19	Promoter (<=1kb)	17	79706894	79715041	8148	2	13078	uc008dqb.1	0	ENSMUSG00000024087	Cyp1b1	cytochrome P450, family 1, subfamily b, polypeptide 1	uc008dqb.1;uc008dqc.1	13078;13078	0;0
[truncated: 9,540 more rows]

## Sheet: D0_H33K27me3
seqnames	start	end	width	strand	Conc	Conc_H33_K27me3	Conc_H31_K27me3	Fold	p.value	FDR	S01	S02	S05	S06	annotation	geneChr	geneStart	geneEnd	geneLength	geneStrand	geneId	transcriptId	distanceToTSS	ENSEMBL	SYMBOL	GENENAME	flank_txIds	flank_geneIds	flank_gene_distances
[truncated: 2,628 more rows]

[truncated: 1 more sheets: D0_H3K27me3]
