# Supplementary material for: Multi-omic profiling of histone variant H3.3 lysine 27 methylation reveals a distinct role from canonical H3 in stem cell differentiation
Source: Royal Society of Chemistry journal article supplement (doi:10.1039/d1mo00352f), 2022-01-12
Supplement: d1mo00352f7.xlsx [file d1mo00352f7.xlsx]

## Sheet: report_full_d6_k27me3_annotated
seqnames	start	end	width	strand	Conc	Conc_H33_K27me3	Conc_H31_K27me3	Fold	p.value	FDR	S09	S10	S13	S14	annotation	geneChr	geneStart	geneEnd	geneLength	geneStrand	geneId	transcriptId	distanceToTSS	ENSEMBL	SYMBOL	GENENAME	flank_txIds	flank_geneIds	flank_gene_distances
chr11	119033630	119064793	31164	*	9.7	8.85	10.23	-1.37	3.41e-46	4.42e-42	458	467.36	1264.66	1129.66	Promoter (<=1kb)	11	119038436	119040913	2478	2	30951	uc007mpu.1	0	ENSMUSG00000025578	Cbx8	chromobox 8	uc007mpt.2;uc007mpu.1	12416;30951	10609;0
chr7	131536317	131559379	23063	*	9.35	8.43	9.9	-1.47	3.26e-45	2.11e-41	353	339.17	995.44	915.66	Promoter (<=1kb)	7	131548773	131556582	7810	1	15372	uc057lvl.1	0	ENSMUSG00000050100	Hmx2	H6 homeobox 2	uc009kbq.2;uc057cbe.1;uc057lvl.1;uc009kbp.1;uc009kbo.3	12237;12237;15372;15372;15373	-991;-1115;0;0;0
chr19	44709474	44767328	57855	*	10.2	9.56	10.64	-1.08	1.11e-40	4.8e-37	768	742.43	1664.6	1526.31	Promoter (<=1kb)	19	44757394	44837871	80478	1	18504	uc008hqa.3	0	ENSMUSG00000004231	Pax2	paired box 2	uc008hqa.3	18504	0
chr4	152114417	152162244	47828	*	9.91	9.21	10.38	-1.17	1.1e-39	3.57e-36	589	594.66	1405.91	1265.89	Promoter (<=1kb)	4	152158867	152162469	3603	1	15206	uc008vzw.1	0	ENSMUSG00000028940	Hes2	hes family bHLH transcription factor 2	uc008vzw.1;uc056zyp.1;uc008vzg.2;uc008vzi.3;uc008vzh.2;uc008vzj.2;uc008vzm.1;uc008vzn.1;uc008vzo.1;uc008vzp.1;uc008vzq.1;uc008vzr.1;uc008vzs.1;uc008vzt.1;uc008vzu.1;uc008vzv.1;uc056zyo.1;uc008vzk.2	15206;15206;269608;269608;269608;269608;56226;56226;56226;56226;56226;56226;56226;56226;56226;56226;85030;85030	0;0;0;0;0;0;0;0;0;0;0;0;0;0;0;0;0;0
chr8	70475145	70515091	39947	*	10.04	9.41	10.48	-1.07	2.98e-38	6.83e-35	669	688.13	1471.83	1377.41	Promoter (<=1kb)	8	70493131	70504081	10951	1	12931	uc009maj.2	0	ENSMUSG00000007888	Crlf1	cytokine receptor-like factor 1	uc009maj.2;uc009mak.1;uc009mam.1;uc029wts.1;uc009maf.1;uc009mah.2;uc012gfb.1;uc009mal.1;uc009mai.2;uc009man.2	12931;12931;22186;234378;234378;234378;234378;66462;67937;75620	0;0;0;0;0;0;0;0;0;0
chr4	139814474	139861202	46729	*	9.93	9.21	10.4	-1.19	3.17e-38	6.83e-35	576	610.68	1436.93	1267.1	Promoter (<=1kb)	4	139738081	139832968	94888	2	18509	uc008vms.1	0	ENSMUSG00000028736	Pax7	paired box 7	uc008vms.1	18509	0
chr15	102890543	103012808	122266	*	11.62	10.96	12.07	-1.11	1.1e-36	2.03e-33	2036	1939.77	4520.19	4059.3	Promoter (<=1kb)	15	102944062	102947946	3885	2	100503872	uc007xwx.3	0	ENSMUSG00000086903	Hotair	HOX transcript antisense RNA (non-protein coding)	uc007xwx.3;uc007xwy.1;uc007xww.1;uc007xwv.1;uc007xxe.1;uc007xxc.1;uc007xxd.1;uc012aaf.1;uc007xxa.1;uc007xwz.3;uc012aae.1;uc012aag.1	100503872;109663;15421;15422;15424;15425;15425;15426;15427;209448;723958;751557	0;0;0;0;-1200;0;0;0;0;0;0;-2102
chr15	98767673	98810136	42464	*	9.91	9.23	10.37	-1.14	1.83e-36	2.96e-33	597	603.56	1404.25	1245.4	Promoter (<=1kb)	15	98803782	98807925	4144	2	13199	uc007xny.1	0	ENSMUSG00000059213	Ddn	dendrin	uc007xnp.1;uc007xny.1;uc007xoa.1;uc007xnx.1;uc007xns.2;uc007xnt.2;uc007xnu.2;uc007xnv.2;uc007xnw.2	11842;13199;19082;22408;22410;22410;22410;22410;22410	-4555;0;21372;0;0;0;0;0;0
chr9	63131373	63158192	26820	*	9.47	8.66	9.99	-1.34	3.64e-36	5.23e-33	382	424.63	1090.72	948.21	Promoter (<=1kb)	9	63138164	63146980	8817	2	207667	uc009qat.2	0	ENSMUSG00000022245	Skor1	SKI family transcriptional corepressor 1	uc009qat.2;uc009qau.2;uc012guu.1;uc009qav.2	207667;207667;207667;207667	0;0;0;0
chr10	127506505	127537367	30863	*	9.36	8.58	9.87	-1.3	3.04e-34	3.93e-31	404	358.75	984.36	887.33	Promoter (<=1kb)	10	127525473	127534559	9087	2	104080	uc007hjw.1	0	ENSMUSG00000040258	Nxph4	neurexophilin 4	uc007hjw.1;uc007hju.2;uc007hjv.2;uc007hjx.2;uc007hjr.1;uc007hjs.1;uc007hjt.3	104080;108037;108037;16971;237611;237611;407790	0;0;0;83781;0;0;0
chr2	147175448	147203399	27952	*	9.29	8.49	9.8	-1.31	3.9e-34	4.59e-31	373	344.51	940.04	839.71	Promoter (<=1kb)	2	147184083	147331681	147599	1	100313531	uc012cfm.1	0	ENSMUSG00000086509	Nkx2-2os	NK2 homeobox 2, opposite strand	uc012cfm.1;uc008mst.1;uc008msu.1;uc033hqo.1	100313531;18088;18088;78068	0;0;0;0
chr16	94073872	94104525	30654	*	9.56	8.87	10.03	-1.15	4.68e-34	5.05e-31	464	473.59	1078.53	1007.89	Promoter (<=1kb)	16	94085260	94127032	41773	1	20465	uc008aae.1	0	ENSMUSG00000062713	Sim2	single-minded family bHLH transcription factor 2	uc008aae.1;uc012ais.1	20465;20465	0;0
chr5	35374986	35411497	36512	*	9.48	8.77	9.96	-1.19	1.93e-33	1.92e-30	414	460.24	1020.37	971.72	Promoter (<=1kb)	5	35389117	35392872	3756	1	15371	uc008xds.1	0	ENSMUSG00000067438	Hmx1	H6 homeobox 1	uc008xds.1;uc008xdr.1	15371;442795	0;0
chr19	45213467	45252090	38624	*	9.69	8.97	10.17	-1.2	2.29e-33	2.12e-30	493	511.87	1235.3	1065.76	Promoter (<=1kb)	19	45233728	45235236	1509	2	16814	uc008hqv.1	0	ENSMUSG00000025216	Lbx1	ladybird homeobox 1	uc008hqv.1	16814	0
chr8	84892454	85016017	123564	*	11.34	10.97	11.64	-0.67	1.46e-32	1.26e-29	1955	2051.04	3273.81	3087.58	Promoter (<=1kb)	8	84913335	84914512	1178	1	100503676	uc009mob.2	0	ENSMUSG00000003812	Gm38426	predicted gene, 38426	uc009mob.2;uc009moc.2;uc009moa.1;uc012ghn.2;uc009mnz.2;uc009moq.2;uc009mor.2;uc009mos.2;uc009mot.2;uc009mov.2;uc009mow.4;uc009mom.3;uc057cch.2;uc009mon.1;uc009mog.1;uc009moh.1;uc009moi.1;uc009moj.1;uc009mnx.2;uc009mny.2;uc009mox.1;uc009mod.1;uc009moe.1;uc009mof.1;uc009mok.1;uc009mol.1	100503676;100503676;13423;16477;16596;170833;170833;170833;170833;212989;212989;21672;21672;21672;234542;234542;234542;234542;270076;270076;56495;56527;56527;56527;69724;69724	0;0;0;0;0;0;0;0;0;0;0;0;0;0;0;0;0;0;0;0;9261;0;0;0;0;0
chr19	43593478	43628130	34653	*	9.78	9.12	10.23	-1.11	2.46e-32	1.99e-29	587	523.44	1256.9	1145.33	Promoter (<=1kb)	19	43612325	43615892	3568	1	18089	uc008hok.1	0	ENSMUSG00000044220	Nkx2-3	NK2 homeobox 3	uc008hok.1	18089	0
chr1	74761292	74811763	50472	*	9.94	9.31	10.37	-1.06	3.19e-32	2.42e-29	634	639.17	1400.37	1245.4	Promoter (<=1kb)	1	74792019	74804176	12158	1	22409	uc007bnf.3	0	ENSMUSG00000026167	Wnt10a	wingless-type MMTV integration site family, member 10A	uc007bnf.3;uc007bne.1	22409;22420	0;0
chr9	2999865	3038547	38683	*	16.83	17.08	16.53	0.55	1.23e-30	8.81e-28	140685	135820	91779.2	97257.4	Promoter (<=1kb)	9	3038669	3038743	75	2	100628572	uc029wxb.1	196	ENSMUSG00000106183	Mir101c	microRNA 101c	uc029wxb.1	100628572	196
chr2	71514961	71554021	39061	*	9.94	9.33	10.37	-1.04	2.15e-30	1.47e-27	650	635.61	1411.45	1235.75	Promoter (<=1kb)	2	71530638	71537891	7254	2	111970	uc008kaw.2	0	NA	Dlx1as	distal-less homeobox 1, antisense	uc008kaw.2;uc008kau.2;uc008kav.1;uc008kax.2;uc008kas.1	111970;13390;13390;13392;66559	0;0;0;0;0
chr11	84514787	84533013	18227	*	9.06	8.28	9.56	-1.28	3.35e-30	2.17e-27	319	302.67	789.37	717.94	Promoter (<=1kb)	11	84519379	84525534	6156	2	16869	uc007kqo.1	0	ENSMUSG00000018698	Lhx1	LIM homeobox protein 1	uc007kqo.1;uc007kqm.1;uc007kqn.1;uc007kqp.2	16869;56321;56321;78365	0;-1286;-1286;0
chr8	84700099	84836861	136763	*	11.72	11.19	12.1	-0.91	6.85e-30	4.22e-27	2255	2426.71	4594.42	4190.71	Promoter (<=1kb)	8	84832282	84835482	3201	1	102060	uc009mnj.1	0	ENSMUSG00000033751	Gadd45gip1	growth arrest and DNA-damage-inducible, gamma interacting protein 1	uc009mnj.1;uc009mnb.1;uc009mnc.2;uc009mnd.2;uc009mne.2;uc009mnf.2;uc009mnk.2;uc009mnl.2;uc009mnm.2;uc009mnn.2;uc009mno.2;uc009mmv.2;uc009mmx.2;uc009mmy.2;uc009mnh.1;uc009mni.2	102060;17095;18032;18032;18032;18032;19358;19358;19358;19358;19358;212528;212528;212528;23863;23863	0;0;0;0;0;0;0;0;0;0;0;0;0;0;0;0
chr14	48637664	48683492	45829	*	10.05	9.51	10.44	-0.93	9.03e-30	5.31e-27	745	712.17	1439.15	1344.26	Promoter (<=1kb)	14	48657677	48662872	5196	2	18424	uc007tjq.3	0	ENSMUSG00000021848	Otx2	orthodenticle homeobox 2	uc007tjq.3;uc007tjr.3;uc007tjs.3;uc033gpq.1;uc007tjt.1	18424;18424;18424;18424;606497	0;0;0;0;0
chr2	31632509	31657931	25423	*	9.31	8.57	9.79	-1.23	5.11e-29	2.87e-26	388	370.33	955.55	819.82	Promoter (<=1kb)	2	31640037	31655795	15759	1	381359	uc012bto.1	0	ENSMUSG00000079466	Prdm12	PR domain containing 12	uc012bto.1	381359	0
chr8	12371572	12407684	36113	*	9.62	8.94	10.08	-1.14	6.18e-29	3.33e-26	485	494.07	1167.72	992.82	Promoter (<=1kb)	8	12395519	12399555	4037	1	20664	uc009kwa.2	0	ENSMUSG00000096014	Sox1	SRY (sex determining region Y)-box 1	uc009kwa.2;uc012fzm.1	20664;434280	0;0
chr7	137291979	137332862	40884	*	9.77	9.19	10.18	-0.99	1.23e-28	6.37e-26	589	575.97	1204.83	1115.19	Promoter (<=1kb)	7	137193671	137314445	120775	2	13593	uc009ker.2	0	ENSMUSG00000010476	Ebf3	early B cell factor 3	uc009ker.2;uc009kes.2;uc012fvm.1	13593;13593;13593	0;0;0
chr1	155727524	155751643	24120	*	9.28	8.56	9.76	-1.2	1.39e-28	6.91e-26	395	359.64	919.55	814.99	Promoter (<=1kb)	1	155701692	155742027	40336	2	16872	uc007dbn.3	0	ENSMUSG00000026468	Lhx4	LIM homeobox protein 4	uc007dbn.3	16872	0
chr1	78173926	78228311	54386	*	10.19	9.7	10.56	-0.86	2.22e-28	1.07e-25	822	841.25	1558.8	1465.42	Promoter (<=1kb)	1	78101267	78197136	95870	2	18505	uc007bqb.2	0	ENSMUSG00000004872	Pax3	paired box 3	uc007bqb.2;uc007bqc.2;uc007bqd.1	18505;18505;18505	0;0;0
chr2	38322447	38366643	44197	*	9.99	9.38	10.41	-1.03	2.53e-28	1.17e-25	692	640.95	1463.52	1259.26	Promoter (<=1kb)	2	38339281	38369737	30457	1	16870	uc008jnk.2	0	ENSMUSG00000000247	Lhx2	LIM homeobox protein 2	uc008jnk.2;uc008jnl.2	16870;16870	0;0
chr5	147264652	147321787	57136	*	10.2	9.64	10.6	-0.96	3.43e-28	1.53e-25	803	793.18	1669.03	1436.49	Promoter (<=1kb)	5	147283189	147283298	110	2	102465309	uc033inv.1	0	ENSMUSG00000098687	Mir7k	microRNA 7k	uc033inv.1;uc009anz.1;uc009any.2;uc009aoa.2;uc009anx.1	102465309;12591;18609;231903;70147	0;0;0;0;0
chr13	55818072	55846467	28396	*	9.38	8.72	9.84	-1.12	3.56e-28	1.54e-25	398	445.1	940.6	889.74	Promoter (<=1kb)	13	55825054	55831425	6372	2	18740	uc007qsd.1	0	ENSMUSG00000021506	Pitx1	paired-like homeodomain transcription factor 1	uc007qsd.1	18740	0
chr6	52289055	52330513	41459	*	9.84	9.26	10.26	-1	4.21e-28	1.76e-25	611	613.35	1294.57	1153.77	Promoter (<=1kb)	6	52313498	52318378	4881	1	14028	uc009byv.1	0	ENSMUSG00000005503	Evx1	even-skipped homeobox 1	uc009byv.1;uc009byu.1	14028;70593	0;0
chr9	91339875	91425152	85278	*	10.76	10.36	11.07	-0.71	5.87e-28	2.37e-25	1330	1297.03	2203.59	2100.18	Promoter (<=1kb)	9	91360345	91365774	5430	2	22771	uc009raf.1	0	ENSMUSG00000032368	Zic1	zinc finger protein of the cerebellum 1	uc009raf.1;uc009rag.1;uc009rah.1;uc009rai.1;uc009rak.1;uc009ral.1	22771;22771;22774;22774;22774;22774	0;0;0;0;0;0
chr10	80483523	80518369	34847	*	9.27	8.52	9.76	-1.24	1.05e-27	4.12e-25	358	376.56	938.94	790.28	Promoter (<=1kb)	10	80494906	80517266	22361	1	246086	uc007gdn.2	0	ENSMUSG00000045518	Onecut3	one cut domain, family member 3	uc007gdn.2;uc007gdo.1;uc011xis.1	246086;67331;67331	0;20755;20755
chr10	42560110	42603914	43805	*	9.95	9.39	10.36	-0.97	1.59e-27	5.99e-25	697	640.95	1383.2	1241.78	Promoter (<=1kb)	10	42561971	42568819	6849	2	21907	uc007eys.1	0	ENSMUSG00000019803	Nr2e1	nuclear receptor subfamily 2, group E, member 1	uc007eys.1;uc007eyt.1	21907;21907	0;0
chr6	52202152	52278110	75959	*	11.04	10.26	11.54	-1.28	1.62e-27	5.99e-25	1280	1168.84	3191.83	2759.05	Promoter (<=1kb)	6	52214491	52215288	798	2	100736249	uc029vvk.2	0	NA	Mira	mistral long non-coding RNA	uc029vvk.2;uc009bym.1;uc012ema.1;uc009byn.2;uc009byo.2;uc009byp.2;uc009byq.5;uc009byr.2;uc029vvl.1;uc009bya.2;uc009byh.1;uc009byi.1;uc009byj.2;uc009byk.2;uc009byl.2;uc033irv.1;uc012elz.1;uc009bye.2;uc009byg.2;uc009byt.2;uc033irw.1	100736249;15395;15395;15396;15397;15397;15397;15397;15398;15400;15402;15403;15404;15404;15405;15405;723820;72628;72628;791364;791364	0;0;0;0;0;0;0;0;0;0;0;0;0;0;0;0;0;0;0;0;0
chr16	18575109	18598690	23582	*	9.03	8.29	9.52	-1.23	1.95e-27	7.03e-25	314	312.46	773.31	692.62	Promoter (<=1kb)	16	18581704	18586969	5266	2	21380	uc007yog.2	0	ENSMUSG00000009097	Tbx1	T-box 1	uc007yog.2;uc033gyg.1;uc007yoh.2	21380;21380;21380	0;0;0
chr14	122461046	122502184	41139	*	10.01	9.5	10.39	-0.89	4.85e-27	1.7e-24	730	718.4	1384.31	1296.03	Promoter (<=1kb)	14	122475384	122480328	4945	1	22772	uc007vbd.1	0	ENSMUSG00000061524	Zic2	zinc finger protein of the cerebellum 2	uc007vbd.1;uc007vbb.2;uc007vbc.1	22772;65100;69248	0;0;0
chr4	99639671	99668759	29089	*	9.42	8.75	9.87	-1.12	9.35e-27	3.19e-24	449	412.17	993.22	876.48	Promoter (<=1kb)	4	99656299	99658671	2373	1	15221	uc008tuv.1	0	ENSMUSG00000067261	Foxd3	forkhead box D3	uc008tuv.1	15221	0
chr6	6840452	6895072	54621	*	10.24	9.75	10.6	-0.84	1.68e-26	5.56e-24	867	860.83	1615.3	1479.89	Promoter (<=1kb)	6	6877801	6882068	4268	2	13395	uc009awy.2	0	ENSMUSG00000029755	Dlx5	distal-less homeobox 5	uc009awy.2;uc009awz.2;uc009aww.1;uc009awx.2;uc009awt.1;uc009awu.1	13395;13395;13396;13397;320038;320038	0;0;0;0;0;0
chr16	17795081	17836846	41766	*	9.74	9.17	10.15	-0.97	2.53e-26	8.19e-24	572	581.31	1187.66	1077.22	Promoter (<=1kb)	16	17797282	17808290	11009	1	224024	uc007yme.1	0	ENSMUSG00000012017	Scarf2	scavenger receptor class F, member 2	uc007ymi.4;uc012abx.3;uc033gyb.2;uc033gyc.2;uc007ymj.3;uc007ymc.2;uc007yme.1;uc007ymd.2;uc007ymf.2;uc012abw.1;uc007ymg.1	13356;13356;13356;13356;13356;224023;224024;224024;224024;433004;80733	54882;54882;54882;54882;56622;35460;0;0;0;0;0
chr17	85605786	85626803	21018	*	8.35	7.45	8.9	-1.45	5.7e-26	1.8e-23	176	173.59	495.78	458.13	Promoter (<=1kb)	17	85601932	85615743	13812	2	100043902	uc057kyu.1	0	ENSMUSG00000093460	Six3os1	SIX homeobox 3, opposite strand 1	uc057kyu.1;uc029tky.1;uc008dtw.3;uc057kyv.1;uc008dtx.3;uc008dty.3;uc012ayg.2;uc029tkz.1;uc029tla.1;uc029tlb.2;uc057kyw.1;uc008dub.2;uc033hfi.1	100043902;100043902;100043902;100043902;100043902;100043902;100043902;100043902;100043902;100043902;100043902;20473;20473	0;0;0;0;0;0;0;0;0;0;0;0;0
chr7	79493306	79520845	27540	*	9.2	8.54	9.66	-1.11	6.36e-26	1.96e-23	360	385.46	837.56	777.02	Promoter (<=1kb)	7	79500026	79534403	34378	1	101694	uc009hyl.2	0	ENSMUSG00000097023	Mir9-3hg	Mir9-3 host gene	uc009hyl.2;uc029wme.1;uc029wmf.1;uc009hym.2;uc029wmg.1;uc012fnh.1	101694;101694;101694;101694;101694;723968	0;0;0;0;0;0
chr13	48643571	48674979	31409	*	9.46	8.82	9.9	-1.08	9.38e-26	2.78e-23	436	469.14	1010.95	896.37	Promoter (<=1kb)	13	48663036	48666507	3472	1	12022	uc007qil.1	0	ENSMUSG00000021381	Barx1	BarH-like homeobox 1	uc007qil.1	12022	0
chr3	66966496	66988892	22397	*	9.16	8.5	9.62	-1.12	9.44e-26	2.78e-23	382	341.84	795.46	774	Promoter (<=1kb)	3	66971723	66978811	7089	2	20429	uc056zss.1	0	ENSMUSG00000027833	Shox2	short stature homeobox 2	uc056zss.1;uc008plc.2;uc008pld.2;uc008ple.2;uc008plf.1;uc008plg.1;uc008plh.1;uc008pli.1;uc008plj.1	20429;20429;20429;20429;66880;66880;66880;66880;66880	0;0;0;0;0;0;0;0;0
chr15	35288470	35312819	24350	*	9.3	8.65	9.75	-1.1	1.13e-25	3.23e-23	417	385.46	905.15	816.8	Promoter (<=1kb)	15	35296112	35303305	7194	1	107587	uc007vma.1	0	ENSMUSG00000022330	Osr2	odd-skipped related 2	uc007vmc.1;uc007vma.1;uc007vmb.1	100126269;107587;107587	0;0;0
chr1	74875268	74908186	32919	*	9.27	8.63	9.71	-1.08	1.15e-25	3.23e-23	391	402.37	874.68	805.95	Promoter (<=1kb)	1	74889934	74893143	3210	2	12958	uc007bni.2	0	ENSMUSG00000006546	Cryba2	crystallin, beta A2	uc007bni.2;uc007bnj.1;uc007bnh.2;uc011wnd.1;uc011wne.1	12958;241116;260298;260298;723900	0;0;0;0;0
chr5	106435190	106479397	44208	*	9.98	9.43	10.37	-0.94	1.29e-25	3.55e-23	676	701.48	1413.11	1236.36	Promoter (<=1kb)	5	106452523	106458166	5644	2	104382	uc008ylm.1	0	ENSMUSG00000034384	Barhl2	BarH like homeobox 2	uc008ylm.1	104382	0
chr16	91206659	91235090	28432	*	9.22	8.56	9.67	-1.11	1.73e-25	4.65e-23	384	368.55	856.95	772.2	Promoter (<=1kb)	16	91225550	91228677	3128	1	50913	uc007zxe.1	0	ENSMUSG00000039830	Olig2	oligodendrocyte transcription factor 2	uc007zxe.1	50913	0
chr8	69869709	69891854	22146	*	9.25	8.56	9.71	-1.15	2.11e-25	5.58e-23	345	410.39	872.46	804.75	Promoter (<=1kb)	8	69887788	69890885	3098	2	234365	uc009lyc.1	0	ENSMUSG00000048967	Yjefn3	YjeF N-terminal domain containing 3	uc009lyc.1;uc009lyd.2;uc009lyb.2;uc009lxx.1;uc009lxy.1;uc009lxz.1;uc009lya.1	234365;67184;68709;80720;80720;80720;80720	0;10704;0;0;0;0;0
chr1	138820838	138853772	32935	*	9.58	9.02	9.98	-0.96	2.51e-25	6.5e-23	509	529.67	1036.98	989.21	Promoter (<=1kb)	1	138825186	138842444	17259	2	16876	uc007cvr.1	0	ENSMUSG00000019230	Lhx9	LIM homeobox protein 9	uc007cvr.1;uc007cvs.1;uc007cvt.1;uc007cvu.2;uc007cvv.1;uc007cvw.1	16876;16876;16876;16876;69549;69549	0;0;0;0;0;0
chr6	88184725	88206603	21879	*	8.93	8.16	9.43	-1.27	5.51e-25	1.4e-22	289	283.09	747.83	627.52	Promoter (<=1kb)	6	88193891	88207032	13142	1	14461	uc009cvc.2	0	ENSMUSG00000015053	Gata2	GATA binding protein 2	uc009cvc.2;uc009cvd.2	14461;14461	0;0
chr4	115916208	115983872	67665	*	10.27	9.78	10.63	-0.85	1.12e-24	2.78e-22	893	867.06	1687.87	1484.71	Promoter (<=1kb)	4	115915119	115925638	10520	2	140477	uc008ufp.1	0	ENSMUSG00000028707	Dmbx1	diencephalon/mesencephalon homeobox 1	uc008ufp.1;uc008ufq.1;uc057ljv.1;uc012djg.1	140477;140477;140477;14073	0;0;0;0
chr11	21979844	22018525	38682	*	9.74	9.18	10.14	-0.96	1.25e-24	3.06e-22	591	570.62	1195.97	1063.35	Promoter (<=1kb)	11	21994764	22001651	6888	2	18423	uc007idy.1	0	ENSMUSG00000005917	Otx1	orthodenticle homeobox 1	uc007idy.1;uc007idz.1;uc007iea.3;uc007ieb.3	18423;18423;216565;216565	0;0;0;0
chr11	96161298	96212012	50715	*	10.03	9.5	10.41	-0.91	1.46e-24	3.48e-22	706	744.21	1449.12	1273.73	Promoter (<=1kb)	11	96194361	96196599	2239	1	15408	uc007lbk.1	0	ENSMUSG00000049604	Hoxb13	homeobox B13	uc007lbk.1;uc011ydd.1;uc011yde.2;uc033fzl.1;uc007lbl.2	15408;237930;237930;237930;432593	0;0;0;0;0
chr13	40724438	40750047	25610	*	9.19	8.48	9.67	-1.19	1.48e-24	3.48e-22	366	347.18	889.08	738.44	Promoter (<=1kb)	13	40727808	40735162	7355	1	102633805	uc007qek.1	0	ENSMUSG00000097752	Gm26688	predicted gene, 26688	uc007qek.1;uc007qed.3;uc007qee.3;uc007qef.3;uc007qej.3;uc056ytm.1;uc007qeh.1;uc007qei.1;uc011yyq.1	102633805;21418;21418;21418;21418;21418;21418;21418;21418	0;0;0;0;0;0;0;0;0
chr3	99228943	99262644	33702	*	9.48	8.89	9.9	-1	2.23e-24	5.15e-22	481	470.92	999.32	906.62	Promoter (<=1kb)	3	99253760	99354260	100501	1	21384	uc008qql.1	0	ENSMUSG00000027868	Tbx15	T-box 15	uc008qql.1	21384	0
chr5	75065418	75093136	27719	*	9.3	8.67	9.74	-1.07	3.68e-24	8.35e-22	388	425.52	900.16	811.38	Promoter (<=1kb)	5	75075601	75077893	2293	1	14843	uc008xtx.1	0	ENSMUSG00000035946	Gsx2	GS homeobox 2	uc008xtx.1;uc008xty.1	14843;14843	0;0
chr12	56502020	56551541	49522	*	10.1	9.65	10.45	-0.8	3.84e-24	8.57e-22	798	804.75	1436.38	1361.14	Promoter (<=1kb)	12	56490428	56505685	15258	2	104798	uc007npd.2	0	ENSMUSG00000112343	Sfta3-ps	surfactant associated 3, pseudogene	uc007npd.2;uc007npe.2;uc056yqo.1;uc007npf.3;uc007npg.3	104798;104798;104798;21869;21869	0;0;0;0;0
chr2	9871627	9898074	26448	*	9.08	8.35	9.56	-1.2	4.92e-24	1.08e-21	330	324.04	821.5	683.58	Promoter (<=1kb)	2	9857078	9878600	21523	2	14462	uc008ihe.1	0	ENSMUSG00000015619	Gata3	GATA binding protein 3	uc008ihe.1;uc008ihf.1;uc008ihg.1;uc008ihh.2;uc008ihi.1	14462;14462;14462;381347;77682	0;0;0;0;0
chr13	94864839	94905652	40814	*	9.85	9.34	10.23	-0.9	8.82e-24	1.88e-21	655	637.39	1262.44	1141.72	Promoter (<=1kb)	13	94875627	94883681	8055	1	18420	uc007rly.1	0	ENSMUSG00000021685	Otp	orthopedia homeobox	uc007rly.1	18420	0
chr4	154626053	154646566	20514	*	8.77	8.02	9.26	-1.25	8.85e-24	1.88e-21	261	256.38	656.98	570.26	Promoter (<=1kb)	4	154630691	154636367	5677	2	320939	uc008wby.2	0	NA	5930403L14Rik	RIKEN cDNA 5930403L14 gene	uc008wby.2;uc008wbu.1;uc008wbv.1;uc008wbw.1;uc008wbx.1	320939;70673;70673;70673;70673	0;0;0;0;0
chr19	16860896	16885916	25021	*	9.16	8.52	9.61	-1.09	1.29e-23	2.7e-21	379	354.3	823.16	739.04	Promoter (<=1kb)	19	16872316	16873830	1515	2	14240	uc008gxc.1	0	ENSMUSG00000056829	Foxb2	forkhead box B2	uc008gxc.1	14240	0
chr9	69750119	69783411	33293	*	9.55	9.01	9.94	-0.93	1.6e-23	3.28e-21	520	508.31	1007.63	956.05	Promoter (<=1kb)	9	69758740	69830199	71460	1	319970	uc009qnj.2	0	ENSMUSG00000097623	B230323A14Rik	RIKEN cDNA B230323A14 gene	uc009qnj.2;uc029xeo.1;uc012gwj.1	319970;319970;64290	0;0;0
chr6	30170095	30186986	16892	*	8.57	7.72	9.1	-1.38	1.91e-23	3.86e-21	181	240.36	560.04	535.29	Promoter (<=1kb)	6	30176623	30178046	1424	1	100463519	uc029vtv.2	0	NA	BB283400	expressed sequence BB283400	uc029vtv.2;uc057acn.2;uc033iom.1;uc012ejh.1;uc057lph.1;uc012eji.3	100463519;101447999;101447999;387177;387178;723886	0;0;0;-4103;-358;-544
chr3	88198154	88221608	23455	*	9.02	8.32	9.49	-1.17	2.74e-23	5.45e-21	332	308.01	773.86	664.9	Promoter (<=1kb)	3	88215171	88215257	87	1	100526540	uc012crn.1	0	ENSMUSG00000092988	Mir3093	microRNA 3093	uc012crn.1;uc012cro.1	100526540;387133	0;0
chr10	80322094	80358755	36662	*	9.34	8.76	9.76	-1	2.85e-23	5.58e-21	428	436.2	901.82	830.67	Promoter (<=1kb)	10	80321283	80323127	1845	2	18551	uc007gcr.2	0	ENSMUSG00000020131	Pcsk4	proprotein convertase subtilisin/kexin type 4	uc007gcr.2;uc007gcs.2;uc011xiq.1;uc007gcx.2;uc007gcy.2;uc007gcp.1;uc007gcq.1;uc007gcv.3;uc033frc.1;uc007gct.2;uc007gcu.2	18551;18551;18551;216166;216166;23805;66374;66548;66548;70335;70335	0;0;0;0;0;0;-1546;0;0;0;0
chr2	119314817	119337471	22655	*	8.92	8.21	9.4	-1.19	3.22e-23	6.22e-21	304	286.65	722.9	623.9	Promoter (<=1kb)	2	119321199	119325574	4376	2	100043609	uc057bod.1	0	ENSMUSG00000074912	Gm14207	predicted gene 14207	uc057bod.1;uc057boe.2;uc008ltq.1;uc057bof.1;uc008ltr.2	100043609;100043609;100043609;100043609;54485	0;0;0;0;0
chr8	105252629	105305321	52693	*	10.28	9.81	10.63	-0.82	3.76e-23	7.16e-21	838	954.3	1650.75	1522.09	Promoter (<=1kb)	8	105297663	105305370	7708	1	104394	uc009ncl.1	0	ENSMUSG00000014859	E2f4	E2F transcription factor 4	uc009ncl.1;uc009nbt.3;uc009nbu.3;uc009nbv.3;uc009nbw.1;uc009ncm.2;uc009ncn.2;uc012gjh.1;uc009nco.2;uc009nca.2;uc009ncb.2;uc009ncc.2;uc012gjg.2;uc009nci.1;uc009ncj.1;uc009nbz.2;uc012gjf.1;uc009nby.1;uc012gji.1;uc009ncf.1;uc009nce.2;uc009ncg.2;uc009nch.2;uc009ncd.1;uc009nbx.2;uc029wvg.2	104394;234678;234678;234678;234678;234683;234683;234683;234683;26386;26386;26386;26386;277978;277978;50788;50788;71609;723841;74356;74356;74356;74356;78688;97440;97440	0;0;0;0;3886;-280;-280;-280;-1024;0;0;0;0;0;0;0;0;0;3139;0;0;0;0;0;0;0
chr10	80833363	80845404	12042	*	8.12	7.2	8.68	-1.48	3.98e-23	7.47e-21	138	155.79	421	396.65	Promoter (<=1kb)	10	80832801	80844039	11239	2	237403	uc007gey.3	0	ENSMUSG00000051067	Lingo3	leucine rich repeat and Ig domain containing 3	uc011xiz.1;uc033frg.1;uc056yhp.1;uc007gey.3	100316778;18245;18245;237403	4566;6707;6707;0
chr5	29461445	29498522	37078	*	9.41	8.86	9.81	-0.96	4.2e-23	7.77e-21	450	476.26	899.05	899.39	Promoter (<=1kb)	5	29473823	29478470	4648	2	15285	uc008wuk.2	0	ENSMUSG00000001566	Mnx1	motor neuron and pancreas homeobox 1	uc008wuk.2	15285	0
chr5	28149850	28177933	28084	*	9.13	8.52	9.55	-1.04	5.38e-23	9.8e-21	365	366.77	767.21	736.03	Promoter (<=1kb)	5	28165696	28172166	6471	1	13799	uc008wtv.1	0	ENSMUSG00000039095	En2	engrailed 2	uc008wtv.1	13799	0
chr11	33189158	33208053	18896	*	8.8	8.1	9.28	-1.18	9.42e-23	1.69e-20	269	279.53	652.55	586.53	Promoter (<=1kb)	11	33200752	33203588	2837	2	27140	uc007ikg.2	0	ENSMUSG00000040610	Tlx3	T cell leukemia, homeobox 3	uc007ikg.2;uc007ikh.2;uc007ikk.3	27140;66011;66011	0;0;0
chr8	70073427	70130697	57271	*	10.34	9.89	10.69	-0.8	1.42e-22	2.52e-20	919	977.45	1748.25	1547.4	Promoter (<=1kb)	8	70102524	70102586	63	2	102465646	uc033jfx.1	0	ENSMUSG00000099042	Mir7066	microRNA 7066	uc033jfx.1;uc009lyp.2;uc009lyq.2;uc009lys.2;uc009lyt.1;uc009lyu.1;uc009lyr.1;uc009lyo.1;uc009lyv.3;uc009lyw.3;uc033jfy.2	102465646;107770;107770;13004;19727;19727;330790;70616;75692;75692;75692	0;0;0;0;8500;8500;0;0;-630;-630;-630
chr13	36719336	36743411	24076	*	9.12	8.48	9.56	-1.08	2.37e-22	4.14e-20	345	369.44	801	711.31	Promoter (<=1kb)	13	36725622	36734477	8856	2	68404	uc007qcm.3	0	ENSMUSG00000039114	Nrn1	neuritin 1	uc007qcm.3	68404	0
chr13	112975842	113001997	26156	*	9.11	8.51	9.54	-1.02	2.61e-22	4.5e-20	372	357.86	755.03	730	Promoter (<=1kb)	13	112987802	112990778	2977	1	218630	uc007rwz.1	0	ENSMUSG00000042417	Ccno	cyclin O	uc007rwz.1;uc007rxa.1	218630;622408	0;0
chr14	63232119	63273368	41250	*	9.68	9.17	10.05	-0.89	3.24e-22	5.52e-20	586	564.39	1105.12	1022.36	Promoter (<=1kb)	14	63198914	63245271	46358	2	14463	uc007uhn.2	0	ENSMUSG00000021944	Gata4	GATA binding protein 4	uc007uhn.2;uc007uho.2;uc007uhp.1	14463;14463;14463	0;0;0
chr19	45124783	45177946	53164	*	9.92	9.41	10.3	-0.89	3.48e-22	5.85e-20	665	697.03	1348.3	1174.87	Promoter (<=1kb)	19	45150715	45156943	6229	1	21908	uc008hqu.1	0	ENSMUSG00000025215	Tlx1	T cell leukemia, homeobox 1	uc008hqu.1	21908	0
chr11	96249592	96302810	53219	*	9.76	9.22	10.16	-0.94	4.14e-22	6.86e-20	598	591.99	1231.42	1052.5	Promoter (<=1kb)	11	96299171	96301569	2399	1	15414	uc007lbt.1	0	ENSMUSG00000000690	Hoxb6	homeobox B6	uc007lbu.2;uc007lbt.1;uc007lbr.1;uc007lbp.1;uc007lbq.1;uc007lbn.2;uc007lbo.2;uc007lbm.2;uc029rnt.1;uc011ydf.1;uc007lbs.2	15413;15414;15415;15416;15416;15417;15417;193022;193022;387191;75395	-702;0;0;0;0;0;0;0;0;0;0
chr2	118696009	118725800	29792	*	9.15	8.56	9.57	-1.01	6.69e-22	1.1e-19	376	379.23	784.94	737.23	Promoter (<=1kb)	2	118710921	118714105	3185	2	18796	uc008lsj.1	0	ENSMUSG00000040061	Plcb2	phospholipase C, beta 2	uc008lsi.1;uc012cbj.1;uc008lsj.1;uc008lsk.1;uc008lsl.1;uc008lsf.2;uc008lsg.2;uc008lsh.1	18796;18796;18796;18796;18796;214230;214230;383787	0;0;0;0;0;0;0;0
chr2	36087763	36113865	26103	*	9.18	8.58	9.6	-1.02	7.87e-22	1.27e-19	395	371.22	806.54	745.07	Promoter (<=1kb)	2	36081953	36104060	22108	2	16874	uc008jld.1	0	ENSMUSG00000026890	Lhx6	LIM homeobox protein 6	uc008jld.1;uc008jle.1;uc008jlf.1;uc008jlg.1;uc008jlh.2;uc008jli.2;uc012bun.1;uc012buo.1	16874;16874;16874;16874;67889;67889;67889;67889	0;0;0;0;22839;22839;22839;22839
chr17	26833482	26862664	29183	*	9.44	8.85	9.86	-1	9.8e-22	1.57e-19	447	478.04	993.78	860.81	Promoter (<=1kb)	17	26838665	26841565	2901	2	18091	uc008beo.1	0	ENSMUSG00000015579	Nkx2-5	NK2 homeobox 5	uc008beo.1	18091	0
chr1	42678003	42722816	44814	*	9.71	9.23	10.07	-0.84	1.45e-21	2.29e-19	609	595.55	1097.92	1057.93	Promoter (<=1kb)	1	42697146	42700210	3065	1	18993	uc007auw.2	0	ENSMUSG00000045515	Pou3f3	POU domain, class 3, transcription factor 3	uc007auw.2;uc007aus.1;uc007aut.1;uc007auu.1;uc007auv.1;uc033fix.2;uc007aux.2	18993;66297;66297;66297;66297;66620;73100	0;0;0;0;0;0;0
chr8	121696844	121767984	71141	*	10.47	10.1	10.77	-0.66	2.11e-21	3.29e-19	1088	1114.54	1770.41	1717.4	Promoter (<=1kb)	8	121730559	121791083	60525	1	57340	uc009nrz.2	0	ENSMUSG00000025318	Jph3	junctophilin 3	uc009nrz.2	57340	0
chr9	98946621	98982741	36121	*	9.44	8.89	9.84	-0.95	2.46e-21	3.79e-19	469	478.04	962.2	865.03	Promoter (<=1kb)	9	98955607	98958126	2520	1	26927	uc009rdr.2	0	ENSMUSG00000050397	Foxl2	forkhead box L2	uc009rds.1;uc009rdt.2;uc012gyx.1;uc009rdr.2;uc009rdq.2	23873;23873;23873;26927;768252	-3632;-3632;-3632;0;0
chr4	109970565	110008185	37621	*	9.66	9.15	10.03	-0.89	2.84e-21	4.33e-19	570	563.5	1099.03	994.63	Promoter (<=1kb)	4	109978025	109983684	5660	1	242620	uc008ucv.1	0	ENSMUSG00000047143	Dmrta2	doublesex and mab-3 related transcription factor like family A2	uc008ucv.1	242620	0
chr5	101636814	101673077	36264	*	9.56	9.05	9.94	-0.89	4.16e-21	6.26e-19	530	529.67	1026.46	941.58	Promoter (<=1kb)	5	101659184	101664711	5528	2	18096	uc008yim.2	0	ENSMUSG00000035187	Nkx6-1	NK6 homeobox 1	uc008yim.2	18096	0
chr7	79524423	79565484	41062	*	9.6	9.08	9.99	-0.91	4.39e-21	6.53e-19	507	572.4	1056.93	977.75	Exon (uc009hyl.2/101694, exon 3 of 3)	7	79500026	79534403	34378	1	101694	uc009hyl.2	24397	ENSMUSG00000097023	Mir9-3hg	Mir9-3 host gene	uc009hyl.2;uc029wme.1;uc029wmf.1;uc009hym.2;uc029wmg.1	101694;101694;101694;101694;101694	0;0;0;0;0
chr2	105643664	105697348	53685	*	9.93	9.49	10.28	-0.79	4.54e-21	6.67e-19	724	710.39	1278.5	1200.19	Promoter (<=1kb)	2	105657862	105661343	3482	2	103164605	uc056zoc.1	0	ENSMUSG00000102424	Paupar	Pax6 upstream antisense RNA	uc056zoc.1;uc008lku.3;uc008lkv.3;uc012cat.3;uc008lky.3;uc057bnv.1;uc057bnw.1;uc008lla.3;uc008llb.3;uc057bnx.1;uc057bny.1;uc008llc.3;uc008lkt.1;uc012caq.1;uc012car.1;uc012cas.1;uc008lld.2	103164605;18508;18508;18508;18508;18508;18508;18508;18508;18508;18508;18508;402728;402728;402728;402728;77766	0;0;0;0;0;0;0;0;0;0;0;0;0;0;0;0;0
chr9	24758912	24782925	24014	*	9.2	8.64	9.61	-0.97	8.22e-21	1.19e-18	411	384.57	801	759.54	Promoter (<=1kb)	9	24720812	24774303	53492	2	57246	uc009ope.2	0	ENSMUSG00000031965	Tbx20	T-box 20	uc009ope.2;uc009opf.2;uc029wyb.1;uc009opg.2	57246;57246;57246;57246	0;0;0;0
chr12	8296049	8305493	9445	*	7.93	7.01	8.49	-1.48	8.65e-21	1.24e-18	124	133.53	372.8	344.2	Promoter (<=1kb)	12	8297918	8301954	4037	2	238057	uc007mzl.1	0	ENSMUSG00000037660	Gdf7	growth differentiation factor 7	uc007mzl.1;uc057bax.1	238057;238057	0;0
chr11	75164603	75174362	9760	*	7.71	6.66	8.31	-1.64	9.3e-21	1.32e-18	105	97.92	343.45	291.16	Promoter (<=1kb)	11	75164565	75168152	3588	2	15248	uc007kdc.1	0	ENSMUSG00000043099	Hic1	hypermethylated in cancer 1	uc007kcz.1;uc011xze.1;uc007kdc.1;uc007kdd.1;uc007kdf.1;uc007kdg.1;uc011xzh.1;uc011xzg.1	103677;103677;15248;15248;246257;246257;387150;387208	238731;235610;0;0;4951;16121;0;0
chr18	80969365	80993449	24085	*	8.98	8.31	9.43	-1.11	9.36e-21	1.32e-18	328	308.01	744.5	632.95	Promoter (<=1kb)	18	80966359	80974625	8267	2	20689	uc008ftl.3	0	ENSMUSG00000024565	Sall3	spalt like transcription factor 3	uc008ftl.3;uc008ftm.2;uc008ftn.2	20689;20689;20689	0;0;0
chr5	37807455	37837670	30216	*	9.28	8.67	9.7	-1.03	9.55e-21	1.33e-18	395	418.4	899.61	766.17	Promoter (<=1kb)	5	37820491	37824585	4095	2	17701	uc008xfw.1	0	ENSMUSG00000048450	Msx1	msh homeobox 1	uc008xfw.1;uc012dvm.1	17701;93895	0;0
chr2	84861136	84893779	32644	*	9.22	8.64	9.63	-0.99	1.09e-20	1.5e-18	403	395.25	838.67	749.89	Promoter (<=1kb)	2	84871946	84886692	14747	2	269295	uc008kjm.1	0	ENSMUSG00000050896	Rtn4rl2	reticulon 4 receptor-like 2	uc008kjm.1;uc008kji.1;uc008kjj.1;uc008kjk.1;uc008kjl.1	269295;72401;72401;72401;72401	0;0;0;0;0
chr10	80296925	80316448	19524	*	8.63	7.91	9.11	-1.2	1.19e-20	1.62e-18	243	239.47	593.27	512.99	Promoter (<=1kb)	10	80301201	80302494	1294	1	23805	uc056yho.1	0	ENSMUSG00000020135	Apc2	adenomatosis polyposis coli 2	uc007gcr.2;uc007gcs.2;uc011xiq.1;uc007gcn.2;uc057awz.1;uc056yho.1;uc007gcp.1;uc007gcq.1	18551;18551;18551;20054;20054;23805;23805;66374	0;0;0;4494;4416;0;0;4100
chr3	87792617	87818467	25851	*	8.95	8.31	9.39	-1.08	1.56e-20	2.1e-18	306	327.6	707.94	629.93	Promoter (<=1kb)	3	87778244	87795162	16919	2	18211	uc008psw.1	0	ENSMUSG00000028072	Ntrk1	neurotrophic tyrosine kinase, receptor, type 1	uc008psw.1;uc008psx.2;uc008psy.2	18211;23920;23920	0;0;0
chr4	44691365	44751019	59655	*	10.11	9.69	10.44	-0.74	2.21e-20	2.95e-18	823	830.57	1438.04	1332.2	Promoter (<=1kb)	4	44531506	44710440	178935	2	18507	uc008srx.1	0	ENSMUSG00000014030	Pax5	paired box 5	uc008srx.1;uc033ibu.1	18507;70602	0;0
chr15	98889360	98901491	12132	*	8.19	7.37	8.7	-1.33	2.25e-20	2.97e-18	167	163.8	436.51	397.25	Promoter (<=1kb)	15	98891155	98898540	7386	2	13363	uc007xoh.3	0	ENSMUSG00000023000	Dhh	desert hedgehog	uc007xoh.3;uc007xoi.1	13363;74775	0;16607
chr13	98347917	98378149	30233	*	9.4	8.88	9.78	-0.9	2.41e-20	3.15e-18	461	479.82	900.71	856.59	Promoter (<=1kb)	13	98354245	98356705	2461	1	15229	uc009van.1	0	ENSMUSG00000078302	Foxd1	forkhead box D1	uc009van.1	15229	0
chr13	31607351	31634598	27248	*	9.15	8.55	9.57	-1.02	2.57e-20	3.32e-18	367	382.79	809.31	711.31	Promoter (<=1kb)	13	31625816	31631406	5591	1	14238	uc007pzo.2	0	ENSMUSG00000038402	Foxf2	forkhead box F2	uc007pzo.2;uc007pzn.1	14238;71307	0;0
chr3	129181832	129231171	49340	*	9.9	9.42	10.27	-0.85	2.95e-20	3.78e-18	711	658.75	1311.74	1153.17	Promoter (<=1kb)	3	129199878	129219594	19717	1	18741	uc008rhu.2	0	ENSMUSG00000028023	Pitx2	paired-like homeodomain transcription factor 2	uc008rhu.2;uc008rhv.2;uc012cxo.2;uc008rhw.2;uc008rhx.2	18741;18741;18741;18741;18741	0;0;0;0;0
chrX	93282261	93302285	20025	*	8.25	7.42	8.77	-1.36	3.09e-20	3.91e-18	170	171.81	474.73	400.26	Promoter (<=1kb)	20	93286507	93298357	11851	1	11878	uc009tsq.3	0	ENSMUSG00000035277	Arx	aristaless related homeobox	uc009tsq.3;uc009tsr.3;uc009tss.2;uc012hly.1	11878;11878;18968;18968	0;0;329870;329870
chr11	115248295	115269012	20718	*	8.78	8.1	9.24	-1.14	3.38e-20	4.25e-18	285	263.5	644.24	561.21	Promoter (<=1kb)	11	115249169	115266313	17145	2	14813	uc011yhk.1	0	ENSMUSG00000020734	Grin2c	glutamate receptor, ionotropic, NMDA2C (epsilon 3)	uc007mgy.1;uc011yhk.1;uc007mgx.1;uc007mgu.2;uc007mgv.2;uc007mgw.2;uc011yhj.1	14149;14813;14813;320534;320534;320534;320534	0;0;0;60808;60808;60808;60808
chr6	83673176	83722011	48836	*	9.77	9.3	10.12	-0.82	3.58e-20	4.45e-18	651	613.35	1149.43	1077.22	Promoter (<=1kb)	6	83711264	83738304	27041	1	24113	uc009cob.1	0	ENSMUSG00000034777	Vax2	ventral anterior homeobox 2	uc009cob.1;uc009cnw.2;uc009cnx.1;uc009cny.2;uc009cnz.1;uc009coa.1	24113;246278;574519;574519;574519;574519	0;0;0;0;0;0
chr15	75991328	76012123	20796	*	8.62	7.9	9.09	-1.19	3.99e-20	4.91e-18	218	260.83	566.69	525.04	Promoter (<=1kb)	15	76001092	76009498	8407	2	105732	uc007wic.2	0	ENSMUSG00000046761	Fam83h	family with sequence similarity 83, member H	uc007wic.2;uc007wid.2;uc007whz.1;uc007wia.1;uc007wib.1	105732;105732;332110;332110;332110	0;0;0;0;0
chr9	74845581	74873943	28363	*	9.33	8.76	9.74	-0.98	4.09e-20	4.99e-18	433	434.42	914.56	792.69	Promoter (<=1kb)	9	74848437	74852872	4436	1	100503019	uc009qrf.2	0	ENSMUSG00000066477	Gm16551	predicted gene 16551	uc009qrf.2;uc009qrg.3;uc009qrh.2	100503019;100503019;15379	0;0;0
chr11	119539826	119551719	11894	*	7.89	6.94	8.46	-1.53	4.95e-20	5.94e-18	122	122.85	385.55	320.09	Promoter (<=1kb)	11	119548630	119569046	20417	1	100503830	uc029rqb.1	0	ENSMUSG00000087675	Gm11762	predicted gene 11762	uc029rqb.1;uc007mqv.1	100503830;18164	0;0
chr6	83063051	83077368	14318	*	8.34	7.58	8.84	-1.26	4.96e-20	5.94e-18	176	206.53	465.31	452.71	Promoter (<=1kb)	6	83068325	83070225	1901	2	21909	uc009cme.1	0	ENSMUSG00000068327	Tlx2	T cell leukemia, homeobox 2	uc009cme.1;uc009cmf.1;uc009cmg.1;uc009cmh.1;uc009cmb.1;uc009cmc.1;uc009cmd.1	21909;21909;69837;69837;93838;93838;93838	0;0;-1022;-1262;5207;0;0
chr9	99838215	99895631	57417	*	10.03	9.61	10.36	-0.76	5.19e-20	6.16e-18	743	815.43	1340.55	1294.83	Promoter (<=1kb)	9	99874106	99876170	2065	2	20669	uc012gzb.1	0	ENSMUSG00000053747	Sox14	SRY (sex determining region Y)-box 14	uc012gzb.1	20669	0
chr2	158602201	158621881	19681	*	8.45	7.73	8.93	-1.2	9.9e-20	1.16e-17	200	223.44	473.07	499.73	Promoter (<=1kb)	2	158595472	158610723	15252	2	100045469	uc008nqj.1	0	ENSMUSG00000086496	Gm14204	predicted gene 14204	uc008nqj.1;uc012cii.1;uc008nql.1;uc008nqm.1;uc012cij.1;uc029uhu.1;uc008nqk.1	100045469;100045469;109275;109275;109275;22348;22348	0;0;-3032;-3032;-3032;0;0
chr18	80705053	80719892	14840	*	8.44	7.73	8.91	-1.18	1.06e-19	1.24e-17	215	210.09	476.95	483.45	Promoter (<=1kb)	18	80606205	80708173	101969	2	18018	uc012bfk.1	0	ENSMUSG00000033016	Nfatc1	nuclear factor of activated T cells, cytoplasmic, calcineurin dependent 1	uc012bfk.1;uc012bfl.1;uc008fte.2;uc012bfm.1;uc008ftf.2;uc008ftg.2	18018;18018;18018;18018;18018;18018	0;0;0;0;0;0
chr6	85176323	85199896	23574	*	8.93	8.32	9.36	-1.04	1.16e-19	1.34e-17	308	332.94	685.78	629.33	Promoter (<=1kb)	6	85187931	85204463	16533	1	13796	uc009cpi.1	0	ENSMUSG00000033726	Emx1	empty spiracles homeobox 1	uc009cpi.1	13796	0
chr3	127620175	127649510	29336	*	9.43	8.9	9.81	-0.91	1.25e-19	1.44e-17	493	462.91	947.8	852.37	Promoter (<=1kb)	3	127633145	127635631	2487	1	11924	uc008rhi.1	0	ENSMUSG00000027967	Neurog2	neurogenin 2	uc008rhi.1;uc008rhf.2;uc008rhh.2;uc008rhg.2	11924;71643;71643;71643	0;66686;66686;66673
chr10	127066977	127092578	25602	*	8.8	8.16	9.24	-1.08	1.4e-19	1.59e-17	264	308.9	611.55	601.6	Promoter (<=1kb)	10	127070481	127071101	621	1	100504703	uc029rjr.1	0	ENSMUSG00000112639	A730063M14Rik	RIKEN cDNA A730063M14 gene	uc029rjr.1;uc007hhv.3;uc007hhx.2;uc007hhy.2;uc007hhz.2;uc007hia.2;uc007hhw.1	100504703;12567;216439;216439;216440;216440;67125	0;0;0;0;28582;28582;0
chr14	67225196	67242308	17113	*	8.86	8.18	9.32	-1.14	2.08e-19	2.35e-17	288	291.99	700.19	575.08	Promoter (<=1kb)	14	67233292	67430952	197661	1	13592	uc007ukw.2	0	ENSMUSG00000022053	Ebf2	early B cell factor 2	uc007ukw.2;uc011znu.2;uc007ukx.2	13592;13592;13592	0;0;0
chr12	104464219	104499313	35095	*	9.31	8.74	9.71	-0.97	2.23e-19	2.49e-17	415	442.43	897.94	780.03	Promoter (<=1kb)	12	104471209	104473236	2028	2	14836	uc007oxh.1	0	ENSMUSG00000021095	Gsc	goosecoid homeobox	uc007oxh.1	14836	0
chr7	143430576	143482043	51468	*	9.66	9.17	10.02	-0.86	2.3e-19	2.54e-17	545	603.56	1089.05	994.03	Promoter (<=1kb)	7	143458339	143461050	2712	2	12577	uc009kpd.2	0	ENSMUSG00000037664	Cdkn1c	cyclin-dependent kinase inhibitor 1C (P57)	uc009kpd.2;uc009kpe.2;uc009kpf.3;uc009kpb.1;uc012fxu.1;uc009kpg.2;uc009kph.2;uc009kpi.2	12577;12577;12577;16535;16535;18400;18400;18400	0;0;0;0;0;0;0;0
chr13	56244871	56269886	25016	*	9.1	8.49	9.52	-1.04	2.5e-19	2.74e-17	367	349.85	796.57	675.75	Promoter (<=1kb)	13	56250492	56252163	1672	2	18014	uc007qsl.3	0	ENSMUSG00000048904	Neurog1	neurogenin 1	uc007qsl.3;uc056ytv.1	18014;75245	0;0
chr5	139528292	139564766	36475	*	9.73	8.97	10.23	-1.25	2.77e-19	3.01e-17	509	494.96	1304.54	1091.08	Promoter (<=1kb)	5	139543898	139545268	1371	1	22255	uc009agu.1	0	ENSMUSG00000029546	Uncx	UNC homeobox	uc009agu.1;uc009agv.2;uc029vpu.1	22255;22255;74973	0;0;0
chr13	73257410	73278025	20616	*	8.69	8.04	9.13	-1.09	2.96e-19	3.19e-17	266	260.83	585.52	536.5	Promoter (<=1kb)	13	73260497	73269620	9124	1	50916	uc007rdf.2	0	ENSMUSG00000021604	Irx4	Iroquois homeobox 4	uc007rdf.2	50916	0
chr5	28454547	28472898	18352	*	8.62	7.93	9.08	-1.14	3.16e-19	3.38e-17	246	243.03	576.1	504.55	Promoter (<=1kb)	5	28456840	28467101	10262	2	20423	uc008wua.2	0	ENSMUSG00000002633	Shh	sonic hedgehog	uc008wua.2;uc008wub.1;uc012dts.1	20423;654796;654796	0;0;0
chr3	107566844	107603526	36683	*	9.53	9.04	9.89	-0.85	3.3e-19	3.5e-17	526	527.89	981.04	913.85	Promoter (<=1kb)	3	107595031	107605875	10845	1	11694	uc008qxf.2	0	ENSMUSG00000014603	Alx3	aristaless-like homeobox 3	uc008qxf.2	11694	0
chr5	139899729	139915491	15763	*	8.43	7.73	8.9	-1.16	3.6e-19	3.78e-17	213	212.76	481.93	470.19	Promoter (<=1kb)	5	139907943	139974725	66783	1	243312	uc009ahi.3	0	ENSMUSG00000048988	Elfn1	leucine rich repeat and fibronectin type III, extracellular 1	uc009ahi.3	243312	0
chr1	56967558	56987398	19841	*	8.6	7.93	9.06	-1.13	4.92e-19	5.14e-17	252	234.13	561.7	503.95	Promoter (<=1kb)	1	56793981	56971334	177354	2	212712	uc007bas.1	0	ENSMUSG00000038331	Satb2	special AT-rich sequence binding protein 2	uc007bas.1;uc011wlc.1;uc011wld.1;uc029qoo.1;uc007bat.2	212712;212712;329160;329160;329160	0;0;0;0;0
chr19	59155449	59199699	44251	*	9.66	9.21	10	-0.79	5.2e-19	5.38e-17	592	591.1	1045.29	1006.69	Promoter (<=1kb)	19	59164485	59170029	5545	2	22326	uc008ibg.2	0	ENSMUSG00000006270	Vax1	ventral anterior homeobox 1	uc008ibg.2	22326	0
chr15	76513301	76529419	16119	*	8.45	7.7	8.94	-1.24	5.54e-19	5.69e-17	192	224.33	527.36	455.72	Promoter (<=1kb)	15	76516203	76522129	5927	2	170729	uc007wko.1	0	ENSMUSG00000048385	Scrt1	scratch family zinc finger 1	uc007wkn.1;uc007wko.1	13350;170729	-1483;0
chr14	70064692	70099850	35159	*	9.39	8.85	9.78	-0.94	5.67e-19	5.77e-17	426	495.85	921.21	842.72	Promoter (<=1kb)	14	70077445	70082613	5169	1	13655	uc007unb.2	0	ENSMUSG00000033730	Egr3	early growth response 3	uc007unb.2;uc007unc.2;uc033gru.1;uc007une.1;uc007una.2	13655;13655;13655;57784;73523	0;0;0;-295;0
chr4	154945609	154963923	18315	*	8.3	7.58	8.78	-1.2	6.92e-19	6.99e-17	189	194.07	444.82	436.43	Promoter (<=1kb)	4	154960923	154962371	1449	1	15208	uc008wck.1	0	ENSMUSG00000048001	Hes5	hes family bHLH transcription factor 5	uc008wck.1;uc008wcl.3;uc008wcm.3;uc012dqn.2	15208;269614;269614;269614	0;-200;-200;-200
chr18	35645803	35657069	11267	*	7.87	7	8.41	-1.4	1.35e-18	1.35e-16	125	131.75	351.75	327.32	Promoter (<=1kb)	18	35650351	35655199	4849	2	381148	uc033hgc.1	0	ENSMUSG00000073600	Prob1	proline rich basic protein 1	uc033hgc.1;uc008emm.2;uc008emn.1;uc008emo.2;uc008emp.2	381148;69816;71242;71242;71242	0;0;0;5117;5117
chr4	48041491	48057137	15647	*	8.48	7.72	8.98	-1.25	1.8e-18	1.79e-16	187	235.91	541.2	465.97	Promoter (<=1kb)	4	48045305	48050161	4857	1	18124	uc029uuf.2	0	ENSMUSG00000028341	Nr4a3	nuclear receptor subfamily 4, group A, member 3	uc029uuf.2;uc008suu.2;uc008suv.1	18124;18124;18124	0;0;0
chr4	124871013	124896945	25933	*	8.89	8.3	9.31	-1.01	2.06e-18	2.04e-16	304	328.49	660.3	610.04	Promoter (<=1kb)	4	124881785	124886508	4724	1	230735	uc008urh.2	0	ENSMUSG00000028876	Epha10	Eph receptor A10	uc008urh.2;uc008uri.2;uc029uzi.1	230735;230735;73628	0;0;0
chr7	45401657	45419765	18109	*	8.53	7.83	9	-1.17	2.08e-18	2.04e-16	208	246.59	539.54	484.05	Promoter (<=1kb)	7	45405960	45411382	5423	1	16495	uc009guz.1	0	ENSMUSG00000038201	Kcna7	potassium voltage-gated channel, shaker-related subfamily, member 7	uc009guz.1;uc009gvb.1;uc009gvc.1;uc009gva.1	16495;16866;20174;78405	0;-1181;14699;0
chr4	126279147	126307462	28316	*	8.9	8.33	9.31	-0.99	2.13e-18	2.06e-16	317	325.82	657.53	616.07	Promoter (<=1kb)	4	126286794	126314330	27537	1	329941	uc008utd.1	0	ENSMUSG00000056174	Col8a2	collagen, type VIII, alpha 2	uc008utc.1;uc008utd.1	27096;329941	16742;0
chr8	125037792	125418906	381115	*	12.79	12.62	12.94	-0.32	2.14e-18	2.06e-16	6141	6450.46	8012.81	7723.76	Promoter (<=1kb)	8	125054195	125090970	36776	1	244667	uc009nyb.1	0	ENSMUSG00000043051	Disc1	disrupted in schizophrenia 1	uc009nyb.1;uc012gnb.1;uc009nyc.1;uc009nyd.1;uc009nye.1;uc009nyf.1;uc009nya.1	244667;244667;244667;244667;244668;244668;53424	0;0;0;0;0;0;0
chr15	99220043	99230617	10575	*	8.11	7.34	8.62	-1.28	2.31e-18	2.21e-16	159	164.69	406.6	377.96	Promoter (<=1kb)	15	99224976	99242817	17842	1	16512	uc011zzc.1	0	ENSMUSG00000037579	Kcnh3	potassium voltage-gated channel, subfamily H (eag-related), member 3	uc011zzc.1	16512	0
chr15	74511708	74543973	32266	*	8.81	8.16	9.26	-1.1	2.57e-18	2.44e-16	266	307.12	658.64	567.84	Promoter (<=1kb)	15	74516196	74540560	24365	1	107831	uc011zua.1	0	ENSMUSG00000034730	Adgrb1	adhesion G protein-coupled receptor B1	uc011zua.1;uc007wco.1;uc007wcp.1;uc011zub.1	107831;107831;107831;107831	0;0;0;0
chr2	122294752	122321611	26860	*	9.01	8.44	9.42	-0.98	4.36e-18	4.11e-16	350	344.51	727.88	643.19	Promoter (<=1kb)	2	122303549	122313730	10182	2	213696	uc008mao.1	0	ENSMUSG00000027224	Duoxa1	dual oxidase maturation factor 1	uc008mao.1;uc008mak.1;uc012ccx.1;uc008mam.1;uc008map.1	213696;214593;214593;66811;99439	0;0;0;0;0
chr8	120673288	120819051	145764	*	11.42	11.16	11.63	-0.47	5.99e-18	5.62e-16	2250	2332.35	3280.46	3074.92	Promoter (<=1kb)	8	120736358	120743234	6877	1	15900	uc009nrj.2	0	ENSMUSG00000041515	Irf8	interferon regulatory factor 8	uc009nrh.2;uc009nri.2;uc009nrj.2;uc009nrk.3;uc057anf.2	12857;12857;15900;15900;15900	0;0;0;0;0
chr10	84751303	84771222	19920	*	8.74	8.14	9.17	-1.03	6.26e-18	5.82e-16	285	277.75	600.48	549.16	Promoter (<=1kb)	10	84756048	84906538	150491	1	71137	uc007gkv.1	0	ENSMUSG00000020037	Rfx4	regulatory factor X, 4 (influences HLA class II expression)	uc007gkv.1	71137	0
chr2	70462680	70482638	19959	*	8.86	8.28	9.27	-0.99	6.78e-18	6.27e-16	321	301.78	642.58	595.57	Promoter (<=1kb)	2	70474923	70477726	2804	1	64406	uc008jzg.1	0	ENSMUSG00000075304	Sp5	trans-acting transcription factor 5	uc008jzg.1	64406	0
chr4	124650344	124673663	23320	*	8.68	8.02	9.13	-1.11	7.35e-18	6.75e-16	260	259.05	611.55	511.78	Promoter (<=1kb)	4	124657646	124660655	3010	1	18991	uc029uzh.1	0	ENSMUSG00000090125	Pou3f1	POU domain, class 3, transcription factor 1	uc029uzh.1	18991	0
chr2	160358351	160377577	19227	*	8.66	8.05	9.1	-1.05	7.95e-18	7.24e-16	265	263.5	571.12	523.24	Promoter (<=1kb)	2	160363677	160367065	3389	2	16658	uc008nqw.2	0	ENSMUSG00000074622	Mafb	v-maf musculoaponeurotic fibrosarcoma oncogene family, protein B (avian)	uc008nqw.2	16658	0
chr19	25598081	25628364	30284	*	9.25	8.72	9.64	-0.93	8.1e-18	7.33e-16	395	445.99	842.55	758.33	Promoter (<=1kb)	19	25610537	25623921	13385	1	240590	uc008hbk.2	0	ENSMUSG00000042372	Dmrt3	doublesex and mab-3 related transcription factor 3	uc008hbk.2;uc012bju.1;uc012bjv.1	240590;50796;50796	0;0;0
chr11	82385170	82394986	9817	*	7.58	6.64	8.15	-1.5	8.87e-18	7.97e-16	103	97.03	287.5	279.1	Promoter (<=1kb)	11	82388900	82446361	57462	1	270893	uc007kmv.2	0	ENSMUSG00000020701	Tmem132e	transmembrane protein 132E	uc007kmv.2;uc011yaw.2	270893;270893	0;0
chr10	81449104	81481762	32659	*	9	8.4	9.42	-1.02	1.01e-17	9.05e-16	309	368.55	721.79	648.62	Promoter (<=1kb)	10	81459227	81473131	13905	2	319586	uc007gib.3	0	ENSMUSG00000034818	Celf5	CUGBP, Elav-like family member 5	uc007gig.1;uc007gib.3;uc007gic.3;uc007gid.3;uc007gie.3;uc007gif.1	103425;319586;319586;319586;319586;319586	14601;0;0;0;0;0
chr11	115312219	115355275	43057	*	9.38	8.85	9.76	-0.91	1.04e-17	9.22e-16	446	478.04	933.95	805.35	Promoter (<=1kb)	11	115315192	115321918	6727	2	16470	uc007mhc.1	0	ENSMUSG00000045288	Ush1g	USH1 protein network component sans	uc007mhc.1;uc007mhg.1;uc007mhh.1;uc007mhb.1;uc007mhd.1;uc007mhe.1;uc007mhf.1	16470;217310;217310;237987;237987;69602;69602	0;0;0;0;0;0;0
chr19	46118065	46150937	32873	*	9.23	8.7	9.62	-0.92	1.11e-17	9.75e-16	413	419.29	836.46	736.03	Promoter (<=1kb)	19	46131899	46135694	3796	1	12686	uc008hsk.1	0	ENSMUSG00000038754	Elovl3	elongation of very long chain fatty acids (FEN1/Elo2, SUR4/Elo3, yeast)-like 3	uc008hsm.1;uc008hsn.1;uc008hso.1;uc008hsp.1;uc008hsk.1;uc008hsl.2	107338;107338;107338;107338;12686;18742	-1621;-1621;-1621;-1621;0;0
chr2	93618793	93655996	37204	*	9.23	8.72	9.6	-0.88	1.3e-17	1.14e-15	442	404.15	781.06	770.99	Promoter (<=1kb)	2	93642434	93680386	37953	1	11695	uc008lgd.2	0	ENSMUSG00000040310	Alx4	aristaless-like homeobox 4	uc008lgd.2;uc012bzt.1	11695;11695	0;0
chr8	122214539	122290908	76370	*	10.38	10	10.69	-0.69	1.38e-17	1.2e-15	952	1092.29	1702.27	1592.01	Promoter (<=1kb)	8	122282141	122337247	55107	1	22761	uc009nsj.1	0	ENSMUSG00000049577	Zfpm1	zinc finger protein, multitype 1	uc009nsj.1	22761	0
chr11	97531101	97551815	20715	*	8.48	7.79	8.95	-1.16	1.49e-17	1.28e-15	236	206.53	529.02	458.74	Exon (uc007lee.1/56013, exon 2 of 20)	11	97509340	97575126	65787	2	56013	uc007lee.1	23311	ENSMUSG00000038453	Srcin1	SRC kinase signaling inhibitor 1	uc007lee.1	56013	0
chr19	59440408	59479163	38756	*	9.64	9.17	9.99	-0.82	1.63e-17	1.4e-15	568	585.76	1076.31	954.85	Promoter (<=1kb)	19	59458690	59465357	6668	1	13797	uc008ibl.1	0	ENSMUSG00000043969	Emx2	empty spiracles homeobox 2	uc008ibl.1;uc012bod.1	13797;329078	0;0
chr17	29883786	29893015	9230	*	7.79	6.92	8.33	-1.41	1.82e-17	1.55e-15	126	116.62	340.68	303.21	Promoter (<=1kb)	17	29827958	29887882	59925	2	74762	uc008bto.1	0	ENSMUSG00000043557	Mdga1	MAM domain containing glycosylphosphatidylinositol anchor 1	uc008bto.1	74762	0
chr5	33418490	33448274	29785	*	9.19	8.69	9.56	-0.87	1.85e-17	1.56e-15	412	414.84	762.78	745.67	Promoter (<=1kb)	5	33430734	33434090	3357	2	672284	uc056zzg.1	0	ENSMUSG00000029112	Nkx1-1	NK1 homeobox 1	uc056zzg.1;uc012duq.1;uc008xas.2;uc012dur.1	672284;71101;71101;71101	0;0;0;0
chr5	107708698	107737192	28495	*	9.3	8.81	9.67	-0.86	2.19e-17	1.84e-15	454	441.54	851.97	778.83	Promoter (<=1kb)	5	107716655	107721342	4688	2	14581	uc008ymu.2	0	ENSMUSG00000029275	Gfi1	growth factor independent 1 transcription repressor	uc008ymu.2;uc057lmz.1;uc029vkg.1;uc057lna.1;uc029vkh.1;uc057lnb.1;uc008ymx.2	14581;14581;14581;14581;14581;14581;14581	0;0;0;0;0;0;0
chr7	139576106	139586621	10516	*	8.01	7.23	8.51	-1.28	2.26e-17	1.89e-15	154	145.99	379.45	350.83	Promoter (<=1kb)	7	139579376	139582797	3422	2	14912	uc012fvu.1	0	ENSMUSG00000041309	Nkx6-2	NK6 homeobox 2	uc012fvu.1;uc009kfq.2;uc009kfr.2;uc009kfs.2	14912;212111;212111;212111	0;0;0;0
chr2	73258996	73296244	37249	*	9.6	9.12	9.97	-0.85	2.34e-17	1.94e-15	551	560.83	1077.98	924.71	Promoter (<=1kb)	2	73271926	73275771	3846	1	381373	uc008kcj.2	0	ENSMUSG00000068859	Sp9	trans-acting transcription factor 9	uc008kcj.2;uc008kck.2;uc012bxg.1	381373;66935;66935	0;0;0
chr4	125481875	125501690	19816	*	8.51	7.85	8.95	-1.1	2.43e-17	2e-15	227	235.02	522.92	468.38	Promoter (<=1kb)	4	125490831	125714173	223343	1	14807	uc008usa.2	0	ENSMUSG00000001985	Grik3	glutamate receptor, ionotropic, kainate 3	uc033iei.1;uc008usa.2	100124641;14807	-3059;0
chr7	27323810	27341488	17679	*	8.25	7.54	8.72	-1.18	2.51e-17	2.06e-15	184	188.72	441.49	404.48	Promoter (<=1kb)	7	27305141	27333663	28523	2	108075	uc009fvs.3	0	ENSMUSG00000040488	Ltbp4	latent transforming growth factor beta binding protein 4	uc009fvs.3;uc009fvt.2;uc009fvu.2;uc057bzg.1;uc009fvv.1;uc009fvw.1;uc009fvx.1;uc009fvy.1	108075;108075;108075;108075;192192;192192;192192;192192	0;0;0;0;14222;14520;14520;14520
chr1	89917851	89948316	30466	*	9.21	8.7	9.58	-0.88	2.7e-17	2.19e-15	406	424.63	794.36	736.03	Promoter (<=1kb)	1	89927962	89931176	3215	2	14472	uc007bzb.1	0	ENSMUSG00000034486	Gbx2	gastrulation brain homeobox 2	uc007bzb.1;uc007bzd.1;uc007bze.1;uc011wpb.1	14472;208372;208372;208372	0;0;0;0
chr19	6397110	6433079	35970	*	9.24	8.7	9.64	-0.94	2.8e-17	2.26e-15	390	441.54	851.97	743.26	Promoter (<=1kb)	19	6418738	6466750	48013	1	18190	uc008git.2	0	ENSMUSG00000033768	Nrxn2	neurexin II	uc008git.2;uc008giu.2;uc008giv.2;uc012bhm.2;uc008gio.2;uc008gip.1;uc008giq.1;uc008gir.1;uc008gis.1	18190;18190;18190;18190;19309;19395;19395;19395;19395	0;0;0;0;0;0;0;0;0
chr17	85675444	85692816	17373	*	7.82	6.98	8.36	-1.38	2.81e-17	2.26e-15	127	124.63	347.32	308.03	Promoter (<=1kb)	17	85684268	85688254	3987	2	20472	uc008duc.2	0	ENSMUSG00000024134	Six2	sine oculis-related homeobox 2	uc008duc.2	20472	0
chr5	120690595	120713154	22560	*	8.41	7.7	8.89	-1.19	3.54e-17	2.82e-15	190	225.22	507.97	438.84	Promoter (<=1kb)	5	120680264	120695403	15140	2	14357	uc008zht.1	0	ENSMUSG00000029603	Dtx1	deltex 1, E3 ubiquitin ligase	uc008zht.1;uc008zhu.1	14357;14357	0;0
chr15	7803875	7825097	21223	*	8.85	8.29	9.25	-0.96	3.55e-17	2.82e-15	321	306.23	624.85	594.37	Promoter (<=1kb)	15	7810048	7837580	27533	1	14573	uc007vee.2	0	ENSMUSG00000022144	Gdnf	glial cell line derived neurotrophic factor	uc007vee.2;uc007vef.2;uc056yye.1;uc056yyf.1	14573;14573;14573;14573	0;0;0;0
chr15	76177924	76184139	6216	*	7.11	5.92	7.75	-1.83	3.98e-17	3.14e-15	51	70.33	218.25	213.39	Exon (uc007wir.2/18810, exon 26 of 32)	15	76170974	76195710	24737	2	18810	uc007wir.2	11571	ENSMUSG00000022565	Plec	plectin	uc007wir.2;uc007wis.2;uc007wit.2;uc007wiu.2;uc007wjd.2;uc007wiv.2;uc007wiw.2;uc007wjc.2;uc007wix.2;uc007wje.2;uc007wiy.2;uc007wiz.2;uc007wja.2;uc007wjb.2;uc011zuq.1;uc007wjf.1	18810;18810;18810;18810;18810;18810;18810;18810;18810;18810;18810;18810;18810;18810;18810;18810	0;0;0;0;0;0;0;0;0;0;0;0;0;0;0;48431
chr14	12335917	12355315	19399	*	8.7	8.05	9.14	-1.09	4.21e-17	3.3e-15	246	283.09	608.79	520.22	Promoter (<=1kb)	14	12341892	12345844	3953	2	54713	uc007sft.2	0	ENSMUSG00000021743	Fezf2	Fez family zinc finger 2	uc007sft.2;uc007sfs.2	54713;54713	0;0
chr14	70619123	70645487	26365	*	8.9	8.35	9.3	-0.95	5.01e-17	3.91e-15	316	336.5	655.32	608.23	Promoter (<=1kb)	14	70602184	70627065	24882	2	13829	uc033grx.2	0	ENSMUSG00000022099	Dmtn	dematin actin binding protein	uc057ksz.1;uc033grx.2;uc057kta.1;uc057ktb.1;uc057ktc.1;uc057ktd.1;uc007uos.1;uc011zoc.1;uc007uot.2	13829;13829;13829;13829;13829;13829;14171;14171;328440	-554;0;0;0;0;0;0;0;7597
chr2	146208304	146228770	20467	*	8.73	8.13	9.15	-1.02	5.36e-17	4.15e-15	274	286.65	596.6	537.1	Promoter (<=1kb)	2	146221997	146225020	3024	1	53626	uc008msh.3	0	ENSMUSG00000068154	Insm1	insulinoma-associated 1	uc008msh.3	53626	0
chr7	140043062	140073200	30139	*	9.24	8.72	9.61	-0.89	6.44e-17	4.96e-15	394	450.45	809.87	756.52	Promoter (<=1kb)	7	140046157	140048999	2843	2	17703	uc057lvs.1	0	ENSMUSG00000025469	Msx3	msh homeobox 3	uc057lvs.1;uc012fwf.1;uc012fwg.1;uc009kgr.1;uc009kgs.2;uc009kgo.2;uc012fwe.1;uc009kgp.2	17703;17703;68566;68566;68566;69752;69752;69752	0;0;0;0;0;6671;6671;6273
chr3	34633988	34675154	41167	*	9.57	9.07	9.93	-0.86	6.5e-17	4.98e-15	540	535.02	1061.91	893.96	Promoter (<=1kb)	3	34638464	34638542	79	1	100316679	uc012cos.1	0	ENSMUSG00000104797	Mir1897	microRNA 1897	uc012cos.1;uc008oxu.3;uc012cor.1;uc029ukx.1;uc029uky.1;uc029ukz.1	100316679;20674;320478;320478;320478;320478	0;0;0;0;0;0
chr7	98825558	98847665	22108	*	8.71	8.1	9.14	-1.04	8.07e-17	6.14e-15	264	283.09	601.03	524.44	Promoter (<=1kb)	7	98835112	98854747	19636	1	22411	uc009ikv.3	0	ENSMUSG00000015957	Wnt11	wingless-type MMTV integration site family, member 11	uc009ikv.3;uc009ikw.3;uc009ikx.2;uc012fpu.1	22411;22411;22411;22411	0;0;0;0
chr11	119080426	119099374	18949	*	8.4	7.69	8.88	-1.2	8.35e-17	6.32e-15	209	202.97	521.26	421.96	Promoter (<=1kb)	11	119077571	119082656	5086	2	12418	uc007mpv.2	0	ENSMUSG00000039989	Cbx4	chromobox 4	uc007mpv.2;uc007mpw.2;uc007mpx.2	12418;12418;12418	0;0;0
chr4	11380867	11399692	18826	*	8.84	8.27	9.24	-0.97	9.14e-17	6.87e-15	306	312.46	635.37	575.68	Promoter (<=1kb)	4	11331933	11384462	52530	2	207920	uc008rzl.3	0	ENSMUSG00000040728	Esrp1	epithelial splicing regulatory protein 1	uc008rzl.3;uc008rzk.4;uc008rzm.3;uc012dao.2;uc008rzn.1	207920;207920;207920;207920;207920	0;0;0;0;0
chr11	98311204	98354237	43034	*	9.74	9.01	10.22	-1.21	1.05e-16	7.88e-15	497	535.02	1296.78	1085.65	Promoter (<=1kb)	11	98325417	98329645	4229	2	18013	uc009vai.1	0	ENSMUSG00000038255	Neurod2	neurogenic differentiation 2	uc009vai.1;uc007lfz.2;uc007lga.2;uc057azx.1;uc007lgb.2;uc007lgc.2;uc007lgd.2;uc007lge.2;uc029rnx.1	18013;19049;19049;19049;19049;59045;59045;59045;69338	0;0;0;0;0;-4131;-4131;-4131;0
chr8	70354815	70383452	28638	*	9.47	9.02	9.81	-0.79	1.19e-16	8.87e-15	500	536.8	916.22	880.1	Promoter (<=1kb)	8	70373548	70382066	8519	1	12845	uc009mad.2	0	ENSMUSG00000031849	Comp	cartilage oligomeric matrix protein	uc009mad.2;uc009mab.2;uc012gfa.1;uc009mae.1	12845;19704;19704;382056	0;-1542;-1542;0
chr15	99085859	99099732	13874	*	8.25	7.54	8.72	-1.18	1.69e-16	1.25e-14	183	190.5	450.91	393.63	Promoter (<=1kb)	15	99084754	99087728	2975	2	239659	uc007xot.1	0	ENSMUSG00000001076	C1ql4	complement component 1, q subcomponent-like 4	uc033gwn.1;uc007xot.1;uc007xou.2;uc007xor.2;uc007xos.2	102465579;239659;72778;78733;78733	5054;0;0;10886;10886
chr3	87990471	88031220	40750	*	9.56	9.13	9.88	-0.75	1.72e-16	1.26e-14	555	565.28	956.11	933.14	Promoter (<=1kb)	3	87987531	88000356	12826	2	12032	uc008pto.2	0	ENSMUSG00000004892	Bcan	brevican	uc008pto.2;uc008ptp.2;uc008ptq.2	12032;12032;73940	0;0;0
chr4	114896567	114928125	31559	*	9.36	8.86	9.73	-0.86	1.83e-16	1.34e-14	481	451.34	904.04	791.49	Promoter (<=1kb)	4	114909289	114921118	11830	1	100040736	uc008ued.2	0	ENSMUSG00000085399	Foxd2os	forkhead box D2, opposite strand	uc008ued.2;uc008uee.2;uc012dix.1;uc008uef.1	100040736;100040736;17301;30923	0;0;0;0
chr15	99568498	99604179	35682	*	9.29	8.81	9.66	-0.85	1.87e-16	1.36e-14	459	437.98	848.09	767.37	Promoter (<=1kb)	15	99579056	99584545	5490	1	11827	uc007xps.2	0	ENSMUSG00000023013	Aqp2	aquaporin 2	uc007xps.2;uc007xpt.1;uc007xpu.1;uc007xpv.1;uc007xpw.1	11827;11830;11830;11831;11831	0;0;0;0;0
chr12	57529897	57556496	26600	*	9.05	8.54	9.42	-0.88	1.88e-16	1.36e-14	373	373.89	699.63	672.13	Promoter (<=1kb)	12	57540631	57546121	5491	2	15375	uc007nps.2	0	ENSMUSG00000035451	Foxa1	forkhead box A1	uc007nps.2	15375	0
chr11	101771730	101793400	21671	*	8.88	8.29	9.29	-1	2.01e-16	1.44e-14	324	303.56	675.81	576.28	Promoter (<=1kb)	11	101769748	101784347	14600	2	18612	uc007lps.2	0	ENSMUSG00000017724	Etv4	ets variant 4	uc007lps.2;uc007lpt.2;uc007lpu.2;uc057bag.1;uc007lpv.1;uc007lpw.1;uc007lpr.2	18612;18612;18612;18612;18612;18612;217207	0;0;0;0;0;0;38774
chr15	89052601	89072636	20036	*	8.47	7.8	8.92	-1.12	2.01e-16	1.44e-14	216	230.56	521.82	446.08	Promoter (<=1kb)	15	89059726	89069878	10153	1	406218	uc011zxq.1	0	ENSMUSG00000058441	Panx2	pannexin 2	uc011zxq.1;uc007xfa.2;uc007xfc.1;uc007xfd.1;uc011zxr.1;uc007xfe.1;uc007xfb.1;uc007xey.1	406218;406218;67976;67976;67976;67976;69120;83456	0;0;-3428;-3428;-3428;-3959;0;0
chr15	82948080	82970758	22679	*	8.4	7.75	8.85	-1.11	2.07e-16	1.47e-14	219	210.09	488.58	434.62	Promoter (<=1kb)	15	82959218	82959296	79	2	100526477	uc056yzs.1	0	ENSMUSG00000092751	Mir3080	microRNA 3080	uc056yzs.1	100526477	0
chr8	91682595	91954912	272318	*	12.31	12.13	12.47	-0.34	2.19e-16	1.55e-14	4365	4597.04	5797.03	5555.47	Promoter (<=1kb)	8	91798511	91801654	3144	2	16373	uc009msu.2	0	ENSMUSG00000031734	Irx3	Iroquois related homeobox 3	uc009msu.2;uc009msv.2	16373;16373	0;0
chr11	102931819	102957757	25939	*	8.97	8.43	9.35	-0.92	2.81e-16	1.97e-14	323	366.77	670.27	638.98	Promoter (<=1kb)	11	102939264	102946461	7198	2	23829	uc007lsz.2	0	ENSMUSG00000045532	C1ql1	complement component 1, q subcomponent-like 1	uc007lsz.2;uc007lta.2	23829;69739	0;6397
chr11	116522836	116534363	11528	*	7.9	7.11	8.41	-1.31	3.23e-16	2.26e-14	131	145.1	361.73	320.69	Promoter (<=1kb)	11	116531911	116536675	4765	1	20698	uc007mlg.2	0	ENSMUSG00000061878	Sphk1	sphingosine kinase 1	uc007mlg.2;uc007mlh.2;uc007mli.2;uc007mlj.2;uc007mlk.1;uc007mll.2;uc007mlm.1;uc007mln.1	20698;20698;20698;20698;20698;20698;217342;217342	0;0;0;0;-377;-377;9657;47084
chr9	118468367	118491453	23087	*	8.97	8.44	9.35	-0.91	3.39e-16	2.36e-14	357	338.28	683.01	625.71	Promoter (<=1kb)	9	118478189	118482757	4569	1	13813	uc009rzo.2	0	ENSMUSG00000032446	Eomes	eomesodermin	uc009rzo.2;uc009rzp.2;uc009rzq.2	13813;13813;13813	0;0;0
chr1	119414625	119424632	10008	*	7.74	6.86	8.28	-1.42	3.46e-16	2.39e-14	129	103.26	331.81	288.74	Promoter (<=1kb)	1	119415465	119422248	6784	2	16324	uc007cir.1	0	ENSMUSG00000037035	Inhbb	inhibin beta-B	uc007cir.1	16324	0
chr10	42629651	42637371	7721	*	7.57	6.65	8.13	-1.48	3.91e-16	2.69e-14	105	96.14	303.01	256.8	Distal Intergenic	10	42678916	42699991	21076	1	14628	uc007eyu.2	-41545	ENSMUSG00000038280	Ostm1	osteopetrosis associated transmembrane protein 1	NA	NA	NA
chr17	23738208	23748851	10644	*	8.03	7.22	8.54	-1.32	4.37e-16	2.99e-14	150	148.66	415.46	329.74	Promoter (<=1kb)	17	23743234	23751234	8001	1	638247	uc008ate.1	0	ENSMUSG00000097006	9530082P21Rik	RIKEN cDNA 9530082P21 gene	uc008ath.1;uc008asz.1;uc008ata.1;uc008atc.1;uc008ate.1;uc008atf.1;uc008atg.1;uc008atd.1;uc008atb.1	224613;268930;268930;268930;638247;638247;638247;73016;76498	14467;11872;11872;1853;0;-385;-486;0;0
chr15	85572389	85589708	17320	*	8.33	7.65	8.79	-1.15	4.43e-16	3.01e-14	191	210.09	475.28	411.72	Promoter (<=1kb)	15	85581142	85593708	12567	1	105975	uc007xdh.1	0	ENSMUSG00000097209	AU022754	expressed sequence AU022754	uc007xdh.1;uc007xde.2;uc011zxl.1;uc007xdf.2;uc007xdg.2	105975;22422;22422;22422;22422	0;0;0;0;0
chr2	70551760	70578517	26758	*	8.94	8.43	9.32	-0.89	4.68e-16	3.17e-14	343	346.29	654.76	625.71	Promoter (<=1kb)	2	70562129	70577130	15002	1	14415	uc008jzj.2	0	ENSMUSG00000070880	Gad1	glutamate decarboxylase 1	uc008jzj.2;uc056znb.2;uc008jzk.2;uc056znc.1;uc008jzl.1;uc008jzm.2;uc029txz.1	14415;14415;14415;14415;14415;14415;68986	0;0;0;0;0;0;0
chr11	5049942	5065029	15088	*	8.31	7.58	8.79	-1.2	4.83e-16	3.25e-14	177	206.53	483.04	400.26	Promoter (<=1kb)	11	5058128	5060383	2256	1	75668	uc007hvs.1	0	ENSMUSG00000034209	Rasl10a	RAS-like, family 10, member A	uc007hvw.2;uc007hvx.2;uc007hvy.2;uc007hvs.1;uc007hvq.2;uc007hvr.2;uc007hvu.2;uc007hvv.2;uc007hvt.2	14030;14030;14030;75668;78926;78926;78926;78926;78926	34059;34059;34059;0;0;0;0;0;0
chr4	21665583	21705747	40165	*	9.74	9.31	10.07	-0.76	4.87e-16	3.27e-14	652	616.02	1145	1009.7	Promoter (<=1kb)	4	21677480	21685963	8484	2	230025	uc008sco.1	0	ENSMUSG00000040478	Prdm13	PR domain containing 13	uc008sco.1;uc012dav.4;uc008scp.1	230025;230025;230025	0;0;0
chr12	110268033	110290900	22868	*	8.66	8.06	9.08	-1.02	5.24e-16	3.5e-14	262	272.4	577.21	505.15	Promoter (<=1kb)	12	110278048	110278129	82	2	100526515	uc011yup.1	0	ENSMUSG00000080356	Mir1247	microRNA 1247	uc011yup.1;uc007pbi.1;uc007pbh.2;uc011yum.2;uc011yun.2;uc011yuo.2	100526515;107585;353504;353504;353504;353504	0;0;0;0;0;0
chr13	12785680	12946233	160554	*	13.03	13.16	12.89	0.27	5.93e-16	3.94e-14	9222	9078.35	7399.04	7734.61	Promoter (<=1kb)	13	12790821	12800079	9259	2	18812	uc007plw.4	0	ENSMUSG00000056457	Prl2c3	prolactin family 2, subfamily c, member 3	uc007plw.4	18812	0
chr8	71497691	71542191	44501	*	9.78	9.37	10.1	-0.73	6.15e-16	4.06e-14	657	662.32	1151.65	1038.03	Promoter (<=1kb)	8	71534259	71537437	3179	2	69550	uc009mdr.2	0	ENSMUSG00000046718	Bst2	bone marrow stromal cell antigen 2	uc009mdr.2;uc009mdn.1;uc009mdo.1;uc009mds.1;uc009mdt.1;uc009mdp.2	69550;70359;70359;73711;73711;84094	0;0;0;-739;-739;0
chr11	85828893	85847947	19055	*	8.55	7.92	8.99	-1.06	6.21e-16	4.08e-14	253	232.34	543.42	470.19	Promoter (<=1kb)	11	85832615	85841948	9334	1	21385	uc007ksb.1	0	ENSMUSG00000000093	Tbx2	T-box 2	uc007krq.2;uc007krr.2;uc007krs.2;uc007krt.3;uc007kru.2;uc007ksa.3;uc007ksb.1;uc007krx.2;uc007kry.2	192197;192197;192197;192197;192197;192197;21385;69909;69909	0;0;0;0;188189;14893;0;0;0
chr16	18605326	18640596	35271	*	9.19	8.68	9.57	-0.89	6.56e-16	4.29e-14	383	435.31	798.23	717.34	Promoter (<=1kb)	16	18620319	18622403	2085	2	14724	uc007yoi.1	0	ENSMUSG00000050761	Gp1bb	glycoprotein Ib, beta polypeptide	uc007yoi.1;uc012aci.1;uc007yoj.1;uc012acj.1;uc012ack.1	14724;14724;18951;18951;18951	0;0;0;0;0
chr15	82206677	82225220	18544	*	8.25	7.59	8.7	-1.12	6.93e-16	4.5e-14	184	200.3	424.88	408.7	Promoter (<=1kb)	15	82206952	82212815	5864	2	435145	uc029sua.1	0	ENSMUSG00000096883	Shisa8	shisa family member 8	uc011zwr.1;uc007wyi.1;uc029sua.1;uc007wyj.1;uc007wyk.1;uc007wyl.1	20788;20788;435145;72049;72049;72049	59408;59408;0;0;0;0
chr4	22470563	22514883	44321	*	9.82	9.41	10.14	-0.73	7.14e-16	4.62e-14	718	640.95	1172.15	1085.05	Promoter (<=1kb)	4	22490548	22493126	2579	1	105500046	uc057brm.1	0	ENSMUSG00000107859	Gm30731	predicted gene, 30731	uc057brm.1;uc008sdp.2	105500046;18992	0;0
chr2	18654950	18706078	51129	*	10.17	9.79	10.47	-0.68	7.3e-16	4.7e-14	919	847.48	1500.08	1336.42	Promoter (<=1kb)	2	18677018	18686629	9612	1	12151	uc008ily.1	0	ENSMUSG00000026739	Bmi1	Bmi1 polycomb ring finger oncogene	uc008ily.1;uc008ilz.1;uc008ilx.1;uc008ima.1	12151;12151;12238;381350	0;0;0;0
chr7	27362427	27377170	14744	*	8.3	7.66	8.75	-1.09	8.11e-16	5.19e-14	201	202.97	441.49	417.75	Exon (uc009fvz.1/80297, exon 3 of 18)	7	27356383	27394506	38124	2	80297	uc009fvz.1	17336	ENSMUSG00000011751	Sptbn4	spectrin beta, non-erythrocytic 4	uc009fvz.1;uc012fgh.1;uc009fwa.1;uc009fwb.1;uc009fwc.1	80297;80297;80297;80297;80297	0;0;0;0;0
chr4	126728326	126739840	11515	*	8.13	7.4	8.61	-1.21	8.26e-16	5.27e-14	158	179.82	416.57	364.7	Promoter (<=1kb)	4	126716003	126736269	20267	2	332937	uc008uts.1	0	ENSMUSG00000042477	Tfap2e	transcription factor AP-2, epsilon	uc008utu.2;uc008utt.2;uc008uts.1	26562;26562;332937	13587;13589;0
chr7	142654284	142666495	12212	*	8.02	7.26	8.51	-1.24	8.41e-16	5.33e-14	148	159.35	389.42	338.78	Promoter (<=1kb)	7	142659693	142670356	10664	1	111975	uc009koe.1	0	ENSMUSG00000086266	Igf2os	insulin-like growth factor 2, opposite strand	uc009koe.1;uc009kod.3;uc057cbj.1;uc012fxo.1;uc012fxp.2;uc057cbk.1;uc012fxq.1	111975;16002;16002;16002;16002;16002;723874	0;0;0;0;0;0;0
chr2	74639667	74788814	149148	*	11.68	11.16	12.06	-0.91	8.72e-16	5.5e-14	2370	2204.16	4591.65	3975.51	Promoter (<=1kb)	2	74752684	74753742	1059	1	102634401	uc008keh.2	0	ENSMUSG00000085015	Gm14424	predicted gene 14424	uc008keh.2;uc033hnp.1;uc008kdt.2;uc008kei.1;uc008kdx.3;uc033hno.1;uc008kdw.2;uc008kdv.2;uc008kdu.2;uc008kee.1;uc008keg.1;uc057ldm.1;uc008kef.2;uc056zni.2;uc008kea.3;uc008keb.3;uc008kdz.1;uc012bxl.1;uc008kec.1;uc008ked.2	102634401;102634678;14029;15429;15430;15431;15431;15432;15433;15434;15434;15434;15436;15437;15437;15437;15438;387144;73429;73429	0;0;0;0;0;0;0;0;0;0;0;0;0;0;0;0;0;0;0;0
chr11	95820047	95847402	27356	*	8.82	8.25	9.23	-0.98	8.77e-16	5.51e-14	286	323.15	639.81	563.02	Promoter (<=1kb)	11	95842295	95845731	3437	1	14710	uc007lau.1	0	ENSMUSG00000038811	Gngt2	guanine nucleotide binding protein (G protein), gamma transducing activity polypeptide 2	uc007lau.1;uc033fzh.1;uc007lav.1;uc033fzi.1;uc007lap.1;uc007las.2;uc007lat.2;uc011ydb.1	14710;14710;14710;14710;237928;237928;66610;66610	0;0;0;0;0;0;0;0
chr11	95138197	95153258	15062	*	8.55	7.89	9	-1.11	1.04e-15	6.47e-14	227	246.59	565.58	458.13	Promoter (<=1kb)	11	95140447	95145801	5355	2	13394	uc007kzz.2	0	ENSMUSG00000020871	Dlx4	distal-less homeobox 4	uc007kzz.2;uc007laa.2;uc007lab.1	13394;13394;320453	0;0;0
chr6	38633150	38641452	8303	*	7.7	6.88	8.22	-1.34	1.04e-15	6.47e-14	124	112.17	299.13	297.18	Promoter (<=1kb)	6	38626660	38637239	10580	2	74253	uc009bkv.1	0	ENSMUSG00000071537	Klrg2	killer cell lectin-like receptor subfamily G, member 2	uc009bkv.1;uc012eke.1	74253;74253	0;0
chr12	73031426	73062567	31142	*	9.27	8.75	9.65	-0.9	1.07e-15	6.65e-14	439	423.74	875.23	731.2	Promoter (<=1kb)	12	73041827	73046712	4886	2	20471	uc007nwa.2	0	ENSMUSG00000051367	Six1	sine oculis-related homeobox 1	uc007nwa.2	20471	0
chr18	76835156	76869694	34539	*	9.45	9	9.79	-0.79	1.1e-15	6.79e-14	538	486.94	917.33	854.78	Promoter (<=1kb)	18	76856405	76900342	43938	1	664805	uc008fqq.1	0	ENSMUSG00000091519	Skor2	SKI family transcriptional corepressor 2	uc008fqq.1	664805	0
chr5	147177407	147196540	19134	*	8.66	8.06	9.08	-1.03	1.31e-15	8.04e-14	275	257.27	586.63	498.52	Promoter (<=1kb)	5	147188696	147190947	2252	1	14842	uc009anw.2	0	ENSMUSG00000053129	Gsx1	GS homeobox 1	uc009anw.2	14842	0
chr9	55513325	55550945	37621	*	9.61	9.19	9.94	-0.75	1.36e-15	8.32e-14	587	579.53	1028.67	933.14	Promoter (<=1kb)	9	55541149	55546178	5030	1	104360	uc009psm.1	0	ENSMUSG00000032318	Isl2	insulin related protein 2 (islet 2)	uc009psm.1;uc012gts.1;uc012gtt.1;uc009psl.2;uc009psn.1;uc009pso.1;uc012gtu.1	104360;104360;104360;110842;244891;244891;244891	0;0;0;0;0;0;0
chr11	59278926	59315268	36343	*	9.18	8.69	9.55	-0.86	1.38e-15	8.38e-14	400	423.74	794.91	705.28	Promoter (<=1kb)	11	59306930	59333552	26623	1	216795	uc007jdq.1	0	ENSMUSG00000000126	Wnt9a	wingless-type MMTV integration site family, member 9A	uc007jdq.1;uc011xvn.1;uc007jdp.3	216795;216795;22416	0;0;0
chr1	120592027	120626395	34369	*	9.29	8.83	9.65	-0.81	1.48e-15	8.93e-14	436	474.48	827.04	774.61	Promoter (<=1kb)	1	120602487	120607991	5505	1	13798	uc007cjm.2	0	ENSMUSG00000058665	En1	engrailed 1	uc007cjm.2	13798	0
chr14	79762623	79786285	23663	*	9.12	8.63	9.49	-0.85	1.51e-15	9.11e-14	381	413.95	739.52	695.04	Promoter (<=1kb)	14	79766772	79771312	4541	2	18530	uc007uti.3	0	ENSMUSG00000036422	Pcdh8	protocadherin 8	uc007uti.3;uc007utj.3	18530;18530	0;0
chr2	33612575	33651671	39097	*	9.72	9.03	10.18	-1.15	1.53e-15	9.16e-14	493	553.71	1251.36	1069.38	Promoter (<=1kb)	2	33641193	33645663	4471	1	100504399	uc008jhz.1	0	NA	C130021I20Rik	Riken cDNA C130021I20 gene	uc008jhz.1;uc008jia.1;uc008jhy.2	100504399;100504399;16917	0;0;0
chr2	180887000	180899998	12999	*	7.96	7.22	8.45	-1.23	1.67e-15	9.93e-14	149	149.56	366.71	331.54	Promoter (<=1kb)	2	180894040	180894107	68	1	723951	uc012cmf.1	0	ENSMUSG00000065454	Mir124a-3	microRNA 124a-3	uc008okd.1;uc012cmg.1;uc012cmf.1	228994;228994;723951	20938;20938;0
chr8	124746712	124812388	65677	*	10.35	10.02	10.62	-0.6	1.71e-15	1.01e-13	1022	1054.01	1638.01	1511.84	Promoter (<=1kb)	8	124793019	124834704	41686	1	330863	uc012gmz.1	0	ENSMUSG00000036913	Trim67	tripartite motif-containing 67	uc012gmz.1;uc009nxp.1	330863;69627	0;0
chr6	64726367	64746246	19880	*	8.93	8.39	9.33	-0.94	1.87e-15	1.11e-13	324	345.4	690.77	594.97	Promoter (<=1kb)	6	64729146	64731243	2098	1	11921	uc009ceb.3	0	ENSMUSG00000073043	Atoh1	atonal bHLH transcription factor 1	uc009ceb.3	11921	0
chr4	148158257	148176661	18405	*	8.3	7.65	8.74	-1.08	2.05e-15	1.2e-13	191	211.87	433.18	420.76	Promoter (<=1kb)	4	148152799	148158823	6025	2	230903	uc033igs.1	0	ENSMUSG00000029001	Fbxo44	F-box protein 44	uc033igs.1;uc012dpm.2;uc008vug.3;uc008vuh.3;uc012dpn.2;uc008vui.3;uc008vuj.3;uc008vuk.1	230903;230903;230903;230903;230903;230903;230903;230904	0;0;0;0;0;0;0;0
chr3	131098316	131124123	25808	*	9.1	8.6	9.47	-0.87	2.35e-15	1.37e-13	397	379.23	747.27	668.51	Promoter (<=1kb)	3	131110297	131224357	114061	1	16842	uc008rjf.2	0	ENSMUSG00000027985	Lef1	lymphoid enhancer binding factor 1	uc008rjf.2;uc008rjg.2;uc008rji.2;uc008rjj.2;uc008rjk.2	16842;16842;16842;16842;16842	0;0;0;0;0
chr2	180096550	180110138	13589	*	7.97	7.26	8.45	-1.19	2.36e-15	1.38e-13	150	155.79	355.08	344.81	Promoter (<=1kb)	2	180099465	180104407	4943	2	99296	uc008oij.2	0	ENSMUSG00000039059	Hrh3	histamine receptor H3	uc008oij.2;uc029ujf.2	99296;99296	0;0
chr19	46307419	46329658	22240	*	8.4	7.74	8.86	-1.12	2.47e-15	1.43e-13	192	235.02	493.56	434.02	Promoter (<=1kb)	19	46328184	46330446	2263	1	68431	uc008hte.1	0	ENSMUSG00000025226	Fbxl15	F-box and leucine-rich repeat protein 15	uc008hss.1;uc008hst.2;uc008hsu.2;uc008hsv.1;uc008hsx.2;uc008hsy.2;uc008hsz.1;uc008hta.1;uc008htg.2;uc008hth.2;uc008hti.2;uc012bmu.1;uc012bmv.1;uc012bmw.1;uc012bmx.1;uc008hte.1;uc008htf.1;uc012bms.1;uc008htb.1;uc008htc.1;uc012bmt.1;uc008htd.1	100503392;18034;18034;18034;18034;18034;18034;18034;67116;67116;67116;67116;67116;67116;67116;68431;68431;73728;73728;73728;73728;73728	-1808;0;0;0;0;0;0;0;9002;9002;9002;9002;9002;9002;9002;0;0;0;0;0;0;0
chr13	56748434	56763445	15012	*	8	7.23	8.49	-1.26	2.58e-15	1.48e-13	133	167.36	380.01	340.59	Distal Intergenic	13	56703668	56742378	38711	1	17129	uc007qta.2	44766	ENSMUSG00000021540	Smad5	SMAD family member 5	NA	NA	NA
chr8	83987349	84074836	87488	*	10.68	10.38	10.93	-0.55	2.58e-15	1.48e-13	1325	1344.22	2032.42	1865.69	Promoter (<=1kb)	8	84011515	84011633	119	2	100316677	uc012ggx.1	0	ENSMUSG00000080665	Mir1199	microRNA 1199	uc012ggx.1;uc033jgj.1;uc009mll.4;uc009mlm.3;uc009mlt.2;uc009mlu.2;uc009mlv.2;uc009mls.1;uc009mlr.2;uc009mln.1;uc009mlp.2;uc012ggu.1;uc012ggv.1;uc012ggw.1;uc009mlq.1;uc012ggy.1	100316677;102466886;18747;18747;19724;19724;19724;212108;50931;666704;70134;73453;73453;73453;74337;74337	0;0;0;0;0;0;0;0;0;0;0;0;0;0;0;0
chr13	71950136	71976421	26286	*	9.01	8.49	9.4	-0.9	2.71e-15	1.55e-13	370	349.85	719.02	627.52	Promoter (<=1kb)	13	71958232	71963723	5492	2	16371	uc007rdd.1	0	ENSMUSG00000060969	Irx1	Iroquois homeobox 1	uc007rdd.1	16371	0
chr11	57819783	57848651	28869	*	9.18	8.67	9.56	-0.88	2.75e-15	1.57e-13	377	439.76	794.36	713.12	Promoter (<=1kb)	11	57828713	57832147	3435	2	15110	uc007jaf.1	0	ENSMUSG00000037335	Hand1	heart and neural crest derivatives expressed 1	uc007jaf.1	15110	0
chr4	135137557	135157173	19617	*	8.45	7.81	8.89	-1.07	3.13e-15	1.77e-13	213	236.8	506.86	439.45	Promoter (<=1kb)	4	135152496	135171258	18763	1	12399	uc008vgc.1	0	ENSMUSG00000070691	Runx3	runt related transcription factor 3	uc008vgb.1;uc008vgc.1	12399;12399	0;0
chr7	30453077	30470118	17042	*	8.46	7.86	8.88	-1.02	3.19e-15	1.8e-13	238	227	489.13	453.31	Promoter (<=1kb)	7	30447766	30457515	9750	2	243911	uc009gel.1	0	ENSMUSG00000036915	Kirrel2	kirre like nephrin family adhesion molecule 2	uc009gel.1;uc012fho.1;uc012fhq.1;uc009gem.1;uc012fhp.1;uc009gen.1	243911;243911;445267;54631;54631;54631	0;0;0;0;0;0
chr13	31792142	31823956	31815	*	9.09	8.61	9.45	-0.84	3.5e-15	1.97e-13	402	381.9	723.45	678.16	Promoter (<=1kb)	13	31806646	31810635	3990	1	17300	uc007pzp.1	0	ENSMUSG00000050295	Foxc1	forkhead box C1	uc007pzp.1;uc007pzq.1	17300;218138	0;0
chr10	50884918	50939811	54894	*	10.15	9.8	10.43	-0.62	3.89e-15	2.18e-13	935	851.04	1392.06	1360.53	Promoter (<=1kb)	10	50895651	50989152	93502	1	20464	uc007fal.1	0	ENSMUSG00000019913	Sim1	single-minded family bHLH transcription factor 1	uc007fal.1	20464	0
chr8	123617426	123808663	191238	*	11.73	11.52	11.9	-0.38	4.93e-15	2.75e-13	2940	2943.92	3944.64	3716.3	Promoter (<=1kb)	8	123805996	123835291	29296	1	19341	uc009nwo.2	0	ENSMUSG00000019478	Rab4a	RAB4A, member RAS oncogene family	uc009nwo.2;uc029wwv.1;uc009nwm.1	19341;234863;69581	0;0;0
chr5	98164438	98201787	37350	*	9.49	9.06	9.82	-0.76	5.27e-15	2.93e-13	545	524.33	942.26	862.62	Promoter (<=1kb)	5	98180869	98187448	6580	1	77630	uc008ygb.1	0	ENSMUSG00000035456	Prdm8	PR domain containing 8	uc008ygb.1	77630	0
chr15	79499806	79521742	21937	*	8.5	7.91	8.91	-1	5.29e-15	2.93e-13	237	244.81	498	463.56	Promoter (<=1kb)	15	79516408	79527739	11332	1	105785	uc007wto.2	0	ENSMUSG00000010830	Kdelr3	KDEL (Lys-Asp-Glu-Leu) endoplasmic reticulum protein retention receptor 3	uc007wto.2;uc007wtn.2	105785;16520	0;0
chr11	95566713	95599978	33266	*	9.01	8.49	9.39	-0.9	5.75e-15	3.17e-13	348	372.11	715.14	625.11	Promoter (<=1kb)	11	95568818	95587698	18881	2	18053	uc007lam.3	0	ENSMUSG00000000120	Ngfr	nerve growth factor receptor (TNFR superfamily, member 16)	uc007lam.3	18053	0
chr17	56137745	56166052	28308	*	8.71	8.17	9.1	-0.93	6.03e-15	3.3e-13	281	295.55	561.15	534.09	Promoter (<=1kb)	17	56123085	56140343	17259	2	20359	uc008dbe.1	0	ENSMUSG00000001227	Sema6b	sema domain, transmembrane domain (TM), and cytoplasmic domain, (semaphorin) 6B	uc008dbd.2;uc008dbe.1;uc008dbf.2	20359;20359;66443	0;0;0
chr2	25575879	25581263	5385	*	7.22	6.23	7.8	-1.57	6.16e-15	3.36e-13	74	75.67	237.09	208.57	Promoter (<=1kb)	2	25575416	25580099	4684	2	381353	uc008isq.1	0	ENSMUSG00000029419	Ajm1	apical junction component 1	uc008isr.1;uc008iss.3;uc008ist.1;uc008iso.1;uc008isq.1;uc008isp.1	227624;227624;227624;381352;381353;75454	27183;9109;27183;-4563;0;-1008
chr15	75728665	75750061	21397	*	8.49	7.88	8.92	-1.04	6.31e-15	3.42e-13	227	244.81	518.49	450.3	Promoter (<=1kb)	15	75746843	75747922	1080	2	378435	uc007whe.1	0	ENSMUSG00000047591	Mafa	v-maf musculoaponeurotic fibrosarcoma oncogene family, protein A (avian)	uc007whf.1;uc007whe.1	223642;378435	91847;0
chr15	89136670	89150824	14155	*	8.01	7.29	8.48	-1.2	6.32e-15	3.42e-13	152	160.24	380.56	335.16	Promoter (<=1kb)	15	89142482	89149606	7125	2	19094	uc007xfp.3	0	ENSMUSG00000053137	Mapk11	mitogen-activated protein kinase 11	uc007xfq.2;uc011zxs.2;uc007xfr.2;uc033gvy.1;uc007xfp.3;uc007xfm.1;uc007xfl.2;uc007xfn.1;uc007xfo.2	140570;140570;140570;140570;19094;29857;29857;29857;29857	15942;23127;29964;29964;0;0;0;0;0
chr12	111396180	111433405	37226	*	9.24	8.77	9.59	-0.83	6.35e-15	3.42e-13	444	428.19	818.73	726.98	Promoter (<=1kb)	12	111406809	111412077	5269	1	380787	uc007pcu.1	0	ENSMUSG00000087075	Lbhd2	LBH domain containing 2	uc007pcu.1;uc007pcw.2;uc007pcx.3;uc033gfj.1;uc007pcv.2;uc033gfk.1;uc011yuw.2	380787;74190;74190;74190;74190;74190;74190	0;0;0;0;0;0;0
chr12	112127635	112149130	21496	*	8.45	7.78	8.9	-1.12	6.76e-15	3.63e-13	195	245.7	514.06	441.86	Promoter (<=1kb)	12	112130880	112130955	76	1	387199	uc007pel.2	0	ENSMUSG00000065574	Mir203	microRNA 203	uc007pek.1;uc011yvd.1;uc007pel.2;uc007pem.1	104816;104816;387199;668303	20952;6482;0;0
chr7	31039248	31054175	14928	*	8.16	7.45	8.63	-1.18	7.28e-15	3.89e-13	168	182.49	430.97	360.48	Promoter (<=1kb)	7	31040258	31040317	60	2	102465635	uc033iym.1	0	ENSMUSG00000098783	Mir7050	microRNA 7050	uc033iym.1;uc009ghp.3;uc009ghq.3;uc033iyk.1;uc033iyl.1;uc009gho.3;uc009ght.2;uc009ghu.2;uc009ghv.2;uc009ghw.2;uc009ghx.2;uc009ghy.2;uc009ghr.1;uc009ghs.1	102465635;18301;18301;18301;18301;18301;56188;56188;56188;56188;56188;56188;57780;57780	0;0;0;0;0;0;0;0;0;0;0;0;0;0
chr17	45523965	45557118	33154	*	9.12	8.62	9.5	-0.88	7.55e-15	4.02e-13	354	430.86	742.84	704.08	Promoter (<=1kb)	17	45555700	45563169	7470	1	18037	uc008cqv.3	0	ENSMUSG00000023947	Nfkbie	nuclear factor of kappa light polypeptide gene enhancer in B cells inhibitor, epsilon	uc008cqv.3;uc056zew.2;uc008cqu.2;uc008cqt.2;uc008cqr.1;uc012auc.1;uc008cqs.1	18037;18037;210573;21645;224805;224805;224805	0;0;0;0;17124;15100;8347
chr2	28902922	28923639	20718	*	8.65	8.05	9.08	-1.03	7.59e-15	4.02e-13	243	285.76	584.41	496.71	Promoter (<=1kb)	2	28907680	28916421	8742	2	54422	uc008izh.2	0	ENSMUSG00000026805	Barhl1	BarH like homeobox 1	uc008izg.2;uc008izh.2;uc012btd.1	227674;54422;54422	0;0;0
chr7	24941387	24962494	21108	*	8.47	7.83	8.92	-1.09	7.79e-15	4.11e-13	241	214.54	529.57	437.03	Distal Intergenic	7	24970010	24970075	66	2	102465633	uc033ixn.1	7581	ENSMUSG00000098802	Mir7046	microRNA 7046	NA	NA	NA
chr11	68380622	68412709	32088	*	9.22	8.76	9.56	-0.8	8.01e-15	4.21e-13	430	438.87	784.94	728.19	Promoter (<=1kb)	11	68209364	68386826	177463	2	18208	uc007jnm.1	0	ENSMUSG00000020902	Ntn1	netrin 1	uc007jnm.1	18208	0
chr4	9841750	9866800	25051	*	9.01	8.52	9.37	-0.85	9.49e-15	4.97e-13	372	363.21	690.21	634.76	Promoter (<=1kb)	4	9844372	9862345	17974	1	242316	uc008ryt.1	0	ENSMUSG00000051279	Gdf6	growth differentiation factor 6	uc008ryt.1	242316	0
chr9	58196253	58203927	7675	*	7.49	6.53	8.07	-1.54	9.79e-15	5.11e-13	97	87.24	307.99	228.46	Promoter (<=1kb)	9	58196297	58201715	5419	2	320563	uc009pwl.1	0	ENSMUSG00000051243	Islr2	immunoglobulin superfamily containing leucine-rich repeat 2	uc009pwl.1;uc012guf.1;uc012gug.1;uc009pwm.2;uc012guh.1;uc012gui.1;uc012guj.1;uc012guk.1;uc012gul.1	320563;320563;320563;320563;320563;320563;320563;320563;665268	0;0;0;0;0;0;0;0;0
chr13	53447652	53482001	34350	*	9.28	8.83	9.62	-0.79	9.98e-15	5.19e-13	443	468.25	822.05	756.52	Promoter (<=1kb)	13	53466881	53472780	5900	2	17702	uc007qnw.1	0	ENSMUSG00000021469	Msx2	msh homeobox 2	uc007qnl.2;uc007qnm.2;uc007qnn.2;uc007qnw.1	100040421;100040421;100040421;17702	0;0;0;0
chr18	64306589	64348057	41469	*	9.65	9.26	9.96	-0.7	1.02e-14	5.3e-13	623	602.67	1028.12	963.89	Promoter (<=1kb)	18	64340364	64398488	58125	1	225631	uc008fef.1	0	ENSMUSG00000045991	Onecut2	one cut domain, family member 2	uc008fef.1	225631	0
chr8	57221794	57390720	168927	*	11.93	11.75	12.09	-0.34	1.06e-14	5.44e-13	3482	3423.74	4435.99	4290.78	Promoter (<=1kb)	8	57304414	57320859	16446	2	102636514	uc033jfq.1	0	ENSMUSG00000100510	AV026068	expressed sequence AV026068	uc033jfq.1;uc009lss.2;uc057alk.1	102636514;15111;75996	0;0;0
chr4	154135728	154143669	7942	*	7.56	6.72	8.09	-1.37	1.07e-14	5.5e-13	106	105.04	287.5	256.8	Promoter (<=1kb)	4	154056249	154140208	83960	2	22062	uc008wbh.2	0	ENSMUSG00000029026	Trp73	transformation related protein 73	uc008wbh.2;uc008wbi.1;uc008wbj.1	22062;59002;59002	0;0;0
chr14	64579671	64597807	18137	*	8.54	7.92	8.97	-1.05	1.08e-14	5.54e-13	229	253.71	547.3	455.12	Promoter (<=1kb)	14	64591185	64591271	87	1	100526520	uc011znl.1	0	ENSMUSG00000092972	Mir3078	microRNA 3078	uc011znl.1;uc007uil.1;uc011znk.1	100526520;268755;387233	0;0;0
chr10	87472664	87502379	29716	*	9.24	8.79	9.58	-0.79	1.28e-14	6.54e-13	460	427.3	784.94	746.27	Promoter (<=1kb)	10	87491041	87493660	2620	2	17172	uc007gqs.1	0	ENSMUSG00000020052	Ascl1	achaete-scute family bHLH transcription factor 1	uc007gqs.1	17172	0
chr11	97006016	97027255	21240	*	8.58	7.98	9.01	-1.03	1.3e-14	6.59e-13	238	266.17	557.82	470.79	Promoter (<=1kb)	11	97020508	97026418	5911	2	100127433	uc007ldj.1	0	ENSMUSG00000087067	Gm11532	predicted gene 11532	uc007ldj.1;uc007ldk.2;uc007ldh.2;uc007ldi.2	100127433;217140;83395;83395	0;-2697;0;0
chr4	46329834	46355811	25978	*	9.03	8.55	9.39	-0.84	1.44e-14	7.29e-13	368	383.68	694.65	646.81	Promoter (<=1kb)	4	46344194	46345309	1116	1	110805	uc008sto.1	0	ENSMUSG00000070990	Foxe1	forkhead box E1	uc008sto.1	110805	0
chr12	111270494	111278859	8366	*	7.75	6.99	8.25	-1.26	1.82e-14	9.15e-13	120	134.42	303.56	303.81	Promoter (<=1kb)	12	111271096	111276426	5331	1	93835	uc007pcp.2	0	ENSMUSG00000021278	Amn	amnionless	uc007pcl.2;uc007pcn.2;uc007pco.2;uc007pcp.2;uc007pcq.1	22031;22031;22031;93835;93835	104124;104124;22011;0;0
chr11	53456358	53487871	31514	*	9.28	8.84	9.62	-0.79	1.85e-14	9.29e-13	463	450.45	828.7	749.29	Promoter (<=1kb)	11	53476578	53480195	3618	2	237761	uc007iwf.1	0	ENSMUSG00000044352	Sowaha	sosondowah ankyrin repeat domain family member A	uc007iwf.1;uc007iwb.1;uc007iwe.1;uc007iwc.2;uc007iwd.2	237761;71774;71774;71774;71774	0;0;0;0;0
chr5	111413332	111426772	13441	*	7.86	7.14	8.34	-1.2	1.91e-14	9.52e-13	145	137.98	321.84	326.12	Promoter (<=1kb)	5	111418166	111457025	38860	1	433938	uc008yse.1	0	ENSMUSG00000070576	Mn1	meningioma 1	uc008yse.1	433938	0
chr19	45709659	45751134	41476	*	9.49	9.05	9.82	-0.77	2.07e-14	1.03e-12	496	563.5	945.58	863.22	Promoter (<=1kb)	19	45736798	45742884	6087	2	14179	uc008hrg.2	0	ENSMUSG00000025219	Fgf8	fibroblast growth factor 8	uc008hrg.2;uc008hrh.2;uc008hri.2;uc012bmo.1;uc008hrk.1;uc029tsm.1;uc008hrm.1;uc008hrn.1	14179;14179;14179;14179;18150;71232;76055;76055	0;0;0;0;0;0;0;0
chr2	147351048	147393241	42194	*	9.65	9.25	9.96	-0.71	2.1e-14	1.04e-12	601	615.13	1048.62	946.41	Promoter (<=1kb)	2	147364994	147375049	10056	1	18503	uc008msx.3	0	ENSMUSG00000037034	Pax1	paired box 1	uc008msx.3;uc008msy.1;uc008msv.2	18503;18503;99041	0;0;0
chr7	49622425	49642696	20272	*	8.69	8.14	9.09	-0.95	2.54e-14	1.25e-12	260	304.45	571.12	522.03	Promoter (<=1kb)	7	49631499	49636835	5337	2	13172	uc009hbn.1	0	ENSMUSG00000030507	Dbx1	developing brain homeobox 1	uc009hbn.1	13172	0
chr2	25288394	25299371	10978	*	7.61	6.79	8.13	-1.33	2.71e-14	1.33e-12	109	113.06	298.02	261.02	Promoter (<=1kb)	2	25289911	25291193	1283	1	227618	uc008irg.2	0	ENSMUSG00000026961	Lrrc26	leucine rich repeat containing 26	uc008irh.3;uc008iri.3;uc008irk.3;uc008irg.2;uc008irj.1;uc008irf.2;uc008ird.2;uc008ire.2	14810;14810;14810;227618;320354;78217;99152;99152	0;0;0;0;0;0;15928;15883
chr5	143285097	143294612	9516	*	7.63	6.82	8.14	-1.32	2.76e-14	1.35e-12	119	107.72	297.47	267.04	Distal Intergenic	5	143249695	143270022	20328	2	54201	uc009ajw.2	-15075	ENSMUSG00000046658	Zfp316	zinc finger protein 316	NA	NA	NA
chr14	32451077	32470437	19361	*	8.38	7.75	8.81	-1.06	3.19e-14	1.56e-12	213	218.1	489.13	410.51	Promoter (<=1kb)	14	32408203	32465909	57707	2	12647	uc007syv.1	0	ENSMUSG00000021919	Chat	choline acetyltransferase	uc007syv.1;uc007syw.1;uc011zil.1;uc007syx.1;uc007syy.1;uc011zim.1;uc007syz.1;uc007sza.1;uc007szb.1	12647;12647;12647;12647;12647;12647;12647;12647;20508	0;0;0;0;0;0;0;0;0
chr7	40896293	40903564	7272	*	7.31	6.42	7.86	-1.44	3.36e-14	1.63e-12	85	86.35	233.76	231.48	Promoter (<=1kb)	7	40849153	40898324	49172	2	320210	uc009glg.2	0	ENSMUSG00000100600	A230077H06Rik	RIKEN cDNA A230077H06 gene	uc009glg.2;uc009glh.1	320210;58188	0;0
chr2	146822403	146842048	19646	*	8.81	8.29	9.19	-0.9	3.52e-14	1.71e-12	320	307.12	619.86	549.76	Distal Intergenic	2	146855889	146970089	114201	1	228730	uc008mso.1	-13841	ENSMUSG00000074749	Kiz	kizuna centrosomal protein	NA	NA	NA
chr7	19516654	19525652	8999	*	7.52	6.7	8.04	-1.33	3.7e-14	1.79e-12	104	104.15	267	258	Promoter (<=1kb)	7	19518731	19525050	6320	1	69547	uc009fme.2	0	ENSMUSG00000060621	Nkpd1	NTPase, KAP family P-loop domain containing 1	uc009fmb.1;uc009fmc.1;uc009fmd.1;uc009fme.2	67091;67091;67091;69547	7925;7925;7925;0
chr4	120264432	120272230	7799	*	7.43	6.57	7.96	-1.39	3.9e-14	1.87e-12	99	90.8	258.69	239.31	3' UTR	4	120267078	120287261	20184	2	329934	uc008unc.1	15031	ENSMUSG00000052135	Foxo6	forkhead box O6	uc008unc.1	329934	0
chr6	51164795	51193008	28214	*	9.18	8.73	9.52	-0.79	4.38e-14	2.1e-12	429	421.07	771.09	702.27	Distal Intergenic	6	51269812	51269910	99	2	387166	uc012elv.1	76902	ENSMUSG00000065505	Mir148a	microRNA 148a	NA	NA	NA
chr2	172532134	172562056	29923	*	9.06	8.56	9.42	-0.87	4.66e-14	2.23e-12	357	397.03	732.87	640.78	Promoter (<=1kb)	2	172549593	172558622	9030	1	21420	uc008ocz.3	0	ENSMUSG00000028640	Tfap2c	transcription factor AP-2, gamma	uc008ocz.3;uc008oda.3	21420;21420	0;0
chr3	93435502	93456209	20708	*	8.9	8.42	9.26	-0.84	4.76e-14	2.27e-12	334	350.74	606.02	617.88	Promoter (<=1kb)	3	93442330	93449077	6748	1	99681	uc012cti.1	0	ENSMUSG00000052415	Tchh	trichohyalin	uc012cti.1	99681	0
chr5	147717994	147730721	12728	*	8.17	7.53	8.62	-1.09	4.93e-14	2.34e-12	169	200.3	396.07	388.81	Promoter (<=1kb)	5	147562196	147725988	163793	2	14254	uc009aoh.1	0	ENSMUSG00000029648	Flt1	FMS-like tyrosine kinase 1	uc009aoh.1;uc009aoi.2	14254;14254	0;0
chr13	21976769	22023879	47111	*	9.86	9.49	10.14	-0.65	5.13e-14	2.42e-12	721	719.29	1180.46	1083.85	Promoter (<=1kb)	13	21981181	21985907	4727	1	195236	uc011ywx.2	0	ENSMUSG00000016982	Pom121l2	POM121 membrane glycoprotein-like 2 (rat)	uc011ywx.2;uc011ywy.1;uc007prz.1	195236;195236;54373	0;0;0
chr2	127329533	127367032	37500	*	9.29	8.85	9.62	-0.77	5.76e-14	2.7e-12	435	488.72	804.88	772.2	Promoter (<=1kb)	2	127363286	127367221	3936	1	11552	uc008mfi.1	0	ENSMUSG00000058620	Adra2b	adrenergic receptor, alpha 2b	uc008mfi.1;uc008mff.1;uc008mfg.3;uc008mfh.4;uc029uen.3	11552;13537;215095;215095;215095	0;0;0;0;0
chr4	152274823	152298762	23940	*	8.64	8.09	9.03	-0.95	5.76e-14	2.7e-12	257	287.54	551.73	496.71	Promoter (<=1kb)	4	152285972	152291662	5691	2	15207	uc008wac.1	0	ENSMUSG00000028946	Hes3	hes family bHLH transcription factor 3	uc008wab.1;uc008wac.1;uc008wad.2;uc029vba.1;uc008vzx.2;uc008vzy.2;uc008vzz.2;uc008waa.2	100129;15207;57295;57295;70025;70025;70025;70025	0;0;0;0;0;88689;74979;51760
chr8	15006502	15032263	25762	*	8.77	8.24	9.15	-0.92	6.52e-14	3.04e-12	303	300	610.45	527.46	Promoter (<=1kb)	8	15011025	15033333	22309	1	74901	uc009kzk.3	0	ENSMUSG00000055675	Kbtbd11	kelch repeat and BTB (POZ) domain containing 11	uc009kzk.3	74901	0
chr9	21028704	21050820	22117	*	8.62	8.03	9.03	-1.01	6.54e-14	3.04e-12	241	280.42	568.9	478.63	Promoter (<=1kb)	9	21032251	21032328	78	2	100316681	uc012gpa.1	0	ENSMUSG00000084663	Mir1900	microRNA 1900	uc012gpa.1;uc009ojx.2;uc009oka.2;uc009ojy.1;uc009ojz.1	100316681;15894;15898;78369;78369	0;0;0;0;0
chr5	140602628	140612797	10170	*	7.76	6.95	8.27	-1.32	7.59e-14	3.52e-12	113	134.42	341.78	276.09	Promoter (<=1kb)	5	140607341	140615545	8205	1	16848	uc009ahu.1	0	ENSMUSG00000029570	Lfng	LFNG O-fucosylpeptide 3-beta-N-acetylglucosaminyltransferase	uc009ahu.1;uc009ahv.1	16848;16848	0;0
chr12	80745735	80761280	15546	*	8.32	7.73	8.73	-1	7.89e-14	3.65e-12	222	203.86	424.88	426.79	Promoter (<=1kb)	12	80755447	80760715	5269	2	380768	uc007obh.2	0	ENSMUSG00000062961	Ccdc177	coiled-coil domain containing 177	uc007obh.2	380768	0
chr8	125830494	126104747	274254	*	12.38	12.23	12.52	-0.29	8e-14	3.68e-12	4727	4881.91	6008.08	5767.65	Promoter (<=1kb)	8	125897914	125908144	10231	1	102632990	uc009nyp.1	0	NA	A730098A19Rik	RIKEN cDNA A730098A19 gene	uc009nyp.1;uc009nyr.4;uc009nyq.1;uc009nym.1;uc009nyn.2;uc009nyo.1	102632990;16525;234878;270109;270109;270109	0;0;0;0;0;0
chr18	65927157	65943066	15910	*	8.35	7.73	8.78	-1.05	8.73e-14	4.01e-12	229	195.85	467.53	409.91	Promoter (<=1kb)	18	65934639	65939089	4451	2	19434	uc008ffl.1	0	ENSMUSG00000024518	Rax	retina and anterior neural fold homeobox	uc008ffl.1	19434	0
chr5	119774217	119819896	45680	*	9.61	9.22	9.91	-0.7	9.3e-14	4.25e-12	583	606.23	1004.86	921.69	Exon (uc008zgx.1/uc008zgx.1, exon 1 of 2)	5	119834663	119885218	50556	1	21388	uc008zgz.2	-14767	ENSMUSG00000018263	Tbx5	T-box 5	NA	NA	NA
chr19	6923976	6937006	13031	*	8.12	7.49	8.56	-1.07	9.75e-14	4.44e-12	179	180.71	386.1	366.51	Promoter (<=1kb)	19	6925690	6934515	8826	2	16528	uc008gjj.1	0	ENSMUSG00000024957	Kcnk4	potassium channel, subfamily K, member 4	uc008gjk.2;uc012bhq.1;uc008gjl.1;uc008gjm.1;uc008gjn.2;uc008gjj.1;uc008gjg.1;uc008gjh.1;uc012bhp.1;uc057lae.1;uc008gji.1	107173;107173;107173;107173;12015;16528;26379;26379;67077;67077;67077	4187;4187;4501;5444;-4855;0;-2168;-2168;0;0;0
chr1	4487396	4514323	26928	*	9.26	8.82	9.6	-0.78	1.01e-13	4.56e-12	477	424.63	805.99	743.26	Promoter (<=1kb)	1	4490928	4493735	2808	2	20671	uc007aey.1	0	ENSMUSG00000025902	Sox17	SRY (sex determining region Y)-box 17	uc007aey.1;uc007aez.2;uc007afa.2;uc007afb.2;uc007afc.2;uc033fhy.1	20671;20671;20671;20671;20671;20671	0;0;0;0;0;0
chr11	11994573	12055041	60469	*	10.38	10.08	10.63	-0.55	1.01e-13	4.56e-12	1116	1044.22	1615.3	1543.19	Promoter (<=1kb)	11	11930499	12027971	97473	2	14783	uc007iaz.2	0	ENSMUSG00000020176	Grb10	growth factor receptor bound protein 10	uc007iaz.2;uc007iba.2;uc007ibb.2;uc007ibc.1	14783;14783;14783;14783	0;0;0;0
chr4	41724786	41734143	9358	*	7.66	6.89	8.15	-1.26	1.21e-13	5.46e-12	109	128.19	286.94	282.72	Promoter (<=1kb)	4	41723836	41730286	6451	2	550619	uc012dce.1	0	ENSMUSG00000066224	Arid3c	AT rich interactive domain 3C (BRIGHT-like)	uc008sjk.2;uc008sjl.2;uc012dcg.2;uc033ibk.1;uc033ibl.1;uc033ibm.1;uc033ibn.1;uc057lhk.1;uc008sji.2;uc012dcd.1;uc012dce.1;uc012dcf.1;uc008sjj.1;uc029uqk.1	18391;18391;18391;18391;18391;18391;18391;18391;53598;53598;550619;550619;550619;550619	7216;7216;7216;7216;7216;7216;7216;7216;-1623;-1623;0;0;0;0
chr4	141237477	141254172	16696	*	8.26	7.64	8.7	-1.06	1.28e-13	5.73e-12	182	217.21	433.18	397.25	Promoter (<=1kb)	4	141242884	141257562	14679	1	213649	uc008vob.1	0	ENSMUSG00000028919	Arhgef19	Rho guanine nucleotide exchange factor (GEF) 19	uc008vob.1	213649	0
chr7	141459420	141466865	7446	*	7.29	6.41	7.83	-1.42	1.36e-13	6.07e-12	86	83.68	233.21	221.23	Promoter (<=1kb)	7	141461094	141466602	5509	1	213573	uc009klj.2	0	ENSMUSG00000048200	Cracr2b	calcium release activated channel regulator 2B	uc012fxf.1;uc012fxg.1;uc012fxh.1;uc009kll.2;uc009klj.2;uc009klm.2;uc009klg.2;uc009klh.2;uc009kli.2;uc012fxe.1	100126795;12476;12476;12476;213573;66491;66853;66853;66853;66853	0;-497;-497;-1924;0;8288;0;0;0;0
chr14	118209961	118244814	34854	*	9.58	9.2	9.89	-0.69	1.4e-13	6.26e-12	582	593.77	980.48	910.84	Promoter (<=1kb)	14	118236232	118238759	2528	1	105245869	uc007uyu.1	0	ENSMUSG00000090534	LOC105245869	uncharacterized LOC105245869	uc007uyu.1;uc057bfo.1;uc007uyt.3	105245869;105245869;223227	0;0;0
chr15	102354074	102376299	22226	*	8.67	8.16	9.05	-0.89	1.41e-13	6.28e-12	279	294.66	543.97	516	Promoter (<=1kb)	15	102357177	102366271	9095	2	170574	uc007xvm.1	0	ENSMUSG00000060284	Sp7	Sp7 transcription factor 7	uc007xvm.1;uc007xvn.1;uc007xvl.2	170574;170574;223921	0;0;-3315
chr2	57097311	57131121	33811	*	9.34	8.91	9.67	-0.76	1.59e-13	7.03e-12	474	488.72	858.06	767.37	Promoter (<=1kb)	2	57107226	57115038	7813	2	18227	uc008jrw.2	0	ENSMUSG00000026826	Nr4a2	nuclear receptor subfamily 4, group A, member 2	uc008jrw.2;uc012bvn.1;uc008jrx.2;uc008jry.2;uc029txk.1	18227;18227;18227;18227;767815	0;0;0;0;0
chr9	87710583	87746642	36060	*	9.64	9.26	9.95	-0.69	1.81e-13	8.01e-12	643	583.98	1022.03	952.43	Promoter (<=1kb)	9	87702800	87731260	28461	2	76365	uc009qyh.2	0	ENSMUSG00000032419	Tbx18	T-box18	uc009qyh.2	76365	0
chr8	23145611	23165613	20003	*	8.54	8	8.94	-0.94	1.85e-13	8.15e-12	252	259.94	518.49	462.96	Promoter (<=1kb)	8	23138785	23149585	10801	2	101056408	uc033jer.1	0	ENSMUSG00000086741	Gm15816	predicted gene 15816	uc012gbj.1;uc033jer.1;uc009lee.3;uc009lef.3;uc009leg.2;uc009leh.2;uc009lei.2;uc009lej.2;uc012gbg.2;uc012gbh.2;uc009lek.2;uc009lel.2;uc009lem.2;uc012gbi.1;uc009len.1	100526510;101056408;11733;11733;11733;11733;11733;11733;11733;11733;11733;11733;11733;723876;74561	-2949;0;0;0;0;0;0;0;0;0;0;0;0;3056;0
chr3	96312592	96347343	34752	*	10.07	9.76	10.34	-0.58	1.99e-13	8.73e-12	857	872.4	1319.5	1264.69	Promoter (<=1kb)	3	96345287	96358480	13194	1	100504145	uc008qms.1	0	ENSMUSG00000097851	Platr30	pluripotency associated transcript 30	uc008qms.1;uc008qmu.1;uc008qmt.1	100504145;100504145;102632400	0;-2584;9751
chr2	152931952	152963287	31336	*	8.94	8.48	9.29	-0.82	2.05e-13	8.96e-12	356	356.08	652.55	602.2	Promoter (<=1kb)	2	152931898	152933208	1311	2	14239	uc008ngt.1	0	ENSMUSG00000074676	Foxs1	forkhead box S1	uc008ngt.1;uc012cgl.1;uc008ngu.2;uc012cgm.4;uc008ngv.1;uc008ngw.1;uc012cgn.1;uc008ngx.1	14239;252864;252864;252864;74711;74711;74711;74711	0;0;0;0;0;0;0;0
chr18	35898978	35941353	42376	*	9.47	9.07	9.78	-0.71	2.22e-13	9.68e-12	544	529.67	918.44	839.11	Exon (uc008emz.1/uc008emz.1, exon 1 of 2)	18	35964830	36014715	49886	1	74002	uc008ena.4	-23477	ENSMUSG00000024347	Psd2	pleckstrin and Sec7 domain containing 2	NA	NA	NA
chr18	38586065	38605670	19606	*	8.71	8.18	9.09	-0.92	2.49e-13	1.08e-11	306	272.4	582.2	509.37	Promoter (<=1kb)	18	38586265	38601268	15004	2	24066	uc008esl.1	0	ENSMUSG00000024427	Spry4	sprouty RTK signaling antagonist 4	uc008esl.1	24066	0
chr5	67088571	67108563	19993	*	8.88	8.42	9.23	-0.81	2.51e-13	1.09e-11	347	339.17	602.69	601	Promoter (<=1kb)	5	67094397	67099126	4730	2	18935	uc008xpm.1	0	ENSMUSG00000012520	Phox2b	paired-like homeobox 2b	uc008xpm.1;uc008xpn.1	18935;18935	0;0
chr4	123173339	123218639	45301	*	9.59	9.22	9.89	-0.67	2.52e-13	1.09e-11	596	594.66	974.94	918.68	Promoter (<=1kb)	4	123183504	123194699	11196	1	170638	uc008uox.1	0	ENSMUSG00000046093	Hpcal4	hippocalcin-like 4	uc008uox.1;uc008uoy.1	170638;230718	0;0
chr1	19200423	19251749	51327	*	9.93	9.59	10.21	-0.62	2.89e-13	1.24e-11	788	752.23	1236.4	1135.69	Promoter (<=1kb)	1	19208914	19238845	29932	1	21419	uc007akq.2	0	ENSMUSG00000025927	Tfap2b	transcription factor AP-2 beta	uc007akq.2;uc007akr.2;uc007aks.1;uc007akt.2;uc007aku.2	21419;21419;21419;21419;21419	0;0;0;0;0
chr4	138389698	138421809	32112	*	9.07	8.62	9.42	-0.8	2.92e-13	1.25e-11	372	413.06	715.14	655.85	Promoter (<=1kb)	4	138394092	138396458	2367	2	625638	uc008vkx.2	0	ENSMUSG00000078235	Fam43b	family with sequence similarity 43, member B	uc008vkx.2	625638	0
chr6	8938063	8961909	23847	*	8.97	8.53	9.31	-0.79	3.44e-13	1.47e-11	369	368.55	646.45	626.32	Promoter (<=1kb)	6	8948614	8952430	3817	1	18231	uc009aya.1	0	ENSMUSG00000046178	Nxph1	neurexophilin 1	uc009aya.1;uc009ayb.1;uc009ayc.1	18231;18231;18231	0;0;0
chr8	109991125	110587444	596320	*	13.48	13.35	13.59	-0.24	3.5e-13	1.49e-11	10253	10674.5	12493.1	12160.4	Promoter (<=1kb)	8	110495366	110502356	6991	2	100861869	uc009nkt.1	0	NA	Gm21283	predicted gene, 21283	uc009nkt.1;uc009nkn.1;uc009nko.1;uc009njs.2;uc009njv.2;uc009njw.2;uc009nkp.2;uc009nkq.1;uc009nkr.1;uc009nks.1;uc009njt.2;uc057ana.1	100861869;12308;12308;234724;234725;234725;234728;244653;244653;244653;26887;77171	0;0;0;0;0;0;0;0;0;0;0;0
chr2	105113424	105153156	39733	*	9.5	9.08	9.83	-0.75	3.79e-13	1.61e-11	570	510.09	972.17	845.74	Promoter (<=1kb)	2	105126529	105173614	47086	1	22431	uc008lko.2	0	ENSMUSG00000016458	Wt1	Wilms tumor 1 homolog	uc008lko.2;uc008lkp.1;uc008lkn.1	22431;22431;329480	0;0;0
chr11	85867112	85901358	34247	*	9.32	8.91	9.64	-0.73	3.81e-13	1.61e-11	480	479.82	833.13	761.34	Promoter (<=1kb)	11	85890063	85916097	26035	1	21387	uc007ksc.2	0	ENSMUSG00000000094	Tbx4	T-box 4	uc007ksc.2;uc007ksd.2	21387;21387	0;0
chr9	108099919	108116146	16228	*	8.03	7.38	8.48	-1.09	4.62e-13	1.95e-11	168	165.58	379.45	332.75	3' UTR	9	108096022	108190383	94362	2	12217	uc009rov.1	74237	ENSMUSG00000032589	Bsn	bassoon	uc009rov.1	12217	0
chr19	7163198	7171019	7822	*	7.29	6.43	7.82	-1.38	4.66e-13	1.96e-11	84	89.02	228.78	223.04	Intron (uc008gkg.2/107227, intron 3 of 10)	19	7056768	7198062	141295	1	107227	uc008gkg.2	106430	ENSMUSG00000036278	Macrod1	MACRO domain containing 1	uc008gkg.2	107227	0
chr13	40698134	40716614	18481	*	8.5	7.97	8.89	-0.92	4.8e-13	2.01e-11	241	261.72	488.58	461.75	3' UTR	13	40715303	40725187	9885	2	21418	uc007qed.3	8573	ENSMUSG00000021359	Tfap2a	transcription factor AP-2, alpha	uc007qed.3;uc007qee.3;uc007qef.3;uc007qej.3;uc056ytm.1;uc007qeh.1;uc007qei.1;uc011yyq.1	21418;21418;21418;21418;21418;21418;21418;21418	0;0;0;0;0;0;0;0
chr7	143499077	143506521	7445	*	7.25	6.39	7.79	-1.4	4.85e-13	2.02e-11	82	85.46	227.12	215.8	Promoter (<=1kb)	7	143501548	143502524	977	2	22113	uc009kpj.1	0	ENSMUSG00000010760	Phlda2	pleckstrin homology like domain, family A, member 2	uc009kpg.2;uc009kph.2;uc009kpi.2;uc009kpj.1	18400;18400;18400;22113	0;0;0;0
chr19	24890804	24910175	19372	*	8.75	8.25	9.12	-0.87	5.14e-13	2.14e-11	319	291.1	582.2	529.26	Promoter (<=1kb)	19	24898965	24901309	2345	2	14237	uc008hav.1	0	ENSMUSG00000051490	Foxd4	forkhead box D4	uc008hav.1	14237	0
chr1	172324090	172357120	33031	*	9	8.56	9.34	-0.77	5.9e-13	2.45e-11	374	381.9	657.53	635.36	Promoter (<=1kb)	1	172341210	172374085	32876	1	16513	uc007dqj.1	0	ENSMUSG00000044708	Kcnj10	potassium inwardly-rectifying channel, subfamily J, member 10	uc007dqb.2;uc007dqe.2;uc007dqj.1;uc007dqg.1;uc007dqh.1;uc007dqi.1	140559;140559;16513;16524;16524;16524	62458;11723;0;0;0;0
chr2	61802434	61837932	35499	*	9.59	9.21	9.88	-0.67	6.31e-13	2.61e-11	581	604.45	983.81	906.02	Promoter (<=1kb)	2	61804453	61814114	9662	1	21375	uc008jvd.2	0	ENSMUSG00000035033	Tbr1	T-box brain gene 1	uc008jvd.2;uc008jvc.1	21375;59029	0;90740
chr9	21240674	21252550	11877	*	8.03	7.39	8.47	-1.08	6.63e-13	2.73e-11	170	166.47	376.13	334.56	Promoter (<=1kb)	9	21242917	21248443	5527	2	94226	uc009oks.2	0	ENSMUSG00000045087	S1pr5	sphingosine-1-phosphate receptor 5	uc009oko.2;uc009okp.2;uc009okq.2;uc009okr.2;uc009oks.2	50868;50868;50868;50868;94226	-1342;-1342;-1342;-1342;0
chr18	42375422	42408397	32976	*	9.32	8.91	9.64	-0.73	7.06e-13	2.9e-11	506	454.9	829.81	769.18	Promoter (<=1kb)	18	42394597	42396093	1497	1	18998	uc008etv.2	0	ENSMUSG00000024497	Pou4f3	POU domain, class 4, transcription factor 3	uc008etv.2	18998	0
chr12	49357398	49416523	59126	*	10.34	10.05	10.58	-0.53	7.11e-13	2.91e-11	1086	1040.65	1566	1497.37	Promoter (<=1kb)	12	49382883	49386867	3985	1	15228	uc011ylr.1	0	ENSMUSG00000020950	Foxg1	forkhead box G1	uc011ylr.1;uc007nmf.2;uc007nmg.1;uc007nmi.2	15228;15228;67293;67293	0;0;0;0
chr7	49903534	49918301	14768	*	8.31	7.75	8.72	-0.97	7.72e-13	3.15e-11	210	219.88	440.94	402.67	Promoter (<=1kb)	7	49910299	49959493	49195	1	104245	uc009hbv.3	0	ENSMUSG00000039728	Slc6a5	solute carrier family 6 (neurotransmitter transporter, glycine), member 5	uc009hbv.3;uc012fle.1	104245;104245	0;0
chr14	34811489	34824583	13095	*	8.03	7.39	8.47	-1.08	7.94e-13	3.23e-11	159	177.15	370.59	338.78	Promoter (<=1kb)	14	34820136	35581115	760980	1	14803	uc007tbj.1	0	ENSMUSG00000041078	Grid1	glutamate receptor, ionotropic, delta 1	uc007tbj.1	14803	0
chr5	120404728	120451466	46739	*	9.83	9.21	10.27	-1.06	8.55e-13	3.47e-11	578	603.56	1347.75	1113.38	Promoter (<=1kb)	5	120431886	120441457	9572	1	16873	uc012ecn.1	0	ENSMUSG00000029595	Lhx5	LIM homeobox protein 5	uc012ecn.1	16873	0
chr17	34659718	34682114	22397	*	8.61	8.07	9	-0.93	8.88e-13	3.59e-11	251	284.87	547.85	474.41	Promoter (<=1kb)	17	34670535	34719815	49281	1	81877	uc012aqk.1	0	ENSMUSG00000033327	Tnxb	tenascin XB	uc008cdh.4;uc012aqj.2;uc012aqk.1	12915;12915;81877	12572;12572;0
chr6	85500755	85516198	15444	*	8.08	7.47	8.5	-1.04	8.95e-13	3.61e-11	173	180.71	372.8	353.24	Promoter (<=1kb)	6	85511122	85513542	2421	2	13656	uc009cpy.1	0	ENSMUSG00000071341	Egr4	early growth response 4	uc009cpy.1;uc009cpw.3;uc009cpx.3;uc033isv.2	13656;330369;330369;330369	0;0;0;0
chr13	72618488	72653561	35074	*	9.36	8.97	9.67	-0.7	9.5e-13	3.82e-11	521	483.38	833.69	798.72	Promoter (<=1kb)	13	72628797	72634196	5400	1	16372	uc007rde.2	0	ENSMUSG00000001504	Irx2	Iroquois homeobox 2	uc007rde.2;uc011zbn.1	16372;328287	0;0
chr9	37525943	37566673	40731	*	9.46	9.08	9.76	-0.67	1.09e-12	4.37e-11	531	552.82	884.65	845.74	Promoter (<=1kb)	9	37539255	37544205	4951	1	57276	uc009ovb.1	0	ENSMUSG00000001943	Vsig2	V-set and immunoglobulin domain containing 2	uc009ouy.2;uc009ovb.1;uc012gra.1;uc012grb.1;uc009ovc.1;uc009ouz.2;uc009ova.2	235184;57276;57276;57276;64011;69524;69524	36622;0;0;0;0;0;0
chr12	84566389	84575121	8733	*	7.64	6.89	8.13	-1.24	1.11e-12	4.43e-11	122	115.73	302.45	258	Promoter (<=1kb)	12	84569828	84595457	25630	1	12677	uc007ofm.2	0	ENSMUSG00000021239	Vsx2	visual system homeobox 2	uc007ofm.2;uc007ofn.2	12677;12677	0;0
chr5	31087003	31102943	15941	*	8.39	7.84	8.78	-0.95	1.18e-12	4.7e-11	246	210.98	440.94	439.45	Promoter (<=1kb)	5	31086106	31093527	7422	2	22784	uc008wxa.3	0	ENSMUSG00000029151	Slc30a3	solute carrier family 30 (zinc transporter), member 3	uc008wxa.3	22784	0
chr7	3412144	3425837	13694	*	8	7.33	8.45	-1.12	1.2e-12	4.75e-11	151	171.81	377.24	322.5	Promoter (<=1kb)	7	3415066	3415156	91	1	104795667	uc057afj.1	0	ENSMUSG00000094210	Gm23450	predicted gene, 23450	uc057afj.1;uc009euy.2;uc009eux.3;uc029wda.3	104795667;54378;70230;81905	0;0;0;0
chr7	132595085	132610266	15182	*	8.31	7.74	8.72	-0.97	1.33e-12	5.28e-11	209	219.88	442.6	397.85	Promoter (<=1kb)	7	132596239	132599637	3399	2	20231	uc009kcc.1	0	ENSMUSG00000048528	Nkx1-2	NK1 homeobox 2	uc009kcc.1;uc009kce.1	20231;76429	0;-377
chr10	81251784	81261340	9557	*	7.43	6.62	7.95	-1.32	1.35e-12	5.33e-11	102	95.25	265.89	227.26	Promoter (<=1kb)	10	81252935	81262981	10047	1	17179	uc007ggt.1	0	ENSMUSG00000004933	Matk	megakaryocyte-associated tyrosine kinase	uc007ggs.2;uc007ggt.1;uc007ggu.2;uc007ggv.2;uc007ggw.2;uc007ggx.2;uc007ggy.1	103406;17179;17179;17179;17179;17179;66047	0;0;0;0;0;0;5586
chr8	70787119	70847032	59914	*	10.2	9.87	10.47	-0.6	1.38e-12	5.44e-11	954	917.81	1514.48	1321.95	Promoter (<=1kb)	8	70798135	70798192	58	1	102466823	uc033jfz.1	0	ENSMUSG00000099031	Mir7240	microRNA 7240	uc033jfz.1;uc009mbr.3;uc012gfh.1;uc009mbp.2;uc009mbq.1;uc009mbs.1;uc009mbt.1;uc012gfj.1;uc009mbv.2;uc009mbw.2;uc009mbx.2	102466823;16161;546071;546071;546071;70807;70807;84036;84036;84036;84036	0;0;-3521;0;0;0;0;0;0;0;0
chr12	107992645	108014481	21837	*	8.43	7.89	8.82	-0.93	1.5e-12	5.89e-11	234	239.47	478.61	426.18	Promoter (<=1kb)	12	107910403	108003414	93012	2	58208	uc007ozh.1	0	ENSMUSG00000048251	Bcl11b	B cell leukemia/lymphoma 11B	uc007ozh.1;uc007ozi.1;uc011yrp.1	58208;58208;58208	0;0;0
chr11	103767577	103781260	13684	*	8.08	7.46	8.51	-1.05	1.52e-12	5.95e-11	178	173.59	388.32	340.59	Promoter (<=1kb)	11	103774175	103818021	43847	1	22415	uc007lvs.2	0	ENSMUSG00000000125	Wnt3	wingless-type MMTV integration site family, member 3	uc007lvs.2	22415	0
chr5	24520595	24542518	21924	*	8.46	7.95	8.84	-0.9	1.54e-12	6e-11	241	251.93	469.19	450.3	Promoter (<=1kb)	5	24532697	24540457	7761	2	117590	uc008wry.2	0	ENSMUSG00000038204	Asb10	ankyrin repeat and SOCS box-containing 10	uc008wry.2;uc057btj.1;uc008wrx.1;uc008wrz.2;uc008wsa.2;uc012dtc.1	117590;117590;231044;231045;231045;231045	0;0;0;10240;12951;12951
chr14	61680453	61693202	12750	*	8.05	7.44	8.48	-1.04	1.71e-12	6.62e-11	173	173.59	373.91	339.98	Promoter (<=1kb)	14	61602836	61682373	79538	2	668253	uc007ugb.2	0	ENSMUSG00000097589	Dleu2	deleted in lymphocytic leukemia, 2	uc007ugb.2;uc007ugc.2;uc007ugi.2	668253;668253;668253	0;0;0
chr5	119828549	119848262	19714	*	8.53	7.97	8.93	-0.95	1.92e-12	7.45e-11	235	267.06	527.36	445.47	Promoter (<=1kb)	5	119834663	119885218	50556	1	21388	uc008zgz.2	0	ENSMUSG00000018263	Tbx5	T-box 5	uc008zgz.2	21388	0
chr2	180770810	180797365	26556	*	8.7	8.21	9.07	-0.86	1.96e-12	7.57e-11	296	296.44	567.79	504.55	Promoter (<=1kb)	2	180774381	180776900	2520	2	140489	uc008okb.2	0	ENSMUSG00000045493	Bhlhe23	basic helix-loop-helix family, member e23	uc008okb.2	140489	0
chr5	108350919	108378886	27968	*	9.07	8.64	9.41	-0.76	1.97e-12	7.6e-11	383	416.62	703.51	653.44	5' UTR	5	108388373	108431743	43371	1	18587	uc008ynz.2	-9487	ENSMUSG00000029491	Pde6b	phosphodiesterase 6B, cGMP, rod receptor, beta polypeptide	uc008ynu.2;uc008ynv.2	433931;433931	37994;37994
chr4	117468145	117497750	29606	*	8.88	8.44	9.23	-0.79	2.25e-12	8.64e-11	362	330.27	609.34	587.74	Promoter (<=1kb)	4	117271463	117497052	225590	2	66743	uc008uip.2	0	ENSMUSG00000028677	Rnf220	ring finger protein 220	uc008uip.2;uc008uiq.2;uc008uir.2	66743;66743;66743	0;0;0
chr17	15369701	15397765	28065	*	9.18	8.76	9.51	-0.75	2.26e-12	8.64e-11	432	434.42	771.64	685.39	Promoter (<=1kb)	17	15367354	15375823	8470	2	13388	uc008aoi.2	0	ENSMUSG00000014773	Dll1	delta like canonical Notch ligand 1	uc008aoi.2;uc008aoj.2;uc008aok.2	13388;67544;67544	0;0;0
chr11	44608743	44622918	14176	*	8	7.36	8.44	-1.09	2.38e-12	9.1e-11	171	156.68	373.91	321.3	Promoter (<=1kb)	11	44618100	44646820	28721	1	13591	uc007inj.2	0	ENSMUSG00000057098	Ebf1	early B cell factor 1	uc007inj.2;uc007ink.2;uc007inl.2;uc007inm.2;uc007inn.2	13591;13591;13591;13591;13591	0;0;0;0;0
chr2	104406602	104421772	15171	*	8.08	7.47	8.51	-1.04	2.45e-12	9.31e-11	176	178.93	386.1	341.79	Promoter (<=1kb)	2	104143073	104410334	267262	2	241589	uc008ljr.2	0	ENSMUSG00000068373	D430041D05Rik	RIKEN cDNA D430041D05 gene	uc008lju.3;uc008ljv.3;uc008ljr.2	15259;15259;241589	0;0;0
chr12	56661709	56714436	52728	*	10.02	9.68	10.29	-0.62	2.55e-12	9.68e-11	869	768.25	1314.51	1197.17	Promoter (<=1kb)	12	56695471	56712822	17352	1	18511	uc007npi.2	0	ENSMUSG00000001497	Pax9	paired box 9	uc007npi.2;uc011ymc.1;uc007npj.2	18511;217593;217593	0;0;0
chr11	100953507	100981495	27989	*	8.89	8.44	9.23	-0.79	2.71e-12	1.02e-10	362	333.83	623.74	581.11	Promoter (<=1kb)	11	100956736	100970617	13882	2	19285	uc007lmr.2	0	ENSMUSG00000004044	Cavin1	caveolae associated 1	uc007lmr.2;uc007lms.1	19285;19285	0;0
chr16	35150815	35163074	12260	*	7.87	7.21	8.31	-1.1	2.99e-12	1.13e-10	142	154.9	332.37	304.42	Promoter (<=1kb)	16	35155636	35304549	148914	1	224129	uc007zbj.1	0	ENSMUSG00000022840	Adcy5	adenylate cyclase 5	uc007zbj.1	224129	0
chr2	131540510	131577825	37316	*	9.28	8.88	9.58	-0.7	3.05e-12	1.15e-10	452	492.29	766.11	769.78	Promoter (<=1kb)	2	131545357	131562285	16929	2	11550	uc008mlu.1	0	ENSMUSG00000027335	Adra1d	adrenergic receptor, alpha 1d	uc008mlu.1	11550	0
chr4	109650214	109670977	20764	*	8.91	8.47	9.24	-0.77	3.15e-12	1.18e-10	361	347.18	620.42	590.15	Promoter (<=1kb)	4	109660876	109665372	4497	2	12580	uc008ucr.1	0	ENSMUSG00000028551	Cdkn2c	cyclin dependent kinase inhibitor 2C	uc008ucr.1;uc008ucs.2	12580;12580	0;0
chr2	130570802	130582566	11765	*	8.07	7.43	8.51	-1.08	3.16e-12	1.18e-10	170	175.37	400.5	329.13	Promoter (<=1kb)	2	130576169	130577054	886	1	18429	uc008mjg.3	0	ENSMUSG00000027301	Oxt	oxytocin	uc008mjh.2;uc008mjg.3	11998;18429	0;0
chr12	111441624	111453086	11463	*	7.86	7.19	8.32	-1.13	3.38e-12	1.26e-10	133	158.46	339.57	300.2	Promoter (<=1kb)	12	111442661	111455018	12358	1	21928	uc007pcy.2	0	ENSMUSG00000021281	Tnfaip2	tumor necrosis factor, alpha-induced protein 2	uc007pcy.2;uc007pcz.2	21928;21928	0;0
chr10	81275650	81292053	16404	*	7.97	7.32	8.42	-1.1	3.38e-12	1.26e-10	172	147.77	368.37	316.47	Promoter (<=1kb)	10	81273188	81285781	12594	2	27375	uc033frl.1	0	ENSMUSG00000034917	Tjp3	tight junction protein 3	uc011xje.1;uc007ghc.3;uc007ghd.3;uc007ghe.3;uc011xjf.2;uc033frl.1;uc007gha.2;uc007ghb.2;uc007ggz.2	100526465;18717;18717;18717;18717;27375;27375;27375;57267	4053;-910;-910;-910;-910;0;0;0;7478
chr5	119656456	119666906	10451	*	7.82	7.14	8.28	-1.13	3.39e-12	1.26e-10	151	131.75	327.94	291.76	Distal Intergenic	5	119670862	119684724	13863	1	21386	uc008zgw.2	-3956	ENSMUSG00000018604	Tbx3	T-box 3	uc008zgw.2;uc008zgu.2;uc033ilr.1	21386;21386;21386	0;0;0
chr7	5043805	5059477	15673	*	8.24	7.69	8.64	-0.95	3.57e-12	1.32e-10	212	201.19	404.38	393.03	Promoter (<=1kb)	7	5056152	5060785	4634	1	232821	uc009ezq.2	0	ENSMUSG00000035228	Ccdc106	coiled-coil domain containing 106	uc009ezt.3;uc009ezu.3;uc009ezq.2;uc009ezr.3;uc009ezs.3;uc057afr.2;uc009ezp.2	22185;22185;232821;232821;232821;232821;68992	-2666;-2666;0;0;0;0;0
chr17	44727770	44746774	19005	*	8.69	8.21	9.05	-0.84	3.63e-12	1.34e-10	297	293.77	559.48	500.93	Promoter (<=1kb)	17	44603989	44736648	132660	2	12393	uc008cpy.3	0	ENSMUSG00000039153	Runx2	runt related transcription factor 2	uc008cpy.3;uc008cpz.3;uc012aty.2;uc008cqa.3;uc008cqi.3;uc008cqb.3;uc008cqc.3;uc008cqd.2	12393;12393;12393;12393;12393;12393;12393;12393	0;0;0;0;0;0;0;0
chr8	75182380	75218867	36488	*	9.48	9.09	9.78	-0.7	3.63e-12	1.34e-10	499	587.54	876.34	886.73	Promoter (<=1kb)	8	75213944	75224113	10170	1	75141	uc009mhg.2	0	ENSMUSG00000034472	Rasd2	RASD family, member 2	uc009mhg.2	75141	0
chr7	19465208	19478265	13058	*	7.74	7.06	8.2	-1.13	3.89e-12	1.43e-10	143	124.63	292.48	294.77	Distal Intergenic	7	19426075	19458494	32420	2	232944	uc012fbe.1	-6714	ENSMUSG00000030397	Mark4	MAP/microtubule affinity regulating kinase 4	NA	NA	NA
chr19	5736383	5758437	22055	*	8.65	8.14	9.03	-0.89	4.03e-12	1.47e-10	258	304.45	552.84	491.29	Promoter (<=1kb)	19	5740904	5754330	13427	1	16998	uc008gfe.1	0	ENSMUSG00000024940	Ltbp3	latent transforming growth factor beta binding protein 3	uc008gfe.1;uc008gff.1;uc008gfg.1;uc008gfc.2;uc008gfd.2;uc008gfh.1;uc008gfi.1;uc012bhd.1	16998;16998;16998;17826;56390;78891;78891;78891	0;0;0;-4651;-4651;0;0;0
chr6	127146912	127165147	18236	*	8.4	7.86	8.78	-0.92	4.2e-12	1.53e-10	241	224.33	464.21	417.75	Promoter (<=1kb)	6	127125708	127151048	25341	2	12444	uc009dvr.2	0	ENSMUSG00000000184	Ccnd2	cyclin D2	uc009dvr.2;uc009dvs.1;uc009dvt.2;uc009dvu.2;uc029vyr.1	12444;12444;77558;77558;77558	0;0;0;0;0
chr19	44647696	44697620	49925	*	9.62	9.25	9.92	-0.66	4.25e-12	1.54e-10	585	635.61	1015.93	916.87	Exon (uc057lax.1/uc057lax.1, exon 1 of 2)	19	44757394	44837871	80478	1	18504	uc008hqa.3	-59774	ENSMUSG00000004231	Pax2	paired box 2	NA	NA	NA
chr5	143358993	143376511	17519	*	8.31	7.77	8.71	-0.94	4.58e-12	1.66e-10	214	222.55	436.51	399.06	Promoter (<=1kb)	5	143363908	143391798	27891	1	170935	uc009ake.1	0	ENSMUSG00000010825	Grid2ip	glutamate receptor, ionotropic, delta 2 (Grid2) interacting protein 1	uc009akd.1;uc009ake.1;uc009akf.2	170935;170935;170935	0;0;0
chr2	131047894	131069316	21423	*	8.43	7.91	8.81	-0.9	4.83e-12	1.74e-10	242	237.69	469.74	426.79	Promoter (<=1kb)	2	131050822	131054361	3540	2	110751	uc008mkk.3	0	ENSMUSG00000027318	Adam33	a disintegrin and metallopeptidase domain 33	uc008mkk.3;uc008mkl.3;uc008mkm.3;uc008mkn.3;uc057lee.1;uc008mkf.2;uc008mkh.2;uc008mkj.1;uc008mko.1;uc008mkp.1	110751;110751;110751;110751;110751;14588;14588;14588;20612;20612	0;0;0;0;0;-4806;-4806;-4806;0;17449
chr2	130633189	130645636	12448	*	7.75	7.08	8.2	-1.12	5.58e-12	2.01e-10	141	129.97	303.56	285.13	Promoter (<=1kb)	2	130632765	130638095	5331	2	241638	uc008mjo.3	0	ENSMUSG00000037703	Lzts3	leucine zipper, putative tumor suppressor family member 3	uc008mji.3;uc008mjj.3;uc008mjk.3;uc008mjo.3;uc008mjq.3;uc012ceh.2;uc056zpn.1;uc008mjl.3;uc008mjm.3;uc008mjn.3	140629;140629;140629;241638;241638;241638;241638;380601;380601;380601	-3151;-3151;-3151;0;0;0;0;-3151;-3151;-3151
chr15	78711175	78722104	10930	*	7.5	6.76	7.99	-1.23	5.66e-12	2.04e-10	103	113.06	265.89	241.73	Promoter (<=1kb)	15	78670003	78718113	48111	2	207393	uc007wrf.2	0	ENSMUSG00000043460	Elfn2	leucine rich repeat and fibronectin type III, extracellular 2	uc007wrf.2;uc007wrg.2	207393;207393	0;0
chr5	31134544	31140179	5636	*	7.27	6.46	7.78	-1.32	5.94e-12	2.13e-10	86	89.91	226.01	214	Promoter (<=1kb)	5	31137989	31138895	907	2	22226	uc008wxe.1	0	ENSMUSG00000038676	Ucn	urocortin	uc056zzb.1;uc057btv.1;uc008wxf.3;uc056zzc.1;uc057btw.1;uc008wxe.1;uc008wxd.2	17527;17527;17527;17527;17527;22226;58522	14001;14001;14111;14111;14111;0;0
chr7	70323902	70345385	21484	*	8.42	7.89	8.8	-0.91	6.25e-12	2.23e-10	227	247.48	470.85	423.17	Promoter (<=1kb)	7	70178868	70337852	158985	2	624549	uc057ahu.1	0	ENSMUSG00000109097	Gm29683	predicted gene, 29683	uc057ahu.1;uc009hnh.2	624549;624549	0;0
chr7	144836288	144842787	6500	*	7.01	6.1	7.56	-1.45	6.44e-12	2.29e-10	70	67.66	192.22	185.06	Promoter (<=1kb)	7	144838612	144843348	4737	1	14174	uc009kqp.2	0	ENSMUSG00000031074	Fgf3	fibroblast growth factor 3	uc009kqp.2	14174	0
chr2	144326539	144336692	10154	*	7.78	7.1	8.24	-1.14	6.54e-12	2.32e-10	123	152.23	310.76	294.77	Promoter (<=1kb)	2	144305175	144331362	26188	2	107586	uc008mqv.2	0	ENSMUSG00000037279	Ovol2	ovo like zinc finger 2	uc008mqv.2;uc008mqw.2;uc008mqx.2	107586;107586;107586	0;0;0
chr2	170482840	170499077	16238	*	8.32	7.77	8.72	-0.95	6.63e-12	2.35e-10	207	229.67	447.03	396.65	Promoter (<=1kb)	2	170496428	170519070	22643	1	109054	uc008occ.2	0	ENSMUSG00000052033	Pfdn4	prefoldin 4	uc029uik.1;uc008occ.2;uc008ocb.2	100502946;109054;13081	12850;0;0
chr1	75412273	75429704	17432	*	8.01	7.41	8.43	-1.02	6.65e-12	2.35e-10	166	173.59	356.74	332.75	Exon (uc007boz.2/11790, exon 19 of 41)	1	75375297	75432314	57018	1	11790	uc007boz.2	36976	ENSMUSG00000026207	Speg	SPEG complex locus	uc007boz.2;uc007bpc.2	11790;11790	0;0
chr9	40867942	40898128	30187	*	9.3	8.91	9.6	-0.69	7.42e-12	2.62e-10	500	462.91	799.9	753.51	Promoter (<=1kb)	9	40874127	40877972	3846	1	244813	uc009paa.1	0	ENSMUSG00000054360	Bsx	brain specific homeobox	uc009paa.1;uc009pab.1;uc009pac.1	244813;70989;70989	0;0;0
chr12	111669028	111679055	10028	*	7.62	6.91	8.09	-1.18	7.7e-12	2.71e-10	127	113.06	288.05	256.8	Promoter (<=1kb)	12	111669355	111672338	2984	2	12709	uc007pdn.2	0	ENSMUSG00000001270	Ckb	creatine kinase, brain	uc007pdn.2;uc007pdo.1;uc007pdp.1;uc007pdq.1	12709;328162;328162;328162	0;0;0;0
chr8	71549463	71607969	58507	*	10.07	9.75	10.34	-0.59	8.24e-12	2.89e-10	799	922.26	1322.27	1265.29	Promoter (<=1kb)	8	71597646	71608149	10504	1	100037278	uc012gfv.1	0	ENSMUSG00000043243	Fam129c	family with sequence similarity 129, member C	uc012gfv.1;uc009med.2;uc012gfu.1;uc029wtt.1;uc009mee.2;uc009mdw.1;uc009mdx.1;uc009mdy.1;uc009mdz.1;uc009mea.1;uc012gft.1;uc009meb.1;uc057amb.1;uc009mec.1;uc009mds.1;uc009mdt.1	100037278;100037278;234404;234407;234407;26457;26457;26457;26457;26457;434325;66171;66171;66171;73711;73711	0;0;0;-3055;0;0;0;0;0;0;0;0;0;0;6533;6533
chr13	55465996	55495911	29916	*	8.79	8.32	9.14	-0.82	8.75e-12	3.06e-10	302	338.28	594.38	535.9	Promoter (<=1kb)	13	55477681	55477776	96	2	102465569	uc033gly.1	0	ENSMUSG00000098341	Mir6944	microRNA 6944	uc033gly.1;uc007qrb.2;uc007qrc.2;uc007qrd.2;uc011yzu.1;uc007qrf.3;uc007qrg.3;uc007qrh.3	102465569;432763;56320;56320;56320;67399;67399;67399	0;0;0;0;0;0;17535;17535
chr2	94228314	94251101	22788	*	8.76	8.3	9.12	-0.82	8.9e-12	3.1e-10	298	332.05	579.43	530.47	Promoter (<=1kb)	2	94241378	94241442	65	1	102465777	uc033hos.1	0	ENSMUSG00000106336	Mir129b	microRNA 129b	uc033hos.1;uc012bzz.1	102465777;723953	0;0
chr16	92690400	92703126	12727	*	8.09	7.49	8.51	-1.01	8.98e-12	3.12e-10	186	174.48	388.32	339.38	Promoter (<=1kb)	16	92601466	92697329	95864	2	12394	uc007zzi.3	0	ENSMUSG00000022952	Runx1	runt related transcription factor 1	uc007zzi.3;uc012ain.2;uc007zzj.3;uc007zzk.3;uc007zzl.1	12394;12394;12394;12394;12394	0;0;0;0;0
chr4	134237085	134254693	17609	*	8.21	7.64	8.61	-0.97	9.04e-12	3.14e-10	205	194.07	417.67	365.9	Promoter (<=1kb)	4	134228042	134238399	10358	2	194231	uc008vei.1	0	ENSMUSG00000028841	Cnksr1	connector enhancer of kinase suppressor of Ras 1	uc008vei.1;uc008vej.1;uc008vek.1;uc008veo.1;uc008vem.1;uc008ven.1;uc008vel.2;uc029uzv.1	194231;68040;68040;72690;77490;77490;77490;77490	0;0;0;0;0;0;0;0
chr15	85657468	85678840	21373	*	8.52	8.04	8.89	-0.84	9.32e-12	3.22e-10	262	265.28	476.95	468.98	Exon (uc007xdi.1/uc007xdi.1, exon 2 of 2)	15	85703773	85707524	3752	1	102800312	uc056yzv.1	-24933	NA	Lncppara	long noncoding RNA near Ppara	NA	NA	NA
chr8	83733235	83902435	169201	*	11.61	11.42	11.78	-0.36	9.64e-12	3.33e-10	2602	2860.24	3526.41	3492.66	Promoter (<=1kb)	8	83723251	83741311	18061	2	26364	uc009mlc.2	0	ENSMUSG00000002885	Adgre5	adhesion G protein-coupled receptor E5	uc009mlc.2;uc009mld.2;uc009mle.2;uc012ggt.1;uc009mlg.2;uc009mlh.2	26364;26364;26364;26364;330814;330814	0;0;0;0;0;0
chr5	36863680	36872131	8452	*	7.46	6.72	7.95	-1.24	9.7e-12	3.34e-10	114	96.14	255.37	239.31	Promoter (<=1kb)	5	36868570	36955078	86509	1	269643	uc008xfe.1	0	ENSMUSG00000029120	Ppp2r2c	protein phosphatase 2, regulatory subunit B, gamma	uc008xfe.1;uc029vhf.1	269643;71054	0;4748
chr2	26191787	26208007	16221	*	8.36	7.8	8.76	-0.95	1.02e-11	3.5e-10	228	218.99	471.41	394.24	Promoter (<=1kb)	2	26200212	26202866	2655	2	16871	uc008iug.1	0	ENSMUSG00000026934	Lhx3	LIM homeobox protein 3	uc008iug.1;uc008iuh.2;uc008iui.2;uc008iuk.2;uc008iuj.2;uc008iul.2	16871;16871;16871;227638;227638;227638	0;0;0;17364;29392;29392
chr1	190156510	190179953	23444	*	8.68	8.22	9.03	-0.81	1.21e-11	4.15e-10	296	300.89	538.99	505.15	Promoter (<=1kb)	1	190170296	190217276	46981	1	102632463	uc007ebd.1	0	ENSMUSG00000079045	LOC102632463	uncharacterized LOC102632463	uc007ebd.1;uc033fol.2;uc007ebc.2	102632463;19130;19130	0;0;0
chr9	89900223	89918956	18734	*	8.36	7.85	8.74	-0.89	1.22e-11	4.18e-10	225	235.91	442.05	414.73	Promoter (<=1kb)	9	89909775	89915847	6073	1	19417	uc009qzr.1	0	ENSMUSG00000032356	Rasgrf1	RAS protein-specific guanine nucleotide-releasing factor 1	uc009qzr.1;uc009qzs.1;uc009qzt.1	19417;19417;19417	0;0;0
chr2	118886688	118908972	22285	*	8.44	7.9	8.83	-0.93	1.25e-11	4.25e-10	231	246.59	493.01	415.33	Promoter (<=1kb)	2	118901615	118924524	22910	1	228536	uc008lsw.1	0	ENSMUSG00000040007	Bahd1	bromo adjacent homology domain containing 1	uc008lsw.1	228536	0
chr11	4941895	4955667	13773	*	7.98	7.37	8.4	-1.03	1.31e-11	4.44e-10	170	161.13	357.85	318.88	Promoter (<=1kb)	11	4947521	5042794	95274	1	11764	uc007hvn.2	0	ENSMUSG00000009090	Ap1b1	adaptor protein complex AP-1, beta 1 subunit	uc007hvn.2;uc007hvm.2	11764;380684	0;0
chr19	6827853	6849002	21150	*	8.46	7.96	8.82	-0.86	1.35e-11	4.57e-10	256	243.03	460.33	444.87	Promoter (<=1kb)	19	6829886	6829944	59	2	100628576	uc029tqw.1	0	ENSMUSG00000104884	Mir5046	microRNA 5046	uc029tqw.1;uc057lad.1;uc008gjb.1	100628576;56613;78317	0;0;0
chr1	136940805	136960305	19501	*	8.68	8.21	9.03	-0.83	1.38e-11	4.67e-10	302	288.43	555.61	493.1	Promoter (<=1kb)	1	136843584	136949562	105979	2	26424	uc007cva.2	0	ENSMUSG00000026398	Nr5a2	nuclear receptor subfamily 5, group A, member 2	uc007cva.2;uc007cvb.2;uc007cvc.2	26424;26424;26424	0;0;0
chr2	165099813	165136842	37030	*	9.01	8.54	9.36	-0.81	1.39e-11	4.68e-10	349	397.03	710.16	600.4	3' UTR	2	165111507	165181459	69953	2	104010	uc012cjh.1	44617	ENSMUSG00000053166	Cdh22	cadherin 22	uc012cjh.1;uc008nxc.2	104010;104010	0;0
chr15	37227229	37242147	14919	*	8.3	7.76	8.69	-0.93	1.41e-11	4.74e-10	219	215.43	437.06	388.81	Promoter (<=1kb)	15	37233036	37363569	130534	1	252973	uc007vne.3	0	ENSMUSG00000022286	Grhl2	grainyhead like transcription factor 2	uc007vne.3	252973	0
chr1	167678103	167698706	20604	*	8.7	8.23	9.05	-0.81	1.41e-11	4.74e-10	315	287.54	547.85	509.37	Promoter (<=1kb)	1	167689558	167848733	159176	1	110648	uc007dlc.1	0	ENSMUSG00000026686	Lmx1a	LIM homeobox transcription factor 1 alpha	uc007dlc.1	110648	0
chr15	102741307	102771683	30377	*	9.02	8.61	9.33	-0.72	1.43e-11	4.8e-10	384	398.81	647.01	642.59	Promoter (<=1kb)	15	102746441	102746909	469	2	102216269	uc033gxb.1	0	NA	Gm38436	predicted gene, 38436	uc033gxb.1	102216269	0
chr11	101923713	101971483	47771	*	9.46	9.1	9.75	-0.66	1.45e-11	4.82e-10	515	579.53	871.35	855.38	Promoter (<=1kb)	11	101952421	101960574	8154	1	73887	uc007lpy.2	0	ENSMUSG00000071818	4930417O22Rik	RIKEN cDNA 4930417O22 gene	uc007lqa.3;uc007lpy.2;uc011yfn.1	72349;73887;74499	0;0;0
chr7	70278213	70291246	13034	*	8.21	7.66	8.62	-0.96	1.47e-11	4.88e-10	220	183.38	401.06	383.39	Exon (uc009hnh.2/624549, exon 2 of 4)	7	70178868	70337852	158985	2	624549	uc057ahu.1	46606	ENSMUSG00000109097	Gm29683	predicted gene, 29683	uc057ahu.1;uc009hnh.2	624549;624549	0;0
chr1	87252741	87270501	17761	*	8.31	7.77	8.7	-0.93	1.54e-11	5.11e-10	220	215.43	442.6	387.6	Promoter (<=1kb)	1	87264364	87310791	46428	1	98363	uc007bwo.1	0	ENSMUSG00000026255	Efhd1	EF hand domain containing 1	uc007bwo.1	98363	0
chr17	36076534	36148349	71816	*	10.67	10.43	10.88	-0.45	1.6e-11	5.3e-10	1392	1371.81	1943.24	1830.72	Promoter (<=1kb)	17	36080189	36084249	4061	2	14963	uc008ckb.2	0	ENSMUSG00000073406	H2-Bl	histocompatibility 2, blastocyst	uc008ckb.2;uc008ckc.2;uc008ckd.2;uc012asc.1;uc012asd.1;uc012ase.1;uc012asf.1;uc012asg.1;uc012asi.2;uc057kxu.1;uc029thl.2;uc008cjx.3;uc012asl.1;uc033hdp.1;uc012asm.1	14963;14963;14963;14963;14963;14963;14963;14963;15024;15024;15040;15051;630294;667803;675325	0;0;0;0;0;0;0;0;0;0;0;0;0;0;0
chr14	70875034	70904540	29507	*	8.97	8.56	9.29	-0.73	1.61e-11	5.31e-10	371	383.68	625.96	623.9	Promoter (<=1kb)	14	70890107	70979840	89734	1	14586	uc007uoz.2	0	ENSMUSG00000022103	Gfra2	glial cell line derived neurotrophic factor family receptor alpha 2	uc007uoz.2;uc007upa.2;uc007upb.2;uc029sls.1	14586;14586;14586;73648	0;0;0;22101
chr13	120020483	120027814	7332	*	8.42	7.91	8.8	-0.89	1.77e-11	5.84e-10	254	227	466.98	424.38	Distal Intergenic	13	120034605	120052204	17600	2	100861753	uc029sds.2	24390	ENSMUSG00000095609	Gm21188	predicted gene, 21188	NA	NA	NA
chr17	56115461	56129392	13932	*	7.96	7.33	8.4	-1.07	1.97e-11	6.48e-10	150	172.7	366.16	310.45	Promoter (<=1kb)	17	56111601	56117298	5698	2	66968	uc008daz.1	0	ENSMUSG00000011305	Plin5	perilipin 5	uc008dbd.2;uc008dbe.1;uc008daz.1;uc008dba.1;uc008dbb.1	20359;20359;66968;66968;76905	0;0;0;0;0
chr9	119565973	119590044	24072	*	8.56	8.08	8.92	-0.84	2.06e-11	6.74e-10	278	261.72	505.2	461.15	Promoter (<=1kb)	9	119483408	119579016	95609	2	20271	uc009sbc.2	0	ENSMUSG00000032511	Scn5a	sodium channel, voltage-gated, type V, alpha	uc009sbe.2;uc009sbc.2	20271;20271	-3295;0
chr9	122557899	122583250	25352	*	8.9	8.48	9.23	-0.75	2.18e-11	7.12e-10	349	363.21	619.86	578.09	Promoter (<=1kb)	9	122572501	122580647	8147	1	319626	uc009sfa.2	0	ENSMUSG00000097736	9530059O14Rik	RIKEN cDNA 9530059O14 gene	uc009sfa.2;uc009sfb.2;uc012hcw.1	319626;319626;319626	0;0;0
chr19	5555601	5568789	13189	*	7.86	7.23	8.29	-1.06	2.4e-11	7.82e-10	154	145.99	332.92	293.57	Promoter (<=1kb)	19	5549137	5560575	11439	2	18426	uc008gdu.1	0	ENSMUSG00000024922	Ovol1	ovo like zinc finger 1	uc008gdu.1;uc008gdv.1;uc008gdw.1	18426;381201;381201	0;0;0
chr11	75190940	75201549	10610	*	7.66	7	8.12	-1.12	2.45e-11	7.95e-10	120	135.31	284.73	270.66	Promoter (<=1kb)	11	75193993	75267762	73770	1	237847	uc007kdh.1	0	ENSMUSG00000045287	Rtn4rl1	reticulon 4 receptor-like 1	uc007kdh.1;uc007kdg.1	237847;246257	0;-457
chr5	120269185	120306418	37234	*	9.18	8.78	9.49	-0.71	2.45e-11	7.95e-10	422	457.57	749.49	687.2	Distal Intergenic	5	120431886	120441457	9572	1	16873	uc012ecn.1	-125468	ENSMUSG00000029595	Lhx5	LIM homeobox protein 5	NA	NA	NA
chr11	4743305	4750417	7113	*	7.24	6.38	7.78	-1.39	2.48e-11	8.02e-10	79	88.13	248.17	190.49	Promoter (<=1kb)	11	4738821	4746778	7958	2	192650	uc007hve.1	0	ENSMUSG00000009075	Cabp7	calcium binding protein 7	uc007hve.1	192650	0
chr6	53793303	53826538	33236	*	9.19	8.79	9.51	-0.71	2.5e-11	8.07e-10	430	457.57	768.32	686.6	Promoter (<=1kb)	6	53815468	53820825	5358	2	66873	uc009bzk.2	0	ENSMUSG00000043496	Tril	TLR4 interactor with leucine-rich repeats	uc009bzk.2	66873	0
chr1	187604170	187613432	9263	*	7.79	7.11	8.25	-1.14	2.52e-11	8.1e-10	122	154.01	325.72	282.11	Promoter (<=1kb)	1	187609006	188214884	605879	1	26381	uc007eaa.2	0	ENSMUSG00000026610	Esrrg	estrogen-related receptor gamma	uc007eaa.2	26381	0
chr15	76085918	76104084	18167	*	8.27	7.74	8.65	-0.91	2.52e-11	8.1e-10	212	216.32	416.01	387.6	Promoter (<=1kb)	15	76085594	76090013	4420	2	223649	uc007wil.1	0	ENSMUSG00000075590	Nrbp2	nuclear receptor binding protein 2	uc007wil.1;uc007wim.1;uc007win.1;uc057kue.1;uc007wij.2;uc007wik.2	223649;223649;223649;223650;67959;67959	0;0;0;0;-4972;-4972
chr5	41753357	41777659	24303	*	8.89	8.43	9.24	-0.81	2.6e-11	8.34e-10	383	307.12	627.07	583.52	Promoter (<=1kb)	5	41761448	41764220	2773	2	12020	uc008xhc.1	0	ENSMUSG00000049691	Nkx3-2	NK3 homeobox 2	uc008xhc.1	12020	0
chr19	25660280	25681119	20840	*	8.67	8.21	9.02	-0.81	2.61e-11	8.34e-10	296	295.55	548.41	490.68	Promoter (<=1kb)	19	25671134	25672239	1106	2	100503074	uc008hbl.2	0	ENSMUSG00000101089	2610016A17Rik	RIKEN cDNA 2610016A17 gene	uc008hbl.2;uc008hbm.1	100503074;226049	0;0
chr2	165229198	165244410	15213	*	8.08	7.5	8.49	-0.99	2.69e-11	8.57e-10	176	185.16	383.33	335.16	Promoter (<=1kb)	2	165111507	165234737	123231	2	104010	uc008nxc.2	0	ENSMUSG00000053166	Cdh22	cadherin 22	uc008nxc.2	104010	0
chr1	74947542	74959520	11979	*	8.02	7.43	8.44	-1	2.73e-11	8.66e-10	171	174.48	368.93	324.31	Promoter (<=1kb)	1	74945315	74951672	6358	2	16147	uc007bnl.3	0	ENSMUSG00000006538	Ihh	Indian hedgehog	uc007bnl.3;uc007bnm.2	16147;16147	0;0
chr7	25004889	25012406	7518	*	7.29	6.52	7.79	-1.27	2.77e-11	8.78e-10	100	83.68	222.13	221.83	Promoter (<=1kb)	7	24978167	25005937	27771	2	232975	uc009frf.3	0	ENSMUSG00000040907	Atp1a3	ATPase, Na+/K+ transporting, alpha 3 polypeptide	uc009frh.3;uc009fri.3;uc009frf.3;uc009fre.3;uc009frg.2	14809;14809;232975;232975;232975	0;0;0;0;0
chr14	70551608	70558114	6507	*	7	6.1	7.55	-1.44	3.04e-11	9.62e-10	70	67.66	203.3	171.2	Promoter (<=1kb)	14	70554056	70573548	19493	1	15460	uc007uoj.2	0	ENSMUSG00000022096	Hr	lysine demethylase and nuclear receptor corepressor	uc007uoj.2;uc007uoi.2	15460;72549	0;6357
chr13	54736448	54759655	23208	*	8.46	7.98	8.82	-0.84	3.05e-11	9.63e-10	248	255.49	443.16	459.94	Promoter (<=1kb)	13	54736671	54749874	13204	2	26913	uc007qpa.2	0	ENSMUSG00000069227	Gprin1	G protein-regulated inducer of neurite outgrowth 1	uc007qpc.1;uc007qoz.2;uc007qpa.2;uc007qpb.2	104069;268663;26913;26913	0;0;0;0
chr5	73000346	73017325	16980	*	8.32	7.81	8.7	-0.89	3.14e-11	9.9e-10	235	212.76	424.88	405.09	Promoter (<=1kb)	5	73006904	73012955	6052	1	231290	uc008xsk.1	0	ENSMUSG00000029219	Slc10a4	solute carrier family 10 (sodium/bile acid cotransporter family), member 4	uc008xsk.1;uc008xsl.1;uc008xsm.1;uc008xsn.1	231290;72313;72313;72313	0;29676;54253;239293
chr9	107663703	107685198	21496	*	8.54	8.05	8.91	-0.86	3.25e-11	1.02e-09	249	280.42	509.63	452.71	Promoter (<=1kb)	9	107674474	107679592	5119	2	14685	uc009rmr.1	0	ENSMUSG00000034837	Gnat1	guanine nucleotide binding protein, alpha transducing 1	uc009rmr.1;uc009rms.1;uc009rmt.1;uc009rmu.1;uc009rmn.1;uc009rmo.2;uc009rmp.1;uc009rmq.2	14685;20350;20350;20350;76257;76257;76257;76257	0;0;0;0;-4175;0;0;0
chr12	117148494	117170157	21664	*	8.72	8.25	9.07	-0.82	3.36e-11	1.05e-09	301	307.12	581.09	496.11	Promoter (<=1kb)	12	117144523	117151269	6747	2	100038689	uc007phz.2	0	ENSMUSG00000099907	Gm10421	predicted gene 10421	uc007phz.2;uc007phx.2;uc011yvq.1	100038689;19276;19276	0;0;0
chr15	80011068	80024067	13000	*	7.88	7.23	8.32	-1.09	3.39e-11	1.06e-09	141	160.24	347.32	291.76	Promoter (<=1kb)	15	79995874	80014808	18935	2	18591	uc007wuz.2	0	ENSMUSG00000000489	Pdgfb	platelet derived growth factor, B polypeptide	uc007wuz.2;uc007wva.1	18591;18591	0;0
chr8	105348524	105529506	180983	*	11.78	11.62	11.92	-0.31	3.86e-11	1.2e-09	3137	3140.66	3972.89	3795.87	Promoter (<=1kb)	8	105374904	105382862	7959	1	102075	uc009ncv.1	0	ENSMUSG00000014782	Plekhg4	pleckstrin homology domain containing, family G (with RhoGef domain) member 4	uc009ncv.1;uc009ncw.1;uc009ncx.1;uc009ndg.1;uc009nde.1;uc009ndf.1;uc009nct.2;uc012gjj.1;uc009nda.2;uc012gjk.1;uc009ndb.2;uc009ncu.1;uc009ncy.2;uc009ncz.2;uc009ndc.2;uc012gjl.1;uc009ndd.1	102075;102075;102075;11972;15484;15484;234686;270091;270091;270091;270091;277973;279499;279499;67971;70796;70796	0;0;0;0;0;0;-554;0;0;0;0;0;0;0;0;0;0
chr5	138989013	139002713	13701	*	8.09	7.53	8.49	-0.97	3.87e-11	1.2e-09	178	190.5	376.68	343	Promoter (<=1kb)	5	138976971	138994953	17983	2	18590	uc009afw.3	0	ENSMUSG00000025856	Pdgfa	platelet derived growth factor, alpha	uc009afw.3;uc009afx.3	18590;18590	0;0
chr11	77451925	77489322	37398	*	9.23	8.85	9.52	-0.67	3.88e-11	1.2e-09	464	461.13	755.03	714.93	Promoter (<=1kb)	11	77462384	77468370	5987	1	216961	uc007kgq.1	0	ENSMUSG00000020836	Coro6	coronin 6	uc007kgq.1;uc011xzu.1;uc011xzv.1;uc007kgr.1;uc007kgs.1;uc007kgt.1;uc007kgy.1;uc007kgl.3;uc007kgo.3;uc007kgu.1;uc007kgv.1;uc007kgw.1;uc007kgx.1;uc011xzw.1	216961;216961;216961;216961;216961;216961;216963;237860;237860;268445;268445;268445;268445;268445	0;0;0;0;0;0;-4090;0;0;0;0;0;0;0
chr7	101811343	101821489	10147	*	7.78	7.15	8.22	-1.07	3.96e-11	1.22e-09	139	145.1	316.86	280.91	Promoter (<=1kb)	7	101818313	101822726	4414	1	11859	uc009ipe.2	0	ENSMUSG00000007946	Phox2a	paired-like homeobox 2a	uc009ipe.2;uc009ipf.2;uc009ipg.2;uc009iph.2;uc009ipi.1	11859;16332;16332;16332;16332	0;7803;16335;16737;16295
chr3	154317635	154345961	28327	*	9.1	8.71	9.4	-0.7	4.04e-11	1.25e-09	434	401.48	689.66	664.29	Promoter (<=1kb)	3	154306293	154330560	24268	2	16875	uc008rum.2	0	ENSMUSG00000096225	Lhx8	LIM homeobox protein 8	uc008rum.2;uc008run.1	16875;99686	0;0
chr5	114269870	114279035	9166	*	7.45	6.71	7.93	-1.22	4.12e-11	1.27e-09	97	113.06	259.8	229.07	Promoter (<=1kb)	5	114254164	114273761	19598	2	116810	uc008yzk.1	0	ENSMUSG00000042002	Foxn4	forkhead box N4	uc008yzk.1	116810	0
chr2	31839539	31847616	8078	*	7.22	6.43	7.73	-1.3	4.18e-11	1.28e-09	84	88.13	226.01	198.93	Promoter (<=1kb)	2	31813290	31846005	32716	2	98970	uc008jee.2	0	ENSMUSG00000026841	Fibcd1	fibrinogen C domain containing 1	uc008jee.2	98970	0
chr8	92197055	92440965	243911	*	12.21	12.07	12.33	-0.26	4.22e-11	1.29e-09	4226	4376.27	5184.37	5134.71	Promoter (<=1kb)	8	92357796	92361456	3661	1	54352	uc009mub.1	0	ENSMUSG00000031737	Irx5	Iroquois homeobox 5	uc009mub.1;uc009mua.3;uc033jgt.1	54352;71296;71296	0;0;0
chr7	44350127	44356031	5905	*	6.81	5.81	7.39	-1.58	4.22e-11	1.29e-09	57	55.19	189.45	147.08	Promoter (<=1kb)	7	44350898	44354644	3747	1	243961	uc009gpd.2	0	ENSMUSG00000038738	Shank1	SH3 and multiple ankyrin repeat domains 1	uc012fjo.1;uc009gpc.2;uc009gpd.2;uc009gpe.2;uc009gpf.3	243961;243961;243961;243961;69349	0;0;0;0;18999
chr4	123095515	123118099	22585	*	8.5	8.03	8.86	-0.83	4.26e-11	1.3e-09	256	267.95	472.51	455.72	Promoter (<=1kb)	4	123105161	123126094	20934	1	12164	uc008uot.2	0	ENSMUSG00000002384	Bmp8b	bone morphogenetic protein 8b	uc008uot.2;uc008uov.1;uc008uou.2	12164;12164;353371	0;-1595;0
chr1	75351759	75390409	38651	*	9.17	8.76	9.49	-0.72	4.58e-11	1.39e-09	415	454.9	765.55	672.13	Promoter (<=1kb)	1	75368210	75375015	6806	2	100503248	uc007boy.2	0	ENSMUSG00000085653	Gm15179	predicted gene 15179	uc007boy.2;uc007boz.2;uc007bpa.1;uc007bpb.1;uc007bpc.2;uc007box.2	100503248;11790;11790;11790;11790;13346	0;0;0;0;0;0
chr12	86414960	86435719	20760	*	8.51	8.01	8.88	-0.87	4.66e-11	1.41e-09	257	258.16	508.52	432.82	Promoter (<=1kb)	12	86421644	86515522	93879	1	26380	uc007ohu.1	0	ENSMUSG00000021255	Esrrb	estrogen related receptor, beta	uc007oht.2;uc007ohu.1;uc007ohv.2	26380;26380;26380	0;0;0
chr11	116278892	116284903	6012	*	7.43	6.69	7.91	-1.22	4.7e-11	1.42e-09	105	101.48	260.35	221.23	Promoter (<=1kb)	11	116280939	116283938	3000	1	14428	uc007mkr.2	0	ENSMUSG00000020793	Galr2	galanin receptor 2	uc007mkr.2;uc007mkq.1;uc007mks.2;uc007mkt.2;uc007mku.2;uc057kmy.1	14428;217337;53413;53413;53413;53413	0;-4675;13275;21835;21835;21835
chr6	29522103	29532915	10813	*	7.68	7.02	8.13	-1.11	5.09e-11	1.54e-09	118	141.54	283.62	276.09	Promoter (<=1kb)	6	29526625	29537320	10696	1	27056	uc009bdu.2	0	ENSMUSG00000029771	Irf5	interferon regulatory factor 5	uc009bdu.2;uc009bdv.2;uc009bdw.2	27056;27056;27056	0;0;0
chr11	76992357	77022590	30234	*	8.93	8.5	9.26	-0.76	5.12e-11	1.54e-09	342	382.79	645.35	581.71	Promoter (<=1kb)	11	76998597	77032343	33747	1	15567	uc007kgf.2	0	ENSMUSG00000020838	Slc6a4	solute carrier family 6 (neurotransmitter transporter, serotonin), member 4	uc007kge.2;uc007kgf.2	104184;15567	46701;0
chr11	82928396	82938319	9924	*	7.57	6.88	8.03	-1.15	5.13e-11	1.54e-09	122	113.06	279.74	243.53	3' UTR	11	82911253	82929745	18493	1	217012	uc007knu.2	17143	ENSMUSG00000018845	Unc45b	unc-45 myosin chaperone B	uc007knu.2;uc007knv.2;uc007knw.1;uc007knx.2	217012;217012;217012;76392	0;0;0;0
chr1	171059151	171076438	17288	*	8.01	7.44	8.42	-0.98	5.31e-11	1.59e-09	163	185.16	344.55	341.19	Promoter (<=1kb)	1	171064591	171064652	62	2	102466998	uc033fnc.1	0	ENSMUSG00000099119	Mir6546	microRNA 6546	uc033fnc.1;uc007dmy.2;uc007dmz.2;uc011wvw.1	102466998;14131;14131;14131	0;-1099;0;0
chr15	97999473	98013584	14112	*	8.09	7.51	8.5	-0.98	5.34e-11	1.6e-09	177	188.72	389.42	333.95	Promoter (<=1kb)	15	97975602	98004724	29123	2	12824	uc007xlp.2	0	ENSMUSG00000022483	Col2a1	collagen, type II, alpha 1	uc007xlp.2;uc007xlq.2	12824;12824	0;0
chr18	38207913	38223313	15401	*	7.98	7.39	8.4	-1.01	6.03e-11	1.8e-09	153	182.49	346.22	327.32	Promoter (<=1kb)	18	38196694	38209762	13069	2	75599	uc008eru.1	0	ENSMUSG00000051375	Pcdh1	protocadherin 1	uc008eru.1	75599	0
chr6	124993796	125000470	6675	*	7.21	6.39	7.73	-1.34	6.04e-11	1.8e-09	78	89.91	233.21	191.69	Promoter (<=1kb)	6	124996720	125003096	6377	1	319352	uc009dst.4	0	ENSMUSG00000030329	Pianp	PILR alpha associated neural protein	uc009dst.4;uc009dsu.4;uc009dsv.4	319352;319352;319352	0;0;0
chr12	9570317	9584649	14333	*	8.23	7.63	8.65	-1.01	6.16e-11	1.83e-09	199	198.52	454.23	348.42	Promoter (<=1kb)	12	9574442	9581500	7059	1	23967	uc007nao.2	0	ENSMUSG00000048387	Osr1	odd-skipped related transcription factor 1	uc007nao.2;uc007nan.1	23967;69420	0;0
chr17	56509654	56538060	28407	*	8.89	8.47	9.21	-0.74	6.32e-11	1.88e-09	343	365.88	618.2	568.45	Promoter (<=1kb)	17	56511248	56512483	1236	2	20834	uc008dce.1	0	ENSMUSG00000044526	Znrf4	zinc and ring finger 4	uc008dce.1	20834	0
chr11	103792554	103817575	25022	*	8.81	8.38	9.14	-0.76	6.37e-11	1.88e-09	327	340.95	588.29	540.11	3' UTR	11	103774175	103818021	43847	1	22415	uc007lvs.2	18379	ENSMUSG00000000125	Wnt3	wingless-type MMTV integration site family, member 3	uc007lvt.2;uc007lvs.2	18195;22415	136481;0
chr12	72930629	72962842	32214	*	9.35	8.99	9.63	-0.64	6.38e-11	1.88e-09	527	492.29	809.31	779.43	Promoter (<=1kb)	12	72939882	72944899	5018	1	20476	uc007nvy.2	0	ENSMUSG00000021099	Six6	sine oculis-related homeobox 6	uc007nvy.2;uc057kol.1;uc007nvx.1	20476;75801;75801	0;0;0
chr5	76854801	76862574	7774	*	7.54	6.86	7.99	-1.13	6.43e-11	1.9e-09	122	110.39	251.49	258.6	Promoter (<=1kb)	5	76857530	76873554	16025	1	320827	uc008xvh.2	0	ENSMUSG00000036377	C530008M17Rik	RIKEN cDNA C530008M17 gene	uc008xvf.2;uc008xvh.2	320827;320827	0;0
chr12	80511729	80523292	11564	*	7.76	7.13	8.19	-1.06	6.58e-11	1.93e-09	135	145.99	300.79	283.32	Promoter (<=1kb)	12	80518471	80603896	85426	1	108760	uc007oaw.1	0	ENSMUSG00000021130	Galnt16	polypeptide N-acetylgalactosaminyltransferase 16	uc007oaw.1;uc007oax.1;uc007oay.1;uc029rty.1	108760;108760;108760;69522	0;0;0;0
chr4	136079721	136098998	19278	*	8.1	7.55	8.49	-0.94	7.9e-11	2.32e-09	182	192.29	376.68	343.6	Distal Intergenic	4	136049948	136053371	3424	2	67025	uc057lkl.1	-26350	ENSMUSG00000059291	Rpl11	ribosomal protein L11	NA	NA	NA
chr17	8428290	8450211	21922	*	8.68	8.24	9.02	-0.78	8.03e-11	2.35e-09	291	313.35	530.68	504.55	Promoter (<=1kb)	17	8434423	8442496	8074	1	20997	uc008ajq.1	0	ENSMUSG00000062327	T	brachyury, T-box transcription factor T	uc008ajq.1	20997	0
chr10	81331160	81348489	17330	*	8.28	7.75	8.67	-0.93	8.09e-11	2.36e-09	203	227	439.83	377.36	Promoter (<=1kb)	10	81337762	81343266	5505	2	209047	uc007ghi.1	0	ENSMUSG00000034872	Gipc3	GIPC PDZ domain containing family, member 3	uc007ghj.2;uc007ghl.2;uc007ghk.2;uc007ghm.2;uc007ghn.2;uc007ghi.1;uc007ghg.2;uc007ghh.2;uc007ghf.2	15353;15353;15353;15353;15353;209047;21390;21390;70312	0;0;0;0;0;0;0;0;10057
chr7	13041723	13046072	4350	*	6.77	5.81	7.34	-1.53	8.18e-11	2.38e-09	62	49.85	169.51	154.32	5' UTR	7	13042303	13053684	11382	2	109889	uc009ffe.2	7612	ENSMUSG00000030380	Mzf1	myeloid zinc finger 1	uc009ffe.2;uc009fff.2;uc012ezg.2;uc012ezh.1;uc009ffg.2;uc029wdr.1;uc009ffd.2;uc012ezf.2	109889;109889;109889;109889;109889;22192;22192;22192	0;0;0;0;8692;-4096;-3745;-3448
chr7	16471092	16482325	11234	*	7.79	7.17	8.21	-1.04	8.28e-11	2.41e-09	151	137.98	305.22	288.14	Promoter (<=1kb)	7	16455721	16476780	21060	2	18142	uc009fhv.2	0	ENSMUSG00000001988	Npas1	neuronal PAS domain protein 1	uc009fhv.2	18142	0
chr3	104775717	104787921	12205	*	8.02	7.46	8.41	-0.95	8.76e-11	2.54e-09	173	179.82	344	338.17	Promoter (<=1kb)	3	104767405	104777547	10143	2	329731	uc008quj.2	0	ENSMUSG00000055865	Fam19a3	family with sequence similarity 19, member A3	uc008qul.2;uc056ztz.1;uc008quj.2;uc008quk.2	11853;11853;329731;71887	-1113;-1113;0;0
chr7	78575834	78590336	14503	*	7.96	7.39	8.36	-0.97	8.82e-11	2.55e-09	172	163.8	336.8	321.9	Promoter (<=1kb)	7	78192114	78577838	385725	2	18213	uc009hxf.2	0	ENSMUSG00000059146	Ntrk3	neurotrophic tyrosine kinase, receptor, type 3	uc009hxf.2;uc029wmd.1;uc009hxh.3;uc009hxi.2;uc012fnd.1;uc009hxj.1	18213;18213;18213;18213;414121;414121	0;0;0;0;0;0
chr12	56607460	56621022	13563	*	8.12	7.59	8.51	-0.92	8.89e-11	2.57e-09	194	190.5	377.24	352.04	Promoter (<=1kb)	12	56611393	56613284	1892	2	18094	uc007nph.2	0	ENSMUSG00000058669	Nkx2-9	NK2 homeobox 9	uc007nph.2	18094	0
chr2	148021135	148078028	56894	*	9.94	9.64	10.18	-0.55	8.94e-11	2.58e-09	789	802.08	1211.48	1114.59	Promoter (<=1kb)	2	148042877	148045464	2588	2	15376	uc056zpw.1	0	ENSMUSG00000037025	Foxa2	forkhead box A2	uc056zpw.1;uc008mta.2;uc008mtb.2	15376;15376;15376	0;0;0
chr1	184715728	184740436	24709	*	9.16	8.49	9.61	-1.12	1.02e-10	2.93e-09	332	387.24	854.18	712.52	Promoter (<=1kb)	1	184727143	184732493	5351	2	15284	uc007dyn.3	0	ENSMUSG00000039377	Hlx	H2.0-like homeobox	uc007dyn.3;uc029qvc.1	15284;74971	0;0
chr9	21976504	21994561	18058	*	8.21	7.67	8.6	-0.93	1.05e-10	3.01e-09	189	218.99	410.47	367.11	Promoter (<=1kb)	9	21971004	21989453	18450	2	71746	uc009onf.1	0	ENSMUSG00000040146	Rgl3	ral guanine nucleotide dissociation stimulator-like 3	uc009onf.1;uc009ong.2;uc012gpk.1;uc009onh.1	71746;77609;77609;77609	0;0;0;8073
chr11	102144525	102150199	5675	*	7.15	6.31	7.68	-1.36	1.06e-10	3.04e-09	88	71.22	226.56	183.25	Promoter (<=1kb)	11	102145513	102149528	4016	1	217214	uc007lqp.2	0	ENSMUSG00000048217	Nags	N-acetylglutamate synthase	uc007lqp.2;uc007lqq.2;uc007lqr.2	217214;217214;76547	0;0;6208
chr2	29247665	29256898	9234	*	7.52	6.79	8	-1.21	1.16e-10	3.32e-09	116	105.93	286.39	225.45	Promoter (<=1kb)	2	29194726	29248099	53374	2	171171	uc008izo.2	0	ENSMUSG00000035513	Ntng2	netrin G2	uc008izo.2;uc008izp.2;uc012btf.2;uc008izq.1	171171;171171;171171;76220	0;0;0;0
chr17	23631039	23662132	31094	*	8.83	8.42	9.15	-0.73	1.17e-10	3.32e-09	350	335.61	579.43	555.79	Promoter (<=1kb)	17	23660523	23668621	8099	1	212733	uc008asr.2	0	ENSMUSG00000043782	Bicdl2	BICD family like cargo adaptor 2	uc008asr.2;uc008asq.3;uc012alw.3	212733;240047;240047	0;0;0
chr6	70943274	70964306	21033	*	8.57	8.12	8.92	-0.8	1.17e-10	3.32e-09	286	269.73	505.2	462.96	Promoter (<=1kb)	6	70956606	70961066	4461	1	232077	uc012ene.1	0	ENSMUSG00000055874	Foxi3	forkhead box I3	uc012ene.1	232077	0
chr4	140242599	140252205	9607	*	7.63	6.99	8.07	-1.08	1.21e-10	3.43e-09	123	130.86	271.43	265.23	Promoter (<=1kb)	4	140026852	140246811	219960	2	230868	uc008vmu.2	0	ENSMUSG00000040972	Igsf21	immunoglobulin superfamily, member 21	uc008vmu.2	230868	0
chr10	52013233	52041723	28491	*	9.23	8.87	9.52	-0.65	1.25e-10	3.54e-09	485	449.56	743.95	723.97	Promoter (<=1kb)	10	52022502	52028471	5970	1	215031	uc007faz.2	0	ENSMUSG00000049641	Vgll2	vestigial like family member 2	uc007fbb.1;uc007faz.2;uc007fba.2	19886;215031;215031	153521;0;0
chr8	121044522	121095373	50852	*	10.29	9.74	10.68	-0.94	1.29e-10	3.64e-09	841	875.08	1797	1484.11	Promoter (<=1kb)	8	121084386	121088154	3769	1	15227	uc009nrn.2	0	ENSMUSG00000042812	Foxf1	forkhead box F1	uc009nrn.2;uc009nro.1;uc009nrp.2;uc029wwp.1;uc009nrl.2;uc033jif.2;uc009nrm.2	15227;234814;234814;234814;68790;68790;68790	0;0;0;0;0;0;0
chr2	38703371	38714131	10761	*	7.88	7.23	8.32	-1.09	1.33e-10	3.75e-09	139	161.13	356.74	282.72	Promoter (<=1kb)	2	38692656	38712234	19579	2	26423	uc008jnr.2	0	ENSMUSG00000026751	Nr5a1	nuclear receptor subfamily 5, group A, member 1	uc008jnr.2;uc008jns.2;uc008jnt.1	26423;26423;26423	0;0;0
chr5	139577236	139605434	28199	*	8.82	8.41	9.14	-0.73	1.34e-10	3.76e-09	330	350.74	558.38	569.65	Distal Intergenic	5	139543898	139548179	4282	1	22255	uc009agv.2	33338	ENSMUSG00000029546	Uncx	UNC homeobox	NA	NA	NA
chr13	116288424	116323240	34817	*	9.47	9.11	9.76	-0.65	1.34e-10	3.76e-09	599	507.42	890.74	845.13	Promoter (<=1kb)	13	116298270	116309688	11419	2	16392	uc007rye.2	0	ENSMUSG00000042258	Isl1	ISL1 transcription factor, LIM/homeodomain	uc007rye.2;uc007ryf.2;uc007ryg.2	16392;16392;16392	0;0;0
chr7	100004021	100009742	5722	*	7.01	6.17	7.53	-1.37	1.36e-10	3.8e-09	78	65.88	191.66	179.03	Promoter (<=1kb)	7	100006404	100034726	28323	1	69121	uc009imi.2	0	ENSMUSG00000030732	Chrdl2	chordin-like 2	uc009imi.2;uc057ain.1	69121;69121	0;-176
chr7	142963305	142978373	15069	*	8.27	7.76	8.64	-0.88	1.45e-10	4.05e-09	230	204.75	407.7	390.02	Promoter (<=1kb)	7	142966822	142969264	2443	2	17173	uc009koj.2	0	ENSMUSG00000009248	Ascl2	achaete-scute family bHLH transcription factor 2	uc009koj.2	17173	0
chr2	172726941	172741068	14128	*	8	7.45	8.4	-0.95	1.51e-10	4.22e-09	168	181.6	334.03	340.59	Distal Intergenic	2	172550991	172558622	7632	1	21420	uc008oda.3	175950	ENSMUSG00000028640	Tfap2c	transcription factor AP-2, gamma	NA	NA	NA
chr17	35189864	35214081	24218	*	8.74	8.31	9.07	-0.75	1.62e-10	4.5e-09	314	322.26	557.27	514.19	Promoter (<=1kb)	17	35194972	35195049	78	1	102465588	uc033hdg.1	0	ENSMUSG00000098291	Mir6973a	microRNA 6973a	uc033hdg.1;uc033hdh.1;uc008cgn.1;uc008cgo.2;uc008cgu.2;uc008cgp.2;uc008cgq.2;uc008cgr.2;uc012arb.2	102465588;102466990;16988;16988;16992;16994;16994;21926;21926	0;0;-1424;-1424;0;0;0;0;0
chr11	77928692	77937461	8770	*	7.52	6.84	7.99	-1.15	1.62e-10	4.5e-09	119	109.5	274.76	232.68	Promoter (<=1kb)	11	77930839	77964091	33253	1	20370	uc007khn.2	0	ENSMUSG00000000632	Sez6	seizure related gene 6	uc007khn.2;uc007kho.2;uc007khp.2;uc011yaa.2;uc011xzz.1	20370;20370;20370;20370;791423	0;0;0;0;0
chr8	14091678	14102956	11279	*	8.04	7.49	8.43	-0.94	1.65e-10	4.56e-09	181	178.04	362.28	328.53	Promoter (<=1kb)	8	14095875	14847687	751813	1	244310	uc009kyy.3	0	ENSMUSG00000047495	Dlgap2	DLG associated protein 2	uc009kyx.1;uc009kyy.3;uc012gac.2	234086;244310;244310	-1351;0;0
chr14	57520890	57546187	25298	*	8.86	8.44	9.18	-0.74	1.69e-10	4.68e-09	371	324.04	601.58	561.21	Promoter (<=1kb)	14	57524829	57543166	18338	1	239114	uc007udc.1	0	ENSMUSG00000050222	Il17d	interleukin 17D	uc007udb.2;uc007udc.1;uc007udd.1	21821;239114;68043	96819;0;25382
chr7	141289645	141296183	6539	*	7.23	6.48	7.72	-1.24	1.79e-10	4.94e-09	97	81.01	212.71	209.17	Promoter (<=1kb)	7	141292006	141295001	2996	1	13491	uc009kkm.1	0	ENSMUSG00000025496	Drd4	dopamine receptor D4	uc009kkm.1;uc009kkn.2;uc009kko.3;uc033jdc.1;uc009kkp.2;uc012fww.1	13491;54006;54006;54006;54006;54006	0;31542;31542;31542;42600;31542
chr7	128415256	128432715	17460	*	8.32	7.84	8.68	-0.85	1.87e-10	5.14e-09	229	227.89	423.21	398.46	Promoter (<=1kb)	7	128373625	128418172	44548	2	67865	uc009jyw.1	0	ENSMUSG00000030844	Rgs10	regulator of G-protein signalling 10	uc009jyw.1;uc009jyx.1	67865;67865	0;0
chr5	93037090	93053160	16071	*	8.24	7.71	8.63	-0.92	1.98e-10	5.43e-09	234	185.16	409.36	383.39	Promoter (<=1kb)	5	93041123	93045022	3900	2	78088	uc008ydw.1	0	ENSMUSG00000045314	Sowahb	sosondowah ankyrin repeat domain family member B	uc008ydw.1	78088	0
chr15	101037477	101056066	18590	*	8.34	7.85	8.71	-0.85	2.04e-10	5.6e-09	231	230.56	439.83	394.84	Promoter (<=1kb)	15	101050192	101054399	4208	2	668225	uc029sve.2	0	ENSMUSG00000095440	Fignl2	fidgetin-like 2	uc007xsh.2;uc007xsj.3;uc029sve.2	20273;20273;668225	0;0;0
chr6	48436204	48452135	15932	*	7.97	7.39	8.39	-0.99	2.06e-10	5.62e-09	177	159.35	361.17	308.03	Promoter (<=1kb)	6	48448229	48501250	53022	1	243369	uc029vvf.1	0	ENSMUSG00000029797	Sspo	SCO-spondin	uc029vvf.1;uc009bue.1;uc012eld.1;uc009buf.1;uc009bug.1;uc009buh.1;uc009bui.1;uc009buj.1	243369;68910;68910;68910;68910;68910;68910;68910	0;0;0;0;0;0;0;0
chr3	89315524	89327873	12350	*	7.74	7.09	8.18	-1.09	2.13e-10	5.81e-09	146	127.3	318.52	262.82	Promoter (<=1kb)	3	89314951	89322879	7929	2	13638	uc008pyq.1	0	ENSMUSG00000028039	Efna3	ephrin A3	uc008pyq.1	13638	0
chr2	119740143	119750321	10179	*	7.53	6.87	7.97	-1.1	2.14e-10	5.82e-09	118	116.62	257.03	245.95	Promoter (<=1kb)	2	119742337	119751253	8917	1	228550	uc008luf.1	0	ENSMUSG00000027296	Itpka	inositol 1,4,5-trisphosphate 3-kinase A	uc008lug.1;uc008luh.2;uc008lui.1;uc008luj.1;uc008luf.1;uc008lue.2	17005;17005;17005;17005;228550;76246	0;0;0;0;0;65075
chr17	26199008	26207470	8463	*	7.24	6.5	7.72	-1.22	2.23e-10	6.07e-09	88	93.47	214.38	208.57	Promoter (<=1kb)	17	26199183	26201350	2168	2	14570	uc008bdp.1	0	ENSMUSG00000073433	Arhgdig	Rho GDP dissociation inhibitor (GDI) gamma	uc008bdm.2;uc008bdn.2;uc008bdp.1;uc008bdq.1;uc008bdr.1;uc008bds.1;uc008bdt.1;uc057kwu.1;uc008bdo.1;uc012ans.1	12005;12005;14570;50782;50782;50782;50782;50782;69191;69191	60322;60322;0;0;0;0;0;-372;0;0
chr11	70213282	70216997	3716	*	6.4	5.26	7.03	-1.76	2.33e-10	6.31e-09	35	41.84	142.36	118.75	Promoter (<=1kb)	11	70213910	70216412	2503	1	216867	uc007jtz.2	0	ENSMUSG00000040938	Slc16a11	solute carrier family 16 (monocarboxylic acid transporters), member 11	uc007jtz.2;uc007jua.2;uc007jub.1	216867;216867;69309	0;0;0
chr5	121825006	121848320	23315	*	8.49	8.04	8.83	-0.79	2.36e-10	6.4e-09	259	267.06	464.76	447.28	Promoter (<=1kb)	5	121815481	121836104	20624	2	16923	uc057bvj.1	0	ENSMUSG00000042594	Sh2b3	SH2B adaptor protein 3	uc057bvj.1;uc008zkg.2;uc008zkh.2;uc008zki.2;uc008zkj.1;uc008zkk.1	16923;16923;16923;16923;231717;231717	0;0;0;0;-708;-708
chr14	70513903	70543991	30089	*	8.93	8.54	9.24	-0.69	2.47e-10	6.67e-09	385	361.42	612.66	594.97	Promoter (<=1kb)	14	70474555	70520260	45706	2	12153	uc007uoc.2	0	ENSMUSG00000022098	Bmp1	bone morphogenetic protein 1	uc007uob.2;uc007uoc.2;uc007uod.2;uc007uoe.3;uc007uof.2;uc007uog.2;uc007uoh.2;uc007uoi.2	12153;12153;12153;20389;213469;213469;213469;72549	-4989;0;0;0;0;0;0;-1260
chr8	94674263	94794598	120336	*	11.18	10.98	11.36	-0.38	2.65e-10	7.15e-09	1969	2068.85	2737.59	2525.76	Promoter (<=1kb)	8	94745684	94751388	5705	1	20299	uc009mww.1	0	ENSMUSG00000031779	Ccl22	chemokine (C-C motif) ligand 22	uc009mwt.3;uc009mwu.3;uc009mww.1;uc009mwx.2;uc009mwv.1	107566;107566;20299;20312;67801	0;0;0;0;0
chr12	108302960	108340323	37364	*	9.15	8.77	9.45	-0.68	2.81e-10	7.56e-09	437	435.31	746.16	655.25	Promoter (<=1kb)	12	108334381	108362234	27854	1	13116	uc007ozo.1	0	ENSMUSG00000021259	Cyp46a1	cytochrome P450, family 46, subfamily a, polypeptide 1	uc007ozo.1;uc007ozn.1	13116;214305	0;0
chr9	31877249	31934627	57379	*	9.98	9.69	10.21	-0.52	2.85e-10	7.65e-09	819	837.69	1223.11	1148.95	Promoter (<=1kb)	9	31846044	31913285	67242	2	12023	uc009oru.1	0	ENSMUSG00000032033	Barx2	BarH-like homeobox 2	uc009oru.1	12023	0
chr2	180481815	180508138	26324	*	8.57	8.14	8.91	-0.77	2.88e-10	7.73e-09	283	279.53	498	464.16	Promoter (<=1kb)	2	180499976	180544219	44244	1	18216	uc012cmd.1	0	ENSMUSG00000027568	Ntsr1	neurotensin receptor 1	uc012cmd.1;uc008ojg.1	18216;18216	0;0
chr2	164965575	164972173	6599	*	7.08	6.27	7.59	-1.32	2.93e-10	7.84e-09	75	79.23	208.28	177.23	Promoter (<=1kb)	2	164967988	164999731	31744	1	57138	uc008nwu.2	0	ENSMUSG00000017740	Slc12a5	solute carrier family 12, member 5	uc012cjf.2;uc056zqu.1;uc008nwu.2	57138;57138;57138	0;0;0
chr7	28289026	28303067	14042	*	8.05	7.51	8.44	-0.93	2.97e-10	7.93e-09	176	188.72	360.62	332.75	Promoter (<=1kb)	7	28293555	28301785	8231	2	13389	uc009fye.1	0	ENSMUSG00000003436	Dll3	delta like canonical Notch ligand 3	uc009fye.1;uc009fyd.1;uc009fyg.1	13389;280621;66525	0;0;8979
chr16	91256314	91308152	51839	*	9.61	9.27	9.88	-0.61	3.17e-10	8.43e-09	610	624.93	1004.3	880.1	Promoter (<=1kb)	16	91269769	91271939	2171	1	50914	uc007zxf.1	0	ENSMUSG00000046160	Olig1	oligodendrocyte transcription factor 1	uc007zxf.1	50914	0
chr12	118830055	118869958	39904	*	9.6	9.29	9.85	-0.56	3.27e-10	8.68e-09	633	617.81	923.43	924.1	Promoter (<=1kb)	12	118846329	118852578	6250	1	320145	uc007pih.2	0	ENSMUSG00000048562	Sp8	trans-acting transcription factor 8	uc007pih.2;uc007pig.2;uc033ggm.1;uc007pij.2	320145;320145;77706;77706	0;0;0;0
chr3	55772767	55793105	20339	*	8.84	8.43	9.16	-0.73	3.29e-10	8.73e-09	329	359.64	596.6	546.14	Promoter (<=1kb)	3	55782510	55785287	2778	1	17116	uc008pgv.2	0	ENSMUSG00000056947	Mab21l1	mab-21-like 1 (C. elegans)	uc008pgv.2;uc008pgt.2;uc033htl.1	17116;26422;26422	0;0;0
chr8	122025153	122134729	109577	*	10.83	10.62	11.02	-0.4	3.34e-10	8.85e-09	1526	1623.74	2058.46	2091.14	3' UTR	8	121950492	122029260	78769	1	53325	uc009nsg.3	74661	ENSMUSG00000025316	Banp	BTG3 associated nuclear protein	uc009nsg.3;uc009nsh.3;uc012gma.2;uc033jih.1;uc009nsi.3	53325;53325;53325;53325;53325	0;0;0;0;0
chr13	94696986	94726067	29082	*	9.13	8.76	9.42	-0.65	3.46e-10	9.14e-09	450	419.29	688	677.55	Distal Intergenic	13	94788943	94842899	53957	1	21371	uc007rlx.1	-62876	ENSMUSG00000042043	Tbca	tubulin cofactor A	NA	NA	NA
chr6	23242406	23288404	45999	*	9.81	9.48	10.07	-0.59	3.59e-10	9.47e-09	756	673.89	1144.45	1012.72	Promoter (<=1kb)	6	23245047	23248264	3218	2	73191	uc009bbd.2	0	ENSMUSG00000029697	Fezf1	Fez family zinc finger 1	uc009bbg.3;uc033ioh.2;uc033ioi.2;uc057lpd.1;uc012ein.1;uc009bbd.2	320405;320405;320405;320405;320405;73191	0;0;0;0;0;0
chr10	62116801	62136028	19228	*	8.42	7.96	8.78	-0.82	3.61e-10	9.49e-09	238	259.05	455.34	421.36	Promoter (<=1kb)	10	62133090	62134763	1674	1	11925	uc007fgu.1	0	ENSMUSG00000044312	Neurog3	neurogenin 3	uc007fgu.1	11925	0
chr7	144937316	144948285	10970	*	7.66	7.02	8.11	-1.09	3.69e-10	9.67e-09	127	131.75	304.12	248.36	Promoter (<=1kb)	7	144929931	144939925	9995	2	12443	uc009kqt.1	0	ENSMUSG00000070348	Ccnd1	cyclin D1	uc009kqt.1;uc012fyc.1	12443;12443	0;0
chr6	112487577	112490987	3411	*	6.54	5.52	7.13	-1.61	3.87e-10	1.01e-08	44	48.07	148.46	132.01	Promoter (<=1kb)	6	112473684	112488394	14711	2	18430	uc057lrc.1	0	ENSMUSG00000049112	Oxtr	oxytocin receptor	uc057lrc.1;uc009deb.2;uc057lrd.1	18430;18430;18430	0;0;0
chr8	122617475	122777442	159968	*	11.45	11.12	11.72	-0.6	4.39e-10	1.15e-08	2078	2365.29	3459.94	3279.27	Promoter (<=1kb)	8	122622265	122622375	111	2	102466643	uc033jij.1	0	ENSMUSG00000098500	Mir6396	microRNA 6396	uc033jij.1;uc009ntl.2;uc009ntm.2;uc009ntn.2;uc009ntr.1;uc009nts.1;uc009ntt.1;uc009ntu.1;uc009ntk.1;uc012gmj.1;uc009ntj.2	102466643;12398;12398;12398;257633;257633;257633;257633;382035;382035;59005	0;0;0;0;0;0;0;0;0;0;5849
chr4	136942265	136960522	18258	*	8.27	7.74	8.66	-0.92	5.21e-10	1.36e-08	216	210.09	448.14	358.07	Promoter (<=1kb)	4	136929419	136956816	27398	2	13842	uc008vis.1	0	ENSMUSG00000028661	Epha8	Eph receptor A8	uc008vis.1	13842	0
chr5	128431501	128448101	16601	*	8.1	7.58	8.48	-0.9	5.33e-10	1.39e-08	183	199.41	373.91	341.19	Promoter (<=1kb)	5	127783491	128433077	649587	2	243274	uc008zse.1	0	ENSMUSG00000034310	Tmem132d	transmembrane protein 132D	uc008zse.1	243274	0
chr11	50842773	50853771	10999	*	7.7	7.1	8.12	-1.01	5.37e-10	1.39e-08	136	138.87	285.28	270.06	Promoter (<=1kb)	11	50850685	50852433	1749	1	108072	uc007iss.1	0	ENSMUSG00000000617	Grm6	glutamate receptor, metabotropic 6	uc007iss.1;uc007isu.2;uc007isv.1;uc007isr.2;uc011xui.2	108072;108072;108072;214779;214779	0;0;-3053;-1221;-1221
chr12	107905615	107921084	15470	*	8.08	7.56	8.47	-0.9	5.38e-10	1.39e-08	179	199.41	345.66	361.08	3' UTR	12	107910403	108003414	93012	2	58208	uc007ozh.1	82330	ENSMUSG00000048251	Bcl11b	B cell leukemia/lymphoma 11B	uc007ozh.1;uc007ozi.1;uc011yrp.1	58208;58208;58208	0;0;0
chr17	34179561	34204000	24440	*	8.5	8.05	8.85	-0.8	5.48e-10	1.42e-08	258	270.62	486.36	433.42	Promoter (<=1kb)	17	34182099	34187330	5232	2	16912	uc008cbs.1	0	ENSMUSG00000096727	Psmb9	proteasome (prosome, macropain) subunit, beta type 9 (large multifunctional peptidase 2)	uc008cbs.1;uc012apv.1;uc008cbt.2;uc008cbu.2;uc012apt.1;uc012apu.1;uc008cbv.2;uc008cbx.2	16912;16913;21354;21354;21354;21354;21354;21355	0;0;0;0;0;0;0;-479
chr2	119752236	119762511	10276	*	7.67	7.05	8.1	-1.05	5.57e-10	1.44e-08	142	123.74	289.16	259.81	Promoter (<=1kb)	2	119751326	119758525	7200	2	17005	uc008lug.1	0	ENSMUSG00000027297	Ltk	leukocyte tyrosine kinase	uc008lug.1;uc008luh.2;uc008lui.1;uc008luj.1;uc008luf.1;uc008lum.2;uc008luk.2;uc008lul.2;uc008lun.2	17005;17005;17005;17005;228550;68925;68925;68925;68925	0;0;0;0;0;25001;25026;25026;25026
chr8	104134716	104224769	90054	*	10.75	10.54	10.94	-0.4	5.63e-10	1.45e-08	1457	1510.68	2004.17	1916.32	Promoter (<=1kb)	8	104170513	104219098	48586	1	65115	uc009mzy.3	0	ENSMUSG00000031872	Bean1	brain expressed, associated with Nedd4, 1	uc009mzx.2;uc009naa.2;uc009nab.2;uc009mzy.3;uc012giu.2;uc012giv.2	12562;57813;57813;65115;65115;65115	0;0;0;0;0;0
chr17	28358314	28366370	8057	*	7.38	6.68	7.84	-1.16	5.65e-10	1.45e-08	114	91.69	237.09	222.44	Promoter (<=1kb)	17	28351519	28358694	7176	2	22157	uc008bqu.1	0	ENSMUSG00000037446	Tulp1	tubby like protein 1	uc008bqu.1;uc008bqv.1;uc008bqw.1;uc008bqx.1;uc008bqy.1	22157;22157;22157;22157;22157	0;0;-1938;0;0
chr1	133346597	133367049	20453	*	8.99	8.61	9.3	-0.69	5.86e-10	1.5e-08	365	415.73	643.68	616.07	Promoter (<=1kb)	1	133350674	133360320	9647	1	19701	uc007cqf.2	0	ENSMUSG00000070645	Ren1	renin 1 structural	uc007cqf.2;uc011wsa.2;uc007cqg.2;uc007cqh.4;uc007cqi.4	19701;214253;214253;214253;214253	0;0;0;0;0
chr5	30099820	30115720	15901	*	8.2	7.7	8.58	-0.87	5.93e-10	1.52e-08	222	194.96	367.27	396.04	Promoter (<=1kb)	5	30105196	30118380	13185	1	242915	uc012dtz.1	0	ENSMUSG00000044576	Garem2	GRB2 associated regulator of MAPK1 subtype 2	uc008wuz.3;uc012dtz.1;uc012dua.1;uc008wva.1;uc008wvc.1	242914;242915;242915;433868;97212	6880;0;0;0;39260
chr7	123977003	123988017	11015	*	7.8	7.23	8.21	-0.98	6.08e-10	1.55e-08	153	147.77	307.99	285.13	Promoter (<=1kb)	7	123983181	124398989	415809	1	628779	uc029woh.1	0	ENSMUSG00000078591	Hs3st4	heparan sulfate (glucosamine) 3-O-sulfotransferase 4	uc029woh.1	628779	0
chr9	37426419	37440711	14293	*	8.06	7.53	8.44	-0.91	6.45e-10	1.64e-08	183	186.05	368.93	326.72	Promoter (<=1kb)	9	37416045	37433175	17131	2	19649	uc012gqz.1	0	ENSMUSG00000032128	Robo3	roundabout guidance receptor 3	uc012gqz.1;uc009ouw.1	19649;19649	0;0
chr11	59132500	59140727	8228	*	7	6.11	7.54	-1.43	6.46e-10	1.64e-08	70	68.55	217.15	155.52	Promoter (<=1kb)	11	58994256	59136375	142120	2	380698	uc029rlw.1	0	ENSMUSG00000061462	Obscn	obscurin, cytoskeletal calmodulin and titin-interacting RhoGEF	uc029rlw.1;uc029rlx.1	380698;380698	0;0
chr18	74434777	74450545	15769	*	8.09	7.58	8.48	-0.9	6.49e-10	1.65e-08	206	175.37	362.28	349.63	Promoter (<=1kb)	18	74442619	74659060	216442	1	17919	uc008fpo.1	0	ENSMUSG00000025885	Myo5b	myosin VB	uc008fpo.1;uc008fpp.1	17919;17919	0;0
chr11	116102342	116113111	10770	*	7.69	7.09	8.11	-1.02	6.73e-10	1.71e-08	145	128.19	285.84	268.25	Promoter (<=1kb)	11	116105750	116108106	2357	2	217333	uc007mjw.2	0	ENSMUSG00000020773	Trim47	tripartite motif-containing 47	uc007mjw.2;uc007mjx.2;uc007mjy.2	217333;217333;217333	0;0;0
chr4	152309618	152317584	7967	*	7.34	6.63	7.82	-1.19	7.07e-10	1.79e-08	106	91.69	244.84	205.56	Promoter (1-2kb)	4	152307023	152318625	11603	2	433809	uc008waf.2	1041	ENSMUSG00000058498	Rnf207	ring finger protein 207	uc008waf.2;uc012dqb.1;uc008wag.2;uc008wad.2;uc029vba.1	433809;433809;433809;57295;57295	0;0;0;0;0
chr11	87759958	87767570	7613	*	7.43	6.76	7.88	-1.12	7.29e-10	1.84e-08	116	100.59	244.84	226.05	Promoter (<=1kb)	11	87760541	87785928	25388	1	207777	uc007kum.2	0	ENSMUSG00000034156	Tspoap1	TSPO associated protein 1	uc033fzd.1;uc007kum.2;uc011yca.1	102466883;207777;387160	-3003;0;3094
chr8	12423050	12435554	12505	*	7.93	7.37	8.33	-0.96	7.44e-10	1.88e-08	170	161.13	344.55	298.99	Exon (uc012fzm.1/434280, exon 2 of 8)	8	12385771	12436732	50962	1	434280	uc012fzm.1	37279	ENSMUSG00000047935	Sox1ot	Sox1 overlapping transcript	uc012fzm.1	434280	0
chr8	71624106	71718418	94313	*	10.93	10.46	11.28	-0.82	7.85e-10	1.98e-08	1295	1521.37	2614.62	2355.17	Promoter (<=1kb)	8	71631047	71631106	60	2	102466799	uc033jgd.1	0	ENSMUSG00000098976	Mir6769b	microRNA 6769b	uc033jgd.1;uc009meq.2;uc009mek.2;uc009mel.2;uc009mem.2;uc009men.1;uc009mep.2;uc029wtt.1;uc009mee.2;uc009mef.1;uc033jgc.1;uc009mej.2;uc009mer.4;uc009mes.3;uc033jge.1;uc009meu.2	102466799;16336;16453;16453;16453;16453;16453;234407;234407;234407;382018;382018;72297;72297;74015;74015	0;0;0;0;0;0;0;13082;0;6921;0;0;0;0;0;0
chr10	79917625	79923291	5667	*	7.07	6.28	7.58	-1.3	7.9e-10	1.99e-08	86	69.44	204.41	177.83	Promoter (<=1kb)	10	79916971	79922022	5052	1	114229	uc011xih.1	654	ENSMUSG00000035773	Kiss1r	KISS1 receptor	uc007gan.1;uc011xih.1;uc007gao.3;uc007gap.2;uc011xii.2;uc007gaq.2	109284;114229;114229;13496;13496;13496	-695;0;0;-3752;-3752;-4050
chr15	11032055	11039880	7826	*	7.48	6.81	7.94	-1.13	7.99e-10	2e-08	127	97.03	254.26	235.7	Promoter (<=1kb)	15	11033717	11037968	4252	2	239336	uc007vgy.1	0	ENSMUSG00000060735	Rxfp3	relaxin family peptide receptor 3	uc007vgx.1;uc007vgy.1	22293;239336	31334;0
chr8	120433754	120507427	73674	*	10.18	9.89	10.42	-0.52	8.01e-10	2e-08	901	1002.38	1439.7	1294.83	Promoter (<=1kb)	8	120488866	120581383	92518	1	382034	uc009nqz.2	0	ENSMUSG00000031822	Gse1	genetic suppressor element 1, coiled-coil protein	uc009nqz.2	382034	0
chr1	13120612	13131681	11070	*	7.88	7.33	8.27	-0.95	8.06e-10	2.01e-08	168	153.12	305.22	313.46	Promoter (<=1kb)	1	13113428	13127163	13736	2	383491	uc007aik.1	0	ENSMUSG00000042414	Prdm14	PR domain containing 14	uc007aik.1	383491	0
chr2	163849858	163858480	8623	*	7.53	6.9	7.97	-1.07	8.42e-10	2.1e-08	116	122.85	262.57	239.31	Promoter (<=1kb)	2	163853750	163858874	5125	1	241769	uc008ntn.1	0	ENSMUSG00000035238	Kcnk15	potassium channel, subfamily K, member 15	uc008ntn.1	241769	0
chr11	95911089	95927150	16062	*	8.06	7.54	8.44	-0.89	8.48e-10	2.11e-08	191	182.49	358.96	333.95	Promoter (<=1kb)	11	95863559	95914871	51313	2	14422	uc007lax.1	0	ENSMUSG00000013418	B4galnt2	beta-1,4-N-acetyl-galactosaminyl transferase 2	uc007lax.1;uc011ydc.1	14422;14422	0;0
chr16	35474079	35566800	92722	*	11.26	11.08	11.42	-0.34	8.58e-10	2.13e-08	2152	2181.9	2802.41	2672.84	Promoter (<=1kb)	16	35541362	35664258	122897	1	20357	uc007zbm.2	0	ENSMUSG00000052133	Sema5b	sema domain, seven thrombospondin repeats (type 1 and type 1-like), transmembrane domain (TM) and short cytoplasmic domain, (semaphorin) 5B	uc007zbm.2;uc012aez.1;uc029swy.1;uc007zbl.1	20357;20357;69768;72599	0;0;0;0
chr5	125527836	125537981	10146	*	7.59	6.98	8.02	-1.04	8.8e-10	2.18e-08	129	123.74	270.88	249.56	Promoter (<=1kb)	5	125532418	125792583	260166	1	208151	uc012eds.1	0	ENSMUSG00000070498	Tmem132b	transmembrane protein 132B	uc012eds.1	208151	0
chr5	75142082	75155213	13132	*	7.77	7.18	8.19	-1.02	8.99e-10	2.22e-08	136	153.12	314.64	270.66	Promoter (<=1kb)	5	75152291	75175150	22860	1	18595	uc008xua.1	0	ENSMUSG00000029231	Pdgfra	platelet derived growth factor receptor, alpha polypeptide	uc008xtz.1;uc008xua.1;uc008xub.1;uc008xuc.1;uc008xud.1;uc008xue.1	100503184;18595;18595;18595;18595;18595	0;0;0;0;0;-953
chr5	137024503	137035298	10796	*	7.65	7.01	8.1	-1.09	9.05e-10	2.24e-08	112	145.1	294.14	254.38	Promoter (<=1kb)	5	137026392	137033351	6960	1	381677	uc057lof.1	0	ENSMUSG00000037428	Vgf	VGF nerve growth factor inducible	uc009abm.1;uc057lof.1;uc009abl.1	11769;381677;381677	0;0;0
chr6	29163326	29198158	34833	*	9.15	8.8	9.43	-0.64	9.08e-10	2.24e-08	427	463.8	696.31	687.8	Promoter (<=1kb)	6	29169230	29179584	10355	2	101359	uc009bcz.2	0	ENSMUSG00000079654	Prrt4	proline-rich transmembrane protein 4	uc009bcz.2;uc009bda.2;uc009bdb.2;uc009bdc.2;uc009bcy.2	101359;23917;23917;23917;68272	0;14139;0;0;0
chr2	10360324	10390240	29917	*	9.04	8.66	9.34	-0.68	9.1e-10	2.24e-08	421	389.91	688	612.45	Promoter (<=1kb)	2	10370451	10439137	68687	1	353282	uc008iht.2	0	ENSMUSG00000061186	Sfmbt2	Scm-like with four mbt domains 2	uc008iht.2;uc008ihu.2;uc008ihv.2;uc008ihw.2;uc008ihx.2;uc008ihy.2;uc008ihz.1	353282;353282;353282;353282;353282;353282;353282	0;0;0;0;0;0;-3007
chr11	85907058	85943841	36784	*	9.25	8.91	9.53	-0.62	9.31e-10	2.29e-08	462	500.3	751.15	726.98	3' UTR	11	85890063	85916097	26035	1	21387	uc007ksc.2	16995	ENSMUSG00000000094	Tbx4	T-box 4	uc007ksc.2;uc007ksd.2	21387;21387	0;0
chr9	95549330	95570887	21558	*	8.64	8.23	8.97	-0.74	9.45e-10	2.32e-08	289	309.79	519.6	482.25	Promoter (<=1kb)	9	95559817	95562121	2305	1	75552	uc009rbf.1	0	ENSMUSG00000064225	Paqr9	progestin and adipoQ receptor family member IX	uc009rbf.1	75552	0
chr1	127670814	127682418	11605	*	7.83	7.25	8.23	-0.98	9.67e-10	2.37e-08	151	154.01	321.84	280.31	Promoter (<=1kb)	1	127486552	127678021	191470	2	72160	uc007cku.1	0	ENSMUSG00000026347	Tmem163	transmembrane protein 163	uc007cku.1;uc011wqz.1	72160;72160	0;0
chr10	80180050	80192827	12778	*	7.65	7.06	8.07	-1.01	9.85e-10	2.4e-08	134	133.53	273.09	265.23	Promoter (<=1kb)	10	80179482	80190010	10529	1	13637	uc007gcg.2	568	ENSMUSG00000003070	Efna2	ephrin A2	uc007gcg.2;uc007gcf.1	13637;69770	0;7106
chr15	79797651	79817152	19502	*	8.38	7.93	8.73	-0.8	9.92e-10	2.42e-08	237	250.15	435.95	411.11	Promoter (<=1kb)	15	79786351	79804709	18359	2	73340	uc007wul.2	0	ENSMUSG00000022421	Nptxr	neuronal pentraxin receptor	uc007wum.1;uc007wun.1;uc007wul.2	504193;504193;73340	0;0;0
chr2	164370942	164414810	43869	*	9.4	9.07	9.67	-0.6	1.01e-09	2.45e-08	549	523.44	850.86	777.62	Promoter (<=1kb)	2	164389393	164404818	15426	2	17183	uc008num.3	0	ENSMUSG00000016995	Matn4	matrilin 4	uc008num.3;uc029uia.1;uc008nun.3;uc008nuo.1;uc008nup.1	17183;17183;17183;19668;19668	0;0;0;0;0
chr2	22617539	22636244	18706	*	8.63	8.21	8.96	-0.75	1.06e-09	2.58e-08	306	286.65	520.71	473.81	Promoter (<=1kb)	2	22622327	22625073	2747	1	14417	uc008ini.1	0	ENSMUSG00000026787	Gad2	glutamic acid decarboxylase 2	uc008ini.1;uc008inj.1;uc008ink.1;uc029tvw.2	14417;14417;14417;667663	0;0;0;0
chr4	116010813	116020178	9366	*	7.47	6.82	7.92	-1.1	1.09e-09	2.64e-08	118	107.72	260.35	224.85	Promoter (<=1kb)	4	115967145	116017902	50758	2	14073	uc012djg.1	0	ENSMUSG00000034171	Faah	fatty acid amide hydrolase	uc012djg.1;uc008ufs.2;uc008uft.1	14073;14073;14073	0;0;0
chr11	95115151	95128368	13218	*	7.84	7.28	8.25	-0.97	1.1e-09	2.67e-08	151	160.24	321.84	286.33	Promoter (<=1kb)	11	95120117	95125293	5177	1	13393	uc007kzy.3	0	ENSMUSG00000001510	Dlx3	distal-less homeobox 3	uc007kzy.3	13393	0
chr19	45064111	45089206	25096	*	8.71	8.28	9.05	-0.77	1.12e-09	2.7e-08	286	334.72	562.81	495.51	Promoter (<=1kb)	19	45075241	45079289	4049	1	107250	uc008hqs.2	0	ENSMUSG00000025213	Kazald1	Kazal-type serine peptidase inhibitor domain 1	uc008hqs.2;uc008hqt.2	107250;107250	0;0
chr15	98165665	98185507	19843	*	8.45	8.01	8.79	-0.78	1.12e-09	2.7e-08	255	259.94	460.33	424.38	Promoter (<=1kb)	15	98167806	98170134	2329	1	239650	uc011zys.1	0	ENSMUSG00000029875	Ccdc184	coiled-coil domain containing 184	uc011zys.1;uc007xma.1;uc007xmb.2;uc011zyr.1	239650;545140;545140;78541	0;10035;35549;-87
chr8	94469737	94546276	76540	*	10.38	10.14	10.59	-0.45	1.13e-09	2.72e-08	1078	1173.3	1543.29	1529.92	Promoter (<=1kb)	8	94505046	94505105	60	1	102466800	uc033jgv.1	0	ENSMUSG00000098511	Mir7072	microRNA 7072	uc033jgv.1;uc009mwl.1;uc009mwm.1;uc012gip.1;uc012gio.1;uc009mwj.2	102466800;234577;234577;234577;434341;434341	0;0;0;0;0;0
chr9	56792664	56803574	10911	*	7.68	7.06	8.1	-1.04	1.19e-09	2.85e-08	118	149.56	273.09	277.29	Distal Intergenic	9	56848659	56851963	3305	2	382075	uc009ptj.1	48389	ENSMUSG00000045620	Odf3l1	outer dense fiber of sperm tails 3-like 1	NA	NA	NA
chr4	46036807	46040799	3993	*	6.94	6.14	7.45	-1.31	1.24e-09	2.98e-08	67	73.89	175.05	174.21	Promoter (<=1kb)	4	46039222	46116032	76811	1	21916	uc008ste.1	0	ENSMUSG00000028328	Tmod1	tropomodulin 1	uc008stb.2;uc008stc.2;uc008ste.1	100121;100121;21916	0;0;0
chr3	30488516	30525622	37107	*	9.45	9.11	9.72	-0.61	1.28e-09	3.06e-08	572	535.91	897.39	793.9	Promoter (<=1kb)	3	30236569	30509487	272919	2	14013	uc008ouv.1	0	ENSMUSG00000027684	Mecom	MDS1 and EVI1 complex locus	uc008our.1;uc008ouv.1	14013;14013	0;0
chr19	56865771	56880754	14984	*	8.12	7.62	8.49	-0.87	1.36e-09	3.26e-08	207	186.05	370.59	347.22	Promoter (<=1kb)	19	56874416	56912078	37663	1	240675	uc008hzl.1	0	ENSMUSG00000025082	Vwa2	von Willebrand factor A domain containing 2	uc008hzl.1;uc008hzi.1;uc008hzj.1;uc012bnt.1;uc008hzk.1	240675;83561;83561;83561;83561	0;0;0;0;0
chr7	109167704	109177315	9612	*	7.56	6.94	7.99	-1.05	1.4e-09	3.35e-08	114	131.75	262.57	247.15	Promoter (<=1kb)	7	109138565	109170512	31948	2	109594	uc057aiy.1	0	ENSMUSG00000036111	Lmo1	LIM domain only 1	uc057aiy.1;uc009jdk.2;uc057aiz.1	109594;109594;109594	0;0;0
chr17	46481629	46497537	15909	*	8.08	7.57	8.46	-0.89	1.42e-09	3.38e-08	191	187.83	376.13	327.93	Promoter (<=1kb)	17	46442448	46487675	45228	2	106763	uc008csx.2	0	ENSMUSG00000015599	Ttbk1	tau tubulin kinase 1	uc008csx.2;uc008csy.2;uc008csz.1;uc008ctb.2;uc008ctc.2;uc008ctd.1	106763;106763;381101;78309;78309;78309	0;0;0;23128;48851;28398
chr14	104432201	104479557	47357	*	9.9	9.62	10.13	-0.51	1.48e-09	3.51e-08	799	775.37	1162.18	1081.44	Promoter (<=1kb)	14	104462320	104467999	5680	2	18996	uc007uxb.3	0	ENSMUSG00000048349	Pou4f1	POU domain, class 4, transcription factor 1	uc007uxb.3;uc007uxc.1	18996;72486	0;0
chr14	58060237	58085541	25305	*	8.93	8.53	9.25	-0.72	1.62e-09	3.84e-08	407	331.16	636.48	582.31	Promoter (<=1kb)	14	58072686	58112720	40035	1	14180	uc007udx.2	0	ENSMUSG00000021974	Fgf9	fibroblast growth factor 9	uc007udx.2;uc007udy.2	14180;14180	0;0
chr14	46377798	46403407	25610	*	8.79	8.39	9.11	-0.72	1.66e-09	3.93e-08	344	325.82	585.52	516	Promoter (<=1kb)	14	46379524	46383608	4085	1	100041724	uc029siq.2	0	ENSMUSG00000079261	Gm15217	predicted gene 15217	uc029siq.2;uc007thd.3;uc011zjm.3	100041724;12159;12159	0;0;0
chr17	32388252	32399709	11458	*	7.68	7.07	8.1	-1.03	1.71e-09	4.03e-08	119	150.45	275.86	273.67	Promoter (<=1kb)	17	32354050	32388950	34901	2	22404	uc008bwo.2	0	ENSMUSG00000024050	Wiz	widely-interspaced zinc finger motifs	uc008bwn.2;uc008bwo.2;uc008bwq.2;uc008bwr.1;uc012aoy.1;uc008bws.2;uc008bwt.2;uc057kxb.1;uc008bwu.1;uc008bwv.1;uc008bww.1;uc008bwx.2	22404;22404;22404;22404;22404;22404;22404;320484;320484;320484;320484;664702	-435;0;0;0;0;0;0;0;0;0;0;-3305
chr11	78482932	78503236	20305	*	8.59	8.17	8.92	-0.74	1.71e-09	4.03e-08	277	300.89	499.66	467.18	Promoter (<=1kb)	11	78499120	78502325	3206	1	22370	uc007kjk.2	0	ENSMUSG00000017344	Vtn	vitronectin	uc007kjl.2;uc007kjm.2;uc007kjn.1;uc007kjk.2;uc007kjh.2;uc007kji.2;uc007kjj.2	18292;18292;195040;22370;237868;237868;237868	-263;-277;8932;0;0;0;0
chr7	144895081	144911548	16468	*	8.12	7.62	8.49	-0.87	1.72e-09	4.04e-08	196	198.52	378.34	340.59	Promoter (<=1kb)	7	144896532	144900953	4422	1	14170	uc009kqr.2	0	ENSMUSG00000031073	Fgf15	fibroblast growth factor 15	uc009kqr.2;uc009kqs.1;uc012fyb.2;uc057lwd.1	14170;72284;72284;72284	0;-3646;-3646;-3646
chr4	115044749	115073056	28308	*	9.24	8.62	9.67	-1.06	1.72e-09	4.04e-08	380	405.05	906.25	725.18	Promoter (<=1kb)	4	115056426	115071755	15330	1	21349	uc008uem.2	0	ENSMUSG00000028717	Tal1	T cell acute lymphocytic leukemia 1	uc008ueh.3;uc008uei.3;uc012diz.3;uc012dja.2;uc012djb.3;uc008uej.3;uc008uem.2;uc008uek.1;uc008uel.1	20460;20460;20460;20460;20460;20460;21349;21349;21349	44631;44631;44631;44631;44631;39887;0;0;0
chr1	134642940	134651002	8063	*	7.24	6.52	7.71	-1.19	1.76e-09	4.12e-08	92	91.69	228.23	191.09	Promoter (<=1kb)	1	134646681	134741976	95296	1	20980	uc007csi.1	0	ENSMUSG00000026452	Syt2	synaptotagmin II	uc007csi.1;uc007csj.1	20980;20980	0;0
chr11	83414651	83453378	38728	*	9.14	8.8	9.41	-0.62	1.88e-09	4.39e-08	439	450.45	688.55	675.14	Promoter (<=1kb)	11	83421635	83429521	7887	2	237891	uc007koy.2	0	ENSMUSG00000020686	Gas2l2	growth arrest-specific 2 like 2	uc007kpa.2;uc007kpb.2;uc007kpc.2;uc007kpd.2;uc007koy.2;uc007kov.1;uc007kow.3;uc007kox.1;uc007koz.2	118453;118453;118453;118453;237891;276952;276952;276952;66330	0;0;0;0;0;0;0;0;0
chr8	117057445	117174600	117156	*	11.07	10.89	11.24	-0.35	2.12e-09	4.94e-08	1925	1866.77	2475.58	2359.99	Promoter (<=1kb)	8	117158135	117205186	47052	1	209239	uc009nox.1	0	ENSMUSG00000052557	Gan	giant axonal neuropathy	uc009nox.1;uc009now.2;uc012gll.1;uc012gli.1;uc012glk.1	209239;63857;63857;76645;76645	0;0;0;0;0
chr9	37449188	37464930	15743	*	8.37	7.92	8.71	-0.78	2.13e-09	4.96e-08	233	252.82	414.9	421.36	Distal Intergenic	9	37416045	37433175	17131	2	19649	uc012gqz.1	-16013	ENSMUSG00000032128	Robo3	roundabout guidance receptor 3	NA	NA	NA
chr3	107453599	107470724	17126	*	8.13	7.65	8.49	-0.85	2.15e-09	5e-08	193	207.42	370.59	350.83	Promoter (<=1kb)	3	107438303	107458898	20596	2	99738	uc008qxa.1	0	ENSMUSG00000027895	Kcnc4	potassium voltage gated channel, Shaw-related subfamily, member 4	uc012cvw.2;uc008qxb.1;uc008qxc.1;uc008qxa.1	229706;229706;229706;99738	0;0;0;0
chr8	70879870	70895333	15464	*	8.41	7.96	8.75	-0.79	2.22e-09	5.16e-08	240	257.27	450.91	408.1	Promoter (<=1kb)	8	70882889	70892757	9869	2	114479	uc009mbz.2	0	ENSMUSG00000000792	Slc5a5	solute carrier family 5 (sodium iodide symporter), member 5	uc033jga.1;uc009mcc.1;uc009mbz.2;uc009mca.2;uc009mcb.2	102465984;104370;114479;76808;76808	237;523;0;0;0
chr1	156194203	156214408	20206	*	8.48	8.04	8.81	-0.77	2.23e-09	5.17e-08	284	242.14	450.36	447.89	Promoter (<=1kb)	1	156075956	156205026	129071	2	329274	uc033fmn.1	0	ENSMUSG00000015484	Fam163a	family with sequence similarity 163, member A	uc033fmn.1	329274	0
chr14	32590408	32605975	15568	*	8.26	7.77	8.63	-0.86	2.37e-09	5.48e-08	222	215.43	432.63	359.88	Promoter (<=1kb)	14	32599408	32629000	29593	1	107751	uc011zin.2	0	ENSMUSG00000041730	Prrxl1	paired related homeobox protein-like 1	uc011zin.2;uc011zio.1;uc007szf.1;uc057kry.1;uc011zip.1	107751;107751;107751;107751;107751	0;0;0;0;0
chr14	55110453	55142433	31981	*	9.06	8.69	9.35	-0.65	2.37e-09	5.49e-08	419	409.5	690.21	614.26	Promoter (<=1kb)	14	55106826	55115552	8727	2	319984	uc007tyg.1	0	ENSMUSG00000022208	Jph4	junctophilin 4	uc007tyd.3;uc007tye.3;uc007tyf.3;uc007tyg.1;uc007tyh.2;uc007tyj.2	11766;11766;11766;319984;319984;319984	-4186;-3860;-3860;0;0;0
chr10	79714795	79718624	3830	*	6.45	5.41	7.04	-1.63	2.4e-09	5.53e-08	37	48.07	144.58	119.36	Promoter (<=1kb)	10	79716634	79736108	19475	1	15166	uc007fzn.1	0	ENSMUSG00000020331	Hcn2	hyperpolarization-activated, cyclic nucleotide-gated K+ 2	uc007fzl.1;uc007fzm.1;uc007fzn.1	12215;12215;15166	10437;10437;0
chr15	75885119	75894118	9000	*	7.63	7.01	8.05	-1.04	2.43e-09	5.58e-08	131	127.3	290.27	241.12	Promoter (<=1kb)	15	75882934	75888723	5790	2	223645	uc033guj.1	0	ENSMUSG00000098678	Mroh6	maestro heat-like repeat family member 6	uc033guj.1;uc007whi.1;uc007whj.2;uc007whk.2;uc007whl.2;uc007whm.2;uc033guk.1;uc033gul.1;uc033gum.1;uc033gun.1;uc007whn.2	223645;223646;66656;66656;66656;66656;66656;66656;66656;66656;66656	0;0;15226;15226;15226;15226;15226;15226;15438;15438;15226
chr4	139086027	139095061	9035	*	7.35	6.63	7.82	-1.19	2.46e-09	5.65e-08	86	112.17	249.28	203.75	Promoter (<=1kb)	4	139082292	139092970	10679	2	17965	uc008vls.1	0	ENSMUSG00000041120	Nbl1	neuroblastoma, suppression of tumorigenicity 1	uc008vls.1	17965	0
chr6	49818047	49832408	14362	*	8.15	7.66	8.51	-0.86	2.52e-09	5.77e-08	189	215.43	378.34	353.24	Promoter (<=1kb)	6	49822710	49829507	6798	1	109648	uc009bwt.3	0	ENSMUSG00000029819	Npy	neuropeptide Y	uc009bwt.3	109648	0
chr4	124175755	124201245	25491	*	8.67	8.26	8.99	-0.73	2.57e-09	5.89e-08	317	296.44	535.66	479.83	Distal Intergenic	4	124450239	124451288	1050	2	78460	uc008uqr.1	250043	NA	1700057H15Rik	RIKEN cDNA 1700057H15 gene	NA	NA	NA
chr9	44128607	44136611	8005	*	7.28	6.61	7.74	-1.14	2.74e-09	6.27e-08	96	98.81	226.56	201.34	Promoter (<=1kb)	9	44134658	44142726	8069	1	84004	uc009pbw.2	0	ENSMUSG00000032135	Mcam	melanoma cell adhesion molecule	uc009pbw.2;uc009pbx.2	84004;84004	0;0
chr4	149582969	149592545	9577	*	7.44	6.8	7.88	-1.07	2.8e-09	6.38e-08	114	109.5	249.28	221.23	Promoter (<=1kb)	4	149586468	149648899	62432	1	65945	uc008vwo.2	0	ENSMUSG00000039953	Clstn1	calsyntenin 1	uc008vwo.2;uc008vwp.2	65945;65945	0;0
chr4	147381641	147587505	205865	*	13.14	13.23	13.04	0.19	2.81e-09	6.4e-08	9711	9494.08	8362.35	8500.18	Promoter (<=1kb)	4	147500686	147513420	12735	1	195531	uc057lky.1	0	ENSMUSG00000078496	Zfp982	zinc finger protein 982	uc008vsu.3;uc029vau.1;uc057lky.1;uc008vsy.2	195531;195531;195531;433804	0;0;0;0
chr2	163330387	163345140	14754	*	7.71	7.15	8.12	-0.97	2.94e-09	6.68e-08	143	140.65	265.89	289.35	3' UTR	2	163336242	163397973	61732	2	59091	uc008nsp.2	52833	ENSMUSG00000017817	Jph2	junctophilin 2	uc008nsp.2;uc029uhy.1	59091;59091	0;0
chr1	154722084	154731906	9823	*	7.69	7.13	8.09	-0.97	2.95e-09	6.7e-08	139	140.65	274.2	271.87	Promoter (<=1kb)	1	154392519	154725920	333402	2	12290	uc007dav.1	0	ENSMUSG00000004110	Cacna1e	calcium channel, voltage-dependent, R type, alpha 1E subunit	uc007dav.1	12290	0
chr7	144855725	144868329	12605	*	7.87	7.31	8.27	-0.96	2.96e-09	6.71e-08	140	177.15	319.63	298.39	Promoter (<=1kb)	7	144861386	144865243	3858	1	14175	uc009kqq.1	0	ENSMUSG00000050917	Fgf4	fibroblast growth factor 4	uc009kqq.1	14175	0
chr6	126631325	126649093	17769	*	8.4	7.93	8.76	-0.82	3.01e-09	6.81e-08	254	235.02	473.62	392.43	Promoter (<=1kb)	6	126636463	126645801	9339	2	16485	uc009dvb.1	0	ENSMUSG00000047976	Kcna1	potassium voltage-gated channel, shaker-related subfamily, member 1	uc009dvb.1	16485	0
chr8	122419878	122464869	44992	*	9.7	9.4	9.94	-0.54	3.1e-09	7e-08	643	708.61	1011.5	955.45	Promoter (<=1kb)	8	122443656	122446476	2821	1	100689703	uc009nsu.2	0	NA	9330133O14Rik	RIKEN cDNA 9330133O14 gene	uc009nsu.2;uc009nsp.2;uc009nsq.2;uc009nss.2;uc009nst.2;uc012gmc.2;uc009nsw.1;uc012gmd.1;uc029wwq.1;uc009nsx.1;uc009nsy.1;uc009nsm.2;uc009nsn.2;uc012gmb.2	100689703;13057;13057;192156;192156;234836;30927;30927;319574;68718;68718;76014;76014;76014	0;0;0;0;0;0;0;0;0;11195;3485;0;0;0
chr17	14275402	14288066	12665	*	7.94	7.43	8.32	-0.88	3.24e-09	7.31e-08	174	171.81	325.17	313.46	Promoter (<=1kb)	17	14279506	14326128	46623	1	64074	uc008amw.5	0	ENSMUSG00000023886	Smoc2	SPARC related modular calcium binding 2	uc008amw.5;uc008amx.2;uc008amy.2	64074;64074;64074	0;0;0
chr6	31211504	31226172	14669	*	8.14	7.66	8.5	-0.84	3.34e-09	7.51e-08	212	193.18	353.97	368.92	Promoter (<=1kb)	6	31093563	31218474	124912	2	232685	uc033ioo.1	0	ENSMUSG00000044471	Lncpint	long non-protein coding RNA, Trp53 induced transcript	uc033ioo.1;uc009bfy.2;uc033iop.1;uc033ioq.1;uc009bfz.3;uc009bga.3;uc012ejs.3;uc029vtz.2;uc029vua.2;uc029vub.2	232685;232685;232685;232685;73652;73652;73652;73652;73652;73652	0;0;0;0;0;0;0;0;0;0
chr1	87151740	87160638	8899	*	7.6	7	8.02	-1.01	3.36e-09	7.55e-08	131	125.52	275.31	242.93	Promoter (<=1kb)	1	87147655	87156136	8482	2	13599	uc007bwd.1	0	ENSMUSG00000026247	Ecel1	endothelin converting enzyme-like 1	uc007bwd.1;uc007bwc.2	13599;13599	0;0
chr5	38274666	38280217	5552	*	7.03	6.29	7.52	-1.23	3.38e-09	7.58e-08	77	79.23	193.88	173.61	Promoter (<=1kb)	5	38275972	38304217	28246	1	21906	uc012dvn.1	0	ENSMUSG00000051596	Otop1	otopetrin 1	uc012dvn.1;uc008xgm.1	21906;21906	0;0
chr1	74094016	74105608	11593	*	7.5	6.9	7.92	-1.03	3.42e-09	7.63e-08	119	119.29	244.29	241.12	Intron (uc007blg.3/21961, intron 1 of 32)	1	73910231	74124449	214219	2	21961	uc007blg.3	18841	ENSMUSG00000055322	Tns1	tensin 1	uc007blg.3;uc011wmx.2	21961;21961	0;0
chr7	79785688	79798457	12770	*	7.74	7.16	8.15	-0.99	3.42e-09	7.63e-08	133	154.01	304.67	265.23	Promoter (<=1kb)	7	79792241	79793590	1350	2	17292	uc009hzb.2	0	ENSMUSG00000030544	Mesp1	mesoderm posterior 1	uc009hzb.2;uc009hza.1	17292;626359	0;0
chr18	11042753	11064953	22201	*	8.53	8.11	8.86	-0.75	3.42e-09	7.63e-08	273	279.53	494.12	437.03	Promoter (<=1kb)	18	11052510	11057583	5074	1	14465	uc008ebj.1	0	ENSMUSG00000005836	Gata6	GATA binding protein 6	uc008ebj.1;uc008ebk.1;uc033hfu.1;uc008ebh.4;uc008ebi.2	14465;14465;68434;68434;68434	0;0;0;0;0
chr5	114648188	114662003	13816	*	7.75	7.2	8.15	-0.95	3.43e-09	7.63e-08	152	141.54	291.93	274.88	Promoter (<=1kb)	5	114622154	114658421	36268	2	63873	uc008yzv.2	0	ENSMUSG00000014158	Trpv4	transient receptor potential cation channel, subfamily V, member 4	uc008yzv.2	63873	0
chr9	121638088	121647095	9008	*	7.42	6.77	7.87	-1.1	3.45e-09	7.66e-08	100	118.4	250.94	217.61	Promoter (<=1kb)	9	121642716	121672954	30239	1	22354	uc009sdl.2	0	ENSMUSG00000032528	Vipr1	vasoactive intestinal peptide receptor 1	uc009sdl.2;uc009sdi.1	22354;69032	0;0
chr5	33978119	34000370	22252	*	8.6	8.2	8.91	-0.71	3.45e-09	7.66e-08	289	299.11	491.9	472.6	Promoter (<=1kb)	5	33995984	34005916	9933	1	269642	uc008xbs.1	0	ENSMUSG00000048142	Nat8l	N-acetyltransferase 8-like	uc008xbs.1;uc008xbq.2;uc008xbr.3;uc057bty.1;uc008xbp.2	269642;381633;381633;381633;381633	0;0;0;0;0
chr19	53667202	53682758	15557	*	8.25	7.78	8.61	-0.83	3.46e-09	7.66e-08	203	237.69	402.72	378.56	Promoter (<=1kb)	19	53677306	53867080	189775	1	73713	uc008hwz.2	0	ENSMUSG00000043639	Rbm20	RNA binding motif protein 20	uc008hwz.2	73713	0
chr7	66423518	66429166	5649	*	7.1	6.38	7.58	-1.19	3.52e-09	7.78e-08	84	82.79	198.31	183.25	Promoter (<=1kb)	7	66390892	66427477	36586	2	56847	uc009hhi.3	0	ENSMUSG00000015134	Aldh1a3	aldehyde dehydrogenase family 1, subfamily A3	uc009hhi.3;uc009hhj.2	56847;56847	0;0
chr9	21158157	21174784	16628	*	8.08	7.6	8.45	-0.85	3.57e-09	7.88e-08	184	202.97	356.19	342.39	Promoter (<=1kb)	9	21165714	21213248	47535	1	18577	uc009oki.2	0	ENSMUSG00000032177	Pde4a	phosphodiesterase 4A, cAMP specific	uc009oki.2	18577	0
chr5	143248764	143258779	10016	*	7.54	6.93	7.96	-1.03	3.74e-09	8.23e-08	117	127.3	263.12	236.3	3' UTR	5	143235163	143248834	13672	1	231866	uc009ajt.2	13601	ENSMUSG00000029587	Zfp12	zinc finger protein 12	uc009ajt.2;uc009aju.2;uc009ajv.2;uc009ajw.2	231866;231866;231866;54201	0;0;0;0
chr8	70150095	70173620	23526	*	8.65	8.26	8.96	-0.7	4.01e-09	8.83e-08	307	308.01	492.46	503.34	Promoter (<=1kb)	8	70152761	70167488	14728	1	17259	uc009lza.2	0	ENSMUSG00000079033	Mef2b	myocyte enhancer factor 2B	uc009lyz.2;uc009lza.2;uc009lzb.2;uc012ges.2;uc012get.2;uc009lzc.2;uc009lzd.2;uc009lze.2;uc012geu.2;uc012gev.2;uc012gew.1;uc057cby.1;uc009lyx.3;uc009lyy.3;uc057cbz.2;uc057cca.2	105980076;17259;17259;17259;17259;234371;234371;234371;234371;234371;234371;72368;72368;72368;72368;72368	0;0;0;0;0;0;0;0;0;0;-3621;10596;10596;10596;10596;9818
chr7	81211054	81217007	5954	*	6.9	6.11	7.4	-1.29	4.03e-09	8.85e-08	66	72.11	177.82	160.95	Promoter (<=1kb)	7	81213804	81333622	119819	1	18584	uc009ibt.1	0	ENSMUSG00000025584	Pde8a	phosphodiesterase 8A	uc009ibt.1	18584	0
chr13	23283841	23324110	40270	*	9.68	9.39	9.92	-0.53	4.27e-09	9.36e-08	701	642.73	986.02	951.23	Promoter (<=1kb)	13	23276204	23313407	37204	2	75322	uc056ytd.1	0	ENSMUSG00000085488	4930557F10Rik	RIKEN cDNA 4930557F10 gene	uc029rzh.1;uc056ytd.1;uc056yte.1;uc056ytf.1	74061;75322;75322;75887	5491;0;0;0
chr10	44000083	44012405	12323	*	7.86	7.33	8.25	-0.93	4.28e-09	9.36e-08	149	171.81	316.3	293.57	Promoter (<=1kb)	10	43950307	44004846	54540	2	11630	uc007ezq.2	0	ENSMUSG00000019866	Crybg1	crystallin beta-gamma domain containing 1	uc007ezq.2	11630	0
chr11	63912727	63939191	26465	*	8.69	8.3	9	-0.7	4.29e-09	9.39e-08	322	309.79	530.12	493.1	Promoter (<=1kb)	11	63884693	63922284	37592	2	54710	uc007jkn.1	0	ENSMUSG00000070407	Hs3st3b1	heparan sulfate (glucosamine) 3-O-sulfotransferase 3B1	uc007jkn.1	54710	0
chr2	103962699	104004883	42185	*	9.33	9.01	9.59	-0.57	4.38e-09	9.56e-08	515	518.99	791.59	748.69	Promoter (<=1kb)	2	103969557	103981878	12322	1	16909	uc012cak.1	0	ENSMUSG00000032698	Lmo2	LIM domain only 2	uc012caj.1;uc012cak.1;uc008ljf.2;uc012cal.1	16909;16909;16909;16909	0;0;0;0
chr13	98498182	98513476	15295	*	8.14	7.65	8.5	-0.85	4.39e-09	9.56e-08	198	203.86	387.76	337.57	Distal Intergenic	13	98424110	98435065	10956	2	70090	uc029scu.1	-63117	ENSMUSG00000099446	2310005E17Rik	RIKEN cDNA 2310005E17 gene	NA	NA	NA
chr11	103740749	103754652	13904	*	8.06	7.56	8.43	-0.87	4.4e-09	9.56e-08	178	200.3	361.73	329.13	Promoter (<=1kb)	11	103727363	103749821	22459	2	22412	uc007lvr.1	0	ENSMUSG00000018486	Wnt9b	wingless-type MMTV integration site family, member 9B	uc007lvr.1	22412	0
chr3	108213038	108239945	26908	*	9.01	8.66	9.29	-0.63	4.42e-09	9.59e-08	413	397.03	635.37	614.86	Promoter (<=1kb)	3	108212266	108226599	14334	2	17306	uc008qyn.1	0	ENSMUSG00000027887	Sypl2	synaptophysin-like 2	uc008qyn.1;uc008qyo.1;uc008qyl.2;uc008qym.2	17306;17306;72522;72522	0;0;-2511;-2511
chr10	7387461	7395747	8287	*	7.78	7.24	8.18	-0.93	4.5e-09	9.74e-08	161	141.54	287.5	290.55	Distal Intergenic	10	7444873	7473477	28605	2	77777	uc029qvm.1	77730	ENSMUSG00000079685	Ulbp1	UL16 binding protein 1	NA	NA	NA
chr4	148270113	148278717	8605	*	7.28	6.62	7.73	-1.11	4.53e-09	9.81e-08	92	104.15	212.71	211.59	5' UTR	4	148236857	148287965	51109	2	242748	uc008vum.1	9248	ENSMUSG00000041544	Disp3	dispatched RND transporter family member 3	uc008vum.1;uc008vun.1;uc008vuo.1	242748;242748;242748	0;0;0
chr5	28112533	28133783	21251	*	8.34	7.9	8.68	-0.78	4.76e-09	1.03e-07	226	251.04	418.23	400.87	Distal Intergenic	5	28165696	28172166	6471	1	13799	uc008wtv.1	-31913	ENSMUSG00000039095	En2	engrailed 2	NA	NA	NA
chr5	118024553	118035969	11417	*	7.71	7.16	8.11	-0.95	4.77e-09	1.03e-07	140	145.99	275.86	275.48	Promoter (<=1kb)	5	118027824	118061870	34047	1	57816	uc008zgc.1	0	ENSMUSG00000029359	Tesc	tescalcin	uc008zgc.1;uc012ecj.1;uc008zgd.1	57816;57816;57816	0;0;-64
chr6	83751366	83765841	14476	*	7.91	7.38	8.3	-0.92	4.96e-09	1.07e-07	181	152.23	334.58	297.18	Promoter (<=1kb)	6	83761759	83762508	750	2	67934	uc033isu.1	0	ENSMUSG00000099354	1700124L16Rik	RIKEN cDNA 1700124L16 gene	uc009coc.1;uc009cof.2;uc009cog.2;uc033isu.1;uc009cod.1	110935;21766;21766;67934;75305	0;9971;9971;0;0
chr5	37235770	37250352	14583	*	7.95	7.45	8.32	-0.87	5.35e-09	1.15e-07	179	170.03	329.6	310.45	Promoter (<=1kb)	5	37242058	37292163	50106	1	12933	uc008xfl.2	0	ENSMUSG00000029121	Crmp1	collapsin response mediator protein 1	uc008xfl.2;uc012dvl.2;uc008xfm.2	12933;12933;12933	0;0;0
chr16	17911950	17920800	8851	*	7.65	7.09	8.05	-0.97	5.54e-09	1.19e-07	132	139.76	273.65	258	Promoter (<=1kb)	16	17913554	17915059	1506	2	195333	uc012aby.1	0	ENSMUSG00000022738	Gsc2	goosecoid homebox 2	uc007ymp.2;uc012aby.1;uc007ymm.1;uc007ymn.1	13358;195333;27886;27886	7419;0;-602;-602
chr11	72128860	72143567	14708	*	7.88	7.32	8.28	-0.96	5.55e-09	1.19e-07	176	143.32	338.46	283.92	Promoter (<=1kb)	11	72047528	72135889	88362	2	327958	uc007jya.1	0	ENSMUSG00000040543	Pitpnm3	PITPNM family member 3	uc007jya.1;uc007jyb.1;uc057ayw.1	327958;327958;327958	0;0;0
chr7	45162622	45190928	28307	*	9	8.33	9.45	-1.12	5.72e-09	1.22e-07	285	357.86	753.36	647.41	Promoter (<=1kb)	7	45176349	45179597	3249	2	100039953	uc012fkd.1	0	ENSMUSG00000095276	Gfy	golgi-associated olfactory signaling regulator	uc012fkd.1;uc033izg.1;uc009gtz.1;uc009gua.1;uc009gub.1;uc009gtv.1;uc009gtw.2;uc033izf.1;uc009gtx.2;uc009gty.1	100039953;102465638;114640;114640;384619;68845;68845;68845;72961;72961	0;0;0;0;0;8319;8319;6676;0;0
chr11	83849734	83855326	5593	*	7.05	6.32	7.54	-1.22	5.89e-09	1.26e-07	90	69.44	188.9	182.65	Promoter (<=1kb)	11	83850869	83905917	55049	1	21410	uc007kpx.2	0	ENSMUSG00000020679	Hnf1b	HNF1 homeobox B	uc007kpx.2;uc007kpy.2;uc056ynm.1	21410;21410;21410	0;0;0
chr3	116248733	116257118	8386	*	7.57	6.97	7.99	-1.02	6.03e-09	1.29e-07	136	114.84	268.11	239.92	Promoter (<=1kb)	3	116249654	116253484	3831	2	64378	uc008rbz.2	0	ENSMUSG00000068696	Gpr88	G-protein coupled receptor 88	uc008rbz.2	64378	0
chr12	84871867	84882892	11026	*	7.75	7.19	8.15	-0.96	6.34e-09	1.35e-07	135	157.57	299.68	269.45	Promoter (<=1kb)	12	84875802	84879755	3954	1	100303738	uc011ype.1	0	ENSMUSG00000092130	D030025P21Rik	RIKEN cDNA D030025P21 gene	uc011ype.1;uc011ypd.1;uc007ofx.1	100303738;16997;16997	0;0;0
chr2	25305691	25325283	19593	*	8.34	7.9	8.67	-0.77	6.36e-09	1.35e-07	233	244.81	421	393.63	Promoter (<=1kb)	2	25291177	25319187	28011	2	14810	uc008irh.3	0	ENSMUSG00000026959	Grin1	glutamate receptor, ionotropic, NMDA1 (zeta 1)	uc008irn.1;uc008irh.3;uc008iri.3;uc008irk.3;uc008irl.3;uc008irm.3	100272219;14810;14810;14810;14810;14810	7288;0;0;0;0;0
chr2	153067281	153076522	9242	*	7.41	6.8	7.84	-1.04	6.54e-09	1.39e-07	114	108.61	237.09	221.83	Promoter (1-2kb)	2	153065955	153081735	15781	1	228788	uc012cgo.2	1326	ENSMUSG00000027474	Ccm2l	cerebral cavernous malformation 2-like	uc012cgo.2;uc012cgp.2	228788;228788	0;0
chr4	107428152	107442349	14198	*	8.01	7.53	8.37	-0.85	6.56e-09	1.39e-07	186	182.49	329.04	333.35	Promoter (<=1kb)	4	107434591	107439094	4504	1	230587	uc008tzu.1	0	ENSMUSG00000034762	Glis1	GLIS family zinc finger 1	uc008tzu.1;uc008tzv.1;uc029uyn.1	230587;230587;230587	0;0;0
chr4	82535112	82541033	5922	*	7.29	6.63	7.73	-1.1	6.61e-09	1.4e-07	107	91.69	215.48	209.78	Distal Intergenic	4	82495984	82505779	9796	2	18028	uc008tki.3	-29333	ENSMUSG00000008575	Nfib	nuclear factor I/B	NA	NA	NA
chr9	107396395	107407479	11085	*	7.6	7.01	8.02	-1.01	6.61e-09	1.4e-07	129	128.19	281.96	236.9	Promoter (<=1kb)	9	107399880	107513332	113453	1	56808	uc012hae.1	0	ENSMUSG00000010066	Cacna2d2	calcium channel, voltage-dependent, alpha 2/delta subunit 2	uc012hae.1;uc009rli.2;uc009rlj.2;uc012haf.1;uc057apw.1;uc057apx.1	56808;56808;56808;56808;56808;56808	0;0;0;0;0;0
chr7	45359621	45370230	10610	*	7.69	7.11	8.1	-0.99	6.67e-09	1.41e-07	141	135.31	300.24	248.96	Promoter (<=1kb)	7	45366163	45367948	1786	1	50994	uc012fkj.1	0	ENSMUSG00000091510	Mtag2	metastasis associated gene 2	uc009guv.1;uc012fkj.1;uc012fkk.1;uc012fkh.1;uc012fki.1;uc009guu.2	22342;50994;50994;76787;76787;76787	0;0;0;0;0;0
chr1	180694705	180703248	8544	*	7.41	6.79	7.84	-1.05	6.8e-09	1.43e-07	117	105.04	221.02	238.71	Promoter (<=1kb)	1	180693043	180697034	3992	2	27217	uc007dwp.2	0	ENSMUSG00000026497	Mixl1	Mix1 homeobox-like 1 (Xenopus laevis)	uc007dwp.2;uc007dwm.4;uc011wxp.2;uc007dwo.1	27217;72568;72568;72568	0;53555;53555;15203
chr7	19301435	19323730	22296	*	8.46	8.01	8.79	-0.78	6.85e-09	1.44e-07	270	245.7	481.38	406.89	Promoter (<=1kb)	7	19302696	19310045	7350	2	14282	uc009flk.1	0	ENSMUSG00000003545	Fosb	FBJ osteosarcoma oncogene B	uc009flk.1;uc012fbb.3	14282;14282	0;0
chr11	118563096	118577540	14445	*	7.71	7.13	8.12	-1	6.93e-09	1.45e-07	125	154.9	297.47	260.41	Intron (uc033gbu.1/52897, intron 3 of 13)	11	118489760	118761041	271282	2	52897	uc033gbu.1	183501	ENSMUSG00000025576	Rbfox3	RNA binding protein, fox-1 homolog (C. elegans) 3	uc033gbu.1;uc007mpl.1;uc007mpm.1;uc007mpn.1;uc007mpo.1;uc007mpp.1	52897;52897;52897;52897;52897;52897	0;0;0;0;0;0
chr7	36690167	36705300	15134	*	7.9	7.37	8.29	-0.92	7.13e-09	1.49e-07	160	170.03	338.46	286.33	Promoter (<=1kb)	7	36698118	36773457	75340	1	243931	uc009gkj.1	0	ENSMUSG00000021217	Tshz3	teashirt zinc finger family member 3	uc009gkj.1	243931	0
chr2	174296727	174301067	4341	*	6.74	5.9	7.27	-1.37	7.32e-09	1.53e-07	60	59.64	167.29	141.06	Promoter (<=1kb)	2	174297859	174300805	2947	1	14683	uc008oet.2	0	ENSMUSG00000027523	Gnas	GNAS (guanine nucleotide binding protein, alpha stimulating) complex locus	uc008oeq.1;uc008oer.2;uc008oes.2;uc008oet.2;uc008oeu.3;uc008oew.3;uc033hrq.2;uc008oep.1;uc012ckw.1	14683;14683;14683;14683;14683;14683;14683;56802;56802	0;0;0;0;0;0;0;-1291;-1291
chr16	9985663	9997581	11919	*	7.72	7.18	8.12	-0.94	7.41e-09	1.55e-07	139	151.34	280.3	274.88	Promoter (<=1kb)	16	9577710	9992533	414824	2	14811	uc007ydc.1	0	ENSMUSG00000059003	Grin2a	glutamate receptor, ionotropic, NMDA2A (epsilon 1)	uc007ydc.1	14811	0
chr8	70724894	70754021	29128	*	9.21	8.88	9.47	-0.59	7.63e-09	1.59e-07	450	493.18	720.68	702.27	Promoter (<=1kb)	8	70724064	70751186	27123	1	110385	uc009mbg.2	830	ENSMUSG00000031842	Pde4c	phosphodiesterase 4C, cAMP specific	uc009mbf.2;uc012gfe.1;uc009mbg.2;uc009mbh.2;uc009mbi.2;uc009mbj.2;uc057lxm.1;uc009mbk.2;uc009mbl.1	100502950;100502950;110385;110385;19339;19339;19339;19339;234384	6351;6351;0;0;-658;-658;-658;-1489;6900
chr4	133468890	133490871	21982	*	8.36	7.93	8.7	-0.77	7.78e-09	1.62e-07	233	254.6	431.52	398.46	Promoter (<=1kb)	4	133480133	133487940	7808	1	100342	uc008vct.2	0	ENSMUSG00000046694	Tent5b	terminal nucleotidyltransferase 5B	uc008vct.2;uc008vcu.1	100342;69539	0;0
chr11	75790033	75801686	11654	*	7.59	7.01	8.01	-1	7.94e-09	1.65e-07	120	137.09	273.65	241.73	Promoter (<=1kb)	11	75795809	75853912	58104	1	102641247	uc057klo.1	0	NA	Gm12339	predicted gene 12339	uc057klo.1;uc057klp.1;uc007kev.3	102641247;102641247;13447	0;0;0
chr15	99053851	99069007	15157	*	8.04	7.56	8.41	-0.85	8.05e-09	1.67e-07	178	198.52	350.65	327.93	Promoter (<=1kb)	15	99055174	99058978	3805	1	19132	uc007xon.2	0	ENSMUSG00000023484	Prph	peripherin	uc007xon.2;uc007xoo.2;uc007xop.2	19132;19132;19132	0;0;0
chr9	106635946	106655981	20036	*	8.19	7.72	8.54	-0.82	8.28e-09	1.71e-07	199	223.44	388.87	355.66	Promoter (<=1kb)	9	106644534	106656109	11576	2	108068	uc009rkj.3	128	ENSMUSG00000023192	Grm2	glutamate receptor, metabotropic 2	uc009rkj.3;uc012gzy.2;uc009rkk.2;uc009rkm.1;uc009rkl.2;uc009rkn.2;uc033jms.1	108068;108068;21767;21767;21767;21767;21767	0;0;29835;29953;29971;29971;29971
chr10	21130971	21163984	33014	*	9.27	8.96	9.53	-0.57	8.54e-09	1.76e-07	512	480.71	737.85	737.23	Promoter (<=1kb)	10	21124930	21143092	18163	2	17863	uc011xbd.1	0	ENSMUSG00000019982	Myb	myeloblastosis oncogene	uc011xbd.1;uc007eog.1;uc007eoh.1;uc007eoi.1;uc007eoj.1	17863;17863;17863;17863;17863	0;0;0;0;0
chr14	55761158	55775877	14720	*	7.92	7.4	8.3	-0.9	8.92e-09	1.84e-07	160	178.04	332.92	295.98	Promoter (<=1kb)	14	55765962	55768492	2531	1	16995	uc007uar.2	0	ENSMUSG00000046908	Ltb4r1	leukotriene B4 receptor 1	uc007uat.1;uc007uau.1;uc007uap.3;uc007uar.2;uc007uaq.1	104110;104110;12684;16995;57260	0;0;-2734;0;0
chr9	45127662	45153970	26309	*	8.67	8.27	8.98	-0.71	8.96e-09	1.85e-07	296	319.59	538.43	472	Promoter (<=1kb)	9	45107176	45135606	28431	2	100038468	uc012gsb.1	0	ENSMUSG00000074385	Gm10684	predicted gene 10684	uc012gsb.1;uc009pff.1;uc009pfh.1;uc009pfg.1	100038468;100038468;399548;72821	0;0;0;0
chr17	8338110	8346175	8066	*	7.36	6.71	7.8	-1.09	8.99e-09	1.85e-07	95	114.84	234.87	210.98	Promoter (<=1kb)	17	8340406	8344113	3708	1	320111	uc008ajo.1	0	ENSMUSG00000055945	Prr18	proline rich 18	uc008ajo.1;uc012ajr.1	320111;320111	0;0
chr11	70224446	70232135	7690	*	7.46	6.85	7.88	-1.03	9.14e-09	1.88e-07	114	117.51	247.61	223.64	Promoter (<=1kb)	11	70224127	70229798	5672	2	12029	uc007juc.2	0	ENSMUSG00000000317	Bcl6b	B cell CLL/lymphoma 6, member B	uc033fxl.1;uc007jud.2;uc007jue.2;uc007jug.2;uc007juh.2;uc011xxr.1;uc011xxs.1;uc007juf.2;uc007juc.2;uc011xxq.1;uc007jub.1;uc011xxp.1	102465891;104457;104457;104457;104457;104457;104457;104457;12029;387190;69309;751537	2681;6335;6335;6335;6335;6335;6335;7695;0;-2907;0;-2582
chr8	123405667	123423530	17864	*	8.73	8.34	9.03	-0.7	9.41e-09	1.93e-07	300	347.18	541.76	506.96	Promoter (<=1kb)	8	123407082	123410744	3663	1	17199	uc009nvs.2	0	ENSMUSG00000074037	Mc1r	melanocortin 1 receptor	uc009nvs.2;uc009nvt.1;uc009nvl.2;uc012gmr.2;uc009nvm.2;uc009nvn.2;uc009nvo.2;uc009nvp.2;uc009nvr.2;uc029wws.1	17199;22152;66855;66855;66855;66855;66855;66855;66855;66855	0;0;0;0;0;0;0;0;7854;6402
chr10	19835257	19858516	23260	*	8.79	8.43	9.08	-0.65	9.51e-09	1.94e-07	342	348.96	536.77	547.35	Promoter (<=1kb)	10	19847917	19851459	3543	2	76157	uc007enk.1	0	ENSMUSG00000050473	Slc35d3	solute carrier family 35, member D3	uc007enl.2;uc011xay.1;uc007enk.1	18634;18634;76157	49158;49158;0
chr16	20586496	20598766	12271	*	7.93	7.44	8.3	-0.86	9.51e-09	1.94e-07	172	175.37	320.73	309.84	Promoter (<=1kb)	16	20589582	20598467	8886	1	328643	uc007yqb.1	0	ENSMUSG00000046613	Vwa5b2	von Willebrand factor A domain containing 5B2	uc007yqb.1;uc012acu.1;uc012acv.1	328643;328643;328643	0;0;0
chr11	31364185	31376458	12274	*	7.97	7.48	8.33	-0.85	9.52e-09	1.94e-07	181	175.37	332.92	311.65	Promoter (<=1kb)	11	31359441	31369103	9663	2	20856	uc007iij.1	0	ENSMUSG00000020303	Stc2	stanniocalcin 2	uc007iij.1;uc007iik.1	20856;20856	0;0
chr7	79050690	79056121	5432	*	7.02	6.3	7.5	-1.2	9.91e-09	2.02e-07	73	84.57	187.79	174.81	Promoter (<=1kb)	7	79018053	79053323	35271	2	102633600	uc057cah.1	0	ENSMUSG00000097441	Gm26633	predicted gene, 26633	uc057cah.1;uc009hxw.1	102633600;11595	0;0
chr3	96388484	96413992	25509	*	8.95	8.58	9.24	-0.66	1.02e-08	2.07e-07	363	404.15	638.7	572.06	Promoter (<=1kb)	3	96414437	96414833	397	2	21748	uc008qmy.1	841	ENSMUSG00000064796	Terc	telomerase RNA component	uc008qmx.1;uc008qmy.1	102632400;21748	11451;841
chr12	99959325	99974560	15236	*	8.15	7.7	8.5	-0.8	1.03e-08	2.09e-07	204	210.98	368.37	353.85	Promoter (<=1kb)	12	99964499	100062682	98184	1	217826	uc007osi.2	0	ENSMUSG00000045404	Kcnk13	potassium channel, subfamily K, member 13	uc007osg.3;uc007osi.2;uc007osj.2;uc007osl.2	104884;217826;217826;217826	74810;0;0;0
chr15	102679047	102700374	21328	*	8.48	8.08	8.8	-0.72	1.08e-08	2.19e-07	260	280.42	456.45	435.23	Distal Intergenic	15	102671792	102671866	75	2	751542	uc012aad.1	-7181	ENSMUSG00000076009	Mir688	microRNA 688	NA	NA	NA
chr18	37465821	37532849	67029	*	10.47	10.26	10.65	-0.39	1.09e-08	2.21e-07	1235	1210.68	1621.95	1592.01	Promoter (<=1kb)	18	37473546	37476340	2795	1	93886	uc008eqa.1	0	ENSMUSG00000047033	Pcdhb15	protocadherin beta 15	uc008eoy.3;uc056zgg.2;uc056zgh.2;uc008eqa.1;uc008eqb.2;uc008eqc.1;uc008eqd.1;uc008eqe.1;uc008eqf.3;uc012bby.2	100384868;103611158;103611159;93886;93887;93888;93889;93890;93891;93893	0;0;0;0;0;0;0;0;0;0
chr18	46187588	46218384	30797	*	9.19	8.87	9.46	-0.59	1.12e-08	2.26e-07	491	441.54	716.25	689.61	Promoter (<=1kb)	18	46165300	46198818	33519	2	28105	uc012bcp.1	0	ENSMUSG00000033949	Trim36	tripartite motif-containing 36	uc012bcp.1;uc008evi.2	28105;28105	0;0
chr5	28198973	28213616	14644	*	8.14	7.67	8.5	-0.83	1.12e-08	2.27e-07	200	206.53	386.1	335.76	Promoter (<=1kb)	5	28200819	28210168	9350	2	269637	uc057btn.1	0	ENSMUSG00000044681	Cnpy1	canopy FGF signaling regulator 1	uc057btn.1;uc008wtw.2;uc057bto.2	269637;269637;269637	0;0;0
chr6	127759666	127771639	11974	*	7.69	7.14	8.08	-0.94	1.16e-08	2.33e-07	136	146.88	282.51	260.41	Promoter (<=1kb)	6	127689009	127769159	80151	2	381813	uc009dwb.2	0	ENSMUSG00000030350	Prmt8	protein arginine N-methyltransferase 8	uc009dwc.2;uc009dwb.2	100504457;381813	7026;0
chr17	36201735	36253082	51348	*	9.94	9.69	10.16	-0.47	1.17e-08	2.36e-07	827	824.33	1174.92	1110.37	Exon (uc008ckp.1/uc008ckp.1, exon 1 of 4)	17	36255673	36257846	2174	2	67676	uc008ckq.1	4764	ENSMUSG00000024446	Rpp21	ribonuclease P 21 subunit	uc008ckq.1;uc008ckr.1	67676;67676	4764;4764
chr11	59171465	59178945	7481	*	7.08	6.39	7.55	-1.16	1.17e-08	2.36e-07	80	87.24	194.99	179.64	5' UTR	11	59175564	59182826	7263	2	118454	uc007jde.2	3881	ENSMUSG00000043448	Gjc2	gap junction protein, gamma 2	uc007jde.2;uc007jdf.2;uc011xvm.1;uc007jdg.2	118454;118454;14923;14923	0;0;8796;13007
chr13	56289346	56301499	12154	*	7.82	7.29	8.2	-0.91	1.19e-08	2.38e-07	143	170.03	291.37	297.79	Promoter (<=1kb)	13	56288643	56296551	7909	2	57266	uc007qsm.2	0	ENSMUSG00000021508	Cxcl14	chemokine (C-X-C motif) ligand 14	uc007qsm.2;uc011zab.2	57266;57266	0;0
chr18	67129593	67144006	14414	*	8.18	7.74	8.52	-0.79	1.22e-08	2.45e-07	209	217.21	372.8	362.29	Promoter (<=1kb)	18	67133560	67226792	93233	1	14680	uc008flt.3	0	ENSMUSG00000024524	Gnal	guanine nucleotide binding protein, alpha stimulating, olfactory type	uc008flr.2;uc008fls.3;uc008flt.3	14680;14680;14680	0;0;0
chr11	6063369	6069368	6000	*	6.84	6.08	7.34	-1.27	1.25e-08	2.51e-07	69	65.88	168.95	155.52	Promoter (<=1kb)	11	5969642	6065748	96107	2	12323	uc007hxr.3	0	ENSMUSG00000057897	Camk2b	calcium/calmodulin-dependent protein kinase II, beta	uc007hxr.3;uc007hxs.3;uc007hxt.3	12323;12323;12323	0;0;0
chr10	128926438	128939999	13562	*	8.11	7.63	8.47	-0.84	1.38e-08	2.75e-07	183	212.76	375.57	333.95	Promoter (<=1kb)	10	128933813	128958286	24474	1	16404	uc007hpa.2	0	ENSMUSG00000025348	Itga7	integrin alpha 7	uc007hoz.1;uc029rjw.1;uc007hpa.2;uc007hpb.2	14533;14533;16404;16404	-2914;-2914;0;0
chr4	130789721	130802067	12347	*	7.65	7.09	8.04	-0.95	1.4e-08	2.78e-07	130	143.32	272.54	254.99	Promoter (<=1kb)	4	130792537	130826318	33782	1	20970	uc008uzr.1	0	ENSMUSG00000025743	Sdc3	syndecan 3	uc008uzr.1	20970	0
chr10	94913849	94947305	33457	*	8.98	8.64	9.26	-0.62	1.44e-08	2.86e-07	390	406.83	639.25	587.74	Promoter (<=1kb)	10	94790866	94944578	153713	2	54712	uc007gvz.3	0	ENSMUSG00000074785	Plxnc1	plexin C1	uc007gvz.3	54712	0
chr4	129113420	129125652	12233	*	7.6	7.04	8.01	-0.97	1.45e-08	2.88e-07	122	141.54	261.46	253.18	Promoter (<=1kb)	4	129111570	129118967	7398	2	15444	uc008uwc.2	0	ENSMUSG00000028785	Hpca	hippocalcin	uc008uwc.2;uc033iet.1;uc008uwd.3;uc008uwb.3;uc033ieu.1;uc008uvz.2;uc008uwa.2;uc056zxf.1	15444;15444;15444;15444;15444;66260;66260;66260	0;0;0;0;0;7890;7890;7890
chr4	130270138	130287485	17348	*	8.17	7.71	8.51	-0.8	1.47e-08	2.92e-07	201	217.21	383.33	347.22	Promoter (<=1kb)	4	130253497	130275220	21724	2	230779	uc029uzq.1	0	ENSMUSG00000023232	Serinc2	serine incorporator 2	uc029uzq.1;uc008uzc.1	230779;230779	0;0
chr4	41486296	41526971	40676	*	9.37	9.05	9.63	-0.57	1.47e-08	2.92e-07	518	545.7	834.24	748.08	Promoter (<=1kb)	4	41495601	41503075	7475	2	329828	uc008sit.2	0	ENSMUSG00000046312	AI464131	expressed sequence AI464131	uc008sit.2;uc008siz.2;uc008sja.1;uc012dcc.2;uc008siu.1;uc008siv.1;uc029uqf.1;uc029uqg.1;uc008six.1;uc008siy.1;uc029uqh.2;uc029uqi.1;uc029uqj.1	329828;71901;71901;71901;73721;73721;73721;73721;73721;73721;73721;73721;76992	0;0;0;0;0;0;0;0;0;0;0;0;0
chr19	8983172	8992644	9473	*	7.14	6.46	7.6	-1.14	1.61e-08	3.18e-07	80	96.14	199.97	188.08	Promoter (<=1kb)	19	8989284	9019196	29913	1	66395	uc008goj.2	0	ENSMUSG00000069833	Ahnak	AHNAK nucleoprotein (desmoyokin)	uc008goj.2;uc008gok.2;uc008gol.2;uc012bii.2;uc008goi.1	66395;66395;66395;66395;67160	0;0;0;0;16131
chr14	29715460	29727972	12513	*	7.98	7.48	8.34	-0.86	1.7e-08	3.36e-07	187	170.03	347.32	302.61	Promoter (<=1kb)	14	28904943	29721864	816922	2	12294	uc057krw.1	0	ENSMUSG00000021991	Cacna2d3	calcium channel, voltage-dependent, alpha2/delta subunit 3	uc057krw.1	12294	0
chr5	110541817	110551225	9409	*	7.4	6.8	7.82	-1.01	1.72e-08	3.39e-07	111	112.17	222.69	227.86	Promoter (<=1kb)	5	110544355	110621383	77029	1	231605	uc008yqz.3	0	ENSMUSG00000033316	Galnt9	polypeptide N-acetylgalactosaminyltransferase 9	uc008yqz.3	231605	0
chrX	58013325	58020711	7387	*	6.73	5.93	7.25	-1.31	1.72e-08	3.39e-07	60	62.31	158.98	144.67	Distal Intergenic	20	58030628	58036630	6003	1	22773	uc009tho.1	-9917	ENSMUSG00000067860	Zic3	zinc finger protein of the cerebellum 3	NA	NA	NA
chr7	18950569	18965273	14705	*	8.05	7.56	8.41	-0.85	1.72e-08	3.39e-07	180	198.52	362.83	317.68	3' UTR	7	18925888	18965319	39432	1	384569	uc012fau.1	24681	ENSMUSG00000030411	Nova2	neuro-oncological ventral antigen 2	uc012fau.1	384569	0
chr1	135915478	135922497	7020	*	7.14	6.45	7.61	-1.16	1.77e-08	3.48e-07	82	92.58	213.82	176.62	Promoter (<=1kb)	1	135871394	135919207	47814	2	18772	uc007cub.2	0	ENSMUSG00000026413	Pkp1	plakophilin 1	uc007cub.2;uc011wss.2	18772;18772	0;0
chr18	35872082	35894358	22277	*	8.51	8.07	8.84	-0.77	1.79e-08	3.5e-07	306	231.45	470.85	448.49	Distal Intergenic	18	35854691	35861688	6998	1	67393	uc008emy.1	17391	ENSMUSG00000046668	Cxxc5	CXXC finger 5	NA	NA	NA
chr19	5435721	5459284	23564	*	8.67	8.3	8.96	-0.66	1.88e-08	3.67e-07	313	316.91	509.08	488.27	Promoter (<=1kb)	19	5447698	5455938	8241	1	14283	uc008gdc.1	0	ENSMUSG00000024912	Fosl1	fos-like antigen 1	uc008gdc.1;uc008gdd.3;uc012bgx.2;uc008gde.2;uc008gdf.2;uc008gdg.2;uc008gdh.2;uc008gdi.1;uc008gdj.1	14283;240514;240514;58249;58249;58249;58249;58249;58249	0;0;0;-1323;-1323;-1323;-1323;-3183;-3887
chr19	54043084	54049249	6166	*	6.94	6.2	7.43	-1.22	1.93e-08	3.78e-07	77	70.33	185.57	158.54	Promoter (<=1kb)	19	54045182	54048982	3801	1	11551	uc012bnl.1	0	ENSMUSG00000033717	Adra2a	adrenergic receptor, alpha 2a	uc012bnl.1	11551	0
chr4	124976206	124994646	18441	*	8.25	7.81	8.59	-0.78	1.95e-08	3.81e-07	227	221.66	412.13	359.88	Promoter (<=1kb)	4	124986430	125009099	22670	1	192199	uc008urn.1	0	ENSMUSG00000028871	Rspo1	R-spondin 1	uc008urn.1	192199	0
chr2	118732253	118757781	25529	*	8.55	8.16	8.86	-0.7	2.06e-08	4.02e-07	284	286.65	489.69	439.45	Promoter (<=1kb)	2	118745758	118748810	3053	1	100043272	uc012cbk.2	0	ENSMUSG00000074918	Inafm2	InaF motif containing 2	uc012cbk.2;uc008lsi.1;uc012cbj.1;uc008lsk.1;uc008lsn.1;uc012cbl.1	100043272;18796;18796;18796;214239;214239	0;0;0;0;0;0
chr12	17318208	17330462	12255	*	7.9	7.4	8.26	-0.87	2.14e-08	4.15e-07	168	169.14	325.72	289.35	Promoter (<=1kb)	12	17284721	17324730	40010	2	68775	uc007ncr.2	0	ENSMUSG00000020566	Atp6v1c2	ATPase, H+ transporting, lysosomal V1 subunit C2	uc007ncr.2;uc007ncs.2;uc007nct.2	68775;68775;68775	0;0;0
chr8	71412301	71466367	54067	*	10.21	9.98	10.41	-0.43	2.14e-08	4.15e-07	1025	997.03	1396.49	1321.35	Promoter (<=1kb)	8	71456700	71463657	6958	2	64296	uc009mdf.2	0	ENSMUSG00000007950	Abhd8	abhydrolase domain containing 8	uc009mdc.3;uc009mdd.3;uc009mdf.2;uc009mdg.2;uc009mdi.3;uc009mdk.3;uc057aly.1;uc057alz.2;uc057ama.1;uc009mdh.1	234396;234396;64296;64296;66498;66498;66498;66498;66498;94065	6289;6289;0;0;0;0;0;0;0;0
chr15	100726676	100734614	7939	*	7.19	6.53	7.64	-1.11	2.2e-08	4.27e-07	87	97.92	186.68	213.39	Promoter (<=1kb)	15	100689915	100729376	39462	2	207839	uc007xsa.2	0	ENSMUSG00000037280	Galnt6	polypeptide N-acetylgalactosaminyltransferase 6	uc007xsa.2;uc007xsb.2;uc007xsd.2;uc029svd.1	207839;207839;619313;619313	0;0;0;0
chr1	134231140	134242194	11055	*	7.55	6.99	7.96	-0.98	2.22e-08	4.29e-07	119	134.42	262.02	236.3	Promoter (<=1kb)	1	134199215	134234856	35642	2	11539	uc056yea.1	0	ENSMUSG00000042429	Adora1	adenosine A1 receptor	uc056yea.1;uc007crj.2;uc007crk.2;uc033fli.1;uc033flj.1	11539;11539;11539;11539;11539	0;0;0;0;0
chr8	78147240	78471790	324551	*	12.74	12.65	12.84	-0.19	2.27e-08	4.39e-07	6332	6479.83	7418.98	7224.64	Promoter (<=1kb)	8	78433009	78436652	3644	2	18997	uc009mhy.1	0	ENSMUSG00000031688	Pou4f2	POU domain, class 4, transcription factor 2	uc009mhy.1;uc009mhx.1	18997;73301	0;0
chr4	46986384	46998245	11862	*	7.65	7.1	8.05	-0.96	2.28e-08	4.4e-07	123	150.45	275.86	254.99	Promoter (<=1kb)	4	46663898	46991714	327817	2	242425	uc008sug.1	0	ENSMUSG00000039809	Gabbr2	gamma-aminobutyric acid (GABA) B receptor, 2	uc008sug.1	242425	0
chr11	52165194	52176795	11602	*	7.71	7.14	8.12	-0.98	2.33e-08	4.49e-07	137	144.21	311.87	243.53	Distal Intergenic	11	52154876	52157907	3032	2	257871	uc011xuo.1	-7287	NA	Olfr1372-ps1	olfactory receptor 1372, pseudogene 1	NA	NA	NA
chr12	112869877	112887228	17352	*	8.27	7.83	8.6	-0.77	2.35e-08	4.52e-07	220	235.02	409.92	366.51	Distal Intergenic	12	112850876	112860916	10041	2	56696	uc007pfk.1	-8961	ENSMUSG00000021298	Gpr132	G protein-coupled receptor 132	NA	NA	NA
chr10	79970150	79979142	8993	*	7.1	6.39	7.57	-1.18	2.36e-08	4.53e-07	72	96.14	201.08	179.64	Promoter (<=1kb)	10	79970724	79977190	6467	1	170483	uc007gau.1	0	ENSMUSG00000035745	Grin3b	glutamate receptor, ionotropic, NMDA3B	uc007gau.1;uc007gav.1;uc011xij.1;uc007gat.1;uc007gaw.1;uc011xik.1;uc007gax.1;uc007gay.1	170483;170483;170483;216156;216157;216157;216157;216157	0;0;0;9998;0;0;0;0
chr19	56713962	56732616	18655	*	8.52	8.11	8.84	-0.74	2.44e-08	4.69e-07	272	279.53	498	420.16	Promoter (<=1kb)	19	56722372	56724862	2491	1	11554	uc008hze.2	0	ENSMUSG00000035283	Adrb1	adrenergic receptor, beta 1	uc008hze.2	11554	0
chr8	119674686	119760203	85518	*	10.48	10.26	10.67	-0.41	2.51e-08	4.8e-07	1190	1264.99	1683.99	1569.71	Promoter (<=1kb)	8	119700009	119757718	57710	1	69047	uc009nqg.1	0	ENSMUSG00000034112	Atp2c2	ATPase, Ca++ transporting, type 2C, member 2	uc009nqd.1;uc009nqe.1;uc009nqf.1;uc009nqg.1;uc009nqh.1	67866;67866;67866;69047;74347	0;0;0;0;18213
chr4	134369393	134373897	4505	*	6.57	5.7	7.11	-1.4	2.55e-08	4.88e-07	47	56.97	145.13	130.21	Promoter (<=1kb)	4	134356373	134372547	16175	2	56219	uc008vex.2	0	ENSMUSG00000028838	Extl1	exostoses (multiple)-like 1	uc008vex.2;uc012dmu.1	56219;56219	0;0
chr9	95635927	95640461	4535	*	6.97	6.22	7.46	-1.24	2.61e-08	4.99e-07	76	73	197.76	153.72	Promoter (<=1kb)	9	95637628	95695551	57924	1	76477	uc009rbg.1	0	ENSMUSG00000015354	Pcolce2	procollagen C-endopeptidase enhancer 2	uc009rbg.1	76477	0
chr4	101283149	101296951	13803	*	8	7.53	8.36	-0.82	2.68e-08	5.1e-07	197	173.59	323.5	332.15	Distal Intergenic	4	101151974	101265282	113309	2	16451	uc008tvk.1	-17867	ENSMUSG00000028530	Jak1	Janus kinase 1	NA	NA	NA
chr2	32082162	32092338	10177	*	7.52	6.96	7.92	-0.96	2.68e-08	5.1e-07	121	127.3	249.83	234.49	Promoter (<=1kb)	2	32050055	32084669	34615	2	241303	uc008jej.1	0	ENSMUSG00000050592	Fam78a	family with sequence similarity 78, member A	uc008jel.1;uc012btq.1;uc008jej.1;uc008jek.1	227721;227721;241303;241303	-3313;-3313;0;0
chr18	53450556	53485256	34701	*	9.46	9.17	9.7	-0.53	2.77e-08	5.27e-07	581	569.73	864.71	798.72	Promoter (<=1kb)	18	53464546	53575857	111312	1	225518	uc008exv.1	0	ENSMUSG00000069378	Prdm6	PR domain containing 6	uc008exv.1	225518	0
chr3	83116297	83133794	17498	*	8.48	8.09	8.79	-0.7	2.78e-08	5.28e-07	280	266.17	456.45	429.8	Distal Intergenic	3	83055538	83072291	16754	1	53317	uc008ppj.1	60759	ENSMUSG00000027998	Plrg1	pleiotropic regulator 1	NA	NA	NA
chr15	102245753	102263938	18186	*	7.92	7.41	8.3	-0.9	2.81e-08	5.34e-07	153	186.05	341.23	291.16	Promoter (<=1kb)	15	102234938	102246500	11563	2	19411	uc007xvc.2	0	ENSMUSG00000001288	Rarg	retinoic acid receptor, gamma	uc007xvc.2;uc007xvd.2	19411;19411	0;0
chr5	33716270	33732994	16725	*	8.04	7.56	8.4	-0.83	2.86e-08	5.42e-07	196	181.6	361.17	312.25	Promoter (<=1kb)	5	33721724	33737068	15345	1	14184	uc008xbe.3	0	ENSMUSG00000054252	Fgfr3	fibroblast growth factor receptor 3	uc008xbe.3;uc008xbf.3;uc008xbg.3;uc008xbh.3;uc012dut.2	14184;14184;14184;14184;14184	0;0;0;0;0
chr4	153479438	153488904	9467	*	7.1	6.42	7.56	-1.14	3.26e-08	6.17e-07	90	81.01	204.96	172.4	Promoter (<=1kb)	4	153373221	153482830	109610	2	230959	uc008was.1	0	ENSMUSG00000039546	Ajap1	adherens junction associated protein 1	uc008was.1	230959	0
chr19	10454483	10463134	8652	*	7.33	6.7	7.77	-1.06	3.32e-08	6.26e-07	98	110.39	238.2	197.72	Promoter (<=1kb)	19	10455371	10457447	2077	2	278795	uc012bio.2	0	ENSMUSG00000090291	Lrrc10b	leucine rich repeat containing 10B	uc012bio.2;uc008gpp.2;uc008gpq.2;uc012bin.1	278795;54525;54525;54525	0;0;0;0
chr11	118904872	118912398	7527	*	7.06	6.37	7.52	-1.14	3.32e-08	6.26e-07	76	89.91	189.45	177.23	Promoter (<=1kb)	11	118489760	118909572	419813	2	52897	uc007mpl.1	0	ENSMUSG00000025576	Rbfox3	RNA binding protein, fox-1 homolog (C. elegans) 3	uc007mpl.1;uc007mpm.1;uc007mpn.1;uc007mpo.1;uc007mpp.1	52897;52897;52897;52897;52897	0;0;0;0;0
chr1	191180111	191216851	36741	*	9.36	9.06	9.61	-0.55	3.33e-08	6.26e-07	521	549.26	814.3	750.49	Promoter (<=1kb)	1	191170296	191183333	13038	2	11910	uc007ece.2	0	ENSMUSG00000026628	Atf3	activating transcription factor 3	uc007ece.2;uc011wys.2;uc011wyt.2	11910;11910;11910	0;0;0
chr15	55304435	55310050	5616	*	7.17	6.51	7.62	-1.11	3.35e-08	6.31e-07	96	86.35	211.05	181.44	Promoter (<=1kb)	15	55307750	55520803	213054	1	12818	uc007vsc.2	0	ENSMUSG00000022371	Col14a1	collagen, type XIV, alpha 1	uc007vsc.2;uc007vsd.2	12818;12818	0;0
chr12	86975630	86993821	18192	*	8.2	7.76	8.54	-0.78	3.44e-08	6.47e-07	201	233.23	381.67	362.89	Promoter (<=1kb)	12	86983381	86988676	5296	2	238331	uc007oie.1	0	ENSMUSG00000048483	Zdhhc22	zinc finger, DHHC-type containing 22	uc007oie.1	238331	0
chr7	110621780	110633748	11969	*	7.88	7.37	8.25	-0.88	3.47e-08	6.51e-07	182	148.66	321.84	288.14	Promoter (<=1kb)	7	110627669	110629819	2151	1	11535	uc009jfj.1	0	ENSMUSG00000030790	Adm	adrenomedullin	uc009jfj.1	11535	0
chr14	24000959	24013888	12930	*	7.81	7.3	8.18	-0.88	3.56e-08	6.66e-07	150	165.58	304.67	276.09	Promoter (<=1kb)	14	23298694	24004205	705512	2	16531	uc007sme.3	0	ENSMUSG00000063142	Kcnma1	potassium large conductance calcium-activated channel, subfamily M, alpha member 1	uc007sme.3;uc007smg.2;uc007smh.2;uc007smi.2;uc011zgw.2;uc011zgx.2;uc011zgy.2;uc011zgz.2;uc011zha.2;uc011zhc.2;uc011zhd.2;uc011zhe.2;uc057krj.1;uc057krk.1;uc057krl.1;uc057krm.1;uc057krn.1;uc057kro.1;uc011zhf.2;uc011zhg.2;uc011zhh.2;uc011zhi.2;uc011zhj.2;uc007smk.1;uc056yvw.1	16531;16531;16531;16531;16531;16531;16531;16531;16531;16531;16531;16531;16531;16531;16531;16531;16531;16531;16531;16531;16531;16531;16531;16531;78019	0;0;0;0;0;0;0;0;0;0;0;0;0;0;0;0;0;0;0;0;0;0;0;0;0
chr17	46286092	46301288	15197	*	8.11	7.65	8.46	-0.82	3.63e-08	6.79e-07	194	206.53	381.67	324.31	Promoter (<=1kb)	17	46297483	46303271	5789	1	106565	uc008csl.2	0	ENSMUSG00000047428	Dlk2	delta like non-canonical Notch ligand 2	uc008csl.2;uc008csm.2;uc008csn.1;uc008cso.1;uc012auq.1;uc008csf.2;uc008csg.2;uc008csh.2;uc029tic.1;uc008csj.2	106565;106565;224814;224814;224814;74094;74094;74094;74094;74094	0;0;24478;26735;26735;-3066;-3066;-3066;-3066;-3653
chr16	30300683	30313880	13198	*	8.08	7.62	8.42	-0.8	3.64e-08	6.79e-07	193	200.3	360.62	324.91	Promoter (<=1kb)	16	30307685	30310781	3097	2	14729	uc007ywo.2	0	ENSMUSG00000047953	Gp5	glycoprotein 5 (platelet)	uc007ywo.2;uc012aee.2;uc012aef.2	14729;224088;224088	0;0;0
chr9	78426669	78446838	20170	*	8.47	8.06	8.79	-0.74	3.7e-08	6.9e-07	255	277.75	479.16	408.7	Promoter (<=1kb)	9	78430518	78443237	12720	2	214763	uc009quj.2	0	ENSMUSG00000032344	Cgas	cyclic GMP-AMP synthase	uc012gxe.1;uc009quj.2;uc009quk.2;uc009qul.2;uc009qum.2	100048658;214763;214763;68291;68291	0;0;0;-1372;-1372
chr8	126231323	126412782	181460	*	11.7	11.55	11.83	-0.28	3.72e-08	6.92e-07	2895	3121.96	3720.85	3583.69	Promoter (<=1kb)	8	126298579	126395978	97400	1	210027	uc009nyt.2	0	ENSMUSG00000057060	Slc35f3	solute carrier family 35, member F3	uc009nys.2;uc009nyt.2	210027;210027	0;0
chr6	145858262	145872838	14577	*	8.13	7.68	8.48	-0.8	3.72e-08	6.92e-07	211	199.41	380.01	332.75	Promoter (<=1kb)	6	145858243	145865420	7178	2	79362	uc009ert.2	0	ENSMUSG00000030256	Bhlhe41	basic helix-loop-helix family, member e41	uc009ert.2;uc033ivw.1	79362;79362	0;0
chr7	19413206	19425226	12021	*	7.62	7.08	8.01	-0.93	3.77e-08	6.99e-07	137	133.53	272.54	242.93	Promoter (<=1kb)	7	19417466	19421417	3952	2	100503495	uc009flv.1	0	ENSMUSG00000040705	A930016O22Rik	RIKEN cDNA A930016O22 gene	uc009flv.1;uc033iwz.1;uc009flu.1;uc009flw.1;uc009flx.1;uc009fly.1;uc012fbe.1	100503495;100503495;12715;232944;232944;232944;232944	0;0;0;3075;26530;33268;33268
chr14	21968646	22002941	34296	*	9.09	8.76	9.36	-0.6	3.83e-08	7.09e-07	441	424.63	692.98	617.27	Promoter (<=1kb)	14	21983962	21989601	5640	2	218820	uc007slv.1	0	ENSMUSG00000039081	Zfp503	zinc finger protein 503	uc007slv.1	218820	0
chr12	5361820	5383765	21946	*	8.6	8.22	8.89	-0.68	3.83e-08	7.09e-07	294	301.78	497.44	453.91	Promoter (<=1kb)	12	5077465	5375682	298218	2	208439	uc007myw.4	0	ENSMUSG00000020627	Klhl29	kelch-like 29	uc007myw.4;uc011yka.2	208439;72669	0;0
chr12	98568156	98579265	11110	*	7.89	7.4	8.25	-0.85	3.86e-08	7.13e-07	161	177.15	317.41	292.36	Promoter (<=1kb)	12	98429437	98574712	145276	2	72258	uc007oqg.2	0	ENSMUSG00000033854	Kcnk10	potassium channel, subfamily K, member 10	uc007oqg.2;uc007oqh.2;uc007oqi.2;uc057bck.1	72258;72258;72258;72258	0;0;0;0
chr9	65388854	65405516	16663	*	8.12	7.67	8.46	-0.79	3.93e-08	7.25e-07	211	195.85	335.69	366.51	Promoter (<=1kb)	9	65398488	65412708	14221	1	70784	uc009qdf.3	0	ENSMUSG00000041696	Rasl12	RAS-like, family 12	uc009qdf.3;uc012gvk.2;uc012gvl.1;uc009qde.2	70784;70784;70784;74492	0;0;0;0
chr11	117393171	117417499	24329	*	8.69	8.3	9	-0.7	3.93e-08	7.25e-07	282	348.07	536.22	490.08	Promoter (<=1kb)	11	117414389	117415368	980	1	105827746	uc057bau.1	0	ENSMUSG00000086588	Gm11729	predicted gene 11729	uc057bau.1;uc057kna.1	105827746;667423	0;4218
chr14	57097529	57108712	11184	*	7.65	7.12	8.04	-0.92	4.32e-08	7.95e-07	144	133.53	279.19	246.55	Promoter (<=1kb)	14	57098602	57104702	6101	2	14619	uc007ucx.2	0	ENSMUSG00000046352	Gjb2	gap junction protein, beta 2	uc007ucx.2	14619	0
chr3	107512608	107535682	23075	*	8.53	8.16	8.83	-0.67	4.58e-08	8.42e-07	281	289.32	459.22	449.09	Promoter (<=1kb)	3	107467548	107518018	50471	2	229706	uc008qxb.1	0	ENSMUSG00000027894	Slc6a17	solute carrier family 6 (neurotransmitter transporter), member 17	uc008qxb.1;uc008qxc.1;uc008qxd.1	229706;229706;229706	0;0;0
chr8	120377807	120428832	51026	*	9.57	9.3	9.8	-0.51	4.64e-08	8.51e-07	622	635.61	927.3	859	Distal Intergenic	8	120488866	120581383	92518	1	382034	uc009nqz.2	-60034	ENSMUSG00000031822	Gse1	genetic suppressor element 1, coiled-coil protein	NA	NA	NA
chr11	107790144	107801775	11632	*	7.54	6.97	7.94	-0.97	4.69e-08	8.59e-07	117	133.53	263.68	227.86	Promoter (<=1kb)	11	107734780	107794464	59685	2	54377	uc007maz.1	0	ENSMUSG00000020723	Cacng4	calcium channel, voltage-dependent, gamma subunit 4	uc007maz.1	54377	0
chr2	173267979	173280673	12695	*	7.54	6.97	7.95	-0.98	4.74e-08	8.68e-07	117	133.53	269.77	225.45	Promoter (<=1kb)	2	173224465	173276533	52069	2	65112	uc008odq.1	0	ENSMUSG00000038400	Pmepa1	prostate transmembrane protein, androgen induced 1	uc008odq.1	65112	0
chr8	87941519	87996507	54989	*	9.95	9.71	10.16	-0.46	4.75e-08	8.68e-07	806	864.39	1172.15	1117.6	Promoter (<=1kb)	8	87661810	87959595	297786	2	94187	uc009mqv.1	0	ENSMUSG00000045333	Zfp423	zinc finger protein 423	uc009mqv.1	94187	0
chr10	127176182	127185588	9407	*	7.27	6.62	7.71	-1.08	4.77e-08	8.7e-07	85	112.17	219.92	198.32	Promoter (<=1kb)	10	127172426	127180645	8220	2	216441	uc033fsy.1	0	ENSMUSG00000040441	Slc26a10	solute carrier family 26, member 10	uc007hic.2;uc007hid.2;uc007hig.3;uc033fsy.1;uc007hij.2;uc007hik.2;uc011xpm.1;uc007hil.1	14421;14421;14421;216441;52666;52666;52666;80904	0;0;0;0;0;0;4466;10121
chr16	31928182	31937379	9198	*	7.66	7.14	8.04	-0.89	4.78e-08	8.71e-07	145	137.98	264.23	261.62	Promoter (<=1kb)	16	31933851	31942622	8772	1	239827	uc007yxw.2	0	ENSMUSG00000045625	Pigz	phosphatidylinositol glycan anchor biosynthesis, class Z	uc007yxw.2;uc007yxx.2	239827;239827	0;0
chr4	154169318	154175523	6206	*	6.79	6.05	7.28	-1.23	5.25e-08	9.55e-07	66	66.77	160.09	150.7	Promoter (<=1kb)	4	154170713	154275721	105009	1	230971	uc008wbp.2	0	ENSMUSG00000057751	Megf6	multiple EGF-like-domains 6	uc008wbp.2;uc008wbj.1;uc008wbk.1	230971;59002;59002	0;0;14107
chr16	11980009	11992184	12176	*	7.78	7.28	8.15	-0.87	5.34e-08	9.7e-07	165	145.99	290.27	276.69	Promoter (<=1kb)	16	11984113	11995390	11278	1	72555	uc007yfr.1	0	ENSMUSG00000022494	Shisa9	shisa family member 9	uc007yfr.1;uc007yfs.2;uc007yft.2	72555;72555;72555	0;0;0
chr11	76659309	76678677	19369	*	8.32	7.91	8.64	-0.73	5.44e-08	9.87e-07	237	244.81	414.9	381.58	Promoter (<=1kb)	11	76672470	76673676	1207	1	320522	uc007kfx.1	0	ENSMUSG00000044243	Bhlha9	basic helix-loop-helix family, member a9	uc007kfy.2;uc007kfx.1	237858;320522	-1196;0
chr1	163295650	163331018	35369	*	9.3	8.99	9.55	-0.56	5.47e-08	9.91e-07	499	518.1	794.91	706.49	Promoter (<=1kb)	1	163245119	163313650	68532	2	18933	uc007dhh.1	0	ENSMUSG00000026586	Prrx1	paired related homeobox 1	uc007dhh.1;uc007dhi.1;uc007dhk.1	18933;18933;18933	0;0;0
chr5	101760702	101771214	10513	*	7.66	7.1	8.06	-0.96	5.53e-08	1e-06	148	126.41	296.91	238.11	Promoter (<=1kb)	5	101765130	101823852	58723	1	74596	uc008yio.1	0	ENSMUSG00000029330	Cds1	CDP-diacylglycerol synthase 1	uc008yio.1	74596	0
chr2	90872764	90891088	18325	*	8.35	7.93	8.67	-0.74	5.55e-08	1e-06	253	235.02	432.63	380.37	Promoter (<=1kb)	2	90885786	90890526	4741	1	67445	uc008ktq.1	0	ENSMUSG00000040794	C1qtnf4	C1q and tumor necrosis factor related protein 4	uc008ktq.1;uc008ktr.1	67445;68349	0;13633
chr9	54760916	54770343	9428	*	7.51	6.96	7.9	-0.94	5.62e-08	1.01e-06	126	123.74	243.74	234.49	Promoter (<=1kb)	9	54764748	54773110	8363	1	12903	uc009prp.2	0	ENSMUSG00000032291	Crabp1	cellular retinoic acid binding protein I	uc009prp.2;uc033jkr.1	12903;12903	0;0
chr2	37781301	37796526	15226	*	7.89	7.37	8.27	-0.89	5.69e-08	1.03e-06	179	152.23	339.01	276.69	Exon (uc008jnf.2/241324, exon 2 of 13)	2	37776249	37799103	22855	1	241324	uc008jnf.2	5052	ENSMUSG00000035403	Crb2	crumbs family member 2	uc008jng.2;uc008jnh.2;uc008jni.2;uc008jnf.2	227801;227801;227801;241324	0;0;0;0
chr6	115990595	115996159	5565	*	6.75	6	7.24	-1.24	5.76e-08	1.04e-06	66	62.31	152.89	150.1	Promoter (<=1kb)	6	115954811	115995005	40195	2	67784	uc009djn.1	0	ENSMUSG00000030123	Plxnd1	plexin D1	uc009djn.1	67784	0
chr9	58813463	58834719	21257	*	8.28	7.87	8.6	-0.73	5.79e-08	1.04e-06	230	237.69	395.52	377.96	Promoter (<=1kb)	9	58823512	58860955	37444	1	330953	uc009pxi.1	0	ENSMUSG00000032338	Hcn4	hyperpolarization-activated, cyclic nucleotide-gated K+ 4	uc009pxi.1	330953	0
chr2	84832683	84844378	11696	*	7.72	7.22	8.09	-0.87	5.84e-08	1.05e-06	149	149.56	279.74	266.44	Promoter (<=1kb)	2	84839408	84862388	22981	1	72401	uc008kji.1	0	ENSMUSG00000027075	Slc43a1	solute carrier family 43, member 1	uc008kjh.2;uc008kji.1;uc008kjj.1;uc008kjk.1;uc008kjl.1	30059;72401;72401;72401;72401	5662;0;0;0;0
chr2	25176927	25189384	12458	*	7.72	7.22	8.1	-0.87	6e-08	1.08e-06	143	155.79	271.99	275.48	Promoter (<=1kb)	2	25180758	25183339	2582	1	67122	uc008iqk.2	0	ENSMUSG00000078202	Nrarp	Notch-regulated ankyrin repeat protein	uc008iql.2;uc008iqk.2	227612;67122	7429;0
chr19	44826573	44846252	19680	*	8.33	7.92	8.65	-0.73	6.1e-08	1.09e-06	233	252.82	422.66	382.78	Promoter (<=1kb)	19	44828493	44835938	7446	2	73322	uc029tsl.1	0	ENSMUSG00000092369	1700039E22Rik	RIKEN cDNA 1700039E22 gene	uc008hqa.3;uc029tsl.1	18504;73322	0;0
chr4	139062843	139078305	15463	*	7.99	7.54	8.33	-0.79	6.25e-08	1.12e-06	184	186.94	323.5	319.49	Promoter (<=1kb)	4	139061409	139074789	13381	2	15565	uc008vlr.1	0	ENSMUSG00000028747	Htr6	5-hydroxytryptamine (serotonin) receptor 6	uc008vlr.1;uc008vls.1;uc056zyc.1;uc008vlp.2	15565;17965;77056;77056	0;0;90560;89938
chr1	5014151	5025868	11718	*	7.96	7.46	8.34	-0.88	6.31e-08	1.13e-06	186	166.47	359.51	286.94	Promoter (<=1kb)	1	4909576	5018734	109159	2	58175	uc056ycb.1	0	ENSMUSG00000002459	Rgs20	regulator of G-protein signaling 20	uc056ycb.1;uc007afk.3;uc007afl.2	58175;58175;58175	0;0;0
chr13	94582899	94627669	44771	*	9.48	9.19	9.71	-0.52	6.35e-08	1.13e-06	593	578.64	871.91	803.54	Distal Intergenic	13	94788943	94842899	53957	1	21371	uc007rlx.1	-161274	ENSMUSG00000042043	Tbca	tubulin cofactor A	NA	NA	NA
chr8	124135158	124252705	117548	*	11.12	10.95	11.26	-0.31	6.4e-08	1.14e-06	1946	2017.21	2500.51	2413.64	Promoter (<=1kb)	8	124231394	124345722	114329	1	108148	uc009nwz.3	0	ENSMUSG00000089704	Galnt2	polypeptide N-acetylgalactosaminyltransferase 2	uc009nwz.3	108148	0
chr9	107370718	107390688	19971	*	8.35	7.94	8.66	-0.72	6.57e-08	1.17e-06	265	227	403.27	408.1	Distal Intergenic	9	107399880	107513332	113453	1	56808	uc012hae.1	-9192	ENSMUSG00000010066	Cacna2d2	calcium channel, voltage-dependent, alpha 2/delta subunit 2	NA	NA	NA
chr7	82320232	82345679	25448	*	8.63	8.26	8.92	-0.66	6.57e-08	1.17e-06	289	324.93	495.78	474.41	Promoter (<=1kb)	7	82335694	82614448	278755	1	269959	uc009ida.2	0	ENSMUSG00000070469	Adamtsl3	ADAMTS-like 3	uc009ida.2	269959	0
chr2	25390156	25404365	14210	*	7.94	7.47	8.3	-0.83	6.71e-08	1.19e-06	175	178.93	336.24	292.96	Promoter (<=1kb)	2	25395874	25401323	5450	1	12496	uc008irw.2	0	ENSMUSG00000015085	Entpd2	ectonucleoside triphosphate diphosphohydrolase 2	uc008irw.2;uc008irx.2;uc008iry.1	12496;18146;18146	0;0;-2661
chr2	167187206	167191627	4422	*	6.25	5.26	6.83	-1.57	6.79e-08	1.2e-06	33	43.62	120.21	106.7	Promoter (<=1kb)	2	167095969	167188818	92850	2	16500	uc008nzh.2	0	ENSMUSG00000050556	Kcnb1	potassium voltage gated channel, Shab-related subfamily, member 1	uc008nzh.2;uc008nzi.2	16500;16500	0;0
chr2	164946274	164960563	14290	*	7.94	7.43	8.32	-0.89	6.84e-08	1.21e-06	169	176.26	358.4	279.7	Promoter (<=1kb)	2	164948219	164955850	7632	1	17395	uc008nwt.3	0	ENSMUSG00000017737	Mmp9	matrix metallopeptidase 9	uc008nwt.3;uc012cjf.2;uc056zqu.1	17395;57138;57138	0;0;0
chr9	32511401	32547208	35808	*	9.14	8.81	9.41	-0.59	6.98e-08	1.23e-06	443	457.57	729.54	629.93	Promoter (<=1kb)	9	32422204	32541452	119249	2	14247	uc009orz.2	0	ENSMUSG00000016087	Fli1	Friend leukemia integration 1	uc009orz.2	14247	0
chr3	121257740	121278935	21196	*	8.63	8.27	8.91	-0.65	7.01e-08	1.24e-06	316	300.89	494.12	470.79	Promoter (<=1kb)	3	121202008	121262889	60882	2	99887	uc008rdv.2	0	ENSMUSG00000028132	Tmem56	transmembrane protein 56	uc008rdt.1;uc008rdu.2;uc008rdv.2;uc008rdw.2	99887;99887;99887;99887	0;0;0;0
chr10	44524780	44537712	12933	*	7.92	7.45	8.28	-0.83	7.21e-08	1.27e-06	184	164.69	293.59	326.72	Promoter (<=1kb)	10	44446717	44528501	81785	2	12142	uc007ezw.1	0	ENSMUSG00000038151	Prdm1	PR domain containing 1, with ZNF domain	uc007ezw.1	12142	0
chr2	152067715	152085393	17679	*	8.21	7.78	8.54	-0.75	7.36e-08	1.29e-06	204	236.8	371.14	371.93	Promoter (<=1kb)	2	152081529	152095802	14274	1	545474	uc012cgb.1	0	ENSMUSG00000060257	Scrt2	scratch family zinc finger 2	uc012cgb.1	545474	0
chr10	22149916	22163585	13670	*	8.73	8.38	9.01	-0.62	7.48e-08	1.31e-06	332	335.61	526.8	501.54	Promoter (<=1kb)	10	22158586	22374139	215554	1	19368	uc007epe.2	0	ENSMUSG00000078452	Raet1a	retinoic acid early transcript 1, alpha	uc007epe.2;uc029qwb.1;uc007epc.2;uc011xbj.2;uc007epd.2;uc011xbk.2;uc011xbl.2	19368;319887;319887;379043;379043;379043;667281	0;-646;-646;0;0;0;0
chr19	47010632	47023777	13146	*	8	7.55	8.34	-0.79	7.53e-08	1.32e-06	192	183.38	333.47	315.27	Promoter (<=1kb)	19	47014698	47024358	9661	1	226180	uc008huk.2	0	ENSMUSG00000034336	Ina	internexin neuronal intermediate filament protein, alpha	uc008huk.2;uc008hui.2	226180;76952	0;0
chr4	155651997	155655695	3699	*	6.41	5.52	6.95	-1.43	7.65e-08	1.34e-06	42	49.85	126.3	121.16	Promoter (<=1kb)	4	155650655	155653384	2730	2	26561	uc008wed.1	0	ENSMUSG00000029061	Mmp23	matrix metallopeptidase 23	uc008wea.1;uc008web.1;uc008wec.1;uc057llc.1;uc008wed.1;uc012dqs.1;uc008wee.2;uc012dqt.2;uc008wef.2;uc008weg.2;uc033ihe.1;uc012dqu.1	12537;12537;12537;12537;26561;26561;76580;76580;76580;76580;76580;76580	27128;27128;27114;26466;0;0;0;0;0;0;0;0
chr14	70174377	70179135	4759	*	6.79	6.04	7.28	-1.24	7.68e-08	1.34e-06	63	68.55	170.06	141.66	Promoter (<=1kb)	14	70164218	70176815	12598	2	213019	uc029slm.1	0	ENSMUSG00000022090	Pdlim2	PDZ and LIM domain 2	uc033grv.1;uc033grw.1;uc007unk.1;uc007unl.1;uc007unm.1;uc029slm.1;uc007uni.1;uc007unj.1	20410;20410;20410;20410;20410;213019;213019;213019	13111;25488;26887;28536;32854;0;0;0
chr17	34626209	34639943	13735	*	7.65	7.14	8.03	-0.89	7.7e-08	1.34e-06	149	133.53	267.56	255.59	Promoter (<=1kb)	17	34629686	34632260	2575	1	260297	uc008cdf.1	0	ENSMUSG00000015476	Prrt1	proline-rich transmembrane protein 1	uc008cdf.1;uc008cdd.2;uc008cde.2;uc056zeo.1;uc056zep.1;uc056zeq.1;uc008cdg.1	260297;54397;54397;54397;54397;54397;56299	0;0;0;0;0;0;-4940
chr9	34483824	34492349	8526	*	7.45	6.88	7.86	-0.98	7.75e-08	1.35e-06	120	114.84	252.04	211.59	Promoter (<=1kb)	9	34486126	34510605	24480	1	67703	uc009osf.1	0	ENSMUSG00000032036	Kirrel3	kirre like nephrin family adhesion molecule 3	uc009osf.1;uc009osg.1;uc009osh.2;uc009osi.2;uc009osj.2;uc012gqb.1	67703;67703;67703;67703;67703;67703	0;0;0;0;0;0
chr2	160906764	160915551	8788	*	7.35	6.78	7.76	-0.98	7.85e-08	1.37e-06	106	113.06	221.58	211.59	Promoter (<=1kb)	2	160906438	160912339	5902	2	280635	uc008nrk.2	0	ENSMUSG00000050700	Emilin3	elastin microfibril interfacer 3	uc008nrk.2;uc008nrl.2;uc008nrh.2;uc008nri.2;uc008nrj.2	280635;280635;64899;64899;64899	0;0;26094;18596;18596
chr12	80689523	80701225	11703	*	7.72	7.2	8.09	-0.89	7.85e-08	1.37e-06	152	142.43	294.14	252.58	Promoter (<=1kb)	12	80692601	80724216	31616	1	217682	uc007obf.2	0	ENSMUSG00000066438	Plekhd1	pleckstrin homology domain containing, family D (with coiled-coil domains) member 1	uc007obf.2;uc057kop.1	217682;68354	0;0
chr1	39191681	39198553	6873	*	7.28	6.68	7.7	-1.01	8.53e-08	1.48e-06	110	95.25	213.82	200.73	Promoter (<=1kb)	1	39194272	39363240	168969	1	18143	uc007atd.2	0	ENSMUSG00000026077	Npas2	neuronal PAS domain protein 2	uc033fiv.1;uc007atd.2	102466631;18143	-4689;0
chr8	34474437	34818248	343812	*	12.6	12.5	12.69	-0.19	8.55e-08	1.48e-06	5805	5781.02	6771.42	6489.21	Promoter (<=1kb)	8	34807610	34819894	12285	1	319520	uc009lks.1	0	ENSMUSG00000031530	Dusp4	dual specificity phosphatase 4	uc009lks.1;uc029wsg.1	319520;330734	0;0
chr8	26588340	26951572	363233	*	12.78	12.68	12.88	-0.2	8.56e-08	1.48e-06	6375	6738.88	7703.71	7386.79	Promoter (<=1kb)	8	26814595	26824423	9829	2	72316	uc029wrx.2	0	ENSMUSG00000100335	2310008N11Rik	RIKEN cDNA 2310008N11 gene	uc029wrx.2	72316	0
chr7	122284849	122294907	10059	*	7.46	6.92	7.86	-0.94	8.6e-08	1.49e-06	118	123.74	238.2	226.05	Promoter (<=1kb)	7	122289125	122634402	345278	1	18751	uc009jot.3	0	ENSMUSG00000052889	Prkcb	protein kinase C, beta	uc009jot.3;uc009jou.2	18751;18751	0;0
chr8	120591389	120648553	57165	*	10.03	9.79	10.24	-0.46	8.77e-08	1.52e-06	835	932.94	1255.79	1170.65	Promoter (<=1kb)	8	120608600	120634382	25783	2	68918	uc009nre.2	0	ENSMUSG00000043687	1190005I06Rik	RIKEN cDNA 1190005I06 gene	uc057ccr.1;uc009nrd.1;uc009nre.2	105734727;272551;68918	0;-2314;0
chr5	144543825	144550781	6957	*	7.21	6.6	7.64	-1.04	8.82e-08	1.52e-06	100	93.47	211.61	186.87	Promoter (<=1kb)	5	144545887	144557478	11592	1	53324	uc012egq.1	0	ENSMUSG00000059991	Nptx2	neuronal pentraxin 2	uc012egq.1	53324	0
chr12	113140655	113153273	12619	*	7.8	7.3	8.17	-0.86	8.96e-08	1.54e-06	146	170.03	301.9	273.67	Promoter (<=1kb)	12	113152012	113153879	1868	1	12925	uc007pfz.1	0	ENSMUSG00000006360	Crip1	cysteine-rich protein 1 (intestinal)	uc007pga.2;uc007pgb.2;uc007pfv.1;uc007pfw.1;uc007pfx.1;uc033gfx.1;uc033gfy.1;uc033gfz.1;uc033gga.1;uc033ggb.1;uc033ggc.1;uc033ggd.1;uc033gge.1;uc007pfz.1;uc007pfy.3	104732;104732;116870;116870;116870;116870;116870;116870;116870;116870;116870;116870;116870;12925;68337	-3148;-3148;42377;42377;42377;42377;42377;42377;42377;42377;42377;42377;42377;0;0
chr12	17172822	17178623	5802	*	6.83	6.11	7.32	-1.21	9.32e-08	1.6e-06	72	65.88	172.83	145.88	Promoter (<=1kb)	12	17172100	17176888	4789	2	382571	uc007ncn.2	0	ENSMUSG00000051726	Kcnf1	potassium voltage-gated channel, subfamily F, member 1	uc007ncn.2	382571	0
chr9	30932599	30945776	13178	*	7.9	7.43	8.25	-0.82	9.36e-08	1.61e-06	184	160.24	312.42	295.98	Promoter (<=1kb)	9	30942562	30963838	21277	1	30806	uc009ora.2	0	ENSMUSG00000031994	Adamts8	a disintegrin-like and metallopeptidase (reprolysin type) with thrombospondin type 1 motif, 8	uc009ora.2;uc012gpt.2	30806;30806	0;0
chr2	32739611	32746672	7062	*	7.07	6.39	7.53	-1.13	9.36e-08	1.61e-06	71	97.03	188.34	180.24	Promoter (<=1kb)	2	32732620	32741016	8397	2	70730	uc029tws.2	0	ENSMUSG00000009551	6330409D20Rik	RIKEN cDNA 6330409D20 gene	uc008jgp.2;uc008jgq.2;uc008jgr.2;uc029tws.2	27387;27387;27387;70730	0;0;0;0
chr13	42299457	42306747	7291	*	7.02	6.35	7.47	-1.12	9.42e-08	1.61e-06	83	80.12	191.11	163.96	Promoter (<=1kb)	13	42301476	42307990	6515	1	13614	uc007qfl.3	0	ENSMUSG00000021367	Edn1	endothelin 1	uc007qfl.3	13614	0
chr16	18116382	18132588	16207	*	7.91	7.45	8.26	-0.81	9.63e-08	1.65e-06	169	180.71	304.12	307.43	Promoter (<=1kb)	16	18127706	18152408	24703	1	65079	uc007ymv.1	0	ENSMUSG00000043811	Rtn4r	reticulon 4 receptor	uc007ymv.1	65079	0
chr6	48626316	48633144	6829	*	6.81	6.09	7.29	-1.2	9.93e-08	1.7e-06	72	64.1	165.63	147.69	Promoter (<=1kb)	6	48626764	48633688	6925	1	243373	uc009bvd.2	0	ENSMUSG00000053297	AI854703	expressed sequence AI854703	uc009bvb.1;uc009bvc.1;uc009bvd.2;uc009bve.2	243372;243372;243373;243373	20780;13138;0;0
chr1	40672864	40692323	19460	*	8.57	8.21	8.86	-0.65	1.02e-07	1.75e-06	291	302.67	473.07	456.32	Promoter (<=1kb)	1	40681712	40727160	45449	1	226999	uc007aum.1	0	ENSMUSG00000026062	Slc9a2	solute carrier family 9 (sodium/hydrogen exchanger), member 2	uc007aum.1;uc007aun.1	226999;226999	0;0
chr6	117162718	117173276	10559	*	7.54	7	7.93	-0.94	1.04e-07	1.78e-06	116	139.76	253.71	235.7	Promoter (<=1kb)	6	117168535	117175069	6535	1	20315	uc009dks.2	0	ENSMUSG00000061353	Cxcl12	chemokine (C-X-C motif) ligand 12	uc009dks.2;uc009dkt.2;uc009dku.2	20315;20315;20315	0;0;0
chr7	45611360	45633328	21969	*	8.29	7.89	8.6	-0.71	1.07e-07	1.82e-06	248	225.22	397.73	378.56	Promoter (<=1kb)	7	45617606	45621059	3454	1	14343	uc009gwf.2	0	ENSMUSG00000008461	Fut1	fucosyltransferase 1	uc009gwj.1;uc009gwf.2;uc009gwg.2;uc009gwe.1;uc009gwi.1;uc009gwh.1	100126243;14343;14343;56636;69903;73456	5430;0;0;0;0;0
chr7	46394600	46399399	4800	*	6.57	5.75	7.08	-1.34	1.14e-07	1.93e-06	55	52.52	148.46	122.97	Promoter (<=1kb)	7	46396468	46433353	36886	1	16502	uc009gyo.2	0	ENSMUSG00000058975	Kcnc1	potassium voltage gated channel, Shaw-related subfamily, member 1	uc009gyo.2;uc009gyn.2	16502;16502	0;0
chr8	120221608	120244984	23377	*	8.74	8.4	9.02	-0.62	1.15e-07	1.94e-06	321	352.52	528.46	507.56	Promoter (<=1kb)	8	120204434	120228230	23797	2	434353	uc009nqy.1	0	ENSMUSG00000097960	A330074K22Rik	RIKEN cDNA A330074K22 gene	uc009nqy.1	434353	0
chr9	48830412	48842211	11800	*	7.64	7.12	8.02	-0.9	1.18e-07	2e-06	139	138.87	281.4	238.71	Promoter (<=1kb)	9	48654297	48835945	181649	2	235320	uc009pil.1	0	ENSMUSG00000066687	Zbtb16	zinc finger and BTB domain containing 16	uc009pil.1;uc009pim.1;uc009pin.1	235320;235320;235320	0;0;0
chr1	74852269	74867957	15689	*	7.94	7.49	8.28	-0.79	1.19e-07	2.01e-06	185	175.37	310.21	312.25	Promoter (<=1kb)	1	74855029	74857732	2704	1	12570	uc007bng.2	0	ENSMUSG00000090071	Cdk5r2	cyclin-dependent kinase 5, regulatory subunit 2 (p39)	uc007bng.2	12570	0
chr11	104130456	104142908	12453	*	7.91	7.43	8.27	-0.84	1.2e-07	2.02e-06	160	186.05	330.7	288.14	Promoter (<=1kb)	11	104132781	104175523	42743	1	12921	uc007lvz.2	0	ENSMUSG00000018634	Crhr1	corticotropin releasing hormone receptor 1	uc007lvz.2;uc007lwa.3;uc011yfy.2	12921;12921;12921	0;0;0
chr8	70595102	70645388	50287	*	9.75	9.47	9.99	-0.51	1.21e-07	2.05e-06	686	736.2	1092.38	937.36	Promoter (<=1kb)	8	70616844	70620850	4007	1	211228	uc009maz.1	0	ENSMUSG00000049988	Lrrc25	leucine rich repeat containing 25	uc009mau.1;uc009maz.1;uc009mba.2;uc009mbc.2;uc009mav.1;uc009maw.1;uc009max.2;uc009may.1	13716;211228;23886;66522;71780;71780;76900;76900	0;0;0;14350;0;0;0;0
chr11	115857426	115860571	3146	*	6.2	5.2	6.79	-1.59	1.23e-07	2.07e-06	36	37.39	127.41	94.04	Distal Intergenic	11	115824058	115855780	31723	1	217325	uc011yhq.1	33368	ENSMUSG00000020782	Llgl2	LLGL2 scribble cell polarity complex component	uc007mit.1;uc011yhq.1	217325;217325	33368;33368
chr5	129578393	129587039	8647	*	6.96	6.26	7.43	-1.16	1.25e-07	2.1e-06	69	84.57	186.68	157.33	Promoter (<=1kb)	5	129584169	129609154	24986	1	23948	uc008zsy.2	0	ENSMUSG00000029436	Mmp17	matrix metallopeptidase 17	uc008zsy.2	23948	0
chr19	10374409	10391791	17383	*	7.96	7.51	8.29	-0.78	1.25e-07	2.11e-06	181	184.27	314.09	314.06	Promoter (<=1kb)	19	10389090	10453181	64092	1	54525	uc008gpp.2	0	ENSMUSG00000024743	Syt7	synaptotagmin VII	uc008gpp.2;uc008gpq.2;uc012bin.1	54525;54525;54525	0;0;0
chr6	118192399	118204227	11829	*	7.73	7.18	8.12	-0.94	1.26e-07	2.12e-06	142	147.77	317.41	239.31	Promoter (<=1kb)	6	118151748	118197744	45997	2	19713	uc009dlm.1	0	ENSMUSG00000030110	Ret	ret proto-oncogene	uc009dlm.1;uc009dln.1	19713;19713	0;0
chr5	112569510	112578925	9416	*	7.48	6.94	7.87	-0.92	1.28e-07	2.16e-06	127	119.29	242.07	225.45	Promoter (<=1kb)	5	112419151	112577198	158048	2	56747	uc008ytk.2	0	ENSMUSG00000058153	Sez6l	seizure related 6 homolog like	uc008ytk.2;uc008ytl.2;uc012ebi.2;uc008ytm.1;uc012ebk.1	56747;56747;56747;67325;67325	0;0;0;11071;11071
chr11	69957487	69967452	9966	*	7.62	7.06	8.02	-0.96	1.29e-07	2.16e-06	115	152.23	278.63	239.92	Promoter (<=1kb)	11	69964779	69967886	3108	1	53624	uc011xxl.1	0	ENSMUSG00000018569	Cldn7	claudin 7	uc011xxl.1;uc007jtb.2;uc007jtc.4;uc029rmj.2;uc007jte.4	53624;53624;54351;54351;54351	0;0;12796;13110;13783
chr6	37296450	37310855	14406	*	8.14	7.73	8.47	-0.73	1.3e-07	2.18e-06	215	210.09	357.85	349.03	Promoter (<=1kb)	6	36846022	37299976	453955	2	320127	uc009bjb.1	0	ENSMUSG00000038665	Dgki	diacylglycerol kinase, iota	uc009bjb.1;uc057lpq.1	320127;320127	0;0
chr9	73083979	73107238	23260	*	8.57	8.2	8.87	-0.67	1.32e-07	2.21e-06	279	309.79	494.67	441.86	Promoter (<=1kb)	9	73102398	73104443	2046	1	66991	uc009qqy.2	0	ENSMUSG00000092622	Khdc3	KH domain containing 3, subcortical maternal complex member	uc009qqv.2;uc009qqw.2;uc009qqx.2;uc009qqy.2;uc009qqz.3	11891;11891;11891;66991;66991	0;0;0;0;0
chr9	64379016	64389275	10260	*	7.7	7.21	8.07	-0.86	1.35e-07	2.25e-06	143	154.01	275.31	262.22	Promoter (<=1kb)	9	64385626	64649845	264220	1	214058	uc009qby.2	0	ENSMUSG00000036466	Megf11	multiple EGF-like-domains 11	uc009qby.2;uc012gvd.2;uc009qbz.2;uc009qca.2;uc012gve.1	214058;214058;214058;214058;214058	0;0;0;0;0
chr2	172933378	172942356	8979	*	7.17	6.57	7.6	-1.03	1.36e-07	2.26e-06	100	89.91	190.56	196.51	Promoter (<=1kb)	2	172868012	172940321	72310	2	12162	uc008odb.3	0	ENSMUSG00000008999	Bmp7	bone morphogenetic protein 7	uc008odb.3;uc008odc.2	12162;12162	0;0
chr13	78154177	78232252	78076	*	10.39	10.19	10.57	-0.38	1.36e-07	2.27e-06	1191	1145.7	1563.79	1480.49	Promoter (<=1kb)	13	78188973	78196354	7382	2	13865	uc057kqk.1	0	ENSMUSG00000069171	Nr2f1	nuclear receptor subfamily 2, group F, member 1	uc057kqk.1;uc007rhe.2;uc029sch.1;uc007rgy.2;uc007rgz.2;uc007rha.2;uc011zcc.1	13865;13865;320174;68675;68675;68675;68675	0;0;0;0;0;0;0
chr5	122046055	122058680	12626	*	7.62	7.12	7.99	-0.88	1.37e-07	2.27e-06	138	139.76	262.02	247.75	Promoter (<=1kb)	5	121860216	122047825	187610	2	13048	uc008zkm.1	0	ENSMUSG00000042589	Cux2	cut-like homeobox 2	uc008zkm.1;uc057bvk.1	13048;13048	0;0
chr19	43369829	43396869	27041	*	9.1	8.78	9.35	-0.57	1.42e-07	2.36e-06	431	449.56	692.43	616.67	Promoter (<=1kb)	19	42788595	43388355	599761	2	545291	uc008hoe.2	0	ENSMUSG00000074852	Hpse2	heparanase 2	uc008hoe.2	545291	0
chr2	163914053	163921141	7089	*	7.21	6.6	7.64	-1.04	1.44e-07	2.39e-06	93	100.59	215.48	182.65	Promoter (<=1kb)	2	163863881	163918683	54803	2	241770	uc008nto.1	0	ENSMUSG00000035226	Rims4	regulating synaptic membrane exocytosis 4	uc008nto.1	241770	0
chr15	101856997	101880543	23547	*	8.52	8.15	8.81	-0.65	1.45e-07	2.39e-06	290	278.64	461.99	432.82	Promoter (<=1kb)	15	101859856	101869618	9763	2	406220	uc007xud.1	0	ENSMUSG00000067594	Krt77	keratin 77	uc007xud.1;uc007xue.1	406220;77055	0;12377
chr7	130926670	130938035	11366	*	7.66	7.16	8.03	-0.87	1.45e-07	2.39e-06	135	151.34	262.02	261.02	Promoter (<=1kb)	7	130936203	130985658	49456	1	56213	uc009kau.2	0	ENSMUSG00000006205	Htra1	HtrA serine peptidase 1	uc009kau.2	56213	0
chr15	80281061	80290544	9484	*	7.43	6.88	7.83	-0.95	1.45e-07	2.4e-06	121	113.95	243.18	211.59	Promoter (<=1kb)	15	80287238	80398292	111055	1	239556	uc009var.1	0	ENSMUSG00000022416	Cacna1i	calcium channel, voltage-dependent, alpha 1I subunit	uc009var.1	239556	0
chr12	111477890	111497263	19374	*	8.5	8.12	8.8	-0.68	1.46e-07	2.4e-06	275	282.2	473.07	417.14	Promoter (<=1kb)	12	111484609	111485823	1215	2	212539	uc007pdc.2	0	ENSMUSG00000010529	Gm266	predicted gene 266	uc007pdc.2	212539	0
chr3	84459337	84484425	25089	*	8.55	8.18	8.83	-0.65	1.46e-07	2.41e-06	278	303.56	450.91	461.75	Promoter (<=1kb)	3	84442196	84479491	37296	2	229474	uc008pqc.3	0	ENSMUSG00000041842	Fhdc1	FH2 domain containing 1	uc008pqc.3;uc008pqd.3	229474;229474	0;0
chr1	136048421	136052436	4016	*	6.46	5.62	6.98	-1.36	1.48e-07	2.43e-06	46	52.52	130.18	122.97	Promoter (<=1kb)	1	136050804	136051370	567	1	226439	uc033fly.1	0	ENSMUSG00000097918	Ascl5	achaete-scute family bHLH transcription factor 5	uc007cuf.1;uc007cug.1;uc033fly.1	12292;12292;226439	-465;-465;0
chr18	23026249	23053541	27293	*	9.14	8.82	9.4	-0.58	1.48e-07	2.44e-06	482	421.07	708.5	639.58	Promoter (<=1kb)	18	22693155	23038663	345509	2	319211	uc008efq.2	0	ENSMUSG00000041923	Nol4	nucleolar protein 4	uc008efq.2;uc008efr.2;uc057kzi.1;uc057kzj.1	319211;319211;319211;319211	0;0;0;0
chr11	70312931	70365290	52360	*	9.64	9.39	9.86	-0.47	1.48e-07	2.44e-06	664	673.89	958.88	898.18	Promoter (<=1kb)	11	70315613	70322518	6906	2	11685	uc007jun.1	0	ENSMUSG00000018907	Alox12e	arachidonate lipoxygenase, epidermal	uc007jun.1;uc007juo.1	11685;11687	0;0
chr6	120489582	120502329	12748	*	7.51	6.98	7.9	-0.92	1.49e-07	2.44e-06	119	132.64	249.83	227.26	Promoter (<=1kb)	6	120488939	120493807	4869	2	94047	uc009dnk.1	0	ENSMUSG00000094626	Tmem121b	transmembrane protein 121B	uc009dnk.1	94047	0
chr4	123224222	123245441	21220	*	8.37	7.98	8.67	-0.69	1.52e-07	2.48e-06	259	247.48	425.98	390.62	Promoter (<=1kb)	4	123233556	123249870	16315	1	56198	uc008uoz.1	0	ENSMUSG00000032744	Heyl	hairy/enhancer-of-split related with YRPW motif-like	uc008uoz.1	56198	0
chr4	134340944	134350161	9218	*	7.36	6.77	7.78	-1	1.52e-07	2.48e-06	110	108.61	243.18	195.31	Promoter (<=1kb)	4	134343046	134354484	11439	1	230810	uc008veu.2	0	ENSMUSG00000028836	Slc30a2	solute carrier family 30 (zinc transporter), member 2	uc008veu.2;uc008vev.2	230810;230810	0;0
chr7	99611361	99637117	25757	*	8.66	8.3	8.94	-0.64	1.55e-07	2.53e-06	312	319.59	517.38	464.76	Promoter (<=1kb)	7	99624067	99627103	3037	2	100503386	uc012fpx.1	0	ENSMUSG00000096606	Tpbgl	trophoblast glycoprotein-like	uc012fpx.1;uc009ilu.1;uc009ilv.1	100503386;109689;109689	0;75875;75875
chr2	154548781	154553516	4736	*	6.57	5.76	7.09	-1.33	1.56e-07	2.55e-06	48	60.53	145.69	126.59	Promoter (<=1kb)	2	154551776	154553276	1501	1	70362	uc012cgx.1	0	ENSMUSG00000078129	Actl10	actin-like 10	uc008njh.1;uc008nji.1;uc012cgx.1;uc008njj.2	56846;56846;70362;75480	0;0;0;0
chr8	104465541	104632212	166672	*	11.68	11.55	11.8	-0.25	1.56e-07	2.55e-06	2959	3040.95	3606.18	3516.77	Promoter (<=1kb)	8	104534700	104550343	15644	1	12354	uc009nat.2	0	ENSMUSG00000031883	Car7	carbonic anhydrase 7	uc009nat.2;uc009nau.1;uc009nav.1;uc029wvd.1;uc009nax.2;uc009nay.2;uc009nas.2;uc033jhd.1;uc009naq.1;uc009nar.1;uc009naw.1;uc009naz.1	12354;12354;12354;12556;12556;12556;234664;320022;320022;320022;382051;56437	0;0;0;0;0;0;0;0;0;0;0;0
chr9	78388552	78398152	9601	*	7.53	7.01	7.92	-0.9	1.57e-07	2.55e-06	123	135.31	247.61	235.7	Promoter (<=1kb)	9	78395777	78423589	27813	1	100048658	uc012gxe.1	0	ENSMUSG00000070291	Ddx43	DEAD (Asp-Glu-Ala-Asp) box polypeptide 43	uc012gxe.1	100048658	0
chr2	93178255	93190198	11944	*	7.5	6.98	7.89	-0.91	1.59e-07	2.58e-06	124	128.19	245.4	228.46	Promoter (<=1kb)	2	93187584	93201757	14174	1	277414	uc008lfq.1	0	ENSMUSG00000068735	Trp53i11	transformation related protein 53 inducible protein 11	uc008lfq.1;uc008lfr.1;uc008lfs.1	277414;277414;277414	0;0;0
chr4	117924445	117934349	9905	*	7.4	6.84	7.81	-0.97	1.59e-07	2.59e-06	112	116.62	244.29	204.35	Promoter (<=1kb)	4	117926160	117929763	3604	2	11876	uc008ujh.2	0	ENSMUSG00000028539	Artn	artemin	uc008ujh.2;uc008uji.2;uc008ujj.2;uc012djv.2;uc008ujk.3;uc008ujl.3;uc008ujm.3;uc033idz.1	11876;11876;11876;11876;20441;20441;20441;20441	0;0;0;0;0;0;0;0
chr19	4977381	5001433	24053	*	8.7	8.36	8.98	-0.62	1.61e-07	2.61e-06	313	344.51	508.52	500.93	Promoter (<=1kb)	19	4984355	4989971	5617	2	225872	uc008gbu.2	0	ENSMUSG00000045903	Npas4	neuronal PAS domain protein 4	uc008gbu.2;uc012bgr.1	225872;225872	0;0
chr4	148949644	148953858	4215	*	6.32	5.42	6.86	-1.44	1.65e-07	2.68e-06	44	41.84	122.98	109.71	3' UTR	4	148804392	148954892	150501	1	69743	uc008vvn.2	145252	ENSMUSG00000028977	Casz1	castor zinc finger 1	uc008vvl.1;uc008vvn.2	69743;69743	0;0
chr5	134965791	134995010	29220	*	8.89	8.56	9.15	-0.59	1.71e-07	2.76e-06	356	399.7	576.1	562.42	Promoter (<=1kb)	5	134986214	134987476	1263	1	12739	uc008zxe.2	0	ENSMUSG00000070473	Cldn3	claudin 3	uc008zxe.2;uc008zxf.1	12739;71304	0;0
chr8	119413043	119466707	53665	*	9.76	9.5	9.97	-0.47	1.73e-07	2.8e-06	725	722.85	1059.7	950.02	Promoter (<=1kb)	8	119446719	119472635	25917	1	117148	uc009npq.1	0	ENSMUSG00000031837	Necab2	N-terminal EF-hand calcium binding protein 2	uc009npq.1;uc009npn.1;uc009npp.1;uc012glr.1	117148;56690;71839;71839	0;0;0;0
chr13	95515032	95540282	25251	*	8.51	8.14	8.8	-0.66	1.81e-07	2.92e-06	282	281.31	471.41	420.76	Promoter (<=1kb)	13	95511718	95525240	13523	2	14063	uc011zda.3	0	ENSMUSG00000021678	F2rl1	coagulation factor II (thrombin) receptor-like 1	uc011zda.3	14063	0
chr1	135808684	135822626	13943	*	7.85	7.38	8.2	-0.82	1.82e-07	2.93e-06	153	179.82	299.13	289.35	Promoter (<=1kb)	1	135818598	135833341	14744	1	16763	uc007ctt.1	0	ENSMUSG00000041782	Lad1	ladinin	uc007ctt.1;uc033flq.2;uc057kgn.1	16763;21952;21952	0;0;0
chr15	79157848	79167188	9341	*	7.2	6.57	7.65	-1.08	1.83e-07	2.95e-06	87	102.37	224.9	175.42	Promoter (<=1kb)	15	79166066	79216401	50336	1	100041655	uc011zvz.1	0	ENSMUSG00000075555	Gm10863	predicted gene 10863	uc011zvz.1;uc007wsu.2;uc007wsw.1	100041655;20665;20665	0;0;0
chr8	92442795	92490947	48153	*	9.78	9.54	9.99	-0.45	1.85e-07	2.97e-06	765	720.18	1044.74	988.6	Distal Intergenic	8	92357796	92361456	3661	1	54352	uc009mub.1	84999	ENSMUSG00000031737	Irx5	Iroquois homeobox 5	NA	NA	NA
chr12	14142422	14161754	19333	*	8.56	8.18	8.85	-0.68	1.92e-07	3.09e-06	306	273.29	496.33	429.2	Promoter (<=1kb)	12	14147598	14152038	4441	2	105005	uc007nbn.1	0	ENSMUSG00000020607	Fam84a	family with sequence similarity 84, member A	uc007nbn.1	105005	0
chr1	119045980	119057364	11385	*	7.34	6.78	7.74	-0.97	1.94e-07	3.12e-06	112	107.72	227.67	201.34	Promoter (<=1kb)	1	118834061	119053619	219559	2	14633	uc007cim.1	0	ENSMUSG00000048402	Gli2	GLI-Kruppel family member GLI2	uc007cim.1;uc007cin.1;uc007cio.1;uc007cip.1;uc011wqo.1;uc011wqp.1;uc011wqq.1;uc011wqr.1	14633;14633;14633;14633;14633;14633;14633;14633	0;0;0;0;0;0;0;0
chr9	108820697	108833315	12619	*	7.83	7.37	8.19	-0.82	1.96e-07	3.13e-06	154	176.26	299.68	283.32	Promoter (<=1kb)	9	108826320	108852969	26650	1	107934	uc009rrb.1	0	ENSMUSG00000023473	Celsr3	cadherin, EGF LAG seven-pass G-type receptor 3	uc009rrb.1;uc009rrc.2;uc009rqz.1	107934;107934;80987	0;0;12317
chr15	82061027	82075924	14898	*	8.14	7.71	8.47	-0.76	1.97e-07	3.15e-06	220	197.63	380.56	327.93	Promoter (<=1kb)	15	82070117	82126814	56698	1	74369	uc011zwp.1	0	ENSMUSG00000068117	Mei1	meiotic double-stranded break formation protein 1	uc007wyb.1;uc011zwp.1	328573;74369	0;0
chr13	54938536	54958191	19656	*	8.23	7.8	8.57	-0.77	2e-07	3.19e-06	224	220.77	422.66	336.97	Promoter (<=1kb)	13	54949411	55006018	56608	1	107448	uc007qpp.2	0	ENSMUSG00000025876	Unc5a	unc-5 netrin receptor A	uc007qpp.2;uc007qpq.2	107448;107448	0;0
chr2	165586810	165600039	13230	*	7.77	7.3	8.12	-0.82	2.09e-07	3.33e-06	158	157.57	278.08	277.89	Promoter (<=1kb)	2	165595028	165771727	176700	1	14049	uc008nxw.2	0	ENSMUSG00000017897	Eya2	EYA transcriptional coactivator and phosphatase 2	uc008nxw.2	14049	0
chr2	31873615	31888476	14862	*	7.95	7.5	8.29	-0.79	2.11e-07	3.35e-06	187	175.37	334.03	293.57	Promoter (<=1kb)	2	31887281	31946535	59255	1	23928	uc008jef.1	0	ENSMUSG00000026840	Lamc3	laminin gamma 3	uc008jef.1;uc012btp.1	23928;23928	0;0
chr18	21647185	21662796	15612	*	8.29	7.89	8.61	-0.72	2.11e-07	3.36e-06	256	218.1	410.47	370.73	Promoter (<=1kb)	18	21550377	21652368	101992	2	225266	uc008efi.1	0	ENSMUSG00000042514	Klhl14	kelch-like 14	uc008efi.1;uc033hfv.1	225266;74644	0;0
chr5	67215175	67233354	18180	*	8.47	8.1	8.77	-0.67	2.11e-07	3.36e-06	287	262.61	457	415.33	Distal Intergenic	5	67260565	67264609	4045	1	67878	uc008xpo.2	-27211	ENSMUSG00000037720	Tmem33	transmembrane protein 33	NA	NA	NA
chr8	120824625	120999281	174657	*	11.65	11.39	11.87	-0.48	2.12e-07	3.36e-06	2588	2767.66	3959.04	3522.2	Distal Intergenic	8	121058803	121060729	1927	2	68790	uc009nrm.2	61448	ENSMUSG00000097336	Fendrr	Foxf1 adjacent non-coding developmental regulatory RNA	NA	NA	NA
chr7	19574961	19579260	4300	*	6.7	5.92	7.2	-1.28	2.13e-07	3.37e-06	59	62.31	167.85	126.59	Promoter (<=1kb)	7	19577287	19580656	3370	1	63872	uc009fmj.2	0	ENSMUSG00000011267	Zfp296	zinc finger protein 296	uc009fml.2;uc009fmm.2;uc009fmn.2;uc009fmj.2;uc009fmi.1	53609;53609;53609;63872;69731	25226;25226;25226;0;-1618
chr2	153026545	153040619	14075	*	7.9	7.46	8.24	-0.78	2.14e-07	3.38e-06	177	175.37	301.35	303.81	Promoter (<=1kb)	2	153031852	153055775	23924	1	228787	uc008nha.1	0	ENSMUSG00000042631	Xkr7	X-linked Kx blood group related 7	uc008nha.1	228787	0
chr5	52104751	52120616	15866	*	8.12	7.7	8.44	-0.74	2.17e-07	3.43e-06	204	212.76	364.5	331.54	Exon (uc008xke.1/uc008xke.1, exon 1 of 2)	5	52135902	52136017	116	2	102466648	uc033ijs.1	15401	ENSMUSG00000098726	Mir6417	microRNA 6417	NA	NA	NA
chr12	51586116	51599492	13377	*	8.19	7.79	8.5	-0.71	2.19e-07	3.45e-06	218	224.33	371.14	353.85	Promoter (<=1kb)	12	51593341	51605773	12433	1	12810	uc007nmr.2	0	ENSMUSG00000020953	Coch	cochlin	uc007nmr.2;uc007nms.2	12810;12810	0;0
chr2	151698516	151704652	6137	*	6.68	5.88	7.2	-1.31	2.19e-07	3.46e-06	45	73	150.67	142.87	Promoter (<=1kb)	2	151702008	151707310	5303	1	108832	uc008nei.2	0	ENSMUSG00000044364	Tmem74b	transmembrane protein 74B	uc008nei.2;uc008nej.1	108832;108832	0;0
chr12	84639936	84658468	18533	*	8.24	7.84	8.55	-0.72	2.22e-07	3.5e-06	215	242.14	386.65	364.1	Promoter (<=1kb)	12	84641019	84651455	10437	1	432677	uc011ypa.1	0	ENSMUSG00000071235	Vrtn	vertebrae development associated	uc011ypa.1;uc011ypb.1;uc007ofq.1	432677;432677;432677	0;0;0
chrY	90717545	90741697	24153	*	8.97	9.22	8.67	0.55	2.25e-07	3.54e-06	594	599.11	413.8	402.67	Distal Intergenic	21	90751140	90755050	3911	2	654820	uc057mdi.1	13353	ENSMUSG00000072844	G530011O06Rik	RIKEN cDNA G530011O06 gene	NA	NA	NA
chr8	126437354	126532969	95616	*	10.83	10.65	10.99	-0.34	2.31e-07	3.63e-06	1573	1643.33	2102.77	1961.53	Promoter (<=1kb)	8	126426652	126475065	48414	2	212728	uc012gne.1	0	ENSMUSG00000090290	Tarbp1	TAR RNA binding protein 1	uc012gne.1	212728	0
chr6	85406048	85410520	4473	*	6.63	5.8	7.15	-1.35	2.37e-07	3.72e-06	42	69.44	147.35	136.23	Distal Intergenic	6	85423886	85428877	4992	1	384452	uc009cpp.2	-13366	ENSMUSG00000068302	Noto	notochord homeobox	NA	NA	NA
chr4	137275384	137284026	8643	*	7.07	6.44	7.51	-1.07	2.41e-07	3.79e-06	87	86.35	199.97	165.17	Promoter (<=1kb)	4	137277635	137299501	21867	1	22417	uc008viv.2	0	ENSMUSG00000036856	Wnt4	wingless-type MMTV integration site family, member 4	uc008viv.2	22417	0
chr15	72544106	72549308	5203	*	6.7	5.95	7.19	-1.25	2.49e-07	3.89e-06	61	62.31	162.86	129.6	Promoter (<=1kb)	15	72512119	72546279	34161	2	223604	uc007wbk.1	0	ENSMUSG00000036760	Kcnk9	potassium channel, subfamily K, member 9	uc007wbk.1	223604	0
chr1	131952591	131968149	15559	*	8.04	7.62	8.37	-0.76	2.49e-07	3.9e-06	183	209.2	340.12	323.71	Promoter (<=1kb)	1	131962915	131982972	20058	1	212980	uc007cnz.2	0	ENSMUSG00000026435	Slc45a3	solute carrier family 45, member 3	uc007cnz.2;uc007coa.2	212980;212980	0;-2460
chr11	3760495	3765956	5462	*	6.69	5.97	7.17	-1.2	2.5e-07	3.91e-06	61	64.1	142.92	145.28	Intron (uc007htp.1/74309, intron 1 of 12)	11	3703731	3775126	71396	2	74309	uc007htp.1	9170	ENSMUSG00000020435	Osbp2	oxysterol binding protein 2	uc007htp.1;uc007htq.1;uc007htr.1	74309;74309;74309	0;0;0
chr5	35047172	35059189	12018	*	7.33	6.77	7.73	-0.96	2.51e-07	3.92e-06	102	116.62	207.73	217.01	Promoter (<=1kb)	5	35056813	35080964	24152	1	231134	uc008xdk.1	0	ENSMUSG00000044716	Dok7	docking protein 7	uc008xdk.1;uc008xdl.1;uc008xdm.1;uc008xdj.3	231134;231134;231134;54426	0;0;0;0
chr8	120096487	120146044	49558	*	9.89	9.64	10.1	-0.45	2.55e-07	3.97e-06	759	842.14	1128.94	1060.34	Promoter (<=1kb)	8	120081095	120101472	20378	2	102193	uc009nqr.1	0	ENSMUSG00000031823	Zdhhc7	zinc finger, DHHC domain containing 7	uc009nqr.1;uc009nqs.1;uc009nqt.1;uc009nqu.2;uc009nqv.2;uc009nqw.2	102193;234797;234797;234797;234797;234797	0;0;0;0;0;0
chr11	97107247	97119226	11980	*	7.81	7.35	8.16	-0.81	2.56e-07	3.98e-06	172	154.01	293.59	277.89	Promoter (<=1kb)	11	97098007	97115331	17325	2	57765	uc007ldr.2	0	ENSMUSG00000001444	Tbx21	T-box 21	uc007ldr.2	57765	0
chr2	152088938	152102962	14025	*	7.62	7.13	7.99	-0.86	2.57e-07	3.99e-06	134	145.99	263.12	245.95	3' UTR	2	152081529	152095802	14274	1	545474	uc012cgb.1	7409	ENSMUSG00000060257	Scrt2	scratch family zinc finger 2	uc012cgb.1;uc008new.2	545474;76650	0;-2562
chr9	57937285	57945757	8473	*	7.12	6.48	7.55	-1.07	2.58e-07	4.01e-06	98	81.01	206.07	169.99	Promoter (<=1kb)	9	57940135	57962865	22731	1	20361	uc009pvy.1	0	ENSMUSG00000038264	Sema7a	sema domain, immunoglobulin domain (Ig), and GPI membrane anchor, (semaphorin) 7A	uc009pvy.1	20361	0
chr1	132179147	132202104	22958	*	8.5	8.12	8.79	-0.68	2.64e-07	4.09e-06	306	250.15	454.79	433.42	Promoter (<=1kb)	1	132191436	132209546	18111	1	213409	uc007coi.2	0	ENSMUSG00000079330	Lemd1	LEM domain containing 1	uc007coi.2;uc007coj.2;uc007cok.2;uc011wrv.1	213409;213409;213409;723818	0;0;0;0
chr9	45425789	45433693	7905	*	7.11	6.48	7.55	-1.07	2.64e-07	4.09e-06	87	91.69	208.28	166.98	Promoter (<=1kb)	9	45426628	45553289	126662	1	114873	uc009pfx.1	0	ENSMUSG00000032087	Dscaml1	DS cell adhesion molecule like 1	uc009pfx.1;uc009pfy.1;uc009pfz.1;uc009pfw.1	114873;114873;114873;74602	0;0;0;0
chr14	54153549	54199536	45988	*	9.45	9.17	9.68	-0.5	2.66e-07	4.11e-06	556	599.11	853.63	784.25	5' UTR	14	54235485	54253929	18445	2	13135	uc007tvm.2	54393	ENSMUSG00000022174	Dad1	defender against cell death 1	NA	NA	NA
chr5	73644450	73655466	11017	*	7.9	7.44	8.24	-0.8	2.67e-07	4.13e-06	187	160.24	318.52	287.54	Promoter (<=1kb)	5	73632749	73647731	14983	2	24051	uc008xtb.1	0	ENSMUSG00000029156	Sgcb	sarcoglycan, beta (dystrophin-associated glycoprotein)	uc008xtb.1;uc008xtc.2;uc008xte.2;uc008xtd.2;uc012dxe.1	24051;73472;73472;73472;73472	0;0;0;-2029;-3762
chr15	75559648	75570220	10573	*	7.69	7.21	8.05	-0.84	2.7e-07	4.17e-06	155	141.54	262.57	266.44	Promoter (<=1kb)	15	75553045	75566648	13604	2	23934	uc007wgu.1	0	ENSMUSG00000022577	Ly6h	lymphocyte antigen 6 complex, locus H	uc007wgu.1;uc011zuk.1;uc011zul.1;uc007wgv.2	23934;23934;23934;23934	0;0;0;0
chr12	108700308	108705759	5452	*	6.64	5.9	7.13	-1.23	2.72e-07	4.2e-06	57	62.31	139.59	139.85	Promoter (<=1kb)	12	108686792	108702306	15515	2	70059	uc011yrv.1	0	ENSMUSG00000021263	Degs2	delta(4)-desaturase, sphingolipid 2	uc011yrv.1;uc007pab.2	70059;70059	0;0
chr3	97886463	97896294	9832	*	7.59	7.09	7.95	-0.86	2.75e-07	4.24e-06	140	132.64	252.04	243.53	Promoter (<=1kb)	3	97689828	97888707	198880	2	83679	uc012cuf.2	0	ENSMUSG00000038170	Pde4dip	phosphodiesterase 4D interacting protein (myomegalin)	uc008qpj.1;uc008qpk.1;uc008qpl.1;uc012cuf.2;uc012cug.2;uc012cuh.2	20333;20333;20333;83679;83679;83679	-4933;-4933;-4933;0;0;0
chr2	163196700	163207956	11257	*	7.77	7.28	8.13	-0.85	2.75e-07	4.24e-06	164	147.77	303.56	257.4	Distal Intergenic	2	163225454	163323102	97649	1	269389	uc008nso.1	-17498	ENSMUSG00000074607	Tox2	TOX high mobility group box family member 2	NA	NA	NA
chr11	116333491	116337591	4101	*	6.23	5.32	6.78	-1.47	2.77e-07	4.25e-06	37	42.73	114.11	106.09	Promoter (<=1kb)	11	116330704	116335354	4651	2	15223	uc007mkv.2	0	ENSMUSG00000034227	Foxj1	forkhead box J1	uc007mkv.2;uc007mkw.1;uc007mkx.2;uc007mky.2	15223;15223;217340;217340	0;0;0;0
chr1	86667303	86675835	8533	*	7.21	6.63	7.62	-0.99	2.83e-07	4.34e-06	95	103.26	203.3	190.49	Promoter (<=1kb)	1	86666293	86670573	4281	2	18159	uc007bvt.2	0	ENSMUSG00000026241	Nppc	natriuretic peptide type C	uc007bvt.2	18159	0
chr4	106619917	106625452	5536	*	6.72	5.93	7.22	-1.29	2.88e-07	4.41e-06	52	70.33	168.95	129.6	Promoter (<=1kb)	4	106622449	106640187	17739	1	230576	uc008tyn.1	0	ENSMUSG00000034919	Ttc22	tetratricopeptide repeat domain 22	uc008tyn.1;uc012dhz.1	230576;242602	0;-2679
chr4	124464783	124491749	26967	*	8.77	8.43	9.04	-0.6	2.91e-07	4.46e-06	326	365.88	538.99	511.78	Promoter (<=1kb)	4	124449626	124485959	36334	2	78460	uc008uqq.1	0	NA	1700057H15Rik	RIKEN cDNA 1700057H15 gene	uc008uqq.1	78460	0
chr7	140917599	140934072	16474	*	8.3	7.92	8.61	-0.69	2.96e-07	4.53e-06	256	227.89	399.95	379.77	Promoter (<=1kb)	7	140920902	140929192	8291	1	101613	uc009kiv.3	0	ENSMUSG00000038745	Nlrp6	NLR family, pyrin domain containing 6	uc009kiv.3;uc029wpm.2	101613;101613	0;0
chr13	43298873	43306530	7658	*	7.31	6.73	7.71	-0.98	3e-07	4.58e-06	116	97.03	223.79	195.91	Promoter (<=1kb)	13	43195519	43304172	108654	2	328232	uc007qfx.1	0	ENSMUSG00000051335	Gfod1	glucose-fructose oxidoreductase domain containing 1	uc007qfx.1;uc007qfy.1	328232;328232	0;0
chr11	102881904	102903023	21120	*	8.28	7.86	8.6	-0.74	3.02e-07	4.61e-06	225	239.47	428.2	349.03	Promoter (<=1kb)	11	102887336	102897200	9865	2	14580	uc007lsw.2	0	ENSMUSG00000020932	Gfap	glial fibrillary acidic protein	uc007lsw.2;uc007lsx.2;uc011yfw.1;uc033gal.1;uc007lsu.2;uc007lsy.3;uc007lst.1	14580;14580;20624;20624;66784;70218;73293	0;0;-929;-929;0;22101;0
chr1	62691570	62711057	19488	*	8.36	7.98	8.67	-0.68	3.06e-07	4.66e-06	248	258.16	429.31	382.78	Promoter (<=1kb)	1	62703317	62739932	36616	1	18187	uc007bfi.1	0	ENSMUSG00000025969	Nrp2	neuropilin 2	uc007bfi.1;uc007bfj.1;uc007bfk.1;uc007bfl.1;uc007bfm.1;uc007bfn.1;uc007bfo.1	18187;18187;18187;18187;18187;18187;18187	0;0;0;0;0;0;0
chr18	34861496	34870188	8693	*	7.41	6.88	7.8	-0.92	3.13e-07	4.77e-06	113	122.85	226.01	218.82	Promoter (<=1kb)	18	34861207	34864956	3750	1	13653	uc008elt.1	289	ENSMUSG00000038418	Egr1	early growth response 1	uc008elt.1	13653	0
chr9	62673363	62679473	6111	*	6.65	5.92	7.14	-1.22	3.22e-07	4.9e-06	56	64.99	144.58	137.44	Promoter (<=1kb)	9	62677855	62783979	106125	1	319480	uc009qal.2	0	ENSMUSG00000032243	Itga11	integrin alpha 11	uc009qal.2	319480	0
chr19	44500271	44515880	15610	*	7.97	7.54	8.31	-0.77	3.23e-07	4.91e-06	173	198.52	328.49	306.23	3' UTR	19	44493472	44514273	20802	1	22423	uc008hpt.2	6799	ENSMUSG00000036961	Wnt8b	wingless-type MMTV integration site family, member 8B	uc008hpt.2;uc008hpu.1;uc012bmg.1	22423;240667;240667	0;29968;29968
chr11	120657151	120665865	8715	*	7.54	7	7.93	-0.93	3.35e-07	5.09e-06	108	147.77	243.18	244.74	Promoter (<=1kb)	11	120653788	120658044	4257	2	77583	uc007mty.3	0	ENSMUSG00000042988	Notum	notum palmitoleoyl-protein carboxylesterase	uc007mty.3;uc007mtz.3	77583;77583	0;0
chr2	31300130	31320453	20324	*	8.17	7.76	8.5	-0.74	3.39e-07	5.13e-06	207	225.22	388.87	333.35	Distal Intergenic	2	31245923	31295472	49550	1	14299	uc008jdq.2	54207	ENSMUSG00000062661	Ncs1	neuronal calcium sensor 1	uc008jdq.2	14299	0
chr8	94166642	94305110	138469	*	11.39	11.25	11.52	-0.27	3.42e-07	5.17e-06	2478	2392.88	2993.52	2875.39	Promoter (<=1kb)	8	94179089	94180327	1239	1	17748	uc009mvw.2	0	ENSMUSG00000031765	Mt1	metallothionein 1	uc009mvw.2;uc009mvx.2;uc009mvv.1;uc009mvy.1;uc009mvz.1;uc009mwa.1;uc009mwb.1	17748;17748;17750;71805;71805;71805;71805	0;0;0;0;0;0;0
chr12	79129693	79141330	11638	*	7.85	7.4	8.19	-0.79	3.46e-07	5.23e-06	178	159.35	292.48	289.95	Promoter (<=1kb)	12	79130788	79156301	25514	1	11847	uc007nzv.2	0	ENSMUSG00000021125	Arg2	arginase type II	uc007nzv.2	11847	0
chr15	98694415	98709121	14707	*	8.02	7.6	8.35	-0.76	3.5e-07	5.28e-06	185	202.08	342.34	311.05	Promoter (<=1kb)	15	98708227	98710870	2644	1	105833	uc007xnk.1	0	ENSMUSG00000003354	Ccdc65	coiled-coil domain containing 65	uc007xnk.1;uc007xnl.2	105833;105833	0;0
chr1	192832604	192837913	5310	*	6.8	6.11	7.26	-1.15	3.52e-07	5.31e-06	68	70.33	161.2	145.28	Distal Intergenic	1	192841705	192842739	1035	1	73455	uc007edr.2	-3792	NA	1700065J18Rik	RIKEN cDNA 1700065J18 gene	uc007edr.2	73455	-3792
chr7	47119868	47136677	16810	*	8.26	7.88	8.56	-0.68	3.53e-07	5.31e-06	239	230.56	375.57	377.36	Promoter (<=1kb)	7	47077798	47132598	54801	2	19259	uc009gzz.3	0	ENSMUSG00000030854	Ptpn5	protein tyrosine phosphatase, non-receptor type 5	uc009gzz.3;uc009haa.3;uc009hab.3;uc009hac.1	19259;19259;19259;19259	0;0;0;0
chr12	86207514	86226186	18673	*	8.32	7.95	8.62	-0.67	3.54e-07	5.31e-06	237	256.38	399.39	387.6	Distal Intergenic	12	86241858	86291785	49928	1	70373	uc007ohr.2	-15672	ENSMUSG00000021254	Gpatch2l	G patch domain containing 2 like	NA	NA	NA
chr12	109048445	109060384	11940	*	7.47	6.92	7.87	-0.95	3.54e-07	5.31e-06	121	121.07	260.35	206.16	Exon (uc007pal.1/380785, exon 2 of 7)	12	109032182	109068217	36036	2	380785	uc007pal.1	7833	ENSMUSG00000040867	Begain	brain-enriched guanylate kinase-associated	uc007pal.1	380785	0
chr1	91797695	91808036	10342	*	7.61	7.11	7.99	-0.88	3.63e-07	5.44e-06	143	132.64	274.76	232.08	Promoter (<=1kb)	1	91801461	91848034	46574	1	13345	uc007cbd.2	0	ENSMUSG00000007805	Twist2	twist basic helix-loop-helix transcription factor 2	uc007cbd.2	13345	0
chr2	93945313	93959951	14639	*	8.01	7.6	8.34	-0.74	3.69e-07	5.54e-06	190	196.74	329.6	316.47	Promoter (<=1kb)	2	93955810	93957100	1291	2	620695	uc012bzx.1	0	ENSMUSG00000087006	Gm13889	predicted gene 13889	uc012bzx.1	620695	0
chr1	34748742	34757552	8811	*	7.41	6.86	7.8	-0.94	3.7e-07	5.54e-06	117	115.73	243.18	203.15	Intron (uc007apf.1/226970, intron 3 of 12)	1	34721924	34812754	90831	1	226970	uc007apf.1	26818	ENSMUSG00000037509	Arhgef4	Rho guanine nucleotide exchange factor (GEF) 4	uc007apf.1	226970	0
chr7	19277504	19286819	9316	*	7.25	6.69	7.66	-0.97	3.73e-07	5.57e-06	111	95.25	206.07	197.12	Promoter (<=1kb)	7	19282624	19290125	7502	1	20167	uc009flh.2	0	ENSMUSG00000030401	Rtn2	reticulon 2 (Z-band associated protein)	uc009flh.2;uc009fli.2;uc009flj.2;uc009flg.1	20167;20167;20167;232941	0;0;-4250;0
chr19	42426907	42443725	16819	*	8.02	7.6	8.35	-0.75	3.75e-07	5.61e-06	193	194.07	342.89	308.03	Promoter (<=1kb)	19	42283037	42431783	148747	2	72832	uc008hno.1	0	ENSMUSG00000042401	Crtac1	cartilage acidic protein 1	uc008hno.1	72832	0
chr2	109671226	109715000	43775	*	9.73	9.49	9.93	-0.44	3.79e-07	5.66e-06	733	705.94	1004.86	952.43	Promoter (<=1kb)	2	109674700	109727043	52344	1	12064	uc008lmd.1	0	ENSMUSG00000048482	Bdnf	brain derived neurotrophic factor	uc008lmd.1;uc008lme.1;uc008lmf.1;uc008lmg.1;uc008lmh.1;uc008lmi.1;uc008lmj.1;uc008lmk.1;uc008lml.1;uc008lmm.1;uc008lmn.2	12064;12064;12064;12064;12064;12064;12064;12064;12064;12064;12064	0;0;0;0;0;0;0;0;0;0;0
chr13	58804505	58810131	5627	*	6.94	6.3	7.38	-1.07	3.89e-07	5.79e-06	78	80.12	166.18	166.37	Promoter (<=1kb)	13	58806569	58937031	130463	1	18212	uc007quh.2	0	ENSMUSG00000055254	Ntrk2	neurotrophic tyrosine kinase, receptor, type 2	uc007quh.2;uc007qui.2;uc007quj.2;uc007quk.1	18212;18212;18212;18212	0;0;0;0
chr1	23753780	23777462	23683	*	8.55	8.21	8.82	-0.62	3.99e-07	5.94e-06	292	298.22	457	448.49	Promoter (<=1kb)	1	23761926	23815740	53815	1	280645	uc007amd.1	0	ENSMUSG00000026156	B3gat2	beta-1,3-glucuronyltransferase 2 (glucuronosyltransferase S)	uc007amd.1;uc007ame.2	280645;280645	0;0
chr8	126736876	126846300	109425	*	11	10.83	11.15	-0.32	4.03e-07	5.99e-06	1845	1798.22	2353.71	2179.15	Promoter (2-3kb)	8	126849020	126851833	2814	1	414091	uc009nyz.1	-2720	NA	A630001O12Rik	RIKEN cDNA A630001O12 gene	uc009nyz.1	414091	0
chr16	20724029	20738014	13986	*	7.81	7.33	8.17	-0.84	4.05e-07	6.01e-06	179	142.43	304.67	269.45	Promoter (<=1kb)	16	20733127	20738152	5026	1	12667	uc007yrc.1	0	ENSMUSG00000006958	Chrd	chordin	uc007yrc.1;uc007yrd.1;uc007yre.2;uc012adc.1;uc012add.1;uc012ade.1;uc012adf.1;uc007yra.2;uc033gyj.1;uc033gyk.1;uc007yrb.1;uc007yqz.1	12667;12667;12667;12667;12667;12667;12667;21832;21832;21832;21832;245841	0;0;0;0;0;0;0;0;0;0;0;6203
chr7	16943884	16949563	5680	*	6.69	5.95	7.17	-1.22	4.05e-07	6.02e-06	59	64.99	157.32	130.81	Promoter (<=1kb)	7	16944682	16948828	4147	1	434128	uc009fio.2	0	ENSMUSG00000070802	Pnmal2	PNMA-like 2	uc009fio.2	434128	0
chr8	87307378	87500036	192659	*	11.89	11.77	12	-0.23	4.1e-07	6.08e-06	3458	3529.68	4205.55	3996.61	Promoter (<=1kb)	8	87472812	87525554	52743	1	100040294	uc009mqs.1	0	ENSMUSG00000097248	Gm2694	predicted gene 2694	uc009mqs.1;uc057ami.1;uc009mqr.1	100040294;100040294;12404	0;0;0
chr7	3301397	3305940	4544	*	6.52	5.74	7.02	-1.28	4.29e-07	6.35e-06	57	49.85	138.49	121.16	Promoter (<=1kb)	7	3303532	3331099	27568	1	18752	uc012ewe.3	0	ENSMUSG00000078816	Prkcg	protein kinase C, gamma	uc012ewe.3;uc029wcz.3;uc009eup.1;uc009euq.1;uc009eur.1;uc009eus.1	18752;18752;50918;50918;50918;50918	0;0;12359;10842;10841;8369
chr5	117823146	117844634	21489	*	8.25	7.85	8.57	-0.72	4.38e-07	6.48e-06	240	219.88	410.47	347.22	Promoter (<=1kb)	5	117842186	117958840	116655	1	18125	uc008zfx.4	0	ENSMUSG00000029361	Nos1	nitric oxide synthase 1, neuronal	uc008zfx.4	18125	0
chr2	34906156	34919331	13176	*	7.83	7.36	8.18	-0.83	4.43e-07	6.54e-06	145	182.49	301.35	279.1	Promoter (<=1kb)	2	34893755	34913976	20222	2	74016	uc008jjh.1	0	ENSMUSG00000026873	Phf19	PHD finger protein 19	uc008jjh.1;uc008jji.1	74016;74016	0;0
chr4	36945251	36957136	11886	*	8.02	7.58	8.36	-0.79	4.44e-07	6.55e-06	218	163.8	325.17	333.95	Promoter (<=1kb)	4	35706647	36951744	1245098	2	242384	uc008shb.3	0	ENSMUSG00000045083	Lingo2	leucine rich repeat and Ig domain containing 2	uc008shb.3	242384	0
chr5	127233558	127246851	13294	*	7.96	7.5	8.3	-0.8	4.48e-07	6.61e-06	161	201.19	335.69	296.58	Promoter (<=1kb)	5	127241826	127565790	323965	1	208213	uc008zry.2	0	ENSMUSG00000034324	Tmem132c	transmembrane protein 132C	uc008zry.2	208213	0
chr4	124562995	124577491	14497	*	7.92	7.45	8.27	-0.83	4.52e-07	6.65e-06	148	201.19	312.42	306.83	Promoter (<=1kb)	4	124569179	124575538	6360	1	108809	uc008uqs.2	0	NA	4933407E24Rik	RIKEN cDNA 4933407E24 gene	uc008uqs.2	108809	0
chr17	8784148	8805083	20936	*	8.61	8.26	8.89	-0.63	4.6e-07	6.75e-06	281	331.16	471.41	476.22	Promoter (<=1kb)	17	8801745	8899189	97445	1	23984	uc012ajt.1	0	ENSMUSG00000023868	Pde10a	phosphodiesterase 10A	uc008ajr.1;uc012ajt.1;uc008ajs.1;uc008ajt.1	23984;23984;23984;23984	0;0;0;0
chr8	70852966	70876529	23564	*	8.65	8.28	8.94	-0.67	4.6e-07	6.75e-06	277	343.62	522.92	461.75	Promoter (<=1kb)	8	70868227	70873490	5264	2	234388	uc009mby.1	0	ENSMUSG00000007721	Ccdc124	coiled-coil domain containing 124	uc009mby.1;uc012gfj.1;uc009mbv.2;uc009mbw.2;uc009mbx.2;uc012gfk.1	234388;84036;84036;84036;84036;84036	0;0;0;0;0;0
chr13	92417098	92431431	14334	*	7.94	7.51	8.27	-0.76	4.6e-07	6.75e-06	171	194.07	309.65	309.24	Promoter (<=1kb)	13	92425969	92441658	15690	1	218440	uc007rkn.2	0	ENSMUSG00000045034	Ankrd34b	ankyrin repeat domain 34B	uc007rkn.2;uc007rko.2	218440;218440	0;0
chr10	90824014	90839099	15086	*	8.13	7.73	8.45	-0.71	4.63e-07	6.78e-06	224	202.08	341.23	356.26	Promoter (<=1kb)	10	90829843	90923602	93760	1	77531	uc007gtd.1	0	ENSMUSG00000058589	Anks1b	ankyrin repeat and sterile alpha motif domain containing 1B	uc057kjj.1;uc033fsd.2;uc007gta.2;uc033fsa.2;uc033fsb.2;uc033fsc.2;uc007gtd.1	77531;77531;77531;77531;77531;77531;77531	0;0;0;0;0;0;0
chr3	102009211	102026679	17469	*	8.33	7.95	8.62	-0.67	4.63e-07	6.78e-06	245	250.15	411.03	376.75	Promoter (<=1kb)	3	102010145	102015492	5348	1	18072	uc008qrq.2	0	ENSMUSG00000048540	Nhlh2	nescient helix loop helix 2	uc008qrq.2;uc008qro.2	18072;18072	0;0
chr15	31365196	31371760	6565	*	7.09	6.5	7.51	-1.01	4.7e-07	6.86e-06	94	87.24	190.56	174.81	Promoter (<=1kb)	15	31291479	31367759	76281	2	67434	uc007vkd.3	0	ENSMUSG00000022237	Ankrd33b	ankyrin repeat domain 33B	uc007vkd.3;uc007vke.3;uc011zru.2;uc011zrv.2;uc007vkf.2	67434;67434;67434;67434;67434	0;0;0;0;0
chr7	99254510	99275957	21448	*	8.6	8.25	8.89	-0.64	4.71e-07	6.88e-06	284	324.93	495.78	450.3	Promoter (<=1kb)	7	99267447	99320352	52906	1	17760	uc009ilg.1	0	ENSMUSG00000055407	Map6	microtubule-associated protein 6	uc009ilg.1;uc009ilh.1;uc009ili.1;uc033jao.1	17760;17760;17760;381967	0;0;0;0
chr4	152169384	152181749	12366	*	7.77	7.28	8.13	-0.85	4.75e-07	6.92e-06	160	151.34	312.42	249.56	Promoter (<=1kb)	4	152178100	152271855	93756	1	70025	uc008vzx.2	0	ENSMUSG00000028937	Acot7	acyl-CoA thioesterase 7	uc008vzx.2;uc008vzy.2	70025;70025	0;-4385
chr11	75649064	75657086	8023	*	6.76	6.08	7.22	-1.15	4.75e-07	6.92e-06	64	71.22	149.57	149.5	Promoter (<=1kb)	11	75651509	75674643	23135	1	17913	uc007kem.2	0	ENSMUSG00000017774	Myo1c	myosin IC	uc007kem.2;uc007ken.2;uc007keo.1;uc007kep.2;uc007kek.1;uc007kel.1	17913;17913;17913;17913;19062;19062	0;0;0;0;18044;18044
chr18	77789763	77798793	9031	*	7.33	6.79	7.72	-0.92	4.75e-07	6.92e-06	108	113.95	214.38	206.76	Promoter (<=1kb)	18	77789913	77857261	67349	1	19201	uc008frw.1	0	ENSMUSG00000025429	Pstpip2	proline-serine-threonine phosphatase-interacting protein 2	uc008frw.1;uc008fry.1;uc008frx.1	19201;19201;619308	0;0;0
chr7	35111074	35127561	16488	*	8.02	7.57	8.36	-0.78	4.81e-07	6.99e-06	180	201.19	357.85	297.79	Promoter (<=1kb)	7	35119293	35121928	2636	1	12606	uc009gjl.3	0	ENSMUSG00000034957	Cebpa	CCAAT/enhancer binding protein (C/EBP), alpha	uc009gjl.3	12606	0
chr7	24609623	24614391	4769	*	6.94	6.28	7.39	-1.11	4.84e-07	7.02e-06	67	88.13	177.82	157.94	Promoter (<=1kb)	7	24611328	24629297	17970	1	232970	uc009fqc.1	0	ENSMUSG00000074277	Phldb3	pleckstrin homology like domain, family B, member 3	uc009fqc.1;uc009fqd.1;uc009fqb.3	232970;232970;66071	0;-4595;22080
chr6	83082459	83090247	7789	*	7.16	6.58	7.56	-0.98	4.88e-07	7.08e-06	94	97.92	190.56	188.08	Promoter (<=1kb)	6	83086365	83088241	1877	1	16815	uc009cmi.1	0	ENSMUSG00000034968	Lbx2	ladybird homeobox 2	uc009cmi.1;uc009cmg.1;uc009cmh.1	16815;69837;69837	0;4069;3829
chr4	136246513	136252660	6148	*	7.08	6.48	7.51	-1.03	5.01e-07	7.26e-06	84	94.36	192.22	171.2	Promoter (<=1kb)	4	136247957	136274899	26943	1	21401	uc008vhv.2	0	ENSMUSG00000001604	Tcea3	transcription elongation factor A (SII), 3	uc008vhv.2;uc008vhu.2;uc012dng.1	21401;230837;230837	0;0;0
chr9	110243397	110255215	11819	*	7.24	6.68	7.64	-0.96	5.05e-07	7.32e-06	101	104.15	208.84	189.88	Promoter (<=1kb)	9	110243783	110247605	3823	1	29873	uc009rtq.2	0	ENSMUSG00000032482	Cspg5	chondroitin sulfate proteoglycan 5	uc009rtp.1;uc012hbg.1;uc009rtq.2;uc009rtr.2;uc009rts.2;uc009rtt.1;uc009rtu.1	20588;20588;29873;29873;29873;29873;29873	0;0;0;0;0;0;0
chr3	103565058	103583541	18484	*	8.22	7.84	8.53	-0.69	5.2e-07	7.51e-06	245	211.87	377.24	362.29	Promoter (<=1kb)	3	103575282	103630969	55688	1	54524	uc008qsy.2	0	ENSMUSG00000027849	Syt6	synaptotagmin VI	uc008qsy.2;uc033hyw.1;uc033hyx.1;uc008qta.2;uc008qtc.2;uc008qtd.2;uc008qtb.1	54524;54524;54524;54524;54524;54524;54524	0;0;0;0;0;0;0
chr8	72276693	72333339	56647	*	9.87	9.64	10.06	-0.41	5.26e-07	7.59e-06	800	799.41	1076.87	1054.31	Promoter (<=1kb)	8	72319062	72321654	2593	1	16598	uc009mfq.2	0	ENSMUSG00000055148	Klf2	Kruppel-like factor 2 (lung)	uc009mfq.2	16598	0
chr4	104357708	104377245	19538	*	8.35	7.99	8.64	-0.65	5.32e-07	7.67e-06	261	246.59	394.41	403.28	Promoter (<=1kb)	4	104367538	104680389	312852	1	13131	uc008txv.2	0	ENSMUSG00000028519	Dab1	disabled 1	uc008txu.1;uc008txv.2;uc008txw.2;uc012dhu.2	13131;13131;13131;13131	0;0;0;0
chr6	99723462	99734849	11388	*	7.88	7.44	8.21	-0.77	5.33e-07	7.67e-06	170	178.04	303.56	288.14	Promoter (<=1kb)	6	99711299	99726392	15094	2	50501	uc009dbt.1	0	ENSMUSG00000030069	Prok2	prokineticin 2	uc009dbt.1;uc009dbu.1;uc012epr.1;uc009dbv.1	50501;50501;50501;50501	0;0;0;0
chr17	68834822	68865732	30911	*	8.98	8.66	9.24	-0.58	5.35e-07	7.7e-06	371	436.2	629.28	577.49	Promoter (<=1kb)	17	68837136	68843138	6003	1	622645	uc029tkm.1	0	ENSMUSG00000095407	Tmem200c	transmembrane protein 200C	uc029tkm.1	622645	0
chr9	121776009	121779309	3301	*	6.19	5.3	6.74	-1.44	5.5e-07	7.91e-06	36	42.73	105.8	108.51	Promoter (<=1kb)	9	121777607	121783819	6213	1	72330	uc009sdv.2	0	ENSMUSG00000074001	Klhl40	kelch-like 40	uc012hcs.1;uc009sdu.2;uc009sdv.2;uc009sdw.2;uc009sdx.2	270210;270210;72330;74770;74770	15976;8927;0;11811;13198
chr4	145403442	145500795	97354	*	11.98	12.08	11.87	0.22	5.52e-07	7.93e-06	4408	4261.43	3686.5	3779.6	Promoter (<=1kb)	4	145464210	145467961	3752	1	545700	uc008vrx.1	0	ENSMUSG00000052912	Smarca5-ps	SWI/SNF related, matrix associated, actin depenent ragulator of chromatin, subfamily a, member 5, pseudogene	uc008vrx.1	545700	0
chr9	111303245	111318361	15117	*	8.17	7.78	8.48	-0.7	5.53e-07	7.93e-06	228	211.87	367.27	345.41	Promoter (<=1kb)	9	111311739	111357961	46223	1	320429	uc012hbq.1	0	ENSMUSG00000062296	Trank1	tetratricopeptide repeat and ankyrin repeat containing 1	uc012hbq.1;uc009rvt.2	320429;320429	0;0
chr10	60103521	60111358	7838	*	7.2	6.63	7.6	-0.97	5.54e-07	7.93e-06	104	94.36	203.85	185.06	Promoter (<=1kb)	10	60106257	60127338	21082	1	94214	uc007fek.1	0	ENSMUSG00000058297	Spock2	sparc/osteonectin, cwcv and kazal-like domains proteoglycan 2	uc007feh.2;uc007fei.2;uc007fek.1;uc007fel.2	69090;69090;94214;94214	100716;100194;0;0
chr10	95396123	95420885	24763	*	8.66	8.34	8.93	-0.59	5.62e-07	8.05e-06	321	327.6	490.79	483.45	Promoter (<=1kb)	10	95411490	95415283	3794	2	216233	uc011xmb.1	0	ENSMUSG00000020027	Socs2	suppressor of cytokine signaling 2	uc011xmb.1;uc011xmc.1;uc011xmd.1;uc007gwg.2;uc007gwh.1;uc029rer.1	216233;216233;216233;216233;70523;70523	0;0;0;0;0;0
chr4	120030318	120039310	8993	*	7.24	6.68	7.64	-0.95	5.64e-07	8.07e-06	98	107.72	199.97	197.72	Intron (uc008una.1/16656, intron 2 of 8)	4	119814678	120135411	320734	1	16656	uc008una.1	215640	ENSMUSG00000028634	Hivep3	human immunodeficiency virus type I enhancer binding protein 3	uc008una.1	16656	0
chr11	116216926	116225362	8437	*	7.34	6.79	7.73	-0.95	5.77e-07	8.25e-06	105	115.73	229.89	195.31	3' UTR	11	116220559	116238091	17533	2	14027	uc007mkp.1	12729	ENSMUSG00000034282	Evpl	envoplakin	uc007mkp.1;uc007mkn.2;uc011yhu.1;uc007mko.2	14027;69535;69681;69681	0;18071;0;0
chr11	103643429	103661396	17968	*	8.23	7.85	8.53	-0.68	5.8e-07	8.27e-06	221	240.36	371.14	368.31	Promoter (<=1kb)	11	103649509	103650580	1072	1	104582	uc007lvn.1	0	ENSMUSG00000046215	Rprml	reprimo-like	uc007lvn.1;uc007lvl.2;uc007lvm.2;uc056yos.1	104582;69444;78629;78629	0;-4555;0;0
chr4	127325202	127331741	6540	*	7.11	6.53	7.52	-0.99	5.87e-07	8.36e-06	92	92.58	191.11	176.62	Promoter (<=1kb)	4	127325235	127329125	3891	2	14620	uc008uus.2	0	ENSMUSG00000042367	Gjb3	gap junction protein, beta 3	uc008uus.2;uc008uut.2	14620;14620	0;0
chr10	81420143	81432532	12390	*	7.53	7.04	7.89	-0.86	5.87e-07	8.36e-06	135	127.3	246.51	229.07	Promoter (<=1kb)	10	81396191	81420798	24608	2	18029	uc007ghx.1	0	ENSMUSG00000055053	Nfic	nuclear factor I/C	uc033frn.1;uc007ghx.1;uc011xji.1;uc007ghy.1;uc007ghz.1;uc007gia.1	102465778;18029;18029;18029;18029;18029	-3846;0;0;0;0;0
chr13	56219334	56236536	17203	*	8.29	7.92	8.59	-0.66	5.94e-07	8.44e-06	244	241.25	395.52	373.14	Exon (uc056ytv.1/75245, exon 4 of 5)	13	56222224	56243940	21717	2	75245	uc056ytv.1	7404	ENSMUSG00000097361	4930550C17Rik	RIKEN cDNA 4930550C17 gene	uc056ytv.1	75245	0
chr7	118483500	118492850	9351	*	7.43	6.92	7.81	-0.89	6.18e-07	8.78e-06	123	118.4	237.64	210.98	Promoter (<=1kb)	7	118485111	118491975	6865	2	319622	uc009jjx.2	0	ENSMUSG00000095115	Itpripl2	inositol 1,4,5-triphosphate receptor interacting protein-like 2	uc009jjx.2	319622	0
chr9	8896101	8909536	13436	*	8.03	7.63	8.35	-0.72	6.38e-07	9.05e-06	201	194.96	323.5	327.32	Promoter (<=1kb)	9	8899833	8948607	48775	1	18667	uc009odn.1	0	ENSMUSG00000031870	Pgr	progesterone receptor	uc009odn.1;uc009odo.1	18667;18667	0;0
chr6	147250049	147269308	19260	*	8.31	7.95	8.6	-0.66	6.39e-07	9.06e-06	242	251.04	389.98	386.4	Promoter (<=1kb)	6	147252109	147264013	11905	2	19227	uc009esx.3	0	ENSMUSG00000048776	Pthlh	parathyroid hormone-like peptide	uc009esx.3	19227	0
chr1	75448857	75456794	7938	*	6.85	6.19	7.3	-1.11	6.4e-07	9.06e-06	69	77.45	166.18	148.89	Promoter (<=1kb)	1	75450510	75474340	23831	1	241118	uc007bpg.1	0	ENSMUSG00000033007	Asic4	acid-sensing (proton-gated) ion channel family member 4	uc007bpg.1	241118	0
chr11	120522981	120533584	10604	*	7.74	7.27	8.09	-0.83	6.42e-07	9.07e-06	161	146.88	294.7	250.77	Promoter (<=1kb)	11	120530727	120538983	8257	1	14527	uc011yjd.1	0	ENSMUSG00000025127	Gcgr	glucagon receptor	uc011yjd.1;uc007mtc.2	14527;14527	0;0
chr7	81982509	81995664	13156	*	8	7.59	8.32	-0.73	6.65e-07	9.4e-06	190	195.85	331.26	308.64	Promoter (<=1kb)	7	81966662	81992299	25638	2	12173	uc009icu.1	0	ENSMUSG00000025105	Bnc1	basonuclin 1	uc009icu.1	12173	0
chr14	28501544	28514196	12653	*	8.03	7.59	8.36	-0.77	6.78e-07	9.57e-06	188	197.63	361.17	295.98	Promoter (<=1kb)	14	28505473	28525515	20043	1	22418	uc007sug.2	0	ENSMUSG00000021994	Wnt5a	wingless-type MMTV integration site family, member 5A	uc007sug.2;uc007suh.2	22418;22418	0;0
chr14	57046056	57067047	20992	*	8.55	8.21	8.83	-0.62	6.79e-07	9.57e-06	285	306.23	473.07	435.23	Promoter (<=1kb)	14	57034460	57057723	23264	2	14611	uc007ucv.2	0	ENSMUSG00000048582	Gja3	gap junction protein, alpha 3	uc007ucv.2;uc007ucw.2	14611;14611	0;0
chr1	86297998	86311479	13482	*	7.69	7.24	8.04	-0.8	7.08e-07	9.97e-06	146	155.79	258.69	268.25	Promoter (<=1kb)	1	86303221	86307305	4085	1	227327	uc007bvk.2	0	ENSMUSG00000079445	B3gnt7	UDP-GlcNAc:betaGal beta-1,3-N-acetylglucosaminyltransferase 7	uc007bvk.2	227327	0
chr6	31557062	31570465	13404	*	7.82	7.35	8.17	-0.81	7.13e-07	1e-05	166	161.13	315.19	259.21	Promoter (<=1kb)	6	31519493	31563937	44445	2	27205	uc009bgh.2	0	ENSMUSG00000025608	Podxl	podocalyxin-like	uc009bgh.2	27205	0
chr11	49602424	49614659	12236	*	7.77	7.33	8.11	-0.78	7.14e-07	1e-05	164	157.57	284.73	268.25	Promoter (<=1kb)	11	49609679	49652739	43061	1	14257	uc007iqu.2	0	ENSMUSG00000020357	Flt4	FMS-like tyrosine kinase 4	uc007iqu.2	14257	0
chr11	35975893	35986288	10396	*	7.29	6.75	7.69	-0.94	7.28e-07	1.02e-05	110	105.04	221.02	191.09	Promoter (<=1kb)	11	35839178	35980089	140912	2	211652	uc007ili.1	0	ENSMUSG00000018849	Wwc1	WW, C2 and coiled-coil domain containing 1	uc007ili.1;uc007ilj.1;uc011xtc.1	211652;211652;211652	0;0;0
chr7	4771978	4780191	8214	*	7.35	6.81	7.73	-0.92	7.28e-07	1.02e-05	112	113.06	227.12	198.32	Promoter (<=1kb)	7	4772378	4778141	5764	2	16156	uc009eyo.2	0	ENSMUSG00000004371	Il11	interleukin 11	uc009eyo.2;uc057afq.1;uc012ewx.2;uc012ewy.2;uc009eyr.1;uc009eyp.3	16156;16156;243822;243822;664968;78052	0;0;-708;-708;9369;-2749
chr4	47205329	47215897	10569	*	7.61	7.11	7.98	-0.86	7.33e-07	1.03e-05	122	154.9	259.8	244.14	Promoter (<=1kb)	4	47208012	47313165	105154	1	12819	uc008sum.1	0	ENSMUSG00000028339	Col15a1	collagen, type XV, alpha 1	uc008sum.1;uc012ddw.1	12819;12819	0;0
chr4	138247750	138268683	20934	*	8.35	7.94	8.66	-0.72	7.37e-07	1.03e-05	222	269.73	441.49	368.92	Promoter (<=1kb)	4	138250411	138301973	51563	1	16559	uc008vko.2	0	ENSMUSG00000028758	Kif17	kinesin family member 17	uc008vkg.4;uc008vkh.4;uc008vki.4;uc008vkj.4;uc008vkk.4;uc033ifz.2;uc008vkl.4;uc008vko.2;uc008vkp.1;uc008vkq.2;uc008vkr.2;uc008vkm.1;uc008vkn.1	15441;15441;15441;15441;15441;15441;15441;16559;16559;16559;16559;230863;230863	31138;31138;31138;31138;31138;31138;30623;0;0;0;0;0;0
chr4	132972063	132978545	6483	*	7.02	6.42	7.44	-1.02	7.38e-07	1.03e-05	89	81.9	178.92	167.58	Promoter (<=1kb)	4	132974095	133001893	27799	1	14191	uc012dmj.2	0	ENSMUSG00000028874	Fgr	FGR proto-oncogene, Src family tyrosine kinase	uc012dmj.2	14191	0
chr13	103330769	103345349	14581	*	7.86	7.43	8.19	-0.77	7.54e-07	1.05e-05	173	170.92	309.1	276.69	Promoter (<=1kb)	13	102732488	103334492	602005	2	328329	uc007rsb.3	0	ENSMUSG00000034751	Mast4	microtubule associated serine/threonine kinase family member 4	uc007rsb.3;uc007rse.2;uc007rsf.2	328329;328329;328329	0;0;0
chr18	66453486	66479072	25587	*	8.73	8.41	8.99	-0.58	7.71e-07	1.08e-05	334	345.4	524.03	489.48	Promoter (<=1kb)	18	66458604	66465558	6955	1	58801	uc008fft.1	0	ENSMUSG00000024521	Pmaip1	phorbol-12-myristate-13-acetate-induced protein 1	uc008fft.1	58801	0
chr18	65871804	65878281	6478	*	7.05	6.44	7.48	-1.04	7.85e-07	1.09e-05	76	97.92	173.38	183.25	Promoter (<=1kb)	18	65873486	65886596	13111	1	225642	uc008ffk.3	0	ENSMUSG00000024517	Grp	gastrin releasing peptide	uc008ffk.3	225642	0
chr5	150591501	150597049	5549	*	6.73	6.06	7.19	-1.13	8.08e-07	1.12e-05	65	68.55	147.35	144.67	Promoter (<=1kb)	5	150571643	150594525	22883	2	100637	uc009auc.2	0	ENSMUSG00000041132	N4bp2l1	NEDD4 binding protein 2-like 1	uc009auc.2;uc009aud.2;uc009aue.2	100637;100637;100637	0;0;0
chr11	52762664	52773440	10777	*	7.68	7.2	8.04	-0.84	8.11e-07	1.13e-05	131	163.8	275.31	252.58	Promoter (<=1kb)	11	52764706	53187347	422642	1	320027	uc007ivp.1	0	ENSMUSG00000036264	Fstl4	follistatin-like 4	uc007ivp.1;uc011xup.1	320027;320027	0;0
chr19	41814189	41846287	32099	*	8.95	8.65	9.2	-0.54	8.18e-07	1.14e-05	408	397.92	612.66	561.82	Promoter (<=1kb)	19	41829970	41832583	2614	1	14296	uc008hmi.2	0	ENSMUSG00000067199	Frat1	frequently rearranged in advanced T cell lymphomas	uc008hmi.2;uc008hmj.4	14296;212398	0;0
chr8	120249198	120285115	35918	*	9.21	8.94	9.43	-0.5	8.34e-07	1.16e-05	477	502.08	705.73	678.16	Distal Intergenic	8	120204434	120228230	23797	2	434353	uc009nqy.1	-20968	ENSMUSG00000097960	A330074K22Rik	RIKEN cDNA A330074K22 gene	NA	NA	NA
chr11	98540705	98563600	22896	*	8.96	8.64	9.22	-0.58	8.44e-07	1.17e-05	423	376.56	638.7	553.38	Promoter (<=1kb)	11	98464693	98546031	81339	2	22780	uc007lgm.1	0	ENSMUSG00000018168	Ikzf3	IKAROS family zinc finger 3	uc007lgm.1;uc007lgn.1;uc007lgo.2;uc007lgp.2;uc007lgq.2;uc011yec.1	22780;22780;69376;69376;69376;69376	0;0;0;0;0;0
chr5	24322788	24332974	10187	*	7.25	6.71	7.64	-0.93	8.55e-07	1.18e-05	106	103.26	207.18	191.69	Promoter (<=1kb)	5	24319589	24329591	10003	2	16511	uc008wrb.1	0	ENSMUSG00000038319	Kcnh2	potassium voltage-gated channel, subfamily H (eag-related), member 2	uc008wrb.1;uc008wrc.1	16511;16511	0;0
chr13	23382939	23413732	30794	*	9.89	9.67	10.09	-0.42	8.59e-07	1.19e-05	857	770.92	1082.41	1095.3	Exon (uc056ytf.1/75887, exon 4 of 4)	13	23313525	23385799	72275	1	75887	uc056ytf.1	69414	ENSMUSG00000087097	4930586N03Rik	RIKEN cDNA 4930586N03 gene	uc007pto.1;uc056ytf.1	30946;75887	10134;0
chr2	36187596	36219139	31544	*	8.83	8.48	9.1	-0.62	8.64e-07	1.19e-05	354	361.42	609.89	491.29	3' UTR	2	36136398	36190284	53887	1	67871	uc008jlj.3	51198	ENSMUSG00000026887	Mrrf	mitochondrial ribosome recycling factor	uc008jlj.3	67871	0
chr18	63383136	63390335	7200	*	7.29	6.76	7.68	-0.93	8.65e-07	1.19e-05	103	113.06	217.15	194.1	Promoter (<=1kb)	18	63010213	63387183	376971	2	667742	uc012bea.2	0	ENSMUSG00000041482	Piezo2	piezo-type mechanosensitive ion channel component 2	uc012bea.2;uc057kzy.1;uc029tni.1;uc008fdw.1	667742;667742;667742;667742	0;0;0;0
chr7	64500612	64507652	7041	*	6.62	5.91	7.09	-1.18	8.86e-07	1.22e-05	63	56.97	142.36	130.21	Promoter (<=1kb)	7	64501706	64753878	252173	1	11784	uc009hgj.3	0	ENSMUSG00000030519	Apba2	amyloid beta (A4) precursor protein-binding, family A, member 2	uc009hgj.3;uc057ahr.2;uc057ahs.2	11784;11784;11784	0;0;0
chr6	53281735	53300046	18312	*	8.47	8.13	8.75	-0.62	8.88e-07	1.22e-05	278	281.31	449.8	411.72	Promoter (<=1kb)	6	53287303	53391409	104107	1	231991	uc009bzd.3	0	ENSMUSG00000053007	Creb5	cAMP responsive element binding protein 5	uc009bzd.3;uc009bze.3;uc009bzf.3;uc057lqj.1	231991;231991;231991;231991	0;0;0;0
chr4	150077216	150105839	28624	*	8.57	8.24	8.84	-0.6	8.96e-07	1.23e-05	303	302.67	475.28	442.46	Promoter (<=1kb)	4	150087503	150105927	18425	1	269604	uc008vxj.1	0	ENSMUSG00000047875	Gpr157	G protein-coupled receptor 157	uc008vxj.1	269604	0
chr11	69791285	69817201	25917	*	8.5	8.15	8.78	-0.64	9.02e-07	1.24e-05	281	285.76	473.07	408.7	Promoter (<=1kb)	11	69784036	69795937	11902	2	11443	uc007jrq.2	0	ENSMUSG00000041189	Chrnb1	cholinergic receptor, nicotinic, beta polypeptide 1 (muscle)	uc007jru.1;uc007jrq.2;uc007jrr.2;uc011xxa.2;uc007jrs.2;uc007jrv.1;uc007jrt.2	108803;11443;14166;14166;380705;74288;74341	0;0;0;0;0;4964;0
chr12	104998417	105024036	25620	*	8.6	8.27	8.87	-0.6	9.09e-07	1.25e-05	305	311.57	492.46	444.27	Promoter (<=1kb)	12	104929933	104998677	68745	2	212073	uc007oxr.2	0	ENSMUSG00000054150	Syne3	spectrin repeat containing, nuclear envelope family member 3	uc007oxr.2;uc007oxs.2	212073;212073	0;0
chr7	8358028	8433792	75765	*	9.93	10.12	9.72	0.4	9.16e-07	1.26e-05	1099	1120.77	821.5	862.62	Promoter (<=1kb)	7	8367460	8383238	15779	2	434113	uc012eyh.1	0	ENSMUSG00000094098	Vmn2r44	vomeronasal 2, receptor 44	uc012eyh.1	434113	0
chr10	127165833	127171590	5758	*	6.69	5.97	7.16	-1.19	9.2e-07	1.26e-05	59	66.77	158.98	127.8	Promoter (<=1kb)	10	127165156	127168523	3368	1	14421	uc007hib.2	677	ENSMUSG00000006731	B4galnt1	beta-1,4-N-acetyl-galactosaminyl transferase 1	uc007hib.2;uc007hic.2;uc007hid.2;uc007hie.2;uc007hif.2;uc007hig.3;uc033fsy.1	14421;14421;14421;14421;14421;14421;216441	0;0;0;0;0;0;0
chr7	62374200	62436025	61826	*	10.08	9.88	10.26	-0.38	9.21e-07	1.26e-05	950	937.39	1224.77	1229.12	Promoter (<=1kb)	7	62417593	62420139	2547	2	22652	uc009hfi.1	0	ENSMUSG00000070527	Mkrn3	makorin, ring finger protein, 3	uc009hfi.1;uc009hfh.2	22652;27385	0;0
chr1	178527528	178541687	14160	*	7.89	7.47	8.22	-0.75	9.24e-07	1.26e-05	177	178.04	311.32	285.13	Promoter (<=1kb)	1	178529125	178716500	187376	1	269152	uc007dvf.1	0	ENSMUSG00000026494	Kif26b	kinesin family member 26B	uc007dvf.1;uc007dvh.2	269152;269152	0;0
chr17	36935881	36949924	14044	*	7.82	7.39	8.15	-0.76	9.35e-07	1.28e-05	164	170.92	291.37	276.69	Promoter (<=1kb)	17	36943051	36947986	4936	1	386454	uc008clm.1	0	ENSMUSG00000036492	Rnf39	ring finger protein 39	uc008clm.1;uc008clo.1;uc008clp.1;uc029thp.1;uc008cln.2	386454;66136;66136;73286;76497	0;8504;8561;12089;0
chr2	155772470	155792008	19539	*	8.22	7.84	8.52	-0.67	9.39e-07	1.28e-05	230	229.67	381.67	350.83	Promoter (<=1kb)	2	155775342	155818366	43025	1	17391	uc008nlj.2	0	ENSMUSG00000027612	Mmp24	matrix metallopeptidase 24	uc008nlj.2	17391	0
chr4	3050001	3091524	41524	*	11.15	11.28	10.99	0.29	9.5e-07	1.29e-05	2427	2553.12	1976.47	2101.99	Distal Intergenic	4	3172083	3173003	921	1	100312470	uc012dad.1	-80559	ENSMUSG00000115072	Vmn1r2	vomeronasal 1 receptor 2	NA	NA	NA
chr9	57500134	57506461	6328	*	7.03	6.43	7.45	-1.02	9.6e-07	1.31e-05	79	93.47	185.02	165.77	Promoter (<=1kb)	9	57504102	57505447	1346	1	102614	uc009puy.1	0	ENSMUSG00000062309	Rpp25	ribonuclease P/MRP 25 subunit	uc009puy.1	102614	0
chr6	119538457	119551392	12936	*	7.53	7.04	7.9	-0.86	9.67e-07	1.31e-05	137	126.41	256.48	221.23	Promoter (<=1kb)	6	119432531	119544347	111817	2	22419	uc009dmi.2	0	ENSMUSG00000030170	Wnt5b	wingless-type MMTV integration site family, member 5B	uc009dmi.2	22419	0
chr2	127648534	127658625	10092	*	7.53	7.05	7.89	-0.84	9.69e-07	1.32e-05	128	136.2	243.74	229.67	Promoter (<=1kb)	2	127633226	127656695	23470	2	17153	uc008mfv.2	0	ENSMUSG00000027375	Mal	myelin and lymphocyte protein, T cell differentiation protein	uc008mfv.2;uc008mfw.2	17153;17153	0;0
chr2	118669294	118688829	19536	*	8.23	7.84	8.54	-0.7	9.87e-07	1.34e-05	240	217.21	402.72	341.19	Promoter (<=1kb)	2	118677246	118698020	20775	1	214230	uc008lsg.2	0	ENSMUSG00000074923	Pak6	p21 (RAC1) activated kinase 6	uc008lsf.2;uc008lsg.2	214230;214230	0;0
chr10	43005467	43024351	18885	*	8.44	8.09	8.73	-0.64	9.88e-07	1.34e-05	264	281.31	446.48	400.87	3' UTR	10	43002500	43174530	172031	2	109205	uc007ezf.1	150179	ENSMUSG00000038248	Sobp	sine oculis binding protein	uc007ezf.1;uc007ezg.1	109205;109205	0;0
chr1	180934624	180943781	9158	*	7.19	6.61	7.6	-0.98	9.95e-07	1.35e-05	106	89.91	211.05	176.02	Promoter (<=1kb)	1	180935039	180938401	3363	1	13590	uc007dww.1	0	ENSMUSG00000038793	Lefty1	left right determination factor 1	uc007dww.1;uc007dwx.1;uc007dwy.1	13590;208795;208795	0;0;-301
chr2	149823846	149833623	9778	*	7.61	7.13	7.98	-0.85	1.01e-06	1.37e-05	129	150.45	270.32	233.29	Promoter (<=1kb)	2	149830783	150004392	173610	1	433485	uc012cfp.1	0	ENSMUSG00000074736	Syndig1	synapse differentiation inducing 1	uc012cfp.1	433485	0
chr7	44473940	44487359	13420	*	7.8	7.36	8.13	-0.77	1.02e-06	1.37e-05	171	157.57	291.93	268.85	Promoter (<=1kb)	7	44484517	44485413	897	1	71368	uc009gpo.3	0	ENSMUSG00000108322	5430431A17Rik	RIKEN cDNA 5430431A17 gene	uc033iza.1;uc009gpl.2;uc009gpm.2;uc009gpn.2;uc029wfd.1;uc029wfe.1;uc029wff.1;uc009gpq.2;uc012fjp.1;uc009gpo.3	102465637;66124;66124;66124;66124;66124;66124;69683;69683;71368	3593;5960;5960;5960;5960;5960;5960;9154;9154;0
chr18	15059646	15071312	11667	*	7.87	7.43	8.22	-0.79	1.02e-06	1.37e-05	190	154.01	317.41	277.29	Promoter (<=1kb)	18	14968685	15063582	94898	2	106931	uc008edn.2	0	ENSMUSG00000036225	Kctd1	potassium channel tetramerisation domain containing 1	uc008edn.2;uc008edo.1;uc008edp.2	106931;106931;106931	0;0;0
chr12	31543403	31564364	20962	*	8.55	8.21	8.83	-0.62	1.03e-06	1.39e-05	296	297.33	483.04	426.18	Promoter (<=1kb)	12	31519819	31559969	40151	2	23985	uc007nho.1	0	ENSMUSG00000020651	Slc26a4	solute carrier family 26, member 4	uc007nho.1	23985	0
chr8	13484964	13501566	16603	*	7.91	7.49	8.23	-0.74	1.05e-06	1.41e-05	175	185.16	302.45	297.18	Promoter (<=1kb)	8	13465374	13494535	29162	2	14456	uc009kya.1	0	ENSMUSG00000031451	Gas6	growth arrest specific 6	uc009kya.1	14456	0
chr4	148805030	148813754	8725	*	7.07	6.48	7.49	-1	1.07e-06	1.43e-05	83	96.14	189.45	169.39	Promoter (<=1kb)	4	148804392	148891936	87545	1	69743	uc008vvk.1	638	ENSMUSG00000028977	Casz1	castor zinc finger 1	uc008vvk.1;uc008vvl.1;uc008vvn.2	69743;69743;69743	0;0;0
chr2	181665584	181681325	15742	*	8.1	7.7	8.42	-0.72	1.11e-06	1.49e-05	226	190.5	359.51	324.91	Promoter (<=1kb)	2	181669837	181671640	1804	2	20672	uc008ona.1	0	ENSMUSG00000046470	Sox18	SRY (sex determining region Y)-box 18	uc008ona.1;uc012cmu.2	20672;21400	0;0
chr17	24744493	24758535	14043	*	7.8	7.37	8.13	-0.76	1.12e-06	1.5e-05	163	168.25	279.74	280.31	Promoter (<=1kb)	17	24753003	24758684	5682	1	328779	uc008ayj.1	0	ENSMUSG00000039628	Hs3st6	heparan sulfate (glucosamine) 3-O-sulfotransferase 6	uc008ayh.1;uc008ayi.1;uc008ayj.1;uc012amr.1	27361;27361;328779;328779	7851;7851;0;0
chr15	98672849	98681372	8524	*	7.3	6.76	7.69	-0.92	1.12e-06	1.51e-05	106	111.28	221.58	190.49	Promoter (<=1kb)	15	98663421	98677461	14041	2	223881	uc007xnh.1	0	ENSMUSG00000054855	Rnd1	Rho family GTPase 1	uc007xnh.1;uc007xni.1;uc007xnj.1	223881;223881;223881	0;0;0
chr8	26958167	27025590	67424	*	10.35	10.16	10.53	-0.37	1.12e-06	1.51e-05	1126	1154.6	1544.4	1405.14	Promoter (<=1kb)	8	27023799	27039437	15639	1	244373	uc009lhr.3	0	ENSMUSG00000031483	Erlin2	ER lipid raft associated 2	uc009lhr.3;uc012gbp.1;uc012gbq.1	244373;353310;353310	0;0;0
chr1	172049655	172056407	6753	*	7.08	6.5	7.49	-0.99	1.13e-06	1.52e-05	100	81.01	186.13	174.21	Promoter (1-2kb)	1	172052292	172057596	5305	2	18071	uc007dpj.2	1189	ENSMUSG00000051251	Nhlh1	nescient helix loop helix 1	uc007dpj.2	18071	0
chr5	37158347	37166514	8168	*	6.96	6.36	7.39	-1.03	1.16e-06	1.55e-05	77	87.24	163.41	171.2	Distal Intergenic	5	37242058	37292163	50106	1	12933	uc008xfl.2	-75544	ENSMUSG00000029121	Crmp1	collapsin response mediator protein 1	NA	NA	NA
chr2	156605128	156616976	11849	*	7.47	6.98	7.84	-0.86	1.16e-06	1.55e-05	126	126.41	241.52	215.8	Promoter (<=1kb)	2	156609198	156613422	4225	2	100504350	uc029uhs.1	0	ENSMUSG00000086118	Gm14169	predicted gene 14169	uc029uhs.1;uc008nnr.2;uc012chu.2;uc012chv.2	100504350;228836;228836;228836	0;0;0;0
chr5	114563508	114574146	10639	*	7.34	6.82	7.73	-0.91	1.16e-06	1.55e-05	105	121.07	222.13	201.34	Promoter (<=1kb)	5	114568251	114613218	44968	1	433940	uc008yzt.1	0	ENSMUSG00000041930	Fam222a	family with sequence similarity 222, member A	uc008yzt.1	433940	0
chr12	53231790	53268401	36612	*	9.44	9.19	9.66	-0.47	1.18e-06	1.58e-05	616	551.93	826.49	792.69	Promoter (<=1kb)	12	53248677	54072175	823499	1	27386	uc007nno.1	0	ENSMUSG00000021010	Npas3	neuronal PAS domain protein 3	uc007nno.1;uc007nnp.1;uc033gdn.1	27386;27386;27386	0;0;0
chr11	101077806	101081593	3788	*	6.69	6.02	7.15	-1.13	1.21e-06	1.61e-05	64	65.88	147.35	136.84	Promoter (<=1kb)	11	101078411	101080505	2095	1	15485	uc007lnb.1	0	ENSMUSG00000019301	Hsd17b1	hydroxysteroid (17-beta) dehydrogenase 1	uc007lnb.1;uc007lmz.3;uc007lna.3;uc007lnc.2;uc007lnd.2	15485;27419;27419;71743;71743	0;7929;7712;-972;-1023
chr2	152043985	152064303	20319	*	8.27	7.89	8.57	-0.68	1.22e-06	1.62e-05	218	256.38	392.75	365.3	Distal Intergenic	2	152081529	152095802	14274	1	545474	uc012cgb.1	-17226	ENSMUSG00000060257	Scrt2	scratch family zinc finger 2	NA	NA	NA
chr9	31129020	31138570	9551	*	7.51	7.01	7.87	-0.86	1.22e-06	1.62e-05	117	141.54	238.2	230.27	Promoter (<=1kb)	9	31088590	31131799	43210	2	19143	uc009ori.1	0	ENSMUSG00000031995	St14	suppression of tumorigenicity 14 (colon carcinoma)	uc009ori.1	19143	0
chr11	66518522	66530385	11864	*	7.83	7.36	8.18	-0.83	1.25e-06	1.66e-05	155	172.7	326.83	254.38	Promoter (<=1kb)	11	66211725	66526126	314402	2	380702	uc007jlm.2	0	ENSMUSG00000053930	Shisa6	shisa family member 6	uc007jlm.2;uc057klh.1	380702;380702	0;0
chr8	88790197	88954232	164036	*	11.46	11.33	11.58	-0.25	1.25e-06	1.66e-05	2525	2629.68	3125.35	3009.81	Distal Intergenic	8	88729459	88737240	7782	1	74256	uc009mry.1	60738	ENSMUSG00000036712	Cyld	CYLD lysine 63 deubiquitinase	NA	NA	NA
chr10	127047655	127052210	4556	*	6.93	6.24	7.4	-1.16	1.26e-06	1.66e-05	65	86.35	196.1	141.06	Promoter (<=1kb)	10	127048246	127053006	4761	1	13115	uc007hhs.2	0	ENSMUSG00000006724	Cyp27b1	cytochrome P450, family 27, subfamily b, polypeptide 1	uc007hhs.2;uc007hht.2;uc007hhp.1;uc007hhq.1;uc007hhr.1;uc007hhu.1	13115;13115;17299;17299;17299;216438	0;0;5723;5723;5723;7974
chr7	63749687	63761198	11512	*	7.82	7.11	8.29	-1.17	1.27e-06	1.68e-05	116	161.13	334.03	290.55	3' UTR	7	63444772	63759027	314256	1	170711	uc009hfl.1	304915	ENSMUSG00000033510	Otud7a	OTU domain containing 7A	uc009hfl.1	170711	0
chr19	45292896	45305414	12519	*	7.67	7.22	8.01	-0.79	1.29e-06	1.7e-05	146	153.12	255.92	260.41	Distal Intergenic	19	45233728	45235236	1509	2	16814	uc008hqv.1	-57660	ENSMUSG00000025216	Lbx1	ladybird homeobox 1	NA	NA	NA
chr15	97902894	97917395	14502	*	7.86	7.43	8.18	-0.75	1.29e-06	1.71e-05	175	170.92	302.45	277.89	Promoter (<=1kb)	15	97854427	97908296	53870	2	22337	uc007xlk.1	0	ENSMUSG00000022479	Vdr	vitamin D (1,25-dihydroxyvitamin D3) receptor	uc007xlk.1	22337	0
chr11	79588471	79597816	9346	*	7.29	6.74	7.69	-0.94	1.33e-06	1.75e-05	101	113.06	226.56	185.06	Promoter (<=1kb)	11	79591212	79694012	102801	1	268451	uc007kku.1	0	ENSMUSG00000017639	Rab11fip4	RAB11 family interacting protein 4 (class II)	uc007kku.1	268451	0
chr8	92817861	93045257	227397	*	12.04	11.94	12.14	-0.2	1.38e-06	1.82e-05	3898	3948.08	4546.78	4461.97	Promoter (<=1kb)	8	92827297	92853421	26125	1	17390	uc009mue.2	0	ENSMUSG00000031740	Mmp2	matrix metallopeptidase 2	uc009mue.2;uc009muh.2;uc009muj.2;uc009muf.1;uc009mug.1;uc012gii.1;uc012gij.1;uc012gik.1	17390;20538;244595;270084;270084;270084;270084;69543	0;0;0;0;0;0;0;0
chr4	131914374	131923946	9573	*	6.93	6.29	7.37	-1.07	1.39e-06	1.84e-05	74	82.79	183.36	146.48	Promoter (<=1kb)	4	131899478	131920029	20552	2	545681	uc008vai.2	0	ENSMUSG00000085667	Gm12992	predicted gene 12992	uc008vak.4;uc008val.4;uc008vam.4;uc012dma.3;uc008van.4;uc012dmb.1;uc056zxk.1;uc056zxl.1;uc012dmc.1;uc008vai.2;uc033iey.1;uc012dlz.1	269587;269587;269587;269587;269587;269587;269587;269587;269587;545681;545681;623230	0;0;0;0;0;33873;79848;79848;83492;0;0;0
chr8	94868716	94902661	33946	*	9.29	9.03	9.51	-0.48	1.41e-06	1.86e-05	506	540.36	731.76	724.57	Promoter (<=1kb)	8	94863828	94871157	7330	2	114255	uc009mxf.2	0	ENSMUSG00000040631	Dok4	docking protein 4	uc009mxf.2;uc009mxg.2;uc009mxe.3;uc009mxh.2	114255;114255;20021;234582	0;0;11266;0
chr12	75722897	75786172	63276	*	9.94	9.74	10.13	-0.39	1.42e-06	1.87e-05	844	860.83	1134.48	1100.72	Promoter (<=1kb)	12	75714248	75735729	21482	2	81535	uc007nxk.2	0	ENSMUSG00000021054	Sgpp1	sphingosine-1-phosphate phosphatase 1	uc007nxk.2;uc007nxl.2	81535;81535	0;0
chr7	19483300	19495884	12585	*	7.7	7.22	8.06	-0.84	1.44e-06	1.89e-05	138	160.24	293.04	239.31	5' UTR	7	19505804	19508331	2528	2	232946	uc009fma.1	12447	ENSMUSG00000057667	Bloc1s3	biogenesis of lysosomal organelles complex-1, subunit 3	NA	NA	NA
chr12	106471063	106487758	16696	*	8.2	7.82	8.5	-0.68	1.44e-06	1.89e-05	215	236.8	381.11	342.39	Distal Intergenic	12	106442652	106447666	5015	2	76639	uc011yrn.1	-23397	ENSMUSG00000092066	1700121N20Rik	RIKEN cDNA 1700121N20 gene	NA	NA	NA
chr14	33920231	33933546	13316	*	7.85	7.41	8.18	-0.78	1.49e-06	1.95e-05	177	162.02	316.3	264.63	Promoter (<=1kb)	14	33923587	33935285	11699	1	14560	uc007tab.2	0	ENSMUSG00000021943	Gdf10	growth differentiation factor 10	uc007tab.2	14560	0
chr12	112796539	112803444	6906	*	6.57	5.85	7.05	-1.19	1.51e-06	1.97e-05	54	61.42	141.26	122.97	5' UTR	12	112808975	112816245	7271	1	217887	uc007pfg.1	-5531	ENSMUSG00000037594	Clba1	clathrin binding box of aftiphilin containing 1	NA	NA	NA
chr8	51000784	51127607	126824	*	11.38	11.5	11.24	0.25	1.51e-06	1.97e-05	2967	2822.85	2396.92	2456.44	Distal Intergenic	8	50368112	50416089	47978	1	100039954	uc029wsx.1	632672	ENSMUSG00000110281	Gm2516	predicted gene 2516	NA	NA	NA
chr1	125901255	125919819	18565	*	8.41	8.06	8.68	-0.62	1.53e-06	1.99e-05	273	261.72	428.2	394.24	Promoter (<=1kb)	1	125867622	125911387	43766	2	72585	uc007cki.2	0	ENSMUSG00000026344	Lypd1	Ly6/Plaur domain containing 1	uc011wqy.1;uc007ckk.1;uc007ckl.1;uc007ckm.1;uc007ckn.1;uc007cki.2;uc007ckj.2;uc057avj.1	210356;210356;210356;210356;210356;72585;72585;72585	0;0;0;0;0;0;0;0
chr11	72259866	72271435	11570	*	7.52	7.04	7.87	-0.83	1.56e-06	2.04e-05	138	125.52	244.84	224.24	Promoter (<=1kb)	11	72241994	72266604	24611	2	237831	uc007jym.2	0	ENSMUSG00000020805	Slc13a5	solute carrier family 13 (sodium-dependent citrate transporter), member 5	uc007jym.2;uc007jyn.1;uc007jyo.2	237831;237831;73366	0;0;0
chr18	38622978	38647481	24504	*	8.74	8.42	9	-0.58	1.57e-06	2.04e-05	341	342.73	546.19	475.61	3' UTR	18	38586265	38601268	15004	2	24066	uc008esl.1	-21710	ENSMUSG00000024427	Spry4	sprouty RTK signaling antagonist 4	NA	NA	NA
chr7	127943102	127947727	4626	*	6.46	5.72	6.95	-1.22	1.6e-06	2.08e-05	55	50.74	120.76	125.99	Promoter (<=1kb)	7	127932638	127946089	13452	2	77613	uc057lvf.1	0	ENSMUSG00000070371	Prss36	protease, serine 36	uc057lvf.1;uc057cba.1	77613;77613	0;0
chr9	107704320	107724980	20661	*	8.18	7.81	8.47	-0.66	1.64e-06	2.13e-05	229	218.99	362.83	345.41	Promoter (<=1kb)	9	107681502	107705591	24090	2	20350	uc009rms.1	0	ENSMUSG00000034684	Sema3f	sema domain, immunoglobulin domain (Ig), short basic domain, secreted, (semaphorin) 3F	uc009rms.1;uc009rmt.1;uc009rmu.1	20350;20350;20350	0;0;0
chr7	27403016	27411127	8112	*	7.4	6.91	7.77	-0.85	1.64e-06	2.13e-05	119	121.96	222.13	213.39	Promoter (<=1kb)	7	27356383	27409176	52794	2	80297	uc009fwb.1	0	ENSMUSG00000011751	Sptbn4	spectrin beta, non-erythrocytic 4	uc009fwb.1;uc009fwc.1	80297;80297	0;0
chr1	172558128	172580501	22374	*	8.43	8.1	8.71	-0.61	1.64e-06	2.13e-05	287	259.94	427.09	409.31	Promoter (<=1kb)	1	172559906	172563717	3812	1	240916	uc007dqt.2	0	ENSMUSG00000049598	Vsig8	V-set and immunoglobulin domain containing 8	uc007dqs.2;uc007dqt.2;uc007dqu.1	240916;240916;74748	0;0;10067
chr17	57273117	57280950	7834	*	7.18	6.65	7.57	-0.92	1.66e-06	2.15e-05	98	102.37	190	189.88	Promoter (<=1kb)	17	57279100	57329236	50137	1	22324	uc008den.2	0	ENSMUSG00000034116	Vav1	vav 1 oncogene	uc008den.2;uc008dep.2;uc008deq.2	22324;22324;22324	0;0;0
chr6	91404075	91426525	22451	*	8.56	8.24	8.83	-0.58	1.66e-06	2.15e-05	299	306.23	465.87	441.25	Promoter (<=1kb)	6	91363983	91411369	47387	2	22421	uc009cxz.1	0	ENSMUSG00000030093	Wnt7a	wingless-type MMTV integration site family, member 7A	uc009cxz.1;uc029vxr.1	22421;75787	0;14329
chr3	104958507	104973892	15386	*	8.14	7.73	8.46	-0.73	1.67e-06	2.16e-05	198	226.11	384.99	317.08	Promoter (<=1kb)	3	104944805	104961709	16905	2	22414	uc008qut.1	0	ENSMUSG00000027840	Wnt2b	wingless-type MMTV integration site family, member 2B	uc008qut.1	22414	0
chr19	48202413	48216105	13693	*	7.86	7.41	8.2	-0.79	1.68e-06	2.17e-05	160	180.71	325.17	264.03	Promoter (<=1kb)	19	48206025	48805505	599481	1	66673	uc008hvx.1	0	ENSMUSG00000063434	Sorcs3	sortilin-related VPS10 domain containing receptor 3	uc008hvx.1	66673	0
chr5	136564287	136587124	22838	*	8.52	8.19	8.79	-0.6	1.7e-06	2.2e-05	298	284.87	461.99	421.36	Promoter (<=1kb)	5	136248135	136565981	317847	2	13047	uc009aaj.2	0	ENSMUSG00000029705	Cux1	cut-like homeobox 1	uc009aaj.2;uc009aak.2;uc009aal.2;uc009aam.2;uc009aaq.2;uc009aar.2;uc009aas.2;uc009aat.2	13047;13047;13047;13047;13047;13047;13047;13047	0;0;0;0;0;0;0;0
chr8	123320659	123356100	35442	*	9.4	9.15	9.61	-0.47	1.7e-06	2.2e-05	558	575.97	816.51	751.1	Promoter (<=1kb)	8	123332713	123369518	36806	1	234857	uc009nvj.1	0	ENSMUSG00000010154	Spire2	spire type actin nucleation factor 2	uc009nve.2;uc009nvf.1;uc009nvh.1;uc009nvi.1;uc009nvj.1;uc009nvk.1	14087;14087;14087;14087;234857;234857	-2083;-2083;-2083;-2083;0;0
chr1	135100206	135108414	8209	*	6.9	6.3	7.33	-1.03	1.71e-06	2.21e-05	77	80.12	169.51	151.91	Promoter (<=1kb)	1	134986353	135105276	118924	2	329252	uc007csq.1	0	ENSMUSG00000042793	Lgr6	leucine-rich repeat-containing G protein-coupled receptor 6	uc007csr.2;uc007csq.1	13924;329252	24161;0
chr9	114975730	114980894	5165	*	6.48	5.75	6.96	-1.21	1.73e-06	2.23e-05	54	53.41	122.42	125.99	Distal Intergenic	9	115016663	115232223	215561	1	74486	uc009ryl.1	-35769	ENSMUSG00000040875	Osbpl10	oxysterol binding protein-like 10	NA	NA	NA
chr13	69735685	69747688	12004	*	7.56	7.1	7.91	-0.81	1.73e-06	2.23e-05	144	129.97	244.84	235.7	Promoter (<=1kb)	13	69702832	69739897	37066	2	76980	uc007rcp.2	0	ENSMUSG00000052981	Ube2ql1	ubiquitin-conjugating enzyme E2Q family-like 1	uc007rcp.2	76980	0
chr18	74956315	74968063	11749	*	7.65	7.2	8	-0.8	1.76e-06	2.27e-05	150	144.21	271.99	239.31	Promoter (<=1kb)	18	74939322	74961263	21942	2	16891	uc008fpu.2	0	ENSMUSG00000053846	Lipg	lipase, endothelial	uc008fpu.2;uc008fpv.2;uc033hhz.1	16891;16891;71545	0;0;13484
chr4	127223750	127241920	18171	*	8.05	7.65	8.36	-0.71	1.8e-06	2.31e-05	192	210.09	345.66	309.84	3' UTR	4	127169204	127237022	67819	1	242667	uc008uuo.3	54546	ENSMUSG00000042388	Dlgap3	DLG associated protein 3	uc008uuo.3;uc008uup.2;uc008uuq.1	242667;242667;80284	0;0;-1864
chr19	34465657	34480703	15047	*	8.05	7.66	8.36	-0.7	1.8e-06	2.31e-05	200	204.75	345.66	310.45	Promoter (<=1kb)	19	34473783	34475135	1353	2	12642	uc008hgj.2	0	ENSMUSG00000050370	Ch25h	cholesterol 25-hydroxylase	uc008hgj.2	12642	0
chr14	69163463	69179122	15660	*	8.12	7.73	8.42	-0.68	1.84e-06	2.36e-05	203	222.55	356.19	327.32	Promoter (<=1kb)	14	69171802	69175540	3739	1	18092	uc007umc.2	0	ENSMUSG00000044186	Nkx2-6	NK2 homeobox 6	uc007umc.2;uc007umb.2;uc007uma.1	18092;18092;73554	0;0;0
chr8	88326957	88500275	173319	*	11.65	11.53	11.77	-0.24	1.85e-06	2.37e-05	2847	3051.64	3518.66	3445.04	Promoter (<=1kb)	8	88332311	88335487	3177	2	26992	uc009mrm.1	0	ENSMUSG00000031660	Brd7	bromodomain containing 7	uc009mrh.2;uc009mri.2;uc009mrj.2;uc009mrk.2;uc009mrl.1;uc009mrm.1;uc009mrn.2	11513;11513;11513;11513;11513;26992;26992	0;0;0;0;0;0;0
chr1	72532659	72540518	7860	*	7.11	6.55	7.52	-0.97	1.88e-06	2.41e-05	91	96.14	199.97	166.98	Promoter (<=1kb)	1	72427112	72536564	109453	2	381270	uc007bkn.1	0	ENSMUSG00000039372	2020-03-04	membrane-associated ring finger (C3HC4) 4	uc007bkn.1	381270	0
chr18	80358136	80371923	13788	*	7.82	7.4	8.14	-0.74	1.91e-06	2.44e-05	168	170.92	288.05	276.69	Promoter (<=1kb)	18	80294544	80364254	69711	2	240444	uc012bfj.1	0	ENSMUSG00000059852	Kcng2	potassium voltage-gated channel, subfamily G, member 2	uc012bfj.1	240444	0
chr3	89814953	89835396	20444	*	8.43	8.07	8.72	-0.64	1.91e-06	2.44e-05	289	249.26	449.8	391.22	Promoter (<=1kb)	3	89831370	89858846	27477	1	214547	uc008qae.2	0	ENSMUSG00000046280	She	src homology 2 domain-containing transforming protein E	uc008qae.2	214547	0
chr6	38653823	38676657	22835	*	8.34	7.97	8.64	-0.66	1.93e-06	2.45e-05	224	278.64	407.7	388.21	Promoter (<=1kb)	6	38663069	38680865	17797	1	665180	uc029vuf.1	0	ENSMUSG00000079598	Clec2l	C-type lectin domain family 2, member L	uc029vuf.1	665180	0
chr12	75811853	75824372	12520	*	7.83	7.4	8.17	-0.77	1.93e-06	2.46e-05	184	154.01	305.78	269.45	Promoter (<=1kb)	12	75818318	75891049	72732	1	319565	uc007nxm.1	0	ENSMUSG00000063450	Syne2	spectrin repeat containing, nuclear envelope 2	uc007nxm.1;uc007nxn.1;uc011ynv.1;uc007nxo.1;uc007nxp.1	319565;319565;319565;319565;319565	0;0;0;0;0
chr8	46085773	46345143	259371	*	12.35	12.25	12.45	-0.19	1.95e-06	2.48e-05	4792	4961.14	5721.69	5433.1	Promoter (<=1kb)	8	46033261	46116702	83442	2	102141	uc009lpu.2	0	ENSMUSG00000038291	Snx25	sorting nexin 25	uc009lpu.2;uc012gdj.1;uc009lpz.3;uc009lqa.1;uc009lqc.2;uc009lqd.2;uc009lpv.1;uc009lpw.1;uc009lpx.1;uc009lpy.1	102141;102141;11739;11739;234219;234219;66756;66756;66756;66756	0;0;0;0;0;0;0;0;0;0
chr13	96917470	96928607	11138	*	7.77	7.34	8.09	-0.75	1.95e-06	2.48e-05	157	167.36	280.3	266.44	Promoter (<=1kb)	13	96924689	96950914	26226	1	218476	uc007rno.2	0	ENSMUSG00000091387	Gcnt4	glucosaminyl (N-acetyl) transferase 4, core 2 (beta-1,6-N-acetylglucosaminyltransferase)	uc007rno.2	218476	0
chr17	31634126	31641302	7177	*	7.09	6.53	7.49	-0.96	1.95e-06	2.48e-05	94	90.8	187.79	170.59	Promoter (<=1kb)	17	31612623	31637205	24583	2	12411	uc008bvl.2	0	ENSMUSG00000024039	Cbs	cystathionine beta-synthase	uc008bvl.2;uc008bvm.2;uc008bvn.2	12411;12411;12411	0;0;0
chr6	42320767	42335922	15156	*	8.06	7.68	8.36	-0.69	1.99e-06	2.53e-05	200	209.2	344	315.27	Promoter (<=1kb)	6	42315305	42324640	9336	2	76156	uc009bqu.3	0	ENSMUSG00000029861	Fam131b	family with sequence similarity 131, member B	uc009bqu.3;uc009bqv.3;uc033ipo.1	76156;76156;76156	0;0;0
chr15	64894946	64939039	44094	*	9.46	9.22	9.67	-0.45	1.99e-06	2.53e-05	599	590.21	838.67	785.46	Promoter (<=1kb)	15	64699035	64922296	223262	2	11514	uc007vzo.1	0	ENSMUSG00000022376	Adcy8	adenylate cyclase 8	uc007vzo.1;uc011ztk.1;uc007vzp.1	11514;11514;11514	0;0;0
chr14	122446928	122454399	7472	*	7.3	6.77	7.68	-0.91	2.07e-06	2.62e-05	101	117.51	218.81	191.09	Promoter (<=1kb)	14	122365679	122451146	85468	2	328479	uc011zqj.1	0	ENSMUSG00000064052	Gm5089	predicted gene 5089	uc011zqj.1;uc007vba.2;uc007vbb.2	328479;328479;65100	0;0;0
chr8	119978544	120029036	50493	*	9.78	9.56	9.97	-0.41	2.1e-06	2.65e-05	745	765.58	1034.21	972.93	Promoter (<=1kb)	8	119992438	120052794	60357	1	78892	uc012glu.2	0	ENSMUSG00000031825	Crispld2	cysteine-rich secretory protein LCCL domain containing 2	uc012glu.2;uc012glv.2;uc009nqq.3	78892;78892;78892	0;0;0
chr5	141238383	141270888	32506	*	9.12	8.86	9.34	-0.49	2.14e-06	2.7e-05	473	454.9	648.67	651.03	Promoter (<=1kb)	5	141241534	142213791	972258	1	330222	uc009ail.2	0	ENSMUSG00000039683	Sdk1	sidekick cell adhesion molecule 1	uc009ail.2	330222	0
chr10	75552707	75568462	15756	*	7.96	7.56	8.27	-0.71	2.17e-06	2.74e-05	179	198.52	297.47	321.9	Promoter (<=1kb)	10	75550125	75560330	10206	2	192734	uc029qyw.1	0	ENSMUSG00000046807	Lrrc75b	leucine rich repeat containing 75B	uc007fqo.3;uc029qyw.1	14598;192734	-200;0
chr8	9767113	9774672	7560	*	7.42	6.92	7.79	-0.87	2.18e-06	2.74e-05	121	121.07	239.3	201.94	Promoter (<=1kb)	8	9206010	9771023	565014	2	270028	uc009kuj.1	0	ENSMUSG00000079157	Fam155a	family with sequence similarity 155, member A	uc009kuj.1;uc009kuk.1;uc057lwf.1	270028;270028;270028	0;0;0
chr8	84592408	84649257	56850	*	9.88	9.66	10.07	-0.41	2.18e-06	2.75e-05	792	822.55	1129.49	1021.15	Promoter (<=1kb)	8	84601389	84634524	33136	1	12286	uc009mmq.1	0	ENSMUSG00000034656	Cacna1a	calcium channel, voltage-dependent, P/Q type, alpha 1A subunit	uc009mmn.2;uc012ghk.2;uc029wuc.1;uc029wud.1;uc009mmq.1	12286;12286;12286;12286;12286	0;0;0;0;0
chr8	11720663	11731196	10534	*	7.52	7.06	7.87	-0.81	2.21e-06	2.78e-05	137	129.08	238.2	228.46	Promoter (<=1kb)	8	11728105	11823061	94957	1	54126	uc009kvu.2	0	ENSMUSG00000031511	Arhgef7	Rho guanine nucleotide exchange factor (GEF7)	uc009kvu.2;uc009kvv.2	54126;54126	0;0
chr2	174315914	174328840	12927	*	7.72	7.29	8.06	-0.77	2.23e-06	2.81e-05	166	145.99	280.85	252.58	Promoter (<=1kb)	2	174327768	174328846	1079	1	14683	uc008oex.2	0	ENSMUSG00000027523	Gnas	GNAS (guanine nucleotide binding protein, alpha stimulating) complex locus	uc008oer.2;uc008oes.2;uc008oeu.3;uc008oew.3;uc033hrq.2;uc008oex.2;uc008oey.3;uc033hrr.3;uc033hrs.2;uc057lez.1	14683;14683;14683;14683;14683;14683;14683;14683;14683;14683	0;0;0;0;0;0;0;0;0;0
chr7	27652899	27662510	9612	*	7.39	6.91	7.75	-0.85	2.25e-06	2.83e-05	124	115.73	221.58	209.78	Promoter (<=1kb)	7	27653924	27656207	2284	1	73032	uc009fwu.1	0	ENSMUSG00000007944	Ttc9b	tetratricopeptide repeat domain 9B	uc009fwv.2;uc009fwu.1	269881;73032	0;0
chr7	30334161	30350152	15992	*	8.01	7.62	8.32	-0.71	2.27e-06	2.85e-05	184	208.31	335.69	305.02	Distal Intergenic	7	30321409	30322375	967	2	68332	uc009ged.1	-11786	ENSMUSG00000074211	Sdhaf1	succinate dehydrogenase complex assembly factor 1	NA	NA	NA
chr19	4679632	4715807	36176	*	9.46	9.21	9.68	-0.47	2.27e-06	2.85e-05	589	596.44	872.46	768.58	Promoter (<=1kb)	19	4711223	4752352	41130	1	20743	uc008gan.1	0	ENSMUSG00000067889	Sptbn2	spectrin beta, non-erythrocytic 2	uc008gan.1;uc008gao.1;uc033hik.1;uc008gam.2	20743;20743;381196;381196	0;0;0;0
chr6	126161599	126169640	8042	*	7.01	6.44	7.42	-0.98	2.27e-06	2.85e-05	85	89.02	178.92	163.36	Promoter (<=1kb)	6	126101412	126164960	63549	2	18205	uc009duz.2	0	ENSMUSG00000049107	Ntf3	neurotrophin 3	uc009duz.2;uc012esx.1;uc012esy.1	18205;18205;18205	0;0;0
chr8	92593479	92817717	224239	*	12.09	11.99	12.18	-0.19	2.34e-06	2.92e-05	3999	4122.56	4661.44	4627.14	Promoter (<=1kb)	8	92674289	92680956	6668	1	64379	uc009muc.2	0	ENSMUSG00000031738	Irx6	Iroquois homeobox 6	uc009muc.2;uc009mud.2	64379;64379	0;0
chr18	25745606	25761380	15775	*	8.09	7.71	8.38	-0.68	2.34e-06	2.93e-05	223	194.96	335.14	333.35	Promoter (<=1kb)	18	25477620	25753983	276364	2	108013	uc008ehk.2	0	ENSMUSG00000024268	Celf4	CUGBP, Elav-like family member 4	uc008ehk.2;uc008ehl.2;uc012ban.1;uc012bao.1;uc012bap.1;uc012baq.1	108013;108013;108013;108013;108013;108013	0;0;0;0;0;0
chr2	118366776	118382190	15415	*	8.25	7.9	8.54	-0.65	2.35e-06	2.93e-05	245	231.45	354.52	390.62	Promoter (<=1kb)	2	118277098	118373419	96322	2	381413	uc008lru.2	0	ENSMUSG00000040133	Gpr176	G protein-coupled receptor 176	uc008lru.2	381413	0
chr5	113323320	113339401	16082	*	8.16	7.77	8.46	-0.69	2.35e-06	2.93e-05	202	235.02	372.25	331.54	Promoter (<=1kb)	5	113324493	113324545	53	2	102465709	uc008yup.2	0	ENSMUSG00000105778	Mir7229	microRNA 7229	uc008yup.2;uc008yvp.3	102465709;102466821	0;0
chr2	126551304	126556221	4918	*	7.07	6.51	7.47	-0.96	2.38e-06	2.97e-05	85	97.03	184.46	169.99	Promoter (<=1kb)	2	126553024	126588243	35220	1	26458	uc008mdq.1	0	ENSMUSG00000027359	Slc27a2	solute carrier family 27 (fatty acid transporter), member 2	uc008mdq.1	26458	0
chr6	114965699	114976396	10698	*	7.55	7.09	7.9	-0.81	2.4e-06	2.98e-05	137	135.31	254.81	223.64	Promoter (<=1kb)	6	114862090	114969203	107114	2	232334	uc009dig.3	0	ENSMUSG00000030315	Vgll4	vestigial like family member 4	uc009dig.3	232334	0
chr6	28121127	28158442	37316	*	9.26	9.01	9.48	-0.47	2.42e-06	3.01e-05	512	518.99	724.01	699.86	Promoter (<=1kb)	6	27275121	28126426	851306	2	14823	uc009bcj.1	0	ENSMUSG00000024211	Grm8	glutamate receptor, metabotropic 8	uc009bcj.1;uc009bck.1;uc009bcl.1	14823;14823;14823	0;0;0
chr2	29741364	29753465	12102	*	7.49	7.02	7.85	-0.83	2.43e-06	3.02e-05	126	133.53	243.74	217.01	Distal Intergenic	2	29761528	29764089	2562	1	433416	uc012btg.1	-8063	ENSMUSG00000075425	Gm13547	predicted gene 13547	uc008izu.1;uc008izv.1;uc008izw.1	107746;107746;107746	121644;121644;121644
chr6	100550605	100574363	23759	*	8.48	8.15	8.75	-0.59	2.44e-06	3.03e-05	294	275.96	441.49	417.14	3' UTR	6	100571811	100671157	99347	2	72171	uc009dby.3	96794	ENSMUSG00000035378	Shq1	SHQ1 homolog (S. cerevisiae)	uc009dby.3;uc009dbz.3;uc033itp.2	72171;72171;72171	0;0;0
chr5	98853145	98867188	14044	*	7.91	7.49	8.23	-0.73	2.48e-06	3.07e-05	196	164.69	311.87	286.94	Promoter (<=1kb)	5	98854415	98873760	19346	1	110075	uc008ygg.2	0	ENSMUSG00000029335	Bmp3	bone morphogenetic protein 3	uc008ygg.2;uc008ygh.3;uc012dzo.2	110075;110075;110075	0;0;0
chr7	139941189	139949074	7886	*	7.29	6.78	7.67	-0.89	2.48e-06	3.07e-05	106	113.06	217.15	189.28	Promoter (<=1kb)	7	139943856	139945112	1257	1	22286	uc009kgf.1	0	ENSMUSG00000047751	Utf1	undifferentiated embryonic cell transcription factor 1	uc009kgf.1;uc009kgd.1;uc009kge.1	22286;76484;76484	0;0;0
chr8	25271073	25307344	36272	*	9.11	8.84	9.33	-0.49	2.53e-06	3.13e-05	442	474.48	650.88	637.17	Promoter (<=1kb)	8	25302650	25306270	3621	2	74489	uc009lfw.1	0	ENSMUSG00000110140	5430421F17Rik	RIKEN cDNA 5430421F17 gene	uc009lfw.1	74489	0
chr2	168598071	168606083	8013	*	7.28	6.75	7.66	-0.92	2.55e-06	3.15e-05	99	115.73	220.47	185.06	Promoter (<=1kb)	2	168476410	168601657	125248	2	18019	uc012cjx.2	0	ENSMUSG00000027544	Nfatc2	nuclear factor of activated T cells, cytoplasmic, calcineurin dependent 2	uc012cjx.2;uc012cjy.2;uc012cjz.2;uc012cka.2;uc012ckb.2;uc012ckc.2;uc008oax.3;uc008oay.3;uc012ckf.3;uc012ckh.2;uc012cki.2	18019;18019;18019;18019;18019;18019;18019;18019;18019;18019;18019	0;0;0;0;0;0;0;0;0;0;0
chr4	43522054	43528108	6055	*	7.01	6.44	7.41	-0.97	2.57e-06	3.17e-05	87	87.24	165.63	174.81	Promoter (<=1kb)	4	43513726	43523554	9829	2	22004	uc008sqb.2	0	ENSMUSG00000028464	Tpm2	tropomyosin 2, beta	uc008sqe.2;uc008sqb.2;uc008sqc.2;uc008sqd.2	21894;22004;22004;22004	34475;0;0;0
chr6	39114947	39122687	7741	*	7.48	7.02	7.84	-0.82	2.58e-06	3.18e-05	126	133.53	233.21	223.64	Promoter (<=1kb)	6	39086412	39118349	31938	2	243771	uc009blg.2	0	ENSMUSG00000038507	Parp12	poly (ADP-ribose) polymerase family, member 12	uc009blg.2;uc009blh.1	243771;75379	0;0
chr12	110186494	110194952	8459	*	7.26	6.72	7.65	-0.93	2.63e-06	3.24e-05	120	90.8	213.82	187.47	Distal Intergenic	12	110151654	110158073	6420	2	67280	uc007pbg.2	-28421	ENSMUSG00000113331	3110009F21Rik	RIKEN cDNA 3110009F21 gene	NA	NA	NA
chr19	42197174	42213023	15850	*	7.98	7.55	8.31	-0.76	2.66e-06	3.28e-05	159	214.54	331.26	302.61	Promoter (<=1kb)	19	42197971	42202252	4282	2	54612	uc008hnl.2	0	ENSMUSG00000018822	Sfrp5	secreted frizzled-related sequence protein 5	uc008hnj.3;uc012blu.2;uc012blv.2;uc008hnl.2	319740;319740;319740;54612	26607;26607;26607;0
chr12	83478818	83494236	15419	*	8.06	7.69	8.36	-0.67	2.67e-06	3.28e-05	207	204.75	339.57	317.08	Promoter (<=1kb)	12	83213751	83487736	273986	2	70127	uc007odc.2	0	ENSMUSG00000021221	Dpf3	D4, zinc and double PHD fingers, family 3	uc007odc.2;uc007odd.3;uc007ode.3	70127;70127;70127	0;0;0
chr2	132877142	132881821	4680	*	6.44	5.71	6.93	-1.21	2.71e-06	3.33e-05	56	48.96	127.96	115.14	Promoter (<=1kb)	2	132868516	132880862	12347	2	320974	uc008mnn.1	0	ENSMUSG00000043110	Lrrn4	leucine rich repeat neuronal 4	uc008mnn.1	320974	0
chr2	158659703	158672213	12511	*	7.61	7.15	7.95	-0.8	2.73e-06	3.35e-05	143	141.54	266.45	229.07	Promoter (<=1kb)	2	158666630	158766334	99705	1	228852	uc012cil.1	0	ENSMUSG00000037754	Ppp1r16b	protein phosphatase 1, regulatory subunit 16B	uc012cil.1;uc008nqo.2;uc008nqp.2	228852;228852;228852	0;0;0
chr15	11884888	11914164	29277	*	8.9	8.61	9.15	-0.54	2.74e-06	3.37e-05	378	403.26	601.58	533.48	Promoter (<=1kb)	15	11839896	11890986	51091	2	18162	uc007vhd.2	0	ENSMUSG00000022206	Npr3	natriuretic peptide receptor 3	uc007vhd.2;uc007vhe.2;uc007vhf.2;uc007vhg.2;uc007vhh.1	18162;18162;18162;18162;381002	0;0;0;0;0
chr10	73094004	73109982	15979	*	8.11	7.74	8.41	-0.67	2.77e-06	3.4e-05	229	198.52	348.43	332.15	Promoter (<=1kb)	10	73099342	74317264	1217923	1	11994	uc007fpe.1	0	ENSMUSG00000052613	Pcdh15	protocadherin 15	uc007fpe.1	11994	0
chr2	113751477	113763625	12149	*	7.87	7.44	8.2	-0.75	2.8e-06	3.43e-05	196	152.23	304.12	283.32	Promoter (<=1kb)	2	113748675	113758648	9974	2	23892	uc008lpp.2	0	ENSMUSG00000074934	Grem1	gremlin 1, DAN family BMP antagonist	uc008lpp.2	23892	0
chr10	60184030	60187466	3437	*	6.25	5.45	6.75	-1.3	2.84e-06	3.47e-05	45	42.73	107.47	108.51	Promoter (1-2kb)	10	60181527	60188707	7181	2	53374	uc007fem.3	1241	ENSMUSG00000057337	Chst3	carbohydrate sulfotransferase 3	uc007fem.3;uc011xeg.2	53374;53374	0;0
chr13	74007861	74012446	4586	*	6.37	5.62	6.87	-1.25	2.85e-06	3.49e-05	53	45.4	122.98	110.31	Promoter (<=1kb)	13	74009419	74035753	26335	1	72948	uc007reo.2	0	ENSMUSG00000021573	Tppp	tubulin polymerization promoting protein	uc007reo.2	72948	0
chr11	119386872	119396961	10090	*	7.6	7.11	7.96	-0.86	2.87e-06	3.5e-05	123	153.12	276.42	223.04	Promoter (<=1kb)	11	119390472	119390561	90	1	100316690	uc011yis.1	0	ENSMUSG00000088015	Mir1932	microRNA 1932	uc011yis.1	100316690	0
chr8	121253648	121310364	56717	*	9.82	9.6	10.02	-0.42	2.91e-06	3.55e-05	742	810.98	1076.31	995.84	Distal Intergenic	8	121127685	121130644	2960	1	14241	uc009nrs.1	125963	ENSMUSG00000097084	Foxl1	forkhead box L1	NA	NA	NA
chr13	73519733	73540020	20288	*	8.37	8.04	8.64	-0.6	2.92e-06	3.56e-05	265	261.72	399.39	399.06	Promoter (<=1kb)	13	73536747	73578672	41926	1	13162	uc007rdn.1	0	ENSMUSG00000021609	Slc6a3	solute carrier family 6 (neurotransmitter transporter, dopamine), member 3	uc007rdn.1	13162	0
chr7	141069046	141089247	20202	*	8.16	7.79	8.45	-0.65	2.98e-06	3.63e-05	217	227	364.5	334.56	Promoter (<=1kb)	7	141070275	141072119	1845	1	330671	uc009kjg.1	0	ENSMUSG00000055629	B4galnt4	beta-1,4-N-acetyl-galactosaminyl transferase 4	uc009kjk.1;uc009kjl.1;uc009kjm.1;uc009kje.1;uc009kjf.1;uc012fwn.1;uc009kjg.1;uc009kjh.2;uc009kji.2;uc009kjj.2	24058;24058;24058;330671;330671;330671;330671;56460;56460;56460	11299;11299;11299;0;5209;0;0;0;0;0
chr8	119837107	119889500	52394	*	9.96	9.75	10.14	-0.39	2.99e-06	3.64e-05	884	839.47	1162.73	1091.08	Promoter (<=1kb)	8	119862305	119870716	8412	1	234796	uc009nql.1	0	ENSMUSG00000031828	Klhl36	kelch-like 36	uc009nql.1;uc009nqm.1;uc012glt.1	234796;234796;72042	0;0;0
chr13	96126565	96141024	14460	*	8.09	7.7	8.39	-0.69	3.05e-06	3.71e-05	213	203.86	361.73	309.84	Promoter (<=1kb)	13	95959443	96132577	173135	2	75209	uc007rmt.2	0	ENSMUSG00000051111	Sv2c	synaptic vesicle glycoprotein 2c	uc007rmt.2	75209	0
chr11	112760410	112797660	37251	*	8.99	8.7	9.24	-0.54	3.09e-06	3.76e-05	391	441.54	641.47	566.64	Promoter (<=1kb)	11	112782210	112787757	5548	1	20682	uc007med.2	0	ENSMUSG00000000567	Sox9	SRY (sex determining region Y)-box 9	uc007mee.2;uc056ypd.1;uc007med.2;uc007mec.1	100038732;100038732;20682;217294	0;0;0;0
chr8	35658148	35933973	275826	*	12.37	12.28	12.46	-0.18	3.09e-06	3.76e-05	4850	5082.2	5698.98	5572.34	Promoter (<=1kb)	8	35864085	35882957	18873	2	330737	uc029wsi.1	0	ENSMUSG00000109761	5430403N17Rik	RIKEN cDNA 5430403N17 gene	uc029wsi.1;uc009lla.1;uc009llb.1;uc009llc.2	330737;52065;52065;71908	0;0;0;0
chr4	152336704	152342581	5878	*	6.58	5.91	7.04	-1.13	3.11e-06	3.78e-05	61	59.64	132.95	130.21	Promoter (<=1kb)	4	152338651	152390194	51544	1	269610	uc008wai.1	0	ENSMUSG00000005045	Chd5	chromodomain helicase DNA binding protein 5	uc033igy.1;uc008wah.2;uc033igz.1;uc033iha.1;uc033ihb.1;uc008wai.1;uc012dqc.1	19934;19934;19934;19934;19934;269610;269610	12268;10978;10978;10978;10978;0;0
chr2	18789762	18819210	29449	*	8.82	8.53	9.06	-0.54	3.12e-06	3.78e-05	394	344.51	533.45	537.7	Promoter (<=1kb)	2	18799245	18801818	2574	2	66774	uc057bmo.2	0	ENSMUSG00000097638	Carlr	cardiac and apoptosis-related long non-coding RNA	uc057bmo.2	66774	0
chr15	100634147	100637470	3324	*	6.26	5.47	6.77	-1.29	3.14e-06	3.81e-05	48	40.95	109.13	108.51	Promoter (<=1kb)	15	100621339	100635559	14221	2	207818	uc033gwq.2	0	ENSMUSG00000053559	Smagp	small cell adhesion glycoprotein	uc033gwq.2;uc033gwr.2;uc007xru.3;uc007xrv.3;uc033gws.2;uc033gwt.2;uc033gwu.1	207818;207818;207818;207818;207818;207818;668218	0;0;0;0;0;0;32030
chr8	95121580	95152846	31267	*	9.14	8.88	9.37	-0.49	3.16e-06	3.82e-05	449	490.51	686.34	636.56	Promoter (<=1kb)	8	95099828	95142540	42713	2	16582	uc009mxv.1	0	ENSMUSG00000031788	Kifc3	kinesin family member C3	uc009mxv.1;uc012giq.1;uc009mxx.1;uc009mxz.1;uc009mya.1	16582;16582;16582;16582;16582	0;0;0;0;0
chr3	107092306	107106245	13940	*	7.86	7.44	8.18	-0.75	3.17e-06	3.83e-05	155	191.39	298.58	282.11	Promoter (<=1kb)	3	107101567	107115005	13439	1	16490	uc008qws.2	0	ENSMUSG00000040724	Kcna2	potassium voltage-gated channel, shaker-related subfamily, member 2	uc008qws.2	16490	0
chr2	75567254	75612948	45695	*	9.5	9.25	9.71	-0.46	3.17e-06	3.83e-05	646	570.62	868.58	802.94	Distal Intergenic	2	75659259	75669407	10149	1	229279	uc008kel.2	-46311	ENSMUSG00000059005	Hnrnpa3	heterogeneous nuclear ribonucleoprotein A3	NA	NA	NA
chr12	11140579	11156337	15759	*	7.91	7.51	8.22	-0.71	3.19e-06	3.84e-05	178	186.94	309.1	286.33	Promoter (<=1kb)	12	11090202	11150373	60172	2	238076	uc007nas.1	0	ENSMUSG00000043673	Kcns3	potassium voltage-gated channel, delayed-rectifier, subfamily S, member 3	uc007nas.1;uc011ykd.1	238076;238076	0;0
chr9	43198420	43209618	11199	*	7.48	7.01	7.83	-0.82	3.21e-06	3.87e-05	125	133.53	240.41	215.8	Promoter (<=1kb)	9	43123939	43205755	81817	2	18988	uc009pbe.1	0	ENSMUSG00000032015	Pou2f3	POU domain, class 2, transcription factor 3	uc009pbe.1	18988	0
chr6	87726816	87740809	13994	*	7.82	7.41	8.14	-0.74	3.25e-06	3.92e-05	168	171.81	301.35	264.63	Promoter (<=1kb)	6	87730869	87734017	3149	1	58229	uc009ctu.1	0	ENSMUSG00000068263	Efcc1	EF hand and coiled-coil domain containing 1	uc009ctu.1;uc012eoo.2	58229;58229	0;0
chr18	66285495	66295457	9963	*	7.75	7.3	8.1	-0.8	3.26e-06	3.93e-05	178	136.2	295.81	251.97	Promoter (<=1kb)	18	66047166	66291446	244281	2	320924	uc008ffp.1	0	ENSMUSG00000046318	Ccbe1	collagen and calcium binding EGF domains 1	uc008ffp.1;uc008ffr.1	320924;320924	0;0
chr4	63212209	63218749	6541	*	6.78	6.15	7.21	-1.06	3.3e-06	3.96e-05	69	73	160.64	136.23	Promoter (<=1kb)	4	63215412	63275020	59609	1	373864	uc008tfr.1	0	ENSMUSG00000045672	Col27a1	collagen, type XXVII, alpha 1	uc008tfr.1;uc008tfs.2	373864;373864	0;0
chr3	152974163	152983896	9734	*	7.41	6.94	7.77	-0.83	3.35e-06	4.02e-05	118	127.3	219.36	215.8	Promoter (<=1kb)	3	152820709	152982207	161499	2	26938	uc008rtu.2	0	ENSMUSG00000039037	St6galnac5	ST6 (alpha-N-acetyl-neuraminyl-2,3-beta-galactosyl-1,3)-N-acetylgalactosaminide alpha-2,6-sialyltransferase 5	uc008rtu.2	26938	0
chr7	108949717	108959947	10231	*	7.43	6.95	7.78	-0.83	3.36e-06	4.03e-05	125	121.96	206.62	233.89	Promoter (<=1kb)	7	108950338	109022753	72416	1	22141	uc009jdd.1	0	ENSMUSG00000031028	Tub	tubby bipartite transcription factor	uc009jdd.1	22141	0
chr8	123812021	123899057	87037	*	10.64	10.46	10.79	-0.34	3.45e-06	4.13e-05	1322	1487.54	1819.15	1732.47	Promoter (<=1kb)	8	123891758	123894775	3018	2	11459	uc009nwr.2	0	ENSMUSG00000031972	Acta1	actin, alpha 1, skeletal muscle	uc009nwr.2;uc033jim.1;uc009nwo.2;uc009nws.2;uc009nwp.1;uc009nwq.1	11459;11459;19341;234865;73420;73420	0;0;0;0;0;0
chr5	117854693	117873515	18823	*	7.97	7.58	8.27	-0.69	3.51e-06	4.2e-05	187	196.74	321.84	297.18	Promoter (<=1kb)	5	117866839	117958840	92002	1	18125	uc008zfy.3	0	ENSMUSG00000029361	Nos1	nitric oxide synthase 1, neuronal	uc008zfx.4;uc008zfy.3	18125;18125	0;0
chr19	42373361	42387723	14363	*	7.71	7.28	8.04	-0.76	3.51e-06	4.2e-05	147	164.69	276.42	251.37	Intron (uc008hno.1/72832, intron 2 of 14)	19	42283037	42431783	148747	2	72832	uc008hno.1	44060	ENSMUSG00000042401	Crtac1	cartilage acidic protein 1	uc008hno.1	72832	0
chr18	77181398	77194063	12666	*	7.53	7.07	7.88	-0.81	3.55e-06	4.24e-05	124	145.1	241.52	229.07	Promoter (<=1kb)	18	77185847	77255450	69604	1	225742	uc008frg.2	0	ENSMUSG00000025425	St8sia5	ST8 alpha-N-acetyl-neuraminide alpha-2,8-sialyltransferase 5	uc008frg.2;uc008frh.2	225742;225742	0;0
chr11	102098057	102114523	16467	*	7.94	7.54	8.26	-0.72	3.6e-06	4.29e-05	195	178.04	329.04	283.32	Promoter (<=1kb)	11	102099931	102101300	1370	2	19064	uc007lqm.1	0	ENSMUSG00000017316	Ppy	pancreatic polypeptide	uc007lqm.1;uc007lqn.1;uc057kmm.1;uc007lqo.2	19064;19064;217212;217212	0;0;0;0
chr2	152625434	152637381	11948	*	7.64	7.18	7.99	-0.8	3.61e-06	4.3e-05	143	147.77	279.19	227.86	Promoter (<=1kb)	2	152627008	152635191	8184	1	19700	uc008nfw.1	0	ENSMUSG00000000359	Rem1	rad and gem related GTP binding protein 1	uc008nfw.1;uc008nfv.1	19700;654459	0;-2381
chr5	110341850	110364961	23112	*	8.39	8.07	8.66	-0.59	3.64e-06	4.34e-05	265	271.51	404.93	403.28	Promoter (<=1kb)	5	110339812	110343035	3224	2	231602	uc008yqr.2	0	ENSMUSG00000029503	P2rx2	purinergic receptor P2X, ligand-gated ion channel, 2	uc008yqm.2;uc008yqn.2;uc008yqo.2;uc008yqp.2;uc008yqr.2;uc008yqs.2;uc008yqt.2;uc008yqu.2;uc008yqq.1;uc033ikz.2;uc033ila.2;uc008yqv.2;uc057buw.1;uc008yqw.2;uc012ebb.2	18973;18973;18973;18973;231602;231602;231602;231602;231602;381667;381667;381667;381667;381668;381668	55531;14231;11153;7990;0;0;0;0;0;0;0;0;0;0;0
chr1	89964124	89994281	30158	*	9	8.72	9.24	-0.52	3.7e-06	4.4e-05	417	423.74	647.01	561.21	Exon (uc007bzd.1/208372, exon 3 of 6)	1	89952678	90014577	61900	2	208372	uc007bzd.1	20296	ENSMUSG00000067081	Asb18	ankyrin repeat and SOCS box-containing 18	uc007bzd.1;uc007bze.1;uc011wpb.1	208372;208372;208372	0;0;0
chr14	46876688	46887147	10460	*	7.58	7.13	7.92	-0.79	3.73e-06	4.43e-05	149	131.75	255.92	229.67	Promoter (<=1kb)	14	46882965	47105817	222853	1	74480	uc007thn.2	0	ENSMUSG00000021838	Samd4	sterile alpha motif domain containing 4	uc007thn.2;uc007tho.2;uc007thp.1	74480;74480;74480	0;0;0
chr9	14845199	14863803	18605	*	8.34	7.98	8.63	-0.64	3.76e-06	4.47e-05	239	267.06	426.54	364.1	Promoter (<=1kb)	9	14860210	14870789	10580	1	14608	uc009off.2	0	ENSMUSG00000031932	Gpr83	G protein-coupled receptor 83	uc009off.2;uc012goj.2	14608;14608	0;0
chr11	35795134	35803680	8547	*	7.4	6.91	7.77	-0.86	3.77e-06	4.47e-05	129	111.28	237.09	198.93	Promoter (<=1kb)	11	35797380	35798884	1505	2	237730	uc007ilg.1	0	ENSMUSG00000051062	Fbll1	fibrillarin-like 1	uc007ilh.2;uc007ilf.1;uc007ilg.1	104458;211347;237730	30848;25639;0
chr9	103759468	103767669	8202	*	7.19	6.66	7.58	-0.92	3.84e-06	4.55e-05	115	87.24	194.43	187.47	Promoter (<=1kb)	9	103482936	103761837	278902	2	81907	uc009rgy.2	0	ENSMUSG00000042757	Tmem108	transmembrane protein 108	uc009rgy.2;uc009rgz.2	81907;81907	0;0
chr5	106545868	106576338	30471	*	9.1	8.82	9.34	-0.52	3.86e-06	4.57e-05	497	407.72	642.02	652.84	Exon (uc008ylo.2/uc008ylo.2, exon 1 of 2)	5	106616741	106638328	21588	2	52397	uc008ylp.1	61990	ENSMUSG00000049606	Zfp644	zinc finger protein 644	NA	NA	NA
chr5	147210470	147225390	14921	*	7.93	7.54	8.23	-0.69	3.88e-06	4.59e-05	194	178.04	306.89	294.17	Distal Intergenic	5	147188696	147190947	2252	1	14842	uc009anw.2	21774	ENSMUSG00000053129	Gsx1	GS homeobox 1	uc009anx.1	70147	0
chr12	81621473	81638089	16617	*	8.13	7.77	8.42	-0.64	3.95e-06	4.67e-05	220	217.21	348.99	333.95	Promoter (<=1kb)	12	81631249	81667551	36303	1	69480	uc007ocn.2	0	ENSMUSG00000042734	Ttc9	tetratricopeptide repeat domain 9	uc007ocn.2;uc007ocm.2	69480;69480	0;0
chr11	49632917	49640886	7970	*	7.15	6.6	7.55	-0.94	4.04e-06	4.77e-05	92	102.37	206.62	166.98	Exon (uc007iqu.2/14257, exon 12 of 30)	11	49609679	49652739	43061	1	14257	uc007iqu.2	23238	ENSMUSG00000020357	Flt4	FMS-like tyrosine kinase 4	uc007iqu.2	14257	0
chr7	30628970	30636782	7813	*	7.18	6.66	7.57	-0.9	4.04e-06	4.77e-05	103	99.7	203.85	175.42	Promoter (<=1kb)	7	30633616	30635852	2237	2	14008	uc009gfm.1	0	ENSMUSG00000006311	Etv2	ets variant 2	uc009gfl.1;uc009gfm.1;uc009ggd.3;uc009gfn.2;uc009gfo.2	110323;14008;14447;68035;71909	-2819;0;0;13446;28212
chr11	3993631	4004763	11133	*	7.56	7.11	7.91	-0.8	4.12e-06	4.85e-05	134	141.54	260.35	220.63	5' UTR	11	3983636	3999328	15693	1	53897	uc007hub.2	9995	ENSMUSG00000049721	Gal3st1	galactose-3-O-sulfotransferase 1	uc007hub.2;uc007huc.2;uc007hud.2	53897;53897;53897	0;0;0
chr17	33977360	34007946	30587	*	8.98	8.7	9.22	-0.52	4.15e-06	4.89e-05	383	445.99	612.66	578.09	Promoter (<=1kb)	17	33996012	34000333	4322	2	14972	uc008cap.1	0	ENSMUSG00000061232	H2-K1	histocompatibility 2, K1, K region	uc008cap.1;uc012apq.1;uc033hct.1;uc008car.2;uc008caq.2;uc008cao.1;uc012app.1	14972;14972;14972;14972;14972;433100;630499	0;0;0;0;0;0;0
chr19	46754368	46767245	12878	*	7.78	7.37	8.11	-0.74	4.17e-06	4.91e-05	166	164.69	294.7	256.8	Promoter (<=1kb)	19	46761609	46878580	116972	1	94219	uc008hue.1	0	ENSMUSG00000064105	Cnnm2	cyclin M2	uc008hue.1;uc008huf.1	94219;94219	0;0
chr1	136256203	136271772	15570	*	8.01	7.63	8.31	-0.68	4.19e-06	4.93e-05	206	191.39	331.26	303.81	Promoter (<=1kb)	1	136258914	136260873	1960	2	383563	uc011wsy.1	0	ENSMUSG00000052759	Gpr25	G protein-coupled receptor 25	uc011wsy.1;uc011wsz.1;uc007cuq.1;uc007cur.2;uc011wta.2	383563;67886;67886;67886;67886	0;0;0;0;0
chr5	98245593	98262380	16788	*	8.33	7.99	8.61	-0.62	4.23e-06	4.97e-05	245	264.39	408.26	371.93	Promoter (<=1kb)	5	98254184	98277033	22850	1	14176	uc008ygc.2	0	ENSMUSG00000029337	Fgf5	fibroblast growth factor 5	uc008ygc.2;uc008ygd.2	14176;14176	0;0
chr2	181132391	181149260	16870	*	8.12	7.77	8.41	-0.64	4.35e-06	5.1e-05	223	212.76	344.55	335.16	Promoter (<=1kb)	2	181075579	181135289	59711	2	16536	uc008okr.2	0	ENSMUSG00000016346	Kcnq2	potassium voltage-gated channel, subfamily Q, member 2	uc008olh.1;uc008okr.2;uc008oks.2;uc008okt.2;uc008oku.2;uc008okv.2;uc008oky.2;uc008okz.2;uc008olb.2;uc008olc.2;uc008old.2;uc008olf.2;uc008olg.2	13628;16536;16536;16536;16536;16536;16536;16536;16536;16536;16536;16536;16536	0;0;0;0;0;0;0;0;0;0;0;0;0
chr4	133495947	133505149	9203	*	7.34	6.85	7.71	-0.86	4.39e-06	5.15e-05	102	128.19	209.39	209.17	Promoter (<=1kb)	4	133491100	133498550	7451	2	69539	uc008vcu.1	0	ENSMUSG00000056596	Trnp1	TMF1-regulated nuclear protein 1	uc008vcu.1	69539	0
chr11	62246864	62261059	14196	*	7.82	7.42	8.13	-0.72	4.43e-06	5.19e-05	177	164.69	291.93	269.45	Promoter (<=1kb)	11	62248984	62266452	17469	1	11541	uc007jio.1	0	ENSMUSG00000018500	Adora2b	adenosine A2b receptor	uc007jio.1	11541	0
chr16	21243923	21250257	6335	*	6.81	6.21	7.23	-1.02	4.48e-06	5.24e-05	70	78.34	152.33	148.29	Exon (uc007yri.1/328646, exon 5 of 5)	16	21247499	21296872	49374	2	328646	uc007yri.1	46615	ENSMUSG00000096918	Gm16863	predicted gene, 16863	uc007yri.1	328646	0
chr11	11110812	11121020	10209	*	7.78	7.36	8.11	-0.75	4.56e-06	5.33e-05	156	171.81	299.13	253.18	Promoter (<=1kb)	11	11114016	11263526	149511	1	319922	uc007iac.1	0	ENSMUSG00000050830	Vwc2	von Willebrand factor C domain containing 2	uc007iac.1;uc007iad.2	319922;319922	0;0
chr8	106252705	106478522	225818	*	12.04	11.93	12.14	-0.21	4.57e-06	5.34e-05	3740	4049.56	4587.77	4444.49	Promoter (<=1kb)	8	106415339	106425728	10390	1	22751	uc009ngc.1	0	ENSMUSG00000031907	Zfp90	zinc finger protein 90	uc009nfu.1;uc009ngc.1;uc009ngd.1;uc033jhl.1;uc033jhm.1;uc009nge.1;uc009nfx.1;uc009nfy.1;uc009nfz.1;uc009nga.2;uc057amv.1	214572;22751;22751;22751;22751;22751;58994;58994;58994;75044;75044	0;0;0;0;0;0;0;0;0;0;0
chr6	55444249	55456229	11981	*	7.5	7.06	7.84	-0.79	4.58e-06	5.35e-05	137	129.08	230.44	228.46	Promoter (<=1kb)	6	55451978	55501455	49478	1	11517	uc009cat.2	0	ENSMUSG00000029778	Adcyap1r1	adenylate cyclase activating polypeptide 1 receptor 1	uc009cat.2;uc009cau.2	11517;11517	0;0
chr8	71472695	71490444	17750	*	8.27	7.93	8.54	-0.61	4.64e-06	5.41e-05	238	250.15	376.68	368.92	Promoter (<=1kb)	8	71476019	71486067	10049	2	382014	uc009mdl.2	0	ENSMUSG00000034863	Ano8	anoctamin 8	uc009mdl.2;uc009mdm.2;uc009mdi.3;uc009mdk.3;uc057aly.1;uc057alz.2;uc057ama.1;uc009mdn.1;uc009mdo.1	382014;382014;66498;66498;66498;66498;66498;70359;70359	0;0;0;0;0;0;0;0;0
chr8	25029213	25042686	13474	*	7.94	7.56	8.24	-0.68	4.68e-06	5.45e-05	186	191.39	309.65	295.38	Promoter (<=1kb)	8	25024928	25038962	14035	2	330723	uc009lfp.2	0	ENSMUSG00000037406	Htra4	HtrA serine peptidase 4	uc009lfp.2;uc057lww.1;uc009lfq.3;uc009lfr.3	330723;83436;83436;83436	0;0;0;0
chr8	84172989	84209142	36154	*	9.21	8.95	9.42	-0.47	4.7e-06	5.47e-05	471	518.1	699.63	672.13	Promoter (<=1kb)	8	84178716	84178787	72	2	100049549	uc012ghb.1	0	ENSMUSG00000076338	Mir181d	microRNA 181d	uc012ghb.1;uc012ghg.1;uc009mmg.1;uc009mme.1;uc009mmf.1;uc012ghd.1;uc012ghe.1;uc012ghc.1;uc012ghf.1;uc009mmc.2;uc009mmd.2	100049549;100526528;212168;244551;244551;387216;387220;723819;723960;74666;74666	0;0;27900;0;0;0;0;0;0;24951;24951
chr11	74587916	74595403	7488	*	7.19	6.65	7.58	-0.93	4.8e-06	5.58e-05	84	116.62	197.76	185.66	Promoter (<=1kb)	11	74383483	74590158	206676	2	380711	uc007kbx.1	0	ENSMUSG00000038807	Rap1gap2	RAP1 GTPase activating protein 2	uc007kbx.1;uc007kby.1	380711;380711	0;0
chr7	44624718	44650781	26064	*	8.49	8.18	8.75	-0.57	4.8e-06	5.58e-05	277	301.78	432.63	427.99	Promoter (1-2kb)	7	44605803	44652571	46769	2	71960	uc012fjs.2	1790	ENSMUSG00000030739	Myh14	myosin, heavy polypeptide 14	uc012fjs.2;uc009gqi.2;uc012fjt.2;uc009gqj.2	71960;71960;71960;71960	0;0;0;0
chr2	168272200	168282593	10394	*	7.24	6.74	7.61	-0.87	4.83e-06	5.61e-05	101	113.06	202.74	188.68	Promoter (2-3kb)	2	168261698	168269331	7634	2	241794	uc008oat.1	-2869	ENSMUSG00000074575	Kcng1	potassium voltage-gated channel, subfamily G, member 1	uc008oat.1	241794	-2869
chr19	56823136	56834690	11555	*	7.7	7.26	8.03	-0.78	4.9e-06	5.69e-05	173	132.64	270.32	253.18	Promoter (<=1kb)	19	56826209	56870012	43804	1	83561	uc008hzi.1	0	ENSMUSG00000025081	Tdrd1	tudor domain containing 1	uc008hzh.1;uc008hzi.1;uc008hzj.1;uc012bnt.1;uc008hzk.1	213993;83561;83561;83561;83561	-955;0;0;0;0
chr9	56632020	56638693	6674	*	6.85	6.24	7.28	-1.04	4.92e-06	5.7e-05	80	71.22	174.49	136.84	Promoter (<=1kb)	9	56618464	56635648	17185	2	235402	uc009pth.2	0	ENSMUSG00000049556	Lingo1	leucine rich repeat and Ig domain containing 1	uc009pth.2;uc009pti.2	235402;235402	0;0
chr11	69338008	69342636	4629	*	7.27	6.75	7.65	-0.9	5.01e-06	5.81e-05	98	117.51	218.81	182.65	Promoter (<=1kb)	11	69340769	69342647	1879	1	80515	uc007jpv.2	0	ENSMUSG00000043419	Rnf227	ring finger protein 227	uc007jps.1;uc007jpt.1;uc007jpu.1;uc029rmh.2;uc007jpx.3;uc029rmi.2;uc007jpv.2	16499;16499;16499;216848;216848;216848;80515	11750;10142;7684;3248;5974;26790;0
chr8	94987572	95036591	49020	*	9.69	9.47	9.89	-0.43	5.05e-06	5.84e-05	663	752.23	976.05	924.1	Promoter (<=1kb)	8	95002427	95014208	11782	1	14766	uc009mxo.2	0	ENSMUSG00000031785	Adgrg1	adhesion G protein-coupled receptor G1	uc009mxm.2;uc009mxl.2;uc009mxn.2;uc009mxo.2;uc009mxp.3;uc009mxq.2	14766;14766;14766;14766;54672;54672	0;0;0;0;0;0
chr7	109008773	109012679	3907	*	6.43	5.71	6.9	-1.2	5.06e-06	5.85e-05	60	44.51	120.21	119.36	Promoter (<=1kb)	7	109010880	109034459	23580	1	22141	uc009jdf.1	0	ENSMUSG00000031028	Tub	tubby bipartite transcription factor	uc009jdd.1;uc009jdf.1	22141;22141	0;0
chr1	87504925	87515535	10611	*	7.56	7.13	7.9	-0.77	5.06e-06	5.85e-05	144	135.31	244.84	231.48	Promoter (<=1kb)	1	87476829	87510362	33534	2	53972	uc007bwx.2	0	ENSMUSG00000026259	Ngef	neuronal guanine nucleotide exchange factor	uc007bwx.2;uc007bwy.2	53972;53972	0;0
chr2	164163644	164174979	11336	*	7.82	7.42	8.13	-0.7	5.12e-06	5.91e-05	173	170.03	277.53	280.91	Promoter (<=1kb)	2	164163619	164171113	7495	2	16538	uc008ntv.1	0	ENSMUSG00000040164	Kcns1	K+ voltage-gated channel, subfamily S, 1	uc008ntv.1;uc012ciy.1;uc008ntw.2	16538;209232;209232	0;3900;7763
chr6	54424411	54431750	7340	*	7.16	6.65	7.53	-0.88	5.16e-06	5.95e-05	102	98.81	181.69	188.68	Promoter (<=1kb)	6	54269681	54430221	160541	2	100042056	uc012eme.1	0	ENSMUSG00000073067	9130019P16Rik	RIKEN cDNA 9130019P16 gene	uc012eme.1	100042056	0
chr11	101261200	101286715	25516	*	8.55	8.21	8.82	-0.61	5.23e-06	6.02e-05	285	308.01	493.01	409.31	Promoter (<=1kb)	11	101277970	101278948	979	2	52469	uc007log.1	0	ENSMUSG00000017188	Coa3	cytochrome C oxidase assembly factor 3	uc007loa.2;uc007lob.2;uc007loc.2;uc007lod.2;uc033gaf.1;uc007log.1;uc007loj.1;uc007lok.1;uc007lol.1;uc007loh.1;uc007loi.1;uc057kmk.1;uc007loe.2;uc007lof.2	28084;28084;28084;28084;28084;52469;56208;56208;56208;68107;68107;69847;69847;69847	14866;7596;7596;7596;7596;0;15552;15552;15552;0;0;0;0;0
chr3	96677857	96690287	12431	*	7.64	7.22	7.97	-0.75	5.31e-06	6.12e-05	152	146.88	258.69	242.93	5' UTR	3	96670131	96691009	20879	1	213121	uc008qnr.1	7726	ENSMUSG00000038354	Ankrd35	ankyrin repeat domain 35	uc008qnr.1;uc012cua.1;uc008qns.1;uc012cub.1	213121;213121;213121;213121	0;0;0;0
chr18	84717613	84725989	8377	*	7.33	6.84	7.7	-0.86	5.35e-06	6.15e-05	126	103.26	219.92	195.31	Promoter (<=1kb)	18	84720242	84740436	20195	1	240479	uc008fuv.1	0	ENSMUSG00000047992	Fam69c	family with sequence similarity 69, member C	uc008fuv.1	240479	0
chr1	134707296	134712948	5653	*	6.64	6	7.09	-1.08	5.35e-06	6.15e-05	64	64.1	145.13	126.59	Promoter (<=1kb)	1	134709300	134749417	40118	1	20980	uc007csk.1	0	ENSMUSG00000026452	Syt2	synaptotagmin II	uc007csi.1;uc007csj.1;uc007csk.1	20980;20980;20980	0;0;0
chr5	30700079	30719270	19192	*	8.34	7.99	8.62	-0.63	5.36e-06	6.15e-05	241	267.95	423.21	364.1	Promoter (<=1kb)	5	30711564	30799369	87806	1	65254	uc008wvw.1	0	ENSMUSG00000029168	Dpysl5	dihydropyrimidinase-like 5	uc008wvw.1;uc008wvx.1	65254;65254	0;0
chr13	10357636	10368913	11278	*	7.81	7.41	8.12	-0.71	5.47e-06	6.27e-05	181	159.35	280.3	276.69	Promoter (<=1kb)	13	9876613	10360803	484191	2	12671	uc007plb.1	0	ENSMUSG00000046159	Chrm3	cholinergic receptor, muscarinic 3, cardiac	uc007plb.1	12671	0
chr6	119104165	119114580	10416	*	7.53	7.08	7.87	-0.79	5.56e-06	6.37e-05	147	123.74	240.97	226.66	Promoter (<=1kb)	6	118587240	119108495	521256	2	12288	uc009dlt.3	0	ENSMUSG00000051331	Cacna1c	calcium channel, voltage-dependent, L type, alpha 1C subunit	uc009dlt.3;uc012erg.3;uc012erj.3;uc012erk.3;uc012erl.2;uc012erm.2;uc009dlu.3;uc009dlv.4;uc012erh.3;uc012eri.3	12288;12288;12288;12288;12288;12288;12288;12288;12288;12288	0;0;0;0;0;0;0;0;0;0
chr11	100684511	100701275	16765	*	7.77	7.37	8.08	-0.71	5.57e-06	6.38e-05	164	166.47	265.34	276.69	Promoter (2-3kb)	11	100694884	100704271	9388	2	80861	uc007llx.1	2996	ENSMUSG00000017830	Dhx58	DEXH (Asp-Glu-X-His) box polypeptide 58	uc007llz.2;uc007lma.2;uc007lmb.2;uc007lmc.2;uc011yfd.1;uc007llx.1;uc007lly.1	14534;14534;14534;14534;14534;80861;80861	7874;11192;11192;11192;11192;0;2996
chr8	94932854	94980823	47970	*	9.71	9.49	9.9	-0.41	5.58e-06	6.38e-05	686	749.56	987.68	923.5	Promoter (<=1kb)	8	94977109	95014196	37088	1	14766	uc009mxm.2	0	ENSMUSG00000031785	Adgrg1	adhesion G protein-coupled receptor G1	uc009mxm.2;uc009mxl.2;uc009mxn.2;uc009mxi.2;uc009mxj.2;uc009mxk.2	14766;14766;14766;382045;382045;382045	0;0;0;0;0;0
chr8	119897062	119948176	51115	*	9.87	9.66	10.05	-0.39	5.6e-06	6.4e-05	770	843.92	1086.84	1032.61	Promoter (<=1kb)	8	119910360	119957560	47201	1	22224	uc009nqn.3	0	ENSMUSG00000031826	Usp10	ubiquitin specific peptidase 10	uc009nqn.3;uc009nqo.3	22224;22224	0;0
chr2	66121180	66129325	8146	*	7.55	7.12	7.89	-0.77	5.66e-06	6.46e-05	143	135.31	234.32	238.71	Promoter (<=1kb)	2	66082766	66124793	42028	2	14425	uc008jwu.2	0	ENSMUSG00000026994	Galnt3	polypeptide N-acetylgalactosaminyltransferase 3	uc008jwu.2	14425	0
chr15	87539605	87549187	9583	*	7.33	6.84	7.69	-0.84	5.67e-06	6.47e-05	113	116.62	219.92	192.3	Promoter (<=1kb)	15	87544299	87759364	215066	1	106014	uc007xee.1	0	ENSMUSG00000054863	Fam19a5	family with sequence similarity 19, member A5	uc007xee.1	106014	0
chr6	38349322	38357240	7919	*	7.21	6.71	7.58	-0.88	5.67e-06	6.47e-05	112	97.03	201.08	182.65	Promoter (<=1kb)	6	38307188	38354603	47416	2	78781	uc057lps.1	0	ENSMUSG00000029826	Zc3hav1	zinc finger CCCH type, antiviral 1	uc057lps.1;uc009bjz.2;uc009bka.1;uc012eka.1	78781;78781;78781;78781	0;0;0;0
chr3	107022542	107043520	20979	*	8.65	8.35	8.89	-0.54	5.71e-06	6.5e-05	332	321.37	485.81	462.35	Promoter (<=1kb)	3	107036162	107038129	1968	1	16491	uc008qwp.2	0	ENSMUSG00000047959	Kcna3	potassium voltage-gated channel, shaker-related subfamily, member 3	uc008qwp.2;uc008qwq.2	16491;229694	0;0
chr7	19060925	19073197	12273	*	7.59	7.16	7.92	-0.76	5.71e-06	6.5e-05	137	149.56	248.17	237.51	Exon (uc009fkj.2/83434, exon 3 of 6)	7	19054687	19074447	19761	1	83434	uc009fkj.2	6238	ENSMUSG00000040866	Rsph6a	radial spoke head 6 homolog A (Chlamydomonas)	uc012fax.1;uc009fkl.2;uc009fkm.2;uc009fkj.2;uc012faw.1	13401;13401;13401;83434;83434	-3003;-4770;-4770;0;0
chr4	154475539	154493267	17729	*	8.04	7.67	8.33	-0.66	5.75e-06	6.53e-05	194	213.65	321.84	321.3	Exon (uc008wbu.1/70673, exon 3 of 17)	4	154316125	154636873	320749	2	70673	uc008wbu.1	143606	ENSMUSG00000039410	Prdm16	PR domain containing 16	uc008wbu.1;uc008wbv.1;uc008wbw.1;uc008wbx.1	70673;70673;70673;70673	0;0;0;0
chr2	150679705	150691684	11980	*	7.79	7.38	8.11	-0.74	5.75e-06	6.53e-05	149	183.38	284.17	270.06	Promoter (<=1kb)	2	150680702	150689137	8436	2	114889	uc008muh.2	0	ENSMUSG00000033080	Vsx1	visual system homeobox 1	uc008muh.2	114889	0
chr1	156285967	156312538	26572	*	8.98	8.71	9.2	-0.49	5.78e-06	6.56e-05	417	421.96	573.33	603.41	Promoter (<=1kb)	1	156310719	156328035	17317	1	170484	uc007dch.2	0	ENSMUSG00000026602	Nphs2	nephrosis 2, podocin	uc007dch.2;uc007dcf.3;uc029qui.1;uc029quj.1	170484;214575;214575;214575	0;0;0;0
chr11	120044662	120050223	5562	*	6.54	5.84	7	-1.16	5.86e-06	6.65e-05	56	58.75	144.58	112.12	Promoter (<=1kb)	11	120007313	120047145	39833	2	11302	uc007mrm.4	0	ENSMUSG00000025375	Aatk	apoptosis-associated tyrosine kinase	uc007mrl.4;uc007mrm.4;uc007mro.4;uc007mrn.3	11302;11302;11302;11302	-2881;0;0;0
chr8	88509757	88561774	52018	*	9.82	9.6	10.01	-0.41	5.87e-06	6.65e-05	752	800.3	1079.64	976.55	Promoter (<=1kb)	8	88521344	88594887	73544	1	93960	uc009mro.2	0	ENSMUSG00000031661	Nkd1	naked cuticle 1	uc009mro.2;uc012gia.1	93960;93960	0;0
chr1	189340599	189347445	6847	*	7.02	6.47	7.42	-0.95	5.91e-06	6.69e-05	78	98.81	167.85	174.21	Promoter (<=1kb)	1	189207930	189343353	135424	2	16526	uc007eak.2	0	ENSMUSG00000037624	Kcnk2	potassium channel, subfamily K, member 2	uc007eak.2;uc011wyj.2;uc007eam.2;uc007ean.2	16526;16526;16526;16526	0;0;0;0
chr8	121098411	121247889	149479	*	11.41	11.15	11.62	-0.47	5.91e-06	6.69e-05	2203	2346.59	3372.97	2940.49	Promoter (<=1kb)	8	121116171	121118895	2725	1	14234	uc012glx.2	0	ENSMUSG00000046714	Foxc2	forkhead box C2	uc012glx.2;uc009nrs.1;uc009nro.1;uc009nrp.2;uc029wwp.1	14234;14241;234814;234814;234814	0;0;0;0;0
chr18	61035086	61041544	6459	*	6.7	6.08	7.13	-1.05	5.97e-06	6.74e-05	68	67.66	145.69	134.43	Promoter (<=1kb)	18	61018862	61036199	17338	2	12590	uc008fbj.2	0	ENSMUSG00000024619	Cdx1	caudal type homeobox 1	uc008fbj.2;uc008fbk.2;uc008fbl.2	12590;18596;18596	0;-3606;-3606
chr2	125712029	125732337	20309	*	8.39	8.06	8.65	-0.6	5.97e-06	6.74e-05	278	254.6	423.21	382.18	Promoter (<=1kb)	2	125627447	125724148	96702	2	271849	uc008mcv.1	0	ENSMUSG00000035109	Shc4	SHC (Src homology 2 domain containing) family, member 4	uc008mcv.1;uc012cdc.1;uc008mcy.1;uc008mcz.1	271849;271849;271849;70354	0;0;0;50533
chr5	147396545	147406636	10092	*	7.44	6.96	7.8	-0.84	6.01e-06	6.78e-05	114	135.31	242.07	203.75	Promoter (<=1kb)	5	147330741	147400489	69749	2	14255	uc009aob.3	0	ENSMUSG00000042817	Flt3	FMS-like tyrosine kinase 3	uc009aob.3	14255	0
chr3	94361191	94368416	7226	*	6.85	6.27	7.26	-0.99	6.07e-06	6.84e-05	79	75.67	157.87	148.29	Promoter (<=1kb)	3	94362444	94364567	2124	1	271944	uc012ctl.1	0	ENSMUSG00000091648	C2cd4d	C2 calcium-dependent domain containing 4D	uc008qfy.4;uc012ctl.1	19885;271944	-4378;0
chr6	122735426	122838930	103505	*	10.83	10.68	10.97	-0.29	6.19e-06	6.97e-05	1614	1678.04	2050.15	1961.53	Promoter (<=1kb)	6	122831377	122831437	61	1	102465710	uc033iun.1	0	ENSMUSG00000106580	Mir7231	microRNA 7231	uc033iun.1;uc009dpq.2;uc012esg.1;uc012esh.1	102465710;20527;20527;60611	0;0;0;0
chr11	117860286	117870303	10018	*	6.96	6.4	7.36	-0.96	6.21e-06	6.98e-05	78	90.8	159.54	168.18	Promoter (<=1kb)	11	117860752	117865543	4792	1	546519	uc007mof.1	0	ENSMUSG00000070330	Tmem235	transmembrane protein 235	uc007mod.1;uc007moe.1;uc007mof.1;uc007moh.2;uc011yik.1	11799;11799;546519;71776;71776	11049;11049;0;0;0
chr2	11496464	11504974	8511	*	7.19	6.69	7.56	-0.87	6.22e-06	6.99e-05	110	97.03	193.88	184.46	Promoter (<=1kb)	2	11471430	11502090	30661	2	170768	uc008iie.3	0	ENSMUSG00000026773	Pfkfb3	6-phosphofructo-2-kinase/fructose-2,6-biphosphatase 3	uc008iie.3;uc008iif.3;uc008iig.3;uc008iij.3;uc008iik.3;uc008iil.3;uc008iim.3;uc008iih.3;uc008iii.1;uc008iin.2	170768;170768;170768;170768;170768;170768;170768;170768;170768;170768	0;0;0;0;0;0;0;0;0;0
chr9	54688559	54702135	13577	*	7.83	7.43	8.15	-0.71	6.24e-06	7e-05	179	166.47	301.9	264.63	Promoter (<=1kb)	9	54698947	54716317	17371	1	58233	uc009prk.3	0	ENSMUSG00000032285	Dnaja4	DnaJ heat shock protein family (Hsp40) member A4	uc009prk.3;uc009prl.2	58233;58233	0;0
chr9	107596716	107603511	6796	*	7.01	6.48	7.4	-0.92	6.27e-06	7.03e-05	91	87.24	172.83	165.17	Promoter (1-2kb)	9	107597674	107605402	7729	2	20347	uc009rmf.2	1891	ENSMUSG00000057969	Sema3b	sema domain, immunoglobulin domain (Ig), short basic domain, secreted, (semaphorin) 3B	uc009rmd.1;uc009rmf.2;uc009rmg.2;uc009rmh.2;uc009rmi.2;uc009rmj.2;uc012haj.2	15983;20347;20347;20347;20347;20347;20347	8998;0;0;0;0;0;0
chr9	20723518	20732933	9416	*	7.34	6.85	7.7	-0.86	6.27e-06	7.03e-05	116	113.95	228.78	187.47	Promoter (<=1kb)	9	20667986	20728214	60229	2	244723	uc009oje.1	0	ENSMUSG00000032172	Olfm2	olfactomedin 2	uc009oje.1	244723	0
chr8	11472801	11485617	12817	*	7.75	7.33	8.08	-0.75	6.32e-06	7.09e-05	173	148.66	293.04	248.36	Promoter (<=1kb)	8	11477929	11480241	2313	1	102132	uc009kve.1	0	ENSMUSG00000096957	E230013L22Rik	RIKEN cDNA E230013L22 gene	uc009kve.1;uc009kvd.1	102132;19332	0;0
chr17	35307049	35346617	39569	*	9.45	9.22	9.64	-0.42	6.5e-06	7.27e-05	603	589.32	818.18	781.24	Promoter (<=1kb)	17	35320558	35325099	4542	1	15006	uc008chj.2	0	ENSMUSG00000079507	H2-Q1	histocompatibility 2, Q region locus 1	uc029thj.1;uc008chj.2;uc012ard.1;uc057kxq.1;uc008chl.1;uc008chb.2	14980;15006;15006;15006;15013;53817	0;0;0;0;0;0
chr8	117462300	117528559	66260	*	10.18	9.98	10.35	-0.37	6.51e-06	7.28e-05	963	1059.35	1366.03	1250.82	Promoter (<=1kb)	8	117498275	117635142	136868	1	234779	uc009npc.2	0	ENSMUSG00000034330	Plcg2	phospholipase C, gamma 2	uc033jib.1;uc009npc.2;uc012gln.2;uc009npa.3;uc009npb.3	102465653;234779;74440;74440;74440	3035;0;0;113130;15321
chr15	89377414	89389587	12174	*	7.82	7.43	8.12	-0.69	6.61e-06	7.39e-05	173	171.81	277.53	280.31	Promoter (<=1kb)	15	89386891	89388708	1818	1	546648	uc011zxw.1	0	ENSMUSG00000091680	Klhdc7b	kelch domain containing 7B	uc007xgg.3;uc007xgh.3;uc007xgi.3;uc007xgk.3;uc011zxw.1;uc007xgm.1;uc007xgn.1;uc007xgl.3;uc007xgo.2;uc007xgp.2	52683;52683;52683;52683;546648;70113;70113;72962;75459;75459	21695;21695;21695;21695;0;0;0;-378;20676;20916
chr1	69096694	69120635	23942	*	8.92	8.65	9.15	-0.5	6.99e-06	7.81e-05	421	383.68	553.39	583.52	Promoter (<=1kb)	1	68032186	69108059	1075874	2	13869	uc007bjb.3	0	ENSMUSG00000062209	Erbb4	erb-b2 receptor tyrosine kinase 4	uc007bjb.3	13869	0
chr18	61392765	61409910	17146	*	8.04	7.68	8.33	-0.65	7.06e-06	7.87e-05	202	208.31	331.26	311.65	Promoter (<=1kb)	18	61298136	61400431	102296	2	170826	uc008fbx.1	0	ENSMUSG00000033871	Ppargc1b	peroxisome proliferative activated receptor, gamma, coactivator 1 beta	uc008fbx.1;uc012bdq.1;uc033hhn.1	170826;170826;723889	0;0;0
chr15	76288745	76297978	9234	*	7.3	6.83	7.66	-0.83	7.19e-06	8.01e-05	108	119.29	206.07	198.32	Promoter (<=1kb)	15	76294434	76296896	2463	1	100503915	uc011zut.1	0	ENSMUSG00000071724	Smpd5	sphingomyelin phosphodiesterase 5	uc011zut.1;uc056yzd.1;uc007wjm.1;uc011zus.1;uc007wjo.1	100503915;100526548;74281;74281;75475	0;0;0;0;0
chr16	43972172	43982565	10394	*	7.5	7.05	7.84	-0.79	7.21e-06	8.02e-05	123	141.54	241.52	217.01	Promoter (<=1kb)	16	43969146	43979077	9932	2	332175	uc007zgp.1	0	ENSMUSG00000036304	Zdhhc23	zinc finger, DHHC domain containing 23	uc007zgt.2;uc012afw.1;uc007zgp.1;uc007zgq.1;uc012afu.1;uc012afv.1;uc057bij.1;uc007zgr.1	207798;207798;332175;332175;332175;332175;332175;332175	0;0;0;0;0;0;0;0
chr16	93678959	93685558	6600	*	7.26	6.77	7.62	-0.85	7.25e-06	8.07e-05	110	108.61	207.73	185.66	Promoter (<=1kb)	16	93683219	93690991	7773	1	109857	uc007zzs.2	0	ENSMUSG00000022947	Cbr3	carbonyl reductase 3	uc007zzs.2	109857	0
chr8	123232666	123238820	6155	*	7.16	6.65	7.54	-0.89	7.27e-06	8.08e-05	90	110.39	185.57	185.66	Promoter (<=1kb)	8	123235091	123242359	7269	1	71186	uc009nur.1	0	ENSMUSG00000097637	4933417D19Rik	RIKEN cDNA 4933417D19 gene	uc009num.1;uc009nun.2;uc009nuo.2;uc012gmo.1;uc009nur.1;uc009nus.4;uc009nut.3;uc009nuu.3;uc009nuv.3;uc009nuw.3;uc009nup.1;uc009nuq.1	234854;234854;234854;234854;71186;72325;72325;72325;72325;72325;78779;78779	0;0;0;0;0;15402;15402;15402;15402;15402;0;0
chr2	130695269	130700684	5416	*	6.83	6.26	7.24	-0.98	7.3e-06	8.11e-05	73	80.12	153.44	149.5	Promoter (<=1kb)	2	130684108	130697519	13412	2	269356	uc008mjv.1	0	ENSMUSG00000074796	Slc4a11	solute carrier family 4, sodium bicarbonate transporter-like, member 11	uc008mjv.1	269356	0
chr16	92496977	92502265	5289	*	6.78	6.16	7.22	-1.06	7.39e-06	8.19e-05	76	66.77	169.51	128.4	Promoter (<=1kb)	16	92498147	92541241	43095	1	209195	uc007zzg.1	0	ENSMUSG00000022949	Clic6	chloride intracellular channel 6	uc007zzg.1;uc007zzf.1	209195;76785	0;0
chr8	88574768	88786680	211913	*	11.91	11.81	12.01	-0.21	7.48e-06	8.3e-05	3455	3707.72	4137.97	4133.45	Promoter (<=1kb)	8	88647347	88665700	18354	1	257632	uc009mrq.1	0	ENSMUSG00000055994	Nod2	nucleotide-binding oligomerization domain containing 2	uc009mrq.1;uc009mrr.1;uc012gib.1;uc009mrs.1;uc009mrp.1;uc009mrt.3;uc009mru.3;uc009mrv.3;uc033jgr.2;uc033jgq.1;uc009mrx.3;uc009mry.1;uc009mro.2;uc012gia.1	257632;257632;257632;257632;71607;74256;74256;74256;74256;74256;74256;74256;93960;93960	0;0;0;0;0;0;0;0;0;0;0;0;0;0
chr1	91338832	91346674	7843	*	6.86	6.3	7.27	-0.97	7.6e-06	8.42e-05	78	79.23	160.64	147.69	3' UTR	1	91322075	91348303	26229	1	227357	uc007cah.1	16757	ENSMUSG00000049515	Espnl	espin-like	uc007cah.1;uc007cai.1	227357;70788	0;-4399
chr1	154190697	154208955	18259	*	7.98	7.61	8.28	-0.67	7.62e-06	8.43e-05	184	207.42	315.75	305.02	Promoter (<=1kb)	1	154201187	154205674	4488	1	100503355	uc029qug.1	0	ENSMUSG00000066797	Zfp648	zinc finger protein 648	uc029qug.1	100503355	0
chr11	97130179	97141901	11723	*	7.52	7.08	7.85	-0.77	7.81e-06	8.64e-05	129	142.43	233.21	229.07	3' UTR	11	97136171	97149712	13542	2	73174	uc011ydr.1	7811	ENSMUSG00000038517	Tbkbp1	TBK1 binding protein 1	uc033fzp.1;uc011ydr.1	102466822;73174	4518;0
chr3	88239492	88247846	8355	*	7	6.41	7.42	-1	7.84e-06	8.67e-05	69	101.48	183.91	157.94	3' UTR	3	88242874	88254684	11811	2	58176	uc008pui.1	6838	ENSMUSG00000104445	Rhbg	Rhesus blood group-associated B glycoprotein	uc008pui.1;uc012crp.1	58176;58176	0;0
chr11	121155246	121160014	4769	*	6.62	5.99	7.05	-1.07	7.89e-06	8.71e-05	62	64.99	137.38	128.4	Promoter (<=1kb)	11	121160271	121161973	1703	1	217369	uc007mvj.1	-257	ENSMUSG00000039321	Uts2r	urotensin 2 receptor	uc007mvj.1	217369	-257
chr17	35417832	35444740	26909	*	9.55	9.33	9.74	-0.41	7.94e-06	8.76e-05	641	647.18	877.45	832.48	Promoter (<=1kb)	17	35424877	35428382	3506	1	110557	uc008chp.3	0	ENSMUSG00000073409	H2-Q6	histocompatibility 2, Q region locus 6	uc008chp.3;uc008chq.3;uc008chr.1;uc057bjk.1;uc008chs.2;uc012arh.1;uc012ari.1;uc008chb.2	110557;110557;110557;15018;15018;15018;15018;53817	0;0;0;0;0;0;0;0
chr8	95522420	95806106	283687	*	12.38	12.29	12.46	-0.17	7.96e-06	8.78e-05	4962	5082.2	5712.83	5574.76	Promoter (<=1kb)	8	95753151	95753214	64	2	102465650	uc033jgz.1	0	ENSMUSG00000106145	Mir7073	microRNA 7073	uc033jgz.1;uc009mys.2;uc009myt.2;uc009myu.2;uc009myz.3;uc009mza.3;uc009mzd.3;uc012gis.2;uc009myy.1;uc029wva.1;uc009mze.3;uc009myn.1;uc009mzf.1;uc009myv.1;uc009myw.1;uc009myx.1;uc009myo.2;uc009myp.2;uc009myq.1;uc009myr.1	102465650;234593;234593;234593;234594;234594;234594;234594;234594;234594;234594;244608;319960;66083;66083;66083;70993;70993;70993;78833	0;0;0;0;0;0;0;0;0;0;0;0;-724;0;0;0;0;0;0;0
chr7	113758988	113771259	12272	*	7.77	7.35	8.1	-0.75	8.17e-06	8.99e-05	178	148.66	299.13	249.56	Promoter (<=1kb)	7	113765998	113929876	163879	1	233744	uc009jhu.2	0	ENSMUSG00000038156	Spon1	spondin 1, (f-spondin) extracellular matrix protein	uc009jhu.2;uc009jhv.2	233744;233744	0;0
chr14	39465713	39480907	15195	*	8.09	7.73	8.37	-0.64	8.34e-06	9.18e-05	211	214.54	347.32	315.27	Promoter (<=1kb)	14	38368951	39473088	1104138	2	18183	uc007tbz.2	0	ENSMUSG00000041014	Nrg3	neuregulin 3	uc007tbz.2;uc011zjc.1;uc011zjd.1;uc007tca.1;uc057beo.2	18183;18183;18183;18183;432842	0;0;0;0;0
chr5	72499231	72505494	6264	*	6.95	6.39	7.35	-0.95	8.42e-06	9.26e-05	79	89.02	173.38	151.91	Promoter (<=1kb)	5	72300025	72504208	204184	2	53419	uc008xrj.2	0	ENSMUSG00000005220	Corin	corin	uc008xrj.2;uc012dwx.1;uc008xrk.2	53419;53419;53419	0;0;0
chr15	76927356	76946361	19006	*	8.16	7.81	8.45	-0.63	8.44e-06	9.26e-05	219	230.56	370.59	326.72	Promoter (1-2kb)	15	76910370	76925448	15079	2	239546	uc011zvc.1	-1908	ENSMUSG00000054967	Zfp647	zinc finger protein 647	uc007wmv.2;uc007wmw.2;uc011zvd.2;uc007wmu.2;uc011zvc.1	117171;117171;117171;239546;239546	-2178;-2183;-2268;-1908;-1908
chr8	106583670	106618276	34607	*	9.35	9.12	9.55	-0.43	8.55e-06	9.38e-05	537	575.08	766.11	737.23	Promoter (<=1kb)	8	106603350	106670247	66898	1	12550	uc009ngi.2	0	ENSMUSG00000000303	Cdh1	cadherin 1	uc009ngi.2;uc029wvn.1	12550;68692	0;0
chr5	73394279	73411490	17212	*	8.13	7.77	8.41	-0.64	8.64e-06	9.47e-05	237	200.3	331.26	350.23	Promoter (<=1kb)	5	73406078	73453425	47348	1	231293	uc008xsx.1	0	ENSMUSG00000029154	Cwh43	cell wall biogenesis 43 C-terminal homolog	uc008xsx.1;uc012dxc.1	231293;231293	0;0
chr13	100544608	100555405	10798	*	7.7	7.3	8.02	-0.72	9e-06	9.86e-05	150	165.58	261.46	257.4	Promoter (<=1kb)	13	100497367	100552481	55115	2	18260	uc011zdx.1	0	ENSMUSG00000021638	Ocln	occludin	uc011zdx.1;uc007rqy.1;uc007rqz.1;uc011zdy.1	18260;18260;18260;18260	0;0;0;0
chr5	115186976	115205832	18857	*	8.21	7.87	8.48	-0.62	9.01e-06	9.86e-05	223	243.92	372.8	343	Promoter (<=1kb)	5	115168691	115194381	25691	2	29867	uc057abi.1	0	ENSMUSG00000029544	Cabp1	calcium binding protein 1	uc008zdg.1;uc008zdh.1;uc012ecc.1;uc057abi.1	29867;29867;29867;29867	-855;-855;-855;0
chr15	85614841	85627349	12509	*	7.79	7.39	8.1	-0.71	9.05e-06	9.89e-05	171	165.58	294.14	256.19	Distal Intergenic	15	85535437	85581821	46385	2	22422	uc007xdg.2	-33020	ENSMUSG00000022382	Wnt7b	wingless-type MMTV integration site family, member 7B	NA	NA	NA
chr7	19400248	19407381	7134	*	7.25	6.77	7.61	-0.84	9.18e-06	0.0001	118	99.7	200.53	189.88	Promoter (<=1kb)	7	19394440	19404104	9665	2	232943	uc009flt.2	0	ENSMUSG00000040714	Klc3	kinesin light chain 3	uc009flu.1;uc009flq.1;uc009flr.1;uc012fbc.1;uc009fls.2;uc033iwy.1;uc009flt.2	12715;13871;13871;13871;232943;232943;232943	0;18209;18209;18209;-327;-327;0
chr3	141459939	141471385	11447	*	7.58	7.15	7.9	-0.75	9.25e-06	0.000101	148	136.2	252.6	226.66	Promoter (<=1kb)	3	141465564	141680798	215235	1	22253	uc008roc.1	0	ENSMUSG00000059921	Unc5c	unc-5 netrin receptor C	uc008roc.1;uc008roe.2;uc008rof.2;uc012cyo.2	22253;22253;22253;22253	0;0;0;0
chr6	91975576	91981325	5750	*	6.74	6.12	7.17	-1.05	9.3e-06	0.000101	67	72.11	161.75	126.59	Promoter (<=1kb)	6	91978965	92076005	97041	1	232237	uc009cyn.3	0	ENSMUSG00000034037	Fgd5	FYVE, RhoGEF and PH domain containing 5	uc009cyn.3	232237	0
chr9	70138173	70143654	5482	*	6.49	5.82	6.95	-1.13	9.43e-06	0.000103	64	48.96	122.42	124.18	Promoter (<=1kb)	9	70089310	70141557	52248	2	76886	uc009qnu.1	0	ENSMUSG00000032224	Fam81a	family with sequence similarity 81, member A	uc009qnu.1	76886	0
chr2	52667671	52678110	10440	*	7.66	7.25	7.99	-0.74	9.47e-06	0.000103	137	166.47	255.92	251.97	Promoter (<=1kb)	2	52428320	52675859	247540	2	12298	uc008jrc.1	0	ENSMUSG00000017412	Cacnb4	calcium channel, voltage-dependent, beta 4 subunit	uc008jrc.1;uc033hmw.1;uc008jrd.2	12298;12298;12298	0;0;0
chr4	133599040	133603317	4278	*	6.28	5.54	6.77	-1.23	9.53e-06	0.000104	54	39.17	111.34	107.3	Promoter (<=1kb)	4	133600556	133602168	1613	2	55948	uc008vdc.1	0	ENSMUSG00000047281	Sfn	stratifin	uc008vdd.1;uc008vde.1;uc008vdc.1	503610;503610;55948	7165;30112;0
chr4	55527882	55532059	4178	*	6.33	5.61	6.8	-1.2	9.66e-06	0.000105	52	45.4	119.1	104.29	Promoter (<=1kb)	4	55527137	55532475	5339	2	16600	uc008sxk.2	416	ENSMUSG00000003032	Klf4	Kruppel-like factor 4 (gut)	uc008sxk.2	16600	0
chr1	33903987	33911268	7282	*	7.3	6.84	7.65	-0.82	9.69e-06	0.000105	112	116.62	207.18	195.31	Promoter (<=1kb)	1	33908225	34308662	400438	1	13518	uc007aon.2	0	ENSMUSG00000026131	Dst	dystonin	uc007aon.2;uc007aoc.2;uc007aod.2;uc011wiz.2	13518;320705;320705;320705	0;0;0;0
chr10	23339324	23351754	12431	*	7.94	7.57	8.24	-0.67	9.88e-06	0.000107	185	194.07	319.63	283.92	Promoter (<=1kb)	10	23104168	23349903	245736	2	14051	uc007ept.1	0	ENSMUSG00000010461	Eya4	EYA transcriptional coactivator and phosphatase 4	uc007ept.1;uc007epu.1	14051;14051	0;0
chr18	46847803	46851622	3820	*	6.57	5.93	7.01	-1.09	1e-05	0.000109	62	59.64	139.59	118.75	Promoter (<=1kb)	18	46850039	46881736	31698	1	74574	uc008evx.1	0	ENSMUSG00000024481	Lvrn	laeverin	uc008evx.1;uc012bcu.1	74574;74574	0;0
chr6	39860671	39875460	14790	*	8.18	7.82	8.46	-0.64	1e-05	0.000109	221	230.56	383.88	321.3	Distal Intergenic	6	39801804	39810936	9133	2	14548	uc009bmi.3	-49735	ENSMUSG00000029918	Mrps33	mitochondrial ribosomal protein S33	NA	NA	NA
chr8	117011535	117052844	41310	*	9.6	9.36	9.79	-0.43	1.02e-05	0.00011	633	685.46	942.81	833.68	Promoter (<=1kb)	8	117009323	117024091	14769	2	76645	uc012glj.1	0	ENSMUSG00000034416	Pkd1l2	polycystic kidney disease 1 like 2	uc012gli.1;uc012glj.1;uc012glk.1;uc009nov.1	76645;76645;76645;76645	0;0;0;0
chr4	154326006	154340650	14645	*	7.73	7.31	8.05	-0.73	1.02e-05	0.000111	147	170.92	281.4	247.15	Promoter (<=1kb)	4	154316125	154334852	18728	2	70673	uc008wbs.1	0	ENSMUSG00000039410	Prdm16	PR domain containing 16	uc008wbs.1;uc008wbt.1;uc008wbu.1;uc008wbv.1;uc008wbw.1;uc008wbx.1	70673;70673;70673;70673;70673;70673	0;0;0;0;0;0
chr3	157562246	157571563	9318	*	7.36	6.9	7.7	-0.8	1.03e-05	0.000111	128	111.28	205.51	211.59	Promoter (<=1kb)	3	157566892	157607595	40704	1	19218	uc008rvg.1	0	ENSMUSG00000040016	Ptger3	prostaglandin E receptor 3 (subtype EP3)	uc008rvg.1;uc008rvh.1;uc008rvi.1	19218;19218;19218	0;0;0
chr8	123103547	123137433	33887	*	9.46	9.22	9.67	-0.45	1.06e-05	0.000114	549	645.4	838.12	791.49	Promoter (<=1kb)	8	123117374	123135185	17812	1	102278	uc009nuf.1	0	ENSMUSG00000034796	Cpne7	copine VII	uc012gmm.1;uc009nuf.1;uc009nug.1;uc033jik.1;uc033jil.1;uc009nue.3	100302565;102278;102278;102465654;102465655;270106	489;0;0;0;0;0
chr7	45694601	45700792	6192	*	6.77	6.18	7.19	-1.01	1.06e-05	0.000115	81	64.1	152.33	139.25	Promoter (<=1kb)	7	45699967	45704671	4705	1	12348	uc009gwr.2	0	ENSMUSG00000003273	Car11	carbonic anhydrase 11	uc009gwr.2;uc009gws.2;uc009gwp.2;uc009gwq.2;uc012fko.2;uc057bzy.1;uc009gwo.2	12348;13170;243967;243967;243967;243967;56546	0;-4455;10579;10579;10579;10579;-199
chr3	100486122	100491592	5471	*	6.78	6.2	7.19	-0.98	1.07e-05	0.000115	75	72.11	150.67	140.45	Promoter (<=1kb)	3	100471536	100489192	17657	2	74645	uc008qqu.2	0	ENSMUSG00000044468	Tent5c	terminal nucleotidyltransferase 5C	uc008qqu.2	74645	0
chr13	35966200	35974433	8234	*	7.17	6.67	7.54	-0.87	1.09e-05	0.000117	95	108.61	196.1	175.42	Promoter (<=1kb)	13	35967906	35970388	2483	1	76487	uc007qci.2	0	ENSMUSG00000050423	Ppp1r3g	protein phosphatase 1, regulatory subunit 3G	uc007qcj.1;uc007qci.2	380840;76487	142924;0
chr11	90380384	90401069	20686	*	8.33	8	8.59	-0.59	1.09e-05	0.000118	249	262.61	408.81	362.89	Promoter (<=1kb)	11	90336535	90389648	53114	2	217082	uc007kwq.1	0	ENSMUSG00000003949	Hlf	hepatic leukemia factor	uc007kwq.1;uc007kwr.1;uc007kws.1;uc007kwt.2	217082;217082;217082;217082	0;0;0;0
chr6	28974623	28997939	23317	*	8.49	8.2	8.74	-0.54	1.11e-05	0.00012	296	291.1	435.95	419.55	Distal Intergenic	6	29022619	29022691	73	1	387237	uc012eiv.1	-24680	ENSMUSG00000065469	Mir129-1	microRNA 129-1	NA	NA	NA
chr17	25565533	25581581	16049	*	7.81	7.41	8.13	-0.72	1.13e-05	0.000121	158	181.6	303.56	256.19	Promoter (<=1kb)	17	25565893	25570686	4794	2	20681	uc008bay.1	0	ENSMUSG00000024176	Sox8	SRY (sex determining region Y)-box 8	uc008bay.1;uc008bba.1;uc008bbb.2;uc008bbc.2;uc008bbd.2;uc008bbf.3;uc033hbx.1	20681;20681;72834;76483;76483;76483;76483	0;0;0;0;0;0;0
chr7	25366768	25372334	5567	*	6.57	5.94	7	-1.06	1.14e-05	0.000122	63	59.64	132.39	124.18	Promoter (<=1kb)	7	25367616	25369724	2109	2	72383	uc009fsl.1	0	ENSMUSG00000063651	Cnfn	cornifelin	uc009fsj.2;uc009fsk.2;uc009fsn.1;uc009fso.1;uc009fsl.1;uc009fsm.1	269878;269878;654804;654804;72383;72383	49604;20787;-4485;-4485;0;0
chr10	95262169	95266557	4389	*	6.63	6.02	7.06	-1.04	1.14e-05	0.000122	63	66.77	128.52	138.65	Intron (uc007gwa.1/12905, intron 1 of 1)	10	95174746	95322965	148220	2	12905	uc007gwa.1	56408	ENSMUSG00000045867	Cradd	CASP2 and RIPK1 domain containing adaptor with death domain	uc007gwa.1;uc007gwb.1;uc007gwc.1	12905;12905;12905	0;0;0
chr5	128589841	128603293	13453	*	7.86	7.47	8.17	-0.69	1.15e-05	0.000123	182	173.59	310.21	264.63	Promoter (<=1kb)	5	128579130	128600687	21558	2	319616	uc008zsg.1	0	ENSMUSG00000072591	5930412G12Rik	RIKEN cDNA 5930412G12 gene	uc012edu.1;uc012edv.1;uc008zsg.1;uc012edw.1;uc008zsh.1	319616;319616;319616;319616;93897	-4435;-4435;0;0;0
chr2	168047425	168051742	4318	*	6.43	5.75	6.89	-1.14	1.15e-05	0.000123	54	53.41	129.62	107.9	Exon (uc057leu.1/uc057leu.1, exon 1 of 2)	2	168081004	168101203	20200	1	58220	uc008oao.2	-29262	ENSMUSG00000044641	Pard6b	par-6 family cell polarity regulator beta	NA	NA	NA
chr19	25494940	25508732	13793	*	7.95	7.58	8.24	-0.66	1.17e-05	0.000125	193	190.5	321.29	285.13	Promoter (<=1kb)	19	25505706	25560265	54560	1	50796	uc008hbi.1	0	ENSMUSG00000024837	Dmrt1	doublesex and mab-3 related transcription factor 1	uc008hbi.1;uc012bju.1;uc012bjv.1	50796;50796;50796	0;0;0
chr5	25096778	25107390	10613	*	7.54	7.08	7.89	-0.8	1.17e-05	0.000125	117	154.01	253.15	220.02	Promoter (<=1kb)	5	24862735	25100642	237908	2	108099	uc008wsm.2	0	ENSMUSG00000028944	Prkag2	protein kinase, AMP-activated, gamma 2 non-catalytic subunit	uc008wsm.2;uc008wsq.2	108099;67261	0;0
chr18	61683229	61692968	9740	*	6.97	6.43	7.37	-0.94	1.17e-05	0.000125	77	95.25	173.94	156.13	Promoter (<=1kb)	18	61687915	61692537	4623	1	56069	uc008fck.1	0	ENSMUSG00000024578	Il17b	interleukin 17B	uc008fcm.1;uc008fck.1;uc008fcl.1	240334;56069;56069	14667;0;0
chr19	3318810	3326699	7890	*	7.15	6.64	7.53	-0.89	1.18e-05	0.000126	105	94.36	202.74	165.77	Promoter (<=1kb)	19	3323301	3385733	62433	1	12894	uc008fwf.2	0	ENSMUSG00000024900	Cpt1a	carnitine palmitoyltransferase 1a, liver	uc008fwf.2	12894	0
chr1	17091212	17101587	10376	*	7.76	7.37	8.06	-0.69	1.19e-05	0.000127	168	163.8	274.76	260.41	Promoter (<=1kb)	1	16994938	17097889	102952	2	57339	uc007aka.3	0	ENSMUSG00000042686	Jph1	junctophilin 1	uc007aka.3	57339	0
chr14	27039719	27069332	29614	*	8.81	8.54	9.04	-0.5	1.2e-05	0.000128	384	359.64	547.85	505.15	Promoter (<=1kb)	14	27067397	27100974	33578	1	171463	uc007stm.1	0	ENSMUSG00000040717	Il17rd	interleukin 17 receptor D	uc007stk.1;uc007stl.1;uc007stm.1	171463;171463;171463	0;0;0
chr16	38474383	38488105	13723	*	7.87	7.5	8.17	-0.67	1.2e-05	0.000128	173	187.83	298.02	277.29	3' UTR	16	38455561	38495739	40179	1	12519	uc007zez.2	18822	ENSMUSG00000075122	Cd80	CD80 antigen	uc007zez.2;uc007zfa.2;uc012afo.1	12519;12519;12519	0;0;0
chr19	47340492	47347843	7352	*	6.97	6.42	7.36	-0.94	1.23e-05	0.00013	88	83.68	181.69	147.69	Exon (uc008huz.2/14218, exon 6 of 15)	19	47260174	47464411	204238	2	14218	uc008huz.2	116568	ENSMUSG00000053617	Sh3pxd2a	SH3 and PX domains 2A	uc008huz.2;uc008hva.2	14218;14218	0;0
chr1	86008760	86025603	16844	*	8.04	7.69	8.32	-0.63	1.25e-05	0.000133	211	202.97	327.94	311.65	Promoter (<=1kb)	1	86021942	86024669	2728	1	70060	uc007bur.2	0	ENSMUSG00000026226	Spata3	spermatogenesis associated 3	uc007bur.2;uc007bus.2;uc007buu.2;uc007but.2;uc007buv.2;uc007buw.2	70060;70060;70060;70060;70060;70060	0;0;0;0;0;0
chr14	54778155	54791007	12853	*	8	7.65	8.29	-0.64	1.27e-05	0.000135	213	187.83	315.75	309.24	Promoter (<=1kb)	14	54722215	54781886	59672	2	50934	uc007txa.1	0	ENSMUSG00000022180	Slc7a8	solute carrier family 7 (cationic amino acid transporter, y+ system), member 8	uc007txa.1;uc007txb.1	50934;50934	0;0
chr8	121768920	121790599	21680	*	8.45	8.15	8.7	-0.55	1.27e-05	0.000135	279	290.21	409.36	423.17	3' UTR	8	121730559	121791083	60525	1	57340	uc009nrz.2	38361	ENSMUSG00000025318	Jph3	junctophilin 3	uc009nrz.2	57340	0
chr14	56353516	56367824	14309	*	8.02	7.68	8.3	-0.63	1.28e-05	0.000135	205	203.86	311.87	320.09	Promoter (<=1kb)	14	56365068	56388551	23484	1	192113	uc007ubw.2	0	ENSMUSG00000022229	Atp12a	ATPase, H+/K+ transporting, nongastric, alpha polypeptide	uc007ubw.2	192113	0
chr2	132940939	132949765	8827	*	7.42	6.99	7.75	-0.77	1.29e-05	0.000137	127	126.41	214.38	217.01	Promoter (<=1kb)	2	132904179	132946036	41858	2	241639	uc008mno.1	0	ENSMUSG00000027356	Fermt1	fermitin family member 1	uc008mno.1;uc008mnp.1	241639;241639	0;0
chr13	51560641	51575869	15229	*	8.13	7.79	8.4	-0.61	1.32e-05	0.00014	230	213.65	345.11	331.54	Promoter (<=1kb)	13	51431041	51567084	136044	2	20418	uc007qmg.2	0	ENSMUSG00000021448	Shc3	src homology 2 domain-containing transforming protein C3	uc007qmg.2;uc011yzj.2	20418;20418	0;0
chr13	117017512	117031895	14384	*	8.09	7.75	8.37	-0.62	1.33e-05	0.00014	208	222.55	332.92	327.32	Promoter (<=1kb)	13	116854824	117025277	170454	2	52552	uc007ryi.1	0	ENSMUSG00000021725	Parp8	poly (ADP-ribose) polymerase family, member 8	uc007ryi.1;uc007ryj.1;uc007ryk.1;uc007ryl.1	52552;52552;52552;52552	0;0;0;0
chr2	118778743	118798157	19415	*	8.1	7.76	8.37	-0.62	1.33e-05	0.00014	222	210.98	340.68	322.5	Promoter (<=1kb)	2	118779719	118795175	15457	1	214240	uc008lsr.2	0	ENSMUSG00000040035	Disp2	dispatched RND tramsporter family member 2	uc008lsr.2;uc008lss.2;uc008lsp.1;uc008lsq.1;uc033hpm.2	214240;214240;214240;214240;53906	0;0;0;0;5974
chr8	55849962	56134133	284172	*	12.56	12.64	12.48	0.16	1.34e-05	0.000142	6523	6210.1	5672.39	5714.61	Promoter (<=1kb)	8	55940825	56125352	184528	1	110304	uc009lsn.1	0	ENSMUSG00000038257	Glra3	glycine receptor, alpha 3 subunit	uc009lsn.1;uc009lsm.2	110304;244486	0;0
chr6	120290937	120296402	5466	*	6.56	5.94	6.99	-1.06	1.35e-05	0.000142	61	61.42	124.08	130.81	Promoter (<=1kb)	6	120203810	120294559	90750	2	330406	uc009dmy.1	0	ENSMUSG00000041372	B4galnt3	beta-1,4-N-acetyl-galactosaminyl transferase 3	uc009dmy.1;uc012erx.1	330406;330406	0;0
chr16	22430490	22445901	15412	*	7.78	7.39	8.08	-0.69	1.36e-05	0.000144	167	168.25	286.94	254.99	Promoter (<=1kb)	16	22381313	22436560	55248	2	104156	uc012adn.1	0	ENSMUSG00000013089	Etv5	ets variant 5	uc012adn.1;uc007yse.1	104156;104156	0;0
chr2	121274888	121302614	27727	*	8.74	8.45	8.98	-0.52	1.37e-05	0.000144	349	350.74	538.99	467.78	Promoter (<=1kb)	2	121289602	121310832	21231	1	17754	uc008lyi.2	0	ENSMUSG00000027254	Map1a	microtubule-associated protein 1 A	uc008lyi.2;uc008lyj.2;uc008lye.4;uc012cco.3;uc008lyg.3;uc008lyh.3	17754;17754;27223;27223;27223;27223	0;0;-3481;-3481;-3481;-3481
chr9	59573797	59588992	15196	*	7.98	7.62	8.26	-0.65	1.4e-05	0.000147	200	192.29	325.17	289.95	Promoter (<=1kb)	9	59578337	59607292	28956	1	76183	uc009pxx.1	0	ENSMUSG00000032297	Celf6	CUGBP, Elav-like family member 6	uc009pxx.1;uc009pxy.2;uc012guo.2	76183;76183;76183	0;0;0
chr7	65858516	65882463	23948	*	8.52	8.23	8.77	-0.54	1.41e-05	0.000148	302	298.22	450.36	420.16	Promoter (<=1kb)	7	65862136	66050386	188251	1	18553	uc009hgw.2	0	ENSMUSG00000030513	Pcsk6	proprotein convertase subtilisin/kexin type 6	uc009hgw.2;uc009hgx.2	18553;18553	0;0
chr3	153970567	153979015	8449	*	7.12	6.62	7.48	-0.86	1.43e-05	0.00015	102	95.25	170.06	188.08	Promoter (<=1kb)	3	153973436	154271722	298287	1	242259	uc008ruk.2	0	ENSMUSG00000028360	Slc44a5	solute carrier family 44, member 5	uc008ruk.2	242259	0
chr4	143348366	143354943	6578	*	6.98	6.42	7.38	-0.96	1.43e-05	0.00015	81	90.8	188.9	144.67	Promoter (<=1kb)	4	143349750	143371028	21279	1	242735	uc008vqb.2	0	ENSMUSG00000028584	Lrrc38	leucine rich repeat containing 38	uc008vqb.2	242735	0
chr11	69933226	69938619	5394	*	6.65	6.05	7.07	-1.03	1.43e-05	0.00015	71	61.42	141.26	128.4	Promoter (<=1kb)	11	69935899	69941599	5701	1	53422	uc007jsw.1	0	ENSMUSG00000018554	Ybx2	Y box protein 2	uc007jsy.1;uc007jsz.1;uc007jsw.1;uc057kll.1;uc057klm.1;uc007jsx.1	20528;20528;53422;53422;53422;53422	9515;9571;0;0;0;-1925
chr7	109862490	109868532	6043	*	6.8	6.24	7.21	-0.97	1.44e-05	0.000151	69	81.9	153.44	142.87	Promoter (<=1kb)	7	109798690	109865679	66990	2	56788	uc009jei.3	0	ENSMUSG00000007279	Scube2	signal peptide, CUB domain, EGF-like 2	uc009jei.3;uc009jej.3	56788;56788	0;0
chr7	4981482	4998992	17511	*	8.07	7.72	8.36	-0.64	1.44e-05	0.000151	192	228.78	337.91	318.28	Promoter (<=1kb)	7	4992852	4996101	3250	2	68490	uc009ezc.1	0	ENSMUSG00000051550	Zfp579	zinc finger protein 579	uc009ezc.1;uc009ezd.1	68490;68490	0;0
chr6	114275324	114290574	15251	*	7.9	7.52	8.2	-0.67	1.47e-05	0.000154	190	178.04	315.19	271.87	Promoter (<=1kb)	6	114282635	114307118	24484	1	232333	uc009dht.2	0	ENSMUSG00000030310	Slc6a1	solute carrier family 6 (neurotransmitter transporter, GABA), member 1	uc009dht.2;uc009dhu.2;uc009dhv.2	232333;232333;232333	0;0;0
chr5	137282632	137292799	10168	*	7.5	7.06	7.84	-0.78	1.48e-05	0.000154	125	141.54	248.17	209.17	Promoter (<=1kb)	5	137287766	137291101	3336	1	11423	uc009abt.1	0	ENSMUSG00000023328	Ache	acetylcholinesterase	uc033imz.1;uc033imy.1;uc009abt.1;uc009abu.2;uc009abv.2;uc009abw.1;uc009abx.2;uc009aby.1;uc009abz.1;uc009acb.2;uc009acc.2;uc012eew.1	102465627;102466887;11423;11423;11423;11423;11423;11423;70240;83701;83701;83701	3889;-981;0;0;0;0;0;0;-1870;14875;14875;14875
chr4	57428667	57436392	7726	*	7.2	6.72	7.55	-0.83	1.48e-05	0.000155	110	101.48	192.77	182.65	Promoter (<=1kb)	4	57434475	57692438	257964	1	677884	uc008syf.1	0	ENSMUSG00000089945	Pakap	paralemmin A kinase anchor protein	uc008syf.1	677884	0
chr5	139971844	139978677	6834	*	6.71	6.13	7.13	-1	1.49e-05	0.000155	67	73	135.72	143.47	3' UTR	5	139907943	139974725	66783	1	243312	uc009ahi.3	63901	ENSMUSG00000048988	Elfn1	leucine rich repeat and fibronectin type III, extracellular 1	uc009ahi.3	243312	0
chr17	28516423	28525073	8651	*	7.2	6.71	7.57	-0.86	1.5e-05	0.000156	120	89.02	190.56	188.68	Promoter (<=1kb)	17	28398753	28517524	118772	2	14229	uc008bra.3	0	ENSMUSG00000024222	Fkbp5	FK506 binding protein 5	uc008bra.3	14229	0
chr2	180451780	180458430	6651	*	7.06	6.53	7.44	-0.91	1.53e-05	0.00016	96	89.02	192.77	154.32	Promoter (<=1kb)	2	180456334	180474852	18519	1	108115	uc008ojc.3	0	ENSMUSG00000038963	Slco4a1	solute carrier organic anion transporter family, member 4a1	uc008ojc.3;uc008ojd.3;uc008oje.3	108115;108115;108115	0;0;-2548
chr5	57702080	57756161	54082	*	9.98	9.78	10.16	-0.37	1.54e-05	0.00016	942	821.66	1157.74	1124.84	Promoter (<=1kb)	5	57570084	57717919	147836	2	319216	uc008xls.1	0	ENSMUSG00000097216	4932441J04Rik	RIKEN cDNA 4932441J04 gene	uc008xls.1;uc008xlt.3;uc008xlu.3;uc008xlv.3;uc057bug.1	319216;54216;54216;54216;54216	0;0;0;0;0
chr2	37759187	37775527	16341	*	7.75	7.37	8.05	-0.69	1.57e-05	0.000163	171	159.35	275.31	256.19	Promoter (<=1kb)	2	37776249	37799103	22855	1	241324	uc008jnf.2	-722	ENSMUSG00000035403	Crb2	crumbs family member 2	uc008jnf.2	241324	0
chr1	78308113	78313989	5877	*	6.92	6.38	7.31	-0.93	1.59e-05	0.000165	76	90.8	162.31	154.92	Promoter (<=1kb)	1	78310346	78420286	109941	1	433323	uc007bqe.1	0	ENSMUSG00000032908	Sgpp2	sphingosine-1-phosphate phosphotase 2	uc007bqe.1	433323	0
chr16	97761335	97765807	4473	*	6.65	6.05	7.07	-1.02	1.59e-05	0.000165	73	59.64	134.05	135.03	Promoter (<=1kb)	16	97741942	97763755	21814	2	72388	uc008adn.1	0	ENSMUSG00000005251	Ripk4	receptor-interacting serine-threonine kinase 4	uc008adn.1	72388	0
chr11	69194610	69217759	23150	*	8.44	8.14	8.69	-0.54	1.62e-05	0.000168	279	286.65	408.81	414.73	Promoter (<=1kb)	11	69183885	69197385	13501	2	11688	uc007jpl.1	0	ENSMUSG00000020891	Alox8	arachidonate 8-lipoxygenase	uc007jpl.1;uc007jpm.2;uc007jpn.2	11688;11688;14919	0;0;0
chr5	100152249	100164999	12751	*	7.77	7.39	8.08	-0.69	1.63e-05	0.000169	167	167.36	289.16	251.37	Promoter (<=1kb)	5	100077872	100159808	81937	2	231503	uc008yhc.2	0	ENSMUSG00000050640	Tmem150c	transmembrane protein 150C	uc008yhc.2;uc008yhd.2;uc008yhg.1	231503;231503;231503	0;0;0
chr17	28767938	28771732	3795	*	6.21	5.41	6.72	-1.31	1.64e-05	0.00017	37	48.07	124.08	86.8	Promoter (<=1kb)	17	28769317	28778704	9388	1	26415	uc008bro.2	0	ENSMUSG00000004864	Mapk13	mitogen-activated protein kinase 13	uc008bro.2	26415	0
chr9	46442773	46445914	3142	*	6.41	5.75	6.86	-1.11	1.64e-05	0.00017	55	52.52	114.11	118.15	Distal Intergenic	9	46303361	46319986	16626	2	74361	uc012gsl.1	-122787	ENSMUSG00000056617	4931429L15Rik	RIKEN cDNA 4931429L15 gene	NA	NA	NA
chr4	154498644	154509440	10797	*	7.32	6.86	7.68	-0.82	1.64e-05	0.00017	104	128.19	214.93	194.1	Intron (uc008wbu.1/70673, intron 2 of 16)	4	154316125	154636873	320749	2	70673	uc008wbu.1	127433	ENSMUSG00000039410	Prdm16	PR domain containing 16	uc008wbu.1;uc008wbv.1;uc008wbw.1;uc008wbx.1	70673;70673;70673;70673	0;0;0;0
chr2	13002184	13028874	26691	*	8.98	8.72	9.19	-0.47	1.67e-05	0.000172	444	399.7	598.26	571.46	Promoter (<=1kb)	2	13001887	13010864	8978	2	227580	uc008ijv.1	0	ENSMUSG00000049630	C1ql3	C1q-like 3	uc008ijt.2;uc008iju.2;uc012bqx.2;uc008ijv.1	19212;19212;19212;227580	0;0;0;0
chr12	30872024	30887806	15783	*	8.36	8.04	8.62	-0.58	1.67e-05	0.000173	254	274.18	416.57	370.73	Promoter (<=1kb)	12	30884324	30893854	9531	1	100294583	uc007ngv.1	0	ENSMUSG00000054204	Alkal2	ALK and LTK ligand 2	uc007ngv.1	100294583	0
chr2	4713071	4733979	20909	*	8.46	8.17	8.71	-0.54	1.69e-05	0.000174	295	281.31	419.89	415.94	Promoter (<=1kb)	2	4717831	4788933	71103	1	209645	uc008iey.2	0	ENSMUSG00000048186	Bend7	BEN domain containing 7	uc008iey.2;uc008iez.2;uc008ifa.2	209645;209645;209645	0;0;0
chr14	47370563	47383745	13183	*	7.78	7.37	8.09	-0.72	1.7e-05	0.000175	150	181.6	292.48	252.58	Promoter (<=1kb)	14	47373860	47386167	12308	1	16854	uc007tia.2	0	ENSMUSG00000050335	Lgals3	lectin, galactose binding, soluble 3	uc007tia.2;uc007tib.2;uc007tic.2;uc007tid.1;uc011zjn.1	16854;16854;16854;218977;218977	0;0;0;34662;34662
chr12	115586056	115665301	79246	*	12.02	12.11	11.92	0.19	1.72e-05	0.000177	4351	4491.11	3797.84	3970.08	Exon (uc057kpk.1/uc057kpk.1, exon 41 of 1341)	12	115695720	115695794	75	2	102465205	uc033ggj.1	30493	ENSMUSG00000098336	Mir6388	microRNA 6388	NA	NA	NA
chr12	76814447	76838277	23831	*	8.33	8.01	8.59	-0.59	1.72e-05	0.000177	234	280.42	388.32	383.99	Promoter (<=1kb)	12	76797963	76822524	24562	2	104886	uc007nyt.3	0	ENSMUSG00000021062	Rab15	RAB15, member RAS oncogene family	uc007nyt.3;uc007nyu.1	104886;110606	0;0
chr9	67047197	67053353	6157	*	6.93	6.38	7.32	-0.95	1.72e-05	0.000177	79	87.24	177.26	142.87	Promoter (<=1kb)	9	67022593	67049213	26621	2	22003	uc009qfp.1	0	ENSMUSG00000032366	Tpm1	tropomyosin 1, alpha	uc012gvr.1;uc012gvs.1;uc009qfp.1;uc012gvt.1;uc012gvu.1;uc012gvv.1;uc012gvw.1;uc012gvx.1;uc009qfq.2;uc009qfr.2;uc057lzu.1;uc009qfs.1	22003;22003;22003;22003;22003;22003;22003;22003;22003;22003;22003;22003	-3326;-3326;0;0;0;-3326;0;-3326;0;0;0;0
chr1	181344659	181358357	13699	*	7.92	7.56	8.21	-0.65	1.73e-05	0.000178	180	197.63	306.33	286.33	Promoter (<=1kb)	1	181352628	181460641	108014	1	72978	uc007dxh.2	0	ENSMUSG00000026514	Cnih3	cornichon family AMPA receptor auxiliary protein 3	uc007dxh.2;uc007dxi.2;uc011wxs.1	72978;72978;72978	0;0;0
chr12	78901205	78914734	13530	*	8.01	7.66	8.29	-0.63	1.74e-05	0.000179	215	190.5	316.86	309.84	Promoter (<=1kb)	12	78888697	78906938	18242	2	27260	uc007nzl.2	0	ENSMUSG00000021118	Plek2	pleckstrin 2	uc007nzl.2	27260	0
chr17	26107481	26116776	9296	*	7.39	6.93	7.73	-0.8	1.75e-05	0.00018	127	117.51	192.77	232.68	Promoter (<=1kb)	17	26113316	26123254	9939	1	60455	uc008bdj.3	0	ENSMUSG00000024180	Tmem8	transmembrane protein 8	uc008bdj.3;uc008bdk.2	60455;60455	0;0
chr4	120644255	120661304	17050	*	8.08	7.72	8.37	-0.65	1.79e-05	0.000183	217	203.86	362.28	297.79	Distal Intergenic	4	120666563	120667820	1258	1	56222	uc008unl.1	-5259	ENSMUSG00000070803	Cited4	Cbp/p300-interacting transactivator, with Glu/Asp-rich carboxy-terminal domain, 4	NA	NA	NA
chr6	54940977	54946029	5053	*	6.65	6.06	7.07	-1.01	1.79e-05	0.000183	72	61.42	134.05	134.43	Exon (uc009caf.2/107607, exon 4 of 12)	6	54923942	54971661	47720	2	107607	uc009caf.2	25632	ENSMUSG00000038058	Nod1	nucleotide-binding oligomerization domain containing 1	uc009caf.2;uc009cag.2	107607;107607	0;0
chr10	81129309	81140547	11239	*	7.17	6.68	7.53	-0.85	1.83e-05	0.000187	93	112.17	193.88	176.02	Promoter (<=1kb)	10	81136271	81151657	15387	1	16969	uc007gfz.1	0	ENSMUSG00000035011	Zbtb7a	zinc finger and BTB domain containing 7a	uc007gfz.1;uc007gga.2;uc007ggb.1;uc007gfx.2;uc007gfy.2;uc011xjb.1	16969;16969;16969;26396;26396;26396	0;0;0;23362;23362;23362
chr8	107800901	108116932	316032	*	12.53	12.44	12.6	-0.16	1.84e-05	0.000188	5484	5659.95	6336.57	6114.27	Distal Intergenic	8	107580380	107588482	8103	2	17463	uc009nhz.2	-212419	ENSMUSG00000039067	Psmd7	proteasome (prosome, macropain) 26S subunit, non-ATPase, 7	NA	NA	NA
chr11	89296355	89312271	15917	*	7.91	7.53	8.21	-0.68	1.84e-05	0.000189	199	170.92	323.5	270.66	Promoter (<=1kb)	11	89300638	89302559	1922	2	18121	uc007kwh.2	0	ENSMUSG00000048616	Nog	noggin	uc007kwh.2	18121	0
chr1	145492369	145512980	20612	*	8.34	8.59	8.04	0.55	1.85e-05	0.000189	389	381.01	264.23	262.82	Distal Intergenic	1	144752841	144775421	22581	2	64214	uc007cxl.1	-716948	ENSMUSG00000026357	Rgs18	regulator of G-protein signaling 18	NA	NA	NA
chr8	108645090	108706597	61508	*	10.26	10.1	10.41	-0.31	1.86e-05	0.00019	1111	1077.15	1371.57	1349.08	Distal Intergenic	8	108714644	108961636	246993	1	11906	uc009nid.1	-8047	ENSMUSG00000038872	Zfhx3	zinc finger homeobox 3	NA	NA	NA
chr18	78036782	78051654	14873	*	8.02	7.66	8.31	-0.65	1.86e-05	0.00019	199	204.75	344	289.35	Exon (uc008fsb.1/620235, exon 2 of 6)	18	78043614	78057268	13655	2	620235	uc008fsb.1	5614	ENSMUSG00000091055	Siglec15	sialic acid binding Ig-like lectin 15	uc008fsa.2;uc008fsb.1	100502841;620235	98315;0
chr6	83448861	83466143	17283	*	7.84	7.48	8.13	-0.66	1.88e-05	0.000192	182	174.48	273.65	288.14	Promoter (<=1kb)	6	83362373	83455480	93108	2	194388	uc033isq.2	0	ENSMUSG00000034832	Tet3	tet methylcytosine dioxygenase 3	uc033isq.2;uc057lqp.1;uc033isr.2;uc009cnm.1;uc012enz.1	194388;194388;194388;320775;320775	0;0;0;7106;7106
chr8	94908710	94930316	21607	*	8.66	8.38	8.89	-0.5	1.88e-05	0.000192	332	336.5	480.82	465.97	Promoter (<=1kb)	8	94902869	94918098	15230	2	234582	uc009mxh.2	0	ENSMUSG00000063605	Ccdc102a	coiled-coil domain containing 102A	uc009mxh.2;uc009mxi.2;uc009mxj.2;uc009mxk.2	234582;382045;382045;382045	0;0;0;0
chr15	80086990	80093195	6206	*	6.71	6.14	7.12	-0.99	1.89e-05	0.000193	65	75.67	143.47	135.63	Promoter (<=1kb)	15	80091334	80113440	22107	1	20972	uc007wvc.1	0	ENSMUSG00000022415	Syngr1	synaptogyrin 1	uc011zwg.2;uc007wvc.1;uc007wvd.1;uc011zwe.1;uc007wvb.2	100302600;20972;20972;27367;27367	-4084;0;0;-4408;-3584
chr7	28885696	28890384	4689	*	6.33	5.61	6.81	-1.2	1.89e-05	0.000193	46	51.63	129.62	95.24	Exon (uc012fgy.1/60594, exon 5 of 21)	7	28881656	28893585	11930	1	60594	uc012fgy.1	4040	ENSMUSG00000054083	Capn12	calpain 12	uc012fgy.1;uc009gah.1	60594;60595	0;71896
chr2	152907363	152925578	18216	*	7.82	7.4	8.14	-0.74	1.89e-05	0.000193	148	190.5	310.21	254.38	Promoter (<=1kb)	2	152911352	152923065	11714	1	228785	uc008ngs.2	0	ENSMUSG00000027470	Mylk2	myosin, light polypeptide kinase 2, skeletal muscle	uc008ngs.2	228785	0
chr9	89868404	89888607	20204	*	8.47	8.18	8.71	-0.54	1.9e-05	0.000193	288	290.21	434.85	404.48	Distal Intergenic	9	89909775	89915847	6073	1	19417	uc009qzr.1	-21168	ENSMUSG00000032356	Rasgrf1	RAS protein-specific guanine nucleotide-releasing factor 1	uc009qzq.1	74700	41885
chr13	57905967	57911565	5599	*	6.45	5.8	6.9	-1.09	1.92e-05	0.000195	52	59.64	116.33	121.77	Promoter (<=1kb)	13	57421195	57908332	487138	2	20745	uc007qtc.2	0	ENSMUSG00000056222	Spock1	sparc/osteonectin, cwcv and kazal-like domains proteoglycan 1	uc007qtc.2;uc057kqe.1;uc011zak.1;uc057kqf.1;uc057kqg.1;uc007qte.2	20745;20745;20745;20745;20745;20745	0;0;0;0;0;0
chr8	106493814	106578147	84334	*	10.6	10.45	10.74	-0.29	1.92e-05	0.000195	1361	1427.9	1741.05	1669.77	Promoter (<=1kb)	8	106510852	106556911	46060	1	12560	uc009ngg.2	0	ENSMUSG00000061048	Cdh3	cadherin 3	uc009ngg.2;uc009ngh.2	12560;12560	0;0
chr5	113287294	113305797	18504	*	8.03	7.69	8.31	-0.61	1.93e-05	0.000195	207	207.42	315.75	317.68	Exon (uc008yud.2/52850, exon 3 of 25)	5	113243220	113310786	67567	2	52850	uc008yud.2	4989	ENSMUSG00000042216	Sgsm1	small G protein signaling modulator 1	uc008yud.2;uc008yuf.2;uc008yug.3	52850;52850;52850	0;0;0
chr11	113614465	113621323	6859	*	6.79	6.24	7.19	-0.95	1.93e-05	0.000195	75	75.67	150.67	140.45	Promoter (<=1kb)	11	113619481	113625366	5886	1	20606	uc011yha.2	0	ENSMUSG00000047904	Sstr2	somatostatin receptor 2	uc011yha.2;uc007mep.2;uc007meo.1	20606;20606;69806	0;0;0
chr11	49892656	49904435	11780	*	7.7	7.31	8.01	-0.7	1.97e-05	0.000199	170	147.77	271.99	244.74	Promoter (<=1kb)	11	49901835	49980223	78389	1	74563	uc007irj.1	0	ENSMUSG00000020374	Rasgef1c	RasGEF domain family, member 1C	uc007irj.1;uc011xue.1;uc057kkw.1	74563;74563;74563	0;0;0
chr9	81621781	81653519	31739	*	9.17	8.94	9.37	-0.44	2e-05	0.000202	478	502.97	678.58	648.62	Promoter (<=1kb)	9	81631392	81632552	1161	2	15551	uc009qvl.1	0	ENSMUSG00000049511	Htr1b	5-hydroxytryptamine (serotonin) receptor 1B	uc009qvl.1;uc009qvm.2;uc009qvn.2;uc029xfa.1;uc009qvo.1;uc029xfb.1	15551;319405;319405;319405;319405;319405	0;0;0;0;0;0
chr9	43878223	43893339	15117	*	7.9	7.54	8.19	-0.65	2.01e-05	0.000203	193	179.82	309.1	276.69	Distal Intergenic	9	43744576	43807461	62886	1	58235	uc009pbj.1	133647	ENSMUSG00000032012	Nectin1	nectin cell adhesion molecule 1	NA	NA	NA
chr17	69962001	69979656	17656	*	8.35	8.05	8.61	-0.56	2.01e-05	0.000203	279	250.15	394.96	383.99	Promoter (<=1kb)	17	69969368	70518806	549439	1	224997	uc008dky.1	0	ENSMUSG00000003279	Dlgap1	DLG associated protein 1	uc008dky.1;uc008dkz.1;uc008dla.1;uc008dlb.3;uc008dlc.2;uc008dld.2	224997;224997;224997;224997;224997;224997	0;0;0;0;0;0
chr1	133148050	133174841	26792	*	8.74	8.47	8.96	-0.5	2.01e-05	0.000203	356	350.74	521.26	476.82	Distal Intergenic	1	133131344	133139800	8457	1	108954	uc007cps.2	16706	ENSMUSG00000046062	Ppp1r15b	protein phosphatase 1, regulatory subunit 15B	NA	NA	NA
chr1	34452463	34462623	10161	*	7.42	6.99	7.76	-0.77	2.02e-05	0.000203	133	121.07	230.44	201.94	Promoter (<=1kb)	1	34459746	34473784	14039	1	19253	uc007aos.2	0	ENSMUSG00000026126	Ptpn18	protein tyrosine phosphatase, non-receptor type 18	uc007aos.2	19253	0
chr11	90685707	90701460	15754	*	7.9	7.55	8.19	-0.64	2.02e-05	0.000203	197	177.15	294.14	289.95	Promoter (<=1kb)	11	90645691	90687601	41911	2	71943	uc007kxb.1	0	ENSMUSG00000020541	Tom1l1	target of myb1-like 1 (chicken)	uc007kxb.1;uc007kxc.1;uc011ycr.1	71943;71943;71943	0;0;0
chr11	114781031	114803620	22590	*	8.62	8.13	8.98	-0.85	2.02e-05	0.000203	254	305.34	556.16	453.31	Promoter (<=1kb)	11	114798924	114806745	7822	1	217302	uc007mfu.1	0	ENSMUSG00000034677	Gpr142	G protein-coupled receptor 142	uc007mfu.1;uc007mfv.1;uc057kms.1;uc007mfq.1;uc007mfr.1;uc007mfs.1;uc007mft.1	217302;217302;217302;286942;72014;72014;72014	0;0;0;0;0;0;0
chr16	44325760	44335073	9314	*	7.5	7.08	7.83	-0.75	2.02e-05	0.000203	130	139.76	243.18	210.98	Promoter (<=1kb)	16	44240180	44332838	92659	2	320007	uc007zhd.1	0	ENSMUSG00000022696	Sidt1	SID1 transmembrane family, member 1	uc007zhd.1;uc033gzb.1	320007;320007	0;0
chr19	38094745	38113883	19139	*	8.12	7.76	8.4	-0.64	2.03e-05	0.000204	198	235.91	360.62	314.67	Promoter (<=1kb)	19	38097079	38114263	17185	1	107221	uc008hjc.1	0	ENSMUSG00000054200	Ffar4	free fatty acid receptor 4	uc008hjc.1;uc008hjd.2;uc008hje.2	107221;19662;19662	0;10928;11438
chr4	42903548	42920582	17035	*	8.29	7.98	8.55	-0.56	2.05e-05	0.000206	259	247.48	370.59	376.75	Promoter (<=1kb)	4	42916727	42941607	24881	1	230085	uc008soi.1	0	ENSMUSG00000036062	Phf24	PHD finger protein 24	uc008soi.1;uc008soj.1;uc008sok.1	230085;230085;230085	0;0;0
chr19	5064707	5087579	22873	*	8.67	8.17	9.03	-0.86	2.06e-05	0.000207	248	328.49	546.74	500.93	Promoter (<=1kb)	19	5079337	5085477	6141	2	381199	uc008gcc.1	0	ENSMUSG00000061451	Tmem151a	transmembrane protein 151A	uc008gcc.1;uc008gcd.2;uc008gcb.2	381199;68090;70445	0;-959;0
chr5	101519439	101544282	24844	*	8.53	8.24	8.77	-0.53	2.07e-05	0.000207	305	300.89	454.79	418.35	Distal Intergenic	5	101659184	101664711	5528	2	18096	uc008yim.2	120429	ENSMUSG00000035187	Nkx6-1	NK6 homeobox 1	NA	NA	NA
chr16	5122130	5133223	11094	*	7.43	7	7.76	-0.76	2.07e-05	0.000207	119	137.09	211.05	223.04	Promoter (<=1kb)	16	5086291	5132481	46191	2	19041	uc007ybt.1	0	ENSMUSG00000039457	Ppl	periplakin	uc007ybt.1;uc007ybu.2	19041;19041	0;0
chr4	150027782	150039319	11538	*	7.69	7.27	8.01	-0.74	2.08e-05	0.000208	133	176.26	266.45	248.96	Distal Intergenic	4	149979474	150009023	29550	2	100198	uc008vxi.2	-18759	ENSMUSG00000028980	H6pd	hexose-6-phosphate dehydrogenase (glucose 1-dehydrogenase)	NA	NA	NA
chr11	121691873	121709254	17382	*	8.12	7.76	8.4	-0.64	2.08e-05	0.000208	199	235.91	361.17	314.67	Promoter (<=1kb)	11	121702427	121717389	14963	1	210029	uc007mwd.1	0	ENSMUSG00000039208	Metrnl	meteorin, glial cell differentiation regulator-like	uc007mwd.1;uc011yjn.1	210029;210029	0;0
chr4_GL456216_random	8036	33217	25182	*	8.49	8.73	8.2	0.52	2.09e-05	0.000209	432	414.84	289.16	300.8	Promoter (<=1kb)	28	15881	36213	20333	1	236082	uc009vdc.1	0	ENSMUSG00000063897	Dhrsx	dehydrogenase/reductase (SDR family) X chromosome	uc009vdc.1	236082	0
chr18	37288703	37361898	73196	*	10.43	10.27	10.57	-0.3	2.09e-05	0.000209	1267	1207.12	1543.29	1502.8	Promoter (<=1kb)	18	37294840	37297614	2775	1	93873	uc008epn.1	0	ENSMUSG00000051599	Pcdhb2	protocadherin beta 2	uc008eoy.3;uc056zgg.2;uc056zgh.2;uc008epn.1;uc008epo.1;uc008epp.1;uc008epq.1;uc008epr.1;uc008eps.1;uc008ept.1	100384868;103611158;103611159;93873;93874;93875;93876;93877;93878;93879	0;0;0;0;0;0;0;0;0;0
chr12	110975891	110982488	6598	*	6.75	6.19	7.16	-0.97	2.09e-05	0.000209	70	75.67	150.67	134.43	Promoter (<=1kb)	12	110975353	110979021	3669	2	74251	uc007pci.1	0	ENSMUSG00000037904	Ankrd9	ankyrin repeat domain 9	uc007pcg.4;uc007pch.4;uc011yuv.3;uc007pci.1;uc007pcj.1	104859;104859;104859;74251;74251	86627;86627;86627;0;0
chr17	30445031	30923747	478717	*	13.44	13.37	13.51	-0.14	2.12e-05	0.000212	10497	10719	11894.3	11437.6	Promoter (<=1kb)	17	30592861	30612659	19799	2	109801	uc012aos.2	0	ENSMUSG00000024026	Glo1	glyoxalase 1	uc012aos.2;uc012aot.2;uc008btz.1;uc008bua.1;uc008bub.1;uc008buc.1;uc008bud.1;uc008btt.2;uc008btu.2;uc012aoq.1;uc008btw.2;uc008bty.2	109801;109801;13417;13417;13417;13417;14652;224671;224671;224671;224671;67522	0;0;0;0;0;0;0;0;0;0;0;0
chr17	32098494	32107017	8524	*	7.24	6.77	7.6	-0.83	2.13e-05	0.000212	124	94.36	198.87	188.68	Distal Intergenic	17	32076083	32091423	15341	2	435518	uc008bvv.1	-7071	ENSMUSG00000002791	Pdxk-ps	pyridoxal (pyridoxine, vitamin B6) kinase, pseudogene	NA	NA	NA
chr4	136458570	136465076	6507	*	6.98	6.48	7.36	-0.88	2.14e-05	0.000213	94	84.57	165.08	162.76	Distal Intergenic	4	136469761	136543518	73758	1	269593	uc008vie.1	-4685	ENSMUSG00000001089	Luzp1	leucine zipper protein 1	uc008vie.1;uc008vif.1	269593;269593	-4685;-4685
chr1	132870029	132888173	18145	*	8.28	7.96	8.54	-0.58	2.17e-05	0.000216	234	264.39	384.44	359.88	Promoter (<=1kb)	1	132880355	132940005	59651	1	16980	uc007cpi.2	0	ENSMUSG00000026443	Lrrn2	leucine rich repeat protein 2, neuronal	uc007cpi.2	16980	0
chr11	82428339	82436096	7758	*	7.14	6.65	7.51	-0.86	2.18e-05	0.000217	88	113.06	180.03	183.86	Exon (uc007kmv.2/270893, exon 2 of 10)	11	82388900	82446361	57462	1	270893	uc007kmv.2	39439	ENSMUSG00000020701	Tmem132e	transmembrane protein 132E	uc007kmv.2;uc011yaw.2	270893;270893	0;0
chr19	45670761	45687270	16510	*	8.07	7.74	8.34	-0.6	2.19e-05	0.000217	214	213.65	336.24	314.06	Distal Intergenic	19	45578257	45660193	81937	2	30838	uc008hrf.1	-10568	ENSMUSG00000040913	Fbxw4	F-box and WD-40 domain protein 4	NA	NA	NA
chr15	89482957	89504147	21191	*	8.35	8.04	8.6	-0.56	2.2e-05	0.000219	252	275.07	394.96	380.37	Promoter (<=1kb)	15	89499857	89560261	60405	1	58234	uc007xha.3	0	ENSMUSG00000022623	Shank3	SH3 and multiple ankyrin repeat domains 3	uc007xgz.2;uc033gwd.1;uc007xha.3;uc007xhb.3;uc056yzy.1	100532730;100532730;58234;58234;58234	0;0;0;0;0
chr5	138818161	138823441	5281	*	6.75	6.15	7.17	-1.02	2.22e-05	0.00022	62	80.12	158.98	128.4	Promoter (<=1kb)	5	138820080	138821619	1540	1	384244	uc012efo.1	0	ENSMUSG00000094504	Gm5294	predicted gene 5294	uc012efo.1	384244	0
chr15	99664185	99674934	10750	*	7.54	7.1	7.87	-0.77	2.25e-05	0.000223	129	145.99	260.35	208.57	Promoter (<=1kb)	15	99670718	99701130	30413	1	11419	uc007xqa.2	0	ENSMUSG00000023017	Asic1	acid-sensing (proton-gated) ion channel 1	uc007xqa.2	11419	0
chr4	127157629	127170497	12869	*	7.74	7.37	8.04	-0.67	2.26e-05	0.000223	172	158.46	260.91	265.23	Promoter (<=1kb)	4	127169204	127237022	67819	1	242667	uc008uuo.3	0	ENSMUSG00000042388	Dlgap3	DLG associated protein 3	uc008uuo.3;uc008uup.2	242667;242667	0;0
chr12	76396736	76410367	13632	*	8.05	7.71	8.32	-0.61	2.27e-05	0.000224	213	205.64	329.04	309.24	Promoter (<=1kb)	12	76404176	76406938	2763	1	15512	uc007nyf.2	0	ENSMUSG00000059970	Hspa2	heat shock protein 2	uc007nyf.2;uc011yoa.2	15512;15512	0;0
chr5	139320523	139326632	6110	*	6.68	6.1	7.09	-0.99	2.27e-05	0.000224	64	73	140.15	132.01	Promoter (<=1kb)	5	139271876	139325464	53589	2	231821	uc009agi.1	0	ENSMUSG00000056413	Adap1	ArfGAP with dual PH domains 1	uc009agi.1	231821	0
chr15	66966502	66977119	10618	*	7.39	6.97	7.72	-0.76	2.27e-05	0.000225	120	129.97	214.38	207.97	Promoter (<=1kb)	15	66929318	66969641	40324	2	17988	uc007wax.1	0	ENSMUSG00000005125	Ndrg1	N-myc downstream regulated gene 1	uc007wax.1;uc007way.1	17988;17988	0;0
chr5	37018295	37036068	17774	*	8.16	7.84	8.42	-0.59	2.28e-05	0.000225	239	218.1	348.43	338.17	Distal Intergenic	5	37047432	37087242	39811	1	76071	uc008xfg.1	-11364	ENSMUSG00000063646	Jakmip1	janus kinase and microtubule interacting protein 1	NA	NA	NA
chr3	8658630	8687842	29213	*	8.93	8.67	9.15	-0.48	2.34e-05	0.000231	379	434.42	550.62	585.93	Promoter (<=1kb)	3	8663359	8667038	3680	2	15213	uc008oop.1	0	ENSMUSG00000040289	Hey1	hairy/enhancer-of-split related with YRPW motif 1	uc008oop.1	15213	0
chr4	91367705	91403090	35386	*	9.32	9.08	9.53	-0.45	2.39e-05	0.000236	588	497.63	765.55	712.52	Promoter (<=1kb)	4	91373284	91373363	80	2	102466157	uc033idf.1	0	ENSMUSG00000098563	Mir6402	microRNA 6402	uc033idf.1;uc008ton.3;uc008too.3;uc008top.4;uc008toq.3;uc008tor.2	102466157;15569;15569;15569;15569;15569	0;0;0;0;0;0
chr5	112149972	112168225	18254	*	7.94	7.58	8.23	-0.65	2.44e-05	0.00024	180	202.97	315.19	283.92	Distal Intergenic	5	112206763	112210002	3240	1	75569	uc008ysj.2	-38538	ENSMUSG00000101683	1700028D13Rik	RIKEN cDNA 1700028D13 gene	NA	NA	NA
chr1	14743872	14758459	14588	*	7.97	7.62	8.26	-0.63	2.45e-05	0.000241	205	188.72	323.5	287.54	Promoter (<=1kb)	1	14753346	14755966	2621	2	17681	uc007aja.2	0	ENSMUSG00000025930	Msc	musculin	uc007aja.2	17681	0
chr1	184879795	184887960	8166	*	7.23	6.77	7.58	-0.81	2.5e-05	0.000246	100	118.4	197.2	185.66	Promoter (<=1kb)	1	184871926	184883036	11111	2	226777	uc007dys.1	0	ENSMUSG00000039349	C130074G19Rik	RIKEN cDNA C130074G19 gene	uc007dys.1	226777	0
chr12	82609731	82622239	12509	*	8	7.65	8.27	-0.62	2.52e-05	0.000248	213	189.61	319.07	300.2	Promoter (<=1kb)	12	82616925	83162056	545132	1	50779	uc007oda.3	0	ENSMUSG00000021219	Rgs6	regulator of G-protein signaling 6	uc007oda.3;uc057bby.1;uc007odb.3	50779;50779;50779	0;0;0
chr16	84767377	84779500	12124	*	7.8	7.4	8.11	-0.71	2.54e-05	0.000249	178	159.35	307.44	244.14	Promoter (<=1kb)	16	84774123	84810996	36874	1	67374	uc007ztf.1	0	ENSMUSG00000053062	Jam2	junction adhesion molecule 2	uc007ztf.1;uc007ztg.3	67374;67374	0;0
chr9	32668045	32699166	31122	*	8.94	8.68	9.16	-0.48	2.56e-05	0.000251	395	427.3	602.69	541.32	Promoter (<=1kb)	9	32696042	32757820	61779	1	23871	uc009osb.1	0	ENSMUSG00000032035	Ets1	E26 avian leukemia oncogene 1, 5' domain	uc009osa.1;uc009osb.1;uc009osc.1	23871;23871;23871	0;0;0
chr6	54319282	54331947	12666	*	7.76	7.37	8.07	-0.71	2.56e-05	0.000251	144	186.05	260.91	277.29	Promoter (<=1kb)	6	54327012	54330200	3189	1	78004	uc009bzu.1	0	ENSMUSG00000045725	Prr15	proline rich 15	uc012eme.1;uc009bzu.1	100042056;78004	0;0
chr7	120828426	120845758	17333	*	7.91	7.54	8.2	-0.66	2.6e-05	0.000255	186	185.16	321.84	266.44	Promoter (<=1kb)	7	120842831	120907219	64389	1	13631	uc009jnb.3	0	ENSMUSG00000035064	Eef2k	eukaryotic elongation factor-2 kinase	uc009jnb.3;uc009jnc.2	13631;13631	0;0
chr10	61976418	61988633	12216	*	7.5	7.07	7.84	-0.77	2.63e-05	0.000257	146	122.85	252.04	205.56	Promoter (<=1kb)	10	61838234	61979108	140875	2	12817	uc007fgn.2	0	ENSMUSG00000058806	Col13a1	collagen, type XIII, alpha 1	uc007fgn.2;uc007fgo.2;uc007fgp.1	12817;12817;12817	0;0;0
chr9	71208031	71239634	31604	*	9.19	8.95	9.4	-0.45	2.64e-05	0.000258	515	477.15	714.59	637.17	Promoter (<=1kb)	9	71211913	71215241	3329	2	100041660	uc033jlh.1	0	NA	Gm3458	predicted gene 3458	uc033jlh.1;uc033jli.1;uc033jlg.1;uc009qox.2	100041660;100041660;102635087;19378	0;0;0;0
chr13	38329225	38349871	20647	*	8.41	8.1	8.67	-0.57	2.64e-05	0.000258	305	243.03	423.77	392.43	Promoter (<=1kb)	13	38345716	38500314	154599	1	12161	uc007qdp.2	0	ENSMUSG00000039004	Bmp6	bone morphogenetic protein 6	uc007qdp.2	12161	0
chr9	99434372	99441843	7472	*	6.65	6.06	7.07	-1.01	2.65e-05	0.000258	77	56.08	135.16	133.22	Promoter (<=1kb)	9	99385420	99436712	51293	2	17532	uc009rec.1	0	ENSMUSG00000032470	Mras	muscle and microspikes RAS	uc009rec.1;uc009red.1	17532;17532	0;0
chr8	110709673	110878590	168918	*	11.61	11.49	11.72	-0.23	2.68e-05	0.000261	2782	2976.86	3489.3	3251.54	Promoter (<=1kb)	8	110838535	110838598	64	2	100217465	uc012gkp.1	0	NA	Snord111	small nucleolar RNA, C/D box 111	uc012gkp.1;uc009nlb.1;uc009nlc.1;uc009nld.1;uc009nle.1;uc009nlf.1;uc009nku.1;uc009nkv.2;uc012gkn.2;uc009nkw.2;uc009nlg.2;uc009nlh.3;uc009nkx.2;uc009nky.2;uc012gko.1;uc009nkz.3;uc009nla.3	100217465;101943;101943;101943;102339;102339;234729;234729;234729;234729;234730;234730;244654;244654;76527;76527;76527	0;0;0;0;0;0;0;0;0;0;0;0;0;0;0;0;0
chr10	69393571	69405719	12149	*	7.68	7.29	7.99	-0.7	2.7e-05	0.000263	158	154.01	273.65	233.29	Exon (uc007fms.1/uc007fms.1, exon 1 of 3)	10	69336635	69352912	16278	2	12534	uc007fmr.1	-40659	ENSMUSG00000019942	Cdk1	cyclin-dependent kinase 1	NA	NA	NA
chr14	69187443	69206440	18998	*	8.26	7.94	8.52	-0.57	2.71e-05	0.000264	260	231.45	381.67	350.23	Promoter (<=1kb)	14	69190692	69194658	3967	1	18095	uc007umd.1	0	ENSMUSG00000022061	Nkx3-1	NK3 homeobox 1	uc007umd.1	18095	0
chr19	45540117	45547474	7358	*	7.01	6.48	7.4	-0.91	2.74e-05	0.000267	91	88.13	191.66	145.28	Exon (uc008hrb.1/uc008hrb.1, exon 1 of 2)	19	45552275	45560543	8269	2	56626	uc008hrc.2	13069	ENSMUSG00000025218	Poll	polymerase (DNA directed), lambda	uc008hrc.2	56626	13069
chr2	6096543	6102395	5853	*	6.81	6.28	7.2	-0.93	2.74e-05	0.000267	76	79.23	141.26	153.72	3' UTR	2	6098500	6130185	31686	2	227545	uc008ige.2	27790	ENSMUSG00000045319	Proser2	proline and serine rich 2	uc008ige.2;uc008igf.2	227545;227545	0;0
chr8	30042380	30093759	51380	*	10.03	10.18	9.85	0.33	2.76e-05	0.000268	1156	1166.17	910.13	939.78	Distal Intergenic	8	30568395	30575573	7179	1	71314	uc029wsd.1	-474636	ENSMUSG00000097044	4933433F19Rik	RIKEN cDNA 4933433F19 gene	NA	NA	NA
chr17	47408011	47420018	12008	*	7.49	7.08	7.8	-0.72	2.78e-05	0.00027	137	134.42	227.67	219.42	Promoter (<=1kb)	17	47412734	47414711	1978	2	75462	uc008cvd.2	0	ENSMUSG00000047150	1700001C19Rik	RIKEN cDNA 1700001C19 gene	uc008cvd.2;uc057kyb.1;uc008cve.2	75462;75462;75462	0;0;0
chr8	11306979	11317448	10470	*	7.23	6.79	7.58	-0.79	2.79e-05	0.000271	112	108.61	198.31	183.25	Promoter (<=1kb)	8	11198423	11312826	114404	2	12826	uc009kvb.2	0	ENSMUSG00000031502	Col4a1	collagen, type IV, alpha 1	uc009kvb.2;uc012fzi.1;uc009kvc.3	12826;12826;12827	0;0;0
chr2	157907994	157919435	11442	*	7.43	7.01	7.76	-0.75	2.85e-05	0.000277	137	120.18	205.51	226.66	Promoter (<=1kb)	2	157914653	157944719	30067	1	277432	uc012cic.1	0	ENSMUSG00000037843	Vstm2l	V-set and transmembrane domain containing 2-like	uc012cic.1	277432	0
chr17	35255539	35278237	22699	*	8.53	8.24	8.77	-0.53	2.92e-05	0.000283	289	316.91	454.79	417.75	Promoter (<=1kb)	17	35263094	35266059	2966	1	14964	uc008chf.1	0	ENSMUSG00000073411	H2-D1	histocompatibility 2, D region locus 1	uc033hdj.1;uc008chf.1;uc008chg.1;uc008chh.1;uc029thj.1;uc008cha.2;uc008chb.2;uc008chc.2;uc008chd.2;uc008che.1	102465886;14964;14964;14964;14980;53817;53817;53817;53817;53817	4250;0;0;0;0;13793;0;13669;12722;4292
chr10	123251566	123271211	19646	*	8.42	8.13	8.66	-0.53	2.93e-05	0.000284	291	267.95	407.15	400.87	Promoter (<=1kb)	10	123264076	123741204	477129	1	268354	uc007hgu.2	0	ENSMUSG00000044071	Fam19a2	family with sequence similarity 19, member A2	uc007hgu.2;uc007hgv.2;uc007hgw.2	268354;268354;268354	0;0;0
chr18	75688869	75707738	18870	*	7.99	7.64	8.28	-0.64	2.94e-05	0.000284	204	194.07	340.68	281.51	Promoter (<=1kb)	18	75431205	75697696	266492	2	269037	uc008fqg.3	0	ENSMUSG00000052928	Ctif	CBP80/20-dependent translation initiation factor	uc008fqg.3	269037	0
chr14	51909363	51916353	6991	*	6.98	6.46	7.36	-0.9	2.94e-05	0.000284	82	94.36	179.48	148.89	Promoter (<=1kb)	14	51905271	51913488	8218	2	29811	uc007tnk.2	0	ENSMUSG00000004558	Ndrg2	N-myc downstream regulated gene 2	uc007tnm.1;uc011zkg.1;uc007tnk.2;uc007tnl.2	219038;219038;29811;29811	-2072;-2362;0;0
chr17	47833586	47836287	2702	*	6.07	5.32	6.57	-1.24	2.94e-05	0.000284	40	40.06	100.26	89.22	Promoter (<=1kb)	17	47815328	47834691	19364	2	17240	uc008cwi.3	0	ENSMUSG00000032717	Mdfi	MyoD family inhibitor	uc008cwh.3;uc008cwk.2;uc033hek.1;uc008cwi.3;uc008cwj.3	17240;17240;17240;17240;17240	-295;-295;-295;0;-295
chr9	110281120	110286220	5101	*	7.49	7.07	7.82	-0.75	2.94e-05	0.000284	151	117.51	237.09	215.2	Promoter (<=1kb)	9	110281287	110281409	123	1	102465959	uc033jng.1	0	ENSMUSG00000098973	Mir6236	microRNA 6236	uc033jng.1	102465959	0
chr1	180326309	180343088	16780	*	8.15	7.82	8.42	-0.6	2.99e-05	0.000288	246	207.42	353.97	331.54	Promoter (<=1kb)	1	180326969	180330549	3581	2	277333	uc007dwf.1	0	NA	Gm5069	glyceraldehyde-3-phosphate dehydrogenase pseudogene	uc007dwf.1;uc007dwg.1	277333;320404	0;0
chr10	115578073	115592601	14529	*	8.01	7.67	8.29	-0.62	3.01e-05	0.000291	210	197.63	329.04	295.38	Promoter (<=1kb)	10	115450314	115587780	137467	2	14160	uc007hbi.1	0	ENSMUSG00000020140	Lgr5	leucine rich repeat containing G protein coupled receptor 5	uc007hbi.1;uc007hbj.1;uc007hbk.1;uc007hbl.2	14160;14160;14160;77798	0;0;0;0
chr12	70100168	70121909	21742	*	8.42	8.11	8.67	-0.56	3.05e-05	0.000294	263	290.21	433.74	379.77	Promoter (<=1kb)	12	70011435	70102854	91420	2	18080	uc007ntf.1	0	ENSMUSG00000021068	Nin	ninein	uc007ntf.1;uc007ntg.2;uc007nth.2;uc007nti.2;uc011yng.2;uc011ynh.2;uc007ntj.2;uc007ntk.1	18080;18080;18080;18080;18080;18080;18080;18080	0;0;0;0;0;0;0;0
chr13	56436981	56443952	6972	*	7.14	6.67	7.5	-0.83	3.09e-05	0.000297	93	110.39	171.72	190.49	Promoter (<=1kb)	13	56438355	56472363	34009	1	328258	uc007qsn.2	0	ENSMUSG00000021509	Slc25a48	solute carrier family 25, member 48	uc007qsn.2	328258	0
chr17	25948823	25954117	5295	*	6.94	6.44	7.32	-0.87	3.12e-05	0.0003	93	81.01	158.43	160.35	Promoter (<=1kb)	17	25946392	25952565	6174	2	100034748	uc008bcv.1	0	ENSMUSG00000025727	A930017K11Rik	RIKEN cDNA A930017K11 gene	uc008bcv.1;uc008bcy.1;uc008bcu.1	100034748;50817;621239	0;31589;-3892
chr5	123496760	123510203	13444	*	7.57	7.15	7.89	-0.74	3.13e-05	0.000301	145	139.76	262.02	212.19	3' UTR	5	123489325	123508205	18881	1	381741	uc008znu.2	7435	ENSMUSG00000063409	Lrrc43	leucine rich repeat containing 43	uc008znw.1;uc008znu.2;uc008znv.2;uc012edf.2;uc012edg.1;uc008znx.1	231727;381741;381741;381741;66593;66593	-257;0;0;0;0;13961
chr1	162469370	162486274	16905	*	8.34	8.04	8.58	-0.54	3.19e-05	0.000306	270	258.16	389.98	377.96	Promoter (<=1kb)	1	161987302	162478034	490733	2	103967	uc007dga.2	0	ENSMUSG00000040265	Dnm3	dynamin 3	uc007dga.2;uc007dgb.2;uc007dgg.2	103967;103967;103967	0;0;0
chr4	156202136	156212719	10584	*	7.53	7.11	7.86	-0.75	3.2e-05	0.000307	121	154.9	244.29	219.42	Promoter (<=1kb)	4	156203284	156206028	2745	1	100382	uc008wgl.2	0	NA	AW011738	expressed sequence AW011738	uc012dri.1;uc008wgl.2;uc008wgf.2;uc008wgi.1;uc008wgm.1	100038882;100382;11603;11603;74183	-1318;0;-4648;-4648;-3208
chr17	32412104	32420542	8439	*	7.02	6.53	7.38	-0.85	3.21e-05	0.000308	89	96.14	170.61	162.76	Promoter (<=1kb)	17	32412459	32420975	8517	2	57757	uc008bwz.4	433	ENSMUSG00000079563	Pglyrp2	peptidoglycan recognition protein 2	uc008bwz.4;uc008bxa.4;uc012aoz.3;uc012apa.3;uc008bxb.4;uc008bxc.4;uc008bxd.1	57757;57757;57757;57757;57757;57757;57757	0;0;0;0;0;0;0
chr15	30169693	30178894	9202	*	7.61	7.2	7.93	-0.73	3.24e-05	0.00031	169	125.52	248.72	239.31	Promoter (<=1kb)	15	30172593	31029344	856752	1	18163	uc007vjz.2	0	ENSMUSG00000022240	Ctnnd2	catenin (cadherin associated protein), delta 2	uc007vjz.2;uc011zrs.2	18163;18163	0;0
chr5	92388859	92395046	6188	*	7.24	6.79	7.59	-0.8	3.33e-05	0.000319	107	113.95	209.39	176.02	3' UTR	5	92331827	92393177	61351	1	109979	uc008ycw.2	57032	ENSMUSG00000034842	Art3	ADP-ribosyltransferase 3	uc008ycw.2;uc008ycx.2;uc057bup.2;uc008ydc.1;uc008ydd.3;uc008yde.1;uc012dyq.1;uc008ydg.3;uc057buq.2	109979;109979;109979;109979;109979;109979;109979;109979;109979	0;0;0;0;0;0;0;0;0
chr4	122996654	123005956	9303	*	7.06	6.58	7.42	-0.84	3.34e-05	0.00032	95	96.14	181.14	160.95	Promoter (<=1kb)	4	122995931	123002485	6555	1	16918	uc008uop.3	723	ENSMUSG00000028654	Mycl	v-myc avian myelocytomatosis viral oncogene lung carcinoma derived	uc008uop.3;uc008uoq.3	16918;16918	0;0
chr7	143104435	143108944	4510	*	6.49	5.85	6.93	-1.08	3.37e-05	0.000322	69	46.29	123.53	119.96	Promoter (<=1kb)	7	143107254	143427042	319789	1	16535	uc009kpb.1	0	ENSMUSG00000009545	Kcnq1	potassium voltage-gated channel, subfamily Q, member 1	uc009kpb.1;uc012fxu.1;uc012fxv.1;uc012fxw.1	16535;16535;16535;16535	0;0;0;0
chr7	44576698	44593428	16731	*	7.96	7.6	8.25	-0.66	3.38e-05	0.000323	181	206.53	334.03	276.69	Promoter (<=1kb)	7	44590886	44604751	13866	1	16504	uc009gqg.1	0	ENSMUSG00000062785	Kcnc3	potassium voltage gated channel, Shaw-related subfamily, member 3	uc009gqg.1;uc009gqh.1;uc057agz.1;uc009gqe.1;uc009gqf.1	16504;16504;16504;16541;16541	0;0;0;0;0
chr11	72960096	72962999	2904	*	5.97	5.16	6.49	-1.33	3.42e-05	0.000326	44	27.6	88.08	91.63	Promoter (<=1kb)	11	72961169	72993043	31875	1	53313	uc007jzo.2	0	ENSMUSG00000020788	Atp2a3	ATPase, Ca++ transporting, ubiquitous	uc007jzo.2;uc007jzp.2;uc011xym.1	53313;53313;53313	0;0;0
chr7	9978643	10042442	63800	*	9.92	10.08	9.74	0.34	3.43e-05	0.000328	1051	1110.09	841.44	867.44	Promoter (<=1kb)	7	9976245	9992139	15895	2	625605	uc012eyn.1	0	ENSMUSG00000096180	Vmn2r49	vomeronasal 2, receptor 49	uc012eyo.1;uc012eyn.1	434117;625605	0;0
chr11	80297127	80306191	9065	*	7.17	6.72	7.52	-0.8	3.44e-05	0.000328	101	109.5	182.8	183.25	Promoter (<=1kb)	11	80300912	80355986	55075	1	246104	uc007klt.2	0	ENSMUSG00000017692	Rhbdl3	rhomboid like 3	uc007klt.2	246104	0
chr9	20744159	20746063	1905	*	5.47	4.44	6.07	-1.63	3.47e-05	0.000331	22	21.37	74.23	59.68	Distal Intergenic	9	20667986	20728214	60229	2	244723	uc009oje.1	-15945	ENSMUSG00000032172	Olfm2	olfactomedin 2	NA	NA	NA
chr13	76378894	76387309	8416	*	7.18	6.73	7.52	-0.79	3.55e-05	0.000338	105	106.83	181.69	185.06	Promoter (<=1kb)	13	76384961	77031810	646850	1	78771	uc007rgn.1	0	ENSMUSG00000021596	Mctp1	multiple C2 domains, transmembrane 1	uc007rgn.1	78771	0
chr4	45823531	45831846	8316	*	7.39	6.97	7.71	-0.74	3.56e-05	0.000339	125	125.52	217.7	200.73	Promoter (<=1kb)	4	45809507	45826827	17321	2	75426	uc008ssy.1	0	ENSMUSG00000035551	Igfbpl1	insulin-like growth factor binding protein-like 1	uc008ssy.1	75426	0
chr15	55894619	55910097	15479	*	8.04	7.71	8.3	-0.59	3.57e-05	0.000339	209	210.09	318.52	312.86	Promoter (<=1kb)	15	55639154	55906949	267796	2	20649	uc007vsk.1	0	ENSMUSG00000060429	Sntb1	syntrophin, basic 1	uc007vsk.1	20649	0
chr2	91921428	91924145	2718	*	5.87	5.04	6.4	-1.36	3.58e-05	0.00034	32	33.83	92.51	75.95	Promoter (<=1kb)	2	91922189	91929829	7641	1	12672	uc008kwv.2	0	ENSMUSG00000040495	Chrm4	cholinergic receptor, muscarinic 4	uc008kwv.2;uc008kwt.1;uc008kwu.1	12672;228361;228361	0;191290;191290
chr13	12098995	12108676	9682	*	7.28	6.81	7.63	-0.82	3.6e-05	0.000342	105	119.29	221.58	174.21	Promoter (<=1kb)	13	11553103	12106945	553843	2	20191	uc007pld.1	0	ENSMUSG00000021313	Ryr2	ryanodine receptor 2, cardiac	uc007pld.1;uc011ywc.1;uc007plf.2	20191;20191;20191	0;0;0
chr11	119019171	119022616	3446	*	6.13	5.41	6.62	-1.21	3.69e-05	0.00035	44	40.95	106.91	89.22	Promoter (<=1kb)	11	119023021	119031275	8255	1	12416	uc007mpt.2	-405	ENSMUSG00000025577	Cbx2	chromobox 2	uc007mpt.2	12416	-405
[truncated: 11,572 more rows]

## Sheet: D6_H33K27me3
seqnames	start	end	width	strand	Conc	Conc_H33_K27me3	Conc_H31_K27me3	Fold	p.value	FDR	S09	S10	S13	S14	annotation	geneChr	geneStart	geneEnd	geneLength	geneStrand	geneId	transcriptId	distanceToTSS	ENSEMBL	SYMBOL	GENENAME	flank_txIds	flank_geneIds	flank_gene_distances
[truncated: 7,460 more rows]

[truncated: 1 more sheets: D6_H3K27me3]
