# Supplementary material for: Multi-omic profiling of histone variant H3.3 lysine 27 methylation reveals a distinct role from canonical H3 in stem cell differentiation
Source: Royal Society of Chemistry journal article supplement (doi:10.1039/d1mo00352f), 2022-01-12
Supplement: d1mo00352f8.xlsx [file d1mo00352f8.xlsx]

## Sheet: Sheet1
Peptide	WT_Day0_B1	WT_Day0_B2	WT_Day0_B3	WT_Day3_B1	WT_Day3_B2	WT_Day3_B3	WT_Day6_B1	WT_Day6_B2	WT_Day6_B3	H33AKO_Day0_B1	H33AKO_Day0_B2	H33AKO_Day0_B3	H33AKO_Day3_B1	H33AKO_Day3_B2	H33AKO_Day3_B3	H33AKO_Day6_B1	H33AKO_Day6_B2	H33AKO_Day6_B3	H33K27A_Day0_B1	H33K27A_Day0_B2	H33K27A_Day0_B3	H33K27A_Day3_B1	H33K27A_Day3_B2	H33K27A_Day3_B3	H33K27A_Day6_B1	H33K27A_Day6_B2	H33K27A_Day6_B3
TKQTAR(H3_3_8)
H3_3_8 unmod	0.974411	0.986298	0.97095	0.973816	0.966474	0.974802	0.964628	0.967114	0.974064	0.975772	0.968213	0.972496	0.973992	0.97079	0.965949	0.978054	0.971755	0.956311	0.937748	0.956621	0.966102	0.973715	0.960354	0.97237	0.962704	0.953205	0.958813
H3K4me1	0.0247498	0.0129223	0.0241692	0.0225258	0.0322661	0.0239752	0.0337337	0.0251721	0.0251067	0.0217327	0.0265696	0.0227022	0.0231871	0.0239314	0.0285856	0.019998	0.0256348	0.0424866	0.0617473	0.0426754	0.0327578	0.0255906	0.0283196	0.0221489	0.029214	0.0431503	0.0341544
H3K4me2	8.20644e-06	0.000109382	0.00103096	0.000425991	7.89239e-05	0.00011116	0.000326458	0.00303059	0.000113745	0.000181729	0.000428285	0.000504694	0.000263905	0.00135672	0.00135711	0.000320768	0.00027623	0.000211713	9.51124e-06	2.44643e-05	4.56078e-05	8.8595e-05	0.005052	0.00122867	0.00405746	0.000832918	0.00286447
H3K4me3	0.000830818	0.000670688	0.00384971	0.0032324	0.00118071	0.0011118	0.001312	0.00468337	0.000715157	0.00231332	0.00478935	0.00429745	0.00255724	0.00392183	0.00410863	0.00162704	0.00233401	0.000991104	0.000495189	0.000678926	0.00109491	0.000605796	0.00627435	0.00425245	0.00402428	0.00281201	0.00416766
H3K4ac	0	0	0	0	0	0	0	0	0	0	0	0	0	0	0	0	0	0	0	0	0	0	0	0	0	0	0
KSTGGKAPR(H3_9_17)
H3_9_17 unmod	0.147336	0.182205	0.10902	0.117923	0.109254	0.105096	0.0968096	0.0868491	0.0942781	0.1327	0.155539	0.133435	0.122033	0.110389	0.120765	0.0773652	0.0821937	0.0987011	0.206532	0.193065	0.154734	0.117921	0.112567	0.104193	0.104572	0.109241	0.100944
H3K9me1	0.133114	0.175908	0.122039	0.119106	0.112471	0.0638319	0.0982656	0.14384	0.12601	0.122129	0.0852505	0.11499	0.144289	0.120026	0.119343	0.12192	0.105814	0.0935282	0.0923135	0.123968	0.123066	0.119992	0.113905	0.0646403	0.0833088	0.0733105	0.13592
H3K9me2	0.213071	0.184349	0.209343	0.179358	0.201107	0.204631	0.227048	0.196166	0.222372	0.199028	0.173121	0.213486	0.174073	0.169873	0.177406	0.201776	0.203696	0.236736	0.192677	0.200129	0.201445	0.185768	0.192454	0.202873	0.19631	0.24538	0.216875
H3K9me3	0.208032	0.165156	0.203062	0.187206	0.20856	0.215576	0.240469	0.197716	0.224049	0.198745	0.202502	0.206695	0.182455	0.186229	0.18824	0.206412	0.203181	0.233846	0.185845	0.182318	0.179078	0.18615	0.204419	0.202738	0.219972	0.269922	0.254055
H3K9ac	0.00536332	0.00463502	0.00591792	0.0100984	0.0122603	0.0103814	0.007113	0.00717689	0.00613598	0.00400797	0.00561069	0.00274591	0.0103586	0.0104792	0.00925225	0.00680128	0.00651325	0.00618517	0.00697517	0.00646043	0.00631108	0.00949062	0.0109597	0.0138469	0.0103531	0.0105775	0.00593689
H3K14ac	0.0752252	0.0516757	0.0614326	0.0799121	0.0865471	0.0819833	0.0533549	0.0566535	0.0547627	0.0704128	0.0766007	0.0688868	0.0786993	0.0796169	0.0755774	0.0640785	0.0631154	0.0650381	0.102352	0.102228	0.085228	0.0817442	0.0708495	0.0738847	0.066485	0.0676488	0.0549733
H3K9me1K14ac	0.0617641	0.095649	0.0663868	0.081594	0.0636045	0.074739	0.0497099	0.0705175	0.0607938	0.0741208	0.0942803	0.0822535	0.0753032	0.0840238	0.0868122	0.0671795	0.0602482	0.052678	0.0847578	0.0523702	0.0550781	0.079652	0.0843309	0.102212	0.102906	0.103552	0.0625924
H3K9me2K14ac	0.110514	0.0965723	0.149625	0.155691	0.137447	0.161814	0.157268	0.16434	0.147942	0.134862	0.14299	0.120035	0.144003	0.161785	0.148888	0.174999	0.186397	0.150718	0.0885815	0.100192	0.135988	0.153612	0.141557	0.152454	0.149748	0.0794889	0.115042
H3K9me3K14ac	0.045427	0.0437869	0.0726685	0.0682019	0.0683013	0.0815281	0.0691424	0.0759476	0.0631726	0.0636728	0.0635588	0.057071	0.0681292	0.0768575	0.0730132	0.078737	0.088088	0.0617529	0.0397055	0.0390292	0.058822	0.0652369	0.0682411	0.0825072	0.065321	0.0400623	0.0529693
H3K9acK14ac	0.000152932	6.28225e-05	0.000504773	0.000909458	0.000447062	0.00041842	0.000820332	0.000793114	0.000484425	0.000322088	0.000547637	0.000401035	0.000656862	0.000721269	0.000703649	0.000732346	0.000752064	0.000816714	0.000260287	0.00024114	0.000250968	0.000433434	0.00071683	0.000651192	0.0010234	0.000817664	0.000692518
KQLATKAAR(H3_18_26)
H3_18_26 unmod	0.623435	0.644276	0.618834	0.567887	0.531068	0.518117	0.62738	0.565244	0.5908	0.592074	0.617117	0.612687	0.559745	0.556241	0.545281	0.622264	0.629936	0.613156	0.619605	0.583068	0.627871	0.551209	0.562487	0.541431	0.645218	0.621713	0.64984
H3K23me1	0.00198751	0.00144651	0.0024043	0.00195254	0.00250322	0.00245741	0.00168397	0.00202062	0.00126298	0.00219065	0.00181341	0.00159463	0.00222063	0.00236334	0.00235914	0.00133197	0.00148219	0.00151917	0.00253117	0.00276743	0.00281841	0.00292584	0.00289137	0.00323537	0.0022414	0.00172857	0.00161429
H3K18me1	0.0013123	0.00118757	0.000769441	0.000711371	0.00110072	0.00101896	0.00156156	0.00167002	0.00161532	0.000884071	0.000910425	0.00107806	0.00090018	0.0010928	0.000987318	0.00166099	0.00166236	0.00136718	0.00164014	0.00129074	0.00109319	0.00100204	0.00123975	0.000918788	0.001565	0.00184336	0.00146036
H3K18me1K23me1	0.000121518	5.83903e-05	5.75043e-05	0.000976402	0.000983195	0.000969137	0.000199175	0.00034617	0.000263127	0.000112677	0.000165894	0.000117359	0.000730817	0.00079729	0.000304932	0.000404525	0.000819603	0.000371132	0.000186424	0.000150943	0.000117651	0.00064515	0.000824926	0.000956046	0.000407781	0.000188195	0.000190891
H3K18ac	0.069213	0.0628736	0.0685898	0.0890167	0.0976319	0.0945105	0.0564679	0.0587751	0.0595201	0.0700259	0.0660286	0.0733809	0.0901516	0.0969385	0.091992	0.0615976	0.0566055	0.0532232	0.0738779	0.0773657	0.0696504	0.0843929	0.092631	0.0899341	0.0551391	0.0494784	0.0478681
H3K23ac	0.245885	0.238972	0.236901	0.24923	0.260651	0.27722	0.245513	0.273036	0.261563	0.2713	0.254093	0.254833	0.246833	0.257115	0.258798	0.254923	0.243016	0.253762	0.249441	0.272492	0.246464	0.263799	0.240223	0.272438	0.224879	0.251349	0.229569
H3K18acK23ac	0.058046	0.0511862	0.0724438	0.0902258	0.106062	0.105707	0.0671944	0.0989077	0.0849756	0.0634121	0.059872	0.0563094	0.0994179	0.0854529	0.100277	0.0578175	0.066479	0.0766014	0.0527189	0.0628655	0.0519855	0.0960263	0.0997027	0.0910872	0.0705492	0.0736997	0.0694574
KSAPATGGVKKPHR(H3_27_40)
H3_27_40 unmod	0.0964083	0.11562	0.0851272	0.133259	0.138331	0.142826	0.137401	0.122485	0.151024	0.0930221	0.0859473	0.0987906	0.146735	0.129167	0.119501	0.131787	0.101908	0.150562	0.105139	0.111992	0.110897	0.174474	0.183775	0.151292	0.181407	0.204578	0.216036
H3K36me1	0.0295111	0.032784	0.0260101	0.0302275	0.0296442	0.0307517	0.0266616	0.0252475	0.0240627	0.0257184	0.0280946	0.028392	0.0301422	0.0276595	0.0260443	0.0322894	0.0206449	0.0240243	0.0266494	0.0231235	0.0224813	0.0344663	0.0358719	0.030892	0.0417357	0.043816	0.046623
H3K27me1	0.0467452	0.052525	0.0393991	0.0441682	0.0436954	0.0437483	0.045783	0.0459255	0.0484324	0.0382803	0.038604	0.0416614	0.0467952	0.048229	0.0441293	0.0416664	0.0411009	0.046933	0.0476454	0.0492798	0.0501183	0.0575137	0.054425	0.0552181	0.051271	0.0572859	0.0627919
H3K27me2	0.163719	0.106825	0.136071	0.120092	0.122639	0.118303	0.146951	0.122638	0.146561	0.143504	0.143373	0.144335	0.127179	0.137345	0.131694	0.141825	0.15761	0.184548	0.165085	0.195262	0.180717	0.118326	0.121357	0.122787	0.0983391	0.125048	0.127776
H3K36me2	0.0545111	0.0677135	0.0403406	0.0463453	0.048216	0.0463022	0.0301965	0.0301698	0.0293571	0.0394691	0.0381048	0.0442213	0.0495732	0.0491173	0.0471606	0.0440344	0.0316494	0.030011	0.037617	0.0370779	0.0380258	0.0518704	0.0608533	0.0508904	0.0493359	0.0377192	0.045996
H3K27me3	0.0837449	0.0594777	0.0694797	0.0601832	0.0603209	0.0605725	0.0750059	0.0625897	0.0747182	0.0733217	0.0766056	0.0770782	0.0597189	0.0668199	0.0650023	0.0754682	0.0853662	0.0970001	0.0822555	0.102066	0.0941606	0.0608738	0.05719	0.0612569	0.0474841	0.0581041	0.0603094
H3K36me3	0	0	0	0	0	0	0	0	0	0	0	0	0	0	0	0	0	0	0	0	0	0	0	0	0	0	0
H3K27me2K36me1	0.119317	0.159449	0.121016	0.106114	0.0980164	0.0954056	0.0883721	0.0912959	0.0954652	0.105115	0.113165	0.121531	0.106564	0.109857	0.115386	0.0920135	0.10945	0.0929286	0.105142	0.110641	0.115916	0.0932128	0.0917645	0.102146	0.0823393	0.0812303	0.0732314
H3K27me1K36me2	0.0993818	0.139963	0.0917949	0.114535	0.0987534	0.112504	0.0759497	0.0966932	0.095614	0.0998634	0.10258	0.108645	0.103745	0.113054	0.114369	0.10385	0.0793234	0.0770912	0.0776512	0.0616622	0.0665163	0.106338	0.118642	0.118064	0.104793	0.0927672	0.0949764
H3K27me1K36me1	0.0604834	0.0663173	0.0606815	0.0630565	0.0607631	0.0597255	0.0661704	0.0691275	0.0609232	0.0596928	0.0630758	0.0629616	0.0601067	0.0601683	0.0652507	0.0619503	0.0524029	0.061536	0.0573164	0.0553276	0.0554589	0.0767196	0.0757668	0.0713996	0.0870927	0.0935731	0.0948704
H3K27me3K36me1	0.0375345	0.0502458	0.0365908	0.0260929	0.0261562	0.0236913	0.0380078	0.0306654	0.0374943	0.0322852	0.0373562	0.0368605	0.0282327	0.0334801	0.0303135	0.0316994	0.0447651	0.0376982	0.0455394	0.0412974	0.0410415	0.0194226	0.0174838	0.0207502	0.0144812	0.0169439	0.0129355
H3K27me1K36me3	0.0179666	0.0304585	0.018741	0.0202811	0.0187948	0.0213927	0.0171793	0.0204585	0.0209499	0.0197114	0.0207408	0.0207986	0.0199181	0.0238515	0.0228118	0.0209319	0.0180014	0.0172538	0.0226991	0.0166354	0.0179672	0.0203858	0.0225793	0.0214697	0.0221909	0.0215523	0.0182216
H3K27me2K36me2	0.135312	0.0793635	0.196348	0.173066	0.191374	0.173079	0.198763	0.216076	0.159611	0.197778	0.175383	0.150111	0.156417	0.13747	0.156809	0.163379	0.19314	0.131111	0.153786	0.136456	0.142201	0.124425	0.108131	0.13009	0.167859	0.122908	0.101453
H3K27me2K36me3	0	0	0	0	0	0	0	0	0	0	0	0	0	0	0	0	0	0	0	0	0	0	0	0	0	0	0
H3K27me3K36me2	0.0469358	0.0282891	0.0677492	0.0506859	0.0518746	0.0592276	0.0492966	0.060537	0.050963	0.0641243	0.0686098	0.0566004	0.0527086	0.0534174	0.0508415	0.0546465	0.0605108	0.0444444	0.0631132	0.0498567	0.0545926	0.0452654	0.0371404	0.0491409	0.0453139	0.0378731	0.0359834
H3K27me3K36me3	0	0	0	0	0	0	0	0	0	0	0	0	0	0	0	0	0	0	0	0	0	0	0	0	0	0	0
H3K27ac	0.00842886	0.0109687	0.0106502	0.0118935	0.0114209	0.0124707	0.00426235	0.00609105	0.00482297	0.00811463	0.00836022	0.00801261	0.0121653	0.0103647	0.0106864	0.00445897	0.00412767	0.00485814	0.0103614	0.00932249	0.00990549	0.0167073	0.0150194	0.0146039	0.00635792	0.00660108	0.00879583
KSAPSTGGVKKPHR(H33_27_40)
H33_27_40 unmod	0.0621232	0.0748968	0.0568762	0.0942528	0.0851866	0.105671	0.102444	0.0868611	0.102124	0.059027	0.0466534	0.0510563	0.106308	0.0979462	0.0988863	0.0663041	0.070341	0.0703422	0	0	0	0	0	0	0	0	0
H33K36me1	0.0218644	0.0249301	0.0157177	0.020507	0.0183871	0.0195263	0.0214916	0.0161232	0.0191928	0.0166968	0.00337313	0.124796	0.0207362	0.0150176	0.0200686	0.0159858	0.0147429	0.0167633	0	0	0	0	0	0	0	0	0
H33K27me1	0.0173137	0.0185007	0.0111443	0.0213273	0.0210167	0.0187589	0.022752	0.019803	0.0236703	0.0140808	0.0100282	0.0108688	0.021864	0.0225458	0.0193977	0.0171102	0.0162146	0.0179742	0	0	0	0	0	0	0	0	0
H33K27me2	0.0932524	0.0530073	0.0171519	0.0250111	0.0815089	0.0468453	0.0419031	0.0314066	0.0383019	0.0613616	0.0759419	0.0568519	0.0335502	0.0351645	0.0434517	0.0313504	0.0471119	0.167297	0	0	0	0	0	0	0	0	0
H33K36me2	0.0536896	0.0608479	0.0271255	0.0377369	0.0516321	0.0332277	0.0280168	0.0239383	0.0293595	0.0353424	0.0341122	0.0360924	0.0408337	0.0339955	0.0378766	0.0321509	0.0270546	0.0342488	0	0	0	0	0	0	0	0	0
H33K27me3	0.0161501	0.00923912	0.0111216	0.0154071	0.017252	0.0146245	0.0274304	0.0185537	0.0275046	0.0136246	0.010566	0.0110538	0.0183664	0.0171507	0.016108	0.0198368	0.0220682	0.0287549	0	0	0	0	0	0	0	0	0
H33K36me3	0	0	0	0	0	0	0	0	0	0	0	0	0	0	0	0	0	0	0	0	0	0	0	0	0	0	0
H33K27me2K36me1	0.103433	0.167154	0.0829304	0.106622	0.10182	0.10135	0.112494	0.114331	0.129217	0.0847055	0.0835578	0.0688151	0.092349	0.108213	0.0899997	0.0823538	0.0758962	0.0828808	0	0	0	0	0	0	0	0	0
H33K27me1K36me2	0.0878339	0.154435	0.0806616	0.10166	0.095938	0.10672	0.0926988	0.115003	0.137724	0.0874932	0.0701682	0.0733958	0.0960843	0.114478	0.12069	0.101572	0.0866241	0.0776764	0	0	0	0	0	0	0	0	0
H33K27me1K36me1	0.0315525	0.0341514	0.0239686	0.0358827	0.031961	0.0324735	0.0382884	0.0333064	0.0358585	0.024712	0.0194354	0.019496	0.0318416	0.03184	0.0315454	0.0239768	0.025054	0.0282703	0	0	0	0	0	0	0	0	0
H33K27me3K36me1	0.155963	0.160427	0.164588	0.148816	0.147155	0.110728	0.16452	0.138092	0.130942	0.0816833	0.178806	0.131131	0.119597	0.110132	0.104038	0.119579	0.114252	0.111131	0	0	0	0	0	0	0	0	0
H33K27me1K36me3	0	0	0	0	0	0	0	0	0	0	0	0	0	0	0	0	0	0	0	0	0	0	0	0	0	0	0
H33K27me2K36me2	0.220117	0.126469	0.233842	0.258605	0.190419	0.26538	0.225156	0.220588	0.188214	0.369449	0.267372	0.259432	0.288029	0.224541	0.282185	0.29737	0.284544	0.238738	0	0	0	0	0	0	0	0	0
H33K27me2K36me3	0	0	0	0	0	0	0	0	0	0	0	0	0	0	0	0	0	0	0	0	0	0	0	0	0	0	0
H33K27me3K36me2	0.124163	0.0932967	0.261367	0.101689	0.128875	0.114168	0.10274	0.162581	0.118983	0.141955	0.193562	0.149035	0.0985774	0.158012	0.110892	0.166802	0.193903	0.10625	0	0	0	0	0	0	0	0	0
H33K27me3K36me3	0	0	0	0	0	0	0	0	0	0	0	0	0	0	0	0	0	0	0	0	0	0	0	0	0	0	0
H33K27ac	0.0125435	0.0226456	0.0135056	0.0324814	0.0288491	0.0305268	0.0200649	0.0194119	0.0189086	0.00986862	0.00642331	0.00797651	0.0318637	0.0309639	0.0248615	0.0256088	0.0221936	0.0196724	0	0	0	0	0	0	0	0	0
ASAPSTGGVKKPHR(H33K27A_27_40)
H33K27A_unmod	0	0	0	0	0	0	0	0	0	0	0	0	0	0	0	0	0	0	0.132861	0.101154	0.113955	0.151099	0.138546	0.12307	0.117548	0.134994	0.128537
K33K27AK36me1	0	0	0	0	0	0	0	0	0	0	0	0	0	0	0	0	0	0	0.0922563	0.0980457	0.102629	0.131559	0.0995764	0.120349	0.113319	0.11059	0.106656
K33K27AK36me2	0	0	0	0	0	0	0	0	0	0	0	0	0	0	0	0	0	0	0.535874	0.553726	0.540488	0.50014	0.509911	0.506382	0.519854	0.507836	0.496175
K33K27AK36me3	0	0	0	0	0	0	0	0	0	0	0	0	0	0	0	0	0	0	0.239008	0.247074	0.242928	0.217201	0.251966	0.2502	0.249278	0.24658	0.268632
GKGGKGLGKGGAKR(H4_4_17)
H4_4_17 unmod	0.483917	0.499713	0.463868	0.418448	0.407781	0.423249	0.440455	0.450789	0.472209	0.455169	0.473873	0.476171	0.40116	0.427292	0.446799	0.449471	0.485068	0.477573	0.478446	0.457864	0.450761	0.385095	0.437104	0.399015	0.477561	0.460395	0.484874
H4_4_17 K5ac	0.023089	0.021503	0.023479	0.027217	0.026318	0.026252	0.01726	0.017605	0.017848	0.023756	0.023242	0.02285	0.029184	0.028297	0.025607	0.016777	0.015964	0.016263	0.025111	0.026597	0.026496	0.02834	0.026738	0.027624	0.014671	0.013663	0.013698
H4_4_17 K8ac	0.045755	0.044011	0.047545	0.04505	0.046295	0.04437	0.028718	0.027981	0.029221	0.04797	0.046557	0.045839	0.048645	0.049557	0.045992	0.025764	0.028223	0.027145	0.050692	0.052344	0.053227	0.047864	0.046782	0.047999	0.02587	0.024788	0.024398
H4_4_17 K12ac	0.084338	0.078538	0.086053	0.062098	0.059621	0.058888	0.04117	0.038621	0.040759	0.086689	0.084777	0.083529	0.070352	0.070457	0.063386	0.040466	0.043536	0.042871	0.096192	0.095902	0.096915	0.070347	0.064314	0.070447	0.03245	0.033816	0.030503
H4_4_17 K16ac	0.186307	0.191744	0.193803	0.227229	0.221879	0.22033	0.298382	0.276477	0.273351	0.194453	0.189077	0.194689	0.215045	0.217201	0.212841	0.287179	0.259927	0.272662	0.177135	0.17615	0.177425	0.229254	0.217428	0.232457	0.316941	0.315197	0.313229
H4_4_17 K5acK8ac	0.006653	0.006382	0.007006	0.007458	0.007633	0.007788	0.004025	0.003557	0.004059	0.006826	0.007188	0.006558	0.007507	0.007781	0.0071	0.003576	0.003815	0.003526	0.006959	0.007474	0.00723	0.006934	0.007166	0.007467	0.002641	0.002627	0.002357
H4_4_17 K5acK12ac	0.014278	0.013835	0.014935	0.016411	0.016477	0.016484	0.00901	0.008275	0.009128	0.015005	0.015529	0.014428	0.016516	0.016652	0.015096	0.010021	0.009404	0.008953	0.015997	0.016744	0.01697	0.016902	0.015622	0.016302	0.006303	0.00716	0.007167
H4_4_17 K5acK16ac	0.005955	0.005864	0.005856	0.011822	0.011989	0.012565	0.011831	0.026075	0.010909	0.005768	0.005598	0.00567	0.01228	0.010484	0.010729	0.012995	0.010262	0.009641	0.004855	0.005719	0.005495	0.011937	0.010881	0.010709	0.010597	0.010273	0.009062
H4_4_17 K8acK12ac	0.029329	0.025529	0.029234	0.022454	0.029439	0.024678	0.015751	0.014381	0.015019	0.031087	0.026201	0.027209	0.027532	0.024926	0.021485	0.013215	0.012729	0.015763	0.032292	0.034952	0.035732	0.023928	0.022845	0.025584	0.004944	0.014508	0.010262
H4_4_17 K8acK16ac	0.02556	0.025086	0.025906	0.034473	0.036341	0.036113	0.028711	0.026842	0.027843	0.027094	0.026215	0.025951	0.034212	0.032353	0.032086	0.030003	0.026877	0.027287	0.022713	0.026712	0.025303	0.035292	0.033107	0.034945	0.026042	0.02522	0.023393
H4_4_17 K12acK16ac	0.047245	0.046323	0.047929	0.05303	0.054912	0.053252	0.050657	0.043465	0.047907	0.048686	0.047979	0.046898	0.054013	0.050172	0.050251	0.054217	0.046559	0.043084	0.040195	0.046534	0.044226	0.054178	0.051185	0.052951	0.039252	0.037807	0.035424
H4_4_17 K5acK8acK12ac	0.01128	0.011019	0.012848	0.011564	0.012133	0.011411	0.005971	0.006878	0.006529	0.012656	0.012274	0.010707	0.010979	0.010716	0.010729	0.005935	0.007378	0.006818	0.011728	0.012166	0.012869	0.009904	0.009279	0.01104	0.00403	0.00454	0.004105
H4_4_17 K5acK8acK16ac	0.005216	0.004443	0.005859	0.012685	0.012341	0.013528	0.008174	0.010141	0.007758	0.005524	0.005496	0.004642	0.012895	0.010241	0.010985	0.00973	0.009294	0.009017	0.003952	0.004162	0.005497	0.012842	0.011093	0.012068	0.008439	0.00691	0.007816
H4_4_17 K5acK12acK16ac	0.005056	0.004793	0.005346	0.012	0.01361	0.012681	0.008542	0.010336	0.007818	0.005829	0.005748	0.005245	0.011943	0.009704	0.009732	0.011097	0.008833	0.008656	0.006395	0.006029	0.00658	0.012269	0.009664	0.01038	0.00671	0.009029	0.006378
H4_4_17 K8acK12acK16ac	0.022215	0.02116	0.025322	0.036002	0.038041	0.038206	0.027488	0.031981	0.026614	0.025154	0.024262	0.021716	0.038417	0.0319	0.032965	0.029554	0.030254	0.026942	0.021392	0.022238	0.025072	0.04065	0.033594	0.037866	0.02355	0.026925	0.023907
H4_4_17 K5acK8acK12acK16ac	0.003806	5.7e-05	0.00501	0.002059	0.005191	0.000207	0.003853	0.006597	0.003029	0.008335	0.005985	0.007899	0.009322	0.002266	0.004218	0	0.001877	0.0038	0.005946	0.008413	0.010202	0.014261	0.003199	0.003149	0	0.007141	0.003428
KVLR(H4_20_23)
H4_20_23 unmod	0.161923	0.238839	0.132039	0.074777	0.090091	0.084396	0.042184	0.045381	0.041827	0.14961	0.158647	0.148177	0.074004	0.082924	0.076617	0.048331	0.040594	0.039977	0.149514	0.151231	0.156184	0.076068	0.074612	0.08516	0.064544	0.061284	0.055265
H4_20_23 K20me1	0.123695	0.163028	0.12123	0.094498	0.102596	0.098088	0.05471	0.057202	0.051042	0.121714	0.12499	0.121602	0.087469	0.092811	0.104189	0.052463	0.052071	0.050299	0.11825	0.112889	0.119995	0.102422	0.096182	0.107297	0.075022	0.068069	0.064404
H4_20_23 K20me2	0.686494	0.574	0.717465	0.795339	0.774209	0.786364	0.847092	0.843357	0.85265	0.699736	0.688563	0.702519	0.800293	0.791809	0.780999	0.846822	0.8543	0.858976	0.705687	0.70728	0.696047	0.786927	0.795608	0.77566	0.817022	0.834351	0.831828
H4_20_23 K20me3	0.027752	0.023895	0.029204	0.035215	0.032968	0.030923	0.055993	0.053987	0.054476	0.028826	0.027567	0.027508	0.038035	0.03222	0.037946	0.052381	0.05302	0.050732	0.026403	0.028351	0.027475	0.03429	0.033448	0.031653	0.043256	0.036236	0.048495
H4_20_23 K20ac	0.000136	0.000238	6.3e-05	0.000171	0.000135	0.00023	2.1e-05	7.3e-05	6e-06	0.000113	0.000233	0.000194	0.000199	0.000236	0.000249	3e-06	1.5e-05	1.6e-05	0.000146	0.000249	0.000299	0.000293	0.000151	0.00023	0.000156	5.9e-05	8e-06
