# Supplementary material for: Multi-omic profiling of histone variant H3.3 lysine 27 methylation reveals a distinct role from canonical H3 in stem cell differentiation
Source: Royal Society of Chemistry journal article supplement (doi:10.1039/d1mo00352f), 2022-01-12
Supplement: d1mo00352f9.xlsx [file d1mo00352f9.xlsx]

## Sheet: Sheet1
Protein	NumPeptides	PeptideSequences	Normalize	WT_Day0_B1	WT_Day0_B2	WT_Day0_B3	WT_Day3_B1	WT_Day3_B2	WT_Day3_B3	WT_Day6_B1	WT_Day6_B2	WT_Day6_B3	H33A_KO_Day0_B1	H33A_KO_Day0_B2	H33A_KO_Day0_B3	H33A_KO_Day3_B1	H33A_KO_Day3_B2	H33A_KO_Day3_B3	H33A_KO_Day6_B1	H33A_KO_Day6_B2	H33A_KO_Day6_B3	H33K27A_Day0_B1	H33K27A_Day0_B2	H33K27A_Day0_B3	H33K27A_Day3_B1	H33K27A_Day3_B2	H33K27A_Day3_B3	H33K27A_Day6_B1	H33K27A_Day6_B2	H33K27A_Day6_B3
sp|Q05793|PGBM_MOUSE	101	AAGVPSASITWR;AAGVPSASITWRK;AEMLQALASLEAVLLQTVYNTK;AFAYLQVPER;AGLSSGFVGC[+57.0214635]VR;ALEVEEC[+57.0214635]R;ALSSAGQHVAR;AMDFNGILTIR;AMLQVHGGSGPR;APLPWQHR;AQAGANTRPC[+57.0214635]PS;ATATAC[+57.0214635]RPC[+57.0214635]PC[+57.0214635]PYIDASR;AYDGLSLPEDTETVTASR;C[+57.0214635]APGYYGNPSQGQPC[+57.0214635]HR;C[+57.0214635]DGDFDC[+57.0214635]EDR;C[+57.0214635]ESC[+57.0214635]APGYEGNPIQPGGK;C[+57.0214635]F…		3.81438	3.75457	3.77627	7.76041	7.50353	7.44897	9.71298	9.86403	9.59241	3.88245	3.85561	3.62981	8.1981	7.99439	8.09277	9.93967	10.1274	10.1663	3.76151	3.56173	3.5895	7.41052	7.6527	7.58549	9.93625	9.81312	9.57168
sp|P24547|IMDH2_MOUSE	22	AMMYSGELK;AMMYSGELKFEK;DIDFLKEEEHDR;FGVPVIADGGIQNVGHIAK;FLEEIMTK;FVPYLIAGIQHSC[+57.0214635]QDIGAK;GKLPIVNENDELVAIIAR;GMGSLDAMDK;GMGSLDAMDKHLSSQNR;HGFC[+57.0214635]GIPITDTGR;KYEQGFITDPVVLSPK;LPIVNENDELVAIIAR;NLIDAGVDALR;QLLC[+57.0214635]GAAIGTHEDDKYR;REDLVVAPAGVTLK;RFGVPVIADGGIQNVGHIAK;TSSAQVEGGVHSLHSYEK;VAQGVSGAVQDK;VAQGVSGAVQDKGSIHK;VGMGSGSIC[+57.0214635]ITQEVLAC[+57.0214635]GRPQATAVYK;YEQGFITDP…		7.30088	7.28138	7.37581	6.16469	6.12838	6.09521	5.60808	5.6721	5.65387	7.26549	7.26356	7.44452	6.12233	5.97838	6.09699	5.79144	5.87986	5.78715	7.37556	7.39812	7.45078	6.08457	6.21298	6.33221	5.57423	5.72226	5.62216
sp|Q61598|GDIB_MOUSE	30	AYDATTHFETTC[+57.0214635]DDIK;AYDATTHFETTC[+57.0214635]DDIKDIYK;DLGTDSQIFISR;EIRPALELLEPIEQK;EPEKEIRPALELLEPIEQK;FDLGQDVIDFTGHSLALYR;FKLPGQPPASMGR;FLVYVANFDEK;FLVYVANFDEKDPR;FVSISDLFVPK;FVSISDLFVPKDLGTDSQIFISR;IYKVPSTEAEALASSLMGLFEK;KFDLGQDVIDFTGHSLALYR;KSDIYVC[+57.0214635]MISFAHNVAAQGK;LSAIYGGTYMLNKPIEEIIVQNGK;MLLFTEVTR;MTGSEFDFEEMK;MTGSEFDFEEMKR;QLIC[+57.0214635]DPSYVK;QLIC[+57.0214635]DPSYVKDR…		7.20513	7.18374	7.28783	7.05174	6.96746	6.89108	7.1402	7.12976	7.04527	7.16857	7.13424	7.16491	7.09357	6.91455	6.79903	7.24999	7.36117	7.32728	7.05197	7.09225	7.13178	6.90795	6.95486	6.73645	6.77711	7.00906	7.12822
sp|Q9D8E6|RL4_MOUSE	26	AASLKSNYNLPMHK;APIRPDIVNFVHTNLR;APIRPDIVNFVHTNLRK;EAVQLLKK;FC[+57.0214635]IWTESAFR;GPC[+57.0214635]IIYNEDNGIIK;GPC[+57.0214635]IIYNEDNGIIKAFR;GTADKKPAVGK;IEEVPELPLVVEDK;IEEVPELPLVVEDKVEGYK;KLDELYGTWR;KLEAAATALATK;KPTTEEKKPAA;LAPGGHVGR;LDELYGTWR;LEAAATALATK;NIPGITLLNVSK;NIPGITLLNVSKLNILK;NNRQPYAVSELAGHQTSAESWGTGR;QPYAVSELAGHQTSAESWGTGR;RGPC[+57.0214635]IIYNEDNGIIK;SGQGAFGNMC[+57.0214635]R;SGQGAFGN…		8.80505	8.72236	8.7939	7.94419	8.02135	7.81196	7.55943	7.47709	7.5303	8.736	8.6868	8.86636	7.85687	7.8845	8.07434	7.63179	7.33047	7.67787	8.68158	8.70245	8.90948	7.85827	8.01028	8.06295	7.46348	7.44494	7.38584
sp|P14211|CALR_MOUSE	23	AKIDDPTDSKPEDWDKPEHIPDPDAK;C[+57.0214635]KDDEFTHLYTLIVRPDNTYEVK;DDEFTHLYTLIVRPDNTYEVK;DEDEDEEDEKEEDEEESPGQAK;DKGLQTSQDAR;DMHGDSEYNIMFGPDIC[+57.0214635]GPGTK;DMHGDSEYNIMFGPDIC[+57.0214635]GPGTKK;DPDAAKPEDWDER;EEDEEESPGQAKDEL;EQFLDGDAWTNR;EQFLDGDAWTNRWVESK;FEPFSNKGQTLVVQFTVK;FYGDLEKDK;GQTLVVQFTVK;HEQNIDC[+57.0214635]GGGYVK;IDDPTDSKPEDWDKPEHIPDPDAK;IDNSQVESGSLEDDWDFLPPKK;IKDPDAAKPEDWDER;KPEDWDEEMDGE…		6.51757	6.17615	6.33273	7.30794	7.06194	7.04876	7.57359	7.48801	7.42362	6.46564	6.41875	6.66621	7.48495	7.41967	7.61825	8.60407	8.47924	8.50291	6.68319	6.55765	6.456	7.3108	7.1334	7.57357	7.81021	7.48198	7.30611
sp|P06745|G6PI_MOUSE	20	ELFEADPER;EVMQMLVELAK;EWFLEAAKDPSAVAK;FAAYFQQGDMESNGK;FAAYFQQGDMESNGKYITK;FNNFSLNLNTNHGHILVDYSK;HFVALSTNTAK;IEPELEGSSAVTSHDSSTNGLISFIK;ILLANFLAQTEALMK;KIEPELEGSSAVTSHDSSTNGLISFIK;LTPFILGALIAMYEHK;MIPC[+57.0214635]DFLIPVQTQHPIR;NLVNKEVMQMLVELAK;SITDIINIGIGGSDLGPLMVTEALKPYSK;SNTPIKVDGK;TFTTQETITNAETAK;TFTTQETITNAETAKEWFLEAAK;TLASLSPETSLFIIASK;VFEGNRPTNSIVFTK;VWFVSNIDGTHIAK		7.31866	7.31537	7.41843	7.05251	6.95159	7.0463	6.88573	6.9671	6.86722	7.28716	7.30068	7.37924	7.04537	6.89485	6.7811	7.00609	7.01293	7.00748	7.28631	7.38249	7.42972	6.906	6.97193	6.81314	6.50295	6.84652	6.89854
sp|P63260|ACTG_MOUSE	11	DLYANTVLSGGTTMYPGIADR;GYSFTTTAEREIVR;IWHHTFYNELR;KDLYANTVLSGGTTMYPGIADR;LC[+57.0214635]YVALDFEQEMATAASSSSLEK;MEEEIAALVIDNGSGMC[+57.0214635]K;QEYDESGPSIVHR;QEYDESGPSIVHRK;VAPEEHPVLLTEAPLNPK;VAPEEHPVLLTEAPLNPKANR;YPIEHGIVTNWDDMEK		9.4489	9.47503	9.72092	9.58291	9.64433	9.69321	9.05386	9.39602	9.34155	9.40837	9.60146	9.65177	9.60353	9.52282	9.63887	9.61316	10.1363	9.94377	9.48982	9.673	9.58938	9.51333	9.74875	9.80733	9.28241	9.47631	9.27202
sp|Q9WTQ5|AKA12_MOUSE	53	AEADASGNLTK;AEDSGAEQLASEIEPSR;AEDSGAEQLASEIEPSREESWVSIK;AEPEILELESK;AEVGQEGEAGQFDGEK;ALGSLEGSPSLPDQDK;AQENVELPQLK;AQTEEDDLQEPK;ASEMITTLAVESASVK;ASSSDDEGGPR;C[+57.0214635]APLATEVFDEK;C[+57.0214635]QETESNEEQSISPEK;C[+57.0214635]QETESNEEQSISPEKR;DEGEGAEASVGAGDHQEPGVETVGESASK;DEKEHAADGPQHQSLAK;DITAEATPALAQTLPGGK;DSEVMEVAR;DVLEPTQALAAGAVPILAK;EDDLETSEK;EDSQVPATQTLQR;EHAADGPQHQSLAK;EKEPTKPLESPTSPVSNETT…		6.61776	6.45054	6.40309	6.63221	6.14403	6.29312	6.03935	5.93397	5.97871	6.37453	6.59295	6.85454	6.2684	6.09975	6.18819	5.94535	6.11708	5.69006	6.70559	6.57986	6.37707	6.49765	5.96343	6.69493	6.2201	6.0926	6.10663
sp|Q02053|UBA1_MOUSE	37	AAVASLLQSVQVPEFTPK;AENYDISPADR;ATLPSPDKLPGFK;DDDSNFHMDFIVAASNLR;DEFEGLFKQPAENVNQYLTDSK;DNPGVVTC[+57.0214635]LDEAR;ERLDQPMTEIVSR;FEVQGLQPNGEEMTLK;GNVQVVIPFLTESYSSSQDPPEK;HQYYNQEWTLWDR;IHVSDQELQSANASVDDSR;IHVSDQELQSANASVDDSRLEELK;IYDDDFFQNLDGVANALDNIDAR;KLAYVAAGDLAPINAFIGGLAAQEVMK;KPLLESGTLGTK;LAGTQPLEVLEAVQR;LAYVAAGDLAPINAFIGGLAAQEVMK;LDQPMTEIVSR;LKSDTAAAAVR;MLQTSSVLVSGLR;MYPIDFEK;NEEDATELVGLAQAVN…		7.84597	7.85146	8.0038	7.73007	7.69086	7.73015	7.64043	7.67754	7.59609	7.75169	7.79432	7.998	7.72117	7.62193	7.62159	7.70978	8.0192	7.737	7.66365	7.86058	7.83368	7.60409	7.82043	7.89255	7.37769	7.53513	7.60759
sp|O88545|CSN6_MOUSE	10	ASEAGEVPFNHEILR;EAYALC[+57.0214635]HC[+57.0214635]LPVLSTDK;ELEFLGWYTTGGPPDPSDIHVHK;IIIDKEYYYTK;MTATGSGENSTVAEHLIAQHSAIK;NIEVMNSFELLSHTVEEK;QVC[+57.0214635]EIIESPLFLK;SQEGRPMQVIGALIGK;TC[+57.0214635]NTMNQFVNK;TC[+57.0214635]NTMNQFVNKFNVLYDR		3.14952	3.1959	3.36686	2.77206	2.8143	2.92415	2.72906	2.7655	2.8378	3.19899	3.12447	3.00742	2.74454	2.73366	2.85087	2.82835	2.85077	2.82835	3.15663	3.3473	3.34659	2.70287	2.69921	2.92382	2.47392	2.72162	2.73314
sp|P26516|PSMD7_MOUSE	14	DIKDTTVGTLSQR;DLGLPTEAYISVEEVHDDGTPTSK;DTTVGTLSQR;ITNQVHGLK;LHKNDIAINELMK;NDIAINELMK;NDIAINELMKR;SVVALHNLINNK;TFEHVTSEIGAEEAEEVGVEHLLR;TNDQMVVVYLASLIR;VVGVLLGSWQK;VVGVLLGSWQKK;VVVHPLVLLSVVDHFNR;YC[+57.0214635]PNSVLVIIDVKPK		5.21337	5.15277	5.11785	4.72387	4.50103	4.49579	4.53605	4.57732	4.4589	5.2123	5.19785	5.3509	4.72356	4.4816	4.45671	4.68137	4.49702	4.65241	5.35126	5.25334	5.2228	4.78192	4.54796	4.57841	4.53619	4.66142	4.52187
sp|P48678|LMNA_MOUSE	27	AAYEAELGDAR;AGQVVTIWASGAGATHSPPTDLVWK;AQHEDQVEQYKK;AQNTWGC[+57.0214635]GSSLR;EAALSTALSEK;EAALSTALSEKR;EGDLLAAQAR;GSHC[+57.0214635]SGSGDPAEYNLR;IDSLSAQLSQLQK;ITESEEVVSR;LADALQELR;LALDMEIHAYR;LEAALGEAKK;LKDLEALLNSK;LQEKEDLQELNDR;MQQQLDEYQELLDIK;NSNLVGAAHEELQQSR;SGAQASSTPLSPTR;SLETENAGLR;SLTMVEDNEDDDEDGEELLHHHR;SNEDQSMGNWQIR;SVGGSGGGSFGDNLVTR;TALINSTGEEVAMR;TALINSTGEEVAMRK;TVLC[+57.0214635]GTC[+57.0…		4.55729	4.49681	4.49588	4.00901	3.80144	3.78446	4.49205	4.48246	4.51964	4.19892	4.43137	4.46521	4.78358	4.6711	4.83577	6.03776	6.28473	6.05245	4.10274	4.20378	4.40844	3.87681	3.83101	4.09912	4.99181	4.48624	4.31916
sp|Q61937|NPM_MOUSE	13	ADKDYHFK;DELHIVEAEAMNYEGSPIK;GPSSVEDIKAK;MQASIEKGGSLPK;MSVQPTVSLGGFEITPPVVLR;MSVQPTVSLGGFEITPPVVLRLK;MTDQEAIQDLWQWR;MTDQEAIQDLWQWRK;SAPGGGNKVPQK;SNQNGKDLKPSTPR;TPKGPSSVEDIK;TVSLGAGAKDELHIVEAEAMNYEGSPIK;VDNDENEHQLSLR		7.7107	7.87219	7.76524	6.73569	6.71832	6.41289	5.62045	6.01964	5.97375	7.67103	8.02358	8.14807	6.69716	6.78582	6.84804	5.80071	5.99389	5.80054	8.08629	7.96322	7.94966	7.2001	6.92072	7.27332	5.95881	6.144	6.27984
sp|Q8R081|HNRPL_MOUSE	19	AITHLNNNFMFGQK;AKASLNGADIYSGC[+57.0214635]C[+57.0214635]TLK;ASLNGADIYSGC[+57.0214635]C[+57.0214635]TLK;ISRPGDSDDSR;LC[+57.0214635]FSTAQHAS;MAAAGGGGGGGR;NDQDTWDYTNPNLSGQGDPGSNPNKR;NGVQAMVEFDSVQSAQR;NNRFSTPEQAAK;NPNGPYPYTLK;QPAIMPGQSYGLEDGSC[+57.0214635]SYK;QPAIMPGQSYGLEDGSC[+57.0214635]SYKDFSESR;SDALETLGFLNHYQMK;SKPGAAMVEMADGYAVDR;SSSGLLEWDSK;TENAGDQHGGGGGGGSGAAGGGGGENYDDPHK;TPASPVVHIR;VFNVFC[+57.…		7.10516	7.06051	7.20166	6.87947	6.68397	6.48444	6.46348	6.41259	6.47907	6.88668	6.78499	6.95923	6.77639	6.67015	6.77767	6.36236	6.3356	6.3091	6.81057	6.89224	7.02885	6.60192	6.76856	6.87384	6.24594	6.41996	6.37279
sp|Q9QXK7|CPSF3_MOUSE	11	AVEC[+57.0214635]EEGSEDDESLR;AVEC[+57.0214635]EEGSEDDESLREMVELAAQR;ELFESWC[+57.0214635]TDKR;FC[+57.0214635]NTVHDIVNR;HIMSEPEEITTMSGQK;LTGDVEELEIQEKPALK;LYEALTPVH;NFNYHILSPC[+57.0214635]DLSNYTDLAMSTVK;TANINLETR;VMGFLADKKPEQGQR;WLLSDYVK		3.19262	3.2156	3.24983	2.82105	2.83651	2.87306	2.49458	2.48651	2.4131	3.14198	3.17836	3.14979	3.04455	2.8338	2.70862	2.48161	2.64092	2.45419	2.9745	3.10679	3.1281	2.64056	3.11904	2.95706	2.35953	2.47487	2.27481
sp|P27641|XRCC5_MOUSE	16	C[+57.0214635]FSVLGFC[+57.0214635]K;DDEAAAVALSSLVHALDELNMVAIVR;DEGPGSSITAEEATK;DQYQNITVC[+57.0214635]R;EEAIQFSEEQR;ETVYC[+57.0214635]LNDDDETEVSK;ETVYC[+57.0214635]LNDDDETEVSKEDTIQGYR;FNSFLEALR;GDLDSGLDHLKPSFPQK;HLMLPDFDLLEDIGNK;NQVTAQDVFQDNHEEGPAAK;SGISLQFFLPFPIDK;SMPWPC[+57.0214635]QLTIGPNLSIK;SNPQVGVAFPYIK;VGSVNPVENFR;YGSDIIPFSKVDEEQMK		4.39598	4.32799	4.48233	3.43505	3.36391	3.40063	3.00346	2.88592	2.91127	4.36757	4.3224	4.43812	3.34446	3.28668	3.29449	2.68549	2.46716	2.53126	4.39256	4.4613	4.52161	3.45061	3.41441	3.46132	2.84917	2.91887	3.0276
sp|Q8BGQ7|SYAC_MOUSE	37	AEEIVNGMIEAAKPVYTQDC[+57.0214635]PLAAAK;ASEWVQQVSGLMDGK;AVFDETYPDPVR;DIINEEEVQFLK;DNFWEMGDTGPC[+57.0214635]GPC[+57.0214635]SEIHYDR;EIADLGEALATAVIPQWQK;EIADLGEALATAVIPQWQKDEQR;ESDGVLKPLPK;GAGDEDLIMLDIYAIEELRAK;GAMSTQQIK;GGYVLHIGTIYGNLK;GLEATDDSPK;GLVVDMNGFEEER;GLVVDMNGFEEERR;HNDLDDVGK;IQSLGDC[+57.0214635]K;ITC[+57.0214635]LC[+57.0214635]QVPQNAANR;IVAVTGAEAQK;KAEEIVNGMIEAAKPVYTQDC[+57.0214635]PLAAA…		7.36191	7.31561	7.44316	6.35823	6.2335	6.20915	5.88301	5.8841	5.84608	7.25461	7.25944	7.26306	6.32504	6.11953	6.13924	5.94614	6.09226	5.9757	7.30741	7.37372	7.38913	6.26449	6.33822	6.41909	5.67895	5.84332	5.83304
sp|Q9D8N2|DEN10_MOUSE	5	DIVSQFGMETVILHTALMLK;EIGQLIVQSAEDPEKSDSQVIQDIALK;IEAVQEFTR;MMESYIAVLTK;TWFYVTTVEVPDSSVLK		-1.0905	-0.881673	-0.907361	0.306147	0.398284	0.427591	0.224108	0.348813	0.219854	-0.950779	-0.705803	-0.663454	0.600623	0.349434	0.149417	0.547348	0.662428	0.755951	-0.908033	-0.706262	-0.754796	0.337614	0.45065	0.445975	0.331278	0.224531	0.26483
sp|P80313|TCPH_MOUSE	31	AEKDNAEIR;AIKNDSVVAGGGAIEMELSK;ATISNDGATILK;EGTDSSQGIPQLVSNISAC[+57.0214635]QVIAEAVR;GGAEQFMEETER;GKATISNDGATILK;GMDKLIVDGR;IALLNVELELK;IKEIAVTVK;INALTAASEAAC[+57.0214635]LIVSVDETIK;INALTAASEAAC[+57.0214635]LIVSVDETIKNPR;KTFSYAGFEMQPK;KVQGGALEESQLVAGVAFK;LLDVVHPAAK;LPIGDVATQYFADR;LPIGDVATQYFADRDMFC[+57.0214635]AGR;MVVDAVMMLDELLQLK;NDSVVAGGGAIEMELSK;QLC[+57.0214635]DNAGFDATNILNK;QLC[+57.0214635]DN…		7.99873	8.02215	8.11944	7.26788	7.25431	7.21942	6.88724	6.88897	6.86341	7.98087	7.90598	7.88953	7.28343	7.13701	7.08544	6.93949	6.96223	6.89501	7.84419	7.96776	8.00119	7.15015	7.30972	7.29806	6.70921	6.95225	6.89843
sp|Q8VE70|PDC10_MOUSE	2	ENPGLTQDIIMK;MAADDVEEYMIERPEPEFQDLNEK		-0.975523	-1.0073	-0.977818	-1.19861	-1.30184	-0.8134	-1.4876	-0.798573	-0.914241	-0.85254	-0.710252	-0.405537	-1.52015	-0.807037	-0.665017	-0.583468	-0.973908	-0.500829	-0.50019	-0.943398	-0.693424	-0.735541	-1.50768	-0.490453	-0.542551	-1.07522	-1.018
sp|Q9CWJ9|PUR9_MOUSE	24	AFTHTAQYDEAISDYFR;AFTHTAQYDEAISDYFRK;DGQVIGIGAGQQSR;DVSELTGFPEMLGGR;EVSDGIVAPGYEEEALK;EVSDGIVAPGYEEEALKILSK;GAVDIPAAASFK;HVSPAGAAVGVPLSEDEAR;LSGVSVSSDAFFPFR;MSSFGDFVALSDIC[+57.0214635]DVPTAK;NGNYC[+57.0214635]VLQMDQSYKPDENEVR;NNGVVDKSLFSNIVTK;RAEISNAIDQYVTGTIGEGEDLVK;SGVAYIVAPSGSTADK;SLASLGLSLVASGGTAK;SLFSNIVTK;TLHPAVHAGILAR;VC[+57.0214635]MVYDLYPTLTPLAVAYAR;VTVVC[+57.0214635]EPEDYAGVAAEMHGSDSK;V…		7.34082	7.34606	7.45823	6.03353	6.09276	5.95505	5.60086	5.57805	5.55985	7.22098	7.23479	7.42271	6.00653	5.86695	5.95278	5.64647	5.80945	5.69019	7.2637	7.30486	7.30981	5.86132	6.10892	6.13413	5.51687	5.57432	5.59706
sp|P02468|LAMC1_MOUSE	67	AEQQTADQLLAR;AVEIYASVAQLTPVDSEALENEANK;C[+57.0214635]DC[+57.0214635]HALGSTNGQC[+57.0214635]DIR;C[+57.0214635]DQC[+57.0214635]EENYFYNR;C[+57.0214635]ELC[+57.0214635]DDGYFGDPLGSNGPVR;C[+57.0214635]IYNTAGFYC[+57.0214635]DR;C[+57.0214635]KEGFFGNPLAPNPADK;C[+57.0214635]KPGFFNLESSNPK;C[+57.0214635]LPFFNDRPWR;C[+57.0214635]NGHASEC[+57.0214635]VK;C[+57.0214635]SC[+57.0214635]KPGVMGDK;C[+57.0214635]SC[+57…		4.8517	4.4886	4.65347	7.28406	6.74547	6.84924	8.91411	9.21798	8.47919	4.90308	4.81464	4.88625	7.79767	7.59824	7.73025	9.53338	9.33704	10.0667	4.68383	4.84031	4.77503	7.07276	7.03429	7.31453	9.24718	9.29103	8.44435
sp|P26039|TLN1_MOUSE	75	AAAFEDQENETVVVK;AAAFEDQENETVVVKEK;AAMEPIVISAK;AC[+57.0214635]EFAGFQC[+57.0214635]QIQFGPHNEQK;ADAEGESDLENSR;ADAEGESDLENSRK;AGALQC[+57.0214635]SPSDVYTK;AGALQC[+57.0214635]SPSDVYTKK;AGFLDLKDFLPK;AIAVTVQEMVTK;ALDGDFTEENR;ALDGDFTEENRAQC[+57.0214635]R;ALDYYMLR;ALGDLISATK;ALSTDPASPNLK;ASGHPGDPESQQR;ASVPTIQDQASAMQLSQC[+57.0214635]AK;AVAEQIPLLVQGVR;AVASAAAALVLK;AVTDSINQLITMC[+57.0214635]TQQAPGQK;C[+57.021…		5.64327	5.76497	5.8585	6.70579	6.61868	6.63608	6.36777	6.3093	6.50038	5.74134	5.90337	6.01956	6.54829	6.45566	6.53017	6.8097	7.13301	6.64511	5.79949	5.93307	5.89777	6.55925	6.59017	6.68904	6.3987	6.31988	6.42225
sp|Q80UG5-3|SEPT9_MOUSE;sp|Q80UG5|SEPT9_MOUSE	15	ADTLTLEER;EFDEDAEDR;EMIPFAVVGSDHEYQVNGK;FINDQYEK;ITADLLSNGIDVYPQK;ITADLLSNGIDVYPQKEFDEDAEDR;LTVIDTPGFGDHINNENC[+57.0214635]WQPIMK;QVESTASAAGPSR;SITHDIEEK;STLINTLFK;TEITIVKPQESVLR;VETPASKIPEGSAVPATDAAPK;VVNIVPVIAK;WGTIEVENTTHC[+57.0214635]EFAYLR;YLQEEVNINR		3.54108	3.43674	3.43006	3.80801	3.6096	3.76026	3.76116	3.8851	3.73082	3.55046	3.58296	3.62133	3.54815	3.4856	3.74658	3.61243	3.50035	3.45279	3.19092	3.30818	3.38475	3.60922	3.41165	3.78126	3.73973	3.62518	3.7209
sp|O88322|NID2_MOUSE	40	ADPGLVDVGTSSPGSDR;AELDGSER;AFALYSEDEGVLR;AITVDPIRGNLYWTDWNR;ASLEAGAEPETIITSGLISPEGLAIDHFR;ASPWPYPAPGNWPSYR;C[+57.0214635]GPNSVC[+57.0214635]VNLVGSYR;C[+57.0214635]HPGTGVDYTC[+57.0214635]EC[+57.0214635]TPGFQGDGR;C[+57.0214635]SQHAFC[+57.0214635]TDYTTGFC[+57.0214635]C[+57.0214635]HC[+57.0214635]QSR;DDQYVPQC[+57.0214635]DDLGHFIPLQC[+57.0214635]HGK;DGVISVNKDSGQFTDEFLPEQR;DIGLPNGLTFDPFSK;DSGQFTDEFLPEQ…		2.65986	2.73846	2.62861	5.89195	5.63762	5.6285	8.36674	8.68313	8.01557	2.58962	2.78866	2.67744	6.50059	6.28151	6.3882	8.4111	8.44218	8.8997	2.50862	2.43702	2.60469	5.57812	5.76771	5.83891	8.38207	8.50849	7.93427
sp|Q8BKC5|IPO5_MOUSE	40	AIGTEPDSDVLSEIMHSFAK;AKLEEHFK;ATAAFILANEHNVALFK;C[+57.0214635]IEVMGDGC[+57.0214635]LNNEHFEELGGILK;EFQQYLPVVMGPLMK;EGFVEYTEQVVK;EHIMQMLQNPDWK;ELKEGFVEYTEQVVK;ENVNATENC[+57.0214635]ISAVGK;FLFDSVSSQNMGLR;FMQDASDVMQLLLK;FVPYYDLFMPSLK;FYFHDGVR;HFADLLPGFLQAVNDSC[+57.0214635]YQNDDSVLK;HIVENAVQK;IC[+57.0214635]DIAAELAR;IFSIIAEGEMHEAIK;IFSIIAEGEMHEAIKHEDPC[+57.0214635]AK;ITFLLQAIR;KQAEETYENIPGR;LC[+57.021…		7.54729	7.72851	7.75083	6.72286	6.94458	6.77779	6.17586	6.2408	6.38939	7.58526	7.50259	7.53426	6.67383	6.65317	6.81483	6.51408	6.40744	6.45519	7.65197	7.59061	7.74033	6.75036	6.69748	6.68827	6.29202	6.28798	6.38484
sp|Q8BK58|HBAP1_MOUSE	12	AVELQVLSANGAEPR;FWAYADYK;GASALTEPLAPR;GGALEGDSEESVSSNGGHFAELPC[+57.0214635]AR;HMVTLSPGQVLFVPR;INVVNPDLK;IPYEESSVFSK;MVAQLLIQGK;TDVFQEVVWSDFGFPGR;TVGEEGEPVKPFTPEK;VQEEHMEVEQAQGPSLTSR;YFVTLFEDK		4.81611	4.80063	4.87654	2.63006	2.73079	2.82166	1.56146	1.73828	1.58906	4.70377	4.80259	5.00241	2.43843	2.51306	2.45534	1.4619	1.66166	1.59353	4.72064	4.86617	4.82187	2.44893	2.77677	3.00343	1.28169	1.5664	1.69665
sp|Q08122-2|TLE3_MOUSE	5	FTVAESC[+57.0214635]DR;NDAPTPGTSTTPGLR;QINTLSHGEVVC[+57.0214635]AVTISNPTR;SMPGKPPGMDPIASALR;SPMVSFGAVGFDPHPPMR		-0.549306	-0.497121	-0.451958	-1.10171	-1.07729	-1.08114	-1.40431	-1.4741	-1.59986	-0.823828	-0.438363	-0.223167	-1.1869	-1.42177	-1.4395	-1.03754	-0.510009	-1.22758	-0.772001	-0.510089	-0.590243	-1.24284	-1.12929	-0.882961	-1.63218	-1.39107	-1.25315
sp|Q9JI13|SAS10_MOUSE	8	EENSAEEQALEEQNAK;ESPELLELIEDLQAK;KLYYDTDYGSK;LTEVKDELEPLLQLVEK;LYYDTDYGSK;QAAAVALTDEPDFDGAALK;QSQQEVEEEEREEEEEAQIIQR;YSGELSGIR		2.70874	2.68749	2.59107	1.34315	1.26825	1.01415	0.548231	0.740868	0.696706	2.60324	2.72612	2.982	1.28242	1.32158	1.31732	0.698054	0.919162	0.592209	2.73533	2.83009	2.63898	1.2511	1.3869	1.6841	0.353776	0.740009	0.836277
sp|Q9DBH5|LMAN2_MOUSE	6	DNVDDPTGNFR;DWEMHVHFK;LFQLTVER;LPTGYYFGASAGTGDLSDNHDIISIK;TPEEESIDWTK;WSELAGC[+57.0214635]TADFR		3.59545	3.51187	3.45119	3.85571	3.87271	3.69512	4.12299	4.13855	4.07828	3.56884	3.5113	3.37653	4.13512	3.83579	3.95149	4.58822	4.59257	4.5832	3.39597	3.46012	3.60215	3.7631	3.95555	3.65916	4.21392	4.07072	3.85099
sp|Q9D1P4|CHRD1_MOUSE	8	FDPEANSDDAC[+57.0214635]TYHPGVPVFHDALK;FQEHIIQAPKPVEAIK;HNSEKPPEPVKPEVK;KAEPMQWASLELPTTK;RPSPDEPMTNLELK;SYVTMTATK;TSDFNTFLAQEGC[+57.0214635]TR;TTDFSDFLSIVGC[+57.0214635]TK		3.1244	2.99258	3.17491	2.10349	1.70819	1.68593	1.89188	1.64835	1.67425	3.09909	2.81589	2.8957	2.19263	1.84713	1.91646	1.80998	1.56959	1.53978	2.96467	2.86924	3.10183	1.78817	1.93427	2.04851	1.4064	1.40114	1.58047
sp|Q9DBG6|RPN2_MOUSE	21	EDQVIQLMNTIFSK;EETVLATVQALQTASHLSQQADLR;FELDTSER;ISTEVGITNVDLSTVDKDQSIAPK;LGKEETVLATVQALQTASHLSQQADLR;LMDHVGTEPSMK;LMDHVGTEPSMKEDQVIQLMNTIFSK;LQVSNVLSQPLAQAAVK;LQVSNVLSQPLAQAAVKLEHAK;LSSGYYDFSVR;MLAQHAVKR;NFESLSEAFSVASAAAALSQNR;NIVEEIEDLVAR;NPILWNVADVVIK;QEIQHLFR;TGQEVVFVAEPDNK;TGQEVVFVAEPDNKNVYK;TPFSLVGNVFELNFK;YHVPVVVVPEGSTSDTQEQAILR;YIANTVELR;YLAVLGTVTFLAGNR		5.51315	5.4324	5.59478	5.99156	5.97695	5.98658	6.2624	6.27457	6.23076	5.60835	5.62186	5.81844	6.18232	6.04296	6.15526	6.75235	6.70634	6.9323	5.65741	5.64671	5.65832	6.03703	6.07129	6.16043	6.45837	6.26859	6.19275
sp|P56959|FUS_MOUSE	10	AAIDWFDGK;AAIDWFDGKEFSGNPIK;AGDWKC[+57.0214635]PNPTC[+57.0214635]ENMNFSWR;APKPDGPGGGPGGSHMGGNYGDDR;C[+57.0214635]PNPTC[+57.0214635]ENMNFSWR;GEATVSFDDPPSAK;KTGQPMINLYTDR;LKGEATVSFDDPPSAK;TGQPMINLYTDR;TGQPMINLYTDRETGK		6.55162	6.30912	6.41464	6.11873	5.91123	5.7291	5.94371	6.04291	5.8942	6.35819	6.49085	6.77865	6.12403	5.96011	6.17357	5.98379	5.92065	5.88724	6.55959	6.59208	6.47431	6.05129	6.04554	6.48177	5.81154	5.98803	6.0456
sp|P08249|MDHM_MOUSE	22	AGAGSATLSMAYAGAR;AKAGAGSATLSMAYAGAR;ANTFVAELKGLDPAR;EGVVEC[+57.0214635]SFVQSK;ETEC[+57.0214635]TYFSTPLLLGK;ETEC[+57.0214635]TYFSTPLLLGKK;FVFSLVDAMNGK;FVFSLVDAMNGKEGVVEC[+57.0214635]SFVQSK;GC[+57.0214635]DVVVIPAGVPR;GYLGPEQLPDC[+57.0214635]LK;GYLGPEQLPDC[+57.0214635]LKGC[+57.0214635]DVVVIPAGVPR;HGVYNPNKIFGVTTLDIVR;IFGVTTLDIVR;IQEAGTEVVK;IQEAGTEVVKAK;LTLYDIAHTPGVAADLSHIETR;MIAEAIPELK;TIIPLISQC[+57.…		8.18735	8.26835	8.33438	8.82008	8.8687	8.70411	8.97044	8.91497	8.99131	8.22015	8.12244	8.18398	8.87347	8.82598	8.90446	8.99468	9.0356	8.98224	8.20101	8.24806	8.40363	8.73719	8.99616	9.00705	8.61437	8.76619	8.75226
sp|P07742|RIR1_MOUSE	21	C[+57.0214635]SNLC[+57.0214635]TEIVEYTSK;DDSIEGIYDTLK;DFSYNYFGFK;EDIDAAIETYNLLSEK;EYGPYETYEGSPVSK;GAFIDQSQSLNIHIAEPNYGK;GILQYDMWNVAPTDLWDWKPLK;HPDYAILAAR;IIDINYYPIPEAHLSNK;KSNQQNLGTIK;LNSAIIYDR;NTAAMVC[+57.0214635]SLENR;QIFETIYYGALEASC[+57.0214635]ELAK;SAGGIGVAVSC[+57.0214635]IR;SNQQNLGTIK;TRPAANPIQFTLNK;VAERPQHMLMR;VFSDVMEDLYNYINPHNGR;VLSGEFQIVNPHLLK;VSVGIHKEDIDAAIETYNLLSEK;YPFESPEAQLLNK		5.75618	5.66628	5.83399	5.30119	5.22103	5.19478	4.93991	4.9039	4.88045	5.708	5.66431	5.74949	5.19964	5.00852	5.09761	4.56048	4.25622	4.49807	5.73575	5.72559	5.79045	5.19787	5.27029	5.20429	4.90279	4.96801	5.00902
sp|Q99PL5|RRBP1_MOUSE	27	AENSQLTER;AMEALALAER;ASMVQSQEAPK;ASMVQSQEAPKQDAPAK;ASSPATSSQGK;DALNQATSQVESK;EQEIAAVQAR;ETSYEEALANQR;HMAAASAEC[+57.0214635]QNYAK;IPEHDLDPNVTIILK;LKELESQVSC[+57.0214635]LEK;LKGELESSDQVR;LLATEQEDAAVAK;LREAEETQNSLQAEC[+57.0214635]DQYR;LTAEFEEAQR;QLLLESQSQLDEAK;QLLLESQSQLDEAKSEAQK;SAILEATPK;SEMAPAQGQK;SIEALLEAGQAQDTQASHAEANQQQTR;SKC[+57.0214635]EELSSLHGQLK;TEATLEAEQTR;TLQEQLENGPNTQLAR;TLVSTVGSMVFSEGE…		4.35507	4.04405	4.02607	4.10931	3.97843	3.76127	3.7853	3.88848	3.9492	4.0755	4.42579	4.72898	4.10631	4.07833	4.33752	4.69631	4.77363	4.55466	4.16489	4.27432	4.11517	4.30283	3.78611	4.31624	4.0914	3.74924	4.04716
sp|Q8R4U7|LUZP1_MOUSE	9	ASNMGMGTDSGTQETK;EFALSNEHYSLSSK;EGVDQPVAVVMEDSSQHEALR;EKLEEEENLTR;LVNTTITPEPEPKPQPNSR;MVDLEKLEEALSR;NMEATNAYTQRPC[+57.0214635]TDFLELEQPR;NNDLQDNYLTELNR;VTSSITIYPSDSSGPR		1.25422	1.20476	1.27235	1.50623	0.908776	1.08145	1.07665	0.741917	1.071	1.12165	1.26882	1.55426	1.11675	1.03159	1.26879	1.43443	1.04388	0.983926	1.45808	1.52269	1.29731	1.34948	0.981918	1.61485	1.4893	0.727425	1.04827
sp|Q9D7S7-2|RL22L_MOUSE;sp|Q9D7S7|RL22L_MOUSE	3	FHLDLTHPVEDGIFDSGNFEQFLR;TGNLGNVVHIER;VVASDKETYELR		1.34328	0.988641	1.37699	-0.560947	-0.586675	-0.714257	-1.02398	-1.69938	-1.01408	1.32386	1.16024	1.80107	-0.667115	-0.744232	-0.95094	-1.15147	-2.52531	-2.34649	1.63704	0.878697	1.08489	-0.0722364	-0.940605	-2.21406	-1.29061	-0.703125	-0.166617
sp|Q9JIK5|DDX21_MOUSE	53	AAITVEHLAIK;AAVIGDVIR;APQVLVLAPTR;C[+57.0214635]SIEMPNISYAWK;DAQELSQNTC[+57.0214635]IK;DSEDNPQTLLFSATC[+57.0214635]PHWVFNVAK;DVESYIHR;EASGDAGEKSPR;EEYQLAQVEQK;EGAFSNFPISEETVK;EIITEEPSEEEADMPKPK;EIPVEQKEGAFSNFPISEETVK;ELKEQLGESIDAK;EQLGESIDAK;GAVEALAAALAHISGATSVDQR;GLDIPEVDLVVQSC[+57.0214635]PPK;GLDIPEVDLVVQSC[+57.0214635]PPKDVESYIHR;GVNFLFPIQAK;IGVPSATEIIK;IKDHLQNGK;KDAQELSQNTC[+57.0214635]IK;KDS…		8.51599	8.5528	8.55374	7.38225	7.38346	7.33266	6.41012	6.33839	6.39271	8.40499	8.47713	8.6559	7.43836	7.30575	7.31381	6.55061	6.67493	6.51934	8.42388	8.51677	8.50738	7.43198	7.56165	7.71062	6.53826	6.62125	6.53751
sp|P21981|TGM2_MOUSE	15	C[+57.0214635]DLEIQANGR;DLYLENPEIK;EYVLTQQGFIYQGSVK;GLLIEPAANSYLLAER;LAEKEETGVAMR;LTLYFEGR;LVVNFQC[+57.0214635]DK;NPLSDPLYDC[+57.0214635]IFTVEGAGLTK;SEGTYC[+57.0214635]C[+57.0214635]GPVSVR;SVEVSDPVPAGDLVK;VDLFPTDIGLHK;VGDSMSMGNDFDVFAHIGNDTSETR;VVSAMVNC[+57.0214635]NDDQGVLLGR;VVTNYNSAHDQNSNLLIEYFR;YSGC[+57.0214635]LTESNLIK		1.28361	1.05686	1.38686	2.82525	2.69294	2.70033	5.33679	5.67285	5.28357	1.18761	1.07788	1.17708	2.37103	2.16073	2.32519	4.86389	4.71782	4.84086	0.941026	1.039	1.13347	2.6955	2.92318	2.91838	4.78791	4.90538	4.7829
sp|Q9CXW4|RL11_MOUSE	10	AAKVLEQLTGQTPVFSK;GAKAEEILEK;ISKEEAMR;LC[+57.0214635]LNIC[+57.0214635]VGESGDR;LC[+57.0214635]LNIC[+57.0214635]VGESGDRLTR;NNFSDTGNFGFGIQEHIDLGIK;VLEQLTGQTPVFSK;VLEQLTGQTPVFSKAR;WFQQKYDGIILPGK;YDPSIGIYGLDFYVVLGRPGFSIADK		6.4075	6.38254	6.39424	5.55401	5.51846	5.73468	5.11847	5.02991	5.07202	6.41572	6.40911	6.44517	5.59415	5.45055	5.5522	5.28753	5.51066	5.0853	6.3775	6.4656	6.46236	5.55593	5.71977	5.81267	5.16699	5.1597	5.14924
sp|P11499|HS90B_MOUSE	38	ADHGEPIGRGTK;AKFENLC[+57.0214635]K;APFDLFENK;APFDLFENKK;AQALRDNSTMGYMMAK;C[+57.0214635]LELFSELAEDKENYK;DLVVLLFETALLSSGFSLEDPQTHSNR;DNSTMGYMMAK;DNSTMGYMMAKK;EEEDKEDEEKPK;EISDDEAEEEK;ELKIDIIPNPQER;GFEVVYMTEPIDEYC[+57.0214635]VQQLK;HLEINPDHPIVETLR;HSQFIGYPITLYLEK;HSQFIGYPITLYLEKER;IDIIPNPQER;IEDVGSDEEDDSGK;IEDVGSDEEDDSGKDK;KHLEINPDHPIVETLR;KHSQFIGYPITLYLEK;LGIHEDSTNR;LGIHEDSTNRR;LSELLRYHTSQSGDEMTSLS…		10.5984	10.6423	10.5929	9.72046	9.65908	9.68127	9.23335	9.27213	9.19709	10.6304	10.7121	10.8168	9.67224	9.53451	9.55903	9.36893	9.58663	9.29405	10.656	10.7119	10.5622	9.77967	9.84846	9.80581	9.17293	9.32439	9.34983
sp|Q6PDQ2|CHD4_MOUSE	61	AAYLNMSEDPSHPSMALNTR;AFSQFVRPLIAAK;APEPPPQQVAQQQ;AYHMVC[+57.0214635]LDPDMEK;AYHMVC[+57.0214635]LDPDMEKAPEGK;AYVSLFMR;C[+57.0214635]C[+57.0214635]NHPYLFPVAAMEAPK;EEEMGEEEEVER;EFEMWAPDMYVVTYVGDKDSR;EFSTNNPFK;EIIKQEESVDPDYWEK;ENEFSFEDNAIR;ERTEEPMETEAK;ESMAGNKPANAVLHK;FAEVEC[+57.0214635]LAESHQHLSK;FGTEELFKDEATDGGGDNK;FHNLEGFLEEFADIAK;FHNLEGFLEEFADIAKEDQIK;FMFNIADGGFTELHSLWQNEER;FNAPGAQQFC[+57.0214635…		6.50537	6.59838	6.63706	6.45734	6.27171	6.35851	5.97654	5.82974	5.91109	6.4964	6.53848	6.6163	6.41675	6.08084	6.01554	5.80344	6.04521	5.67446	6.52278	6.66289	6.59189	6.3337	6.30707	6.16326	5.71861	5.89368	6.07476
sp|Q9Z1X4-3|ILF3_MOUSE;sp|Q9Z1X4|ILF3_MOUSE	18	AVSDWIDEQEK;AYAALAALEK;EATDAIGHLDR;EDITQSAQHALR;EPPLSLTIHLTSPVVR;GDLDLELVLLC[+57.0214635]K;GNSELSEAENMDTPPDDESKEGAGEQK;HSSVYPTQEELEAVQNMVSHTER;LAAFGQLHK;LFPDTPLALEANK;LFPDTPLALEANKK;LNQLKPGLQYK;NTEHSMNYQYR;QQREDITQSAQHALR;SIGTANRPMGAGEALR;VLAGETLSVNDPPDVLDR;VLGMDPLPSK;VLQDMGLPTGAEGR		5.83688	5.75515	5.8431	5.42156	5.22918	5.28748	5.06488	5.19185	5.00436	5.70952	5.86331	6.04967	5.31176	5.24041	5.33478	5.01723	5.07227	4.9647	5.77656	5.87426	5.77661	5.29093	5.22796	5.63698	4.76223	4.99013	5.17718
sp|Q9R062|GLYG_MOUSE	2	MVVLTSPQVSDSMR;WEQGQADYMGADSFDNIKR		-1.97649	-1.86069	-1.61983	0.863803	0.846765	0.407093	1.58738	1.73285	1.39047	-1.80867	-1.57281	-1.43957	1.29395	1.00426	1.13807	1.48318	1.52034	1.31568	-1.8113	-2.29416	-1.94802	0.885807	0.995812	1.122	1.38777	1.47007	1.4736
sp|Q9QWR8|NAGAB_MOUSE	13	AQMALWTVLAAPLLMSTDLR;C[+57.0214635]NIDC[+57.0214635]VEDPK;C[+57.0214635]NIDC[+57.0214635]VEDPKNC[+57.0214635]ISER;FPHGIAFLADYAHSLGLK;INQDPLGIQGR;LDGC[+57.0214635]FSSSR;LGIYEDMGK;MTC[+57.0214635]MGYPGTTLDK;MTC[+57.0214635]MGYPGTTLDKVELDAETFAEWK;SVLSILDWFVR;TISPQNMDILQNPLMIK;TPPMGWLAWER;YLSNQASALVFFSR		0.148114	-0.312861	-0.297621	3.92557	3.78554	3.91037	6.14058	6.18166	6.08417	-0.10854	-0.57035	-0.10498	4.35414	4.07773	4.114	6.20679	6.46662	6.3804	-0.487947	-0.569583	-0.425223	3.76087	3.9025	3.76708	5.92758	6.0908	6.28026
sp|P38060|HMGCL_MOUSE	6	EVSVFGAVSELFTR;GASGNLATEDLVYMLNGLGIHTGVNLQK;GYVSC[+57.0214635]ALGC[+57.0214635]PYEGK;LLEAGDFIC[+57.0214635]QALNR;NANC[+57.0214635]SIEESFQR;WVPQMADHSDVLK		0.706965	0.595629	0.790204	0.830422	0.934427	0.869068	1.57197	1.12311	1.5008	0.679815	0.367539	0.0782644	1.23172	1.19462	1.16911	1.86353	1.35422	1.64297	0.486573	0.497747	0.777214	1.14035	1.28813	1.02267	1.44571	1.39494	1.48161
sp|Q60759|GCDH_MOUSE	6	DIVYEMGELGVLGPTIK;GELLGC[+57.0214635]FGLTEPNHGSDPGGMETR;GYGC[+57.0214635]AGVSSVAYGLLTR;HNPSNQSYTLSGTK;IQFGVPLAR;SMMSVQSSLVMHPIYTYGSEEQR		1.67194	1.59157	1.67686	1.69218	1.66651	1.65044	1.64166	1.514	1.41375	1.74451	1.64522	1.77839	1.87422	1.67786	1.79963	1.46949	1.65026	1.51564	1.70476	1.72247	1.67239	1.79724	1.92661	2.02427	1.54931	1.56239	1.58676
sp|P19137|LAMA1_MOUSE	109	AAGGSC[+57.0214635]QTC[+57.0214635]DC[+57.0214635]NPQGSVHSDC[+57.0214635]DR;AANAPRPGNWILER;ADNEVIC[+57.0214635]TSYYSK;AEGLSLQPYEEYFNVVR;AEIQLEGIAEQTENLQK;AEIQLEGIAEQTENLQKELTR;AEQHASELQSR;AFDLQGVFPHSC[+57.0214635]PGPEP;AKDC[+57.0214635]YYDSSVAK;ALC[+57.0214635]DGKWHTLQAHK;ALLHAPTGSYSDGQEHSISLVR;ANLKEFQEK;ASGQC[+57.0214635]VC[+57.0214635]KPGATGLHC[+57.0214635]EK;ASYGQGLQQSR;AYQPQTSSTNYNTLILNVK;C[+…		3.39597	3.03256	2.82038	8.02925	7.7519	7.73215	10.0056	10.3294	9.54718	3.47909	3.36841	3.36793	8.89327	8.60179	8.6697	10.5866	10.4618	11.3187	2.94976	2.56994	2.70139	7.87774	8.0736	7.93189	10.238	10.3507	9.57032
sp|P10126|EF1A1_MOUSE	18	DGSASGTTLLEALDC[+57.0214635]ILPPTRPTDKPLR;EHALLAYTLGVK;EHALLAYTLGVKQLIVGVNK;FEKEAAEMGK;FETSKYYVTIIDAPGHR;LPLQDVYKIGGIGTVPVGR;MDSTEPPYSQK;MDSTEPPYSQKR;NGQTREHALLAYTLGVK;NMITGTSQADC[+57.0214635]AVLIVAAGVGEFEAGISK;QLIVGVNKMDSTEPPYSQK;SGDAAIVDMVPGKPMC[+57.0214635]VESFSDYPPLGR;STTTGHLIYK;THINIVVIGHVDSGK;VETGVLKPGMVVTFAPVNVTTEVK;YEEIVKEVSTYIK;YYVTIIDAPGHR;YYVTIIDAPGHRDFIK		10.8939	10.7968	11.0773	10.4079	10.3783	10.4346	10.0516	10.0601	9.94177	10.9677	10.9255	10.9274	10.5067	10.2704	10.2092	10.3684	10.5541	10.4445	10.9601	11.0286	11.0951	10.3235	10.5691	10.4513	10.015	10.1179	10.0227
sp|Q64737|PUR2_MOUSE	46	AAGFKDPLLASGTDGVGTK;AFAHITGGGLLENIPR;AFTNPEDAC[+57.0214635]SFITSANFPALVVK;ATSRPGC[+57.0214635]SVDLGGFAGLFDLK;AVDGMQQEGAPYTGILYAGIMLTK;AVQEIMQEK;C[+57.0214635]FGPTAQAAQLESSK;C[+57.0214635]FGPTAQAAQLESSKK;DQAEQVLHDVR;DQAEQVLHDVRR;DSGVDIAAGNMLVK;DSGVDIAAGNMLVKK;EFMDRHEIPTAQWR;FGDPEC[+57.0214635]QVILPLLK;FGVDLDASTWR;GDTVATLSER;GLTYKDSGVDIAAGNMLVK;GVEITGFPEAQALGLQVFHAGTALK;GVEITGFPEAQALGLQVFHAGTALKDGK…		8.04251	8.13131	8.24425	6.63042	6.68605	6.54506	5.57699	5.61194	5.71633	7.99719	8.05149	8.00338	6.57567	6.43904	6.3365	5.4622	5.65498	5.48546	7.93128	8.04064	8.09862	6.49348	6.77639	6.55973	5.34916	5.78865	5.69925
sp|E9PVA8|GCN1_MOUSE	63	AALLETLSLLLGK;AASQGTQVPTVTEGVAAALLLSK;AIITALGVDR;ALADENEFVRDTALR;ALC[+57.0214635]DPLEEVR;ALQAAIQQLAEAQPEATAK;ASPDTPPERVDENGPELLPR;AVEDPGIRDTMLQALR;AVMSNLSAHGVK;AYSDQAIVNLLK;C[+57.0214635]MLDAALATLNAHGK;DAPNDASYDAVR;DAVLFFSESLVPTAR;DLAPYLPSVTPGLK;EDAGGMIQR;EEFSIMQTPAGELFDK;EGVLTGSPEQKEEAAK;ENVNSLLPVFEEFLK;FLLLASEDALC[+57.0214635]TVLR;FSSVQLLGDLLFHISGVTGK;GAAYGLAGLVK;GDTLLQALDFLPLLMQTVEK;GVTSILPVLR…		5.57915	5.71305	5.73984	5.38986	5.38953	5.45275	5.22105	5.1626	5.29695	5.72543	5.74308	5.769	5.25371	5.21945	5.20449	5.47199	5.47974	5.31959	5.71853	5.79788	5.82594	5.50391	5.41137	5.37703	5.34829	5.34852	5.46323
sp|Q8VHK9|DHX36_MOUSE	15	AESC[+57.0214635]GNGNSTGYQIR;ASLLDDYQLPEILR;DC[+57.0214635]AVLSAILDLIK;DYC[+57.0214635]WEYFLSSNTLQMLHNMK;ELVNLINNHQVTVISGETGC[+57.0214635]GK;FLIIPLHSLMPTVNQTQVFK;IESPHPVDWDDTK;LGGIAYFLSR;LSSVSHIVLDEIHER;NLQSDVLMTVIK;QEELTPLGVHLAR;SDGLVSIHPK;SDHLTVVNAFEGWEEAK;TTQVTQFILDNYIER;VQPGHC[+57.0214635]YHLYNGLR		3.41652	3.53952	3.58047	2.76862	2.80441	2.72839	2.70054	2.58052	2.52458	3.4059	3.29392	3.59002	2.8562	2.6448	2.42072	2.45797	2.43717	2.42182	3.32746	3.31529	3.43888	2.70032	2.78253	2.36244	2.43913	2.52349	2.64028
sp|Q9R0X0-2|MED20_MOUSE;sp|Q9R0X0|MED20_MOUSE	2	QGTFC[+57.0214635]VDC[+57.0214635]ETYHTAASTLGSQGQAGK;SLQQTVELLTK		-2.53187	-2.88621	-2.14402	-2.90558	-2.82238	-3.07698	-3.13429	-3.46397	-2.75596	-2.6851	-2.90925	-2.90229	-2.66149	-2.40519	-2.45417	-3.8072	-3.57695	-3.33143	-3.08065	-2.16279	-2.23691	-3.10285	-2.55625	-2.08412	-3.5087	-3.24723	-3.99482
sp|P26638|SYSC_MOUSE	19	DEWLRPEDLPIK;EIGNLLHPSVPISNDEDADNKVER;ELVSC[+57.0214635]SNC[+57.0214635]TDYQAR;EVMQEVAQLSQFDEELYK;EVMQEVAQLSQFDEELYKVIGK;FKDPGLVDQLVK;GYTPIYTPFFMR;IEQFVYSSPHDNK;IWGDC[+57.0214635]TVR;KLDLEAWFPGSGAFR;LDLEAWFPGSGAFR;LLIDEAIQK;LLIDEAIQKC[+57.0214635]DGER;MMDKVEFVHMLNATMC[+57.0214635]ATTR;SDDNSYDEK;TIC[+57.0214635]AILENYQAEK;VEFVHMLNATMC[+57.0214635]ATTR;YAGLSTC[+57.0214635]FR;YLIATSEQPIAALHR		5.6518	5.70518	5.7624	4.0147	3.97809	3.91279	4.19874	4.07797	4.24092	5.60899	5.51965	5.49696	4.16861	4.00737	4.1215	4.63187	4.61664	4.39254	5.33771	5.31835	5.47636	3.75669	3.8449	3.86983	4.0168	4.03986	3.9995
sp|Q8BVQ5|PPME1_MOUSE	4	GLSNLFLSC[+57.0214635]PIPK;NSEDLSAETMAK;QC[+57.0214635]EGITSPEGSK;SIVEGIIEEEEEDEEGSESVNKR		1.25788	1.15689	1.18166	1.51668	1.57178	1.32693	2.16509	2.20296	2.08641	1.24179	1.17503	1.10058	1.68346	1.42916	1.554	2.06778	2.22927	2.00601	1.06987	1.31614	1.19689	1.46346	1.63096	1.79612	2.03156	2.21169	2.27295
sp|Q8K019-2|BCLF1_MOUSE;sp|Q8K019|BCLF1_MOUSE	15	C[+57.0214635]DSADLRHDIDR;DTFEHDPSESIDEFNK;ETAYIVERPSTAK;EYKPYKDDSK;LKETAYIVERPSTAK;LLASTLVHSVK;MAPVPLDDSNRPASLTK;MIASDSHRPEVK;SPAVTLNER;SSFYPEGDQETAK;SSFYPEGDQETAKTGK;STSESFIQHIVSLVHHVK;TITPQNAPR;YFLHDDRDDGVDYWAK;YQGDGIVEDDEETMENNEEKK		4.64586	4.5705	4.66666	4.57627	4.45201	4.4031	4.22526	4.27553	4.20376	4.48268	4.64248	4.82291	4.62012	4.3661	4.45816	4.33131	4.60817	4.20922	4.75997	4.76616	4.66355	4.55272	4.45325	4.81197	4.0406	4.25094	4.38677
sp|Q60710|SAMH1_MOUSE	9	IAGSFLPFLDEDRLEDLGVSSLEER;ISNLIDIMITDAFLK;ISTAIDDMEAFTK;LTDNIFLEVLHSTDPQLSEAQSILR;MIEC[+57.0214635]IQQLSQSR;NGIDVDKWDYFAR;NYGLVPEEDITFIK;SFLYEIVSNKR;TWEPEDVC[+57.0214635]SFLENR		2.71251	2.73878	2.71629	2.5524	2.50675	2.31697	2.13897	2.35202	2.05721	2.64115	2.76108	2.73319	2.32996	2.35042	2.29919	2.03119	1.95167	1.95134	2.74368	2.69711	2.82276	2.80148	2.52035	2.10762	2.22616	2.39919	2.42193
sp|Q9D0I9|SYRC_MOUSE	30	AAQTSVAYGC[+57.0214635]IK;AAYPDLENPPLIVTPSQQPK;AWNLIC[+57.0214635]DVSR;DFVSEQLTSLLVNGVQLPVLGDKEK;DKVLTEEELK;FDADEEFK;FGDYQC[+57.0214635]NSAMGISQMLK;GFDILGIKPVQR;GFVQVDDGRK;GNTAAYLLYAFTR;IVFVPGC[+57.0214635]SVPLTIVK;IYDALDITLIER;LANIDEAMLQR;LFEFAGYDVLR;LMDLLEEGLK;LMDLLEEGLKR;LNDYIFSFDK;LNHVGDWGTQFGMLIAHLQDK;LQEVFGC[+57.0214635]AIR;MLLC[+57.0214635]EAVAAVMAK;NC[+57.0214635]GC[+57.0214635]LEASPSLEQL…		7.03924	7.16693	7.16306	6.0678	6.17446	6.08059	5.94314	5.93666	6.01827	7.08573	6.9783	6.95022	6.10065	5.98676	6.09019	6.00852	6.1558	5.9572	6.9848	7.01798	7.13436	5.99284	6.13043	6.06514	5.80644	5.85126	5.86625
sp|P20152|VIME_MOUSE	29	DGQVINETSQHHDDLE;DNLAEDIMR;EEAESTLQSFR;EEAESTLQSFRQDVDNASLAR;EMEENFALEAANYQDTIGR;ETNLESLPLVDTHSK;ETNLESLPLVDTHSKR;FADLSEAANR;ILLAELEQLK;ILLAELEQLKGQGK;ISLPLPTFSSLNLR;KVESLQEEIAFLK;LGDLYEEEMR;LLQDSVDFSLADAINTEFKNTR;LQDEIQNMK;LQDEIQNMKEEMAR;LQEEMLQR;LQEEMLQREEAESTLQSFR;NLQEAEEWYK;QDVDNASLAR;QQYESVAAK;QVDQLTNDK;QVDQLTNDKAR;QVQSLTC[+57.0214635]EVDALK;QVQSLTC[+57.0214635]EVDALKGTNESLER;RQVDQLTNDK;SLYS…		6.50779	6.46087	6.52633	6.16779	5.91962	5.92564	6.20956	6.36445	6.09965	6.17947	6.31932	6.58281	5.46851	5.37634	5.42859	6.11396	6.164	5.99775	6.05281	6.05828	6.19949	6.01778	5.92626	6.14818	5.77112	5.98797	6.2004
sp|P62737|ACTA_MOUSE	8	GILTLKYPIEHGIITNWDDMEK;GYSFVTTAER;IWHHSFYNELR;QEYDEAGPSIVHR;QEYDEAGPSIVHRK;VAPEEHPTLLTEAPLNPK;VAPEEHPTLLTEAPLNPKANR;YPIEHGIITNWDDMEK		9.14658	8.971	9.32847	9.42285	9.01717	9.44239	8.94086	9.10379	8.94278	9.1049	9.28291	9.42669	9.31878	9.10004	9.18748	9.5351	9.82283	9.70106	9.30776	9.4029	9.23871	9.32281	9.265	9.22826	9.26764	9.30597	8.95491
sp|Q9D819|IPYR_MOUSE	14	AAPFTLEYR;DVFHMVVEVPR;GISC[+57.0214635]MNTTVSESPFK;GISC[+57.0214635]MNTTVSESPFKC[+57.0214635]DPDAAK;GQYISPFHDVPIYADK;GYIWNYGAIPQTWEDPGHSDK;HTGC[+57.0214635]C[+57.0214635]GDNDPIDVC[+57.0214635]EIGSK;LKPGYLEATVDWFR;LKPGYLEATVDWFRR;NKDFAVDIIK;VIAINVDDPDAANYK;VIAINVDDPDAANYKDISDVER;VLGILAMIDEGETDWK;YVANLFPYK		6.60144	6.64365	6.61798	5.76351	5.55714	5.60258	5.26331	5.26985	5.17266	6.6194	6.61917	6.69211	5.66979	5.45437	5.45002	5.73409	5.87185	5.67924	6.77603	6.72321	6.7045	5.83373	5.69283	5.7608	5.40437	5.37204	5.30021
sp|P63037|DNJA1_MOUSE	18	C[+57.0214635]VLNEGMPIYR;EGGAGGGFGSPMDIFDMFFGGGGR;ELYDKGGEQAIK;ETTYYDVLGVKPNATQEELK;ETTYYDVLGVKPNATQEELKK;FKQISQAYEVLADSK;GAVEC[+57.0214635]C[+57.0214635]PNC[+57.0214635]R;HYNGEAYEDDEHHPR;IHQIGPGMVQQIQSVC[+57.0214635]MEC[+57.0214635]QGHGER;KGAVEC[+57.0214635]C[+57.0214635]PNC[+57.0214635]R;KILEVHIDK;NVIC[+57.0214635]DKC[+57.0214635]EGR;NVVHQLSVTLEDLYNGATR;NVVHQLSVTLEDLYNGATRK;QISQAYEVLADSK;TIVITS…		5.45405	5.40481	5.52425	4.33816	4.1887	4.21015	3.99486	4.10371	4.04774	5.38308	5.42627	5.42627	4.29878	4.15402	4.15884	3.9373	3.95607	3.93302	5.48431	5.53763	5.43797	4.3292	4.33693	4.30119	3.84201	4.1833	4.03839
sp|Q9R1P4|PSA1_MOUSE	13	ADEPMEH;AQPSQAAEEPAEK;AQPSQAAEEPAEKADEPMEH;AQSELAAHQK;AQSELAAHQKK;DLEFTIYDDDDVSPFLDGLEERPQR;ETLPAEQDLTTK;FVFDRPLPVSR;HMSEFMEC[+57.0214635]NLDELVK;IHQIEYAMEAVK;ILHVDNHIGISIAGLTADAR;NQYDNDVTVWSPQGR;QGSATVGLK		5.11298	5.15493	4.97663	5.01599	4.7743	5.03305	4.69384	4.90548	4.68289	5.09431	5.34741	5.4338	4.77168	4.80955	5.12958	4.90241	4.94601	4.84804	5.43424	5.28511	5.29908	5.27212	4.79841	5.0046	4.84948	4.74324	4.80946
sp|Q99P72|RTN4_MOUSE	9	DEAHVSDEFSK;EEYADFKPFEQAWEVK;ESLTEVSETVTQHK;LSTEPSPEFSNYSEIAK;NTYPKDEAHVSDEFSK;TMDIFNEMK;TSNPFLVAIHDSEADYVTTDNLSK;TSVVDLLYWR;VPLLLPNVSALESQIEMGNIVKPK		1.64176	1.47756	1.6563	1.01529	0.753157	0.790272	0.655262	0.707714	0.607828	1.53166	1.52435	1.93655	0.69715	0.627254	0.598637	-0.0181261	-0.0255681	-0.247142	1.69711	1.76125	1.52626	1.10156	0.885171	1.27044	0.426407	0.771081	1.03512
sp|Q8K2K6-1|AGFG1_MOUSE;sp|Q8K2K6-3|AGFG1_MOUSE;sp|Q8K2K6|AGFG1_MOUSE	6	APVGSVVSVPSHSSASSDK;C[+57.0214635]FDC[+57.0214635]DQR;QIWLGLFDDR;SLLGESAPALHLNK;SSAIPDFRDPQK;SSSADFGTFSTSQSHQTASTVSK		2.53523	2.46456	2.44161	2.15084	1.89343	2.04176	1.60411	1.80405	1.74612	2.5774	2.6341	2.72195	2.21745	2.05731	1.90287	2.52474	2.83546	2.57923	2.53814	2.7164	2.45419	2.03685	2.19557	2.05819	1.65251	1.99757	1.85101
sp|Q8VEK3-2|HNRPU_MOUSE;sp|Q8VEK3|HNRPU_MOUSE	25	AEVEGKDLPEHAVLK;APQC[+57.0214635]LGKFIEIAAR;DC[+57.0214635]EVVMMIGLPGAGK;EKPYFPIPEDC[+57.0214635]TFIQNVPLEDR;EKPYFPIPEDC[+57.0214635]TFIQNVPLEDRVR;GNFTLPEVAEC[+57.0214635]FDEITYVELQK;GYFEYIEENK;GYFEYIEENKYSR;HAAENPGKYNILGTNTIMDK;HLYTKDIDIHEVR;KDC[+57.0214635]EVVMMIGLPGAGK;KMC[+57.0214635]LFAGFQR;LLEQYKEESK;LQAALDNEAGGRPAMEPGNGSLDLGGDAAGR;LSASSLTMESFAFLWAGGR;MC[+57.0214635]LFAGFQR;NFILDQTNVSAAAQR;…		8.9451	8.90174	8.9349	8.62068	8.41766	8.33016	8.37934	8.27146	8.1862	8.92103	8.81958	8.87847	8.61229	8.41955	8.47649	8.43971	8.42334	8.25408	8.81397	8.86692	8.79507	8.46634	8.58177	8.70368	8.24717	8.27475	8.2304
sp|Q922R8|PDIA6_MOUSE	16	ALDLFSDNAPPPELLEIINEDIAK;ALDLFSDNAPPPELLEIINEDIAKK;DVVELTDDTFDK;GESPVDYDGGR;GSFSEQGINEFLR;GSTAPVGGGSFPTITPR;HQSLGGQYGVQGFPTIK;IFQKGESPVDYDGGR;KDVVELTDDTFDK;LAAVDATVNQVLASR;NLEPEWAAAATEVK;NLEPEWAAAATEVKEQTK;NSYLEVLLK;TC[+57.0214635]EEHQLC[+57.0214635]VVAVLPHILDTGAAGR;TGEAIVDAALSALR;VGAVNADKHQSLGGQYGVQGFPTIK		6.07221	6.14854	6.16898	6.90126	6.83372	6.90375	6.91443	7.01004	7.03276	6.18422	6.31602	6.59424	6.97624	7.0718	7.21907	8.01249	8.19694	8.10673	6.21666	6.25921	6.36301	7.1012	6.90933	7.21157	7.28327	6.98323	6.99198
sp|Q9D883|U2AF1_MOUSE	4	GGFC[+57.0214635]NFMHLKPISR;NPQNSSQSADGLR;WFNGQPIHAELSPVTDFR;YGEVEEMNVC[+57.0214635]DNLGDHLVGNVYVK		4.2395	4.16733	4.21853	3.71627	3.64098	3.51133	3.46027	3.49186	3.40147	4.17913	4.12272	4.01519	3.78902	3.67991	3.52445	3.57748	3.70997	3.38865	4.24241	4.24039	4.11619	3.57875	3.86299	3.43373	3.38283	3.61993	3.4699
sp|Q64511|TOP2B_MOUSE	19	AASNC[+57.0214635]GIVESILNWVK;ASGSENEGDYNPGR;DLIQMLVQR;EDLAAFVEELDKVEAQER;GFQQISFVNSIATTK;HSLEC[+57.0214635]TLILTEGDSAK;HVDYVVDQVVSK;LAQAEAAGLHK;LDKDIVALMTR;LLFPAVDDNLLK;LQTTLTC[+57.0214635]NSMVLFDHMGC[+57.0214635]LK;MLEGLDPHPMLPNYK;QTWMNNMMK;SLAVSGLGVIGR;SQDFGNLFSFPSYSQK;VSIDPESNIISIWNNGK;VYVPALIFGQLLTSSNYDDDEKK;YAGPEDDAAITLAFSK;YIFTMLSSLAR		1.81584	1.87896	2.00293	3.18641	3.31745	3.20451	3.798	3.87159	3.76086	2.15641	2.131	2.56274	3.33727	3.28418	3.15025	3.6021	3.6316	3.52423	2.15088	2.2314	2.16621	3.23693	3.38725	3.36581	3.40058	3.64584	3.9709
sp|P09405|NUCL_MOUSE	40	ALELTGLKVFGNEIK;ATFIKVPQNPHGKPK;EALNSC[+57.0214635]NKMEIEGR;EAMEDGEIDGNK;EAMEDGEIDGNKVTLDWAKPK;ETLEEVFEK;EVFEDAMEIR;FAISELFAKNDLAVVDVR;FGYVDFESAEDLEK;FGYVDFESAEDLEKALELTGLK;GFGFVDFNSEEDAK;GFGFVDFNSEEDAKAAK;GGGGDFKPQGK;GIAYIEFKSEADAEK;GLSEDTTEETLK;GLSEDTTEETLKESFEGSVR;GYAFIEFASFEDAK;GYAFIEFASFEDAKEALNSC[+57.0214635]NK;IVTDRETGSSK;KAAVPTPAK;KFGYVDFESAEDLEK;LELQGSNSR;NLEEKQGAEIDGR;NLSFNITEDELK;NLSFN…		10.0108	10.0206	9.88939	9.11624	8.79116	8.72873	8.29425	8.29892	8.15119	10.0184	10.1157	10.1678	9.12567	8.82001	8.8048	8.45008	8.51331	8.4757	10.2235	10.1813	10.0515	9.24009	9.0054	9.22879	8.33863	8.49578	8.43895
sp|O08788-2|DCTN1_MOUSE;sp|O08788|DCTN1_MOUSE	21	AFLQGGQEATDIALLLR;AKEEQQDDTVYMGK;DFEETMDALQADIDQLEAEKAELK;DLETSC[+57.0214635]SDTR;DSPLLLQQISAMR;ELTNQQEASVER;FTQSALDC[+57.0214635]MGVEVGR;GSDGAASSYQLK;IKGEELSEANVR;IQLEQVQEWK;KYFTC[+57.0214635]DEGHGIFVR;LHISQLQHENSILR;LNQLSTHTHVVDITR;LVLTQEQLHQLHSR;MQEQQADLQR;SLDFLIELLHK;VDELTTDLEILKAEIEEK;VEAAQETVADYQQTIK;VEAAQETVADYQQTIKK;YFTC[+57.0214635]DEGHGIFVR;YMEEMADTADAIEMATLDKEMAEER		1.6171	1.33998	1.54518	2.15799	1.65601	1.71207	2.27589	2.23019	2.13037	1.57987	1.68493	1.83319	2.07979	1.94888	1.96464	2.81153	2.68169	2.63147	1.65748	1.46107	1.45212	2.06037	1.7526	1.89675	2.27027	2.26904	2.31218
sp|Q91VR5|DDX1_MOUSE	30	ALIVEPSRELAEQTLNNVK;DLGLAFEIPAHIK;DNTRPGANSPEMWSEAIK;DQLSVLDNGVDIVVGTPGR;DQLSVLDNGVDIVVGTPGRLDDLVSTGK;EAQTSFLHLGYLPNQLFR;ELAEQTLNNVK;ELLIIGGVAAR;FLIC[+57.0214635]TDVAAR;FLVLDEADGLLSQGYSDFINR;FNFGEEEFK;GEDSVPDTVHHVVVPVNPK;GHQFSC[+57.0214635]VC[+57.0214635]LHGDR;GHVDVLAPTVQELAALEK;GSAFAIGSDGLC[+57.0214635]C[+57.0214635]QSR;HYYEVSC[+57.0214635]HDQGLC[+57.0214635]R;IDC[+57.0214635]DNLEQYFMQQGGGPDKK;I…		5.55861	5.57498	5.54531	5.01599	4.96695	4.7865	4.88136	4.79378	4.75849	5.42373	5.40403	5.35697	5.05261	4.91196	4.82066	4.90389	4.74671	4.79499	5.26997	5.32834	5.40582	4.88695	5.0384	4.84203	4.72283	4.86002	4.78899
sp|Q922L6|NELFD_MOUSE	7	ADSIFTEEGETPAWLEQMIAHTTWR;DYIMEPSIFNTLKR;FPVVAMGVLK;GHDASQITLALGTAASYPR;MFTSMDPPPVELIR;TSLATILDGGEENLEK;VPAFLDLFMQSLFKPGAK		1.24387	1.48182	1.75927	1.47649	1.49323	1.59612	1.41572	1.48651	1.43327	1.59739	1.3182	1.88173	1.40134	1.39207	1.32897	1.29031	1.44562	1.41805	1.54767	1.57807	1.73192	1.29503	1.45303	1.52146	1.11793	1.35102	1.50367
sp|P37040|NCPR_MOUSE	11	DGALTQLNVAFSR;EVGETLLYYGC[+57.0214635]R;IQTTAPPVKESSFVEK;KHPFPC[+57.0214635]PTTYR;LPFKPTTPVIMVGPGTGVAPFMGFIQER;NPFLAAVTTNR;QYELVVHEDMDTAK;TNVLYELAQYASEPSEQEHLHK;TYEHFNAMGK;VYVQHLLK;YYSIASSSK		1.51789	1.45417	1.56205	2.67959	2.55652	2.32667	2.78261	2.66773	2.66234	1.52274	1.49111	1.69916	2.76177	2.72657	2.73152	2.6021	2.49344	2.3021	1.70696	1.48348	1.73362	2.92684	2.96018	2.9991	2.78351	2.69821	2.74955
sp|Q62470|ITA3_MOUSE	12	AAFLSEQLQPLSR;C[+57.0214635]DSNLQMR;DWDLSEYSYR;EAVNPGSLFGYSVALHR;LGLPGLATFGYSLSGK;MDVDENLYPDLLVGSLSDHIVLLR;QLDPGGDQSSPPVTLAAAK;SETVLTC[+57.0214635]SNGR;TAEDVGSPLK;VDGWATLFLR;VLWSGLEDQRR;VYIYHSSSGGLLR		1.81952	1.87161	1.87608	3.5759	3.46334	3.46033	2.60535	2.59269	2.72354	1.93537	2.02028	2.13903	3.26651	3.06598	2.7554	1.96791	2.30749	1.89222	2.09079	2.26346	2.17044	3.40324	3.47073	3.19035	2.54319	2.89349	2.92573
sp|P35700|PRDX1_MOUSE	14	ATAVMPDGQFK;ATAVMPDGQFKDISLSEYK;GLFIIDDKGILR;HGEVC[+57.0214635]PAGWKPGSDTIKPDVNK;KLNC[+57.0214635]QVIGASVDSHFC[+57.0214635]HLAWINTPK;KQGGLGPMNIPLISDPK;LNC[+57.0214635]QVIGASVDSHFC[+57.0214635]HLAWINTPK;LNC[+57.0214635]QVIGASVDSHFC[+57.0214635]HLAWINTPKK;LVQAFQFTDK;QGGLGPMNIPLISDPK;QGGLGPMNIPLISDPKR;QITINDLPVGR;TIAQDYGVLK;TIAQDYGVLKADEGISFR		9.2479	9.24233	9.43469	8.93455	8.78128	8.98153	8.30108	8.40085	8.37418	9.15492	9.20725	9.43543	8.69647	8.61036	8.63219	8.03414	8.29648	8.0495	9.29165	9.49448	9.30054	8.8361	8.76455	9.05037	8.04724	8.40446	8.36193
sp|P63330|PP2AA_MOUSE	2	ELDQWIEQLNEC[+57.0214635]K;ELDQWIEQLNEC[+57.0214635]KQLSESQVK		1.38137	1.30123	1.69438	0.694913	1.23506	0.110749	0.757898	0.181161	0.77315	1.16877	0.376444	-0.146583	0.780685	0.927987	1.3643	0.678196	-0.522942	0.233263	0.475378	0.410108	1.25212	0.199943	0.907643	0.513625	0.51721	0.129719	-0.167896
sp|Q3TLH4-5|PRC2C_MOUSE	20	DAQQVEPEGQEKPSPAVVR;DQMEGSPNSSESFEHIAR;EANDENYGPGPSLRPPNVAC[+57.0214635]WR;EEQVVQVWSK;ETVEKPEEKPR;GLIPAGTQHSMMATTGK;HVDTNTQSAC[+57.0214635]FDVIDQK;IDNRPLEKPYIR;ISALESQPAR;LPDLSLVENK;LPSAQTSNGTDFVAAGK;MMWGSDPYHAEPQQAATPK;MNSVVYQK;QGPFPSKPPVPDNDEIWK;QQSEISAAVER;STTTSDPPNIC[+57.0214635]K;TVNQQSVAAPTVK;VKDAQQVEPEGQEKPSPAVVR;WLMMQSYMDPR;YATLSLFNTYK		3.71839	3.73932	3.76296	2.78771	2.55439	2.64033	2.1079	2.02236	2.04297	3.69639	3.78865	3.98465	2.5819	2.56316	2.60148	2.26351	2.50025	2.0604	3.72766	3.94871	3.75501	2.61738	2.57273	3.00029	1.87574	2.01645	2.25344
sp|P26231|CTNA1_MOUSE	26	AHVLAASVEQATENFLEK;AHVLAASVEQATENFLEKGDK;AIMAQLPQEQK;AIMAQLPQEQKAK;ALKPEVDKLNIMAAK;C[+57.0214635]VIALQEK;C[+57.0214635]VIALQEKDVDGLDR;EELVVAVEDVR;IAEQVASFQEEK;LAQENMDLFK;LIEVANLAC[+57.0214635]SISNNEEGVK;LLEPLVTQVTTLVNTNSK;LLILADMADVYK;MSASQLEALC[+57.0214635]PQVINAALALAAKPQSK;NAGNEQDLGIQYK;NLMNAVVQTVK;NTSDVISAAK;NVPILYTASQAC[+57.0214635]LQHPDVAAYK;QALQDLLSEYMGNAGR;QALQDLLSEYMGNAGRK;QIIVDPLSFSEER;S…		5.65998	5.64313	5.73573	4.95505	4.97016	4.96458	4.55202	4.66201	4.61833	5.47179	5.56029	5.67871	4.64691	4.69242	4.82078	4.3654	4.21951	4.19912	5.78822	5.76419	5.76589	5.20385	4.99617	5.24096	4.6846	4.60415	4.65836
sp|Q60973|RBBP7_MOUSE	8	DYALHWLVLGTHTSDEQNHLVVAR;EMFEDTVEER;GEFGGFGSVTGK;HPAKPDPSGEC[+57.0214635]NPDLR;IEC[+57.0214635]EIKINHEGEVNR;IGEEQSAEDAEDGPPELLFIHGGHTAK;VHIPNDDAQFDASHC[+57.0214635]DSDK;YMPQNPHIIATK		4.73076	4.52153	4.66313	4.76666	4.57319	4.61735	4.62008	4.59885	4.47119	4.61872	4.71026	4.8456	4.7318	4.60821	4.69331	4.70775	4.83406	4.78705	4.62296	4.66098	4.54341	4.61373	4.63905	4.99788	4.59799	4.52078	4.43539
sp|Q78PY7|SND1_MOUSE	37	ADDADEFGYSR;ALLLPGHHLVTVMLSGIK;ANNPEQNRLSEC[+57.0214635]EEQAK;DTNGENIAESLVAEGLATR;DTNGENIAESLVAEGLATRR;DTPDEPWAFPAR;EGLVMVEVR;ETC[+57.0214635]LITFLLAGIEC[+57.0214635]PR;ETDGSETPEPFAAEAK;EVC[+57.0214635]FTIENKTPQGR;EVEVEVESMDK;EYGMIYLGK;FVDGEWYR;GMWSEGNGSHTIR;KGMWSEGNGSHTIR;KVNVTVDYIRPASPATETVPAFSER;LEGDNIQDK;LRPLYDIPYMFEAR;LSEC[+57.0214635]EEQAK;NDISSHPPVEGSYAPR;NLPGLVQEGEPFSEEATLFTK;QFLPFLQR;RET…		6.35295	6.30976	6.37758	7.11549	6.90238	6.95132	6.87832	6.92518	6.86172	6.32112	6.39923	6.48987	7.16166	6.93332	6.84394	7.23606	7.42222	7.3295	6.33083	6.44074	6.31828	7.08862	7.01172	6.88289	6.9704	7.02557	7.03575
sp|Q8BMA6|SRP68_MOUSE	12	ALLQQQPEDDSKR;C[+57.0214635]SLQAAAILDANDSHQTDTSSQVK;DLPDVQELITQVR;EFGDSLSLEILQIIK;FESFC[+57.0214635]LDPSLVTK;IFLLGLADNEAAIVQAESEETKER;LASAFTEEQAVLYNQR;LEALITQTR;LEAQAYTAYLSGMLR;SGGTEGLLAEKLEALITQTR;TKLEAQAYTAYLSGMLR;YANEVSSHGGASK		1.87503	1.72073	1.67215	1.27133	1.23955	1.16536	1.26266	1.55469	1.58144	1.89744	2.08919	2.30211	1.1601	1.51259	1.58922	1.87434	1.58644	1.98935	2.13585	1.81843	1.95034	1.66646	1.14434	1.18941	1.79766	1.5471	1.58278
sp|P61358|RL27_MOUSE	5	DVFRDPALK;NIDDGTSDRPYSHALVAGIDR;NIDDGTSDRPYSHALVAGIDRYPR;VYNYNHLMPTR;YSVDIPLDKTVVNK		4.26124	3.78565	3.96885	2.99208	3.18292	2.951	3.30673	2.85666	3.17445	4.03714	4.12944	4.69608	2.80229	3.41165	3.76378	3.37461	2.26691	3.11649	4.48893	3.97985	4.14883	3.29476	2.87636	3.48303	3.45444	2.85006	3.10423
sp|Q9Z1Z0|USO1_MOUSE	23	C[+57.0214635]QNEQLQTAVTQQASQIQQHK;EQDLQLEELK;EQDLQLEELKQQVSTLK;GVMGGQSAGPQHTEAETIQK;IVAFENAFER;LMDLLADSR;LQTENC[+57.0214635]ELLQR;LSALLQETK;MKPWFEVGEENSGWSAQK;NDGVLLLQALTR;QLDSSNSTIAILQTEK;QSEDLGSQFTEIFIK;SQLC[+57.0214635]SQSLEITR;SQQALLQGQLAEK;SQQALLQGQLAEKDSLIENLK;SSQASGMSEQASATC[+57.0214635]PPR;SSQASGMSEQASATC[+57.0214635]PPRDPEQVAELK;SVPVEGESEHVSAAK;TLEQHDNIVTHYK;TNNSNQNFFK;VASSTLLDDR;VLVSPT…		4.39049	4.40589	4.47162	4.58073	4.49438	4.51647	4.53653	4.62563	4.61583	4.50559	4.4985	4.62705	4.69142	4.58461	4.67014	5.22006	5.23068	5.25122	4.59002	4.67257	4.65308	4.58818	4.54944	4.68046	4.72518	4.62883	4.60111
sp|P06801|MAOX_MOUSE	15	AEC[+57.0214635]SAEQC[+57.0214635]YK;AIFASGSPFDPVTLPDGR;AIVVTDGER;DLAFTLEER;DMAAFNERPIIFALSNPTSK;GPEYDAFLDEFMEAASSK;HIDDKVFLTTAEVISQQVSDK;IKPTALIGVAAIGGAFTEQILK;ILGLGDLGC[+57.0214635]NGMGIPVGK;LFYSVLMSDVEK;LSDQTVLFQGAGEAALGIAHLVVMAMEK;MATVYPEPQNK;VFLTTAEVISQQVSDK;YGMNC[+57.0214635]LIQFEDFANR;YLLLMDLQDR		0.998338	0.802412	0.82436	2.55016	2.57867	2.58544	3.47319	3.45152	3.54425	0.713157	0.847988	0.641166	3.5867	3.44273	3.42428	5.42027	5.46026	5.50884	0.839247	1.14455	0.875507	2.7051	2.6899	2.4977	4.09811	3.86648	3.61244
sp|P20029|BIP_MOUSE	40	AKFEELNMDLFR;ALSSQHQAR;AVEEKIEWLESHQDADIEDFK;DAGTIAGLNVMR;DNHLLGTFDLTGIPPAPR;EFFNGKEPSR;ELEEIVQPIISK;ETAEAYLGKK;FEELNMDLFR;IDTRNELESYAYSLK;IEIESFFEGEDFSETLTR;IEWLESHQDADIEDFK;IEWLESHQDADIEDFKAK;IINEPTAAAIAYGLDKR;ITITNDQNR;ITITNDQNRLTPEEIER;ITPSYVAFTPEGER;ITPSYVAFTPEGERLIGDAAK;KSDIDEIVLVGGSTR;KSQIFSTASDNQPTVTIK;KTKPYIQVDIGGGQTK;LIGDAAKNQLTSNPENTVFDAK;MKETAEAYLGK;MVNDAEKFAEEDK;NELESYAYSLK;NGRVEIIAN…		8.41556	8.33553	8.46727	8.74794	8.63824	8.68533	8.82538	8.78435	8.71492	8.43474	8.47722	8.80506	8.94408	8.8632	8.965	9.59227	9.93941	9.58183	8.47041	8.53251	8.49856	8.82324	8.95013	9.09892	8.9963	8.85987	8.82937
sp|P40336-2|VP26A_MOUSE;sp|P40336|VP26A_MOUSE	9	EITGIGPSTTTETETIAK;EYDLIVHQLATYPDVNNSIK;HYLFYDGESVSGK;LFLAGYDPTPTMR;SNTHEFVNLVK;SYDFEFMQVEKPYESYIGANVR;YEIMDGAPVK;YEIMDGAPVKGESIPIR;YFLNLVLVDEEDRR		2.35237	2.42895	2.50611	2.85968	2.84539	3.00507	3.56046	3.6811	3.50065	2.46474	2.37508	2.62741	3.03673	3.05	3.29702	4.02526	4.11667	4.1373	2.08491	2.31391	2.25754	2.7412	2.79193	3.02548	3.62909	3.45305	3.47293
sp|Q3U1J4|DDB1_MOUSE	44	ALVSEWKEPQGK;ALYYLQIHPQELR;DLLFILTAK;DPNTYFIVGTAMVYPEEAEPK;DSAATTDEER;EATADDLIKVVEELTR;EEQMDGTVTLK;EMLGGEIIPR;ETDDTLVLSFVGQTR;GAVYSMVEFNGK;GDFILVGDLMR;IAVMELFRPK;IC[+57.0214635]YQEVSQC[+57.0214635]FGVLSSR;IEVQDSSGGTTALRPSASTQALSSSVSSSK;IVVFQYSDGK;KIC[+57.0214635]YQEVSQC[+57.0214635]FGVLSSR;KTEPATGFIDGDLIESFLDISRPK;LEELHVIDVK;LEIYVVTAEGLRPVK;LFMLLLEK;LFMLLLEKEEQMDGTVTLK;LGKDPNTYFIVGTAMVYPEEAEPK;LL…		7.18157	7.22164	7.29088	7.58469	7.55226	7.58072	6.87373	6.92406	6.85028	7.20181	7.22343	7.32121	7.62213	7.34518	7.29935	6.81895	6.93168	6.96674	7.19225	7.24701	7.19113	7.51754	7.59645	7.44654	6.58857	6.8153	6.85842
sp|P09803|CADH1_MOUSE	7	DNVYYYDEEGGGEEDQDFDLSQLHR;DQVTTLDVHVC[+57.0214635]DC[+57.0214635]EGTVNNC[+57.0214635]MK;DTGVISVLTSGLDR;DWVIPPISC[+57.0214635]PENEKGEFPK;KDLEIGEYK;VFYSITGQGADKPPVGVFIIER;VTDDDAPNTPAWK		2.02708	1.76242	2.00826	3.31887	3.02731	2.90557	2.60274	2.7438	2.52271	1.73071	1.65384	2.03896	2.9694	2.88722	2.74643	1.96838	1.83074	1.87783	1.91019	1.8686	1.8046	3.44067	3.17327	3.3092	2.81289	2.97836	2.92661
sp|Q80YR5|SAFB2_MOUSE	5	C[+57.0214635]YGFVTMSTSDEATK;EYVAAQLGQLPAQLLK;HAVDEEVFK;MEEEGSEDNGLEEDSR;VTLADEEAPMEPENEK		0.435874	-0.100139	0.185643	-0.727224	-1.18335	-1.24476	-0.644544	-0.748623	-0.744697	-0.0163543	0.226899	0.460237	-1.1031	-0.74318	-0.546511	-0.669158	-1.2925	-0.882617	0.430086	0.191661	0.138745	-1.03025	-1.21383	-0.268191	-0.772902	-1.03577	-1.10785
sp|Q91WJ8|FUBP1_MOUSE	20	C[+57.0214635]QHAAEIITDLLR;EMVLELIR;GTPQQIDYAR;IAQITGPPDR;IGGDAGTSLNSNDYGYGGQK;IGGNEGIDVPIPR;IQFKPDDGTTPDR;IQIAPDSGGLPER;IQQESGC[+57.0214635]KIQIAPDSGGLPER;LLDQIVEK;MGQAVPAPAGAPPGGQPDYSAAWAEYYR;MVMIQDGPQNTGADKPLR;RPLEDGDQPDAK;SC[+57.0214635]MLTGTPESVQSAK;SC[+57.0214635]MLTGTPESVQSAKR;SPPPNADPNMK;SPPPNADPNMKLFTIR;SVMTEEYKVPDGMVGFIIGR;SVQAGNPGGPGPGGR;VPDGMVGFIIGR		6.69892	6.71661	6.71242	6.20385	6.01268	6.00971	5.58963	5.69156	5.53033	6.55902	6.65201	6.76428	5.92153	5.74508	5.72107	5.46191	5.60327	5.15892	6.64726	6.69994	6.60994	6.04151	6.02161	6.16986	5.33045	5.72891	5.81668
sp|Q8VDL4-3|ADPGK_MOUSE;sp|Q8VDL4|ADPGK_MOUSE	10	APQEFTTSHLESGSR;EGITFHFTPVLVC[+57.0214635]K;IVLNPDKPVVEWHR;LAAAWDALIAQPAR;LGPAPVPVGPLSPESR;LLEVVTAISDIPTGIPVHLELASMTNR;LLQALGLSPGSGK;SDLEEAFLYFMGK;VAGTQAC[+57.0214635]ATETIDTNR;VLLC[+57.0214635]GPIGPK		3.03995	3.01425	3.23841	2.01201	2.3102	2.23996	2.27107	2.15966	2.35852	3.06773	3.01759	3.04512	2.34288	2.25238	2.50464	2.50199	2.56269	2.47145	2.90219	3.12177	3.21342	2.35352	2.67428	2.61913	2.41715	2.46648	2.33519
sp|P70398|USP9X_MOUSE	57	AIDLLKEIYTNLGPR;ALTLQDLDNIWAAQAGK;AQENYEGGEEVSPPQTK;ASYDTLC[+57.0214635]VLDGDKDSINC[+57.0214635]AR;C[+57.0214635]LAENAVYLC[+57.0214635]DR;DDVFGYPQQFEDKPPLSK;DGQLWLC[+57.0214635]APQAK;DNEDYDPQTVR;DSLHQPQYVEK;ELDMEPYTVAGVAK;ELIDDFIFPASNVYLQYMR;EYINEC[+57.0214635]DSDYHEER;FDDGDVTEC[+57.0214635]K;FGTLNGFQILHDR;FLFTTGFHTK;FNDYFEFPR;FSEYLLEC[+57.0214635]PSAEVR;GDLLEGANAYHC[+57.0214635]EK;GELEVLLEAAIDLS…		5.33215	5.44914	5.53301	5.07991	5.05834	5.04343	4.97882	4.87686	5.04656	5.49757	5.46977	5.44653	5.13885	4.85103	4.96905	4.97683	4.9318	4.91725	5.53737	5.54308	5.61101	5.03461	5.10964	4.94618	4.87656	4.91096	5.02
sp|Q9QZQ1-2|AFAD_MOUSE	29	EELSSGDSLSPDPWK;EIILDDDEC[+57.0214635]PLQIFR;ENAELAQPLR;ESSEDSFLSAIINYTNSSTVHFK;FVDPIQDHVLSK;IDDVLHTLTGAMSLLR;ISETTMLQSGMR;ITLDAQDVLAHLVQMAFK;IVQATTLLTMDK;KEPEIITVTLK;LAAEVYKDMPETSFTR;LAAGDQLLSVDGR;LDLFEISQPTEDLEFHGVMR;LDQEQEYR;LFSQGQDVSDK;LLEPEEPGLSRPPLPR;LPYLVELSPDGSDSR;LVTDPDSGLC[+57.0214635]SHYWGAIIR;MVSMMEGVIQK;QGLELAADC[+57.0214635]HLSR;QQLGHIEAWAEK;SMDAETYVDGQR;SPGTWTIYFEGADYESHLMR;SQDADLP…		3.43677	3.42624	3.57994	3.67177	3.41769	3.51552	3.00913	3.1998	3.05634	3.34266	3.43787	3.64608	3.40125	3.32406	3.35724	3.13063	3.17097	3.03748	3.6706	3.78307	3.66481	3.61716	3.60714	3.76731	3.15623	3.34901	3.3524
sp|Q8C7Q4|RBM4_MOUSE	2	ATGPVLTVGEGYGYGHDSELSQASAAAR;VADLTEQYNEQYGAVR		-1.67166	-1.84915	-1.61433	-1.81732	-1.74396	-1.67676	-1.83965	-1.5144	-1.74457	-1.891	-1.71214	-1.4927	-1.75842	-1.64693	-1.39637	-1.23718	-1.02855	-1.33943	-1.96325	-1.8236	-1.78714	-1.71996	-1.51229	-1.23638	-1.61386	-1.46217	-1.57226
sp|Q91VX2|UBAP2_MOUSE	13	DGNLANNPYSGDVTK;ESTAGDGPSTVSR;GGYGGSSQAPNK;GVSVSSGTGLPDMTGSVYNK;IAYQSSASPPDSAPGSVANGHGGGR;LAQVIFDKNDSDFEAK;LLQLPNMTVENIVSAHQPQPK;NQDEC[+57.0214635]IVALHDC[+57.0214635]NGDVNK;QVVQATAEQMR;SHSMSQEPPSK;SQASKPTYGSAPYWTN;SQHTVDTTSSVPAPK;SQPEPSPVLSQLSQR		4.55939	4.48071	4.73508	3.02969	2.76969	2.94883	1.94274	2.01486	1.74624	4.51412	4.58701	4.96993	2.90556	2.76172	2.88207	2.39344	2.62358	1.9048	4.63031	4.80389	4.68895	3.01666	2.99985	3.48042	1.80809	2.04245	2.1738
sp|Q3UFY7-4|5NT3B_MOUSE;sp|Q3UFY7|5NT3B_MOUSE	5	C[+57.0214635]PSSHNILDNSK;IGFLNDKVEER;VQIAQVVGESTAMLR;YMDSYDIVLEK;YMDSYDIVLEKDETLDVVNGLLR		0.304858	0.491124	0.524926	0.648882	0.585682	0.612736	0.740185	0.661778	0.659064	0.41512	0.370635	0.6519	0.680805	0.657187	0.520118	0.751613	1.04182	0.991884	0.287734	0.627382	0.645497	0.513442	0.602592	0.719279	0.698706	0.81926	0.949154
sp|P00920|CAH2_MOUSE	12	AVQQPDGLAVLGIFLK;AVQQPDGLAVLGIFLKIGPASQGLQK;DFPIANGDR;EPITVSSEQMSHFR;HNGPENWHK;IGPASQGLQK;LIQFHFHWGSSDGQGSEHTVNK;QSPVDIDTATAQHDPALQPLLISYDK;SIVNNGHSFNVEFDDSQDNAVLK;TLNFNEEGDAEEAMVDNWRPAQPLK;VLEALHSIK;YAAELHLVHWNTK		2.258	2.12907	1.9572	4.43249	4.24466	4.31559	6.13396	6.20093	5.91506	2.38537	2.38783	2.48522	4.93176	4.78934	4.80418	6.92915	7.18702	7.13216	3.70597	3.75067	3.74846	4.82702	4.77349	4.7908	6.16189	5.78133	5.8071
sp|Q99LF4|RTCB_MOUSE	20	EGYAWAEDKEHC[+57.0214635]EEYGR;EQLAQAMFDHIPVGVGSK;GGGVGGFLPAMK;GLGHQVATDALVAMEK;GMAAAGNYAWVNR;GQVC[+57.0214635]VMIHSGSR;IASPEGQDYLK;IASPEGQDYLKGMAAAGNYAWVNR;LADMGIAIR;LVMEEAPESYK;MLQADPNKVSPR;NLDFQDVLDK;NLDFQDVLDKLADMGIAIR;NVTDVVNTC[+57.0214635]HDAGISK;NVTDVVNTC[+57.0214635]HDAGISKK;NYNDELQFLDK;QIGNVAALPGIVHR;TNLDESDVQPVK;VEQHVVDGK;VFNTTPDDLDLHVIYDVSHNIAK		5.43115	5.27669	5.34416	5.20012	5.01081	4.98743	5.01508	5.04875	4.89317	5.27445	5.33819	5.6418	5.17033	5.01297	5.10826	5.07534	5.08794	5.03168	5.33551	5.3315	5.23661	5.1466	5.13504	5.38659	4.96746	5.01135	5.03201
sp|P50136|ODBA_MOUSE	10	AVAENQPFLIEAMTYR;ISFYMTNYGEEGTHVGSAAALER;NNGYAISTPTSEQYR;QGQIINPSEDPHLPQEEVLK;QYLLNQGWWDEEQEK;SVDEVNYWDK;SVDEVNYWDKQDHPISR;TDLVFGQYR;VDGNDVFAVYNATK;VMEAFEQAER		2.97804	2.85626	2.93561	2.67527	2.56107	2.66242	2.37446	2.33674	2.20334	3.07344	3.05633	3.31981	2.74352	2.529	2.65254	2.12564	2.36733	2.21895	3.30072	3.42159	3.26114	2.85738	2.90677	3.08531	2.3581	2.47137	2.4518
sp|Q01853|TERA_MOUSE	47	AHVIVMAATNRPNSIDPALR;AIANEC[+57.0214635]QANFISIK;AVANETGAFFFLINGPEIMSK;DVDLEFLAK;EAVC[+57.0214635]IVLSDDTC[+57.0214635]SDEK;EAVC[+57.0214635]IVLSDDTC[+57.0214635]SDEKIR;EDEEESLNEVGYDDIGGC[+57.0214635]RK;ELQELVQYPVEHPDK;ELQELVQYPVEHPDKFLK;EMVELPLRHPALFK;ERQTNPSAMEVEEDDPVPEIR;ESIESEIR;ETVVEVPQVTWEDIGGLEDVKR;EVDIGIPDATGR;EVDIGIPDATGRLEILQIHTK;GDDLSTAILK;GGNIGDGGGAADR;GGNIGDGGGAADRVINQILTEMDGMSTK;GIL…		8.3265	8.28061	8.35033	8.55095	8.35704	8.3939	8.46178	8.56081	8.43411	8.31047	8.34327	8.48364	8.47353	8.43763	8.55147	8.81218	8.78178	8.80023	8.39605	8.38355	8.39318	8.54169	8.37484	8.63249	8.4691	8.43259	8.49533
sp|Q9CXY6|ILF2_MOUSE	14	AQDPSEVLTMLTNETGFEISSSDATVK;AYEKPPEKK;GTMTTGHNVADLVVILK;ILITTVPPNLR;ILPTLEAVAALGNK;ILPTLEAVAALGNKVVESLR;INNVIDNLIVAPGTFEVQIEEVR;NQDLAPNSAEQASILSLVTK;QPLALNVAYR;VHTVMTLEQQDMVC[+57.0214635]YTAQTLVR;VKPAPDETSFSEALLK;VKPAPDETSFSEALLKR;VLQSALAAIR;WFEENASQSTVK		5.55694	5.68273	5.83378	5.42075	5.40003	5.45543	4.96715	5.29314	5.12951	5.73659	5.75991	5.89035	5.38767	5.21757	5.28872	4.91107	5.15344	4.87646	5.63478	5.70518	5.71978	5.27999	5.32298	5.58044	4.66122	5.13409	5.10151
sp|P52480|KPYM_MOUSE	4	C[+57.0214635]C[+57.0214635]SGAIIVLTK;EAEAAIYHLQLFEELR;EAEAAIYHLQLFEELRR;LAPITSDPTEAAAVGAVEASFK		7.13513	7.3797	7.60079	6.40495	6.3671	6.11823	5.22345	5.38695	5.76487	7.03971	7.18702	7.2216	6.37699	6.2281	6.03943	5.45904	5.81206	5.85449	7.08242	7.24993	7.4032	6.31104	6.46787	6.33429	5.04983	5.77302	5.68319
sp|Q9CR68|UCRI_MOUSE	6	AEVLDSTK;EIDQEAAVEVSQLR;EIDQEAAVEVSQLRDPQHDLDR;NVVSQFVSSMSASADVLAMSK;RAEVLDSTK;VPDFSDYR		3.63934	3.50935	3.44852	3.69298	3.43339	3.36255	3.68588	3.86677	3.73107	3.62665	3.77687	3.96872	3.86359	3.66172	3.85783	3.72658	3.46013	3.79171	3.92533	3.9153	3.75176	3.96251	3.76275	4.14459	4.04262	3.97738	3.79029
sp|Q9QUR6|PPCE_MOUSE	26	DETSVQEYHGHK;DSEIFYQFTSFLSPGVIYHC[+57.0214635]DLTK;DVLEWVAC[+57.0214635]VR;EELEPMVFR;FIATLQYIVGR;FTC[+57.0214635]MAWTHDGK;FTIGHAWTTDYGC[+57.0214635]SDTK;GGGEYGETWHK;GIDAADYQTIQIFYPSK;GMFYNSYPQQDGK;HMGGVLAVANIR;ITVPFLEQC[+57.0214635]PIR;LINIDFTDPDESK;LINIDFTDPDESKWK;LPEADDIQYPSMLLLTADHDDR;NILQLHDLTTGALLK;QSNPLLIHVDTK;SDGTETSTNLHQK;SNFLVLC[+57.0214635]YLHDVK;VFLDPNTLSDDGTVALR;VIEEVSDMFAFIAR;VLVPEHE…		4.83844	4.74695	4.85839	5.22936	5.15204	5.12619	5.09814	5.07867	5.00279	4.91731	4.8243	4.8142	5.16977	4.97442	4.95687	4.96468	4.74149	5.00331	4.69005	4.71842	4.83943	5.17364	5.26574	5.19807	4.96049	5.13261	5.18749
sp|Q80TP3|UBR5_MOUSE	22	AMNQQTTLDTPQLER;C[+57.0214635]TADILLLDTLLGTLVK;EGEEQSLLAEEADSSKPGPSAPDVAAQLK;FTC[+57.0214635]IGALYSELLAVSSK;GDFLNYALSLMR;LEHTAQTYSELQGER;LLTATNLVTLPNSR;LSLELFGR;MLVVAEQPLHAMR;NAQNPSLHHPR;NSLEDLTAEDFR;QC[+57.0214635]VVGPNHAAFLLEDGR;SMIMFGSQENKDPLSASSR;SVVDMDLEDTDDGDDNAPLFYQPGKR;TC[+57.0214635]GLLESLC[+57.0214635]C[+57.0214635]C[+57.0214635]TEC[+57.0214635]AR;TSDSPWFLSGSETLGR;TSPTAYC[+57.0214635]DC…		2.55749	2.56823	2.54098	1.69557	1.67197	1.63143	1.05123	0.921892	1.0329	2.44714	2.34661	2.31496	1.6789	1.46419	1.31668	0.940967	1.00207	0.810684	2.27594	2.30069	2.48144	1.51652	1.64826	1.35465	0.892933	0.896299	0.897834
sp|Q9EP72|EMC7_MOUSE	3	AVVPGVKPQDWISAAR;EMEQSMNMLNSNHELPDVSEFMTR;VVNTSDPDMR		-0.962529	-1.04604	-0.6335	-0.472791	-0.195588	-0.129361	0.0461613	0.052168	0.158862	-1.10082	-1.2119	-0.443776	-0.21757	-0.25099	-0.0436876	0.455615	0.938326	0.688023	-0.782051	-0.722551	-0.592988	-0.238414	-0.149104	0.107391	0.169559	-0.0467354	-0.0454721
sp|Q62167|DDX3X_MOUSE	11	DSSGWSSSK;GADSLEDFLYHEGYAC[+57.0214635]TSIHGDR;GFYDKDSSGWSSSK;KGADSLEDFLYHEGYAC[+57.0214635]TSIHGDR;NINITKDLLDLLVEAK;QEVPSWLENMAFEHHYK;QSSGASSSSFSSSR;SPILVATAVAAR;TAAFLLPILSQIYADGPGEALR;VRPC[+57.0214635]VVYGGAEIGQQIR;VVWVEEIDKR		5.96786	6.18503	6.14325	5.48387	5.49921	5.40454	4.97144	5.14638	5.0363	6.04387	6.14904	6.14712	5.64513	5.5277	5.30743	5.29462	5.44697	5.18274	6.06645	6.16456	6.1626	5.42346	5.70015	5.30994	4.88226	5.28201	5.19329
sp|P17182|ENOA_MOUSE	34	AAVPSGASTGIYEALELRDNDK;AGAVEKGVPLYR;AGYTDQVVIGMDVAASEFYR;DATNVGDEGGFAPNILENK;DATNVGDEGGFAPNILENKEALELLK;EIFDSRGNPTVEVDLYTAK;FGANAILGVSLAVC[+57.0214635]KAGAVEK;FMGKGVSQAVEHINK;FTASAGIQVVGDDLTVTNPK;FTASAGIQVVGDDLTVTNPKR;GNPTVEVDLYTAK;GNPTVEVDLYTAKGLFR;GVSQAVEHINK;GVSQAVEHINKTIAPALVSK;IDKLMIEMDGTENK;IEEELGSKAK;IGAEVYHNLK;IGAEVYHNLKNVIK;KVNVVEQEK;LAMQEFMILPVGASSFR;LAMQEFMILPVGASSFREAMR;LMIEMDGTENK;LM…		10.2578	10.2762	10.3652	9.52206	9.41152	9.33737	8.80622	8.68476	8.75951	10.1437	10.1112	10.2347	9.45168	9.37453	9.36068	9.10321	9.13625	8.87076	10.1422	10.1515	10.2617	9.42894	9.44688	9.52395	8.65225	8.78267	8.8529
sp|P50096|IMDH1_MOUSE	8	FEQGFITDPVVLSPSHTVGDVLEAK;FGVPVIADGGIQTVGHVVK;FVPYLIAGIQHGC[+57.0214635]QDIGAQSLSVLR;GKLPIVNDQDELVAIIAR;IQHGFSGIPITATGTMGSK;LPIVNDQDELVAIIAR;TMSAQIEGGVHGLHSYEK;VGMGC[+57.0214635]GSIC[+57.0214635]ITQEVMAC[+57.0214635]GRPQGTAVYK		3.07013	2.86359	3.14199	1.45128	1.1822	1.08607	1.06617	1.04175	1.10546	3.15613	3.00605	3.23783	1.3421	1.29916	0.756816	1.05276	0.606016	1.45042	3.09428	3.18379	3.00286	1.41905	1.16507	0.456548	1.03617	1.29945	1.10585
sp|Q91V92|ACLY_MOUSE	37	AFDSGIIPMEFVNK;AGKDLVSSLTSGLLTIGDR;AISEQTGKELLYK;AVQGMLDFDYVC[+57.0214635]SR;DEPSVAAMVYPFTGDHK;DGVYILDLAAK;DLVSSLTSGLLTIGDR;EAGVFVPR;EAYPEEAYIADLDAK;EEMGIGGVLGLLWFQR;EGDYVLFHHEGGVDVGDVDAK;EHEVTIFVR;EILIPVFK;FGGALDAAAK;GAIVPAQEVPPPTVPMDYSWAR;GGPNYQEGLR;GQELIYAGMPITEVFK;GVTIIGPATVGGIKPGC[+57.0214635]FK;HLLVHAPEDK;HLLVHAPEDKK;HPWDDISYVLPEHMSM;IGNTGGMLDNILASK;ILIIGGSIANFTNVAATFK;KPASFMTSIC[+57.021463…		7.24165	7.30838	7.37359	6.60797	6.60306	6.55913	5.53007	5.50282	5.46903	7.18809	7.16531	7.27998	6.64301	6.44151	6.36139	5.51255	5.6326	5.52921	7.15963	7.27779	7.32857	6.45031	6.63515	6.59866	5.32434	5.45405	5.4284
sp|P48024|EIF1_MOUSE;sp|Q9CXU9|EIF1B_MOUSE	3	FAC[+57.0214635]NGTVIEHPEYGEVIQLQGDQR;GDDLLPAGTEDYIHIR;TLTTVQGIADDYDK		0.576917	0.679254	0.461177	-0.153323	-0.294797	-0.155718	-0.469485	0.0163493	-0.0703504	0.54882	0.973928	0.94839	-0.55625	0.110028	0.68455	-0.086138	-0.806105	0.127577	1.46033	1.02758	1.21078	0.543726	-0.331184	0.286059	0.250035	-0.196872	-0.432342
sp|Q9Z277|BAZ1B_MOUSE	21	AGTGENAPWVVEDELVK;AGTGENAPWVVEDELVKK;DEAEDYYDVIEHPMDFQTIQNK;ELDELLSC[+57.0214635]LHPQGIR;FSDFLLDPYK;GGLGYMEGTSEFEAR;IISNVPADSLIR;ILMTYSVQDHMETR;LADDEGDSDSESVGQSR;LETSEFFELTSEEK;LSEIPLTLHSVSELVR;LVDSAWLEIMTK;LVLEMVHHNTASLEK;MKQMTLLDMAK;NASVNAHHGPALEAVETTVPK;QVFANAELYNC[+57.0214635]R;SC[+57.0214635]DGNQELLNFLR;TEQC[+57.0214635]LLALLQK;YAVGEEC[+57.0214635]DFEVGK;YQEITHSIYLAR;YWLFSNEVPGLFIEK		2.7222	2.68628	2.66652	2.4556	2.60276	2.27375	2.20348	2.31191	2.38964	2.64722	2.71017	2.81469	2.35549	2.40847	2.49683	2.38046	2.22401	2.50799	2.66945	2.70992	2.58124	2.48971	2.42944	2.55541	2.10928	2.16824	2.37913
sp|Q9JKF1|IQGA1_MOUSE	37	ALESGDMTTVWK;ALQSLALGLR;ATFYGEQVDYYK;EEIQSSISGVTAAYNR;EKLEAYQHLFYLLQTNPTYLAK;EQLSDMMMINK;EQLWLANEGLITK;FALGISAINEAVDSGDVGR;FDVPGDENAEMDAR;FQPGETLTEILETPATNEQEAEHQR;GLQTQNSDWYMK;GVLLEIEDLQANQFK;HTDNVIQWLNAMDEIGLPK;IFYPETTDIYDR;IFYPETTDIYDRK;IIGNLLYYR;ILAIGLINEALDEGDAQK;LEGVLAEVAQHYQDTLIR;LFQTALQEEIK;LGLAPQIQDLYGK;LPYDVTPEQALSHEEVK;LQQTYSALNSK;LTAEEMDER;LTELGTVDPK;MFLGDNAHLSIINEYLSQSYQK;MLQHAASNK;Q…		4.23355	4.24433	4.18832	4.80233	4.62682	4.74505	4.67966	4.82258	4.83437	4.19592	4.3723	4.4193	4.45433	4.52795	4.7542	5.2379	5.20776	5.27021	4.71221	4.63438	4.71914	4.97166	4.48385	4.85309	5.14465	4.72531	4.79871
sp|P62192|PRS4_MOUSE	16	AVANQTSATFLR;DLLEPGC[+57.0214635]SVLLNHK;DYLLMEEEFIR;ESVELPLTHPEYYEEMGIKPPK;GVILYGPPGTGK;IETLDPALIRPGR;IKDYLLMEEEFIR;KYEPPVPTR;LPLVTPHTQC[+57.0214635]R;MTLADDVTLDDLIMAK;MTLADDVTLDDLIMAKDDLSGADIK;NQEQMKPLEEK;NQEQMKPLEEKQEEER;TMLELLNQLDGFDSR;TMLELLNQLDGFDSRGDVK;VHAVIGVLMDDTDPLVTVMK		5.01504	5.01851	4.97508	4.67851	4.51461	4.53222	4.33532	4.63474	4.53384	4.99959	5.1898	5.25305	4.47705	4.56615	4.66027	4.66939	4.72552	4.65838	5.21223	5.13311	5.13311	4.77908	4.49512	4.67627	4.56042	4.58138	4.60942
sp|P49722|PSA2_MOUSE	10	AANGVVLATEK;AANGVVLATEKK;GYSFSLTTFSPSGK;HIGLVYSGMGPDYR;KLAQQYYLVYQEPIPTAQLVQR;LAQQYYLVYQEPIPTAQLVQR;LVQIEYALAAVAGGAPSVGIK;RYNEDLELEDAIHTAILTLK;SVHKVEPITK;YNEDLELEDAIHTAILTLK		5.09205	5.30513	5.26729	5.06943	5.02443	4.99526	4.69386	4.95496	4.70787	5.11005	5.3069	5.37751	5.04726	4.90197	4.78138	4.75501	5.0891	4.87873	5.26272	5.40382	5.36047	5.02729	5.10299	5.04622	4.41146	4.83078	4.91744
sp|Q61191|HCFC1_MOUSE	23	AGHC[+57.0214635]AVAINTR;APVTVTSLPASVR;AWNNQVC[+57.0214635]C[+57.0214635]K;C[+57.0214635]YLFGGLANDSEDPK;C[+57.0214635]YLFGGLANDSEDPKNNIPR;ESHTAVVYTEK;GAPGQPGTILR;GPFSEISAFK;IATGHGQQGVTQVVLK;KAWNNQVC[+57.0214635]C[+57.0214635]K;LGDLWTLDIETLTWNKPSLSGVAPLPR;LLVFGGMVEYGK;LVIYGGMSGC[+57.0214635]R;LVTPVTVSAVKPAVTTLVVK;MQAAATLTEVANGIESLGVKPDLPPPPSK;MYVFGGWVPLVMDDVK;SLHSATTIGNK;SPDGAHLTWEPPSVTSGK;VASSPVM…		4.52208	4.61781	4.70088	4.26726	4.1397	4.11237	3.78654	3.63873	3.7249	4.4751	4.48044	4.50558	4.34163	4.0241	3.96698	3.71074	3.74911	3.60751	4.45386	4.56884	4.54474	4.04692	4.1235	4.13662	3.39566	3.63503	3.69048
sp|P97760|RPB3_MOUSE	5	FIIENTDLAVANSIR;HTVYPKPEEWPK;ITELTEENVK;LGLIPLTSDDIVDKLQYSR;SEYSELDEDESQAPYDPNGKPER		1.48133	1.60934	1.68746	1.13501	0.898844	1.14291	0.697238	0.734668	0.577987	1.4239	1.5323	1.92735	1.15252	1.02191	1.05054	0.55332	1.03894	0.457723	1.80813	1.85038	1.90258	1.2215	1.016	1.09581	0.748588	0.655253	0.767976
sp|Q9CWK8|SNX2_MOUSE	16	AVNTQALSGAGILR;EDSSSTEFVEK;ELSANTAAFAK;HPTLLQDPDLR;LHASVEALVC[+57.0214635]HR;MMVANKPDK;MMVANKPDKIQQAK;MNESDAWFEEK;MNESDAWFEEKQQQFENLDQQLR;QQQFENLDQQLR;SAAMLGNSEDHTALSR;SISAPVIFDR;VGDGMNAYMAYR;VGKEDSSSTEFVEK;WEDAQITLLK;YLESLVQTQQQLIK		4.12204	4.08561	4.08339	4.79287	4.68569	4.82032	4.89808	4.92323	4.80572	4.27808	4.2759	4.50139	5.13171	4.90646	5.04774	5.54097	5.93546	5.4515	4.28232	4.49479	4.32024	4.82916	4.85031	5.07427	5.11238	4.83439	4.87643
sp|Q5SWU9-2|ACACA_MOUSE;sp|Q5SWU9|ACACA_MOUSE	42	AAEEVGYPVMIK;AVVMDLLR;AYIAYELNSVQHR;AYVWDNNKDLVEWLEK;DEPIHILNVAIK;DNTC[+57.0214635]VVEFQFMLPTSHPNR;EGLPLMVFANWR;GGSWVVIDPTINPR;GVINDILDWK;HLEVQILADQYGNAISLFGR;HMEMYADR;HSDLVTKEASFEYLQNEGER;IGSFGPQEDLLFLR;IHNANPELTDGQIQAMLR;IIEEAPAAIATPAVFEHMEQC[+57.0214635]AVK;IIQQAGQVWFPDSAFK;ITDIIGKEEGLGAENLR;IYVAANSGAR;LGGIPVGVVAVETR;LGTPELSPTER;LLETESFQLNR;MMYGVSPWGDAPIDFENSAHVPC[+57.0214635]PR;NFDLTAIPC[+57.…		4.36397	4.44953	4.50635	5.04853	5.03375	5.08239	4.05848	4.02095	4.04422	4.53735	4.51247	4.64578	5.03448	4.76924	4.66552	3.73573	3.91721	3.73593	4.45438	4.62909	4.52722	5.01738	5.15371	5.08222	3.98236	4.26425	4.36795
sp|Q9QUR7|PIN1_MOUSE	6	GQMQKPFEDASFALR;SGEEDFESLASQFSDC[+57.0214635]SSAK;SKEEALELINGYIQK;TGEMSGPVFTDSGIHIILR;TGEMSGPVFTDSGIHIILRTE;VYYFNHITNASQWERPSGGSTVGGSSK		2.88183	2.72629	2.85421	2.56602	2.08318	2.07191	2.0582	2.11936	1.90989	2.92089	3.01163	3.10699	2.48801	2.43561	2.14159	2.31882	2.21835	2.20557	3.09803	3.00264	3.04845	2.52979	2.1831	2.15103	1.81429	1.97696	2.06134
sp|Q3TKT4-2|SMCA4_MOUSE;sp|Q3TKT4|SMCA4_MOUSE	20	AGQLEAWLEMNPGYEVAPR;AIEEGTLEEIEEEVR;AIEEGTLEEIEEEVRQK;AVATYHANTER;C[+57.0214635]DMSALQR;DSEAGSSTPTTSTR;ELPEYYELIR;EVDYSDSLTEK;EVEAQLPEKVEYVIK;GLDPVEILQER;GLQSYYAVAHAVTER;GPTPFNQNQLHQLR;GVLLTDGSEK;HEEEFDLFMR;HIIENAKQDVDDEYGVSQALAR;IPDPDSDDVSEVDAR;IQELENLPGSLAGDLR;KIPDPDSDDVSEVDAR;LTC[+57.0214635]EEEEEKMFGR;QDVDDEYGVSQALAR		4.51843	4.52121	4.52032	4.21489	4.21957	4.17633	3.955	3.90553	3.83699	4.39184	4.43494	4.45747	4.11365	4.0757	4.13166	3.81853	3.94817	3.55943	4.38766	4.55164	4.40228	4.10261	4.20595	4.40917	3.75564	3.80134	3.96731
sp|O08807|PRDX4_MOUSE	10	DYGVYLEDSGHTLR;ENEC[+57.0214635]HFYAGGQVYPGEASR;GLFIIDDKGVLR;HGEVC[+57.0214635]PAGWKPGSETIIPDPAGK;IPLLSDLNHQISK;ISKPAPYWEGTAVINGEFK;LVQAFQYTDK;QITLNDLPVGR;SINTEVVAC[+57.0214635]SVDSQFTHLAWINTPR;VSVADHSLHLSK		7.48152	7.48917	7.8072	7.28017	7.19496	7.47502	6.81308	6.92845	6.92948	7.39035	7.46501	7.59403	7.05618	7.02228	7.07533	6.67229	6.97209	6.77903	7.49201	7.83339	7.51127	7.22035	7.17929	7.48493	6.49866	7.01501	6.79348
sp|P40124|CAP1_MOUSE	17	ALLATASQC[+57.0214635]QQPAGNK;C[+57.0214635]VNTTLQIK;EFHTTGLAWSK;EMNDAAMFYTNR;GAVPYVQAFDSLLANPVAEYLK;HAEMVHTGLK;INSITVDNC[+57.0214635]K;INSITVDNC[+57.0214635]KK;KEPALLELEGK;LEAVSHTSDMHC[+57.0214635]GYGDSPSK;LGLVFDDVVGIVEIINSR;LSDLLAPISEQIQEVITFR;NSLDC[+57.0214635]EIVSAK;SALFAQINQGESITHALK;SSEMNVLIPTEGGDFNEFPVPEQFK;TDGC[+57.0214635]HAYLSK;VENQENVSNLVIDDTELKQVAYIYK		4.76677	4.78413	4.84303	5.20478	5.19841	5.12912	5.28276	5.33493	5.30594	4.58055	4.63781	4.54717	5.23452	5.07513	5.15258	5.66923	5.91922	5.67856	4.45039	4.62556	4.66166	4.93256	5.14643	5.2347	5.20913	5.23632	5.13754
sp|Q9JHW2|NIT2_MOUSE	14	ADLYTVESK;AGTEETILYSDIDLK;AGTEETILYSDIDLKK;ASYVAWGHSTVVDPWGQVLTK;AVDNQVYVATASPAR;ESSIYLIGGSIPEEDAGK;FAELAQIYAQR;GC[+57.0214635]QLLVYPGAFNLTTGPAHWELLQR;LALIQLQVSSIK;LALIQLQVSSIKSDNLTR;LYNTC[+57.0214635]SVFGPDGSLLVK;RADLYTVESK;TLSPGDSFSTFDTPYC[+57.0214635]K;VGLGIC[+57.0214635]YDMR		4.86318	4.80697	4.81988	4.46192	4.24533	4.20044	3.91308	3.81989	3.82197	4.6874	4.58805	4.48414	4.46093	4.23886	4.1202	3.63031	3.42378	3.60401	4.52133	4.50884	4.55774	4.24766	4.21282	4.16738	3.40574	3.60854	3.65677
sp|Q9R0H0-2|ACOX1_MOUSE;sp|Q9R0H0|ACOX1_MOUSE	9	AAATFNPELITHILDGSPENTR;AFTTWTANAGIEEC[+57.0214635]R;EFGIADPEEIMWFK;EIENLILNDPDFQHEDYNFLTR;INESIGQGDLSELPELHALTAGLK;LVGGMVSYLNDLPSQR;SFLVGSAAQSLSK;TQEFILNSPTVTSIK;YDGNVYENLFEWAK		-1.57739	-1.76999	-1.44551	-0.0420277	-0.106609	-0.128606	1.5145	1.74395	1.64402	-1.54273	-1.56287	-1.33785	0.480526	0.380991	0.371776	2.24994	2.39516	2.461	-1.13527	-0.707209	-1.34377	0.495444	0.262605	0.210644	1.7866	1.61869	1.88476
sp|Q8CFI7|RPB2_MOUSE	29	AYFLGYMVHR;DC[+57.0214635]QIAHGAAQFLR;DGAPSPMMPNEAR;EGEEQLQTQHQK;GEIGDATPFNDAVNVQK;GFDQEEVFEKPTR;GNEVLYNGFTGR;HAIYEKLDDDGLIAPGVR;ISNLLSDYGYHLR;IVEDAPPIDLQAEAQHASGEVEEPPR;KGFDQEEVFEKPTR;LFEASDPYQVHVC[+57.0214635]NLC[+57.0214635]GIMAIANTR;LLFQELMSMSIAPR;LTFASTLSHLR;MATNTVYVFAK;MDTLAHVLYYPQKPLVTTR;MTIGHLIEC[+57.0214635]LQGK;QEDMPFTC[+57.0214635]EGITPDIIINPHAIPSR;QEVPIIIVFR;QLHNTLWGMVC[+57.0214635]PA…		4.58119	4.59087	4.75197	4.11477	4.06967	4.10956	3.58185	3.54639	3.52597	4.46789	4.51793	4.60849	4.16799	3.91311	3.89017	3.44524	3.70295	3.49607	4.51913	4.61621	4.5675	3.9917	4.14992	4.00705	3.24923	3.59797	3.56282
sp|Q68FD5|CLH1_MOUSE	82	ADDPSSYMEVVQAANASGNWEELVK;AFMTADLPNELIELLEK;AHIAQLC[+57.0214635]EK;AHMGMFTELAILYSK;AHTMTDDVTFWK;ALEHFTDLYDIK;ALEHFTDLYDIKR;ANVPNKVIQC[+57.0214635]FAETGQVQK;AVDVFFPPEAQNDFPVAMQISEK;AYEFAERC[+57.0214635]NEPAVWSQLAK;C[+57.0214635]NEPAVWSQLAK;DAMQYASESK;DPELWGSVLLESNPYR;DTELAEELLQWFLQEEK;DTELAEELLQWFLQEEKR;EDKLEC[+57.0214635]SEELGDLVK;ENPYYDSR;ESNC[+57.0214635]YDPER;ESNC[+57.0214635]YDPERVK;ESYVETELI…		8.07017	8.14259	8.21837	8.78192	8.72369	8.72084	8.85024	8.7279	8.90174	8.11473	8.10984	8.1052	9.06584	8.77536	8.77156	9.33594	9.52765	9.37425	8.00289	8.05832	8.09993	8.63923	8.73351	8.44505	8.7751	8.69858	8.79964
sp|Q8CFA2|GCST_MOUSE	10	AHSPILNTEGTVIGTVTSGC[+57.0214635]PSPSLKK;C[+57.0214635]GYTGEDGVEISVPATGAVHLATTLLK;DKDLALMQDK;DSHVDSHLHTR;HC[+57.0214635]SLFDVSHMLQTK;MPFVPTNYYTLK;MVAFAGWSLPVQYR;TPLYDFHLAHGGK;VGLIC[+57.0214635]EGAPVR;YSRPGTQLLVEVR		4.1044	4.16741	4.23069	4.05545	4.05108	4.03855	3.53899	3.53551	3.54263	4.01677	3.99669	4.00517	4.17487	3.89	3.88984	2.97008	3.20277	2.94252	4.12885	4.19741	4.2738	4.06696	4.27917	4.27117	3.22935	3.55458	3.4926
sp|P53569|CEBPZ_MOUSE	14	AASWVHFDNLK;ELLITDLLPDSR;ETEPESSAEAEKPK;FDTIGMNAMANR;GKENTDSVVMQPK;KSEDDFDFAGSFQGQK;MLDPGLTTC[+57.0214635]SK;NGFSLEEVLR;NPLFC[+57.0214635]GAENTTLWELK;NPLFC[+57.0214635]GAENTTLWELKK;QAMFLNLIYK;SEDDFDFAGSFQGQK;SFNDSSLFVSAEEFGHLLDENMGSK;SLIEEDEPEKK		3.04057	3.01714	3.15661	2.04079	1.9362	1.87878	1.31954	1.31853	1.38994	2.96482	3.11139	3.2892	1.83555	1.89318	2.12306	1.33413	1.35557	1.61765	3.21453	3.1552	3.16177	2.06226	2.07528	2.22863	1.33075	1.4226	1.56638
sp|P70698|PYRG1_MOUSE	15	ENFC[+57.0214635]NIHVSLVPQPSSTGEQK;FSDSYASVIK;FVGQDVEGER;GLGLSPDLVVC[+57.0214635]R;GVIASSVGTILK;IQAIAWAR;ISMFC[+57.0214635]HVEPEQVIC[+57.0214635]VHDVSSIYR;IYQYVINK;KLYGDTDYLEER;LC[+57.0214635]SAHGVLVPGGFGVR;LYGDTDYLEER;NVLGWQDANSTEFDPK;TSHPVVIDMPEHNPGQMGGTMR;TVQVVPHITDAIQEWVMR;VPLLLEEQGVVDYFLR		5.13342	5.18286	5.17335	4.39274	4.39177	4.35233	3.88375	3.81054	3.81937	5.08187	5.04006	5.09754	4.33278	4.14341	4.13765	3.74625	3.86123	3.65283	4.91508	5.03493	5.03889	4.26208	4.55895	4.43109	3.78173	3.99763	4.01691
sp|Q3URS2|ZSC4F_MOUSE	1	QEQLISDPVLLGK		-4.41409	-3.716	-3.82636	-0.191632	-0.354331	0.0230566	-3.39046	-4.40456	-3.8071	-4.98857	-3.89379	-3.29327	1.27512	1.19069	1.53058	-4.47763	-3.20824	-3.97089	-4.06582	-4.03928	-3.68829	1.98098	1.91281	2.41765	-1.0652	-0.830949	-1.77663
sp|P16546-2|SPTN1_MOUSE	1	QGQIDNQYQSLLELGEK		-2.68219	-2.85871	-2.33482	-1.73734	-2.32665	-1.74325	-1.60903	-2.09579	-1.68863	-2.52558	-2.44292	-2.27487	-2.63372	-1.93451	-1.56608	-1.93828	-2.11296	-2.27136	-2.11755	-1.98722	-2.63817	-1.64996	-2.58611	-1.47666	-1.46354	-2.11013	-1.79853
sp|P30416|FKBP4_MOUSE	32	AAENGAQSAPLPLEGVDISPK;AAENGAQSAPLPLEGVDISPKQDEGVLK;AEVAAGDHPTDAEMK;AEVAAGDHPTDAEMKGER;AKESWEMSSAEK;ALELDSNNEK;ALELDSNNEKGLFR;AWDIAVATMK;DKFSFDLGK;EGTGTETPMIGDR;ESWEMSSAEK;ESWEMSSAEKLEQSNIVK;FQIPPHAELR;FSFDLGKGEVIK;GEAHLAVNDFDLAR;GEDLTEEEDGGIIR;GEGYARPNDGAMVEVALEGYHK;GEHSIVYLKPSYAFGSVGK;IVSWLEYESSFSGEEMQK;LASHLNLAMC[+57.0214635]HLK;LEQSNIVK;LQAFSAAIESC[+57.0214635]NK;LYANMFER;MEKGEHSIVYLKPSYAFGSVG…		7.73954	7.66773	7.72939	7.06071	6.83327	6.84996	6.69316	6.73606	6.6467	7.66421	7.699	7.75878	6.83223	6.68747	6.79772	6.48483	6.38372	6.35453	7.81801	7.72241	7.75947	6.89717	6.67991	6.93483	6.35461	6.45309	6.52844
sp|P47791-2|GSHR_MOUSE;sp|P47791|GSHR_MOUSE	14	ADFDNTVAIHPTSSEELVTLR;ALLTPVAIAAGR;ALLTPVAIAAGRK;GHILVDEFQNTNVK;GVYAVGDVC[+57.0214635]GK;IYSTAFTPMYHAVTTR;KPTTTMIPDVDC[+57.0214635]LLWAIGR;LGGTC[+57.0214635]VNVGC[+57.0214635]VPK;LNTIYQNNLTK;MVC[+57.0214635]ANKEEK;NFDSLISSNC[+57.0214635]TEELENAGVEVLK;TSSGLELQVVTSVPGR;VGIQTDEKGHILVDEFQNTNVK;VVGIHMQGIGC[+57.0214635]DEMLQGFAVAVK		4.98448	4.98895	5.1172	4.98364	5.04831	5.04266	4.97666	5.09419	5.05211	4.71137	4.69809	4.71854	5.00524	4.90972	4.96745	5.01818	5.24377	4.98664	4.52613	4.73624	4.78115	4.76314	5.10672	5.25033	4.99259	5.07052	4.98687
sp|Q60972|RBBP4_MOUSE	5	EAAFDDAVEER;GEFGGFGSVSGK;HPSKPDPSGEC[+57.0214635]NPDLR;IGEEQSPEDAEDGPPELLFIHGGHTAK;YMPQNPC[+57.0214635]IIATK		4.86189	4.71492	4.87663	4.27268	4.07803	4.1368	3.70215	3.61366	3.55625	4.77988	4.78051	4.85952	4.21931	4.04288	4.24479	3.39182	2.93691	3.39625	5.00449	4.96482	5.01031	4.08283	4.16895	4.56764	3.5218	3.53574	3.46998
sp|Q9Z0H3-2|SNF5_MOUSE	1	IVASSHDHGYTTLATSVTLLK		-6.39123		-7.47179							-6.10645	-7.19259	-6.84037								-6.68108	-7.55381
sp|P42208|SEPT2_MOUSE	10	ASIPFSVVGSNQLIEAK;ILDEIEEHSIK;LTVVDTPGYGDAINC[+57.0214635]R;LYPWGVVEVENPEHNDFLK;QQPTQFINPETPGYVGFANLPNQVHR;STLINSLFLTDLYPER;TIISYIDEQFER;TMLITHMQDLQEVTQDLHYENFR;TVQIEASTVEIEER;YLHDESGLNR		3.36892	3.36323	3.315	3.77434	3.7588	3.62909	3.78247	3.78759	3.86563	3.24313	3.3565	3.41284	3.47742	3.69367	3.75547	3.6159	3.60178	3.69648	3.25908	3.26838	3.30508	3.86926	3.63181	3.53349	3.87444	3.81049	3.89192
sp|Q61879|MYH10_MOUSE	56	ADMEDLMSSKDDVGK;ALEDETKNHEAQIQDMR;ALEEALEAKEEFER;ALEQQVEEMR;AMVNKDDIQK;AVIYNPATQADWTAK;C[+57.0214635]MLQDREDQSILC[+57.0214635]TGESGAGK;DAAGLESQLQDTQELLQEETR;DLEAQIEAANK;DNFQETMEAMHIMGFSHEEILSMLK;EIFMQVEDERR;ELDDATEANEGLSR;ELEAELEDER;ELQAQIAELQEDFESEKASR;EQADFAVEALAK;FLSNGYIPIPGQQDK;HADQYKEQMEK;HAEQERDELADEIANSASGK;HATALEELSEQLEQAK;HATALEELSEQLEQAKR;HGFEAASIKEER;HWQWWR;IAEC[+57.0214635]SSQLAEEEEK;…		4.10718	4.08718	4.1644	5.6301	5.36473	5.44939	5.51759	5.47809	5.50343	4.12107	4.29056	4.47293	5.16281	5.1261	5.16252	5.14198	5.21007	4.87924	3.81312	3.90209	3.69201	5.56999	5.34006	5.66984	5.59715	5.61857	5.77009
sp|Q9R0Q9|MPU1_MOUSE	4	C[+57.0214635]YDQLFVQWDLLHVPC[+57.0214635]LK;GLGLGIVAGSLLVK;GLLVPILLPEK;LLQAATNYR		3.335	3.49936	3.75511	3.27438	3.82078	3.79567	3.69985	3.81449	3.94735	3.54763	3.41505	3.73011	3.65811	3.55907	3.66976	3.76836	3.98674	4.09251	3.53277	3.64043	3.70242	3.48663	3.7116	3.75683	3.77627	3.66114	3.76283
sp|P49443|PPM1A_MOUSE	5	EAELDKYLESR;GPTEQLVSPEPEVHDIER;GSAGAPSVENVK;TGFLEIDEHMR;VC[+57.0214635]NEVVDTC[+57.0214635]LYK		2.11083	1.96775	1.93025	1.7161	1.48648	1.56068	1.45903	1.76072	1.56052	1.88341	2.07127	1.92001	1.6808	1.54577	1.69596	1.84658	2.06448	1.88265	2.06621	2.04014	1.98891	1.55714	1.74952	1.86707	1.51286	1.63171	1.51573
sp|Q99K51|PLST_MOUSE	6	ANDDIIVNWVNR;EGIC[+57.0214635]ALGGTSELSSEGTQHSYSEEEK;KLENC[+57.0214635]NYAVELGK;LNLAFVANLFNK;YPALTKPENQDIDWTLLEGETR;YTLNVLEDLGEGQK		-0.0731839	-0.193735	-0.338863	0.617563	0.380048	0.370771	0.466502	0.657726	0.481587	-0.629394	-0.528583	-0.589945	0.420571	0.640117	0.783106	1.50024	1.16134	1.46533	-1.1119	-1.15003	-0.789622	0.608122	0.299916	0.356986	1.36839	0.835249	0.5266
sp|Q99LC2|CSTF1_MOUSE	8	AHDGAEVC[+57.0214635]SAIFSK;C[+57.0214635]IVHSPTNPGFMTC[+57.0214635]SDDFR;LGMENDDTAVQYAIGR;LWEISTGR;SAMPIEVMMNETAQQNMENHPVIR;TLYDHVDEVTC[+57.0214635]LAFHPTEQILASGSR;TQAVFNHTEDYILLPDER;YIQEAEMLR		3.14977	3.12594	3.15923	2.66467	2.77139	2.61354	2.69578	2.65206	2.5079	3.1718	3.05975	3.09044	2.87179	2.76461	2.71579	2.67228	2.86859	2.58954	2.98666	3.16447	3.09511	2.70288	2.98156	2.92734	2.53712	2.60422	2.54171
sp|Q8BTM8|FLNA_MOUSE	84	AEISFEDR;AEVGVPAEFGIWTR;AFGPGLQGGNAGSPAR;AGNNMLLVGVHGPR;AHVAPC[+57.0214635]FDASK;ALTQTGGPHVK;ANLPQSFQVDTSK;ANLPQSFQVDTSKAGVAPLQVK;APSVANIGSHC[+57.0214635]DLSLK;AWGPGLEGGIVGK;AYGPGIEPTGNMVK;C[+57.0214635]APGVVGPTEADIDFDIIR;C[+57.0214635]GQSAAVASPGGSIDSR;C[+57.0214635]SGPGLSPGMVR;C[+57.0214635]SYQPTMEGVHTVHVTFAGVPIPR;DAGEGGLSLAIEGPSK;DAGEGLLAVQITDPEGKPK;DKGEYTLVVK;DNGNGTYSC[+57.0214635]SYVPR;DVDIID…		7.62958	7.56697	7.70436	7.63098	7.44387	7.47718	7.38771	7.42512	7.30588	7.35117	7.43136	7.59031	7.30237	7.19978	7.25314	7.78234	7.99182	7.67625	7.1965	7.25344	7.24118	7.25416	7.34244	7.64234	7.34615	7.39628	7.342
sp|O35326|SRSF5_MOUSE	8	DADDAVYELDGK;DADDAVYELDGKELC[+57.0214635]SER;GFGFVEFEDPR;GFGFVEFEDPRDADDAVYELDGK;LNEGVVEFASYGDLK;LNEGVVEFASYGDLKNAIEK;QAGEVTFADAHRPK;VSWQDLKDFMR		4.31841	4.2333	4.22771	4.40168	4.25172	4.20987	4.22319	4.26688	4.06543	4.2351	4.26645	4.3851	4.50963	4.28197	4.21775	4.22364	4.34903	4.21206	4.34327	4.38916	4.2118	4.4068	4.39131	4.40156	4.17622	4.30841	4.13858
sp|Q8C0I1|ADAS_MOUSE	21	AASAAGASPAATPAAPESGTIPK;DWIQNTLGVSLEHK;EEILANGGSLSHHHGVGK;ESISDVGFGMLK;FGGLAAGEDNGQR;GFDPNQISVATLLFEGDR;GFDPNQISVATLLFEGDREK;GVQFAPLSTC[+57.0214635]R;ILWVDENNLTAHVEAGITGQDLER;IPDIVVWPTC[+57.0214635]HDDVVK;ISYSQEADDR;ISYSQEADDRVFR;MSTGPDIHHFIMGSEGTLGVITEATIK;NIYGNIEDLVVHMK;RAASAAGASPAATPAAPESGTIPK;SVKEYVDPSNIFGNR;TIISLDTSQMNR;TSINPSEAPPSIVNEDFLQELKEAR;WNGWGYNDSK;YGSVAFPNFEQGVAC[+57.0214635]LR;YPLS…		3.9346	3.9477	4.08147	4.32216	4.43092	4.30396	4.47897	4.54319	4.53464	3.83331	3.74733	3.80581	4.48839	4.2937	4.4108	4.31912	4.43529	4.3543	3.8098	3.89249	4.01309	4.42123	4.73674	4.58828	4.63856	4.76827	4.78226
sp|Q9D3U0|PUS10_MOUSE	6	DIGFLDDLKDLK;EGVSVTEDESMAEKPSK;HVAQLLFSSGTC[+57.0214635]PR;MESSVEELISDHLLAVFR;TVC[+57.0214635]TVLEVEC[+57.0214635]THGAVFVAGR;WITHPLFSEELGVPTDGK		-0.97356	-0.891994	-0.790694	-0.91818	-0.860016	-0.675948	-0.993483	-0.733905	-0.981144	-1.0216	-0.560047	-0.701674	-0.894665	-0.799748	-1.5678	-0.955521	-0.501513	-0.733686	-0.973978	-0.663868	-0.837228	-0.554398	-0.605884	-1.7709	-1.4463	-0.296674	-0.135369
sp|P42669|PURA_MOUSE	4	FFFDVGSNK;GPGLGSTQGQTIALPAQGLIEFR;LIDDYGVEEEPAELPEGTSLTVDNKR;NSITVPYK		1.73923	1.87619	1.84569	1.35763	1.3309	1.3199	1.23662	1.57668	1.38474	1.9114	2.13168	2.25706	1.20881	1.38944	1.42773	1.41239	1.72683	1.48207	2.51172	2.64926	2.64257	1.56701	1.49872	1.89227	1.44134	1.4539	1.5437
sp|Q6NZJ6|IF4G1_MOUSE	27	ATSLLLEILGLLC[+57.0214635]K;DITEEIMSGAR;DKDDDEVFEK;EAEMEEHREHIK;EAVGDLLDAFK;EDAFYSWESSKDPAEQQGK;EFLAEGQDVGSFVAEK;EMDEAATAEER;FMLQDVLDLR;FSALQQTLPAENTDNR;FSALQQTLPAENTDNRR;GLPLVDDGGWNTVPISK;GSSGGSGAKPSDTASEATRPATLNR;GVIDLIFEK;IHNAENIQPGEQK;ITKPGSIDSNNQLFAPGGR;KVEYTLGEESEAPGQR;LGIESTLER;LKEELEEAR;LLTTIGKDLDFAK;LTPQMFQQLMK;QKEMDEAATAEER;QVTQLAIDTEER;SDQWKPLNLEEK;SVTAFFNWLR;VEYTLGEESEAPGQR;VPTTEKPTVT…		5.94639	6.01086	5.99761	5.22076	5.15286	5.18745	4.56228	4.60761	4.63534	5.9205	6.08166	6.30526	5.04117	4.9263	4.95615	4.92685	4.94844	4.75728	6.09565	6.07713	6.06494	5.3001	4.94785	5.15219	4.53428	4.5464	4.8488
sp|Q99L27|GMPR2_MOUSE	4	AFGAGADFVMLGGMLAGHSESGGELIER;GHIISDGGC[+57.0214635]SC[+57.0214635]PGDVAK;LFYGMSSEMAMK;TGVGYPQLSAVMEC[+57.0214635]ADAAHGLK		-0.279461	-0.730645	-0.276239	-0.0560032	-0.38435	-0.604458	0.0933212	-0.240404	-0.277076	-0.46046	-0.568039	-0.573371	-0.146682	-0.264769	-0.651232	-0.17766	-0.912064	-0.385638	-0.578335	-0.776817	-0.774414	-0.451758	-0.410201	-0.495979	-0.550303	-0.293143	-0.327555
sp|Q8K1Z0|COQ9_MOUSE	2	INDAMNMGHTAK;YTDQSGEEEEDYESEEQLQHR		-4.12139	-3.43395	-3.25157	-2.76884	-3.50852	-2.98983	-3.29458	-3.31656	-3.2692	-3.43512	-3.46599	-3.66382	-3.37518	-3.25321	-2.99726	-2.93998	-2.84072	-3.38889	-3.32898	-3.34191	-3.91386	-2.77966	-2.90659	-2.42877	-3.15689	-3.28524	-3.11739
sp|P60843|IF4A1_MOUSE	15	AEVQKLQMEAPHIIVGTPGR;AILPC[+57.0214635]IKGYDVIAQAQSGTGK;ATQALVLAPTR;DFTVSAMHGDMDQK;DFTVSAMHGDMDQKER;DQIYDIFQK;EELTLEGIR;GFKDQIYDIFQK;GVAINMVTEEDKR;KEELTLEGIR;LNSNTQVVLLSATMPSDVLEVTK;LNSNTQVVLLSATMPSDVLEVTKK;LQMEAPHIIVGTPGR;TATFAISILQQIELDLK;VVMALGDYMGASC[+57.0214635]HAC[+57.0214635]IGGTNVR		7.98053	7.95996	8.08934	7.16273	7.0919	7.20735	6.79371	6.91176	6.84712	8.06629	8.06744	8.22869	7.06659	7.00139	7.19064	7.04174	6.93731	7.05668	8.19339	8.13452	8.13374	7.26989	7.13367	7.40365	7.02357	6.93034	6.86915
sp|P57780|ACTN4_MOUSE	40	AC[+57.0214635]LISLGYDVENDR;AC[+57.0214635]LISLGYDVENDRQGDAEFNR;AGTQIENIDEDFR;AGTQIENIDEDFRDGLK;ASFNHFDKDHGGALGPEEFK;ASIHEAWTDGKEAMLK;DDPVTNLNNAFEVAEK;DGLAFNALIHR;DHALLEEQSK;DYETATLSDIK;DYETATLSDIKALIR;ETTDTDTADQVIASFK;GISQEQMQEFR;HRPELIEYDK;HRPELIEYDKLR;HTNYTMEHIR;IAESNHIK;IC[+57.0214635]DQWDNLGSLTHSR;IMSVVDPNHSGLVTFQAFIDFMSR;ISIEMNGTLEDQLSHLK;ISIEMNGTLEDQLSHLKQYER;KDDPVTNLNNAFEVAEK;LSGSNPYTTVTP…		6.79266	6.66072	6.69022	6.16463	5.94221	5.97513	5.8357	6.01812	5.93281	6.81558	6.96092	7.08195	5.94631	6.04373	6.26497	6.20861	6.00742	6.19109	7.23901	7.16621	7.13014	6.36142	5.99194	6.41912	6.26556	5.94996	5.86405
sp|Q9JKV1|ADRM1_MOUSE	4	GLVYIQQTDDSLIHFC[+57.0214635]WK;LFFWMQEPK;SQSAAVTPSSSTSSAR;TSGTVEDDLIIFPDDC[+57.0214635]EFKR		3.54851	3.51903	3.63693	3.20438	3.20546	3.21935	3.06022	3.07482	3.06883	3.61954	3.54902	3.6456	3.49828	3.20426	2.98899	3.29605	3.53649	3.3632	3.5263	3.63791	3.48551	3.24825	3.43981	2.85705	2.94242	3.0618	3.14347
sp|Q99NB9|SF3B1_MOUSE	43	AAGLATMISTMRPDIDNMDEYVR;AFAVVASALGIPSLLPFLK;AIGYLIPLMDAEYANYYTR;AKGSETPGATPGSK;ATVNTFGYIAK;DTPGHGSGWAETPR;DYIYAVTPLLEDALMDR;EFQSPDEEMKK;EVMLILIR;GDTPGHATPGHGGATSSAR;GGDSIGETPTPGASK;GSETPGATPGSK;IC[+57.0214635]FELLELLK;IMGNLGAADIDHK;IVDDLKDEAEQYR;IVQQIAILMGC[+57.0214635]AILPHLR;IWDPTPSHTPAGAATPGR;IYNDDKNTYIR;IYNSIYIGSQDALIAHYPR;KLTATPTPLGGMTGFHMQTEDR;LLVDVDESTLSPEEQK;LLVDVDESTLSPEEQKER;LSSWDQAETPG…		5.81786	5.90315	5.93463	5.54934	5.54532	5.59939	5.25939	5.34379	5.35055	5.84893	5.94414	6.10342	5.49292	5.34689	5.49333	5.32146	5.37959	5.31017	5.96102	5.99062	5.87257	5.64905	5.44485	5.66269	5.26484	5.35593	5.38673
sp|Q6PDM2|SRSF1_MOUSE	11	DGTGVVEFVR;DGYDYDGYR;DIEDVFYK;EAGDVC[+57.0214635]YADVYR;EAGDVC[+57.0214635]YADVYRDGTGVVEFVR;GGPPFAFVEFEDPR;GGPPFAFVEFEDPRDAEDAVYGR;KEDMTYAVR;SHEGETAYIR;TKDIEDVFYK;VVVSGLPPSGSWQDLKDHMR		6.95293	6.73397	6.80451	6.44181	6.22372	6.10727	6.27871	6.2626	6.0209	6.81213	6.83505	7.02897	6.35347	6.32517	6.42369	6.31592	6.39807	6.24208	6.95245	6.84961	6.7824	6.41094	6.28297	6.62659	6.1008	6.20434	6.16656
sp|Q8VDD5|MYH9_MOUSE	97	AKLQEMESAVK;ALEEAMEQK;ALEEAMEQKAELER;ALELDSNLYR;ALEQQVEEMK;ANLQIDQINTDLNLER;C[+57.0214635]QYLQAEK;DELADEIANSSGK;DFSALESQLQDTQELLQEENR;DFSALESQLQDTQELLQEENRQK;DLEAHIDTANK;DMFQETMEAMR;DVLLQVEDERR;EEILAQAK;EEVGEEAIVELVENGK;EEVGEEAIVELVENGKK;ELEDATETADAMNR;ELEDATETADAMNREVSSLK;ELETQISELQEDLESER;ELETQISELQEDLESERASR;EMEAELEDER;EMEAELEDERK;EQEVSILKK;EQLEEEEEAK;EQLEEEEEAKR;FDQLLAEEKTISAK;FLSNGHVTIPGQQDK…		6.47856	6.54615	6.47937	7.85179	7.59044	7.69194	8.0229	7.99687	8.1863	6.37863	6.61535	6.71721	7.62244	7.6964	7.90402	8.84886	8.94542	8.68022	6.54475	6.59357	6.62016	7.91983	7.47636	7.96891	8.59564	8.08187	8.13711
sp|Q61263|SOAT1_MOUSE	9	DWWNSTSYSNYYR;EVGC[+57.0214635]HFDDFVTNLIEK;FILILEQIR;LLAAEAEELKPLFMK;NPTFLDYVRPR;QSLLDELFEVDHIR;SASLDNGGC[+57.0214635]ALTTFSILEEMKK;SGENPEQDEAQK;SGENPEQDEAQKNFMDTYR		0.384597	0.632267	0.720843	2.33015	2.26421	2.43327	3.1503	3.11392	3.16528	0.594656	0.524064	0.324891	2.54682	2.27868	2.38921	3.68368	3.72459	3.88544	-0.0771775	-0.137996	-0.189129	2.1555	2.24171	1.60076	3.2179	3.1799	2.99411
sp|Q9Z204-2|HNRPC_MOUSE	18	AAVAGEDGR;GFAFVQYVNER;IVGC[+57.0214635]SVHK;IVGC[+57.0214635]SVHKGFAFVQYVNER;KSDVEAIFSK;LKGDDLQAIK;MIAGQVLDINLAAEPK;MIAGQVLDINLAAEPKVNR;MYSYPARVPPPPPIAR;NEKSEEEQSSASVK;QADLSFSSPVEMK;QKVDSLLESLEK;SAAEMYGSSFDLDYDFQRDYYDR;SDVEAIFSK;SEEEQSSASVK;VDSLLESLEK;VFIGNLNTLVVK;VFIGNLNTLVVKK		6.87579	6.88851	6.67464	6.39684	6.14066	6.0422	5.93497	5.86615	5.79212	6.85362	6.84704	6.90752	6.35138	6.17598	6.15182	5.93042	5.81072	5.89096	6.96725	6.86305	6.85419	6.49467	6.13209	6.19807	5.92722	5.92957	5.82964
sp|Q62318|TIF1B_MOUSE	26	ADVQSIIGLQR;DC[+57.0214635]QLNAHKDHQYQFLEDAVR;DHQYQFLEDAVR;EEDGSLSLDGADSTGVVAK;FASWALESDNNTALLLSK;FASWALESDNNTALLLSKK;FQWDLNAWTK;HEPLVLFC[+57.0214635]ESC[+57.0214635]DTLTC[+57.0214635]R;IQKHQEHILR;IVAERPGTNSTGPGPMAPPR;IVAERPGTNSTGPGPMAPPRAPGPLSK;KLIYFQLHR;LDLDLTSDSQPPVFK;LGDKHATLQK;LIYFQLHR;LSPPYSSPQEFAQDVGR;LTEDKADVQSIIGLQR;MIVDPVEPHGEMK;MNDAFGDTK;QQC[+57.0214635]YSKDIVENYFMR;QVSDVQKR;SGEGEVSGLL…		8.73401	8.59095	8.7082	7.30912	7.0164	7.09534	6.68312	6.71223	6.57241	8.67113	8.67344	8.90783	7.20116	7.02568	7.02962	6.65123	6.73237	6.63342	8.80714	8.83015	8.74571	7.29978	7.12398	7.38343	6.65079	6.76232	6.78233
sp|Q99MN9|PCCB_MOUSE	9	AFDNDVDALC[+57.0214635]NLR;AYNMLDIIHAVIDER;EFFEIMPSYAK;GHQDVEAAQAEYVEK;IQEGVESLAGYADIFLR;ISLLLDPGSFMESDMFVEHR;LVPELDTVVPLESSK;SVTNEDVTQEQLGGAK;THTTVSGVAHR		0.550196	0.636096	0.651901	1.50104	1.38691	1.45206	1.91024	1.95453	1.77535	0.576344	0.789685	0.933831	1.71574	1.62633	1.54023	2.05598	2.2982	2.10527	0.444644	1.00852	0.996346	1.75055	1.85004	1.71888	2.00198	2.18838	2.23607
sp|Q62383|SPT6H_MOUSE	22	AAEDDELEEEADWIYR;DAQMLTEDVKR;DEFSHQVQEWNR;DHYQDPVPGITPSSSNR;DMYTIC[+57.0214635]QSAGLDGLAK;DTYYDFDAEAADHKQEEDMK;EELLNALYC[+57.0214635]EFINR;GVEGYGNDQTYFEEIK;HETEQFPAEPLELAK;IEYVTVTPEGFR;KPHVVTIAGENR;LDNGVTGFIPTK;LEDDDFDLIEENLGVK;LIIC[+57.0214635]NVTGIAHR;MMETMDQGDVIIRPSSK;MQAYQYEQISADPDKPLADGIR;SIFEMYEPSELESSHLTDQDNEIR;SPNTEEIFNMLTK;TPASINATPANINLADLTR;VAPYRPDQQVEEDDDFMDENQGK;VLGIAFSSAR;VNEVGVDVNR		3.89409	3.79058	3.96503	3.18349	3.01384	2.974	2.68202	2.64646	2.58549	3.83796	3.84616	4.12444	3.1286	2.91757	3.09556	2.685	2.85588	2.59766	4.02862	4.12611	4.08221	3.10621	3.13387	3.34998	2.60355	2.57419	2.74122
sp|P70333|HNRH2_MOUSE	5	ATENDIYNFFSPLNPMR;GLPWSC[+57.0214635]SAEEVMR;SNSVEMDWVLK;VTGEADVEFATHEDAVAAMAK;YGDGGSSFQSTTGHC[+57.0214635]VHMR		3.01775	3.14758	3.10922	2.75309	2.918	2.36357	2.41388	2.52452	2.66	2.89605	2.66422	2.53257	2.80524	2.58106	2.74075	2.36553	2.5864	2.19279	2.94316	2.70235	2.96994	2.53569	2.73481	2.7417	2.16197	2.39905	2.30292
sp|Q3TWW8|SRSF6_MOUSE	7	ALDKLDGTEINGR;C[+57.0214635]SWQDLKDFMR;DADDAVYELNSK;NGYGFVEFEDSR;NGYGFVEFEDSRDADDAVYELNSK;QAGEVTYADAHKER;TNEGVIEFR		5.01234	4.97304	4.88047	4.22315	4.37775	4.14156	4.27441	4.18944	3.95959	4.84547	4.91649	5.08529	4.60044	4.23218	4.32762	4.24134	4.57097	4.2007	5.0884	5.09956	4.89551	4.40509	4.47189	4.5723	4.06495	4.15072	4.11405
sp|Q8BT60|CPNE3_MOUSE	8	DIVQFVPFR;GSITISAEEIKDNR;NNLNPMWKPFK;SDPLC[+57.0214635]VLFLNTSGHQWYEVER;SSPVEYEC[+57.0214635]INEK;VEC[+57.0214635]YDYDNDGSHDLIGTFQTTMTK;VELNVSC[+57.0214635]NNLLDADVTSK;VVLFEMEAR		2.63075	2.63242	2.67528	3.27833	3.17431	3.10654	3.13586	3.21681	3.11011	2.56059	2.60302	2.78531	3.34331	3.16216	2.98434	2.97601	3.00972	2.9768	2.52058	2.54129	2.61976	3.31322	3.2687	3.06686	3.13619	3.28115	3.20776
sp|Q9CZ13|QCR1_MOUSE	15	EVESIGAHLNAYSTR;IPLAEWESR;IQEVDAQMLR;LC[+57.0214635]TSATESEVTR;MVLAAAGGVEHQQLLDLAQK;MVLAAAGGVEHQQLLDLAQKHLSSVSR;NALVSHLDGTTPVC[+57.0214635]EDIGR;NNGAGYFLEHLAFK;SGMFWLRF;TDLTDYLNR;VASEQSSHATC[+57.0214635]TVGVWIDAGSR;VVELLADIVQNSSLEDSQIEK;VVELLADIVQNSSLEDSQIEKER;VYEEDAVPGLTPC[+57.0214635]R;YFYDQC[+57.0214635]PAVAGYGPIEQLPDYNR		5.93138	5.98598	6.06904	6.06495	6.02513	5.86703	5.77394	5.81272	5.87725	5.97298	5.99066	5.89267	6.16393	6.03068	6.17684	5.88598	6.16467	5.90317	6.05668	6.13409	6.16059	6.10035	6.24088	6.33288	5.9456	6.04753	5.91176
sp|Q61699-2|HS105_MOUSE;sp|Q61699|HS105_MOUSE	36	AEDVSAIEIVGGATR;AGGIETIANEFSDR;AGGIETIANEFSDRC[+57.0214635]TPSVISFGSK;DLLNMYIETEGK;DVSTTLNADEAVAR;EKENLSYDLVPMK;ELNNVC[+57.0214635]EPVVTQPKPK;FFGKDVSTTLNADEAVAR;FIC[+57.0214635]EQEHEK;FQEAEERPK;FVVQNVSAQK;GPFELEAFYSDPQGVPYPEAK;KPVTDC[+57.0214635]VISVPSFFTDAER;KVDQPPEAK;LKETAENNLK;LLTETEDWLYEEGEDQAK;LMNDMTAVALNYGIYK;LMSSNSTDLPLNIEC[+57.0214635]FMNDK;LMSSNSTDLPLNIEC[+57.0214635]FMNDKDVSGK;LVEHFC[+5…		6.78888	6.79698	6.95383	4.5597	4.55972	4.38677	4.06867	4.14209	4.05141	6.73093	6.78356	6.94454	4.6199	4.46331	4.71514	4.18383	4.55013	4.15166	6.61412	6.70846	6.75399	4.41149	4.61439	4.679	4.0385	4.27058	4.27183
sp|Q8VC03|EMAL3_MOUSE	3	EIVSDVTDGNEQLSVVR;LVQWGPGLVALQEAEIPEHFGAVR;VLGAGSSGPAPATPSR		-3.64161	-3.31538	-3.22338	-1.66433	-2.20588	-1.98908	-1.34602	-1.42138	-1.56696	-3.35437	-3.05716	-2.61991	-1.30714	-1.76967	-1.65863	-0.945448	-0.760482	-0.928417	-3.14552	-2.95499	-3.39029	-1.50772	-1.89909	-1.47057	-1.42478	-1.32577	-1.43881
sp|B2RQC6|PYR1_MOUSE	61	AAFALGGLGSGFASTK;AIVHAVGQELQVTGPFNLQLIAK;APHVLVLGSGVYR;AQGLPVTC[+57.0214635]EVAPHHLFLNR;ASDPGLPAEEPK;C[+57.0214635]GPKPPPGFPGLETMLPLLLTAVSEGR;C[+57.0214635]LC[+57.0214635]QLGAEVTVVPWDHELDSQK;DQMSHLFNVAHTLR;EAAAGNIGGQTVR;EELGTVNGMTITMVGDLK;EELSALVAPAFAHTSQVLIDK;EIEYEVVR;ELSDLESAR;FGSVQEYEAC[+57.0214635]FGQFILTPHIMTR;FLSSAAAVSK;GEVAYIDGQVLVPPGYGQDVR;GHNQPC[+57.0214635]LLVGTGR;GIPGLQGVDTR;GTEPSALPFV…		7.65966	7.6967	7.80133	7.53001	7.52211	7.49647	7.0474	7.05726	7.04171	7.56454	7.56881	7.67947	7.41996	7.1964	7.09164	6.88625	7.05577	6.89709	7.45599	7.54097	7.57221	7.39047	7.57839	7.49219	6.94286	7.17676	7.11132
sp|P07901|HS90A_MOUSE	32	APFDLFENR;APFDLFENRK;AQALRDNSTMGYMAAK;DLVILLYETALLSSGFSLEDPQTHANR;DNSTMGYMAAK;DNSTMGYMAAKK;DQVANSAFVER;ELHINLIPSK;ELHINLIPSKQDR;ELISNSSDALDK;ELISNSSDALDKIR;ESDDKPEIEDVGSDEEEEEKK;HGLEVIYMIEPIDEYC[+57.0214635]VQQLK;HIYFITGETKDQVANSAFVER;HLEINPDHSIIETLR;HSQFIGYPITLFVEK;KHGLEVIYMIEPIDEYC[+57.0214635]VQQLK;KHLEINPDHSIIETLR;LGIHEDSQNR;LGIHEDSQNRK;LVTSPC[+57.0214635]C[+57.0214635]IVTSTYGWTANMER;NIKLGIHE…		10.3497	10.3206	10.332	9.07341	8.86483	8.92842	8.1944	8.21058	8.11113	10.3086	10.3621	10.4626	8.91367	8.72964	8.7482	8.31989	8.373	8.27156	10.3465	10.3531	10.3034	9.02776	8.87306	8.99295	8.15495	8.20853	8.20265
sp|Q99KK2|NEUA_MOUSE	5	AALDAGVFQSVWVSTDHDEIENVAK;EVAYLGNEVSDEEC[+57.0214635]LKR;GLEKPPHLAALVLAR;VAEMIREEGYDSVFSVVR;VGLSAVPADAC[+57.0214635]SGAQK		0.491437	0.324519	0.703833	-0.174616	0.0349508	-0.111478	0.104761	-0.159083	0.185212	0.256695	-0.0359807	-0.541881	0.096892	0.347306	0.563286	-0.162042	-0.624914	-0.507326	0.0519939	0.196915	0.823701	-0.3063	0.427763	0.500336	-0.342504	-0.403994	-0.484679
sp|Q91W43|GCSP_MOUSE	17	AGHQLQHDLFFDTLK;C[+57.0214635]HPQTIAVVQTR;DISLVHSMIPLGSC[+57.0214635]TMK;DVC[+57.0214635]GVLFQYPDTEGKVEDFTELVDR;EATEIAILNANYMAK;EMLQALGLASIDELIEK;EVAAFPLPFVKPENK;FC[+57.0214635]DAMISIR;FGVPLGYGGPHAAFFAVK;LNSSSELAPITWR;MEDPIC[+57.0214635]ENEILETLHAIASK;NLLENSGWVTQYTPYQPEVSQGR;SAHGTNPASAHMAGMK;SANVEAVDVAK;TFC[+57.0214635]IPHGGGGPGMGPIGVK;TSPFLTHQVFNSYHSETNLVR;VHNATLILSEGLK		4.09787	4.03344	4.25298	2.71728	2.81513	2.53048	0.913738	0.650279	0.932008	3.76437	3.72162	3.76237	2.75959	2.65274	2.63288	0.655248	0.94778	0.724922	3.19928	3.43096	3.54151	2.57627	2.76453	2.63696	0.662945	0.948167	0.875375
sp|O08795-2|GLU2B_MOUSE;sp|O08795|GLU2B_MOUSE	11	AAKEEAERPEK;EKESLQQLAEVTR;ESLQQLAEVTR;ETVVTSTTEPSR;HGGSPTSLGTWGSWAGPDHDK;HGGSPTSLGTWGSWAGPDHDKFSAMK;KLWEEQQAAAK;LLELQAGKK;LWEEQQAAAK;SLEDQVETLR;YEQGTGC[+57.0214635]WQGPNR		4.09157	4.00065	4.09218	4.60073	4.41094	4.44527	4.97828	4.95205	4.90624	4.15149	4.19516	4.39378	4.8513	4.65458	4.94441	5.70962	5.9422	5.62823	4.32891	4.24621	4.30559	4.69678	4.67069	5.03207	5.11169	4.9852	4.86714
sp|Q8C2Q3|RBM14_MOUSE	16	AAIAQLNGK;AAQMHSGYQR;AIEALHGHELRPGR;AQPSVSLGAAYR;AQPSVSLGAPYR;ASYDDPYKK;ASYVAPLTAQPATYR;DYAFVHMEK;IFVGNVSAAC[+57.0214635]TSQELR;KGPALAIQSGDK;LAELSDYR;RLPDAHSDYAR;TQPMAAQAASYR;TQSSASLAASYAAQQHPQAAASYR;VIEC[+57.0214635]DVVKDYAFVHMEK;YSGSYNDYLR		5.45614	5.51467	5.55372	4.7848	4.94853	4.97592	4.77392	4.77018	4.64949	5.35591	5.47933	5.67268	4.8033	4.80595	4.97864	5.0111	5.30541	4.89013	5.53523	5.64529	5.52388	4.87959	5.19211	5.40468	4.63127	4.67275	4.66726
sp|Q9DBS1|TMM43_MOUSE	8	FFLSAGLIDKIDNFK;ILYTLVDWFPVFR;LEDPHVDIIR;LLSDPNYGVHLPAVK;SGDTLLLLHHGDFSAEEVFR;TATSLAEGLSLVVSPDSIHSVAPENEGR;VSFSYAGLSSDDPDLGPAHVVTVIAR;YSYNTEWR		1.30812	-0.181477	1.43108	2.53179	2.30006	2.64329	2.80178	2.92256	3.03119	0.807382	1.20284	1.46762	2.81394	2.57179	2.55282	3.27498	3.73577	3.50525	-0.113653	1.25146	1.42579	2.52986	2.63907	2.90304	2.9782	3.07545	2.96519
sp|Q8K3Y3|LN28A_MOUSE	12	AADEPQLLHGAGIC[+57.0214635]K;AAEKAPEEAPPDAAR;AGVALDPPVDVFVHQSK;APEEAPPDAAR;AQQGPSSQGKPAYFR;C[+57.0214635]HFC[+57.0214635]QSINHMVASC[+57.0214635]PLK;C[+57.0214635]YNC[+57.0214635]GGLDHHAK;EEEEEIHSPALLPEAQN;EGEAVEFTFK;KC[+57.0214635]HFC[+57.0214635]QSINHMVASC[+57.0214635]PLK;MGFGFLSMTAR;VTGPGGVFC[+57.0214635]IGSER		5.5021	5.44601	5.58517	4.77208	4.69949	4.65159	4.05334	4.03669	4.16245	5.4042	5.39388	5.41354	4.73854	4.68364	4.77462	4.34813	4.45014	4.39668	5.28151	5.29521	5.34523	4.48907	4.59765	4.62392	4.13643	3.93965	3.65172
sp|Q9CR98|F136A_MOUSE	1	C[+57.0214635]SANC[+57.0214635]C[+57.0214635]EDTQASMQQVHQC[+57.0214635]IER		-3.2787	-3.5313	-3.35871	-4.48189	-5.14283	-5.47301	-4.65944	-5.89236	-4.57445	-3.75935	-5.24572	-7.58327	-5.29158	-4.89782	-4.07568	-5.46077	-7.08689	-5.59254	-4.23521	-4.21327	-3.74116	-5.5986	-5.30978	-4.97441	-6.04856	-5.84693	-6.06429
sp|Q9EQQ9-3|OGA_MOUSE;sp|Q9EQQ9|OGA_MOUSE	13	ANSSVVSVNC[+57.0214635]K;EIPVESIEEVSK;GVLTNPNC[+57.0214635]EFEANYVAIHTLATWYK;ISWIPFMQEK;KLDQVSQFGC[+57.0214635]R;LALTEWLQEFGVPHQYSSR;LLPGIEVLWTGPK;MAEELRPMDTDKESMAESK;SFALLFDDIDHNMC[+57.0214635]AADK;SFVQWLGC[+57.0214635]R;SHSSAQFLIGDQEPWAFR;SMMAC[+57.0214635]LLSSLK;TILYDMYSYVWDIK		2.60534	2.82232	2.8592	2.55726	2.66996	2.59973	2.30735	2.20615	2.45577	2.5345	2.45787	2.3867	2.72475	2.51426	2.2889	1.68303	1.78577	1.62126	2.26986	2.46423	2.58015	2.56668	2.6996	2.31902	1.85623	2.19112	2.3372
sp|P08003|PDIA4_MOUSE	29	DLGLSESGEDVNAAILDESGKK;EENGVWVLNDGNFDNFVADK;EFVTAFKK;FAMEPEEFDSDTLR;FAMEPEEFDSDTLREFVTAFK;FDVSGYPTIK;FDVSGYPTLK;FHHTFSPEIAK;FHVMDVQGSTEASAIK;FHVMDVQGSTEASAIKDYVVK;FIDEHATKR;GQAVDYDGSR;IASTLKDNDPPIAVAK;IDATSASMLASK;IDATSASMLASKFDVSGYPTIK;KGQAVDYDGSR;KGRPFDYNGPR;KLAPEYEK;MDATANDITNDQYK;QFAPEYEK;QLEPIYTSLGK;RFDVSGYPTLK;TFDAIVMDPK;TQEEIVAK;VDATEQTDLAK;VDATEQTDLAKR;VEGFPTIYFAPSGDKK;YGIVDYMIEQSGPPSK;YG…		6.21202	6.07122	6.1913	6.61192	6.37819	6.38427	6.58246	6.65389	6.50619	6.09367	6.21209	6.41977	6.52984	6.49259	6.68743	7.07716	7.26782	7.11791	6.1604	6.20128	6.06045	6.59189	6.51841	6.90255	6.71095	6.70321	6.6165
sp|O35654|DPOD2_MOUSE	7	FLGTSGQNVSDIFR;LVTGTVLAVLGSAK;TDPFIFPEC[+57.0214635]PHVYFC[+57.0214635]GNTPSFGSK;VILAGNLLSHNTQSR;VPVATYTNSSQPFR;YIHPDDELVLEDELQR;YSSMEDHLEILEWTLR		2.71159	2.95195	3.03484	2.00632	1.81157	2.06512	1.32721	1.41055	1.41703	2.74581	2.73051	2.8124	2.1361	1.72553	1.74844	0.997515	1.03817	0.822548	2.57444	2.66785	2.68932	1.83695	2.08583	1.9805	1.08188	1.56767	1.63962
sp|P52624|UPP1_MOUSE	12	AAVVC[+57.0214635]VTLLDR;AGPVLSVSHGMGIPSIGIMLHELIK;DLENHHNDC[+57.0214635]FIQLSNPNIAAMK;EDVLYHFNLSTSTHDFPAMFGDVK;EYPNIC[+57.0214635]AGTDR;FVC[+57.0214635]VGGSSSR;LDGALC[+57.0214635]SYTEK;LDGALC[+57.0214635]SYTEKDK;LQGDQINTPHDVLVEYQQRPQR;NIEMESSVFATMC[+57.0214635]SAC[+57.0214635]GLK;YVAAELGLDHPGK;YVAAELGLDHPGKEYPNIC[+57.0214635]AGTDR		6.09479	5.92474	6.08776	5.3126	5.28654	5.09668	3.88054	3.46645	3.91983	6.11536	5.98458	5.63192	5.32724	5.16512	5.27646	4.43546	3.86345	4.42889	6.29728	6.31191	6.51486	5.3639	5.60175	5.59372	4.50111	4.10998	3.79109
sp|P47226-2|TES_MOUSE;sp|P47226|TES_MOUSE	7	C[+57.0214635]AGC[+57.0214635]DELIFSNEYTQAENQNWHLK;EKQPVAGSEGAQYR;FMPVEGMVFC[+57.0214635]SVEC[+57.0214635]KR;HFC[+57.0214635]C[+57.0214635]FDC[+57.0214635]DHILAGK;NHAVVC[+57.0214635]QGC[+57.0214635]HNAIDPEVQR;NVMILTNPVAAK;QPVAGSEGAQYR		-1.92601	-1.51834	-1.00346	0.936285	0.98913	1.00565	1.03675	0.787234	0.994306	-1.22994	-1.45081	-3.18315	0.847149	0.719888	0.618815	0.556783	0.356679	0.273097	-3.11948	-1.27735	-1.67064	0.49159	1.01461	0.963162	0.847511	0.683076	0.753445
sp|Q9QYY0|GAB1_MOUSE	6	DASSQDC[+57.0214635]YDIPR;SPVETC[+57.0214635]GVPR;SSGSGSSMADER;SSGSGSSMADERVDYVVVDQQK;SSSLEGFHSQYK;VKPAPLDIKPLSEWEELQAPVR		1.24288	1.04701	1.2226	0.0323942	-0.42464	-0.323761	-0.620534	-0.41676	-0.569493	1.02698	1.00427	0.766385	0.0648337	-0.14081	-0.0330461	-0.0633291	0.00139422	-0.483244	1.35641	1.46862	1.51713	-0.513137	-0.392282	-0.0728734	-1.0972	-0.726214	-0.828198
sp|Q8CGF7-2|TCRG1_MOUSE;sp|Q8CGF7|TCRG1_MOUSE	17	AKPVATTPIPGTPWC[+57.0214635]VVWTGDER;EALFNEFVAAAR;EASEEPLPMETEEEDPKEEPVK;EEPKEEEMTEEEK;EEQELMEEMNEDEPIK;GGDGGEGERFNPGELR;LFNEHIEALTK;LIQESDQHLK;LIVAYVDDLDR;LIVAYVDDLDRR;SDFFELLSNHHLDSQSR;SSDVSWSDTR;SSDVSWSDTRR;TLESTWEKPQELKEK;VFFYNPTTR;WESGSLLER;YLVLDC[+57.0214635]VPEER		4.46988	4.43203	4.52174	3.94703	4.02174	3.67149	3.38542	3.38858	3.53823	4.25108	4.34756	4.34231	3.90109	3.85816	3.95442	3.67641	3.67004	3.53227	4.26098	4.20293	4.11089	3.91439	3.97785	3.89777	3.43405	3.52305	3.51102
sp|Q6ZQI3|MLEC_MOUSE	9	ASDYGMKLPILR;EEEEEEEEYDEGSNLK;EEEEEEEEYDEGSNLKR;FAEVYFAQSQQK;STPEDQILYQTER;VC[+57.0214635]ALYILAGTVDDVPK;VGHSTAHDEIIPMSIR;YNEETFGYEVPVK;YNEETFGYEVPVKEEGDYVLVLK		2.15043	2.21767	2.17659	2.89816	2.97649	2.92217	3.24595	3.14507	3.20637	2.17643	2.15488	2.09539	3.14788	2.88307	2.85265	3.80487	4.21065	3.79667	2.34998	2.44007	2.37856	2.93734	3.26576	3.1319	3.43833	3.33202	3.21717
sp|P25206|MCM3_MOUSE	38	AALLEVFQEAHEQSVGMLHLTESINR;AILC[+57.0214635]LLLGGVER;ASEDESDLEDEEEK;C[+57.0214635]SVLAAANPVYGR;DEENNPLETEYGLSVYK;DFVASIDATYAK;DGESYDPYDFSEAETQMPQVHTPK;DHQTITIQEMPEK;DHQTITIQEMPEKAPAGQLPR;DIQPAFSADDIAK;ELENGSHIR;ELISDNQYR;GC[+57.0214635]YTSGTFR;GDINILLIGDPSVAK;GSSGVGLTAAVTTDQETGER;GVVC[+57.0214635]IDEFDK;GVVC[+57.0214635]IDEFDKMSDMDR;HDSLLHGTK;IIKPTLTQESAAYIAEEYSR;KGC[+57.0214635]YTSGTFR;LEAGAMVLA…		7.33028	7.32354	7.34093	6.54762	6.61131	6.3906	6.18507	5.95046	6.11706	7.24765	7.13673	7.07548	6.62501	6.3857	6.45664	6.02399	5.96161	5.86561	7.08947	7.12538	7.23763	6.38855	6.65029	6.61627	6.11823	6.14718	6.00349
sp|Q61390|TCPW_MOUSE	2	DGNVLLHEMQIQHPTASIIAK;QVRDAYILTC[+57.0214635]NVSLEYEK		2.27658	1.80027	2.03249	0.758777	0.988514	1.38939	1.35062	1.00392	0.88614	2.14094	2.0049	2.38332	0.613211	1.07269	1.19362	1.41908	1.25341	1.0562	1.99454	1.99958	2.15013	0.948349	1.19972	1.30212	1.25625	0.881135	1.07828
sp|P80317|TCPZ_MOUSE	19	ALQFLEQVK;ALQFLEQVKVSK;AQAALAVNISAAR;AQLGVQAFADALLIIPK;DEPIDLFMVEIMEMK;DGNVLLHEMQIQHPTASLIAK;EMDRETLIDVAR;GIDPFSLDALAK;GIDPFSLDALAKEGIVALR;GPNKHTLTQIK;HKSETDTSLIR;IITEGFEAAK;IITEGFEAAKEK;NAIDDGC[+57.0214635]VVPGAGAVEVALAEALIK;RVENAYILTC[+57.0214635]NVSLEYEK;SETDTSLIR;TEVNSGFFYK;VC[+57.0214635]GDSDKGFVVINQK;VLAQNSGFDLQETLVK		7.06804	7.1471	7.10459	6.25712	6.27896	6.25681	5.92313	6.03409	5.95712	7.03386	7.12356	7.20768	6.17385	6.14837	6.28309	6.08707	6.18289	6.04154	7.14693	7.08027	7.14448	6.29246	6.23348	6.42153	5.95527	5.97739	5.98298
sp|P59328-3|WDHD1_MOUSE;sp|P59328|WDHD1_MOUSE	15	ADLSHKEEGDDDQAR;C[+57.0214635]VELADLMTQNAVHLAIK;DIFLASASC[+57.0214635]DGTVR;FMVWNSVGIIR;FTTNANHVVFNGAGNK;LHC[+57.0214635]LHFSSWDSSK;LNAGYSHTTTEWSRPR;LPYC[+57.0214635]QTSTEK;SDHYWVVGIHENPQQLR;SGAVFSSSQGWVNPFK;SPVIKPLTPKPR;SQILSDNPDISDETDIIK;SSSSDAPAVC[+57.0214635]LQNSENQRPK;VVDVMDNSQQQTFR;VVSEIC[+57.0214635]ETENQEETVK		2.81015	2.70032	2.85193	1.79488	1.47851	1.59374	0.587191	0.545797	0.472673	2.66365	2.64719	2.81957	1.65045	1.30729	1.18463	0.496297	0.539254	0.292379	2.72804	2.75173	2.6368	1.77983	1.64791	1.78583	0.561563	0.962087	0.987373
sp|Q91W90|TXND5_MOUSE	14	ALAPTWEQLALGLEHSETVK;DLDSLHSFVLR;EFPGLSDVTIAEVDC[+57.0214635]TAER;GTVLALTEK;GYPTLLLFR;GYPTLLWFR;LQPTWNDLGDKYNSMEDAK;NLAPTWEELSK;NLAPTWEELSKK;QGLYELSANNFELHVSQGNHFIK;SFEDTIAQGITFVK;VDC[+57.0214635]TADSDVC[+57.0214635]SAQGVR;VDC[+57.0214635]TQHYAVC[+57.0214635]SEHQVR;VYVAKVDC[+57.0214635]TADSDVC[+57.0214635]SAQGVR		2.75674	2.83266	2.94643	4.27396	4.21593	4.12486	4.83576	4.88994	4.87987	2.9828	2.94572	3.19004	4.65823	4.48393	4.43388	6.08601	6.4348	6.22137	2.89437	2.95609	2.99522	4.44883	4.48047	4.08455	4.8886	4.85143	4.9039
sp|P27773|PDIA3_MOUSE	37	ALEQFLQEYFDGNLK;ALEQFLQEYFDGNLKR;DGEEAGAYDGPR;DLFSDGHSEFLK;DLLTAYYDVDYEK;DLLTAYYDVDYEKNAK;EATNPPIIQEEKPK;ELNDFISYLQR;EYDDNGEGITIFRPLHLANK;EYDDNGEGITIFRPLHLANKFEDK;FAHTNIESLVK;FIQDSIFGLC[+57.0214635]PHMTEDNK;FIQDSIFGLC[+57.0214635]PHMTEDNKDLIQGK;FISDKDASVVGFFR;FLDAGHKLNFAVASR;FVMQEEFSR;FVMQEEFSRDGK;GFPTIYFSPANK;GFPTIYFSPANKK;IFRDGEEAGAYDGPR;KQAGPASVPLR;KTFSHELSDFGLESTTGEVPVVAIR;LAPEYEAAATR;LAPEYEA…		7.52816	7.47056	7.48608	8.05762	7.88723	7.88713	8.41746	8.45687	8.36994	7.58263	7.72063	7.9424	8.20503	8.10769	8.29324	9.5074	9.74818	9.48487	7.75929	7.74745	7.66443	8.1117	7.95301	8.25577	8.6585	8.40227	8.36773
sp|Q9WVL3|S12A7_MOUSE	3	DGIIPFLQVFGHGK;GLTIVGSVLEGTYLDK;LANYTNLSQGVVEHEEDEDSR		-1.23984	-1.03246	-0.910907	-0.574367	-0.274166	-0.339305	-0.69413	-0.403464	-0.159884	-1.14391	-0.735408	-0.671179	-0.380602	-0.550673	-0.727316	-0.462299	0.127242	-0.152192	-0.759138	-0.509228	-0.71422	-0.703141	-0.29214	-0.882491	-1.17697	-0.42187	-0.216569
sp|P62869|ELOB_MOUSE	3	ADDTFEALR;ESSTVFELK;TLGEC[+57.0214635]GFTSQTARPQAPATVGLAFR		2.4697	2.21781	2.23331	2.02101	1.517	1.5523	1.54329	1.69624	1.63179	2.13923	2.32388	2.09689	1.80216	1.76568	2.22361	1.997	2.08632	1.68883	2.67036	2.47745	2.38857	2.0372	1.63492	2.20762	1.9449	1.58004	1.5765
sp|A2ASQ1-2|AGRIN_MOUSE;sp|A2ASQ1-3|AGRIN_MOUSE;sp|A2ASQ1|AGRIN_MOUSE	30	ALETEGLLLYNGNAR;ASC[+57.0214635]YNSPLGC[+57.0214635]C[+57.0214635]SDGK;C[+57.0214635]EHPPPGPVC[+57.0214635]GSDGVTYLSAC[+57.0214635]ELR;C[+57.0214635]EPGFWNFR;DDC[+57.0214635]EQMTGLC[+57.0214635]SC[+57.0214635]RPGVAGPK;DQC[+57.0214635]PETC[+57.0214635]QFNSVC[+57.0214635]LSR;EAAC[+57.0214635]QQQVQIEEAR;EATYEC[+57.0214635]LC[+57.0214635]PGGFSGLHC[+57.0214635]EK;FDGPC[+57.0214635]DPC[+57.0214635]QGSM…		0.791093	0.600876	0.689349	3.70368	3.20406	3.41703	4.90623	4.94605	4.8439	0.659274	1.07107	0.945612	3.3833	3.45265	3.58251	4.78362	4.67513	4.62646	0.431339	1.24198	0.635894	3.28218	3.35363	3.70472	4.93547	4.92533	4.8071
sp|Q9CY58|PAIRB_MOUSE	15	EAGGGGVGGPGAK;EETQPPVALKK;EMTLDEWK;FDQLFDDESDPFEVLK;GGSGSHNWGTVK;GGSGSHNWGTVKDELTESPK;KEETQPPVALK;KPNEGADGQWK;KPNEGADGQWKK;RPDQQLQGDGK;SAAQAAAQTNSNAAGK;SAAQAAAQTNSNAAGKQLR;SEEAHAEDSVMDHHFR;SKSEEAHAEDSVMDHHFR;SSFSHYSGLK		5.89031	5.55596	5.50469	4.47071	4.13214	4.13897	3.77422	3.89513	3.75725	5.6314	5.9248	6.29555	4.20853	4.22451	4.41825	3.76527	3.47223	3.48396	6.16249	5.71996	5.66294	4.74616	3.95753	4.73409	3.82715	3.68173	3.84538
sp|Q9CX34|SGT1_MOUSE	14	ALEQNPDDAQYYC[+57.0214635]QR;C[+57.0214635]QEIQNGSESEVSASQR;DYASALETFAEGQK;GIC[+57.0214635]EYHEK;LDSTDTNFDTWIK;LDSTDTNFDTWIKR;LEGQGDEPTPK;LFQQIYSDGSDEVK;LFQQIYSDGSDEVKR;LLHPIIPEQSTFK;NMYPSSSHYTR;SFMESGGTVLSTNWSDVGK;SFMESGGTVLSTNWSDVGKR;SLELNPNNC[+57.0214635]TALLR		4.50806	4.32159	4.45222	2.6476	2.38227	2.2915	2.41497	2.24398	2.28062	4.33062	4.25472	4.32157	2.47118	2.40512	2.83652	2.59769	2.16622	2.26638	4.44032	4.32547	4.52673	2.59293	2.3997	2.70635	2.50476	2.20846	2.13535
sp|P10493|NID1_MOUSE	32	AEC[+57.0214635]LNPAQPGR;ASLHGGEPTTIIR;C[+57.0214635]EC[+57.0214635]VEGYHFSDR;C[+57.0214635]GNHAVC[+57.0214635]NNLPGTFR;C[+57.0214635]PDNTLGVDC[+57.0214635]IER;C[+57.0214635]PDNTLGVDC[+57.0214635]IERK;DESQVPAVVGFSK;DVDEC[+57.0214635]QHSR;DYATGFC[+57.0214635]C[+57.0214635]R;EDLSPFIIQMAAEYVQR;EYTVMEPDQDGAAPSHTHIYQWR;GNLYWTDWNRDNPK;HQC[+57.0214635]SVHAEC[+57.0214635]R;IETSHMDGTNR;KDESQVPAVVGFSK;KVLE…		1.98944	1.78005	1.72087	3.85182	3.37436	3.40187	5.93142	6.36029	5.48362	1.94969	1.82354	2.39555	4.49827	4.26816	4.47553	6.90047	6.87852	7.57724	2.54559	1.88271	1.88149	3.31733	3.54275	3.66906	6.06888	6.33584	5.54648
sp|P46460|NSF_MOUSE	14	AENSSLNLIGK;C[+57.0214635]PTDELSLSNC[+57.0214635]AVVNEK;FSNLVLQALLVLLK;FSNLVLQALLVLLKK;GSMAGSTGVHDTVVNQLLSK;LLDYVPIGPR;LQILHIHTAR;MEIGLPDEK;MGIGGLDKEFSDIFR;NFSGAELEGLVR;NIDSNPYDTDK;QSIINPDWNFEK;VLDDGELLVQQTK;YVGESEANIR		3.69162	3.72686	3.75864	3.72527	3.65076	3.82953	3.54297	3.58406	3.61138	3.90934	3.96364	4.10861	3.82066	3.70315	3.87045	3.76826	3.89211	3.76864	4.00134	4.04022	3.99647	4.02431	3.95302	4.21687	3.85585	3.7422	3.71257
sp|O08784|TCOF_MOUSE	17	AALGQGVAPVHTQK;AGAVTSSASLSSPALAK;ASAAPAKDPPAR;ATPRPTPVNSATAALPSK;EASSGSTPQKPK;ELLPLIYHHLLQAGYVR;GTPASATGASTSSHC[+57.0214635]K;KGTPASATGASTSSHC[+57.0214635]K;LESGEQSDPK;LGNVAPTPAKPAR;SFLTQPVTLLDIYTHWQQTSELGQK;SQHAADTALPK;SSQVRPVSTVTPGSSGK;STSSSPAPTQTLPNSITQR;TVNSVSHPGSGK;TVVHLLSGK;VLTELLEQER		4.26509	4.32635	4.41058	3.02727	3.06532	2.95747	2.03409	2.24326	2.05807	4.22359	4.45628	4.64655	3.02778	2.92924	2.85409	2.30317	2.7195	2.07383	4.21832	4.45047	4.27582	2.99318	3.04548	3.33715	1.81281	2.0878	2.37937
sp|P11031|TCP4_MOUSE	11	DDNMFQIGK;ELVSSSSSGSDSDSEVEK;EQISDIDDAVR;EQISDIDDAVRK;EYWMDSEGEMKPGR;EYWMDSEGEMKPGRK;GISLNMEQWSQLK;GISLNMEQWSQLKEQISDIDDAVR;QAVPEKPVK;QAVPEKPVKK;QSSSSRDDNMFQIGK		6.37462	6.27745	6.31355	5.70308	5.46525	5.43882	5.19449	5.37137	5.16233	6.28791	6.45749	6.67186	5.64441	5.49341	5.66647	5.37666	5.17646	5.44725	6.49675	6.4401	6.38764	5.64701	5.48718	5.84285	5.15171	5.21409	5.22508
sp|Q9Z2L7|CRLF3_MOUSE	7	EGEIAILGGIEEESDKLWNFTK;ENVEAAQSYR;GAMEPEPEVLLQEAR;LIEHGVNTADDLVR;LVTLLQEVDTIEQETIKPLDDC[+57.0214635]QK;QNGYESLQR;VDDDFTAQDYR		2.33752	2.14992	2.38316	1.44337	0.997248	1.05328	0.766919	0.77285	0.484281	2.14521	2.30873	2.39735	1.20908	0.937709	0.905224	0.630851	0.697533	0.640864	2.1734	2.1882	2.16989	1.22841	0.955173	1.25338	0.546622	0.804173	0.716047
sp|O70378|EMC8_MOUSE	6	DASPNQVAEK;DNSYVIAGYYQANER;FTMDC[+57.0214635]AAPTIHVYEQHENR;IAEGFGDAALIMVDNAK;SYETLVDFDNHLDDIR;VKDASPNQVAEK		1.2597	1.2219	1.28315	0.295801	0.0560794	-0.0917604	0.00364598	0.363783	0.21995	1.29451	1.34363	1.33321	0.102016	0.316243	0.44587	0.200362	0.328561	0.257444	1.57673	1.48317	1.53847	0.689265	0.281473	0.538368	0.447286	0.515882	0.317197
sp|Q00PI9|HNRL2_MOUSE	22	AVEEQGDDQDSEK;C[+57.0214635]DYMDEVTYGELEK;C[+57.0214635]DYMDEVTYGELEKEEAQPIVTK;DLLVQQASQC[+57.0214635]LSK;DWQNYYYHHQQDR;EEPFFPPPEEFVFIHAVPVEER;EGC[+57.0214635]TEVSLLR;EVEGDDVPESIMLEMK;FPTLWSGAR;GLEEPEMDPK;KVVVVVPNEEDWK;LQEALDAEMLEDEAGVGGAGPGGAC[+57.0214635]K;NFILDQC[+57.0214635]NVYNSGQR;NGEDLGVAFR;NYYGYQGYR;SGDETPGSEAPGDK;SGDETPGSEAPGDKAVEEQGDDQDSEK;TIEEC[+57.0214635]EVILMVGLPGSGK;VTQNLPMKEGC[+57…		5.1834	5.08484	5.15788	4.95787	4.88477	4.82305	4.74575	4.83019	4.76731	5.07517	5.14148	5.0965	4.97078	4.82326	4.94071	4.78629	4.74538	4.78503	5.16598	5.21368	5.13982	4.83363	4.94044	5.03625	4.81805	4.87019	4.68839
sp|O54988-2|SLK_MOUSE;sp|O54988|SLK_MOUSE	10	AGNILFTLDGDIK;ALGSEGEAAATEVDLER;DLQLQC[+57.0214635]EANVR;EADFQAVDNEVGLTK;ILNEKPTTDGPEK;IVTDSDSKTEELR;LIQSEEINDTHIQTMDLVSQETGEK;MTGESEC[+57.0214635]LNPSAQSR;QTLEALNYLHDNK;SSEVGTDEALDDTQK		-0.128437	-0.25138	-0.125806	0.0295893	-0.280518	-0.252792	0.119263	-0.097835	-0.109455	-0.384787	-0.202154	-0.098223	0.04262	-0.0462709	0.0550878	0.201096	-0.0412393	-0.365433	0.273989	0.218915	0.0398256	0.18313	-0.0601271	0.693956	0.187899	0.089586	0.145877
sp|Q9D287|SPF27_MOUSE	5	EAAAALVEEETRR;EMESNWVSLVSK;HIQDLNWQR;IENLELMSQHGC[+57.0214635]NAWK;NDITAWQEC[+57.0214635]VNNSMAQLEHQAVR		-1.80295	-2.1627	-0.77578	-2.65319	-2.72662	-2.67903	-2.67429	-1.93293	-1.70171	-1.76061	-1.72183	-0.367221	-1.39553	-1.91144	-1.32086	-1.22789	-0.010056	-1.97916	-1.93181	-2.20368	-1.0388	-1.89582	-0.348401	-1.70763	-1.75762	-1.72817	-1.69961
sp|Q8BHD7-2|PTBP3_MOUSE;sp|Q8BHD7|PTBP3_MOUSE	4	ENALVQMADASQAQLAMNHLSGQR;MALDGQNIYNAC[+57.0214635]C[+57.0214635]TLR;NNQFQALLQYADPVNAQYAK;SQPVYIQYSNHR		3.55133	3.70188	3.76903	2.66905	3.95079	2.4334	2.45202	1.95117	3.0312	2.72065	1.48048	0.502609	2.8882	3.05225	4.18359	2.39104	1.74908	1.89756	1.42577	1.49598	2.69147	1.93069	3.32894	2.48451	2.1317	1.87087	1.674
sp|Q5XG69|F169A_MOUSE	5	DAFASTSEGPEK;DAFASTSEGPEKTPVSTR;HFQDSEFSSSQGEDENVAK;SQSEEQSEASSEHLEQFTQSAEK;TLLGSSDNVATVSNIEK		3.50011	3.26412	3.15499	1.97244	1.50617	1.60325	1.21863	1.36877	1.19916	3.50038	3.75637	3.92771	1.88381	1.85	1.97084	1.69895	1.7617	1.49068	4.14136	3.93084	3.64149	2.07149	1.72606	2.48397	1.58493	1.46455	1.24786
sp|Q64674|SPEE_MOUSE	16	AAFVLPEFTR;DEFSYQEMIANLPLC[+57.0214635]SHPNPR;EDGILC[+57.0214635]C[+57.0214635]QGEC[+57.0214635]QWLHLDLIK;EPVQQLTQAQVEQMQLK;ESYYQLMK;ETC[+57.0214635]SLWPGQALSLQVEQLLHHR;FLPGMAVGFSSSK;HPSVESVVQC[+57.0214635]EIDEDVIEVSK;HPSVESVVQC[+57.0214635]EIDEDVIEVSKK;LTLHVGDGFEFMK;NPSTNFREPVQQLTQAQVEQMQLK;TALKEDGILC[+57.0214635]C[+57.0214635]QGEC[+57.0214635]QWLHLDLIK;TYGNVLVLDGVIQC[+57.0214635]TER;VLIIGGGDGGV…		6.73099	6.75236	6.7499	5.04679	5.0389	5.0446	4.75432	4.78575	4.66082	6.77436	6.75094	6.85608	5.12235	5.01943	4.99226	5.44102	5.6002	5.55794	6.71285	6.74223	6.75805	4.99738	5.07702	4.84994	4.7781	4.74397	4.67378
sp|Q8BHB4|WDR3_MOUSE	17	DAVTQALFLR;EC[+57.0214635]PGIQDTPESEDSTLEADDEKSEDR;EVPLPVNPILMAHGNISPSAYVLETFK;FWDFELVTDK;IFSLLSGEGNITFNGHK;IWGLDFGDC[+57.0214635]HR;LITGAADSELR;LLAVSLLDC[+57.0214635]TVK;LPVLC[+57.0214635]MDISHDGALIATGSADR;QEVTC[+57.0214635]LC[+57.0214635]PSPDGLHLAVGYEDGAIR;QVQDAIGFNMAGLDYLK;SEVMFFAEATSHLEEK;SFDLIHSPQGELK;SLFAHDDSVMYLR;WWDLDNQHC[+57.0214635]FK;YVASAVFGLIGSQK;YVAVPAC[+57.0214635]EHVFIWDLR		4.00999	4.15048	4.24697	2.77154	2.91746	2.92735	1.97645	2.10662	2.1612	4.08037	4.01243	4.07104	2.91763	2.79715	2.6907	2.10667	2.39767	2.19501	3.87204	3.96691	4.10631	2.66153	3.00669	2.83777	2.06386	2.21438	2.08659
sp|Q91YQ5|RPN1_MOUSE	28	APDELHYTYLDTFGRPVIVAYK;ASSFVLALEPELESR;AVTSEIAVLQSR;DIPAYSQDTFK;DISTLNSGKK;DTYLENEKLSSGK;FPLFGGWK;FVDHVFDEQVIDSLTVK;GEDEEDNNLEVR;HFDETVNR;ISVVVETVYTHVLHPYPTQITQSEK;LKTEGSDLC[+57.0214635]DR;LPVALDPGSK;NIQVDSPYDISR;NLVEQHIQDIVVHYTFNK;QFVVFEGNHYFYSPYPTK;QPDSGISSIR;SEDVLDYGPFK;SEDVLDYGPFKDIPAYSQDTFK;SLETEHKAVTSEIAVLQSR;TEGSDLC[+57.0214635]DR;THYIVGYNLPSYEYLYNLGDQYALK;TILPAAAQDVYYR;TVDLSSHLAK;VAC[+57.…		6.07193	6.04222	6.11331	6.84333	6.69243	6.70598	6.97913	6.96469	6.91885	6.10482	6.12989	6.35157	7.01903	6.7997	6.85461	7.47593	7.60224	7.61634	6.14157	6.18084	6.14559	6.84384	6.85738	6.84894	7.17304	7.05099	6.89305
sp|Q8BKS9|PUM3_MOUSE	14	DPAHTVPELIELLQK;EAVVYLAHTHDGAR;ELLESISPALLSYLQGHTQEVVLDK;FLMYGSKPQVAEIIR;GAIILSSLLQSC[+57.0214635]DQEVVNK;HSEASAIVEYAYNDK;KFQPDGESDESGAK;LELIMDEMK;NMLTEELYGNTFQLYK;QAFQELQGDLVELSK;QIIISEIISSLPSIVNDK;VANGQYSHLVLLAAFDC[+57.0214635]IDDTK;VFLDFFTYAPPKPR;VLELQPAKLELIMDEMK		3.11391	2.968	3.07979	1.48887	1.88544	1.72161	1.29005	1.31104	1.47743	3.10527	3.07242	3.31428	1.5388	1.8933	1.59174	1.36035	1.171	1.6245	3.05697	2.90029	3.02246	1.80489	1.86312	1.59243	1.38871	1.49768	1.62528
sp|Q8CDN6|TXNL1_MOUSE	12	AGC[+57.0214635]EC[+57.0214635]LNESDEHGFDNC[+57.0214635]LR;AGC[+57.0214635]EC[+57.0214635]LNESDEHGFDNC[+57.0214635]LRK;FQGPDNGQGPK;GYMDLMPFINK;IAPAFSSMSNK;IDQYQGADAVGLEEK;ISYFTFIGTPVQATNMNDFK;ISYFTFIGTPVQATNMNDFKR;MVGVKPVGSDPDFQPELSGAGSR;QHLENDPGSNEDADIPK;SMDFEEAER;VRIDQYQGADAVGLEEK		5.04582	4.95542	5.11539	4.81453	4.61577	4.76466	4.6891	4.72768	4.62787	4.94723	4.95924	5.2193	4.80795	4.49256	4.61119	4.89571	5.11621	4.91225	4.97974	5.05837	4.99425	4.57879	4.64137	4.88892	4.51923	4.54071	4.59072
sp|Q8R0G9|NU133_MOUSE	29	AHC[+57.0214635]LLVDFLHQVGLFR;AHTTLLGLANMETR;AQIMADELFSSHTDLDSDPELDK;DDWSGSDGKDDPIEVSK;DGIQLSEYLPEVTDLLR;EC[+57.0214635]EVPNSLTPADVFFR;EDTYSDTC[+57.0214635]VDLGGEK;EGVNIQYLDLK;ENVSLLAEDLEESLTSSVGGR;ESITDAVWGSESNYEAIK;EVSQVDTIC[+57.0214635]EC[+57.0214635]LLEHEEQVLR;FLLHQETLPEQLLTER;GGSSFYTLTSSNISK;GLSLGSAVNSPVLFSPAGR;GPLVGIGPTSTPR;GSESMVFETTTK;IEAMAEQER;IHQHVLPQGQGMLSGIGR;LAALASDISEDR;LAALASDISEDR…		5.27391	5.19134	5.30339	4.97311	4.84043	4.8738	4.62165	4.58877	4.62458	5.22562	5.29209	5.37618	4.97693	4.82129	4.87039	4.71209	4.78868	4.70315	5.28068	5.32733	5.30273	5.02313	5.05145	5.22476	4.80625	4.74562	4.67648
sp|Q9EQU5|SET_MOUSE	1	GEKEQQEAIEHIDEVQNEIDR		1.04888	0.33274	0.657714	-0.991456	-1.69205	-1.37715	-2.02192	-2.25681	-2.19695	0.313561	0.873834	1.27274	-1.41491	-1.20794	-0.523878	-2.13053	-2.72399	-2.50399	0.874593	0.603015	0.361148	-1.10124	-1.95724	-0.696395	-1.80696	-2.3781	-2.35049
sp|P49717|MCM4_MOUSE	30	AEINILLC[+57.0214635]GDPGTSK;AGIIC[+57.0214635]QLNAR;ALADDDFLTVTGK;DYIAYAHSTIMPR;ENFQRFLQC[+57.0214635]FTDPLAK;FDLIFLMLDPQDEAYDRR;FLQC[+57.0214635]FTDPLAK;FSNKVEAIDVEEAK;GILLQLFGGTR;GILLQLFGGTRK;GSSAVGLTAYVMK;GSSAVGLTAYVMKDPETR;IAEPC[+57.0214635]SC[+57.0214635]VHC[+57.0214635]HTTHSMALIHNR;KTTIENIQLPHTLLSR;LASALAPSIYEHEDIKK;LHGLDEEAEQK;LSEEASQALIEAYVNMR;LSEEASQALIEAYVNMRK;LVIWGTDVNVATC[+57.0214635…		6.55023	6.56724	6.5601	5.94477	5.86654	5.81111	5.52923	5.35648	5.44434	6.54505	6.39985	6.4458	5.92722	5.71471	5.63895	5.40189	5.32485	5.26823	6.33651	6.38353	6.45185	5.86666	5.91996	5.76577	5.42823	5.45504	5.50937
sp|P54071|IDHP_MOUSE	20	C[+57.0214635]ATITPDEAR;C[+57.0214635]ATITPDEARVEEFK;DIFQEIFDK;DLAGC[+57.0214635]IHGLSNVK;DQTNDQVTIDSALATQK;FKDIFQEIFDK;GKLDGNQDLIR;IKVEKPVVEMDGDEMTR;LDGNQDLIR;LIDDMVAQVLK;LILPHVDVQLK;LNEHFLNTTDFLDTIK;LVPGWTKPITIGR;NILGGTVFREPIIC[+57.0214635]K;SSGGFVWAC[+57.0214635]K;TIEAEAAHGTVTR;VC[+57.0214635]VQTVESGAMTK;VEKPVVEMDGDEMTR;YFDLGLPNR;YFDLGLPNRDQTNDQVTIDSALATQK		3.52997	3.6316	3.76285	5.07724	5.18382	4.93978	5.77646	5.83526	5.8025	3.90184	3.77312	4.01276	5.37274	5.20704	5.39408	6.12855	6.31134	6.10581	3.87518	3.89468	4.06969	5.07789	5.39571	5.26714	5.70443	5.82695	5.77041
sp|P14733|LMNB1_MOUSE	46	AEHDQLLLNYAK;AGQTVTVWAANAGVTASPPTDLIWK;ALYETELADAR;ALYETELADARR;ASAPATPLSPTR;C[+57.0214635]QSLTEDLEFR;C[+57.0214635]QSLTEDLEFRK;DAALATALGDK;DAALATALGDKK;DQMQQQLSDYEQLLDVK;EELEQTYHAK;EMAEIRDQMQQQLSDYEQLLDVK;ESDLSGAQIK;EYEAALNSK;FKAEHDQLLLNYAK;IESLSSQLSNLQK;IESLSSQLSNLQKESR;IGDTSVSYK;IGDTSVSYKYTSR;IQELEDMLAK;IQELEDMLAKER;KESDLSGAQIK;KIGDTSVSYK;KNMYEEEINETR;KQLADETLLK;LAQALHEMR;LAQALHEMREQHDAQVR;LAV…		8.07432	8.02653	8.0629	7.61659	7.44202	7.48678	7.43013	7.43098	7.28157	7.9496	8.0503	8.21899	7.57452	7.44915	7.5046	7.47201	7.73177	7.39101	8.01622	8.13804	7.98017	7.54392	7.58241	7.85446	7.3307	7.4361	7.48577
sp|P70460|VASP_MOUSE	7	ATQVGEKPPKDESASEESEAR;ATVMLYDDSNKR;MQPDQQVVINC[+57.0214635]AIIR;SSSSVTTSEAHPSTPC[+57.0214635]SSDDSDLER;STGGGLMEEMNAMLAR;VQIYHNPTANSFR;YNQATPIFHQWR		2.89441	2.7901	2.95196	2.36648	2.04643	2.02405	2.03695	1.93442	1.90201	2.71573	2.7226	2.97649	2.32499	2.02282	2.06839	2.60453	2.86801	2.49973	2.74948	2.9267	2.79156	2.00781	2.11242	2.06736	2.22374	1.9514	1.97793
sp|O08810|U5S1_MOUSE	33	AFIPAIDSFGFETDLR;C[+57.0214635]FAETPNKK;DSIVQGFQWGTR;EGPLC[+57.0214635]DELIR;FFDDPMLLELAK;GHVTQDAPIPGSPLYTIK;GLAEDIENEVVQITWNR;GLSEDVSISK;GNEEAQIFRPLK;IAVEPVNPSELPK;ILAQVVGDVDTSLPR;ILDAVVAQEPLHR;ISDGVVLFIDAAEGVMLNTER;ITMIAEPLEK;IYADTFGDINYQEFAK;IYADTFGDINYQEFAKR;LGEFFQTKYDWDLLAAR;LWGDIYFNPK;MYSTDDGVQFHAFGR;NVTLC[+57.0214635]GHLHHGK;RYDQDLC[+57.0214635]YTDILFTEQER;SFVEFILEPLYK;SIVIRPLEPQPAPHLAR;ST…		6.58211	6.70137	6.68118	6.22341	6.16935	6.13941	5.84258	5.97393	5.8724	6.60949	6.63948	6.70084	6.34637	6.15664	6.09246	5.90171	6.08062	5.9385	6.56506	6.673	6.67966	6.21766	6.35989	6.29355	5.7174	6.0042	6.02463
sp|Q62422|OSTF1_MOUSE	3	GYADIVQLLLAK;LGDTALHAAAWK;TGLIPSNYVAEQAESIDNPLHEAAK		0.19001	0.243835	0.508755	0.202826	0.340041	0.416682	0.590781	0.783091	0.950186	0.0361514	0.403881	0.515377	0.426584	0.491812	0.729086	1.72661	1.98298	1.9518	0.550485	0.504544	0.610946	0.562946	0.51365	0.804611	1.37465	0.97261	0.868909
sp|P11983|TCPA_MOUSE	35	AFHNEAQVNPER;AFHNEAQVNPERK;DDKHGSYENAVHSGALDD;DNKQAGVFEPTIVK;EVGDGTTSVVIIAAELLK;FATEAAITILR;GANDFMC[+57.0214635]DEMER;HGSYENAVHSGALDD;IAC[+57.0214635]LDFSLQK;IC[+57.0214635]DDELILIK;IC[+57.0214635]DDELILIKNTK;IHPTSVISGYR;IIGINGDYFANMVVDAVLAVK;IIGINGDYFANMVVDAVLAVKYTDAR;ILATGANVILTTGGIDDMYLK;LGVQVVITDPEK;LGVQVVITDPEKLDQIR;LLEVEHPAAK;MLVDDIGDVTITNDGATILK;QAGVFEPTIVK;SLHDALC[+57.0214635]VVK;SLLVIPNT…		7.62888	7.67457	7.60111	6.94643	6.89449	6.90681	6.44619	6.57609	6.55596	7.64304	7.6909	7.66395	6.80329	6.76568	6.74155	6.64748	6.62855	6.55225	7.78852	7.72773	7.71578	7.01864	6.77376	6.83628	6.53796	6.6172	6.5293
sp|Q8K3W0|BABA2_MOUSE	4	ELVQQYHQFQC[+57.0214635]GR;LPVDFSNIPTYLLK;SGC[+57.0214635]TSLTPGPNC[+57.0214635]DR;VGLDATNC[+57.0214635]LR		1.10672	1.22459	1.37395	1.02932	1.23331	0.972702	1.17797	1.12952	1.42187	0.925818	0.796539	0.68984	1.06877	1.0883	1.26832	0.975746	0.654356	0.90004	0.608763	0.96802	1.1188	0.739202	1.28825	1.37994	0.897894	0.915212	0.99471
sp|Q9Z247|FKBP9_MOUSE	10	DGNGEVLLEEFSEYIHAQVATGK;DIPGQASLVFDVALLDLHNPK;DSTFNVFVGK;GQLIAGMDQALVGMC[+57.0214635]VNER;IITVPPFLAYGEEGDGK;IVVPPHLGYGEK;LAPGFNAEMIVK;TIQVSDFVR;TYDTYVGIGWLIPGMDK;YHYVGTFLDGQK		2.72116	2.63183	2.68272	3.59441	3.41742	3.31227	4.23723	4.31621	4.17363	2.725	2.61134	2.87156	3.85725	3.64239	3.75521	5.45233	5.56087	5.57578	2.37607	2.40883	2.26974	3.37356	3.36734	3.47656	4.40684	4.13689	3.98598
sp|Q91WG4|ELP2_MOUSE	14	ALSLC[+57.0214635]GHEDWIR;DLFLASC[+57.0214635]SQDC[+57.0214635]LIR;FQFVSGADEK;GVEWATFGR;IHLYIQQDDQFQK;IIWSC[+57.0214635]DWSPDNK;LYMKPASFETK;NFVENFSVISR;QSLSHMLC[+57.0214635]DDQDLPEGATVPALGLSNK;TEDGSPSNELVSGGSDNR;TNQEINDWTSC[+57.0214635]VETNPSQSHSLGIR;VIHWELENNQVLK;VNC[+57.0214635]LQWIR;VVITNLNGHTAR		3.98134	3.9944	3.86943	3.32169	3.46667	3.08759	3.24486	3.09327	3.21305	3.82831	3.65041	3.5055	3.53815	3.25928	3.45315	2.62746	2.51817	2.54402	3.54357	3.5581	3.63871	3.14613	3.55833	3.29123	2.81982	3.14566	3.13372
sp|Q7TNC4-2|LC7L2_MOUSE;sp|Q7TNC4-3|LC7L2_MOUSE;sp|Q7TNC4-4|LC7L2_MOUSE;sp|Q7TNC4|LC7L2_MOUSE	7	AMLDQLMGTSR;EQDFFFELDAMDHLQSFIADC[+57.0214635]DR;LAETQEEISAEVAAK;LAETQEEISAEVAAKAER;SHLLNC[+57.0214635]C[+57.0214635]PHDVLSGTR;VEQLGAEGNVEESQK;VEQLGAEGNVEESQKVMDEVEK		3.32667	3.21879	3.30102	3.15205	3.18973	3.1016	3.01085	3.04445	3.07189	3.16212	3.13765	3.37213	3.13712	2.92897	3.19014	3.03496	3.31765	3.03011	3.21077	3.18956	3.1883	2.92037	3.10699	3.36477	2.7047	2.87644	2.97208
sp|Q9QZD9|EIF3I_MOUSE	18	DMTMFVTASK;DMTMFVTASKDNTAK;DPIVNVWYSVNGER;DPSQIDSNEPYMK;EGDLLFTVAK;EGDLLFTVAKDPIVNVWYSVNGER;GHFGPINSVAFHPDGK;HVLTGSADNSC[+57.0214635]R;ITSAVWGPLGEC[+57.0214635]VIAGHESGELNQYSAK;LFDSTTLEHQK;LGTYMGHTGAVWC[+57.0214635]VDADWDTK;MKPILLQGHER;QINDIQLSR;QMGYQC[+57.0214635]FVSFFDLR;SGEVLVNVK;SGEVLVNVKEHSR;SYSSGGEDGYVR;TC[+57.0214635]GFDFGGNIIMFSTDK		6.26115	6.18462	6.2651	5.71425	5.6032	5.61911	5.51163	5.44518	5.30692	6.11705	6.08684	6.16147	5.83612	5.5237	5.56241	5.52821	5.57811	5.48748	6.13458	6.14645	6.11307	5.59222	5.69506	5.74073	5.38985	5.3863	5.35306
sp|Q8C0J2-2|A16L1_MOUSE;sp|Q8C0J2-3|A16L1_MOUSE;sp|Q8C0J2-5|A16L1_MOUSE;sp|Q8C0J2|A16L1_MOUSE	5	QAFEEIILQYTK;RGELAQLVIDLNNQMQQK;SVSSIPVPQDIMDTHPASGK;TTEENQELVTR;VPTTASYVFDAHDGEVNAVQFSPGSR		-1.39712	-1.44551	-1.49602	-1.93021	-1.70935	-1.88519	-1.92967	-1.58294	-1.90939	-1.47	-1.03098	-1.18841	-2.05698	-1.70839	-1.8993	-1.68858	-1.20997	-1.67154	-1.4779	-1.01097	-1.30096	-1.99247	-1.66164	-1.46674	-2.34669	-2.11494	-2.12824
sp|Q9EQK5|MVP_MOUSE	12	ALQPLEEGEGEEK;AQQLADVEAK;DAQSSVLFDVTGQVR;DITPLQVVLPNTALHLK;ELPSGVEELLNLGHDPLADR;EVEVVEIIQATVIK;GIQDVYVLSEQQGLLLK;IPPYHYIHVLDQNSNVSR;LAQDPFPLYPGELLEK;QAIPLDQNEGIYVQDVK;VPHNAAVQVYDYR;VVFGPELVSLDPEEQFTVLSLSAGRPK		2.45233	2.18787	2.5823	2.71478	2.4285	2.51996	2.9399	3.05932	3.00889	1.9306	2.05727	2.4076	2.53746	2.53294	2.57375	3.33867	3.53441	3.47839	1.8173	2.01813	1.83608	2.27322	2.23914	2.33334	2.88201	2.76611	2.74091
sp|Q9JIW9|RALB_MOUSE	1	AEEWGVQYVETSAK		-2.15557	-2.48154	-2.68739	-0.99788	-1.50356	-1.41836	-0.486378	-0.720168	-0.814288	-2.3759	-2.16809	-2.40269	-0.827169	-1.01786	-0.945407	-0.182827	-0.999894	-0.42344	-2.48543	-2.57708	-2.20617	-0.881345	-1.1895	-0.875457	-0.211322	-0.695455	-0.904771
sp|P16858|G3P_MOUSE	23	AVGKVIPELNGK;DGRGAAQNIIPASTGAAK;GAAQNIIPASTGAAK;GAAQNIIPASTGAAKAVGK;IVSNASC[+57.0214635]TTNC[+57.0214635]LAPLAK;LEKPAKYDDIK;LISWYDNEYGYSNR;LTGMAFRVPTPNVSVVDLTC[+57.0214635]R;LVINGKPITIFQER;LVINGKPITIFQERDPTNIK;RVIISAPSADAPMFVMGVNHEK;TVDGPSGKLWR;VIHDNFGIVEGLMTTVHAITATQK;VIISAPSADAPMFVMGVNHEK;VIISAPSADAPMFVMGVNHEKYDNSLK;VIPELNGKLTGMAFR;VPTPNVSVVDLTC[+57.0214635]R;VPTPNVSVVDLTC[+57.0214635]RLEKPAK;V…		11.4389	11.4619	11.5417	10.9281	10.8833	10.8363	10.5758	10.4955	10.5553	11.3814	11.3124	11.3338	10.9408	10.7948	10.82	10.7266	10.9902	10.5424	11.2795	11.4408	11.478	10.7191	11.0303	10.8928	10.418	10.6287	10.4695
sp|Q9QYB1|CLIC4_MOUSE	7	AGSDGESIGNC[+57.0214635]PFSQR;DEFTNTC[+57.0214635]PSDK;DEFTNTC[+57.0214635]PSDKEVEIAYSDVAK;HPESNTAGMDIFAK;LDEYLNSPLPDEIDENSMEDIK;NSRPEANEALER;TDVNKIEEFLEEVLC[+57.0214635]PPK		2.27672	2.266	2.24469	3.16022	2.98251	3.00551	2.74434	2.75245	2.73601	2.19365	2.17106	1.84122	3.08653	2.98423	2.99832	3.20122	3.16009	3.09574	2.19747	2.07252	2.14802	3.14636	3.04189	3.00335	3.08115	2.90941	2.68015
sp|Q8R5K4-2|NOL6_MOUSE;sp|Q8R5K4|NOL6_MOUSE	13	ALYLAHLAYHLAQDPLFSSVR;ATEDPEVMELAFEGMDK;ATEDPEVMELAFEGMDKEK;EAVVWEAESLFEK;EAVVWEAESLFEKR;EILQDKDGLNQR;EISSTGEEALALAVR;LAEVLTQEHR;LLWGLEGLPLTVSAVQGAHPVLR;LQC[+57.0214635]C[+57.0214635]ATATHTDVLK;SPEGMVSLR;TEPPAEGLLQPVNLSR;TVFRPPFDMYDVLIHLTPR		2.58072	2.69244	2.83197	1.36818	1.2821	1.48266	0.761981	0.646579	0.927256	2.70822	2.65212	2.85527	1.57029	1.39141	1.01039	0.704905	0.639872	0.899144	2.63048	2.62402	2.62018	1.58468	1.51061	0.943196	0.856161	1.31406	1.31866
sp|Q62193|RFA2_MOUSE	3	AC[+57.0214635]PRPEGLNFQDLR;IDDMTAPPMDVR;QAVDFLC[+57.0214635]NEGHIYSTVDDDHFK		3.59337	3.73338	3.78023	3.17306	3.30124	3.0504	2.40674	2.45569	2.5141	3.53423	3.43831	3.78024	3.20471	3.07753	3.42086	2.3844	2.45616	2.17852	3.66385	3.63301	3.72533	3.19553	3.34508	3.45487	2.41375	2.48373	2.40513
sp|G5E870|TRIPC_MOUSE	42	ALTYMMEALPR;DDSLDLSPQGR;DIPVTIHNLEEYLR;EGIFAVDTMLK;EIIPTSEFINSK;ESTDDESNPLGR;FFNTHQLK;GEEVTLSNPK;GNAQNTDGAIWQWR;HLDQEQQLK;IDPLALVQAIER;IIEAAHQVGEDEISLSTLGR;IIYFADAELLKDVLK;IVVGALQMAEILMQK;LFLQFVTGSPR;LLDTNPEINQSDSQDSR;LPDYSSIDIMR;LQFYIGEHLLPYNMTVYQAVR;LSAQSNSNNIEPAR;LVDLPLGLPFYK;LVDNFQHEENLLQQVASK;MADPESNQETVNSSAAR;MNNC[+57.0214635]LSQMEQFPVK;NHAVSSHIASMLSSQDLK;NTAGAQPQDDSIGGR;QAESVMQDLGSSR;QETSL…		5.83911	5.85313	6.04282	4.74102	4.73979	4.72989	4.00363	4.09772	4.15553	5.98575	5.98606	6.14747	4.7674	4.60098	4.65494	4.17121	4.30169	4.12204	5.92002	6.07929	6.02613	4.64844	4.71458	4.75674	3.86072	3.93269	4.0416
sp|Q3UA37|QRIC1_MOUSE	7	EIQEAIAVANATTMH;EQMGQMLTR;LYDFYLFK;NAELEKDAQNR;VDDIFSDLYYVR;VGTASVLQPVK;VTPLGYVLPSHVTEEMLWEC[+57.0214635]K		2.76346	2.85299	2.97927	2.27881	2.43087	2.43945	1.96708	1.85095	2.03754	2.70912	2.67894	2.99863	2.43687	2.09663	2.09027	1.70639	1.89094	1.83772	2.70431	2.82605	2.8871	2.14764	2.41676	2.14596	1.65098	1.7432	1.90928
sp|Q7TMY8|HUWE1_MOUSE	56	AESPEEVAC[+57.0214635]R;AIAMSLGQDIPMDQR;AIQDPAFSDGIR;ALAELFGLLVK;DGGSGNSTIIVSR;DHVFEDSYR;DLSMSEEDQMMR;DQSAQC[+57.0214635]TVTK;DSAVAISGADSR;ELQLPSMSMLTSK;EMFNPMYALFR;EVIYDMLNALAAYHAPEEADK;EVLQNQLGIRPPTR;EYNLEQQR;FDMAENVVIVASQK;FLGDEQDQITFVTR;FLQFVTGTSK;FVESILSNNTTDDHC[+57.0214635]QEFVNQK;GEEEAGQEEGGSR;GLQSFVQC[+57.0214635]QPFER;GNDIPLALESTNTEK;GNDIPLALESTNTEKEASLDETK;GSGTASDDEFENLR;HADHSSLTLGSGSST…		5.39406	5.50682	5.56873	5.33543	5.32212	5.31581	5.325	5.24549	5.32092	5.35054	5.30631	5.43961	5.40084	5.19755	5.17904	5.38303	5.52714	5.28242	5.31085	5.41029	5.44406	5.20082	5.33447	5.23306	4.99674	5.07854	5.14115
sp|Q03173-3|ENAH_MOUSE;sp|Q03173-4|ENAH_MOUSE;sp|Q03173-6|ENAH_MOUSE	15	AAVMVYDDANKK;ADAGRGNGPLPLGGSGLMEEMSALLAR;APSTSTPEPTR;EDANVFASAMMHALEVLNSQEAGPTLPR;ERLEQEQLER;GSTIETEQKEDR;IQDHQVVINC[+57.0214635]AIPK;LEQEQLER;LKEELIDAIR;NEDAEPITAK;QNSQLPAQVQNGPSQEELEIQR;QVYGLNFGSK;VEDGSFPGGGNTGSVSLASSK;VHIYHHTGNNTFR;YNQATQTFHQWR		4.20297	3.91504	4.22227	2.55567	1.92827	2.08566	1.78234	1.75591	1.5638	3.97972	3.96233	4.30772	2.35196	2.07273	2.09297	1.87396	1.91252	1.81579	4.21514	4.26632	4.00166	2.36924	2.2223	2.54908	1.7299	1.96078	1.99416
sp|O35737|HNRH1_MOUSE	6	FFSDC[+57.0214635]KIQNGAQGIR;GLPWSC[+57.0214635]SADEVQR;SNNVEMDWVLK;VTGEADVEFATHEDAVAAMSK;YGDGGSTFQSTTGHC[+57.0214635]VHMR;YVELFLNSTAGASGGAYEHR		4.92633	4.91638	4.89547	4.99061	5.01646	4.61419	4.62228	4.5084	4.6047	4.79681	4.55414	4.36033	5.21602	4.88209	4.99592	4.55507	4.49669	4.34733	4.64673	4.57501	4.71445	4.82561	5.08749	4.93083	4.34264	4.53733	4.46807
sp|Q8BWY3|ERF1_MOUSE	16	FGATLEIVTDK;FGATLEIVTDKSQEGSQFVK;FHTEALTALLSDDSK;ILYLTPEQEK;ILYLTPEQEKDK;KVNIDFEPFKPINTSLYLC[+57.0214635]DNK;LSVLGAITSVQQR;SQEGSQFVK;TELSQSDMFDQR;VAETAVQLFISGDK;VNIDFEPFKPINTSLYLC[+57.0214635]DNK;VNVAGLVLAGSADFK;YC[+57.0214635]FGVEDTLK;YFDEISQDTGK;YFDEISQDTGKYC[+57.0214635]FGVEDTLK;YVLHC[+57.0214635]QGTEEEK		6.27234	6.11279	6.28534	5.31464	5.11951	5.18978	5.07388	5.09522	4.90077	6.26276	6.24855	6.41827	5.21229	5.12749	5.14802	5.19981	4.85369	5.31096	6.35553	6.24443	6.38435	5.26038	5.24867	5.45001	5.08723	5.00884	4.98739
sp|Q3UEB3-2|PUF60_MOUSE;sp|Q3UEB3-3|PUF60_MOUSE	16	AQSSQDAVSSMNLFDLGGQYLR;AVTPPMPLLTPATPGGLPPAAAVAAAAATAK;DIDDDLEGEVTEEC[+57.0214635]GK;DIDDDLEGEVTEEC[+57.0214635]GKFGAVNR;GYGFIEYEK;IYVASVHQDLSDDDIK;KQESTVMVLR;KVVAEVYDQER;LGLPPLTPEQQEALQK;QAFAPFGPIK;QGEEEDAEIIVK;QTIAHQQQQLTNLQMAAQR;SIDMSWDSVTMK;VGRPSNIGQAQPIIDQLAEEAR;VVAEVYDQER;VYVGSIYYELGEDTIR		5.46865	5.50511	5.76837	5.24632	5.07974	5.26671	4.94086	5.06288	5.03725	5.55091	5.55105	5.74352	5.09887	5.11118	5.25989	4.96372	5.28545	5.09949	5.61086	5.74465	5.62169	5.17281	5.16723	5.53696	4.67322	4.89809	5.035
sp|P11679|K2C8_MOUSE	32	AEAETMYQIK;AEAETMYQIKYEELQTLAGK;ASLEAAIADAEQR;ASLEAAIADAEQRGEMAIK;DGKLVSESSDVVSK;DVDEAYMNK;DVDEAYMNKVELESR;KDVDEAYMNK;LAELEAALQR;LALDIEITTYRK;LEAELGNMQGLVEDFK;LEGLTDEINFLR;LESGMQNMSIHTK;LEVDPNIQAVR;LKLEAELGNMQGLVEDFK;LLEGEESRLESGMQNMSIHTK;LQAEIEALK;LQAEIEALKGQR;LVSESSDVVSK;QIHEEEIR;SLDMDGIIAEVR;SNMDNMFESYINNLR;SNMDNMFESYINNLRR;SRAEAETMYQIK;TEISEMNR;TEMENEFVLIK;TEMENEFVLIKK;TKTEISEMNR;TQEKEQIK;VEL…		3.63236	3.49152	3.57381	6.9937	6.64059	6.60186	7.48991	7.85807	7.54275	2.03986	2.3486	2.25648	6.82269	6.72919	6.87256	7.73083	7.87529	7.69847	2.40654	2.34493	2.24814	7.28572	7.27368	7.42388	7.96386	7.77074	7.61933
sp|Q9ERU9|RBP2_MOUSE	57	ALGTNTSTAPNHTLR;ALSELAALC[+57.0214635]YLVAFQVPRPK;AWMWLASDFSDGDAK;C[+57.0214635]KFEEAQNILK;C[+57.0214635]VSC[+57.0214635]QNTNPTSNK;DGFSFC[+57.0214635]IPVSADGFK;DSLITPHVSHLSTPR;DVQEGRELLESFDSALQSVK;EGPYWNC[+57.0214635]NSC[+57.0214635]SFK;EGQWDC[+57.0214635]SLC[+57.0214635]FVR;EGQWEC[+57.0214635]SVC[+57.0214635]LVR;ELLESFDSALQSVK;EMTESFKK;ENSSTSYTFK;EYLESLQC[+57.0214635]LDSDK;FDAEISQWK;FGESTTGFNFSF…		5.72357	5.73407	5.79428	5.27426	5.186	5.13193	4.92924	4.89983	4.96276	5.66881	5.65369	5.66068	5.266	5.11975	5.17162	5.14961	5.2003	5.02572	5.65725	5.68018	5.71518	5.22592	5.28384	5.4088	4.93051	4.90332	4.90751
sp|P08030|APT_MOUSE	8	AELEIQKDALEPGQR;DISPLLKDPDSFR;GFLFGPSLAQELGVGC[+57.0214635]VLIR;GFLFGPSLAQELGVGC[+57.0214635]VLIRK;IDYIAGLDSR;LPGPTVSASYSLEYGK;SFPDFPIPGVLFR;VVIVDDLLATGGTMFAAC[+57.0214635]DLLHQLR		5.1439	5.3372	5.32838	4.9051	4.9573	4.94492	4.81121	4.92788	4.91941	5.13402	5.07197	5.18897	4.87967	4.72976	4.60014	5.03507	5.21681	4.96399	5.04629	5.18341	5.03829	4.48902	4.5477	4.45178	4.65006	4.85162	4.85297
sp|Q6P5E4|UGGG1_MOUSE	35	AIWAALQTQASSSAK;ANPGAWILR;AYNYVAQEVDGYHAFQTLTQIYNK;EGETYYDVVAVVDPVTR;ELGTLHTEETQEGSQK;ELGTLHTEETQEGSQKHEEL;EQLDPDELETITMHK;FLFVDADQIVR;FLSPLQQNLLK;HLVESTNEMAPLK;IEYQFFEDK;IIGPLEDNELFNQDDFHLLENIILK;ILAASGALSLVVMK;ILFLDVLFPLVVDK;ISMINNPSQEISDSSTPIFR;IVPEWQDYDQEIK;IYSHDGTDSPPDANDVVVILNNFK;LAPLLLVLTQLINMNLR;LGIEGLSLHNILK;LNIQPSETDYAVDIR;LSDMPLKSFYR;MDFILSHALYC[+57.0214635]R;QTC[+57.0214635]DLDTLESLLL…		3.82083	3.92728	3.99766	4.3666	4.42371	4.42606	4.80188	4.8286	4.8456	3.97953	3.98674	4.07482	4.66531	4.50501	4.48711	5.44881	5.58092	5.56844	3.89169	4.18435	4.07433	4.53411	4.48776	4.47224	4.91252	4.8748	4.86676
sp|P40142|TKT_MOUSE	27	C[+57.0214635]EAFGWHTIIVDGHSVEELC[+57.0214635]K;DDQVTVIGAGVTLHEALAAAESLK;EAWHGKPLPK;IIALDGDTKNSTFSELFK;ILATPPQEDAPSVDIANIR;ISSDLDGHPVPK;KILATPPQEDAPSVDIANIR;KISSDLDGHPVPK;LDNLVAIFDINR;LGHASDRIIALDGDTK;LGQSDPAPLQHQVDIYQK;LQALKDTANR;MFGIDKDAIVQAVK;MPTPPSYKVGDK;NMAEQIIQEIYSQVQSK;NMAEQIIQEIYSQVQSKK;NPHNDRFVLSK;NSTFSELFK;NSTFSELFKK;QAFTDVATGSLGQGLGAAC[+57.0214635]GMAYTGK;SKDDQVTVIGAGVTLHEALAAAESLK;SVP…		7.67937	7.73351	7.82275	7.14811	7.21538	7.27969	6.75703	6.89722	6.78923	7.69065	7.76809	7.88249	7.33984	7.24466	7.14222	7.10676	7.54834	7.20225	7.52228	7.71699	7.62554	7.15047	7.45789	7.2975	6.66627	6.93127	6.99902
sp|O08756|HCD2_MOUSE	10	EIQAALTLAK;GVIINTASVAAFEGQVGQAAYSASK;IHTLEDFQR;KLGESC[+57.0214635]IFAPANVTSEK;LGESC[+57.0214635]IFAPANVTSEK;LVAGEMGQNEPDQGGQR;NFLASQVPFPSR;VINVNLIGTFNVIR;VVTIAPGLFATPLLTTLPEK;VVTIAPGLFATPLLTTLPEKVR		3.79806	3.85062	3.90919	4.20725	4.20177	4.22888	4.33331	4.38586	4.35218	3.82614	3.83338	3.92003	4.30994	4.1197	4.11056	4.35917	4.47035	4.33909	3.66972	3.76161	3.74912	4.20986	4.17603	4.37817	4.16617	4.43885	4.44898
sp|Q64514-2|TPP2_MOUSE	35	AC[+57.0214635]VDSNENGDLSK;ADNIEVFAQGHGIIQVDK;ADVIPVHYYLIPPPTK;AMIEVINHK;ANNVDYTVHSVR;AYDYLIQNTSFANR;C[+57.0214635]DLVNYSYGEATHWPNSGR;DPVQVAAPSDHGVGIEPVFPENTENSEK;EELQSQVELLNSFEK;EKLPANQYTWSSR;FC[+57.0214635]SLPEKGTLIEAFPVLGGK;GAGPGC[+57.0214635]YLAGSLTLSK;GTLIEAFPVLGGK;GTQLMNGTSMSSPNAC[+57.0214635]GGIALVLSGLK;GVLIAVLDTGVDPGAPGMQVTTDGKPK;IC[+57.0214635]EVINEAVWK;IPANWTNPLGK;KADVIPVHYYLIPPPTK;KQEE…		4.95916	4.91106	5.05784	4.80342	4.83494	4.74366	4.58628	4.57244	4.60869	4.91437	4.77222	4.78891	4.91056	4.5986	4.80313	4.62217	4.69995	4.52069	4.74797	4.84039	4.9294	4.66564	4.91707	5.00358	4.29158	4.54081	4.56487
sp|P63028|TCTP_MOUSE	9	DLISHDELFSDIYK;DLISHDELFSDIYKIR;EDGVTPFMIFFK;EDGVTPFMIFFKDGLEMEK;EIADGLC[+57.0214635]LEVEGK;GKLEEQKPER;IREIADGLC[+57.0214635]LEVEGK;LEEQKPER;VKPFMTGAAEQIK		5.76065	5.65621	5.8236	5.37414	5.38544	5.21232	5.30215	4.87294	5.11898	5.8319	5.53729	5.81241	5.37875	5.23912	5.22747	5.70156	5.53292	5.2957	5.90444	5.7961	5.99483	5.34567	5.29308	5.24953	5.23528	4.92005	5.11527
sp|P47738|ALDH2_MOUSE	24	AAFQLGSPWR;AAFQLGSPWRR;ANDSKYGLAAAVFTK;DGMTIAKEEIFGPVMQILK;EAGFPPGVVNIVPGFGPTAGAAIASHEGVDK;EEIFGPVMQILK;ELGEYGLQAYTEVK;GYFIQPTVFGDVK;HEPVGVC[+57.0214635]GQIIPWNFPLLMQAWK;LGPALATGNVVVMK;LLC[+57.0214635]GGGAAADR;LLC[+57.0214635]GGGAAADRGYFIQPTVFGDVK;TEQGPQVDETQFK;TEQGPQVDETQFKK;TFPTVNPSTGEVIC[+57.0214635]QVAEGNKEDVDK;TFVQENVYDEFVER;TIPIDGDFFSYTR;TVTVKVPQK;VAEQTPLTALYVANLIK;VAFTGSTEVGHLIQVAAGSSNLK;V…		7.23161	7.27028	7.36316	7.13185	7.21073	7.15275	6.36266	6.31141	6.31654	7.19967	7.14813	7.38009	7.20325	7.04337	6.98897	5.91377	6.17987	6.01882	7.45801	7.61185	7.61093	7.3367	7.53639	7.62826	6.44887	6.58702	6.52492
sp|P84078|ARF1_MOUSE	4	DAVLLVFANKQDLPNAMNAAEITDK;MGNIFANLFK;MLAEDELRDAVLLVFANK;VNEAREELMR		2.5222	3.43371	2.91799	3.33573	3.80637	3.86313	3.41712	3.10929	3.32835	2.91305	2.94104	2.42733	4.08983	3.30871	2.32243	3.62432	5.17044	3.59968	2.48841	3.15985	2.66575	3.15185	3.83116	2.38469	2.33537	3.81508	3.963
sp|Q61555|FBN2_MOUSE	24	AGTC[+57.0214635]FSGLVNGR;AQC[+57.0214635]C[+57.0214635]C[+57.0214635]EPGR;ASQDQTMC[+57.0214635]MDVDEC[+57.0214635]ER;AWNKPC[+57.0214635]EPC[+57.0214635]PTPGTADFK;C[+57.0214635]AC[+57.0214635]VYGFTGPQC[+57.0214635]ER;C[+57.0214635]EC[+57.0214635]EMGFTPASDSR;C[+57.0214635]EC[+57.0214635]PMGYNLDYTGVR;C[+57.0214635]ELDAAC[+57.0214635]PR;C[+57.0214635]LC[+57.0214635]NEGYELTPDGK;C[+57.0214635]NC[+57.0…		-1.94181	-1.92418	-1.26509	1.86795	1.32202	1.45394	3.66565	3.62029	3.43844	-1.97316	-1.96028	-1.28732	0.6938	0.672272	0.778406	1.75749	1.21793	1.60953	-1.51028	-2.21945	-1.53311	0.0811701	1.05488	1.8187	2.92127	3.47497	3.32421
sp|Q91ZW3|SMCA5_MOUSE	26	C[+57.0214635]NTLITLIER;EIQEPDPTYEEK;ENMELEEKEK;ESEITDEDIDGILER;FEDSPSYVK;FITDNTVEER;FVFMLSTR;HGATHVFASK;IAFTEWIEPPKR;IDEAEPLNDEELEEK;IDEAEPLNDEELEEKEK;IGKDEMLQMIR;LDGQTPHDER;LGFDKENVYDELR;LLTQGFTNWNK;LLTQGFTNWNKR;NFTMDTESSVYNFEGEDYREK;QDSINAYNEPNSTK;QNLLSVGDYR;RTEQEEDEELLTESSK;SPDLPNAAQAQK;STLHNWMSEFK;STLHNWMSEFKK;TEQEEDEELLTESSK;TLQTISLLGYMK;VLDILEDYC[+57.0214635]MWR		5.59995	5.56174	5.51965	5.34531	5.18178	5.1338	4.62226	4.57185	4.61925	5.49198	5.5958	5.64048	5.15412	5.02958	5.10279	4.56028	4.52815	4.48046	5.67613	5.61918	5.55308	5.38558	5.11823	5.33731	4.67247	4.68092	4.61901
sp|Q9Z2X1-2|HNRPF_MOUSE;sp|Q9Z2X1|HNRPF_MOUSE	10	DLSYC[+57.0214635]LSGMYDHR;FMSVQRPGPYDRPGTAR;HSGPNSADSANDGFVR;ITGEAFVQFASQELAEK;ITGEAFVQFASQELAEKALGK;QSGEAFVELESEDDVK;VTGEADVEFATHEEAVAAMSK;YGDSEFTVQSTTGHC[+57.0214635]VHMR;YIEVFKSSQEEVR;YIGIVKQAGLDR		6.36463	6.29174	6.48229	5.66202	5.58601	5.25763	5.49765	5.55416	5.63081	6.27294	6.1713	6.52045	5.54626	5.70752	5.61751	5.60487	5.62096	5.79107	6.15499	6.30996	6.35563	5.57041	5.71847	5.90104	5.40185	5.54204	5.66822
sp|Q61687|ATRX_MOUSE	33	AATENSENDITMQSLPK;ALVDPGPDFVVC[+57.0214635]DEGHILK;DFVTDTDAEVLEHSGK;DTILAELLQIHK;EAIYNDVLTK;EMLC[+57.0214635]KPGVSSDGAEKPSVK;ENMNLSEAQVQALALSR;FGQTKPVYVYR;FLAQGTMEDKIYDR;GGGDGNVDDTGNNPSVSLK;GGSSDGTDRFPK;GMYQSVAGGMQPPPLQR;GVDC[+57.0214635]QEVSQEK;IC[+57.0214635]GSGLNSDMMENNKEEGASTSEK;IILTGTPLQNNLIEYHC[+57.0214635]MVNFIK;KLEESC[+57.0214635]SGSVSSTYSHSALSVPK;LDGSTNAQSR;LFQDFQMLSR;LIETTSNMNSSYIK;LVLD…		3.66971	3.62797	3.73355	3.32737	3.0153	3.16284	2.46614	2.51663	2.4351	3.78697	3.86935	4.05377	3.11328	2.82897	2.83876	2.36682	2.45797	2.37863	3.85695	3.95716	3.87618	3.0163	2.90941	3.18198	2.27669	2.55401	2.52786
sp|Q64521|GPDM_MOUSE	20	AIMNLDVEQYR;ANLLEIAPHLSAPLPIMLPLYK;EYAC[+57.0214635]TAVDMISR;FLYYEMGYK;LAFLNVQAAEEALPR;LVGAIVYYDGQHNDAR;LVQDYGLESEVAQHLAK;LVSEFPYIEAEVK;MNLAIALTAAR;MYDLVAGSQC[+57.0214635]LK;NGQVELHEFLQLMSAVQK;NHVVDISDSGLITIAGGK;NYLSSDVEVR;SMAEDTVDAAVK;TALVERDDFSSGTSSR;TVGLFLQGGKDWSPTLYIR;VIFFLPWEK;VLESINVQMDENTLHEILC[+57.0214635]EVDLNK;WWQLPYYWVGIK;YGAATANYMEVVSLLK		4.50377	4.62966	4.63412	4.12997	4.1711	4.14207	4.00331	4.01164	4.06369	4.62325	4.54224	4.71286	4.42662	4.19379	4.12055	4.50062	4.70708	4.63381	4.64517	4.64507	4.7177	4.4299	4.44005	4.24999	4.30634	4.24334	4.18948
sp|Q923D5|WBP11_MOUSE	8	ADDASAATIEK;AQLSQYFDAVK;ATATISAKPQITNPK;AVSILPLLGHGVPR;DMEKLDEMEFNPVQQPQLNEK;KPPGPPPGPPPPQVLQMYGR;MAGQEIPEEGR;SEDDSAVPVAK		3.31617	3.38715	3.39372	2.76231	2.8821	2.8363	2.35804	2.54412	2.38126	3.33334	3.44266	3.6307	2.92401	2.75194	2.8653	2.64665	3.09977	2.63797	3.44969	3.53392	3.46749	2.72059	2.96576	3.00699	2.14178	2.33478	2.36641
sp|Q9EPL8|IPO7_MOUSE	20	AC[+57.0214635]WVLHYFC[+57.0214635]EVK;AFAVGVQQVLLK;AIFQTIQNR;AVTAMGILNTIDTLLSVVEDHK;DGALHMIGSLAEILLK;DQMEYMLQNHVFPLFSSELGYMR;DVPNETLQVEEDDRPELPWWK;EATPGDIAPYTIPEEDR;ENIVEAIIHSPELIR;ETENDDLTNVIQK;EYNEFAEVFLK;FIQLLSDQSDQSVLIQK;GIDQC[+57.0214635]IPLFVEAALER;KVLTGVAGEDAEC[+57.0214635]HAAK;NPVWYQALTHGLNEEQR;QLQDIATLADQR;QLQDIATLADQRR;SDQNLQTALELTR;VLQQTLNYINQGVSHALTWK;VLTGVAGEDAEC[+57.0214635]HAAK		5.12109	5.2149	5.26797	4.24295	4.22747	4.36951	3.92002	4.06197	4.09579	5.27855	5.28331	5.29815	4.09404	4.03716	4.02337	4.08804	3.83658	4.14114	5.39405	5.31199	5.31559	4.37615	4.05418	4.17589	3.92881	4.00445	4.05108
sp|O70456|1433S_MOUSE	2	SAVEKGEELSC[+57.0214635]EER;TTFDEAMADLHTLSEDSYK		-1.47895	-1.37681	-1.3551	-4.77037	-3.41106	-3.30887	-6.10048	-5.88601	-5.57762	-2.21139	-1.64868	-1.07193	-8.58974	-3.78494	-2.90584	-7.0954	-6.66806	-7.40667	-0.640246	-1.22979	0.525872	-2.27476	-4.23638	-2.30658	-4.10622	-6.72809	-5.41408
sp|Q9DCD0|6PGD_MOUSE	17	AGQAVDDFIEK;C[+57.0214635]LSSLKEER;GILFVGSGVSGGEEGAR;HEEMAQAFEEWNK;HEMLPANLIQAQR;IISYAQGFMLLR;LVPLLDTGDIIIDGGNSEYR;LVPLLDTGDIIIDGGNSEYRDTTR;MVHNGIEYGDMQLIC[+57.0214635]EAYHLMK;NPELQNLLLDDFFK;SAVDNC[+57.0214635]QDSWR;TELDSFLIEITANILK;TVSKVDDFLANEAK;VDDFLANEAK;VGTGEPC[+57.0214635]C[+57.0214635]DWVGDEGAGHFVK;VVGAQSLKDMVSK;YGPSLMPGGNK		6.24268	6.20665	6.26603	6.14482	6.05801	6.05033	5.86044	5.92214	5.79113	6.11885	6.19905	6.36441	6.18212	6.03177	6.01616	6.0981	6.1203	6.15257	6.29637	6.2951	6.28949	6.25064	6.26881	6.39392	6.13	6.09939	6.10267
sp|O55029|COPB2_MOUSE	29	AMGDTEIKDGER;C[+57.0214635]IAVHPTQPFILTSSDDMLIK;DMGSC[+57.0214635]EIYPQTIQHNPNGR;DNNQFASASLDR;EAFVVEEWVK;FELALQLGELK;GSNNVALGYDEGSIIVK;GVNC[+57.0214635]IDYYSGGDKPYLISGADDR;HSEVQQANLK;IAYQLAVEAESEQK;IWHSSTYR;KNWVVTGADDMQIR;LESTLNYGMER;LGREEPAMSMDANGK;LNYYVGGEIVTIAHLDR;LPEAAFLAR;NNVAFMSYFLQGK;NWVVTGADDMQIR;QLAELAISK;QQALTVSTDPEHR;SFGSAQEFAWAHDSSEYAIR;SVNGLAFYDWENTELIR;TFEVC[+57.0214635]DLPVR;TGLWVG…		5.50908	5.45122	5.5425	5.98293	5.91878	5.93581	6.17502	6.13593	6.14451	5.4787	5.42	5.48492	6.21362	5.91972	6.04429	6.66328	6.77956	6.76212	5.37427	5.41217	5.50787	5.85791	6.03101	5.97839	6.05537	5.95521	5.9524
sp|Q99L28|RLP24_MOUSE	2	C[+57.0214635]YFC[+57.0214635]SGPIYPGHGMMFVR;ELTVDNSFEFEK		1.97794	1.96125	1.89211	0.558253	1.14173	0.307402	0.0388486	-0.145875	0.192078	1.84638	1.57686	1.06938	0.769664	0.871044	0.644008	0.0660395	-0.326224	-0.200482	1.83507	1.73592	1.80869	0.449116	0.951362	0.392778	-0.146879	0.0266248	-0.254027
sp|P60335|PCBP1_MOUSE	12	AITIAGVPQSVTEC[+57.0214635]VK;IANPVEGSSGR;IITLTGPTNAIFK;LEEDINSSMTNSTAASRPPVTLR;LVVPATQC[+57.0214635]GSLIGK;LVVPATQC[+57.0214635]GSLIGKGGC[+57.0214635]K;QGANINEIR;QGANINEIRQMSGAQIK;QQSHFAMMHGGTGFAGIDSSSPEVK;QVTITGSAASISLAQYLINAR;QVTITGSAASISLAQYLINARLSSEK;VMTIPYQPMPASSPVIC[+57.0214635]AGGQDR		7.75495	7.8357	7.96394	7.12363	7.27527	7.22243	6.76903	6.77026	6.85516	7.6621	7.61488	7.56288	7.15284	6.97246	7.20804	6.84854	7.1238	6.73603	7.54614	7.72992	7.85206	6.88511	7.27195	7.24762	6.49062	6.69523	6.64509
sp|Q3TXS7|PSMD1_MOUSE	31	AAVESLGFILFR;DNLEWLAR;DSDPMETEEK;DTSEDVEELVEPVAAHGPK;EAINLLEPMTNDPVNYVR;EALQLMATYLPK;FGAILAQGILDAGGHNVTISLQSR;FTATASLGVIHK;HGGSLGLGLAAMGTAR;IEVLYEDEGFR;LLHVAVSDVNDDVR;LLHVAVSDVNDDVRR;MEEADALIESLC[+57.0214635]R;MEVDEAEKK;NAQAIEDMVGYAQETQHEK;NNNTDLMILK;NSVC[+57.0214635]HTATVIANSFMHC[+57.0214635]GTTSDQFLR;QAIGIALETR;QC[+57.0214635]VENADLPEGEK;QC[+57.0214635]VENADLPEGEKKPIDQR;SGMYTVAMAYC[+57.0214635]…		6.21931	6.32796	6.32046	6.06521	5.89872	5.88851	5.72997	5.71384	5.85671	6.24427	6.22313	6.05319	6.05712	5.83035	5.83966	5.83397	5.76961	5.79469	6.21617	6.28327	6.27331	5.9858	5.96336	5.98524	5.68307	5.83558	5.74343
sp|Q9WTI7-3|MYO1C_MOUSE;sp|Q9WTI7|MYO1C_MOUSE	13	C[+57.0214635]PENAFFLDHVR;GEELLSPLNLEQAAYAR;GIISILDEEC[+57.0214635]LRPGEATDLTFLEK;LLGVEGTTLR;LLQFYAETC[+57.0214635]PAPER;MSLLQLVEILR;NFHVFYQLLEGGEEETLR;NPQSYLYLVK;QKGDVVLQSDHVIETLTK;QLLLTPSAVVIVEDAK;VLQSLGSEPIQYAVPVVK;VLQSLGSEPIQYAVPVVKYDR;VNNININQGSITFAGGPGR		2.3321	2.48133	2.44216	2.51429	2.4278	2.58261	2.24185	2.0283	2.32584	2.41273	2.25864	2.22448	2.69998	2.46298	2.41335	3.14286	3.32065	3.15096	2.3751	2.32495	2.33271	2.30863	2.39759	2.11298	2.48113	2.29824	2.10666
sp|Q9EPU0-2|RENT1_MOUSE;sp|Q9EPU0|RENT1_MOUSE	35	ADSVVVLLC[+57.0214635]R;AGAKPDQIGIITPYEGQR;AGLSQSLFER;C[+57.0214635]FLSWLVK;DETGELSSADEKR;DINWDSSQWQPLIQDR;DLPVHAC[+57.0214635]SYC[+57.0214635]GIHDPAC[+57.0214635]VVYC[+57.0214635]NTSK;EAIDSPVSFLALHNQIR;EAIIPGSVYDR;EKDFIILSC[+57.0214635]VR;ENPSATLEDLEKPGVDEEPQHVLLR;ESQTQDNITVR;FMTTAMYDAR;GNTSGSHIVNHLVR;IAFFTLPK;KLVNTVNPGAR;LKESQTQDNITVR;LLGHEVEDVVIK;LMQGDEIC[+57.0214635]LR;LYQEVEIASVDAFQGR;MHPALS…		5.60825	5.63876	5.76085	5.02311	5.0667	5.04441	4.70347	4.64071	4.62964	5.54087	5.50133	5.64909	5.15964	4.94026	4.83364	4.73469	4.94488	4.76931	5.40124	5.56956	5.57106	4.89167	5.14954	4.91849	4.52006	4.7028	4.65966
sp|P68254-2|1433T_MOUSE;sp|P68254|1433T_MOUSE	10	AVTEQGAELSNEER;KQTIENSQGAYQEAFDISK;LAEQAERYDDMATC[+57.0214635]MK;QTIENSQGAYQEAFDISKK;SIC[+57.0214635]TTVLELLDK;TAFDEAIAELDTLNEDSYK;YDDMATC[+57.0214635]MK;YLAEVAC[+57.0214635]GDDR;YLAEVAC[+57.0214635]GDDRK;YLIANATNPESK		4.62231	4.69703	4.65467	3.9137	3.83461	3.78598	3.61695	3.82121	3.91301	4.54481	4.66238	4.72865	3.58072	3.78158	4.43999	3.85153	3.34179	3.85941	5.16365	4.72098	4.9843	4.27752	3.64922	4.07573	4.06346	3.61684	3.6459
sp|P62627|DLRB1_MOUSE	2	GVQGIIVVNTEGIPIK;STMDNPTTTQYANLMHNFILK		-0.299855	-0.317747	-0.198968	-0.054034	-0.455408	-0.382904	-0.230772	-0.0839885	-0.280323	-0.141226	-0.25264	0.208467	-0.0266394	-0.23746	-0.117447	0.220584	-0.21493	-0.179717	0.410458	0.0482017	0.208967	0.146641	-0.598681	-0.151421	0.106374	0.0146508	0.0407372
sp|Q3UKJ7|SMU1_MOUSE	14	AAIAQALAGEVSVVPPSR;DSSQILSASFDQTIR;DTEMLATGAQDGK;DVEEEKFPTQLSR;DVIGIAHHPHQNLIATYSEDGLLK;EGGDFVC[+57.0214635]C[+57.0214635]ALSPR;GHSSFVNEATFTQDGHYIISASSDGTVK;LMALLGQALK;NPEHFVVC[+57.0214635]NR;QTDPMIMLK;SLGSTAGTDITVNSVILLPK;SNTVVIMNMQGQIVR;TTEC[+57.0214635]SNTFK;YIHLENLLAR		5.13959	5.15144	5.22014	4.6683	4.73039	4.70575	4.30607	4.22338	4.248	5.17306	5.0166	5.01656	4.74987	4.55605	4.60082	4.15602	4.05898	4.06232	4.92758	4.99734	5.15113	4.48252	4.7718	4.72872	4.05267	4.13356	4.09478
sp|P54276|MSH6_MOUSE	47	ADEALSKDTAER;AGFDSDYDQALADIR;AIMYEETTYSK;AMVAQGGLR;AYC[+57.0214635]VLVTGPNMGGK;EFERMNQSLQLFR;EKEEETSGHTR;ENEQSLLEYLDK;EVC[+57.0214635]LATEKPTINGEAIHR;FFIGQFSDDR;GGDAAWSEAEPGSR;GNWAHSGFPEIAFGR;GRFPDLTAELQR;GTATFDGTAIANAVVK;GTATFDGTAIANAVVKELAETIK;GTQTYSVLDGDPSENYSR;HATAHSLVLVDELGR;IHNVGSPLK;IIDFLSALEGFK;IIDFLSALEGFKVMC[+57.0214635]K;LANLINAEER;LANLINAEERR;LANLPEEVIQK;LDAVEDLMAVPDK;LDAVEDLMAVPDKVTE…		7.71187	7.7259	7.72588	6.60656	6.58962	6.53565	5.88793	5.84661	5.85921	7.67525	7.72923	7.83318	6.59588	6.38306	6.387	5.89728	6.06024	5.91134	7.7144	7.81715	7.77577	6.54424	6.67856	6.62264	5.98778	6.00838	5.93527
sp|Q91YH5|ATLA3_MOUSE	6	ALASVLLQDHIR;EHQHEEIQNVR;ELGGAIDSGAAYVLEQASSHIGNSTQAAVR;SFILDFMLR;SMLQATAEANNLAAAASAK;YQQELEEEIKELYENFC[+57.0214635]K		0.747205	0.917318	1.05638	1.55201	1.10971	1.43454	1.07069	1.21673	1.26802	0.953063	0.778568	1.06531	1.48157	1.04055	0.754271	0.987715	1.09256	1.22123	1.07129	0.726039	0.910376	1.52616	1.35392	0.971804	1.07497	1.36004	1.47089
sp|Q9EPU4|CPSF1_MOUSE	22	AESTEQEPSAPK;C[+57.0214635]AAMLIYGTR;C[+57.0214635]TAHYVAYHVESK;DGFVQNVHTPR;DVSGMFTTESR;ENGTMEIYQLPDWR;ESLAEEHEGLMGEGQR;GGEIYVLTLITDGMR;GPVTALC[+57.0214635]HC[+57.0214635]NGHLVSAIGQK;GYVAAGTC[+57.0214635]LMQGEEVTC[+57.0214635]R;IELEEWEHVTC[+57.0214635]MK;IFLWSLR;IGTTPDIILDDLLETDR;IGTTPDIILDDLLETDRVTAHF;ISVLPAYLSYDAPWPVR;KAEGC[+57.0214635]STEEGSGGR;LHPMGIDGPIDSFAPFHNVNC[+57.0214635]PR;NFILAADVMK;S…		3.51099	3.57314	3.71479	3.11354	3.26455	3.2593	3.00018	2.94124	2.91189	3.55917	3.43322	3.58835	3.2466	3.1769	3.07283	2.98577	3.1222	3.07969	3.34106	3.46266	3.55168	2.96589	3.27268	3.21035	2.80108	2.8773	2.93072
sp|P43247|MSH2_MOUSE	32	ALELEEFQNIGTSLGC[+57.0214635]DEAEPAAK;ALNLFQGSVEDTTGSQSLAALLNK;DKQMFHIITGPNMGGK;DSLIIIDELGR;EC[+57.0214635]VLPGGETTGDMGK;ENEWYLAFK;ETLQLEGAAEAGFVR;FTNSELSSLNEEYTK;GDFYTAHGEDALLAAR;GEYEEAQDAIVK;GVSTFMAEMLETASILR;HQALLLAVFVTPLIDLR;HVGVGYVDSTQR;HVGVGYVDSTQRK;KGEQINSAALPEMENQVAVSSLSAVIK;KGVC[+57.0214635]DQSFGIHVAELANFPR;KMQSTLINAAR;LDSSAQFGYYFR;LFDRGDFYTAHGEDALLAAR;LNLVEAFVEDSELR;LNLVEAFVEDSELRQSLQED…		6.93853	6.94805	7.03533	6.00127	5.97302	5.94046	5.44911	5.24927	5.33723	6.91765	6.86514	7.00107	5.95459	5.75569	5.74067	5.29062	5.34135	5.37922	6.90717	7.05097	7.02305	5.95835	6.00771	6.0663	5.4483	5.49678	5.41259
sp|O88543|CSN3_MOUSE	10	AMDQEITVNPQFVQK;DGMVSFHDNPEK;FIKPLSNAYHELAQVYSTNNPSELR;MQMNTNQLTSVHADLC[+57.0214635]QLC[+57.0214635]LLAK;QLSAQGQMTQLC[+57.0214635]ELINK;SMGSQEDDSGNKPSSYS;TFLTLSLQDMASR;VQLSGPQEAEK;YATDTFAGLC[+57.0214635]HQLTNALVER;YNNPAMLHNIDQEMLK		2.93842	2.91564	3.10973	2.39105	2.6189	2.37601	2.35228	2.41447	2.53642	2.86484	2.72228	2.88183	2.27401	2.48416	2.69498	2.52359	2.22653	2.49677	2.84197	2.78164	2.98309	2.38551	2.36082	2.48324	2.29687	2.26166	2.35641
sp|P97313|PRKDC_MOUSE	13	ATQQQYDFTPTQASVER;AVQSAEEETQLSC[+57.0214635]WGHEAAAER;C[+57.0214635]LVDQATDPNILGR;DLC[+57.0214635]NTNLMQVLVK;LLEEALLR;LVINTEEVFRPYAK;NIQASC[+57.0214635]DQSILLGTTC[+57.0214635]R;QLFSSLFSGILK;SVAFFLESIATHSAR;TITLLDESDISNYLNK;TSAEMEAYPALVVEK;VTELALSASDR;YPDVVTDPMHIWDDIITNR		-0.726696	0.144221	-0.926198	-0.957662	0.863622	-1.01497	-1.07609	-0.573892	-0.941343	-1.36854	-0.737004	-0.914644	0.0346702	-0.117284	0.077962	0.753052	0.0642466	-1.05073	-0.481612	-0.464548	-0.970656	-0.450068	-0.582486	-0.50533	-1.26692	-0.838962	-0.415501
sp|P18242|CATD_MOUSE	16	AIGAVPLIQGEYMIPC[+57.0214635]EK;AYWQVHMDQLEVGNELTLC[+57.0214635]K;DPEGQPGGELMLGGTDSK;GGC[+57.0214635]EAIVDTGTSLLVGPVEEVK;GGC[+57.0214635]EAIVDTGTSLLVGPVEEVKELQK;ILDIAC[+57.0214635]WVHHK;KAYWQVHMDQLEVGNELTLC[+57.0214635]K;NIFSFYLNR;NIFSFYLNRDPEGQPGGELMLGGTDSK;NYELHPDK;NYELHPDKYILK;QIFGEATKQPGIVFVAAK;QPGIVFVAAK;TMTEVGGSVEDLILKGPITK;TTEPVSELLK;VSSLPTVYLK		4.66385	4.66029	4.82143	6.05194	5.94268	6.00299	6.76343	6.86923	6.6449	4.57678	4.56027	4.74636	6.05298	5.89614	6.08228	6.36209	6.37983	6.39194	4.62615	4.77681	4.7618	6.05812	6.29863	6.4317	6.54975	6.82503	6.8651
sp|Q8VIJ6|SFPQ_MOUSE	23	AELDDTPMR;ALAEIAKAELDDTPMR;DKLESEMEDAYHEHQANLLR;EEYEGPNKKPR;FAQHGTFEYEYSQR;FATHAAALSVR;FGQGGAGPVGGQGPR;GIVEFASKPAAR;GMGPGTPAGYGR;ISDSEGFKANLSLLR;LFVGNLPADITEDEFK;LFVGNLPADITEDEFKR;MEELHSQEMQK;MGGGGTMNMGDPYGSGGQK;NLSPYVSNELLEEAFSQFGPIER;QHHAPYHQQHHQGPPPGGPGPR;QREMEEQMR;RMEELHSQEMQK;SLDEMEKQQR;SPPPGMGLNQNR;TEEKISDSEGFK;YGEPGEVFINK;YGEPGEVFINKGK		7.37788	7.45418	7.5171	6.86826	6.9769	6.87144	6.66938	6.80275	6.60596	7.33647	7.43403	7.72336	7.06624	6.8506	6.86036	6.85837	7.3977	6.75289	7.39816	7.54073	7.43298	6.86117	7.16516	7.26234	6.43142	6.76154	6.85222
sp|Q3THG9|AASD1_MOUSE	5	EFTTTVVSC[+57.0214635]SPAELQTDASGGKK;ELSLDDPEVEQVR;SNLIFLAGNR;SSPAWGGVVTLHR;VVTIEGVDSNMC[+57.0214635]C[+57.0214635]GTHVSNLSDLQVIK		1.81782	1.80815	1.99028	0.838817	0.82777	0.796705	1.12811	1.34997	1.00152	1.93486	1.89721	1.9569	0.854631	0.775106	0.874168	0.817117	0.964087	0.694853	1.96553	2.09328	1.97437	0.907366	0.853761	0.911522	0.814735	1.30206	1.46629
sp|F6ZDS4|TPR_MOUSE	57	AIESMEQQLSELKK;AMVTSLEDSLNK;AMVTSLEDSLNKEK;ASTALSNEQQAR;DAVQAPLNVSLNEEGK;DEEVSSADISSSSEVISQHLVSYR;ELENANDLLSATK;ELLHNQNSWLNTELK;ELMLHAADVEALQAAK;ELQELQDSLNVER;EQQPTSASER;ETASEAADGAAPAAGLR;FEVAQVESLR;FLAEQQSEIDC[+57.0214635]LK;GAILSEEELAAMSPTAAAVAK;GIASTSDPPTANIKPTPVVSTPSK;GLQLTPGIGGMQQHFFDDEDR;GQNLLLTNLQTIQGILER;IAVEAQNKYER;IQQLNEEVGR;ITHLSGVKDQLTK;KGAILSEEELAAMSPTAAAVAK;KLELDILPLQEANAELSEK;KLENE…		5.50311	5.52936	5.48259	5.11768	4.78395	4.81755	4.67858	4.54203	4.77041	5.4222	5.75981	5.79884	4.75621	4.83927	5.09481	4.95115	4.87058	4.55641	5.69431	5.78274	5.49912	5.38242	4.77301	5.43373	5.04779	4.58958	4.95474
sp|Q923B1|DBR1_MOUSE	6	ATDDLINVTGGLWNMPEDNGLHTR;FAALMQHQATDKDQAGK;GHFEC[+57.0214635]PPYNSSTIR;VPC[+57.0214635]NFTMTAAC[+57.0214635]YDPSKPQTQVK;WDYSATEETMK;WDYSATEETMKEVMEK		0.616629	0.2418	0.671437	-0.666282	-0.487909	-0.522096	-0.179455	-0.500136	-0.541791	0.45934	0.26333	0.36406	-0.750362	-0.361292	-0.2129	-0.354129	-0.938868	-0.571038	0.0876441	0.513962	0.623065	-0.767102	-0.171562	0.220384	-0.446571	-0.499211	-0.717179
sp|P62858|RS28_MOUSE	5	EGDVLTLLESER;EGDVLTLLESEREAR;TGSQGQC[+57.0214635]TQVR;TGSQGQC[+57.0214635]TQVRVEFMDDTSR;VEFMDDTSR		6.19261	6.22921	6.11049	5.46581	5.06261	5.12469	4.89384	5.03131	4.80438	6.14916	6.35566	6.81366	5.23939	5.19762	5.55443	5.2459	5.17017	5.18244	6.75926	6.31616	6.45283	5.66528	4.91399	5.58493	5.17838	4.86214	4.89356
sp|P23116|EIF3A_MOUSE	41	AFKDIDIEDLEELDPDFIMAK;ALEVIRPAHILQEK;AVEDIHGLFSLSK;DLYNWLEVEFNPLK;DMDLWEQQEEER;EDAPVGPHLQSMPSEQIR;EEQHQLAVNAYLK;EKEELEQR;EQPEKEPELQQYVPQLQNNTILR;FLWESYR;FSVLQYVVPEVK;GPAEESSSWR;HHNQSTAINLNNPESQSMHLETR;IGLINDMVR;ILQEHEQIK;KGPEADSEWR;KNLTQEEMQR;KPPKPQLMANYYNK;LATLLGLQAPPTR;LLDMDGIIVEK;LLDMDGIIVEKQR;LLLTPWVK;LLQQVAQIYQSIEFSR;LTSLVPFVDAFQLER;LVQLDSAISMELWQEAFK;LYHDIAQQAFK;MHLSQIQR;MLEDRDLFVMR;NETDEDG…		7.2844	7.47212	7.45427	6.57469	6.71958	6.63703	6.51906	6.41356	6.48736	7.32344	7.34159	7.51402	6.72705	6.50787	6.54353	6.75232	7.01606	6.58837	7.28173	7.30838	7.27315	6.55171	6.71278	6.59251	6.27769	6.29299	6.56337
sp|Q99JR1|SFXN1_MOUSE	7	NILLTNEQLENAR;QAITQVVISR;QGIVPAGLTENELWR;SSMSVTSLEDELQASIQR;VGIPVTDENGTR;WDQSTFIGR;YAYDSAFHPDTGEK		3.61803	3.59955	3.89985	2.60076	2.54834	2.64948	3.27999	3.32913	3.28816	3.68357	3.63071	3.92262	3.13902	2.95164	3.08647	4.03111	4.34878	4.21431	3.60237	3.83926	3.6778	2.88248	2.92827	3.09724	3.52195	3.5244	3.39373
sp|Q8CEC0-2|NUP88_MOUSE;sp|Q8CEC0-3|NUP88_MOUSE;sp|Q8CEC0|NUP88_MOUSE	13	ATVNC[+57.0214635]STIPIAER;EKQEDIMNR;ELQLIPDQLR;FFTSSTSLTLK;FLGSDEEDKDSLQELTAEQK;GLMALELPQR;GPSGGGVEPPLSQYQR;ILAETPDSFEK;LASGEDDPFASDFSC[+57.0214635]PIK;QLEDLNYC[+57.0214635]R;QLEDLNYC[+57.0214635]REER;VIVLSEAEEESLILNK;VLHSFHAQLPVLSDSER		3.75085	3.75531	3.78595	3.07693	3.25868	3.17297	2.96688	2.98378	2.99382	3.64053	3.76553	3.85112	3.18086	3.16477	3.37647	3.1165	3.35482	3.10569	3.63508	3.84619	3.821	3.17257	3.40283	3.61408	3.12693	3.12255	3.01767
sp|Q9DCJ9|NPL_MOUSE	8	AEELLDGIQDK;AEELLDGIQDKIPTFQGLK;DLASALSYQFR;EVAAAAPTLPFYYYHMPSMTGVK;FTDTDLLDFGQC[+57.0214635]VDQNHQR;QVAEEWVNQGR;SLDFLSSPSVK;TNQMLEAFEQK		-0.550446	-0.43613	-0.334893	2.17043	2.23116	2.37994	2.98945	3.26389	3.12439	0.104815	-0.0775162	0.33202	3.07211	3.14761	3.63858	4.16439	4.26881	4.33357	1.0259	0.790979	0.551436	2.57012	2.04376	2.56012	3.47527	2.89504	2.92759
sp|Q8BJS4-2|SUN2_MOUSE;sp|Q8BJS4-3|SUN2_MOUSE;sp|Q8BJS4|SUN2_MOUSE	13	ADVESQFPDWIR;DASQHFQAEQR;DTVAHIQEELATLR;EGIVGVTEEQVHR;IGMVDYALESGGASVISTR;ILTNWGHPEYTC[+57.0214635]IYR;IVQASQESEAR;LTTAASLLDVFVLTR;QNSVADEVGLLPQK;SALLDDHLHSEPYWSGDLR;SMTQEAFQESSVK;TALLSLFGIPLWYHSQSPR;VILQPDVHPGNC[+57.0214635]WAFQGPQGFAVVR		-0.597558	-0.456411	-0.399248	1.47048	1.32554	1.4705	1.09609	0.878232	1.04224	-1.01182	-0.538191	-0.429859	1.69954	1.4944	1.19062	1.2697	1.67298	1.45677	-0.0200639	-0.179149	-0.196404	1.62619	1.67787	1.41711	1.28432	1.47158	1.38646
sp|Q99JY0|ECHB_MOUSE	13	AGLTMNDIDAFEFHEAFSGQILANFK;AMDSDWFAQNYMGR;DFIYVSQDPK;DFIYVSQDPKDQLLLGPTYATPK;DGGQYALVAAC[+57.0214635]AAGGQGHAMIVEAYPK;DNGIRPSSLEQMAK;DQLLLGPTYATPK;DVVDYIIFGTVIQEVK;EAALGAGFSDK;FNIWGGSLSLGHPFGATGC[+57.0214635]R;IPFLLSGTSYK;LNFLSPELPAVAEFSTNETMGHSADR;MEQDEYALR		4.12849	4.0727	4.1824	4.30894	4.15296	4.03396	4.74735	4.81203	4.68534	4.27117	4.29856	4.40655	4.48938	4.41753	4.45621	5.02182	5.09887	5.13713	4.53849	4.57882	4.49841	4.62492	4.6778	4.79914	4.86853	4.94591	4.93546
sp|Q80TE0|RPAP1_MOUSE	10	AGYSLQELFHLTR;ALALQVLSQIVGR;ALQTLPTELSAHPLQPLAMQR;FQSQFLEAGAAPAVQLVK;LQAMDPEEILK;LWAVAASYGQGGDLYR;SHSQVQEQTGTK;SIFAQEIAAR;SKVAEQEVQTIHEENVAR;VAEQEVQTIHEENVAR		0.868471	1.09724	1.10639	-0.154079	-0.18353	-0.175944	-0.941673	-0.657127	-0.75753	0.914918	1.22396	1.29193	-0.116718	-0.293515	-0.701555	-0.953767	-0.916142	-0.918471	1.13814	1.23592	1.13768	0.0654465	-0.245424	-0.544445	-0.99813	-0.859942	-0.543129
sp|P02469|LAMB1_MOUSE	69	AAQNSGEAEYIEK;AAQNSGEAEYIEKVVYSVK;AELLLEEAK;AELLLEEAKR;AELLQNEAK;ALDPAFKIEDPYSPR;AMDFDRDVLSALAEVEQLSK;ATGQC[+57.0214635]SC[+57.0214635]LPNVIGQNC[+57.0214635]DR;AVITVQRPGK;AVITVQRPGKIPASSR;C[+57.0214635]GGPGC[+57.0214635]GGLVTVAHSAWQK;C[+57.0214635]GNTVPDDDNQVVSLSPGSR;C[+57.0214635]LYHTEGDHC[+57.0214635]QLC[+57.0214635]QYGYYGDALR;C[+57.0214635]VC[+57.0214635]NYLGTVK;DILAQSPAAEPLK;DPYHETLNPDSHLIENV…		3.99868	3.70075	3.73138	7.29925	6.93646	6.99542	9.03788	9.35874	8.59727	3.98201	4.06759	4.19087	7.93522	7.6566	7.78507	9.63781	9.6896	10.2049	3.51839	3.53271	3.72548	7.17962	7.15059	7.30752	9.30009	9.3996	8.65565
sp|P62751|RL23A_MOUSE	8	EAPAPPKAEAK;KLYDIDVAK;LAPDYDALDVANK;LAPDYDALDVANKIGII;LDHYAIIKFPLTTESAMK;NKLDHYAIIK;VNTLIRPDGEK;VNTLIRPDGEKK		4.56562	4.32025	4.1246	3.1054	3.50376	3.15549	3.04039	3.24784	3.18614	4.46051	4.77456	4.96591	3.08799	3.60333	4.061	3.39612	3.38922	3.19178	4.70731	4.22059	4.24668	3.57271	3.22017	3.73002	3.3732	3.12799	3.18887
sp|Q80X90|FLNB_MOUSE	103	AAGSGELGVTVK;AAGSGELGVTVKGPK;AC[+57.0214635]IPQSFTVDSSKAGLAPLEVR;ADIEMPFDPSK;AEISC[+57.0214635]IDNK;AEVSIQNNK;AFGPGIEGKDVFR;AGSNMLLIGVHGPTTPC[+57.0214635]EEVSMK;AGVENGKPTHFTVHTK;AHGPGLEGGLVGKPAEFTIDTK;AKVYGQGLSEGR;APAVATVGSIC[+57.0214635]DLNLK;APLNVQFSSPLPGEAVK;AQITNPSGASTEC[+57.0214635]FVK;ATPEIVDNKDGTVTVR;ATVHDNKDGTYAVTYIPDK;AWGPGLHGGIVGR;C[+57.0214635]LATGPGIAPTVK;C[+57.0214635]LTVLSLQESGLK;C[…		7.21393	7.15427	7.25391	7.96348	7.72143	7.65728	8.11688	8.19583	8.15282	7.1014	7.15491	7.26469	8.21225	8.12018	8.25811	9.27109	9.53747	9.31077	7.18499	7.2624	7.2447	7.86109	7.94502	8.0731	8.48657	8.24219	7.9955
sp|Q9QXS1-4|PLEC_MOUSE;sp|Q9QXS1-5|PLEC_MOUSE	31	AALAHSEIATTQAASTK;AGVGAPVTQVTLQSTQR;ALVPAAELLDSGVISHELYQQLQR;AQAEAQQPVFNTLR;DLLQPEVAVALLEAQAGTGHIIDPATSAR;DPYSGNTISLFQAMK;DTHDQLSEPSEVR;GDQC[+57.0214635]QLVGPAQPSHWK;GYYSPYSVSGSGSTAGSR;IDSAEWGVDLPSVEAQLGSHR;LGFHLPLEVAYQR;LISLFQAMK;LKAEAELLQQQK;LLDAQLSTGGIVDPSK;LLEAQAC[+57.0214635]TGGIIDPSTGER;LLEAQIATGGIIDPEESHR;LLLEAQAATGFLLDPVK;LLLEAQAATGFLLDPVKGER;NDESQLSPATR;QLEMSAEAER;QQNLASYDYVR;QSAEEQAQAQA…		2.51302	2.52838	2.76485	1.75372	1.539	1.56499	1.61368	1.59068	1.75099	2.45491	2.59773	2.79748	1.81749	1.78113	1.78833	2.32255	2.63993	2.28769	2.41393	2.56243	2.62788	1.74214	1.74921	1.58986	1.99374	1.90836	2.03358
sp|Q7M6Y3-2|PICAL_MOUSE;sp|Q7M6Y3-3|PICAL_MOUSE;sp|Q7M6Y3-5|PICAL_MOUSE	9	ATTLSNAVSSLASTGLSLTK;GDIPDLSQAPSSLLDALEQHLASLEGK;ITAAQHSVTGSAVSK;LFAAYNEGIINLLEK;NDVSWSQPGEK;NTLFNLSNFLDK;QAALEEEQAR;STNVAVDSGGGLLKPTVASQNQSLPVAK;VAEQVGIDR		2.87273	2.83828	3.08396	2.21851	2.19772	2.32316	2.23961	2.27012	2.26145	2.99683	3.04093	3.28636	2.17438	2.3367	2.29313	2.68331	2.56505	2.92887	3.29493	3.22696	3.23866	2.45777	2.22144	2.48123	2.38841	2.296	2.35997
sp|Q80Y81-2|RNZ2_MOUSE;sp|Q80Y81|RNZ2_MOUSE	13	AALLTQQADSPEDR;AALLTQQADSPEDREPQQK;ALFAGDIEEMVER;DATLLIHEATLEDGLEEEAVEK;ELGLPVGTAAIAPIIAAVK;IQTQLSLIHPDIFPQLTSFYSK;MHWSNVGGLC[+57.0214635]GMILTLK;MNAEFIMLNHFSQR;SQYPEIVFLGTGSAIPMK;THSTTSQAINVGMR;VC[+57.0214635]FGDFPTVPK;VVYSGDTMPC[+57.0214635]EALVQMGK;YLFNC[+57.0214635]GEGVQR		3.30976	3.25675	3.48944	1.90725	1.96096	1.83289	1.37774	1.30426	1.49708	3.40572	3.27199	3.55645	1.85342	2.05813	2.20283	1.41694	0.923065	1.44579	3.2575	3.36565	3.52779	1.85973	2.09396	2.1356	1.26893	1.3306	1.37939
sp|Q6ZQ38|CAND1_MOUSE	35	AADIDQEVKER;AAFEC[+57.0214635]MYTLLDSC[+57.0214635]LDR;ADVFHAYLSLLK;ALTLIAGSPLK;AVAALLTIPEAEK;C[+57.0214635]LDAVVSTR;DLLDSVLPHLYNETK;DSIKLDDDSER;EGPAVVGQFIQDVK;EIISSASVAGLKPYVENIWALLLK;EYQVETIVDTLC[+57.0214635]TNMLSDKEQLR;FC[+57.0214635]NVDDDELR;FMATNDLMTELQK;FMATNDLMTELQKDSIK;FTISDHPQPIDPLLK;HC[+57.0214635]EC[+57.0214635]AEEGTR;HEMLPEFYK;HTVDDGLDIR;HTVDDGLDIRK;ISGSILNELIGLVR;ITSEALLVTQQLVK;LGTLS…		6.38145	6.49695	6.56442	6.3663	6.44791	6.51899	6.403	6.51301	6.47901	6.46813	6.49796	6.63312	6.36601	6.25021	6.31403	6.58613	6.55844	6.60266	6.53238	6.57562	6.63666	6.36419	6.42395	6.45959	6.15879	6.31184	6.4756
sp|Q9D6R2|IDH3A_MOUSE	12	C[+57.0214635]SDFTEEIC[+57.0214635]R;DMANPTALLLSAVMMLR;ENTEGEYSGIEHVIVDGVVQSIK;IAEFAFEYAR;IEAAC[+57.0214635]FATIK;KTFDLYANVRPC[+57.0214635]VSIEGYK;LITEEASKR;MSDGLFLQK;NVTAIQGPGGK;TFDLYANVRPC[+57.0214635]VSIEGYK;TPIAAGHPSMNLLLR;TPYTDVNIVTIR		5.30892	5.32687	5.32581	5.19582	5.12345	5.05246	4.85357	4.82074	4.84703	5.32932	5.25495	5.2499	5.34707	5.18761	5.21239	5.16605	5.36708	5.10603	5.42212	5.48568	5.4468	5.28658	5.34779	5.30284	4.85387	4.96677	4.83979
sp|Q9Z1Q9|SYVC_MOUSE	34	ADFPAGIPEC[+57.0214635]GTDALR;ALNPLEDWLR;AVLGEVALYSGAR;C[+57.0214635]GEMAQAASAAVTR;DNPMVVPLC[+57.0214635]NR;DPEAEAALELALSITR;DPGVITYDLPTPPGEK;EAFLEEVWK;EVYLHAIVR;FGLC[+57.0214635]AYTSQGR;GETTLWNPGC[+57.0214635]DHAGIATQVVVEK;GFVPSATSKPEGHESLVDR;GPGQDPQAALGALGK;GVKDNPMVVPLC[+57.0214635]NR;HRLEAISIMDSK;IETMLGDVAVAVHPK;IPAYFITVHDPAVPPGEDPDGR;ITPAHDQNDYEVGQR;KVDEAIALFQK;LEAISIMDSK;LGSSLDWDR;LHEEGVIYR;…		6.90427	6.88636	6.96546	6.41827	6.40098	6.39624	5.91763	5.87876	5.86422	6.94356	6.95553	7.0256	6.37114	6.22989	6.30835	5.88755	5.85491	5.75655	6.91904	7.01017	6.98907	6.35283	6.44528	6.51224	5.80105	5.90994	5.99152
sp|Q922S8|KIF2C_MOUSE	11	AESALTQQAK;ASC[+57.0214635]STVTELPLLMVSEEAEEQAHSTR;ATC[+57.0214635]FAYGQTGSGK;DSLPLQENVTVPK;EIDIDDVAAINPELLQLLPLRPK;FSLVDLAGNER;MINMGSAC[+57.0214635]R;STSSANPGNSVR;THTMGGDLSGK;TSGQTFANSNSSR;VTMEC[+57.0214635]SPLTVTDPIEEHR		3.92073	3.91937	4.0416	2.56934	2.54768	2.45618	1.14536	0.902477	1.22802	3.91088	3.8698	3.78346	2.68372	2.40714	2.67444	1.26888	1.47381	1.05889	3.89466	4.04779	4.05052	2.66942	2.98957	3.10219	1.57224	1.71965	1.36394
sp|Q8R1B4|EIF3C_MOUSE	27	AKELLGQGLLLR;C[+57.0214635]LEEFELLGK;DAHNALLDIQSSGR;DFESHITNYK;DLMLMSHLQDNIQHADPPVQILYNR;ELLGQGLLLR;FEELTNLIR;GC[+57.0214635]ILTLVER;GTEITHAVVIK;GTEITHAVVIKK;GTTEEIC[+57.0214635]QIYLR;ILADLEDYLNELWEDK;ILADLEDYLNELWEDKEGK;KLNEILQVR;LDEEEEDNEGGEWER;LGSLVENNER;MIINEELMASLDQPTQTVVMHR;QGTYGGYFR;QPLLLSEDEEDTKR;RLDEEEEDNEGGEWER;SEQDQAENEGEDSAVLMER;TC[+57.0214635]HSFIINEK;TEPTAQQNLALQLAEK;TEPTAQQNLALQLAE…		6.60715	6.59205	6.69661	5.67197	5.77145	5.52306	5.44723	5.37359	5.42305	6.52323	6.4254	6.44783	5.74878	5.59193	5.62567	5.63923	5.55681	5.51578	6.36179	6.4649	6.53827	5.51396	5.7261	5.52138	5.17268	5.30308	5.32972
sp|Q9EQ61|PESC_MOUSE	12	C[+57.0214635]HVQTIQLC[+57.0214635]R;EALAFIIR;FLLHEPIVNK;GSATNYITR;ISEDTYALDSESSMEK;ISEDTYALDSESSMEKLAALSASLAR;LAALSASLAR;LAQEEESEAK;LAQEEESEAKR;LEGQAQAETK;LTVEFLHYVITAR;YYVQPQWVFDC[+57.0214635]VNAR		4.73921	4.85433	4.62627	3.5868	3.61605	3.40376	2.82774	2.85426	2.83921	4.62244	4.71757	4.66291	3.6335	3.54647	3.54786	2.87161	3.09702	2.71804	4.7643	4.68558	4.60844	3.75601	3.74137	3.65875	2.94487	3.02937	2.88473
sp|Q9JHU4|DYHC1_MOUSE	159	AATSPALFNR;ADLAAVEAK;AELGEYIR;AERPDVDEK;AEVDMDTDAPQVSHKPGGEPK;AKEALELTDTGLLSGSEER;ALEHAFKLEHIMDLTR;AMSRPILYSNWLSK;ANEVEQMIR;ANEVEQMIRDLEASIAR;APVIDADKPVSSQLR;ASVVTLPVYLNFTR;AVDDLNLHSYSNLPIWVNK;AWTQVLLGQAEDK;C[+57.0214635]LGSLFSMLHQAC[+57.0214635]R;C[+57.0214635]YLTMTQALEAR;DAATIMQPYFTSNGLVTK;DHLYGTLDPNTR;DLFQVAFNR;DSAIQQQVANLQMK;DVLLVAQGEMALEEFLK;EAIVNSC[+57.0214635]VFVHQTLHQANAR;EALELTDTGLLSGSEE…		7.63773	7.70789	7.83285	7.9632	7.82679	7.91397	7.99086	7.952	8.00435	7.65443	7.71749	7.78879	7.94999	7.75082	7.75709	8.23615	8.37879	8.16774	7.72296	7.82752	7.77516	7.96501	7.88379	7.9018	7.94061	7.94967	8.09189
sp|Q61033|LAP2A_MOUSE	10	AATQASSTESC[+57.0214635]DK;AEEPGVSDQSVFSSER;AQPLRAEEPGVSDQSVFSSER;GGDSGSC[+57.0214635]VAFQNTPGSEHR;IEASEPSFPLHESILK;LSQSSYQDSESLSPPR;MSAC[+57.0214635]AMGSSTMGR;SYEAAASALQIAAHTAFVAK;TYDAASYLC[+57.0214635]DAAFDEVR;VVEEEWQQIDR		2.21167	2.14119	2.15895	1.59902	1.61196	1.4119	1.40486	1.42872	1.4644	1.92439	2.03939	1.87501	1.55571	1.4409	1.67815	1.21215	1.23843	1.05658	1.93946	1.93854	2.01332	1.41344	1.61172	1.93078	1.33615	1.45917	1.33525
sp|P28352|APEX1_MOUSE	14	AAADDGEEPK;AAADDGEEPKSEPETK;EAAGEGPVLYEDPPDQK;EAAGEGPVLYEDPPDQKTSPSGK;EEAPDILC[+57.0214635]LQETK;EGYSGVGLLSR;GLDWVKEEAPDILC[+57.0214635]LQETK;IC[+57.0214635]SWNVDGLR;KPLVLC[+57.0214635]GDLNVAHEEIDLR;LDYFLLSHSLLPALC[+57.0214635]DSK;LPAELQELPGLTHQYWSAPSDK;NAGFTPQER;QGFGELLQAVPLADSFR;VSYGIGEEEHDQEGR		5.79265	5.71058	5.76736	4.84125	4.83457	4.80688	4.83977	4.80401	4.81961	5.79721	5.79602	5.84894	4.73108	4.83891	5.01014	4.58695	4.46163	4.58144	5.92643	5.801	5.84294	4.90077	4.79503	4.97044	4.70503	4.74466	4.78456
sp|P12265|BGLR_MOUSE	13	ADLSNNRLQGFEQQWYR;ALDGLWHFR;ALDLTRPVTFVSNAK;AVLENYHSVLDQK;DFIGWVWYER;ESGPVLDMPVPSSFNDITQEAALR;GFDWPLLVK;GYFVQDTSFDFFNYAGLHR;HHLEVMEELVR;LQGFEQQWYR;LVQSGPLTTC[+57.0214635]R;MFSEEYQK;VTTTESVTDYYTLPIGIR		0.233969	0.500072	0.458012	3.21532	3.02347	3.12132	4.81813	4.87501	4.78326	0.331521	0.159761	0.68031	3.32181	2.96678	3.10627	4.45487	4.51146	4.56778	-0.0651726	0.169674	0.250903	3.22212	3.23886	3.20779	4.58657	4.8971	5.05908
sp|O08553|DPYL2_MOUSE	16	DIGAIAQVHAENGDIIAEEQQR;DNFTLIPEGTNGTEER;FQLTDSQIYEVLSVIR;FQMPDQGMTSADDFFQGTK;GIQEEMEALVK;GLYDGPVC[+57.0214635]EVSVTPK;GSPLVVISQGK;GTVVYGEPITASLGTDGSHYWSK;ILDLGITGPEGHVLSRPEEVEAEAVNR;ISVGSDADLVIWDPDSVK;IVLEDGTLHVTEGSGR;MVIPGGIDVHTR;NLHQSGFSLSGAQIDDNIPR;SAAEVIAQAR;SITIANQTNC[+57.0214635]PLYVTK;THNSALEYNIFEGMEC[+57.0214635]R		3.10099	3.08481	3.17363	5.09511	5.06831	5.09346	4.91723	4.9883	4.79192	2.97619	3.00496	2.97738	4.87992	4.75169	4.76002	4.37299	4.47721	4.1797	2.38191	2.82093	2.75803	4.67592	5.0162	5.0879	4.35105	4.75429	4.96324
sp|Q587J6|LITD1_MOUSE	32	AKPLNSSHVLK;AKQEITYR;C[+57.0214635]DGEANVFSDLHSLR;C[+57.0214635]QEGGAAAASTQR;EADLILETEENFKR;EKELEPELQC[+57.0214635]SVK;ELAFSYLVWDSK;ELEPELQC[+57.0214635]SVK;ESPPEGGAGATLR;EVEVASPEVK;EVIEENFAELEDQSLEIVSAHR;FISDIPYLK;HSEVPASMMK;IASDSLSFLFIK;IFFDIEEFK;IFFDIEEFKK;IGMPC[+57.0214635]LTLYLTSPSESLGAGSDGPK;IGQQEGDAISERPKPGEK;ILQDEGFQPR;KTATSLC[+57.0214635]LK;LAADFSAATLDVGR;LSALSQVTPLLTNIEK;LSALSQVTPLLTNIE…		7.09292	7.14658	7.16557	3.67294	3.8621	3.78246	3.11515	3.02259	3.32282	7.11941	7.21235	7.34383	4.19969	4.08518	4.12424	4.51343	4.90288	4.54615	6.96865	7.07709	7.0354	3.8251	3.77668	4.02878	3.93609	3.34953	3.37583
sp|Q04692|SMRCD_MOUSE	15	AGGLGINLTSANVVILHDIDC[+57.0214635]NPYNDK;ALGC[+57.0214635]ILSELK;ASLSC[+57.0214635]FQNQR;EHEWMYTEALESLK;EQPSLLNQSLSLKPYQK;HGLNGILADEMGLGK;ITELRPFNNWEALFTK;LISQGTIEESMLK;LNYAIFDEGHMLK;NDSSELEDLSELEDLKDAK;NTEMC[+57.0214635]NVMMQLR;QEQLYSGLFNR;QVTMLTGNGGGWNR;TKPADEQSIYEK;VGLNWLALVHK		4.15309	4.10977	4.30542	2.27542	2.36425	2.36418	2.06226	1.87807	1.95127	4.12549	4.03644	4.14034	2.42092	2.25199	2.10213	1.68913	1.5622	1.55444	4.1772	4.30907	4.36627	2.34272	2.55331	2.33213	2.06122	2.21052	2.21355
sp|Q03265|ATPA_MOUSE	34	AVDSLVPIGR;DNGKHALIIYDDLSK;EAYPGDVFYLHSR;ELIIGDRQTGK;EVAAFAQFGSDLDAATQQLLSR;FENAFLSHVISQHQSLLGNIR;FNDGTDEKK;GIRPAINVGLSVSR;GMSLNLEPDNVGVVVFGNDK;GMSLNLEPDNVGVVVFGNDKLIK;GYLDKLEPSK;HALIIYDDLSK;HALIIYDDLSKQAVAYR;ILGADTSVDLEETGR;ILGADTSVDLEETGRVLSIGDGIAR;ISEQSDAK;ISVREPMQTGIK;ITKFENAFLSHVISQHQSLLGNIR;LKEIVTNFLAGFEP;LYC[+57.0214635]IYVAIGQK;LYC[+57.0214635]IYVAIGQKR;NVQAEEMVEFSSGLK;QGQYSPMAIEEQVAVIYAG…		8.51535	8.59508	8.59455	8.67912	8.57344	8.56236	8.59633	8.70986	8.60556	8.54466	8.67118	8.89113	8.78158	8.66542	8.68755	8.94322	9.28611	8.97145	8.74671	8.80873	8.79118	8.84802	8.76762	9.00879	8.76214	8.7957	8.71689
sp|Q99L48|NMD3_MOUSE	9	DATIPVESDTDDEGAPR;IKEIHDGLDFYYSSK;LISQDIHSNTYNYK;MVEFLQGIVPC[+57.0214635]R;QLEEFIVIEC[+57.0214635]STVR;QYQDFLEDLEEDEAIRK;STFSVEIVPIC[+57.0214635]K;TFYYLEQLILK;TSEMNTDKQYFC[+57.0214635]R		3.26384	3.22231	3.30135	1.87578	1.77634	1.75178	1.59037	1.46229	1.43955	3.20762	3.18209	3.29458	1.88106	1.70868	1.57144	1.45025	1.43624	1.36469	3.0651	3.16215	3.17071	1.79857	1.88447	1.91888	1.31262	1.49522	1.52471
sp|O09005|DEGS1_MOUSE	4	EEFEWVYTDQPHAAR;IASEYYDDLPHYNSWIK;VLYDFVTDDTISPYSR;VSREEFEWVYTDQPHAAR		0.973976	1.17166	1.05132	1.02128	0.982826	1.00111	1.26042	1.36585	1.26159	1.09166	1.01252	1.17539	1.28688	1.12599	1.01656	1.68166	2.21132	1.55405	0.843407	1.0439	0.852184	1.00674	1.25347	1.14187	1.17309	1.1419	1.09351
sp|Q3THK7|GUAA_MOUSE	32	AC[+57.0214635]TTEEDQEK;ALNQDQVIAVHIDNGFMR;DEPDWESLIFLAR;EEIVLLTHGDSVDK;EEIVLLTHGDSVDKVADGFK;ELDLPEELVSR;ELDLPEELVSRHPFPGPGLAIR;ELFVQSEIFPLETPAFAIK;EPPTDVTPTFLTTGVLSTLR;ESQSVEEALKK;GLQKEEIVLLTHGDSVDK;HPFPGPGLAIR;IMYDLTSKPPGTTEWE;ISQMPVILTPLHFDR;ISQMPVILTPLHFDRDPLQK;KLYGVQFHPEVGLTENGK;LMQITSLHSLNAFLLPIK;LYGVQFHPEVGLTENGK;NFLYDIAGC[+57.0214635]SGNFTVQNR;QADFEAHNILR;SGNIVAGIANESK;SGNIVAGIANESKK;SVRE…		6.18887	6.15263	6.22877	5.39545	5.39085	5.35406	5.14792	5.29067	5.18451	6.15696	6.24101	6.28709	5.36159	5.30066	5.35519	5.18685	5.15158	5.19097	6.06843	6.10557	6.09859	5.33973	5.48355	5.56515	5.10966	5.30479	5.31066
sp|Q8BVE3|VATH_MOUSE	13	EQTVQYILTMVDDMLQENHQR;GAVDAAVPTNIIAAK;LLEVSDDPQVLAVAAHDVGEYVR;LMVHNWEYLGK;QDPFTVHMAAR;QEYALAMIQC[+57.0214635]K;QLENLEQQKYDDEDISEDIK;QLQSEQPQTAAAR;QLVMNHMHHEDQQVR;SSEDKQEMLQTEGSQC[+57.0214635]AK;STAWPYFLPMLNR;TFINLMTHISK;YNALLAVQK		2.91896	3.00116	3.15105	3.01598	2.99973	3.0489	3.41819	3.48289	3.50736	3.08415	3.07312	3.22319	3.32967	3.18831	3.07478	3.76144	4.08106	3.87703	3.13193	3.26202	3.14728	3.12946	3.0543	3.05798	3.44939	3.45087	3.54118
sp|Q9D4H8|CUL2_MOUSE	18	AVVMLEYVER;DTPQELEQTR;ELQDSTQMNEK;FVQLINTVLNGDQHFMSALDK;FYQGIFVSPFLTETGEYYK;GADYMDC[+57.0214635]LYR;GMTENEVEDK;GMTENEVEDKLTSFITVFK;HNALIQEVISQSR;KLTWLHYLC[+57.0214635]TGEVK;LMVEPLQNILIR;LTSFITVFK;MYLQAAIVR;SVQMFELFYSQHFSGR;VIHEC[+57.0214635]QQR;VIHGVINSFVHVEQYK;VLESEEQVLVMYHR;VVDFDETWNK		3.78905	3.79164	3.8129	3.34937	3.34907	3.29346	2.978	2.98749	3.03236	3.9048	3.89222	3.98682	3.20466	3.18001	3.27733	2.78727	2.54593	2.93894	3.94863	3.95565	3.98794	3.41987	3.29435	3.26789	3.06548	3.01361	3.10379
sp|Q7TMY7|IPO8_MOUSE	7	DAAWYQLLVAPLSEDQKR;ETENDDVTNVIQK;IIVSDHVEFPVR;LIC[+57.0214635]EYSQDVASIAVDTTQHLAEIFGK;VLC[+57.0214635]GEAGEDAEC[+57.0214635]YAAK;VLQQAFNYLNQGVVHAVTWK;VLQSDEYEEIEDK		-1.83577	-1.66113	-1.44319	-2.67869	-2.1567	-2.1226	-2.0151	-2.19286	-1.9992	-1.81554	-1.96954	-2.21636	-3.0388	-2.39387	-2.16156	-2.69591	-2.81056	-2.42235	-1.88684	-2.09201	-1.82907	-2.3228	-2.60607	-2.19851	-2.28371	-2.73962	-2.53985
sp|P28271|ACOC_MOUSE	19	AVLAESYER;FDTDVELTYFHNGGILNYMIR;FFNLNKLEDSR;FVEFFGPGVAQLSIADR;IDFEKEPLGVNAQGR;IIPPGSGIIHQVNLEYLAR;KNDIENILNWNVMQHK;NDIENILNWNVMQHK;NPFAHLAEPLDAAQPGKR;NQDLEFER;QAPQTVHLPSGETLDVFDAAER;SIVDAYVLLNLGDSVTTDHISPAGNIAR;SWNALAAPSEK;TSLSPGSGVVTYYLR;TVVPC[+57.0214635]C[+57.0214635]SGPK;WGSQAFC[+57.0214635]NMR;YLQAVGMFR;YQQAGLPLIVLAGK;YTINIPEDLKPR		2.3141	2.42084	2.55148	3.18582	3.18581	3.17661	4.39802	4.35758	4.3051	2.48763	2.48159	2.50314	3.5282	3.34092	3.36412	4.74132	5.06425	4.80972	1.8314	2.12685	1.95969	3.06348	3.4811	3.29473	4.27724	4.40563	4.51097
sp|Q8BMP6|GCP60_MOUSE	8	DC[+57.0214635]HEEVYAGSHQYPGR;DSLPVIAAPSMWTRPQIK;EDAMVEFVK;EPGEAAAEGAAEEAR;EWAALGNMSKEDAMVEFVK;FDNSYSLWR;QQEVVMAGASLPASSK;VNTAGASDTLSVNGQAK		0.685537	0.538827	0.71126	1.4945	1.38893	1.64085	2.22261	2.17656	2.07111	0.528335	0.619228	0.979929	1.64758	1.70642	1.84648	2.75853	2.96777	2.87954	0.259778	1.04664	0.861739	1.33963	1.61113	2.03542	2.14809	2.00186	1.94826
sp|Q62384|ZPR1_MOUSE	12	AISGLEQDQPTR;EIIVSSFSC[+57.0214635]EHC[+57.0214635]GWNNTEIQSAGR;EVIIMATNC[+57.0214635]ENC[+57.0214635]GHR;FTTLEGLLK;GALTTVEGLISR;IPELDFEIPAFSQK;ITLHITDPSDMTR;NPFTLGDSSNPDQSEK;TEGYEAGLAPQR;TFDQNEELGLNDMK;TFDQNEELGLNDMKTEGYEAGLAPQR;TPQQAEMLGLQAEAPEEK		3.19726	3.23637	3.25904	1.87189	1.76743	1.87688	1.49841	1.5464	1.48871	3.11143	3.25238	3.49019	1.93112	1.8265	1.7094	1.84695	2.02626	1.85948	3.26891	3.37468	3.39464	1.83114	1.82181	2.19775	1.37758	1.40939	1.37454
sp|Q91W50|CSDE1_MOUSE	30	AHSVNGITEEANPTIYSGK;ATNIEVLSNTFQFTNEAR;C[+57.0214635]QGVVC[+57.0214635]AMK;C[+57.0214635]SAC[+57.0214635]NVWR;DKEAEDGIIAYDDC[+57.0214635]GVK;DNFGFIETANHDK;DQFGFINYEVGDSK;DQFGFINYEVGDSKK;DVEGSTSPQIGDK;EIFFHYSEFK;EMGVIAAMR;FLGTVEKEATFSNPK;GDLETLQPGDDVEFTIK;GEVYPFGIVGMANK;GPDNSMGFGAER;GPDNSMGFGAERK;GTVSFHSHSDHR;IKPEIHPEER;LFFHC[+57.0214635]SQYNGNLQDLK;LLPQGTVIFEDISIEHFEGTVTK;LLTSYGFIQC[+57.0214635]S…		5.76456	5.71118	5.79281	4.97772	5.00792	5.00674	4.62191	4.6178	4.59414	5.70859	5.70967	5.72293	4.97631	4.86208	4.88274	4.63888	4.6605	4.66382	5.65649	5.74707	5.71193	4.86336	5.11556	5.19187	4.53996	4.68479	4.62639
sp|P12025|MK_MOUSE	8	DC[+57.0214635]GMGFREGTC[+57.0214635]GAQTQR;EGTC[+57.0214635]GAQTQR;FESWGAC[+57.0214635]DGSTGTK;GSEC[+57.0214635]SEWTWGPC[+57.0214635]TPSSK;GSEC[+57.0214635]SEWTWGPC[+57.0214635]TPSSKDC[+57.0214635]GMGFR;KGSEC[+57.0214635]SEWTWGPC[+57.0214635]TPSSK;YKFESWGAC[+57.0214635]DGSTGTK;YNAQC[+57.0214635]QETIR		-0.159089	-0.262641	-0.414347	5.34351	5.44869	5.27203	6.82651	6.66962	6.66455	-0.0413384	-0.284032	-0.675733	4.96679	4.60932	4.8988	4.4984	3.80425	3.94077	-0.129832	-0.302613	-0.103427	5.30656	5.67443	6.14774	6.14131	6.62339	6.46033
sp|Q9D0C4|TRM5_MOUSE	7	AIEFLSVFR;AVLPEGQDVTSGFSR;ENNYTYEFDFSK;HLIGQVMVDKNPGITSAVNK;MLTADSFDKAELGVLK;NFQMEVLC[+57.0214635]GEENMLTK;VIEDPKDEDSR		1.07582	1.24858	1.18279	0.59044	0.530288	0.427027	0.278202	0.133029	0.12159	1.20729	1.12417	1.16572	0.657083	0.427795	0.0667281	0.280286	0.169539	0.206728	1.18394	1.14438	1.12633	0.748942	0.694573	0.0509124	0.233845	0.303858	0.48814
sp|Q501J6|DDX17_MOUSE	18	C[+57.0214635]TYLVLDEADR;DMVGIAQTGSGK;DWVLNEFR;ELAQQVQQVADDYGK;FVINYDYPNSSEDYVHR;GTAYTFFTPGNLK;LIDFLESGK;LIQLMEEIMAEK;LIQLMEEIMAEKENK;LMQLVDHR;LTPYEVDELRR;NFYVEHPEVAR;SGKAPILIATDVASR;SQPERDWVLNEFR;SSQSSSQQFSGIGR;TLAYLLPAIVHINHQPYLER;TTSSANNPNLMYQDEC[+57.0214635]DRR;VLEEANQAINPK		5.93715	5.95184	5.96943	6.00911	5.93012	5.90054	5.86917	6.03043	5.86535	5.83992	5.91543	6.03566	6.03805	5.89141	5.9195	6.01668	6.42278	5.96119	5.9118	6.06233	5.89341	5.85479	5.96302	6.09628	5.6989	5.91421	5.95026
sp|Q9DCN2-2|NB5R3_MOUSE;sp|Q9DCN2|NB5R3_MOUSE	11	APDAWDYSQGFVNEEMIR;AVLKDPNDHTVC[+57.0214635]YLLFANQSEK;DILLRPELEELR;FALPSPQHILGLPIGQHIYLSTR;IDGNLVIRPYTPVSSDDDK;IDGNLVIRPYTPVSSDDDKGFVDLVVK;LIDKEVISPDTR;MSQYLENMK;STPAITLENPDIK;STPAITLENPDIKYPLR;SVGMIAGGTGITPMLQVIR		4.40835	4.38337	4.43284	5.23152	5.1211	5.16831	5.22501	5.36333	5.34284	4.3042	4.46002	4.64058	5.18251	5.08747	5.27144	5.41328	5.51675	5.54588	4.491	4.47998	4.38422	5.17279	5.12652	5.18348	5.33723	5.36548	5.26438
sp|Q8C6G8|WDR26_MOUSE	7	DTTVIIWQVDPDTHLLK;IHVLSGYLMC[+57.0214635]SHAEDLR;LALLNVATQGVHLWDLQDR;NIVQEDHPIMSFTISK;SELPIAELTGHTR;VQC[+57.0214635]LWC[+57.0214635]LSDGK;YLEYLEDGKVLEALQVLR		-1.21576	-1.02409	-0.705468	-0.238298	-0.304099	-0.536338	-0.864607	-1.21704	-0.530368	-0.912821	-0.791888	-0.0778054	-0.17537	-0.586052	-1.94628	-0.930489	-1.34328	-0.550314	-0.679584	-0.466275	-0.899723	-0.378376	-0.424893	-3.1805	-0.974096	-0.182391	-0.110759
sp|Q8CHT3|INT5_MOUSE	6	AFLTGVDPILGHQLSAR;AVLQLLVEGALHR;EELDNMLNLAVHLVSQASGTGAYR;EGC[+57.0214635]WGAPTLSPEAAK;EQPLLFELLK;IASVVGILGHLASR		0.721598	1.15375	1.24566	1.01514	0.878885	1.08973	0.515032	0.625249	0.697634	0.894868	0.986016	1.08596	1.11766	0.823683	0.287718	0.420806	0.740353	0.575324	0.914645	0.959813	1.06949	0.876024	0.977113	0.0828584	0.196924	0.840034	0.777611
sp|Q61164|CTCF_MOUSE	8	C[+57.0214635]DQC[+57.0214635]DYAC[+57.0214635]R;C[+57.0214635]PDC[+57.0214635]DMAFVTSGELVR;C[+57.0214635]SMC[+57.0214635]DYASVEVSK;EGLAESEPMIC[+57.0214635]HTLPLPEGFQVVK;FHC[+57.0214635]PHC[+57.0214635]DTVIAR;TFQC[+57.0214635]ELC[+57.0214635]SYTC[+57.0214635]PR;YALIQHQK;YHDPNFVPAAFVC[+57.0214635]SK		2.01691	1.62526	1.97254	1.34875	1.55958	1.25585	1.0156	0.388696	0.80459	1.59292	1.21695	0.449893	1.5735	1.52385	1.65799	0.806499	0.0576224	0.229761	1.11862	1.20323	1.68404	0.982279	1.65573	1.6936	0.685137	0.413189	0.428279
sp|Q9D0R2|SYTC_MOUSE	33	AELNPWPEYINTR;C[+57.0214635]GPLIDLC[+57.0214635]R;DQELYFFHELSPGSC[+57.0214635]FFLPK;EQFALKPMNC[+57.0214635]PGHC[+57.0214635]LMFDHRPR;ETLLEMFK;FEDEEAQAVYWHSSAHIMGEAMER;FLGDIEIWNQAEK;FMADTDLDPGC[+57.0214635]TLNK;FMADTDLDPGC[+57.0214635]TLNKK;FNLTYVSHDGDDK;FNLTYVSHDGDDKK;FQQDDAHIFC[+57.0214635]AMEQIEDEIK;GAYIYNTLMEFIR;GFQEVVTPNIFNSR;ILNEKVNTPTTTVYR;IYGISFPDPK;LADFGVLHR;LADFGVLHRNELSGALTGLTR;LKAEHDSI…		6.53977	6.49787	6.6353	5.29943	5.24632	5.24214	5.4455	5.45612	5.39213	6.58159	6.53986	6.6408	5.36716	5.28281	5.32127	5.82782	5.81822	5.95083	6.53413	6.5347	6.54775	5.27147	5.20035	5.22933	5.38788	5.34494	5.36605
sp|P80318|TCPG_MOUSE	36	AMTGVEQWPYR;AVAQALEVIPR;EDDVGTGAGLLEIK;EIQVQHPAAK;ELGIWEPLAVK;EMMLSIINSSITTK;GASKEILSEVER;GESQTDIEITR;GISDLAQHYLMR;GVMINKDVTHPR;HTQESC[+57.0214635]ETWGVNGETGTLVDMK;IDDIVSGHK;IDDIVSGHKK;IGDEYFTFITDC[+57.0214635]K;IGDEYFTFITDC[+57.0214635]KDPK;IPGGIIEDSC[+57.0214635]VLR;ISTPVDVNNR;ISTPVDVNNREMMLSIINSSITTK;IVLLDSSLEYK;IVLLDSSLEYKK;IVSRPEELREDDVGTGAGLLEIK;KGESQTDIEITR;KIGDEYFTFITDC[+57.0214635]K;KIST…		8.40654	8.49509	8.56198	7.63183	7.71337	7.60447	7.28782	7.40333	7.35743	8.44223	8.42584	8.62056	7.58441	7.54965	7.6504	7.42434	7.50402	7.42252	8.3711	8.46033	8.54744	7.56692	7.62519	7.75051	7.20892	7.35895	7.3739
sp|Q9QYJ0|DNJA2_MOUSE	11	DGNDLHMTYK;EGSGGGGGMDDIFSHIFGGGLFGFMGNQSR;EISFAYEVLSNPEK;ELYDRYGEQGLR;EYHPDKNPNAGDK;FDVQFPENNWINPDK;GEDMMHPLK;IGLVEALC[+57.0214635]GFQFTFK;LYDILGVPPGASENELKK;NVLC[+57.0214635]SAC[+57.0214635]SGQGGK;VSLEDLYNGK		4.59045	4.48679	4.52398	3.94772	3.83551	3.76591	3.6452	3.35451	3.62584	4.45833	4.21127	4.09337	3.9207	3.63392	3.68878	3.64638	3.13726	3.6785	4.24719	4.22438	4.41368	3.776	3.89731	3.9774	3.66254	3.55604	3.43506
sp|Q80UW2|FBX2_MOUSE	7	C[+57.0214635]QQEGLVPEGSADEER;DHWQQFYFLSK;ELVDGAPLWLLK;FEHGGQDSVYWK;NPC[+57.0214635]GEEDLEGWSDVEHGGDGWR;TDAGSLYELTVR;VEELPGDNGVEFTQDDSVKK		-0.961915	-0.908402	-0.9099	1.44756	1.31136	1.30653	1.42906	1.16007	1.2388	-0.198968	-0.157457	-0.398947	1.01395	0.858764	0.883933	0.386246	-0.00543026	0.480507	0.437287	0.648295	0.582145	0.760774	0.971176	1.18198	0.798798	0.9946	0.833753
sp|Q8VEE4|RFA1_MOUSE	19	ADYFSTVAAVVFLR;ATAFNEQVDK;ATAFNEQVDKFFPLIEVNK;ATVMDVKPVDFR;AYGASKPFGKPAGTGLLQPSGGTQSK;ENC[+57.0214635]MYQAC[+57.0214635]PTQDC[+57.0214635]NK;ENC[+57.0214635]MYQAC[+57.0214635]PTQDC[+57.0214635]NKK;FFPLIEVNK;GWFDSEGQALDGVSISDHR;LETYNDESR;LFSLELVDESGEIR;NEQAFEEVFQNANFR;NIYLMDMSGK;SGGAGGGNTNWK;SLSVLSSSTVIVNPDIPEAYKLR;VIDQQNGLYR;VKLETYNDESR;VVPIASLTPYQSK;VVTTTLWGEDADKFDGSR		5.7229	5.67717	5.73836	5.19538	5.17665	5.2181	4.50457	4.60802	4.49598	5.72301	5.823	5.95027	5.23776	5.04226	5.03081	4.1722	4.43133	4.26582	5.81334	5.97639	5.87939	5.25314	5.34088	5.42246	4.50781	4.79905	4.70007
sp|Q9WUA3|PFKAP_MOUSE	15	DLLFQPVAELK;EIGWADVGGWTGQGGSILGTKR;EWSGLLEELAR;FVSDDSIC[+57.0214635]VLGIC[+57.0214635]K;IIEVVDAIMTTAQSHQR;LNIIIVSEGAIDMQNKPITSEK;LPLMEC[+57.0214635]VQMTQDVQK;MFAIYDGFEGFANGQIK;MGVEAVIALLEATPETPAC[+57.0214635]VVSLR;NGDIDNDTVQK;NVLGHMQQGGAPSPFDR;RFEGNLNTYK;YEASYDMSDSGK;YEASYDMSDSGKLESLQHHEEL;YLEHLSGDGK		4.28556	4.43726	4.47205	2.14565	2.04219	2.17895	1.30191	1.20559	0.986764	4.41798	4.45737	4.52429	2.34882	2.10057	1.94865	1.6406	1.78973	1.67634	4.66171	4.87834	4.92391	2.46842	2.44896	2.07622	1.25547	1.67035	1.10364
sp|Q61656|DDX5_MOUSE	21	DGWPAMGIHGDK;DWVLNEFK;EANQAINPK;ELAQQVQQVAAEYC[+57.0214635]R;FVINYDYPNSSEDYIHR;LIDFLEC[+57.0214635]GK;LIDFLEC[+57.0214635]GKTNLR;LMEEIMSEK;LMEEIMSEKENK;NFYQEHPDLAR;QVSDLISVLR;RTAQEVDTYR;TAQEVDTYR;TAQEVDTYRR;TGTAYTFFTPNNIK;TGTAYTFFTPNNIKQVSDLISVLR;TLSYLLPAIVHINHQPFLER;TTYLVLDEADR;TTYLVLDEADRMLDMGFEPQIR;WNLDELPK;WNLDELPKFEK		8.01173	7.99936	8.00158	7.55151	7.48472	7.40466	6.97947	7.08348	6.97377	7.93975	7.97706	7.98088	7.49875	7.33921	7.42281	7.05407	7.14552	6.9119	7.99708	8.05113	7.95957	7.45981	7.53437	7.59088	6.91235	7.1115	7.03885
sp|P11157|RIR2_MOUSE	12	APTNPSVEDEPLLR;DEGLHC[+57.0214635]DFAC[+57.0214635]LMFK;DIQHWEALKPDER;EYLFNAIETMPC[+57.0214635]VK;FSQEVQVTEAR;FVVFPIEYHDIWQMYK;GLMPGLTFSNELISR;HLVHKPAEQR;IEQEFLTEALPVK;LMLELGFNK;TPLATIADQQQLQLSPLKR;VENPFDFMENISLEGK		4.2155	4.2602	4.36952	2.37487	2.19233	2.36818	1.56311	1.66916	1.61695	4.37447	4.30146	4.47096	2.21686	2.18992	2.13594	1.88829	1.84268	1.83161	4.44772	4.53542	4.44373	2.30663	2.03201	2.35621	1.43956	1.81199	2.08737
sp|Q61024|ASNS_MOUSE	20	ADWLTHYWMPK;AMTEDGFLAVC[+57.0214635]SEAK;APSPEKAEEESER;ASVGMYLISK;DTYGVRPLFK;EAFSDGITSVK;ELYLFDVLR;ETFEDC[+57.0214635]NLLPK;FENVNGYTNC[+57.0214635]C[+57.0214635]FGFHR;FSSYYLSLPPDMR;IGC[+57.0214635]LLSGGLDSSLVAASLLK;ILQDYVEHQVDDEMMSAASQK;LAVVDPLFGMQPIR;LFPGFDLETVK;NTDSVVIFSGEGSDELTQGYIYFHK;TIC[+57.0214635]MLDGVFAFILLDTANKK;TTAAHGLELR;VEPFLPGHYEVLDLKPNGK;WINATDPSAR;YHHC[+57.0214635]TDEPLHAIYDSVEK		6.73092	6.86389	6.98682	6.19041	6.21355	6.19813	5.16541	5.13713	5.37361	6.79066	6.75319	6.95761	6.176	5.99589	5.90466	5.24775	5.35778	5.35404	6.7694	6.87884	6.94043	6.09618	6.16942	5.96219	5.39989	5.22536	5.30352
sp|Q5SUF2-2|LC7L3_MOUSE;sp|Q5SUF2-3|LC7L3_MOUSE;sp|Q5SUF2|LC7L3_MOUSE	8	IDVLLQQIEELGSEGK;IDVLLQQIEELGSEGKVEEAQGMMK;LALSQNQQSSGAAGPTGK;LALSQNQQSSGAAGPTGKNEEK;LVEQLKEER;STTSTIESFAAQEK;WDHESVC[+57.0214635]K;YLQSLLAEVER		3.21851	3.18717	3.14176	2.54858	2.54751	2.50621	2.67819	2.78535	2.58651	3.22889	3.23602	3.49298	2.547	2.44111	2.56974	2.65539	2.36419	2.74077	3.2067	3.05952	3.24355	2.52127	2.54314	2.76849	2.50072	2.66303	2.62927
sp|Q8K4L0|DDX54_MOUSE	9	AGLTEPVLIR;ELDLAELGLHPLFSSC[+57.0214635]FEEGELQR;LFEMGFAEQLQEIIGR;MEDQFAALHENPDIIIATPGR;SGGFQSMGLSYPVFK;TAC[+57.0214635]FLLPMFER;TIPVILDGKDVVAMAR;VANNAQQQYVR;VPQSVVDDEDSSLQTAMGASLDLQGLHR		2.57427	2.51646	2.59031	1.28643	1.56719	1.42229	0.767172	1.04615	1.11281	2.45611	2.49243	2.53571	1.57136	1.5477	1.6859	0.968568	0.839124	1.07812	2.38443	2.27928	2.6395	1.47603	1.71703	1.75024	0.825647	0.973406	1.07455
sp|Q03145|EPHA2_MOUSE	7	DGEFSVLQLVGMLR;EVVLLDFAAMK;FADIVSILDK;GELGWLTHPYGK;VLEDDPEATYTTSGGK;VLEDDPEATYTTSGGKIPIR;WTAPEAISYR		2.45299	2.51807	2.66672	0.46579	0.580276	0.447318	0.0577374	-0.308947	0.296522	2.44702	2.49884	2.90253	0.255645	0.256993	0.134818	1.23811	1.27772	1.41704	2.74716	2.7532	2.76375	0.569168	0.424788	0.563981	0.782515	0.52706	0.193252
sp|Q8BP48|MAP11_MOUSE	11	AGVTTEEIDHAVHLAC[+57.0214635]IAR;EVLDIAAGMIK;HAQANGFSVVR;KLVQTTYEC[+57.0214635]LMQAIDAVKPGVR;LFHTAPNVPHYAK;LGIQGSYFC[+57.0214635]SQEC[+57.0214635]FK;LLSSEDIEGMR;LVQTTYEC[+57.0214635]LMQAIDAVKPGVR;SAQFEHTLLVTDTGC[+57.0214635]EILTR;SC[+57.0214635]C[+57.0214635]TSVNEVIC[+57.0214635]HGIPDR;VC[+57.0214635]ETDGC[+57.0214635]SSEAK		3.7833	3.82326	3.80507	3.21949	3.30432	3.20059	3.2144	3.14755	3.26448	3.65763	3.472	3.2834	3.45386	3.37082	3.34927	3.36975	3.51908	3.24017	3.39378	3.4771	3.59059	2.99743	3.41776	3.33442	3.03942	3.01376	3.06043
sp|P61965|WDR5_MOUSE	8	DGSLIVSSSYDGLC[+57.0214635]R;FSPNGEWLASSSADK;FSPNGEWLASSSADKLIK;IWDTASGQC[+57.0214635]LK;IWGAYDGKFEK;LGISDVAWSSDSNLLVSASDDKTLK;TLPAHSDPVSAVHFNR;YILAATLDNTLK		3.86228	3.86094	3.83483	3.21148	3.15291	2.87156	2.34485	2.32158	2.35677	3.61976	3.56188	3.31898	3.23969	2.99036	3.08617	2.27344	1.94083	2.24227	3.71221	3.75834	3.92258	3.09473	3.36157	3.42368	2.2181	2.31104	2.15399
sp|Q80UM3|NAA15_MOUSE	17	AIELATTLDGSLTNR;ASWIGYAIAYHLLEDYEMAAK;EAGLYREALEHLC[+57.0214635]TYEK;GC[+57.0214635]PPVFNTLR;GELLLQLC[+57.0214635]R;HFIEITDDQFDFHTYC[+57.0214635]MR;KEEAYELVR;LAVEETKGELLLQLC[+57.0214635]R;LEDAADVYR;LHDNPLTDENKEHEADTANMSDK;MVYYLDSSSQK;MVYYLDSSSQKR;NFNETFLKR;RLPLNFLSGEK;SYVDLLKLEDVLR;WMDEAQALDTADR;WMDEAQALDTADRFINSK		3.84735	3.837	3.71456	3.09586	3.23806	3.12853	2.86733	2.79338	2.98058	3.73524	3.74236	3.72591	3.00897	2.91226	3.2751	3.05474	2.9435	2.89662	3.70401	3.70971	3.74506	3.09612	3.09292	3.27431	2.88577	2.75842	2.91712
sp|Q8BUI3|LRWD1_MOUSE	10	ATSQTVATC[+57.0214635]GGEAVC[+57.0214635]VIDC[+57.0214635]QTGLVLHK;DTASTC[+57.0214635]SQVENLDR;ELDLSNNLLETLPANLGLSHLR;FIATVSPEEETDKVR;IQSLNLSGLQLLSEHLDPNLLGR;NLVLC[+57.0214635]GDEEGSVWIYDVEHLLK;QSVLPVVILVR;VC[+57.0214635]EVNFIFSEDSK;VPVEHPQAAGASK;WNMLAAAGLR		2.71949	2.77183	2.85722	1.75282	1.804	1.91737	1.09919	1.13059	1.22493	2.68882	2.57258	2.81081	1.92877	1.91302	1.5882	0.878379	1.08857	1.00343	2.63286	2.78548	2.78516	1.83906	2.10166	1.7337	1.11185	1.42394	1.3254
sp|P28474|ADHX_MOUSE	12	AAVAWEAGKPLSIEEIEVAPPK;AAVAWEAGKPLSIEEIEVAPPKAHEVR;AGDTVIPLYIPQC[+57.0214635]GEC[+57.0214635]K;AKEFGASEC[+57.0214635]ISPQDFSK;EFGASEC[+57.0214635]ISPQDFSK;IIGIDINK;IIGIDINKDK;LKAGDTVIPLYIPQC[+57.0214635]GEC[+57.0214635]K;SIQEVLVEMTDGGVDYSFEC[+57.0214635]IGNVK;VC[+57.0214635]LLGC[+57.0214635]GISTGYGAAVNTAK;VEPGSTC[+57.0214635]AVFGLGGVGLAVIMGC[+57.0214635]K;VEPGSTC[+57.0214635]AVFGLGGVGLAVIMGC[+57.…		6.34451	6.28802	6.38733	5.63738	5.63854	5.56475	5.69342	5.63267	5.69167	6.2103	6.0408	5.63339	5.71728	5.59764	5.66814	5.62649	5.25721	5.57418	5.96336	6.06457	6.26933	5.30614	5.73342	5.73063	5.59807	5.74158	5.69668
sp|Q3UYV9|NCBP1_MOUSE	20	ANNYNEAVYLVR;ATNDEIFSILK;C[+57.0214635]ETDGTSILTPWYK;DGALEEQIER;DVPNPNQVDDDDEGFR;FIMILTEHLVR;FINWFSHHLSNFQFR;FVIEENLHC[+57.0214635]IIK;IEVFVQTLLHLAAK;IFSTTESYLK;LDTMSTTC[+57.0214635]VDR;LFVWEILHSTIR;LQPGSLPQVLAQATEMLYMR;LTIYTTLVGLLNAR;MFDYTDDPEGPVMPGSHSVER;NHPQMIAVLVDK;NLFLVIFQR;NYNFGGEFVEAMIR;TC[+57.0214635]AAQLVSYPGK;WSWEDWSDC[+57.0214635]LTQDLESPKPK		3.98269	4.10142	4.07454	3.69408	3.75597	3.86634	3.62478	3.55541	3.57014	4.12168	4.0547	3.89539	3.78203	3.55076	3.59197	3.44761	3.30397	3.48887	3.91374	3.88544	3.96503	3.72073	3.76674	3.66195	3.40646	3.58602	3.62729
sp|Q99KK7|DPP3_MOUSE	19	AGLLALEFYTPEAANWR;EGVTTYFSGDC[+57.0214635]TMEDAK;ELPWPLAFEK;FSTIASSYEEC[+57.0214635]R;GAFNFDKETVINPETGEQIQSWYR;GEFEGFVAMVNK;GPSFDVQVGLHELLGHGSGK;LAQDFLDSQNLSAYNTR;LASVLNTDPALDSELTSK;LASVLNTDPALDSELTSKLK;LEGSEVQLVEYEASAAGLIR;LTFLEEEDKDLYIR;LVASAEQLLK;LYAHHLSR;NVSLGNVLAVAYAAK;NVSLGNVLAVAYAAKR;RYEFQGNHFQVTR;VLLEAGEGLVTVTPTTGSDGRPDAR;YEFQGNHFQVTR		4.9122	4.99035	5.06977	5.01222	4.98329	4.95032	5.03598	5.12245	4.97703	4.88405	4.90844	5.0102	5.00136	4.86697	4.80797	5.1258	5.13081	5.21296	4.81913	4.89326	4.85868	4.83814	4.92532	4.86137	4.69317	4.94227	5.07229
sp|Q9DBJ1|PGAM1_MOUSE	12	ALPFWNEEIVPQIK;ALPFWNEEIVPQIKEGK;FSGWYDADLSPAGHEEAK;FSGWYDADLSPAGHEEAKR;HGESAWNLENR;NLKPIKPMQFLGDEETVR;NLKPIKPMQFLGDEETVRK;RSYDVPPPPMEPDHPFYSNISK;SYDVPPPPMEPDHPFYSNISK;TLWTVLDAIDQMWLPVVR;YADLTEDQLPSC[+57.0214635]ESLK;YADLTEDQLPSC[+57.0214635]ESLKDTIAR		7.06144	6.96688	6.96063	6.13156	5.85721	6.17439	5.59136	5.67298	5.7261	7.07603	7.16243	7.27515	5.92523	6.02155	6.40137	5.97954	5.82582	5.84493	7.41194	7.19554	7.30857	6.44375	5.95433	6.34777	5.79599	5.56622	5.57304
sp|Q91X20|ASH2L_MOUSE	7	DIFEGVYFPAISLYK;EHPDPGSKDPEEDYPK;FGLLDQDLSNIGPAYDNQK;LGWSQPLGNLQAPLGYDK;NGVNQGVAYR;QLGEVELQC[+57.0214635]GIC[+57.0214635]TK;QSSAVSASGNLNGGIAAGSSGK		3.0636	2.91528	3.17983	2.02883	1.8992	2.04331	1.71971	1.69172	1.59429	3.09985	3.09387	3.29013	1.9299	1.82277	1.78073	1.51383	1.46137	1.61799	3.0309	3.12834	3.06422	1.91367	1.88727	2.1705	1.6832	1.7632	1.86286
sp|Q6P1B1|XPP1_MOUSE	17	AFVSGFDGSAGTAIITEEHAAMWTDGR;C[+57.0214635]C[+57.0214635]MPYTPIC[+57.0214635]IAK;EC[+57.0214635]DWLNSYHQTC[+57.0214635]R;GGVTEISAADK;GHIAVSAAVFPTGTK;GSLTFEPLTLVPIQTK;IENVVLVVPAK;MIDVNALTDKEC[+57.0214635]DWLNSYHQTC[+57.0214635]R;NSAESDGMR;QEALEWLIR;QEALEWLIRETEPVSR;QMDNNWTLMK;SAGHHLVPVK;TLSLDEVYLIDSGAQYK;TLSLDEVYLIDSGAQYKDGTTDVTR;TMHFGTPTAYEK;VGVDPLIIPTDYWK		4.37823	4.24391	4.64632	4.63728	4.60979	4.61494	5.03126	5.04233	5.06687	4.54954	4.35783	4.63468	4.98664	4.91952	4.90525	5.84389	6.00189	6.02264	4.26113	4.56627	4.63387	4.61608	4.95036	4.96906	5.04829	4.95954	4.94004
sp|Q9JLB4|CUBN_MOUSE	70	ADYQVAC[+57.0214635]GGELR;ANTEC[+57.0214635]SWIIQVEK;AVPGGC[+57.0214635]GGIFQVSR;C[+57.0214635]DC[+57.0214635]TPDTYGPQC[+57.0214635]ASK;C[+57.0214635]SWTAVTHESK;C[+57.0214635]VDFVEIR;DFQSLQQNVER;DFVEILDGR;DGANSNAPVLSK;DSDAPVQGR;DSSC[+57.0214635]SQGDYLVLR;ETIGPQQGC[+57.0214635]GGYLTEDSK;EVC[+57.0214635]GGDLHGPTGTFTSPNYPNPNPHPR;EYNQAFGNLK;FC[+57.0214635]GSTLPQVIK;FC[+57.0214635]SLSAPR;FC[+57.021463…		1.42844	1.68609	1.27259	6.07589	6.14381	5.94095	6.39106	6.13829	6.41721	2.225	1.94162	2.27155	7.7165	7.52896	7.78086	7.37341	7.36906	7.28034	1.65689	1.59683	1.52379	5.5868	6.12524	5.78327	6.70218	6.16141	5.89053
sp|Q9EP69|SAC1_MOUSE	12	ATDFDVLSYK;ELSAQPEVHR;GIDSEGHAANFVETEQIVHYSGNR;HFDSQVIIYGK;LEEQDEFEK;LSNTSPEFQEMSLLER;NAWADNANAC[+57.0214635]AK;QDSIDLFLGNYSVDELESHSPLSVPR;TNVIQSLLAR;TQLGLLMDGFNSLLR;VGEC[+57.0214635]FNHAVWR;YKPHPQISK		2.27079	2.20855	2.34453	2.84836	2.90203	2.82082	3.0716	3.13714	2.87584	2.32412	2.27599	2.5494	3.06252	2.86246	2.82917	3.23849	3.35672	3.28114	2.37104	2.34222	2.53914	2.94516	3.12	2.93661	3.14167	3.07212	3.11467
sp|Q8VHR5|P66B_MOUSE	9	ALQQEQEIEQR;DLANLEVPHELPTK;ENINDEPVDMSAR;ILC[+57.0214635]EQC[+57.0214635]MTSNQK;LPSRPGAQGIEPQNMR;LQQQAALSPTTAPAVSSVSK;TPVVQNAASIVQPSPAHVGQQGLSK;TTSSAIYMNLASHIQPGTVNR;VEPFVC[+57.0214635]AQC[+57.0214635]R		0.537157	0.275566	0.206981	0.103984	-0.282494	-0.0683192	-0.43942	-0.39623	-0.353385	0.199154	0.557326	0.595823	-0.492318	-0.173767	0.361245	-0.265999	-0.775812	-0.642252	0.664671	0.448032	0.6372	0.27488	-0.36785	0.313778	-0.0873085	-0.48587	-0.423509
sp|Q8R409|HEXI1_MOUSE	3	AENLQLLTENELHR;ASLQSGSRPGQEGEGGLK;GQPVAPYNTTQFLMDDHDQEEPDLK		-2.45772	-2.66105	-2.77764	-2.82518	-2.94823	-2.94608	-2.92333	-2.7188	-3.04112	-2.76259	-2.77287	-2.13956	-3.16747	-2.40548	-2.15386	-2.9423	-3.16328	-2.82887	-2.35208	-2.62177	-2.66576	-2.96923	-3.16279	-2.28527	-3.30095	-3.19507	-3.12079
sp|Q61316|HSP74_MOUSE	50	AESEEMETSQAGSK;AFSDPFVEAEK;AGGIETIANEYSDR;AGGIETIANEYSDRC[+57.0214635]TPAC[+57.0214635]VSFGPK;C[+57.0214635]TPAC[+57.0214635]VSFGPK;DKLSGEYEK;EDIYAVEIVGGATR;EDQYEHLDAADVTK;EFSITDVVPYPISLR;ELSTTLNADEAVTR;ELTSIC[+57.0214635]SPIISKPKPK;ETAESVLK;FDEVLVNHFC[+57.0214635]EEFGK;FFGKELSTTLNADEAVTR;FLEMC[+57.0214635]DDLLAR;FQESEERPK;FQESEERPKLFEELGK;FVSEDDRNTFTLK;IKELTSIC[+57.0214635]SPIISKPKPK;KEDIYAVEIVG…		8.78036	8.73369	8.89559	7.83779	7.77878	7.70868	7.54834	7.53407	7.51717	8.71156	8.65466	8.76736	7.76897	7.63092	7.74316	7.43513	7.47567	7.40395	8.72606	8.78725	8.8062	7.68658	7.87066	7.99074	7.26479	7.46986	7.46121
sp|A2A4P0|DHX8_MOUSE	11	AYRDEMLTTNVPEIQR;DLAEFVISLAEK;EAEMDSIPMGLNK;FSQYFYEAPIFTIPGR;LIVTSATLDAVK;NGAEFTDSLISNLLR;NLVGETNEETSMR;NPDGSLSQAAMMQSALAK;QPEWVVYHELVLTTK;TLIDQQVVYIHPSSALFNR;VTSIMQFGC[+57.0214635]FVQLEGLR		1.65049	1.45312	1.64741	-0.604074	-0.0459461	0.0102062	-0.179615	-0.172059	-0.509843	1.55693	1.51948	1.85211	-0.850385	-0.0593417	-0.150253	-0.17939	-0.615376	-0.239538	1.35069	1.72113	1.76393	-0.637076	-0.0546416	0.167063	-0.27824	-0.664733	-0.187653
sp|Q9WVR4|FXR2_MOUSE	8	AGYTTDESSSSSLHTTR;EITEGDEVEVYSR;IYGETPEAC[+57.0214635]R;KVPGVTAIELGEETC[+57.0214635]TFR;LPPPADYNKEITEGDEVEVYSR;SYLEFSEDSVQVPR;TDGSISGDRQPVTVADYISR;TGGPAYGPSSDPSTASETESEKR		3.14395	3.13587	3.09819	2.05361	1.97348	1.89917	1.90833	1.94028	1.86133	3.04424	3.0944	2.79215	2.12925	2.06905	2.15546	2.14364	2.29315	2.10408	3.05714	3.2609	3.22101	1.83948	2.12797	2.38892	1.84739	1.9518	1.76846
sp|Q9CZD3|GARS_MOUSE	25	AEVSELPNVVR;DLANGNITWADVEAR;EFTMAEIEHFVDPTEK;EFTMAEIEHFVDPTEKDHPK;ELALQPKDDIVDR;GEFTIETEGK;IMYTILEHTFHVR;LGDAVEQGVINNSVLGYFIGR;LLEFNQGKLPFAAAQIGNSFR;LPFAAAQIGNSFR;NGVSHKVDDSSGSIGR;NNIIQAWR;QHFIQEEQILEIDC[+57.0214635]TMLTPEPVLK;QHMENEMAHYAC[+57.0214635]DC[+57.0214635]WDAESK;SC[+57.0214635]YDLSC[+57.0214635]HAR;SSMDSAEELLAPLR;TFFSFPAVVAPFK;TLHVEEVVPSVIEPSFGLGR;TSGHVDKFADFMVK;TSYGWIEIVGC[+57.0214635…		6.86561	6.8831	6.98804	5.90907	5.89134	5.8817	5.46243	5.53708	5.52186	6.90464	6.948	7.12003	5.89999	5.78099	5.74221	5.71392	5.88392	5.73928	6.87821	6.99204	6.93832	5.86552	5.87193	5.93915	5.50646	5.55436	5.53856
sp|P16627|HS71L_MOUSE	3	AFYPEEISSMVLTK;DAGVIAGLNVLRIINEPTAAAIAYGLDK;NQVAMNPQNTVFDAKR		-0.327831	-0.451617	0.0773503	-0.268707	0.052686	-0.111564	0.110168	-0.646149	-0.516312	-0.260526	-0.561498	0.152239	0.116402	0.184351	-0.276354	0.457585	0.878968	0.215658	-0.36164	-0.0863238	0.0458151	0.0483976	0.24575	0.234909	0.00831457	-0.250826	0.270637
sp|Q9D6Z1|NOP56_MOUSE	22	AQLGLGHSYSR;EAVVQAEEAAAEITR;EELASDLEEMATSSAK;EEVASEPEEAASPTTPK;EWYGYHFPELVK;FSEEPEVAANFTK;IDC[+57.0214635]FSEVPTSVFGEK;IVNDNATYC[+57.0214635]R;KFSEEPEVAANFTK;LAALALASSENSSTPEEC[+57.0214635]EEVNEKSK;LEEITMDGAK;LIAHAGSLTNLAK;LKPQENGMEDPPVSLPK;LLLETYLPSK;LSFYETGEIPR;LSFYETGEIPRK;MSQVAPSLSALIGEAVGAR;SSPKEEVASEPEEAASPTTPK;VDNMIIQSISLLDQLDK;VDNMIIQSISLLDQLDKDINTFSMR;YGLIFHSTFIGR;YPASTVQILGAEK		5.95236	5.85919	5.76903	5.00851	5.00661	5.03722	4.75955	4.90169	4.8317	5.91056	5.96192	6.07748	4.99669	5.01905	5.10092	5.02381	4.76222	4.98484	5.9826	5.81528	5.84517	5.31383	4.94293	5.29978	4.96892	4.81625	4.80137
sp|Q6P4T2|U520_MOUSE	82	AALETDENLLLC[+57.0214635]APTGAGK;AIFEIVLNR;ANSNLVLQADR;C[+57.0214635]QLPDGSFR;C[+57.0214635]TLSANLVASGELMSSK;C[+57.0214635]VIMC[+57.0214635]QGSK;DEPTGEVLSLVGK;DEPTGEVLSLVGKLEGTR;DIDAFWLQR;DILC[+57.0214635]GAADEVLAVLK;DMC[+57.0214635]LEKDTLGLFLR;EEASDDDMEGDEAVVR;EEEKLELQK;EEEVTGPVIAPLFPQK;EEEVTGPVIAPLFPQKR;EEGWWVVIGDAK;EEISATQIIVC[+57.0214635]TPEK;EEISATQIIVC[+57.0214635]TPEKWDIITR;EGSASTEVLR;EGSA…		7.25525	7.32001	7.36954	6.96877	6.87971	6.84905	6.63494	6.59049	6.59214	7.25327	7.21556	7.21462	7.0209	6.79836	6.74267	6.59121	6.5904	6.61863	7.187	7.23246	7.29589	6.8694	6.9391	6.93247	6.46768	6.6077	6.63676
sp|P08775|RPB1_MOUSE	27	AEIQELAMVPR;AHNNELEPTPGNTLR;AKQDVIEVIEK;ALQEWILETDGVSLMR;C[+57.0214635]SFEETVDVLMEAAAHGESDPMK;FGVEQPEGDEDLTK;GFVENSYLAGLTPTEFFFHAMGGR;HLALLC[+57.0214635]DTMTC[+57.0214635]R;HMC[+57.0214635]DGDIVIFNR;INISQVIAVVGQQNVEGK;LSGEAFDWLLGEIESK;MSVTEGGIKYPETTEGGRPK;NEQNGAAAHVIAEDVK;NIC[+57.0214635]EGGEEMDNK;NSINQVVQLR;QIFSLIIPGHINC[+57.0214635]IR;QTFENQVNR;SLGTSAGSLVHISYLEMGHDITR;THSTHPDDEDSGPYK;TLPHFIKDDY…		3.68233	3.7582	3.84076	3.11378	3.23085	3.28541	2.84424	2.6196	2.81893	3.63896	3.65465	3.78066	3.19438	3.04979	2.92842	2.89532	3.03195	2.91713	3.51497	3.81482	3.63715	3.18271	3.30624	3.18659	2.65106	2.87347	2.92762
sp|Q9CPV4|GLOD4_MOUSE	18	ALLGYADNQC[+57.0214635]K;DVLGMQVLR;ELPDLEDLMK;ELPDLEDLMKR;ESHSILTPLVSLDTPGK;HEEFEEGC[+57.0214635]K;IYEQDEEK;IYEQDEEKQR;LELQGIQGAVDHAAAFGR;LGNDFMGITLASSQAVSNAR;LLDDAMEADK;LLDDAMEADKSDEWFATR;SLNYWSNLLGMK;SPSQSDPVLK;TMVGFGPEDDHFVAELTYNYGIGDYK;VAEGIFETEAPGGYK;VAEGIFETEAPGGYKFYLQDR;VTLAVSDLQK		4.95749	4.91877	4.99653	4.80125	4.64016	4.69054	4.76167	4.94398	4.75036	4.91881	4.94987	5.17795	4.725	4.61841	4.65851	4.6993	4.79255	4.74419	5.07954	5.10138	5.11337	4.79245	4.70784	4.90876	4.66057	4.8586	4.95812
sp|Q9CX56|PSMD8_MOUSE	5	C[+57.0214635]YYFDYK;DIQTNVYIK;HPVSLEQYLMEGSYNK;LVLLELNFLPTTGTK;VAEFHTELER		2.39179	2.36689	2.42199	2.3655	1.99803	2.30639	1.85929	1.64244	1.9159	2.53769	2.28131	2.24262	2.13444	1.81109	1.52998	2.07641	1.554	1.80505	2.53577	2.216	2.43552	2.41933	1.88789	1.44043	1.79407	1.75506	1.8274
sp|Q64727|VINC_MOUSE	26	AANFENHSGR;AGEVINQPMMMAAR;AIPDLTAPVAAVQAAVSNLVR;AQQVSQGLDVLTAK;AVAGNISDPGLQK;DPNASPGDAGEQAIR;ELLPVLISAMK;ETVQTTEDQILK;GILSGTSDLLLTFDEAEVRK;GQGASPVAMQK;KIDAAQNWLADPNGGPEGEEQIR;KLEAMTNSK;LLAVAATAPPDAPNREEVFDER;MALLMAEMSR;MLGQMTDQVADLR;MSAEINEIIR;MTGLVDEAIDTK;NPGNQAAYEHFETMK;QQELTHQEHR;QVATALQNLQTK;SLGEIAALTSK;SLLDASEEAIKK;VAMANIQPQMLVAGATSIAR;VLQLTSWDEDAWASK;VMLVNSMNTVK;WIDNPTVDDR		3.94667	3.93523	3.84484	4.17629	4.25813	4.46094	4.29499	4.58299	4.55821	3.67295	4.0051	4.17539	3.79904	4.23347	4.41241	4.46007	4.44839	4.48183	3.75782	3.63912	3.80499	4.7515	4.19449	4.72083	4.78152	4.62594	4.76487
sp|Q9ERK4|XPO2_MOUSE	35	AADEEAFEDNSEEYIR;AADEEAFEDNSEEYIRR;ALTLPGSSENEYIMK;ANIVHLMLSSPEQIQK;ATIELC[+57.0214635]STHANDASALR;DAAIYLVTSLASK;DLEGSDIDTR;EHDPVGQMVNNPK;FFEGPVTGIFSGYVNSMLQEYAK;FQSGDFHVINGVLR;FVTAIWNLLVTTGR;GSSTIATAAADK;GSSTIATAAADKIPGLLGVFQK;HGITQANELVNLTEFFVNHILPDLK;HKDAAIYLVTSLASK;IHLAQSLHK;ILFSSLILISK;IPGLLGVFQK;IVEDEPNKIC[+57.0214635]EADR;LLQTDDEEEAGLLELLK;LLTEC[+57.0214635]PPMMDTEYTK;LVLDAFALPLTNLFK;NDIPS…		6.95145	7.03973	7.06776	6.64571	6.83853	6.8971	6.46683	6.44432	6.54971	7.01509	6.96069	7.06976	6.62078	6.44364	6.61467	6.50141	6.49678	6.46837	7.01364	7.00441	7.01814	6.70005	6.62762	6.66308	6.36137	6.4012	6.45568
sp|Q3TX08|TRM1_MOUSE	4	FALEVPGLQSVVANDASAR;FSAAC[+57.0214635]GPPVTPEC[+57.0214635]EHC[+57.0214635]GQR;NVELNGVAHLVQPNQADAR;TAAVGEIC[+57.0214635]EEGLR		1.69784	1.67165	1.91522	0.0861264	-0.000982767	-0.0711824	-0.416796	-0.423223	-0.257303	1.57893	1.45535	1.44137	-0.145773	0.179372	0.266678	-0.28567	-0.363203	-0.309171	1.31688	1.57287	1.74464	-0.627219	0.145496	0.398193	-0.390291	-0.459174	-0.624737
sp|Q91YE5-2|BAZ2A_MOUSE;sp|Q91YE5-3|BAZ2A_MOUSE;sp|Q91YE5|BAZ2A_MOUSE	10	AFSDC[+57.0214635]LTIVEFLHSFGK;EDLTYC[+57.0214635]EHLPDSPEDIPWR;EPLWAAHEVVVEK;GDNDEFLLLC[+57.0214635]DGC[+57.0214635]DR;GESQTPVQGQAR;IMEETSGIEEEEEEENTTAVHGR;LAVLEQNVER;LSGDSEEMSQSPTGLGQPK;MPVGDFFEER;SAAQVC[+57.0214635]LC[+57.0214635]MGQLER		1.14346	1.26685	1.22135	0.398312	0.220844	-0.0179834	-0.830742	-0.768697	-0.835463	0.917846	1.01158	1.27462	0.188794	0.0324305	0.0247053	-0.922159	-0.86428	-0.933853	1.19905	1.2257	1.16961	0.273951	0.0817301	0.439701	-0.818589	-0.509749	-0.682851
sp|P56480|ATPB_MOUSE	26	ADKLAEEHGS;AHGGYSVFAGVGER;AIAELGIYPAVDPLDSTSR;DQEGQDVLLFIDNIFR;DSRLVLEVAQHLGESTVR;EGNDLYHEMIESGVINLK;EGNDLYHEMIESGVINLKDATSK;FLSQPFQVAEVFTGHMGK;FTQAGSEVSALLGR;IGLFGGAGVGKTVLIMELINNVAK;IMDPNIVGNEHYDVAR;IMNVIGEPIDER;IMNVIGEPIDERGPIK;IPSAVGYQPTLATDMGTMQER;IPVGPETLGR;LVLEVAQHLGESTVR;SLQDIIAILGMDELSEEDKLTVSR;TIAMDGTEGLVR;TIAMDGTEGLVRGQK;TREGNDLYHEMIESGVINLK;TVLIMELINNVAK;VALTGLTVAEYFR;VALVYGQMNEPPGAR;…		9.30963	9.38161	9.46088	9.43721	9.36097	9.39948	9.42277	9.49738	9.46767	9.35708	9.45076	9.69418	9.57087	9.44018	9.448	9.65045	9.95729	9.81633	9.48473	9.61937	9.57993	9.59479	9.65169	9.68535	9.46529	9.60544	9.57634
sp|P80316|TCPE_MOUSE	25	C[+57.0214635]PTLEQYAMR;DGDVTITNDGATILSMMDVDHQIAK;DVDFELIKVEGK;EKFEEMIK;ESNPALGIDC[+57.0214635]LHK;GSNDMQYQHVIETLIGK;GSNDMQYQHVIETLIGKK;GVIVDKDFSHPQMPK;HKLDVMSVEDYK;IADGYEQAAR;IAILTC[+57.0214635]PFEPPKPK;IDDIRKPGESEE;KQQISLATQMVR;LDVMSVEDYK;LGFAGVVQEISFGTTK;LGFAGVVQEISFGTTKDK;LMGLEALKSHIMAAK;QMAEIAVNAVLTVADMER;QMAEIAVNAVLTVADMERR;QQISLATQMVR;SLHDALC[+57.0214635]VIR;TSLGPNGLDK;VLVDINNPEPLIQTAK;VVY…		7.58118	7.59746	7.6856	6.95821	6.74188	6.78507	6.48903	6.49688	6.52562	7.62273	7.61606	7.64505	6.82835	6.64438	6.76142	6.59044	6.53516	6.58258	7.70331	7.67518	7.63062	6.94198	6.74376	6.94012	6.52161	6.61401	6.55786
sp|P35564|CALX_MOUSE	27	AEEDEILNR;APVPTGEVYFADSFDR;APVPTGEVYFADSFDRGSLSGWILSK;C[+57.0214635]ESAPGC[+57.0214635]GVWQRPMIDNPNYK;C[+57.0214635]ESAPGC[+57.0214635]GVWQRPMIDNPNYKGK;C[+57.0214635]GEDYKLHFIFR;DDTDDEIAK;DEEEEEEKLEEK;EIEDPEDRKPEDWDERPK;GSLSGWILSK;IADPDAVKPDDWDEDAPSK;IPNPDFFEDLEPFK;KDDTDDEIAK;KPEDWDERPK;LPGDKGLVLMSR;QKSDAEEDGVTGSQDEEDSKPK;QSNAMEYK;SDAEEDGVTGSQDEEDSKPK;SDASTPPSPK;SKSDASTPPSPK;TAELSLDQFHDK;TAELSLDQ…		5.84327	5.73935	5.75957	6.01875	5.8744	5.85036	5.94664	6.14311	6.06745	5.83564	6.02675	6.04844	6.00551	6.07949	6.25866	6.49434	6.4758	6.52396	6.09933	5.96184	5.90227	6.29308	6.01915	6.43471	6.48693	6.28612	6.07373
sp|P09103|PDIA1_MOUSE	33	DHENIIIAK;EADDIVNWLK;EADDIVNWLKK;EYTAGREADDIVNWLK;FDEGRNNFEGEITK;GKILFIFIDSDHTDNQR;HNQLPLVIEFTEQTAPK;IKPHLMSQEVPEDWDK;IKPHLMSQEVPEDWDKQPVK;ILEFFGLKK;ILFIFIDSDHTDNQR;KSNFEEALAAHK;LAKVDATEESDLAQQYGVR;LGETYKDHENIIIAK;LITLEEEMTK;LKAEGSEIR;MDSTANEVEAVK;MDSTANEVEAVKVHSFPTLK;NGDTASPKEYTAGR;NNFEGEITK;NNFEGEITKEK;NVFVEFYAPWC[+57.0214635]GHC[+57.0214635]K;QFLLAAEAIDDIPFGITSNSGVFSK;SNFEEALAAHK;SVSDYDGKLSSFK…		6.6986	6.61186	6.63504	7.55856	7.24865	7.34315	8.01678	7.97619	7.9227	6.60814	6.6854	6.85879	7.77087	7.64522	7.81437	9.35513	9.4836	9.36414	6.84287	6.76584	6.72865	7.61297	7.28083	7.42697	8.26092	7.97833	7.84444
sp|Q08288|LYAR_MOUSE	16	AQGGQASEEGADR;DFWGDDYK;ELLQQISAFDNVPR;HVSNC[+57.0214635]RNC[+57.0214635]EC[+57.0214635]LSC[+57.0214635]IDC[+57.0214635]GK;LENHQENLR;LPEQPEEGEAK;LPEQPEEGEAKDHEAPSK;MVFFTC[+57.0214635]NAC[+57.0214635]GESVK;NC[+57.0214635]EC[+57.0214635]LSC[+57.0214635]IDC[+57.0214635]GK;NC[+57.0214635]EC[+57.0214635]LSC[+57.0214635]IDC[+57.0214635]GKDFWGDDYK;NGGPGEDAAEGQTK;NQEAGHEAAGEEAAEASGPPEK;NQEAGHEAAGEEAAEASGP…		4.41392	4.14607	4.30319	2.95395	2.79868	2.80811	1.79708	1.77356	1.64384	4.20299	4.18686	4.35796	2.64421	2.78751	2.92898	1.80271	1.48034	1.53387	4.22383	4.24017	4.24254	2.84938	2.9032	3.41547	1.77994	1.78035	1.72514
sp|Q6P1F6|2ABA_MOUSE	5	IWDLNMENRPVETYQVHEYLR;LFEEPEDPSNR;NAAQFLLSTNDK;VPVFRPMDLMVEASPR;VVIFQQEQENK		4.09705	4.13995	4.28133	3.83405	3.75977	3.93136	3.75812	3.91455	3.73242	4.08275	4.164	4.44737	3.93269	3.74951	3.73089	3.84049	4.1083	3.84249	4.06429	4.18208	4.18147	3.82588	3.93201	3.97271	3.633	3.88861	3.86493
sp|Q6ZQ88|KDM1A_MOUSE	23	C[+57.0214635]DAVLC[+57.0214635]TLPLGVLK;EKDEMVEQEFNR;EYDELAETQGK;EYDELAETQGKLEEK;GELFLFWNLYK;GIFGSSAVPQPK;HGLINFGIYK;HWDQDDDFEFTGSHLTVR;IADQFLGAMYTLPR;IQLTFEATLQQLEAPYNSDTVLVHR;LQELEANPPSDVYLSSR;MTSQEAAC[+57.0214635]FPDIISGPQQTQK;NGYSC[+57.0214635]VPVALAEGLDIK;NYPATVHGALLSGLR;QATPGVPAQQSPSM;QLQSFGMDVTLLEAR;QQPPAVQFVPPLPEWK;STSQTFIYK;TLQLWLDNPK;TQEELKELLNK;VFWDPSVNLFGHVGSTTASR;VIIIGSGVSGLAAAR;YTA…		4.60533	4.5675	4.83773	4.18826	4.18129	4.12804	4.05166	3.92128	3.9566	4.63021	4.44592	4.66177	4.25756	4.11763	4.09668	3.77152	3.60602	3.80568	4.51005	4.6414	4.68984	4.14314	4.32383	4.17846	3.84638	4.0383	4.05909
sp|P17426-2|AP2A1_MOUSE;sp|P17426|AP2A1_MOUSE	15	AADLLYAMC[+57.0214635]DR;ALQVGC[+57.0214635]LLR;ANHPMDAEVTK;DFLTPPLLSVR;FFQPTEMAAQDFFQR;ILVAGDSMDSVK;LEPNAQAQMYR;MYLFYGNK;NPTFMC[+57.0214635]LALHC[+57.0214635]IANVGSR;NSGVLFENQLLQIGVK;THIDTVINALK;TSVQFQNFLPTVVHPGDLQTQLAVQTK;TVFEALQAPAC[+57.0214635]HENMVK;YGGTAQSLTLK;YLETADYAIR		3.58802	3.60849	3.74699	3.70853	3.82948	3.72661	3.53852	3.62263	3.60736	3.64225	3.55923	3.8898	3.69249	3.6773	3.9114	4.01147	3.9327	4.07047	3.49729	3.59968	3.66641	3.60476	3.57111	3.83567	3.65514	3.40062	3.55685
sp|Q62018|CTR9_MOUSE	9	AYTIDPSNPMVLNHLANHFFFK;DLITQATLLYTMADK;EATADISDVWLNLAHIYVEQK;FDLALAASEAR;GDKENASQC[+57.0214635]FEK;IIMYDQNHLLGR;LYEAMC[+57.0214635]EFHEAEK;NLYAANGIGAVLAHK;QC[+57.0214635]SDLLSQAQYHVAR		1.76078	1.80538	1.80565	1.63828	1.69567	1.43972	1.37359	1.46039	1.46036	1.72647	1.79337	1.92862	1.79627	1.73758	1.70795	1.15285	1.12065	1.26322	1.83626	1.80264	1.66812	1.91892	1.8305	1.91504	1.16091	1.29022	1.47742
sp|Q6PR54-3|RIF1_MOUSE;sp|Q6PR54|RIF1_MOUSE	39	AQMSTEIDSAR;ASQGLISAVENSESDSSEAKEEVSR;ATALVYPEELKPILR;C[+57.0214635]VDSSFVSLPVPESNLR;DASDAVVSAIWK;FASDLIEPVTLDTPLSK;GATALEMGMPLLLQK;GFLSPGSQSSK;GLEEIPIFDISEK;GSASPGLSPLTPGHK;IVLSLEPLEHPLISSPSFFSK;KTDLQVPETAPETR;LGTMANSIIR;LIEQAPVQMGEESVR;LTDESPIQENLTEK;LTDESPIQENLTEKGNTLPER;LVIPLVVHSAQK;MTGEEGKEVIAEIEK;MVSSIIDSLEVILSK;NDAFVAADSEK;QLSENGELDISDVGK;RKPDLENVSSEGGGGTLDNLDK;SDSENLANAGK;SEAVDSC[+57.0214…		5.96097	5.97642	6.07644	3.92645	3.80632	3.87962	2.36599	2.34804	2.38253	5.83512	5.9446	6.2434	3.74807	3.58912	3.69759	2.09199	2.264	1.91873	5.95253	6.06697	5.9701	3.88109	3.72653	4.26999	2.27312	2.38751	2.53907
sp|Q6ZPJ3|UBE2O_MOUSE	18	AALLEAGMPESTEDK;AQVMPNGALKDSSSLEPMAAAELSDSGR;C[+57.0214635]SMNTEDGAK;EMALLATSLPDGIMVK;GLQEGYENSR;IESWLETHAMQER;IFSSVQWLSGVKPVLSTK;IGNTEDGALPKEDEPSVGQVAR;IMSC[+57.0214635]TPDTQC[+57.0214635]PR;LLFSHDLVSGR;MDLFSALIK;MEAVPDTER;NMTVEQLLTGSPTSPTVEPEKPTR;SGYPDIGFPLFPLSK;TLDNVAIAEEEK;TLDNVAIAEEEKMEAVPDTER;VEVVWADNSK;VQSC[+57.0214635]PDPAVYGVVQSGDHVGR		3.45136	3.50302	3.58461	3.33859	3.31949	3.29917	2.86461	2.95591	2.92324	3.54304	3.65257	3.7326	3.41682	3.28579	3.37124	3.08871	3.26164	3.07351	3.51111	3.73316	3.6872	3.2669	3.53347	3.59009	2.86896	3.05878	3.00582
sp|P63017|HSP7C_MOUSE	28	ATVEDEKLQGK;DAGTIAGLNVLR;DAGTIAGLNVLRIINEPTAAAIAYGLDK;EEFEHQQK;ELEKVC[+57.0214635]NPIITK;FDDAVVQSDMK;FEELNADLFRGTLDPVEK;GPAVGIDLGTTYSC[+57.0214635]VGVFQHGK;HWPFMVVNDAGRPK;LDKSQIHDIVLVGGSTR;LIGDAAKNQVAMNPTNTVFDAK;MKEIAEAYLGK;MVNHFIAEFK;MVNHFIAEFKR;MVQEAEKYK;NQTAEKEEFEHQQK;NQVAMNPTNTVFDAK;NQVAMNPTNTVFDAKR;NSLESYAFNMK;QATKDAGTIAGLNVLR;RFDDAVVQSDMK;SFYPEEVSSMVLTK;SINPDEAVAYGAAVQAAILSGDK;SQIHDIVLVGGST…		10.8809	10.8259	10.941	9.83601	9.74373	9.85118	9.54359	9.54563	9.33511	10.8378	10.8426	11.1012	9.84795	9.75925	9.75129	9.67592	9.94878	9.57016	10.8867	11.0198	10.9914	9.75536	9.95393	10.0658	9.32275	9.50846	9.56216
sp|Q9JHI5|IVD_MOUSE	6	AQEIDQTNDFK;ASGAVGLSYGAHSNLC[+57.0214635]VNQIVR;FWITNGPDADILVVYAK;GSNTC[+57.0214635]ELVFEDC[+57.0214635]K;GSNTC[+57.0214635]ELVFEDC[+57.0214635]KVPAANVLSQESK;GVYVLMSGLDLER		0.233027	0.190511	0.144575	1.05675	1.04207	1.04769	1.19737	1.00891	1.04229	0.528266	0.753119	0.367013	1.42723	0.962635	0.801755	1.26237	1.26402	1.26614	0.604249	0.512257	0.676606	1.25611	1.24584	0.821991	1.10115	1.20477	1.10289
sp|O70475|UGDH_MOUSE	23	ALC[+57.0214635]AVYEHWVPK;ASVGFGGSC[+57.0214635]FQK;DPYEAC[+57.0214635]DGAHALVIC[+57.0214635]TEWDMFK;EADLVFISVNTPTK;EQIVVDLSHPGVSADDQVSR;ESSSIYISK;FSLQDPPNKKPK;IAILGFAFK;IC[+57.0214635]C[+57.0214635]IGAGYVGGPTC[+57.0214635]SVIAHMC[+57.0214635]PEIR;IIDSLFNTVTDK;IIDSLFNTVTDKK;ILTTNTWSSELSK;INAWNSPTLPIYEPGLK;IPYTPGEIPK;IVQNSNGYK;LAANAFLAQR;MLKPAFIFDGR;NLFFSTNIDDAIR;VLDGLHSELQTIGFQIETIGK;VLIGGDETPEGQ…		3.60256	3.67555	3.94025	4.86994	4.78099	4.76654	6.2322	6.40072	6.24513	3.5314	3.63786	3.70241	5.04723	4.87099	4.96806	6.76045	7.12441	6.94678	3.19018	3.35364	3.22795	4.64064	4.75968	4.69905	6.64212	6.38048	6.22018
sp|Q9D7N9|APMAP_MOUSE	5	ANPGFSMLDFLSDKPFIK;EPPFMFGVLHPNTK;LENGEIETIAR;LLLSSETPIEGK;MFSQETVMK		0.0591449	0.0916747	0.321667	1.32509	1.3424	1.48177	2.11956	2.30738	2.24328	0.212406	0.597591	0.487832	1.70381	1.67158	1.82599	2.7685	2.86907	2.8483	0.18117	0.46399	0.448388	1.59755	1.75414	1.94596	2.41556	2.26919	2.27061
sp|Q8C1B7-2|SEP11_MOUSE;sp|Q8C1B7-3|SEP11_MOUSE;sp|Q8C1B7|SEP11_MOUSE	10	AAAQLLQSQAQQSGAQQTK;AAAQLLQSQAQQSGAQQTKK;ELEEEVSNFQK;FESDPATHNEPGVR;LTIVDTVGFGDQINK;NLSLSGHVGFDSLPDQLVNK;SLFNYHDTR;STLMDTLFNTKFESDPATHNEPGVR;STSQGFC[+57.0214635]FNILC[+57.0214635]VGETGIGK;SYELQESNVR		3.71671	3.6436	3.78185	3.83696	3.63905	3.71769	3.37531	3.39925	3.24053	3.8322	3.82354	3.96391	3.62295	3.44957	3.46735	3.29059	3.32913	3.2681	3.98587	3.9734	3.94425	3.65584	3.64949	3.88987	3.29513	3.31065	3.29242
sp|P63242|IF5A1_MOUSE	11	EDLRLPEGDLGK;KYEDIC[+57.0214635]PSTHNMDVPNIK;LPEGDLGKEIEQK;NDFQLIGIQDGYLSLLQDSGEVR;NGFVVLKGRPC[+57.0214635]K;RNDFQLIGIQDGYLSLLQDSGEVR;VHLVGIDIFTGK;VHLVGIDIFTGKK;YDC[+57.0214635]GEEILITVLSAMTEEAAVAIK;YEDIC[+57.0214635]PSTHNMDVPNIK;YEDIC[+57.0214635]PSTHNMDVPNIKR		7.37165	7.16583	7.02109	6.64766	6.17358	6.18671	6.00274	5.73145	5.76023	7.25114	7.17498	7.06084	6.48694	6.20074	5.89081	6.23588	6.03804	6.16126	7.39125	7.26889	7.20376	6.56831	6.23253	5.72005	6.00626	6.0355	5.93014
sp|Q8BFW7|LPP_MOUSE	10	C[+57.0214635]EDC[+57.0214635]GGLLSEGDNQGC[+57.0214635]YPLDGHILC[+57.0214635]K;C[+57.0214635]SVC[+57.0214635]KEPIMPAPGQEETVR;EAAYAPPASGNQNHPGMYPVSGPK;GGYPGPMGPPSIPPSFRPEDELEHLTK;MLYDMENPPADDYFGR;SAQPSPHYMAGPSSGQIYGPGPR;SEGDTAYGQQVQPNTWK;STGEPLGHVPAR;TYITDPVSAPC[+57.0214635]APPLQPK;YYEPYYAAGPSYGGR		-0.12537	-0.182624	-0.0135493	1.71118	1.33181	1.62019	2.34472	2.3969	2.20765	-0.427382	-0.210719	0.179796	1.32401	1.50043	1.65899	2.9407	3.10182	2.76017	-0.240666	0.029145	-0.365896	1.46772	1.45958	2.07599	2.4552	2.2958	2.30395
sp|Q91VD9|NDUS1_MOUSE	23	AVEDKNIGPLVK;AVTEGAQAVEEPSIC[+57.0214635];DDGAAILVAVSNMVQK;DFYMTDSISR;FASEIAGVDDLGTTGR;FEAPLFNAR;GLLTYTSWEDALSR;GNDMQVGTYIEK;GWNILTNSEK;IASQVAALDLGYKPGVEAIR;ILQDIASGR;KPMVVLGSSALQR;LVNQEVLADPLVPPQLTIK;MC[+57.0214635]LVEIEKAPK;MHEDINEEWISDK;MHEDINEEWISDKTR;MLFLLGADGGC[+57.0214635]ITR;SATYVNTEGR;TESIDVMDAVGSNIVVSTR;VALIGSPVDLTYR;VAVTPPGLAR;VVAAC[+57.0214635]AMPVMK;YDHLGDSPK		5.24181	5.3359	5.31753	5.18417	5.19101	5.02905	5.13062	5.2815	5.14324	5.46778	5.53292	5.60975	5.4272	5.24492	5.40167	5.14461	5.4127	5.15776	5.41156	5.56067	5.50502	5.33768	5.45285	5.547	5.04696	5.27879	5.27189
sp|Q9Z110-2|P5CS_MOUSE;sp|Q9Z110|P5CS_MOUSE	26	AEIINHLADLLTDQR;C[+57.0214635]EYPAAC[+57.0214635]NALETLLIHR;EEVEDLC[+57.0214635]R;EMAIPVLEAR;FASYLTFSPSEVK;GDEC[+57.0214635]GLALGR;GIPVMGHSEGIC[+57.0214635]HMYVDSEASVDK;GPVGLEGLLTTK;GQDHVVSDFSEHGSLK;HEILLSQSVR;IIDLIIPR;KVGTFFSEVKPAGPTVEQQGEMAR;LASIVEQVSVLQNQGR;LGSAVVTRGDEC[+57.0214635]GLALGR;LIDIFYPGDQQSVTFGTK;LNSLAIGLR;MLATLEPEQR;NLNGTLHELLR;QALHSGQNHLK;QIAASSQESVGR;TPLFDQIIDMLR;VGTFFSEVKPAGPTVE…		5.15398	5.20791	5.1725	4.88611	4.85234	4.76606	4.78045	4.92158	4.74186	5.27165	5.30763	5.26739	5.27716	5.00197	5.12345	5.16018	5.42901	5.10125	5.18614	5.19696	5.19715	5.12962	5.26139	5.25486	4.8274	4.93664	4.81032
sp|Q9CXW3|CYBP_MOUSE	13	EKPSYDTEADPSEGLMNVLK;EKPSYDTEADPSEGLMNVLKK;ISNYGWDQSDK;ISNYGWDQSDKFVK;IYEDGDDDMK;IYEDGDDDMKR;IYITLTGVHQVPTENVQVHFTER;KPELDNEKPAAVVAPLTTGYTVK;NYSMIVNNLLKPISVESSSK;NYSMIVNNLLKPISVESSSKK;TDTVIILC[+57.0214635]R;TINKAWVESR;WDYLTQVEK		5.86663	5.85043	5.9731	4.19649	4.22667	4.09798	3.943	3.84956	3.86131	5.78982	5.77774	5.98414	4.07348	4.08551	4.39428	3.91044	3.54542	3.92162	5.73381	5.63748	5.75243	4.09773	4.05704	4.26247	3.80446	3.80365	3.8027
sp|Q921F4|HNRLL_MOUSE	19	AALNGADIYAGC[+57.0214635]C[+57.0214635]TLK;C[+57.0214635]KTDAVEALTALNHYQIR;FGTIC[+57.0214635]YVMMMPFK;GLC[+57.0214635]ESVVEADLVEALEK;HDGYGSHGPLLPLPSR;LC[+57.0214635]FSTSSHL;LC[+57.0214635]NDHEVLPFIK;NDNDSWDYTKPYLGR;NGIQAMVEFESVLC[+57.0214635]AQK;QALVEFENIDSAK;QHSVVPSQIFELEDGTSSYK;QHSVVPSQIFELEDGTSSYKDFAMSK;SMPLSTEGGGSHHK;TDAVEALTALNHYQIR;TEEGEIVYSAEESENR;TIPGTALVEMGDEYAVER;TLSGLLEWK;VFNLFC[+57.02…		3.98317	3.98865	4.03426	3.95456	3.95716	3.72065	3.83177	3.70231	3.88209	3.76011	3.68906	3.65953	3.98188	3.75552	3.88551	3.63749	3.46374	3.5693	3.71932	3.82147	3.96257	3.71336	3.97854	3.94822	3.62077	3.70007	3.66942
sp|O88569|ROA2_MOUSE	26	ALSRQEMQEVQSSR;DYFEEYGK;DYFEEYGKIDTIEIITDR;EESGKPGAHVTVK;EESGKPGAHVTVKK;GFGFVTFDDHDPVDK;GFGFVTFDDHDPVDKIVLQK;GFGFVTFSSMAEVDAAMAARPHSIDGR;GGGGNFGPGPGSNFR;GGGGNFGPGPGSNFRGGSDGYGSGR;GGNFGFGDSR;GGNFGFGDSRGGGGNFGPGPGSNFR;IDTIEIITDR;KLFIGGLSFETTEESLR;LFIGGLSFETTEESLR;LFIGGLSFETTEESLRNYYEQWGK;LFVGGIKEDTEEHHLR;LTDC[+57.0214635]VVMRDPASK;NMGGPYGGGNYGPGGSGGSGGYGGR;NYYEQWGK;QEMQEVQSSR;RGFGFVTFDDHDPVDK;SGRGG…		8.56614	8.56579	8.42031	8.24041	8.04572	8.03698	7.91676	8.03193	7.86654	8.51949	8.62604	8.70066	8.21994	8.09044	8.17099	8.06594	8.06645	8.05963	8.76386	8.67388	8.49543	8.28875	8.05557	8.26425	7.81349	8.04331	7.97641
sp|P11276|FINC_MOUSE	51	APITGYIIR;ATGVFTTLQPLR;C[+57.0214635]DPHEATC[+57.0214635]YDDGK;C[+57.0214635]DPIDQC[+57.0214635]QDSETR;DSMIWDC[+57.0214635]TC[+57.0214635]IGAGR;EESPPLIGQQATVSDIPR;ESNPLTAQQTTK;EYLGAIC[+57.0214635]SC[+57.0214635]TC[+57.0214635]FGGQR;FGFC[+57.0214635]PMAAHEEIC[+57.0214635]TTNEGVMYR;FLTTTPNSLLVSWQAPR;FTNIGPDTMR;GDSPASSKPVSINYK;GEWAC[+57.0214635]IPYSQLR;GEWTC[+57.0214635]KPIAEK;GFNC[+57.0214635]ESKPE…		3.26866	3.18998	3.25962	5.49329	5.28302	5.13678	6.69651	6.69124	6.52998	2.63965	2.5958	2.6687	5.29977	5.18393	5.32455	6.04483	6.04324	5.82881	2.61809	2.71185	2.67382	4.96508	5.36424	5.59693	6.31703	6.79168	6.67461
sp|Q8VEM8|MPCP_MOUSE	13	ALYSNILGEENTYLWR;EEGLNAFYK;GIFNGFSITLK;GIFNGFSITLKEDGVR;GSTASQVLQR;GWAPTLIGYSMQGLC[+57.0214635]K;IQTQPGYANTLR;IQTQPGYANTLREAVPK;LPRPPPPEMPESLK;LPRPPPPEMPESLKK;MQVDPQKYK;MYKEEGLNAFYK;YYALC[+57.0214635]GFGGVLSC[+57.0214635]GLTHTAVVPLDLVK		6.92877	6.98141	7.14405	6.96267	7.09954	7.01732	7.21564	7.087	7.22213	6.97579	6.91375	7.07124	7.21923	6.97401	7.03423	7.35008	7.58728	7.54385	6.97769	7.04365	7.12443	7.06966	7.28495	7.14555	7.28011	7.10724	7.16223
sp|O89050|MKLN1_MOUSE	5	ATIDPELNEIHVLSGLSK;AVNDGLFNQYISQQEYKPR;SGSDFTALGFSDVDHTYAQR;SLQEEEPC[+57.0214635]PR;WSSFSSTYLPENILVDKPNDQSSR		-2.46545	-2.59605	-2.37577	-3.42343	-2.89369	-2.91719	-3.27162	-3.66785	-3.58233	-2.25249	-2.56807	-3.05541	-2.76908	-3.20366	-3.17416	-3.15319	-3.30599	-3.29138	-2.51448	-2.27599	-2.54925	-3.08494	-2.78423	-2.79188	-3.65441	-3.50143	-4.00158
sp|Q8VDM4|PSMD2_MOUSE	32	AELATEEFLPVTPILEGFVILR;AVPLALALISVSNPR;C[+57.0214635]FAADIISVLAMTMSGER;C[+57.0214635]FAADIISVLAMTMSGEREC[+57.0214635]LK;DIDENAYAK;DKEQELSEEDK;DPNNLFMVR;DTSLYRPALEELRR;EDVLTLLLPVMGDSK;EIYENMAPGENK;EWQELDDAEK;FGGSGSQVDSAR;GTLTLC[+57.0214635]PYHSDR;HLAGEVAKEWQELDDAEK;LAQGLTHLGK;LGSIFGLGLAYAGSNR;LKEIYENMAPGENK;LLTDDGNKWLYK;LNILDTLSK;LVGSQEELASWGHEYVR;MLVTFDEELRPLPVSVR;MNLASSFVNGFVNAAFGQDK;NEC[+57.021…		6.55055	6.61443	6.67365	6.31311	6.37477	6.27385	6.10065	6.12065	6.12399	6.58212	6.58334	6.63903	6.45154	6.22599	6.15566	6.20538	6.34573	6.2309	6.5123	6.53461	6.55837	6.28255	6.43432	6.07483	5.99831	6.13283	6.08763
sp|D3Z7P3-2|GLSK_MOUSE	7	DSPGETDAFGNSEGK;FDYVMQFLNK;FSPDLWGVSVC[+57.0214635]TVDGQR;FVIPDFMSFTSHIDELYESAK;LTLQTTSDGVMLDKDLFK;QGVNNAEKFDYVMQFLNK;VSPESSDDTSTTVVYR		1.61502	1.38336	1.67607	1.27886	0.977555	0.982096	1.3769	1.25788	1.0948	1.37854	1.40004	1.27675	1.174	1.11453	0.719165	1.89	1.60398	2.03316	1.09452	1.03262	1.03425	0.951813	0.839527	0.326077	1.47203	1.34073	1.03193
sp|Q9QZE5|COPG1_MOUSE	26	ALC[+57.0214635]QITDSTMLQAVER;ALNAGYILNGLTVSIPGLEK;ALQQYTLEPSEKPFDLK;ATFYLNVLEQK;C[+57.0214635]VMDDDNEVR;DMTGKEDNYR;ELAPAVSVLQLFC[+57.0214635]SSPK;EMSC[+57.0214635]IAEDVIIVTSSLTK;FGAQNEEMLPSILVLLK;FGAQNEEMLPSILVLLKR;FLGMHPC[+57.0214635]ER;HPSAVTAC[+57.0214635]NLDLENLVTDSNR;ILYLINQGEHLGTTEATEAFFAMTK;LFQSNDPTLR;NTHTLLLAGVFR;QAIVDKVPSVSSSALVSSLHLLK;QEIFQEQLAAVPEFQGLGPLFK;QISSFMSEISDEFK;QLEEEDGSR;SPF…		4.39223	4.42359	4.53229	4.94517	4.9789	4.87257	5.19949	5.25051	5.32128	4.27701	4.32832	4.41062	5.10917	5.02306	5.11336	5.95697	6.23336	6.06212	4.17302	4.32836	4.28351	4.80845	4.97247	4.93528	5.14869	5.12202	5.06541
sp|Q9JKR6|HYOU1_MOUSE	27	AANSLEAFIFETQDK;AEPPLNASAGDQEEK;AHFNLDESGVLSLDR;DAVITVPAFFNQAER;DAVIYPILVEFTR;EAGMQPQLQIR;EVEEEPGLR;FLGDSAAGMAIK;FLGDSAAGMAIKNPK;LIPEMDQVFTEVEMTTLEK;LPATEKPVLLSK;LSATSTWLEDEGFGATTVMLK;LYQPEYQEVSTEEQR;LYQPEYQEVSTEEQREEISGK;MMALDREVQYLLNK;NINADEAAAMGAVYQAAALSK;QADNPHVALYR;SLAEDFAEQPIK;TLGGLEMELR;TPVTVTLKENER;TVLSANADHMAQIEGLMDDVDFK;TVLSANADHMAQIEGLMDDVDFKAK;VAIVKPGVPMEIVLNK;VEFEELC[+57.0214635]ADLF…		5.35133	5.45917	5.51345	5.96502	5.8877	5.82568	5.82205	5.94653	5.96305	5.36058	5.55293	5.75967	6.01783	5.97712	6.08119	6.62897	6.89392	6.8053	5.44676	5.54602	5.52658	5.98989	5.94123	6.1443	5.94703	5.98882	5.93452
sp|O08579|EMD_MOUSE	9	DDIFSSLEEEGKDR;DYNDDYYEESYLTTK;IFEYETQR;KEDALLYQSK;LIYGQDSAYQSIAHYRPISNVSR;QAPAAALGQDR;QPGTSLVDADTFHHQVR;QYNIPHGPIVGSTR;TYGEPESVGMSK		3.48188	3.30827	3.49258	3.59791	3.36793	3.51776	3.1793	3.20177	3.04876	3.34679	3.4873	3.67893	3.38573	3.21714	3.42369	3.14279	3.27928	3.09742	3.40145	3.56575	3.35267	3.37031	3.3454	3.63393	2.88481	3.12091	3.12206
sp|Q9JI39|ABCBA_MOUSE	4	ATQDSLAEATQLAEER;ILLLDEATSALDAENEHLVQEALDR;LYDPNSGTVSLDGHDIR;NANFVAVLDHGK		-1.99723	-2.28755	-1.49778	-2.23859	-2.1396	-2.13675	-1.92723	-2.17449	-2.34203	-1.63338	-2.14765	-1.33744	-2.20646	-2.3406	-2.50956	-1.79529	-1.44947	-1.58338	-1.52643	-1.50716	-1.65343	-2.12699	-2.06582	-1.92666	-1.8299	-1.69066	-1.78506
sp|O55091|IMPCT_MOUSE	4	ISEETQPETEELPPVAHGVPITDRR;NFTNTPDESTK;QTFLQDC[+57.0214635]EDDGETAAGGR;STFQAHVAPVVC[+57.0214635]PEQVK		-0.486904	-0.736132	-0.603152	-0.420644	-0.584738	-0.425184	-0.0127891	-0.0778612	-0.0806856	-0.852391	-0.91644	-1.01114	-0.814215	-0.776068	-0.314498	0.0478461	-0.46787	-0.0365255	-0.825564	-1.29388	-1.19626	-0.542009	-1.06399	-0.501106	-0.127455	-0.384581	-0.649154
sp|P23591|FCL_MOUSE	10	DADLTDAAQTQALFQK;ETC[+57.0214635]TWFTDNYEQAR;ILVTGGSGLVGR;LFIWVLR;NVHINDNVLHSAFEVGAR;SSDSALTVWGTGKPR;TTYPIDETMIHNGPPHSSNFGYSYAK;VQPTHVIHLAAMVGGLFR;VVADGAGLPGEEWVFVSSK;YNLDFWR		3.4644	3.55255	3.49077	3.7179	3.54003	3.78086	3.65922	3.73542	3.60548	3.39648	3.51996	3.45053	3.86424	3.465	3.40572	3.78775	4.17482	3.95326	3.41068	3.35613	3.29757	3.65378	3.59433	3.48107	3.52421	3.78678	3.88433
sp|P19001|K1C19_MOUSE	16	AALEGTLAETEAR;ALEQANGELEVK;DAEATYLAR;FVTSSSGSYGGVR;GGSFSGTLAVSDGLLSGNEK;IEELNTQVAVHSEQIQISK;ILGATIDNSK;ITMQNLNDR;LSVEADINGLR;NHEEEITALR;QTSAMSSFGGTGGGSVR;SLLEGQEAHYNNLPTPK;SQYEIMAEK;SRLEQEIATYR;TDLEMQIESLKEELAYLK;TKFETEHALR		0.656476	0.7807	0.658836	2.8787	2.44533	2.52997	5.05836	5.49066	5.09673	0.282716	-0.0272889	0.334832	2.13401	2.08294	2.37649	5.21823	5.38633	5.00764	0.42372	0.346105	1.10408	2.42972	2.68341	2.69918	5.08943	5.12839	5.14645
sp|P46935|NEDD4_MOUSE	30	ANILEDSYR;ANILEDSYRR;AVWMMDSEK;DDFLGQVDVPLYPLPTENPR;DILGASDPYVR;EGFFELIPQDLIK;ESPENWEIVR;EWFFLISK;FIIDEELFGQTHQHELK;ILFEVFDENR;LAVC[+57.0214635]GNPATSQPVTSSNHSSR;LDLPPYESFDELWDK;LITLHDMESVDSEYYSSLR;LQNVAITGPAVPYSR;LTRDDFLGQVDVPLYPLPTENPR;LWIEFDGEK;NGYSMNHQVIHWFWK;QISEDVDGPDNR;QTDIPNKFEMK;RANILEDSYR;RPSPDDDLTDEDNDDMQLQAQR;SYYVDHNSK;TGGSEIVVTNK;TTTWSKPTMQDDPR;TYYVNHESR;VAGMAVYHGK;VFFINHNIK;VTLYDPMS…		7.52579	7.55832	7.6184	6.57986	6.4328	6.45211	6.19477	6.30134	6.16562	7.56904	7.62028	7.76825	6.4365	6.22048	6.06499	6.17639	6.31464	6.26343	7.73839	7.78564	7.72059	6.43834	6.31994	6.31399	6.08076	6.32437	6.40482
sp|P57776-3|EF1D_MOUSE;sp|P57776|EF1D_MOUSE	2	QENGASVILR;SLAGSSGPGASSGPGGDHSELIVR		3.00674	2.80592	2.98141	1.8545	1.45244	1.81548	1.1863	1.4771	1.3714	2.85845	3.29564	3.53829	1.452	1.77597	2.21506	1.53571	1.62454	1.63674	3.36024	3.28496	3.28237	2.30751	1.68721	2.27624	1.72755	1.51641	1.4708
sp|Q8BMZ5|SEN34_MOUSE	3	FGGDFLVYPGDPLR;LGLPLLLLPEEAR;QQEQSFQDQNTLAAEAR		1.23359	1.33582	1.54648	0.885386	1.21314	1.12671	0.662942	0.738208	0.84479	1.25152	1.20977	1.72022	1.04323	0.986249	0.869031	0.690161	1.02941	0.776442	1.21777	1.27633	1.38146	0.913184	1.03776	0.901081	0.484791	0.624351	1.15238
sp|P47856-2|GFPT1_MOUSE;sp|P47856|GFPT1_MOUSE	17	AVEYYFASDASAVIEHTNR;AVQTLQMELQQIMK;C[+57.0214635]QNALQQVVAR;EIFEQPESVVNTMR;EVLSMDDEIQK;GYDFESETDTETIAK;GYDSAGVGLDGGNDKDWEANAC[+57.0214635]K;LILIAC[+57.0214635]GTSYHAGVATR;LMPVIMIIMR;NNEFIVIHNGIITNYK;QGRPVVIC[+57.0214635]DKEDTETIK;SDKNNEFIVIHNGIITNYK;VDSTTC[+57.0214635]LFPVEEK;VIFLEDDDVAAVVDGR;VNFDDYTVNLGGLK;VNFDDYTVNLGGLKDHIK;WATHGEPNPVNSHPQR		1.70367	1.5158	1.57327	3.2397	3.10255	3.06829	3.50291	3.46894	3.49453	1.81559	1.84114	1.87596	3.60896	3.28065	3.43059	4.25841	4.27112	4.34967	1.73981	1.97607	1.87308	3.23481	3.15896	3.18961	3.66315	3.52938	3.49665
sp|Q80V26|IMPA3_MOUSE	4	EMLAVAVLAAER;EVPAESVTVWIDPLDATQEYTEDLRK;MTSGDVLSNR;VLALLDVPDMTQEK		0.0608303	0.160667	0.209894	1.40072	1.3791	1.41086	1.84707	1.98666	1.90281	0.196161	0.182133	0.433273	1.70588	1.41531	1.47219	2.06895	2.11447	2.35114	0.0351811	0.208288	0.203942	1.48483	1.38371	1.46446	1.73702	1.91631	1.90066
sp|Q1HFZ0|NSUN2_MOUSE	26	DGQWFADWHEVPQGR;EDPFVFIPEDDPLFPPIEK;FHQFLVSETESGNISR;FQQPPQPEGEEDASDGGR;GAEQLAEGGR;GQAGWEGGYPEIVK;IITVSMEDVK;IITVSMEDVKTLLTQENPFFR;ILC[+57.0214635]DVPC[+57.0214635]SGDGTMR;ILC[+57.0214635]DVPC[+57.0214635]SGDGTMRK;IVPEGEWDQFMESLR;KLSSEAYSQVK;LAQEGIYTLYPFINSR;LFEHYYQELK;LSSEAYSQVK;LSSPC[+57.0214635]IMVVNHDASSIPR;MMGLEVLGEK;NNSGEEFDC[+57.0214635]AFR;NVLLNNSEK;RFQQPPQPEGEEDASDGGR;SEGALELADVSAELPGLK;…		6.27365	6.28568	6.32327	5.00544	4.9833	4.94	4.51808	4.49397	4.51588	6.27356	6.29064	6.40928	5.13292	5.01057	5.13382	5.20837	5.36154	5.20031	6.27849	6.32758	6.3805	5.12525	5.1084	5.2489	4.72159	4.6687	4.49077
sp|Q8R016|BLMH_MOUSE	22	ATVQGAQHVFQHVVPQEGKPVTNQK;C[+57.0214635]WIFSC[+57.0214635]LNVMR;C[+57.0214635]YFFLNAFVDTAQK;DGEAVWFGC[+57.0214635]DVGK;DNQEGTFVK;EHVKPLFNMEDK;GEISSTQDAMMEEIFR;GYLC[+57.0214635]MTDEWFSEYVYEVVVDKK;IC[+57.0214635]FVNDPRPQHK;IGPITPLQFYK;KTLYNNQPIDFLK;LAFGESLMTHAMTFTAVSEK;LGLSDMNVYDHELVFGVSLK;LNSDPQFVLAQNVGTTHDLLDIC[+57.0214635]LR;LVQYLLMNPTNDGGQWDMLVNIVEK;LYTVDYLSNMVGGR;LYTVDYLSNMVGGRK;MVAASIKDGEAVWF…		4.73473	4.7656	4.83728	5.64529	5.62033	5.45659	5.80581	5.8217	5.78502	4.7743	4.6335	4.77301	5.43589	5.27436	5.37994	5.26277	4.98292	5.15111	4.69868	4.65313	4.80988	5.58035	5.64796	5.71863	5.49187	5.77436	5.95999
sp|P42225|STAT1_MOUSE	5	EAPEPMELDDPKR;FNQAQEGNIQNTVMLDK;FSLENNFLLQHNIR;TELISVSEVHPSR;YLYPNIDKDHAFGK		-3.50284	-3.59097	-3.04655	-3.30733	-3.40809	-3.63942	-2.97151	-2.98131	-3.02287	-3.91134	-3.70526	-3.36412	-2.98975	-3.0861	-3.18109	-3.39106	-3.65827	-3.86549	-3.31562	-3.03318	-3.47677	-2.69433	-3.79353	-3.15429	-3.05271	-3.12398	-2.91599
sp|Q9D0G0|RT30_MOUSE	5	TLVNLLAPLNPVLSTAALDC[+57.0214635]K;TLVNLLAPLNPVLSTAALDC[+57.0214635]KR;WQATVHAAPSVDEK;YQINDKPHNQIR;YVVHPQISALNADR		-2.60138	-2.0271	-1.81032	-3.07385	-2.65176	-3.11184	-4.76367	-3.51316	-3.01637	-2.58582	-2.25952	-3.12427	-3.43053	-2.62375	-2.38772	-4.36411	-5.10231	-3.72778	-2.90547	-2.62642	-1.89866	-3.80926	-2.87512	-2.42239	-3.81961	-3.43932	-3.42564
sp|O08997|ATOX1_MOUSE	3	LGGVEFNIDLPNK;LGGVEFNIDLPNKK;VC[+57.0214635]IDSEHSSDTLLATLNK		2.64449	2.77013	2.4362	2.52233	2.06003	1.93712	2.27247	2.25319	2.23424	2.40778	2.43069	2.46209	2.72618	2.47643	2.43266	3.05331	3.06971	2.67981	2.89199	2.64846	2.73209	2.30446	1.94652	2.22626	2.23166	2.36007	2.25748
sp|Q9R0E1|PLOD3_MOUSE	17	EVFSSSDTDPDMAFC[+57.0214635]K;FLNSGGFIGFAPTIHQIVR;GIFLHLSNQHEFGR;GVDYEGGGC[+57.0214635]R;IFQNLNGALDEVILK;KVIAPMLSR;LAGGYENVPTVDIHMK;LLVITVATAETEGYR;LTHYHEGLPTTR;NVAYDTLPVVVHGNGPTK;QVGYEDQWLQLLR;SEDYVELVQR;TELPQKEVFSSSDTDPDMAFC[+57.0214635]K;TLGLGQEWR;TYVGPMTEYLFPGYHTK;VGVWNVPYISQAYVIR;VLLAVFVEQPTPFLPR		1.67525	1.83156	1.82148	2.80084	2.84074	2.79197	3.93587	3.77123	3.9292	1.83579	1.63069	1.67024	3.45917	3.14971	3.17445	5.2188	5.49448	5.23959	1.39664	1.56396	1.68582	2.6582	2.78383	2.36259	3.87839	3.69913	3.5575
sp|Q9DC16|ERGI1_MOUSE	8	FEGQFSINK;HEVGHIDNSMK;IIPAIWFR;IVPTVYEDK;LSFGDTLQVQNVHGAFNALGGADR;LTSNPLASHDYILK;YDLSPITVK;YSYQYTVANK		2.74926	2.69545	2.85586	2.90696	2.75773	2.71977	3.11527	3.20336	3.10012	2.63194	2.64832	2.77922	2.72965	2.51973	2.56093	2.76406	3.10096	2.77062	2.5801	2.66666	2.72826	2.87797	2.96468	3.04817	3.21864	3.22711	3.2018
sp|P60824|CIRBP_MOUSE	4	DSYDSYATHNE;GFGFVTFENIDDAK;GFGFVTFENIDDAKDAMMAMNGK;YGQISEVVVVK		0.817943	0.444115	0.0472077	2.66591	2.4099	2.25066	2.74961	2.81618	2.67222	0.788113	0.746539	0.960693	2.64709	2.55376	2.23013	2.44613	2.12757	2.59587	0.505305	0.996054	0.443905	2.60318	2.19306	2.38358	2.43326	2.81093	2.89496
sp|P56183-2|RRP1_MOUSE;sp|P56183-3|RRP1_MOUSE;sp|P56183|RRP1_MOUSE	6	AFWQTMIR;ATGGFTPDELLK;EAGSEAESSSADPGPGR;GLFYC[+57.0214635]MWMQDKPLQQEELGR;TIAQLVHAFHTTEAQHQFLK;VGAAELTADQNLQFIDPFC[+57.0214635]QIAAR		2.61676	2.87912	2.84329	1.29408	2.23274	1.5622	1.2231	1.39702	1.49602	2.67703	2.69558	2.56975	1.88271	1.81346	2.02265	0.900389	1.11161	0.913837	2.59804	2.54854	2.6329	1.31089	2.06258	1.81457	0.69645	1.20079	1.18755
sp|P62814|VATB2_MOUSE	14	AVVGEEALTSDDLLYLEFLQKFEK;AVVQVFEGTSGIDAK;GFPGYMYTDLATIYER;HVLVILTDMSSYAEALR;IPIFSAAGLPHNEIAAQIC[+57.0214635]R;IPQSTLSEFYPR;IYPEEMIQTGISAIDGMNSIAR;NFITQGPYENR;QIYPPINVLPSLSR;SAIGEGMTRK;SGQVLEVSGSK;TSC[+57.0214635]EFTGDILR;TVYETLDIGWQLLR;YAEIVHLTLPDGTK		4.73284	4.76795	4.84799	4.9331	5.09006	4.98985	5.3167	5.35993	5.36375	4.68649	4.63833	4.7548	5.21879	5.23278	5.29453	5.57985	5.81498	5.69085	4.60247	4.84176	4.82168	4.89809	5.27011	5.25321	5.27157	5.31075	5.30809
sp|Q6P9P6|KIF11_MOUSE	22	AIDEHNAEAQESFGK;ANAHSVVEC[+57.0214635]DHAR;ATELFMDSKNELDQC[+57.0214635]K;C[+57.0214635]GTLNTSTVHFSDQWASC[+57.0214635]LSK;EAGNINQSLLTLGR;EEYVSSALER;EIDSFLSILC[+57.0214635]NNLHELR;ENTVSSLVESQK;ETSQDMDEER;GLEEITVHNKDEVYQILEK;ILAESDGLLQELR;KANAHSVVEC[+57.0214635]DHAR;LTDNGTEFSVK;NGVYISEESFR;NIMNKPEVNQK;NLNSLFNNMEELIK;SPNEVYTWEEDPLAGIIPR;TIVAPSVVSILNINK;TSIIATISPASFNLEETLSTLEYAHR;TTAATLMNAYSSR;VTVQEEQ…		3.75075	3.8189	3.79116	2.40999	2.51948	2.39344	1.14616	1.03618	1.22429	3.78825	3.82158	4.03452	2.43723	2.35412	2.36155	1.67206	1.89199	1.63876	3.80839	3.92065	3.89222	2.32903	2.50748	2.60397	1.36426	1.46932	1.41879
sp|Q61990-3|PCBP2_MOUSE;sp|Q61990|PCBP2_MOUSE	7	AITIAGIPQSIIEC[+57.0214635]VK;GVTIPYRPKPSSSPVIFAGGQDR;IANPVEGSTDR;IITLAGPTNAIFK;LEEDISSSMTNSTAASRPPVTLR;LVVPASQC[+57.0214635]GSLIGKGGC[+57.0214635]K;QVTITGSAASISLAQYLINVR		6.40378	6.55289	6.65128	5.68966	6.03071	5.87155	5.30657	5.35088	5.45621	6.41602	6.36743	6.57153	5.68161	5.63104	5.81908	5.25406	5.44461	5.15673	6.39594	6.43833	6.58789	5.5333	5.93542	5.94371	5.11896	5.32523	5.34653
sp|Q7TMK9-2|HNRPQ_MOUSE	23	AIEALKEFNEDGALAVLQQFK;DLEGENIEIVFAKPPDQK;DLFEDELVPLFEK;DSDLSHVQNK;DYAFIHFDER;EAAQEAVKLYNNHEIR;EFNEDGALAVLQQFK;EQILEEFSK;GFC[+57.0214635]FLEYEDHK;GFC[+57.0214635]FLEYEDHKTAAQAR;GYAFVTFC[+57.0214635]TK;LDEIYVAGLVAHSDLDER;LKDYAFIHFDER;LMMDPLTGLNR;LYNNHEIR;NLANTVTEEILEK;SAFLC[+57.0214635]GVMK;TGYTLDVTTGQR;TGYTLDVTTGQRK;VADSSKGPDEAK;VAEKLDEIYVAGLVAHSDLDER;VTEGLTDVILYHQPDDK;VWGNVGTVEWADPIEDPDPEVMAK		6.62855	6.76897	6.7279	6.05378	6.10126	5.92528	5.93279	5.94451	5.9521	6.69578	6.69993	6.78289	6.08838	5.99557	6.08619	6.14164	6.18759	6.07483	6.74	6.69883	6.79623	6.03983	6.0457	6.21289	5.8363	5.86411	5.91578
sp|Q61081|CDC37_MOUSE	13	AMKEYEEEER;C[+57.0214635]ALMEQVAHQTMVMQFILELAK;DVQMLQDAISK;EGEEAGPGDPLLEAVPK;ELEVAESDGQVELER;LGPGGLDPVEVYESLPEELQK;LKELEVAESDGQVELER;NMPWNVDTLSK;NMPWNVDTLSKDGFSK;SGEAKEGEEAGPGDPLLEAVPK;SMVNTKPEKAEEDSEEAR;SWEQKLEDMR;TADHQYMEGFK		3.66363	3.64037	3.45979	3.18436	3.29869	3.31361	2.95206	3.4216	3.19875	3.6562	4.08336	4.14225	2.88606	3.17586	3.54761	3.05925	3.29679	3.16395	4.13522	3.89845	3.84378	3.47953	2.96813	3.62667	3.13459	3.10109	3.14463
sp|Q8VE80|THOC3_MOUSE	5	GHGDSVDQLC[+57.0214635]WHPSNPDLFVTASGDK;LWEVQC[+57.0214635]ESPTFTVAWHPK;MLASASEDHFIDIAEVETGDK;TASVFLLEKDR;YVLGMQELFR		0.274933	0.195534	0.292806	-0.225851	-0.21173	-0.259147	-0.0337715	-0.0066869	-0.205045	0.177108	0.130497	0.518777	0.0336138	-0.163223	-0.430359	-0.0507802	0.351026	0.279208	0.234411	0.194557	0.308322	0.203115	-0.161584	-0.655243	-0.174037	-0.126083	-0.0625441
sp|Q6P5F9|XPO1_MOUSE	38	AIIASNIMYIVGQYPR;C[+57.0214635]LSENISAAIQANGEMVTK;DFEEYPEHR;DLLGLC[+57.0214635]EQKR;DTDSINLYK;EFAGEDTSDLFLEER;EFAGEDTSDLFLEERETALR;EFMKDTDSINLYK;ESPFSTSASPLLSGSQHFDIPPR;ETLVYLTHLDYVDTEIIMTK;FLNVPMFR;FLNWIPLGYIFETK;IC[+57.0214635]LEYWNHLAAELYR;ISTPLNPGNPVNNQMFIQDYVANLLK;IYLDMLNVYK;LDINLLDNVVNC[+57.0214635]LYHGEGAQQR;LFEFMHETHDGVQDMAC[+57.0214635]DTFIK;LFVTGLFSLNQDIPAFK;LISTLIYK;LLSEEVFDFSSGQITQVK;…		6.55214	6.67828	6.6057	5.96143	6.11886	6.24427	5.80227	5.89923	5.93405	6.70366	6.6472	6.6765	5.95046	5.82667	5.80024	5.7901	5.71191	5.92211	6.65169	6.60963	6.58762	6.08268	5.85677	5.76237	5.7992	5.8023	5.8486
sp|P08113|ENPL_MOUSE	41	AQAYQTGKDISTNYYASQK;DISTNYYASQK;DISTNYYASQKK;EAESSPFVER;EATEKEFEPLLNWMK;EEASDYLELDTIK;EEASDYLELDTIKNLVR;EEEAIQLDGLNASQIR;EESDDEAAVEEEEEEK;EESDDEAAVEEEEEEKKPK;EFEPLLNWMK;EFEPLLNWMKDK;EGVKFDESEK;ESDDPMAYIHFTAEGEVTFK;ETLQQHKLLK;EVEEDEYK;EVEEDEYKAFYK;FAFQAEVNR;FDESEKTK;FQSSHHSTDITSLDQYVER;GVVDSDDLPLNVSR;IADEKYNDTFWK;IYFMAGSSR;KEAESSPFVER;KYSQFINFPIYVWSSK;LGVIEDHSNR;LISLTDENALAGNEELTVK;LTESPC[+57.0214…		8.27835	8.30845	8.30172	8.52856	8.48494	8.45865	8.53284	8.51282	8.51617	8.26724	8.3522	8.5007	8.72284	8.5146	8.61909	9.27667	9.49802	9.31755	8.30251	8.36214	8.32207	8.51069	8.55614	8.56426	8.60797	8.52637	8.45936
sp|Q8CCN5|BCAS3_MOUSE	8	EGSIETLSNSSGSTSGSIPR;FENADLNDTSR;GGAC[+57.0214635]GDNIQSYTATVLSAAK;LSPLPSLMVVTPLAQIK;LWMGPQFHFK;SAGLEEIEQELTSK;TPIYDLHC[+57.0214635]NKR;VVTQLTGTLPSGVTEDDVALHC[+57.0214635]NSR		-0.106676	-0.0781751	0.193193	-0.474042	-0.445794	-0.282248	-0.160435	-0.224604	-0.204069	-0.0452691	-0.144646	0.0556948	-0.398673	-0.260903	-0.395027	-0.132637	0.102781	-0.0209614	0.015299	0.382769	0.353615	-0.475897	-0.174017	0.260067	-0.31769	-0.345194	-0.179404
sp|Q9QY36|NAA10_MOUSE	4	AMIENFNAK;DLTQMADELRR;GLAAEDSGGDSK;GNVLLSSGEAC[+57.0214635]R		2.01649	1.83318	1.9139	0.315235	0.537172	0.682643	0.371012	0.578394	0.27249	1.82323	2.00278	2.20407	0.418022	0.518435	0.751609	0.428826	0.071928	0.33119	2.15181	2.18041	2.20044	0.840979	0.558309	1.02672	0.608934	0.43063	0.612837
sp|Q9DB90|SMG9_MOUSE	2	GGNQTSGIDFFITQER;IVFLDTQPILSPSILDHLINNDR		-2.09634	-1.94958	-2.16169	-2.43626	-2.37919	-2.468	-2.76893	-3.23286	-3.0908	-2.00874	-2.07632	-2.43214	-2.51886	-2.66209	-4.55219	-2.43164	-2.42481	-2.38376	-2.12989	-3.03038	-2.84343	-2.69676	-2.84134	-7.3764	-3.24506	-2.68094	-2.59178
sp|P05784|K1C18_MOUSE	25	AQIFANSVDNAR;AQMEQLNGVLLHLESELAQTR;AQYEALAQK;DAETTLTELR;DAETTLTELRR;EELDKYWSQQIEESTTVVTTK;ETMQDLNDR;IIEDLRAQIFANSVDNAR;KVVDDTNITR;LEAEIATYR;LQLETEIEALKEELLFMK;NQNINLENSLGDVEAR;QAQEYEALLNIK;QSVESDIHGLR;QSVESDIHGLRK;STTFSTNYR;TLQTLEIDLDSMK;VKLEAEIATYR;VKYETELAMR;VRPASSAASVYAGAGGSGSR;VVDDTNITR;VVSETNDTR;YETELAMR;YKAQMEQLNGVLLHLESELAQTR;YWSQQIEESTTVVTTK		2.54911	2.40306	2.59992	6.46192	6.09108	6.17454	6.60366	6.8978	6.66236	0.879971	0.898403	0.499003	6.32066	6.19932	6.34892	6.81035	6.91397	6.73616	0.797848	1.0328	1.15878	6.77066	6.77014	6.79165	7.10405	6.9335	6.70534
sp|Q8K2Z4-2|CND1_MOUSE;sp|Q8K2Z4|CND1_MOUSE	29	AIIDEFEQKLR;ATLGFDWEEER;DKQTESLVEK;DLAYC[+57.0214635]MSQLPLTER;DQFLDILQAHGHDVNSFVR;EAIAHLLGVALVR;EAVLNAYR;ELLDGNQVLAAFVPLLLK;FC[+57.0214635]MISAPFC[+57.0214635]DSQLR;FPNLVDPWTPHLYAR;GFAAFLTELAER;GFAHPDPLWIPFK;GMDGIEEFETGQGGSQR;GNAIYNLLPDIISR;GQVSEMAVLLIDPVPQIAALAK;HSQELSSILDDAALSGSDR;ITEAIGIISK;LPQEEGDHQIADAETAEEVK;LPQEEGDHQIADAETAEEVKGR;LQPLTSVDSDNDFVTPKPR;LSDIDLAGPLQK;LSDPEGGVEEEPFHTIMK;MLDNFEC…		4.89028	4.99661	4.98303	4.55856	4.77415	4.65177	3.98431	3.92414	4.04274	4.89756	4.86595	4.90924	4.53869	4.48918	4.52961	4.05253	4.01727	3.88878	4.85818	4.88479	4.92473	4.56111	4.61799	4.53144	3.96986	3.98886	4.03728
sp|P62717|RL18A_MOUSE	13	AHSIQIMKVEEIAAGK;C[+57.0214635]HTPPLYR;DLTTAGAVTQC[+57.0214635]YR;EYRDLTTAGAVTQC[+57.0214635]YR;FTTKRPNTFF;FWYFVSQLK;FWYFVSQLKK;IFAPNHVVAK;KSSGEIVYC[+57.0214635]GQVFEK;SRFWYFVSQLK;SSGEIVYC[+57.0214635]GQVFEK;SSGEIVYC[+57.0214635]GQVFEKSPLR;VKNFGIWLR		6.93939	6.90754	6.99495	6.04562	6.28105	6.0368	5.84451	5.33269	5.7353	6.90555	6.72715	6.3474	5.88047	6.00996	6.0499	5.74218	5.16522	5.74335	6.85686	6.54841	6.93033	6.01465	6.14727	5.97014	5.73404	5.50268	5.48616
sp|Q6P542|ABCF1_MOUSE	18	AANAAENDFSVSQAEVSSR;ANDPYANLSK;EVLEALGEVMVNRPR;FGLESHAHTIQIC[+57.0214635]K;GAVIVVSHDAR;IGFFNQQYAEQLHMEETPTEYLQR;ILAGLGFDPEMQNRPTQK;LQGQLEQGDDTAAEK;LQGQLEQGDDTAAEKLEK;NLDFGIDMDSR;QAMLENASDIK;QAMLENASDIKLEK;QQPPEPEWIGDGEGTSPADKVVK;SFNLPYQDAR;SFNLPYQDARK;STLLLLLTGK;VVFAELAC[+57.0214635]R;YGLVGPNGK		5.25238	5.1974	5.21152	4.39663	4.25237	4.19863	4.04117	4.03702	4.05498	5.16164	5.24042	5.27588	4.36397	4.29157	4.31759	4.32402	4.2804	4.2999	5.24544	5.21939	5.16977	4.29726	4.32413	4.25814	4.00622	4.13272	3.97526
sp|P42227-2|STAT3_MOUSE;sp|P42227-3|STAT3_MOUSE;sp|P42227|STAT3_MOUSE	16	AILSTKPPGTFLLR;FLQESNVLYQHNLR;GLSIEQLTTLAEK;LENWITSLAESQLQTR;LLGPGVNYSGC[+57.0214635]QITWAK;LLQTAATAAQQGGQANHPTAAVVTEK;MQQLEQMLTALDQMR;QQLNNMSFAEIIMGYK;QQMLEQHLQDVR;SIVSELAGLLSAMEYVQK;SQGDMQDLNGNNQSVTR;TQIQSVEPYTK;VC[+57.0214635]IDKDSGDVAALR;VMNMEESNNGSLSAEFK;VVENLQDDFDFNYK;YLEQLHQLYSDSFPMELR		2.67326	2.64164	2.86926	2.33911	2.24704	2.26717	2.6683	2.65059	2.60448	2.66284	2.62966	2.83528	2.55002	2.40694	2.40101	3.28945	3.47185	3.29457	2.79127	2.94028	2.93667	2.46115	2.51124	2.53873	2.79918	2.76867	2.83859
sp|Q08943-2|SSRP1_MOUSE;sp|Q08943|SSRP1_MOUSE	18	ADVIQATGDAIC[+57.0214635]IFR;ASSGLLYPLER;EGINPGYDDYADSDEDQHDAYLER;ELQC[+57.0214635]LTPR;FDEISFVNFAR;FYVPPTQEDGVDPVEAFAQNVLSK;GFIYVHKPPVHIR;ITVPGNFQGHSGAQC[+57.0214635]ITC[+57.0214635]SYK;LFLLPHKDQR;NMSGSLYEMVSR;QGTQYTFSSIER;QGTQYTFSSIEREEYGK;QMFFVISLDPPIK;SDHPGISITDLSK;SFDFEIETK;TFDYKIPYTTVLR;TGKVDNIQAGELTEGIWR;VDNIQAGELTEGIWR		6.4542	6.46858	6.49964	6.04142	6.02804	5.89197	5.69093	5.55829	5.58199	6.39014	6.27817	6.27911	6.08955	5.83065	5.77519	5.42768	5.38588	5.43253	6.20396	6.31769	6.33382	5.87905	6.04462	5.83596	5.32513	5.52179	5.53231
sp|Q8R059|GALE_MOUSE	4	AVGESVQKPLDYYR;SVEFEEMDILDQAALQHLFK;VNLTGTIQLLEIMR;YFNPIGAHASGR		-1.82626	-1.57855	-1.68487	-1.04405	-0.977452	-0.925844	-1.11166	-0.953037	-0.704564	-2.04292	-1.27823	-1.47961	-0.967267	-0.879228	-1.93722	-0.586196	-0.311861	-0.0217377	-1.31095	-1.19283	-1.10765	-0.687933	-0.947932	-2.74231	-1.00668	-0.561847	-0.60908
sp|P50544|ACADV_MOUSE	20	ASNTSEVYFDGVK;EATQAVLDKPETLSSDASTR;ENMASLQSSPQHQELFR;FFEEVNDPAK;FGMAATLAGTMK;GIVNEQFLLQR;GQLTIDQVFPYPSVLSEEQAQFLK;IFEGANDILR;IHNFGVIQEK;IRENMASLQSSPQHQELFR;IWISNGGLADIFTVFAK;LFVALQGC[+57.0214635]MDK;NDALEKVEDDTLQGLK;NPFGNVGLLMGEAGK;SFGGVTHGLPEK;SGELAVQALDQFATVVEAK;SLSEGYPTAQHEK;TGIGSGLSLSGIVHPELSR;VAVNILNNGR;VPSENVLGEVGDGFK		2.07559	1.97084	1.98342	3.90899	3.86432	3.9282	4.51911	4.61113	4.48504	2.06094	2.02892	1.97981	4.25118	4.0948	4.18038	4.90715	5.09799	5.07383	1.91282	1.93315	2.19513	3.99269	4.09537	4.31847	4.38324	4.46451	4.53655
sp|Q08369|GATA4_MOUSE	6	EAAAYGSGGGAAGAGLAGR;EC[+57.0214635]VNC[+57.0214635]GAMSTPLWR;FSFPGTTGSLAAAAAAAAAR;HPNLDMFDDFSEGR;LSPQGYASPVTQTSQASSK;VGLSC[+57.0214635]ANC[+57.0214635]QTTTTTLWR		-4.12261	-3.77966	-3.89039	-0.256718	-0.78296	-0.732534	0.137309	0.145575	0.0763312	-3.80578	-4.44601	-3.84033	0.122785	0.271664	0.511519	1.55657	1.34343	1.45086	-3.46508	-4.82094	-3.48643	-0.506144	-0.526086	-0.0201863	0.361324	-0.192683	-0.390385
sp|P10854|H2B1M_MOUSE;sp|Q64478|H2B1H_MOUSE;sp|Q64525|H2B2B_MOUSE;sp|Q6ZWY9|H2B1C_MOUSE	3	AMGIMNSFVNDIFERIAGEASR;ESYSVYVYKVLK;KESYSVYVYK		5.8096	5.57942	5.52259	5.88622	5.58899	5.8033	5.72945	5.23828	5.39364	5.62807	5.48182	5.66523	5.95014	5.91794	5.91009	5.92574	5.82247	5.47255	5.73721	5.34933	5.58509	6.04537	5.85413	5.74229	5.95398	5.56862	5.58772
sp|Q99LG2|TNPO2_MOUSE	7	C[+57.0214635]SAAALDVLANVFR;DSQSPNTATQR;EELLPHLLPLLK;GDVEEDEAVPDSEQDIKPR;GLLFHPEWVVK;IC[+57.0214635]EDSSELLDSDALNRPLNIMIPK;QEC[+57.0214635]LNNIGDASSLIR		1.48088	1.53957	1.76395	0.735396	1.27239	0.914288	0.575587	0.692046	0.971953	1.20271	1.24159	0.996744	0.829608	0.826336	1.05449	0.511747	0.417381	0.589045	0.91055	0.99526	1.07899	0.442338	0.944642	0.567989	0.251462	0.37978	0.17405
sp|Q99PT1|GDIR1_MOUSE	8	AEEYEFLTPMEEAPK;IDKTDYMVGSYGPR;LTLVC[+57.0214635]STAPGPLELDLTGDLESFK;LTLVC[+57.0214635]STAPGPLELDLTGDLESFKK;QSFVLKEGVEYR;SIQEIQELDKDDESLR;TDYMVGSYGPR;VAVSADPNVPNVIVTR		5.85965	5.93842	6.01973	5.70732	5.74918	5.73749	5.73885	5.86336	5.8091	5.81487	5.82011	5.94694	5.76969	5.75329	5.91947	6.25451	6.32023	6.31466	5.83668	5.9179	5.96	5.51486	5.64564	5.82989	5.66608	5.62354	5.58569
sp|Q8CAQ8-2|MIC60_MOUSE;sp|Q8CAQ8-5|MIC60_MOUSE;sp|Q8CAQ8|MIC60_MOUSE	24	AVDEAADALLK;EIAGATPHITAAEGR;ELDSITPDITPGWK;GIEQAVQSHAVAEEEAR;GVYSEETLR;LAQQEKQEQVEMESLAK;LFGMVLGSAPYTVPLPK;LHNMIVDLDNVVK;LLSYASYC[+57.0214635]IEHGDLELAAK;LRGIEQAVQSHAVAEEEAR;LSEQELEFR;LSTDDLNSLIAHAHR;QEQVEMESLAK;SLEDALNR;STSETTEEAFSSSVR;TAMDNSEIAGEK;TAMDNSEIAGEKK;TIPYSDKLFGMVLGSAPYTVPLPK;TSSAEMPTIPLGSAVEAIR;TSSVTLQTITAQNAAVQAVK;VQEQELKYEFEQGLSEK;VVSQYHELVVQAR;YEFEQGLSEK;YSTSSSSGLTAGK		5.2307	5.09593	5.23093	4.72524	4.59015	4.71047	4.88291	4.85659	4.78029	5.20125	5.27844	5.61359	4.74556	4.6383	4.84993	4.99282	5.14128	5.03905	5.35228	5.46617	5.41159	4.91648	4.77217	5.18856	4.92115	4.8241	4.87451
sp|O08528|HXK2_MOUSE	34	AAQLC[+57.0214635]GAGMAAVVDK;AELLFQGK;ASGC[+57.0214635]EGEDVVTLLK;ASGC[+57.0214635]EGEDVVTLLKEAIR;AYQILVRLGLSPLQEDC[+57.0214635]VATHR;C[+57.0214635]DVSFLESEDGSGK;C[+57.0214635]DVSFLESEDGSGKGAALITAVAC[+57.0214635]R;DVSDIEDDKDGIQK;FLSQIESDC[+57.0214635]LALLQVR;GAALITAVAC[+57.0214635]R;GDFLALDLGGTNFR;GLGATTHPTAAVK;GSGTQLFDHIAEC[+57.0214635]LANFMDK;HIDMVEGDEGR;HLGLESTC[+57.0214635]DDSIIVK;IC[+57.0214…		7.20519	7.18132	7.2679	4.82926	4.89456	4.76139	4.34547	4.12923	4.31555	7.16853	7.06608	7.05835	4.56489	4.44727	4.48536	4.52062	4.43088	4.31688	7.03861	7.06802	7.1955	4.8593	4.98157	4.9514	4.80556	4.53297	4.36955
sp|Q99KR8|FUCO2_MOUSE	3	HGGYYTC[+57.0214635]SDR;VNGEAIYETHTWR;YFNANQWADILQASGAK		-3.77099	-2.05	-1.82564	-1.56129	-1.69793	-1.81238	-0.460644	-0.564547	-0.518778	-2.80169	-3.47818	-3.6161	-1.63893	-1.59836	-1.53697	-0.407506	-0.480748	-0.134416	-4.51788	-3.80934	-3.78361	-1.68802	-1.79023	-1.71395	-0.68261	-0.820092	-0.485179
sp|Q61188|EZH2_MOUSE	8	EC[+57.0214635]DPDLC[+57.0214635]LTC[+57.0214635]GAADHWDSK;ESSIIAPVPTEDVDTPPR;FANHSVNPNC[+57.0214635]YAK;FC[+57.0214635]QC[+57.0214635]SSEC[+57.0214635]QNR;IFEAISSMFPDKGTAEELK;NTETALDNKPC[+57.0214635]GPQC[+57.0214635]YQHLEGAK;TETLNQEWK;VLIGTYYDNFC[+57.0214635]AIAR		0.436917	0.508316	0.2896	-0.77344	-0.732828	-1.16796	-2.37567	-2.41798	-1.99152	0.158776	-0.242199	-0.731758	-0.955728	-1.28446	-0.851578	-2.63575	-3.34893	-2.4321	-0.195121	-0.174898	0.0261001	-1.09692	-1.09316	-1.36346	-2.5747	-2.37492	-2.71456
sp|Q8BFY9-2|TNPO1_MOUSE;sp|Q8BFY9|TNPO1_MOUSE	14	ATVGILITTIASK;DELLPHILPLLK;ESQSPDTTIQR;FSDQFPLPLK;GDVEEDETIPDSEQDIRPR;IC[+57.0214635]EDSAEILDSDVLDRPLNIMIPK;LEQLNQYPDFNNYLIFVLTK;MEYEWKPDEQGLQQILQLLK;NQVGDENWR;SEC[+57.0214635]LNNIGDSSPLIR;SHAVAC[+57.0214635]VNQFIISR;SNILTLMYQC[+57.0214635]MQDK;YAHWVVSQPPDTYLKPLMTELLK;YSDIDIILLK		5.14202	5.15958	5.27488	4.99168	5.02498	4.78236	4.79347	4.79146	4.97561	5.10348	5.02649	4.83102	5.03673	4.94762	5.12183	5.05793	4.71064	5.06284	5.11383	5.00557	5.15246	4.8372	4.97575	4.94289	4.866	4.79704	4.70168
sp|P59235|NUP43_MOUSE	6	HHGDVMDLQFFDQER;HPDQQHVVATGGQDGMLSIWDVR;IEITSLLPSR;QQGSEPC[+57.0214635]QILSLTGDR;TIDNADSSTLHAVTFLR;TPEIVTVNSIGQLK		3.76027	3.6844	3.773	3.11431	3.01007	2.97259	2.74601	2.78223	2.68166	3.74419	3.75164	3.87582	3.07777	2.99914	3.14879	2.74723	2.87522	2.67026	3.76301	3.83381	3.70226	3.28701	3.27463	3.50933	2.94983	3.0591	2.78686
sp|P70699|LYAG_MOUSE	16	EGYIIPLQGPSLTTTESR;FSETAQQAMR;GAYTLVTFSAK;GDTVARPLFLEFPEDPSTWSVDR;GQWLTLEAPLDTINVHLR;NHNDLNSVPQEPYR;QLLWGPALLITPVLEPGK;QLLWGPALLITPVLEPGKTEVTGYFPK;RDFTFNQDSFADFPDMVR;STGGILDVYVFLGPEPK;THFPLDVQWNDLDYMDAR;WGYSSTAIVR;WTQLGAFYPFMR;YAGHWTGDVR;YALLPYLYTLFHR;YMMIVDPAISSAGPAGSYRPYDEGLRR		1.95648	1.69389	1.93602	4.61997	4.4493	4.59229	6.32406	6.34381	6.20147	1.87309	1.57131	1.74785	4.98503	4.7517	4.62666	6.40182	6.78036	6.41465	1.31611	1.81078	1.68251	4.62418	4.75463	4.47097	6.02612	6.29446	6.61449
sp|Q8VDN2|AT1A1_MOUSE	26	AAVPDAVGK;AC[+57.0214635]VVHGSDLK;AC[+57.0214635]VVHGSDLKDMTSEELDDILR;ADIGVAMGIVGSDVSK;AVAGDASESALLK;AVFQANQENLPILK;C[+57.0214635]IEVC[+57.0214635]C[+57.0214635]GSVMEMR;C[+57.0214635]SSILLHGK;DAFQNAYLELGGLGER;DGPNALTPPPTTPEWVK;DMTSEELDDILR;EQPLDEELKDAFQNAYLELGGLGER;GVGIISEGNETVEDIAAR;IISANGC[+57.0214635]KVDNSSLTGESEPQTR;IVEIPFNSTNK;KADIGVAMGIVGSDVSK;LNIPVNQVNPR;MSINAEDVVVGDLVEVK;NIAFFSTNC[+57.021…		6.28382	6.20196	6.3842	6.02694	5.99752	5.98511	6.08553	6.16439	6.07827	6.29754	6.28597	6.50408	6.33562	6.20092	6.31009	6.63479	6.90494	6.70813	6.22707	6.38089	6.33921	6.0964	6.24696	6.35663	6.25713	6.24586	6.18664
sp|P46638|RB11B_MOUSE	8	AQIWDTAGQER;DHADSNIVIMLVGNK;GAVGALLVYDIAK;HLTYENVER;NEFNLESK;NNLSFIETSALDSTNVEEAFK;STIGVEFATR;VVLIGDSGVGK		4.58892	4.62478	4.5961	5.59206	5.30317	5.44387	5.78619	5.95231	5.80469	4.5841	4.72707	4.90452	5.61836	5.49352	5.72866	6.31887	6.19657	6.33051	4.98353	4.77234	4.84765	5.6316	5.21091	5.60792	6.03372	5.82969	5.79601
sp|Q60930|VDAC2_MOUSE	13	DIFNKGFGFGLVK;GFGFGLVKLDVK;LTFDTTFSPNTGK;LTFDTTFSPNTGKK;LTLSALVDGK;SC[+57.0214635]SGVEFSTSGSSNTDTGK;SC[+57.0214635]SGVEFSTSGSSNTDTGKVSGTLETK;TGDFQLHTNVNNGTEFGGSIYQK;VNNSSLIGVGYTQTLRPGVK;WC[+57.0214635]EYGLTFTEK;WNTDNTLGTEIAIEDQIC[+57.0214635]QGLK;YKWC[+57.0214635]EYGLTFTEK;YQLDPTASISAK		6.38769	6.39777	6.4005	6.85413	6.77236	6.72828	6.69679	6.67125	6.66788	6.34108	6.37233	6.4418	6.9405	6.69067	6.84434	6.88804	7.04081	6.97791	6.40997	6.51745	6.49032	6.98072	7.08278	7.33543	6.86737	6.82895	6.79811
sp|Q99JW5|EPCAM_MOUSE	5	ESPYDHQSLQTALQEAFTSR;IKPEGAIQNNDGLYDPDC[+57.0214635]DEQGLFK;TDKDTEITC[+57.0214635]SER;TQDDVDIADVAYYFEK;VNGEPLDLDPGQTLIYYVDEK		2.19582	2.20592	2.36688	2.1036	1.85027	1.86006	1.82917	2.03445	1.94024	1.76523	1.92204	2.05939	1.71219	1.69233	1.83553	1.35336	1.18236	1.32851	2.20267	2.17044	2.10779	2.07487	2.05639	2.42603	1.95989	2.07898	2.14409
sp|Q6PFD9|NUP98_MOUSE	29	AGVSTNISTK;ALSMYEEAFQNTPEGDK;ASLLVDEEDVDAMDQR;DSPGDFLELPIVK;EVIVYVDDNQKPPVGEGLNR;EYRPETGSWVFK;FASGTFLSPSASVQEC[+57.0214635]R;FSFLSKPVDENNQQDGEDDSLVSR;FYTNPIAKPIPQTPESVGNK;GEC[+57.0214635]IVSDFTIGR;GFLEDLAPPER;HC[+57.0214635]QLSETPESWAK;HLASDAIINENYDYLK;IFALLAGKPVWQLSEQK;IQQVDC[+57.0214635]SGYELEHLHTK;ITNEKGEC[+57.0214635]IVSDFTIGR;KLDEDLQLYQTPLELK;LADINYEGR;LALLLSQLVGSQSVR;LC[+57.0214635]VPAEWIHE…		4.95462	4.98246	4.9644	4.78323	4.55117	4.64627	4.37575	4.42666	4.36769	4.96817	5.05199	5.15318	4.64661	4.60441	4.64512	4.56589	4.73537	4.54717	5.06351	5.10449	5.022	4.85693	4.74684	5.00661	4.58249	4.4999	4.48117
sp|Q9WTL7|LYPA2_MOUSE	3	ETAAVIFLHGLGDTGHSWADALSTIR;MVMPSWFDLMGLSPDAPEDEAGIKK;TYPGVMHSSC[+57.0214635]PQEMAAVK		-1.48387	-1.40401	-1.09361	-0.486301	-0.895426	-0.64717	-0.266057	-0.189992	-0.300171	-1.25573	-1.79764	-0.74826	-0.640492	-0.653153	-0.962131	0.16927	0.615551	-0.0945812	-0.938278	-1.21876	-0.99084	-0.442864	-1.04391	-1.25939	-0.401015	-0.297448	-0.142678
sp|Q9QZQ8-2|H2AY_MOUSE;sp|Q9QZQ8|H2AY_MOUSE	7	AISSYFVSTMSSSIK;EFVEAVLELR;FVIHC[+57.0214635]NSPVWGADK;FVIHC[+57.0214635]NSPVWGADKC[+57.0214635]EELLEK;GVTIASGGVLPNIHPELLAK;NC[+57.0214635]LALADDR;SIAFPSIGSGR		3.1997	3.22085	3.03067	4.40663	4.43131	4.33578	4.39119	4.53344	4.40871	3.04766	2.98837	3.05459	4.2206	4.18503	4.47006	4.24614	4.36156	4.12369	2.77187	2.8411	2.90591	4.35368	4.37291	4.5576	4.25741	4.39735	4.46616
sp|Q60597|ODO1_MOUSE	39	AEQFYC[+57.0214635]GDTEGK;AEQFYC[+57.0214635]GDTEGKK;DPAAAPATGNK;DPAAAPATGNKK;DVVVDLVC[+57.0214635]YR;ELEQIFC[+57.0214635]QFDSK;FETPGIMQFTNEEK;FGLEGC[+57.0214635]EVLIPALK;FLDTAFDLDAFK;FLDTAFDLDAFKK;HHVLHDQNVDKR;HWLDSPWPGFFTLDGQPR;IC[+57.0214635]EEAFTR;KELEQIFC[+57.0214635]QFDSK;KPLIVFTPK;LEAADEGSGDMK;LGFYGLHESDLDK;LNVLANVIR;LVEDHLAVQSLIR;NITLSLVANPSHLEAADPVVMGK;NMEEEVAITR;NQGYYDYVKPR;NTNAGAPPGTAY…		5.06743	5.08908	5.01985	5.57542	5.53625	5.46642	5.63606	5.63224	5.63473	5.07395	5.03006	5.03992	5.83061	5.54605	5.61303	6.00129	6.20604	6.07233	4.97034	5.05256	5.02879	5.59794	5.72124	5.63369	5.52789	5.64111	5.57343
sp|O55128|SAP18_MOUSE	6	FQIGDYLDIAITPPNR;FQIGDYLDIAITPPNRAPPSSGR;GNVPSSELQIYTWMDATLKELTSLVK;GTDDSMTLQSQK;KGTDDSMTLQSQK;VKEIGSTMSGR		2.01987	1.75916	1.84303	1.90345	1.3033	1.33188	1.42501	1.20684	1.04632	2.10567	1.79391	1.82306	1.80318	1.50512	0.7218	1.41067	1.47931	1.40247	1.87689	1.64632	1.85026	1.7775	1.42381	1.01536	1.21823	1.42971	1.58215
sp|P97310|MCM2_MOUSE	30	AIFTTGQGASAVGLTAYVQR;C[+57.0214635]TVIAAANPIGGR;DNNDLLLFILK;DTVDPVQDEMLAR;DYVMEDDVNMAIR;ESLVVNYEDLAAR;ESMATGSIPITVR;EWTLEAGALVLADR;EWVSMAGPR;FDVLC[+57.0214635]VVR;FGAQQDTIEIPEK;FGAQQDTIEIPEKDLMDK;GDINVLLC[+57.0214635]GDPGTAK;GLALALFGGEPK;GLLYDSSEEDEERPAR;GVC[+57.0214635]LIDEFDK;GVC[+57.0214635]LIDEFDKMNDQDR;IFASIAPSIYGHEDIK;IFASIAPSIYGHEDIKR;QINIHNLSAFYDSDLFK;QLVAEQVTYQR;THVDSHGHNVFK;THVDSHGHNVFK…		7.28911	7.32054	7.38344	6.53787	6.64733	6.46244	6.09657	6.06601	6.14272	7.23545	7.17853	7.20475	6.48773	6.4201	6.52607	5.98046	5.97543	5.89785	7.09883	7.19852	7.25719	6.38798	6.58309	6.61998	5.97387	6.13376	6.06893
sp|Q8R307|VPS18_MOUSE	3	AVEDTEAQGFAGLFAAYTDHPPPFR;IEDVLPFFPDFVTIDHFK;VVAYHC[+57.0214635]QHEAYEEALAVLAR		-3.42294	-2.89247	-2.74983	-2.61937	-2.22447	-2.49918	-2.18153	-1.94204	-2.14147	-3.18085	-2.95503	-2.77012	-2.40566	-2.21938	-2.83002	-1.72282	-1.39536	-1.42019	-3.10334	-2.6737	-2.70978	-2.10215	-2.27042	-4.75214	-2.25878	-1.71268	-1.67736
sp|Q8JZX4|SPF45_MOUSE	5	C[+57.0214635]VIFEIPGAPDDEAVR;IIVGDATEKGEAQDASK;NMVGAGEVDEDLEVETKEEC[+57.0214635]EK;QSTVLAPVIDLK;SMGGAAIAPPTSLVEK		3.08351	2.83079	3.13017	2.10624	2.1042	1.90461	1.65968	1.75048	1.89274	2.90234	2.84036	2.7311	1.82274	2.08862	2.4281	1.65884	1.10389	1.55385	2.83928	2.91318	2.93976	1.97144	1.90575	2.49751	1.57039	1.59438	1.41113
sp|Q6A4J8-2|UBP7_MOUSE	25	AGFIQDTSLILYEEVKPNLTER;ALDELMDGDIIVFQK;AVYMMPTEGDDSSK;DDPENDNSELPTAK;DLLQFFKPR;EEAIEHNYGGHDDDLSVR;EEEITLYPDK;EVFGTFGIPFLLR;FAIVMMGR;FLTLPPVLHLQLMR;FMYDPQTDQNIK;HQYINEDEYEVNLK;IIGVHQEDELLEC[+57.0214635]LSPATSR;INDRFEFPEQLPLDEFLQK;IQDYDVSLDK;IQSLLDIQEKEFEK;LNTDPMLLQFFK;LSEVLQAVTDHDIPQQLVER;MVSYIQC[+57.0214635]K;NSSLAEFVQSLSQTMGFPQDQIR;RPAMLDNEADGNK;SFGWETLDSFMQHDVQELC[+57.0214635]R;SLNYC[+57.021463…		5.90251	6.02953	6.09476	5.09797	5.11809	5.14804	4.73975	4.67396	4.77133	5.86126	5.89051	6.02062	5.1911	4.9962	4.81021	4.71506	4.97205	4.7494	5.74586	5.91811	5.90133	5.01615	5.14615	4.82954	4.44007	4.72174	4.80878
sp|P62320|SMD3_MOUSE	3	FLILPDMLK;VAQLEQVYIR;VLHEAEGHIVTC[+57.0214635]ETNTGEVYR		5.05102	5.24659	5.24081	4.68964	4.67867	4.61845	4.30367	4.57018	4.55052	5.07285	5.30483	5.6014	4.66237	4.71551	4.88143	4.66128	4.84284	4.64295	5.35408	5.16061	5.28516	4.95182	4.68336	4.7735	4.60324	4.46249	4.57821
sp|Q8K4Z5|SF3A1_MOUSE	22	ASKPLPPAPAPDEYLVSPITGEK;DSNSLAYYNMASGAVIHLALK;EKQSDDEVYAPGLDIESSLK;EVLDQVC[+57.0214635]YR;FNFLNPNDPYHAYYR;IGEEEIQKPEEK;IHEATGMPAGK;KIGEEEIQKPEEK;LNGQGLVFTLPLTDQVSVIK;LQYEGIFIK;NYQFDFLRPQHSLFNYFTK;QPIEEEASSK;QSDDEVYAPGLDIESSLK;QSDDEVYAPGLDIESSLKQLAER;RTDIFGVEETAIGK;TDIFGVEETAIGK;TEDSLMPEEEFLR;TEDSLMPEEEFLRR;TQQAAQANITLQEQIEAIHK;VMQQQQQATQQQLPQK;VQAQVIQETIVPK;VTWDGHSGSMAR		4.54942	4.4854	4.51393	4.04121	3.5831	3.73259	3.57802	3.69	3.63666	4.40302	4.60943	4.6379	3.59276	3.78519	4.09795	3.78018	3.70065	3.68246	4.67965	4.6325	4.47612	4.06984	3.64899	4.13399	3.74833	3.71515	3.68039
sp|A2AN08-3|UBR4_MOUSE;sp|A2AN08-5|UBR4_MOUSE;sp|A2AN08|UBR4_MOUSE	51	AAQFVDLLGYFSLK;AGAQGDPDVPEC[+57.0214635]LK;ALGTLGMTTNEK;APSYIEIFGR;AVSNINTLLDKADR;AYLLQNLNEEGSTEKPSQEK;C[+57.0214635]NGLLPVWGPHVPESAFATC[+57.0214635]LAR;DNPEATQQMNDLIIGK;DSDQLEVIQENR;EDDYESDAATIVQK;ELPQLVASVIESESEILHHEK;FAMEQSFSADTGGGGR;FYC[+57.0214635]VLSTEASEEDLNR;GWETDGPPAVLSIMAQSTSTQR;HFSSDAAPQPR;HNDMPIYEAADK;HNTYLQEC[+57.0214635]TGQR;IISLDLPVAEVYKK;ILGPAESDEFLAR;ITVLQLSALLK;LENPDEAC[+57.0214…		4.64115	4.71937	4.73633	4.23991	4.28945	4.3571	4.23484	4.12636	4.34134	4.69889	4.7031	4.70799	4.37597	4.14954	4.1604	4.56382	4.73378	4.53458	4.58103	4.79152	4.80262	4.15024	4.33087	4.12574	4.21606	4.16008	4.22755
sp|P42932|TCPQ_MOUSE	40	AHEILPELVC[+57.0214635]C[+57.0214635]SAK;AIAGTGANVIVTGGK;ALAENSGVKANEVISK;APGFAQMLKDGAK;AVDDGVNTFK;AVDDGVNTFKVLTR;DMLEASILDTYLGK;DMLEASILDTYLGKYWAIK;DVDEVSSLLR;EDGAISTIVLR;ELEVQHPAAK;ETEGDVTSVK;ETEGDVTSVKDAK;FAEAFEAIPR;GEENLMDAQVK;GSTDNLMDDIER;GSTDNLMDDIERAVDDGVNTFK;HEKEDGAISTIVLR;HFSGLEEAVYR;IAVYSC[+57.0214635]PFDGMITETK;IAVYSC[+57.0214635]PFDGMITETKGTVLIK;IGLSVSEVISGYEIAC[+57.0214635]K;ILGSGIYS…		8.97389	8.98695	9.0582	8.28361	8.20526	8.24403	7.90569	7.95702	7.8514	8.97229	8.97984	9.14995	8.27468	8.04939	8.0897	7.96282	8.15323	7.93646	8.95608	9.0264	8.98931	8.19007	8.24759	8.3874	7.77887	7.89767	7.90367
sp|Q9JJY4|DDX20_MOUSE	11	AAAPVQAVEPTPASPWTQR;AAGFERPSPVQLK;AAMHTYSSPTVATQSPK;AAPPQESGC[+57.0214635]PAQLEEQVK;AQHLADILSSK;MEGLEC[+57.0214635]HVFIGGTPLSQDK;NSVQTSVEDSSSNSQHQAK;QLIELDYLNPGSIR;QYYQVVNSYPLAHK;VPFNQALVFSNLHSR;VQSEPQEESWYDC[+57.0214635]HR		2.0218	1.89214	2.20805	0.423243	0.361286	0.526399	-0.115233	-0.174939	-0.0714694	1.99302	1.95962	2.44053	0.39059	0.36265	0.566827	-0.167435	-0.246886	-0.342089	1.87441	2.14182	2.06304	0.528929	0.559937	0.819446	-0.336483	0.102077	0.0707822
sp|Q8BG32|PSD11_MOUSE	14	ALLVEVQLLESK;DDPIISTHLAK;DIQENDEEAVQVK;DIQENDEEAVQVKEQSILELGSLLAK;EASIDILHSIVK;EQSILELGSLLAK;IMLNTPEDVQALVSGK;LQATLDMQSGIIHAAEEK;LVSLYFDTK;LYDNLLEQNLIR;TGQAAELGGLLK;TYEAALETIQNMSK;TYHALSNLPK;YQEALHLGSQLLR		4.10144	4.22434	4.00057	3.61586	3.64066	3.76644	3.50671	3.80266	3.59973	4.22046	4.31856	4.47904	3.25376	3.48294	3.94393	3.76645	3.44571	3.79979	4.69261	4.21383	4.48343	4.09243	3.39698	3.82011	4.02116	3.57498	3.5481
sp|Q9DBG3-2|AP2B1_MOUSE;sp|Q9DBG3|AP2B1_MOUSE	13	APEVSQYIYQVYDSILK;DSDYYNMLLK;DVSSLFPDVVNC[+57.0214635]MQTDNLELKK;EC[+57.0214635]HLNADTVSSK;GLEISGTFTHR;LAPPLVTLLSGEPEVQYVALR;LHDINAQMVEDQGFLDSLR;LLSTDPVTAK;LQNNNVYTIAK;LQNNNVYTIAKR;LTNGIWILAELR;SQPDMAIMAVNSFVKDC[+57.0214635]EDPNPLIR;VNYVVQEAIVVIR		3.66602	3.83349	3.95731	3.91695	3.87299	4.05924	3.59953	3.68278	3.77253	3.58069	3.75259	3.72609	3.95372	3.85579	3.84628	3.967	4.16428	4.15618	3.71347	3.7448	3.80117	3.8504	3.81344	3.85771	3.54758	3.61018	3.63921
sp|Q9DAR7|DCPS_MOUSE	8	AHLLAQVIENLEC[+57.0214635]DPK;EAGVGNGTSAPVR;EQEAEEAETPSTEEK;TDDPLLQLLQK;TPFQVEHVAQLLTGSPELK;TTVVYPATEK;VNEDSGDTHGEDAVVILEK;WNQQQLDDLYLIAIC[+57.0214635]HR		2.53175	2.56883	2.79678	2.36225	2.13813	2.29994	2.2411	2.36458	2.37329	2.58579	2.63964	2.93064	2.23014	2.07646	2.34	2.21867	2.1232	2.29968	2.77472	2.57509	2.80662	2.42052	2.12825	2.45077	2.0746	2.25604	2.46391
sp|Q61595-10|KTN1_MOUSE;sp|Q61595-11|KTN1_MOUSE;sp|Q61595-12|KTN1_MOUSE;sp|Q61595-13|KTN1_MOUSE;sp|Q61595-14|KTN1_MOUSE;sp|Q61595-15|KTN1_MOUSE;sp|Q61595-16|KTN1_MOUSE;sp|Q61595-2|KTN1_MOUSE;sp|Q61595-3|KTN1_MOUSE;sp|Q61595-4|KTN1_MOUSE;sp|Q61595-5|KTN1_MOUSE;sp|Q61595-6|KTN1_MOUSE;sp|Q61595-7|KTN1_MOUSE;sp|Q61595-8|KTN1_MOUSE;sp|Q61595-9|KTN1_MOUSE;sp|Q61595|KTN1_MOUSE	17	AC[+57.0214635]VAGTSDAEAVK;DAVSNTTNQLESK;EASEMHTLLQLEC[+57.0214635]EK;EIIDMIKPDHVEGIQK;FQQVQEQMEAEIAHLK;GELSGLLHQLQEK;LKEASEMHTLLQLEC[+57.0214635]EK;LLEEQLQHEVASK;LMQLMESEQKR;LQTAVSQQPNKDVVEQMEK;MHASYQETQQMQMK;NAEQAATQLK;QSDQVSFVSLIEDLKR;SVEELLEVELLK;TAEHEAAQQDLQSK;TMMFSEDEALC[+57.0214635]VVDLLK;TVEELLETGLIQVATR		1.11855	0.856763	0.871644	1.60312	1.2214	1.26006	1.19084	1.03349	1.37973	0.862798	1.01468	1.01925	1.15397	1.15206	1.33383	1.13373	0.9686	0.905364	1.0278	0.963693	1.02682	1.68697	1.02464	1.23778	1.26252	1.16489	1.4249
sp|P62983|RS27A_MOUSE	5	C[+57.0214635]C[+57.0214635]LTYC[+57.0214635]FNKPEDK;EC[+57.0214635]PSDEC[+57.0214635]GAGVFMGSHFDR;EC[+57.0214635]PSDEC[+57.0214635]GAGVFMGSHFDRHYC[+57.0214635]GK;REC[+57.0214635]PSDEC[+57.0214635]GAGVFMGSHFDR;YYKVDENGK		5.39647	5.17054	5.33196	4.00851	4.35833	3.84242	3.8949	3.70996	3.91917	5.05587	5.00407	4.0622	4.37952	4.38857	4.49804	3.97756	3.73373	3.70573	5.06774	4.96338	5.14493	3.73924	4.45017	4.68596	3.66886	3.82089	3.66125
sp|Q8CIE6|COPA_MOUSE	50	ASNLENSTYDLYTIPK;AWEVDTC[+57.0214635]R;C[+57.0214635]LFTLLGHLDYIR;C[+57.0214635]PLSGAC[+57.0214635]YSPEFK;C[+57.0214635]PLSGAC[+57.0214635]YSPEFKGQIC[+57.0214635]R;DADSITLFDVQQK;DADSQNPDAPEGK;DADSQNPDAPEGKR;ERPAYAVHGNMLHYVK;ETFDPEKETIPDIDPNAK;FWVLAAHPNLNLFAAGHDGGMIVFK;GFFEGSIASK;GHYNNVSC[+57.0214635]AVFHPR;GITGVDLFGTTDAVVK;GNNVYC[+57.0214635]LDR;GVNWAAFHPTMPLIVSGADDR;GYPEVALHFVK;HAIVIC[+57.021463…		5.97787	6.01196	6.13155	6.59449	6.68465	6.61411	6.86632	6.85397	6.87397	5.99525	6.00622	6.10542	6.83358	6.63375	6.67939	7.41866	7.66544	7.48631	5.84102	6.00145	6.02746	6.41616	6.71125	6.62745	6.74474	6.78042	6.74129
sp|Q9WV54|ASAH1_MOUSE	12	ATSFVGYVGMLTGFKPGLFSLSLNER;DAQWVGFITR;ESLDVYELDPK;ILVNSITSLVNTFVPSGK;IMAPVYFILGGK;IMAPVYFILGGKK;KESLDVYELDPK;LPGMIGSLPDPFGEEMR;LTVFTTLMDVTK;NLSFATIYDVLSTKPVLNK;SGEGC[+57.0214635]VITR;WYVVQTNYDR		2.52674	2.56707	2.63334	4.8483	4.70309	4.71378	6.35782	6.46746	6.39721	2.59287	2.52191	2.50289	5.2451	4.96426	4.93783	6.57009	6.77712	6.77892	2.70681	2.80543	2.74861	4.78714	4.75768	4.31186	6.13714	6.24528	6.39166
sp|Q80X82|SYMPK_MOUSE	16	AEVLSFILEDVR;ATNLC[+57.0214635]FAER;AVAC[+57.0214635]SGAAQVR;AYLGMSTLGDLIFK;DTEVAAPWTEETVK;FALNYLQLLVHPNPPSVLFGADK;FLIPVLNGLEK;GMGMNSPELLLLVENC[+57.0214635]PK;ILASLVTQFDSGFK;LEPNLGEDDEDKDLEPGPSGTSK;LGGFVMNILAR;LIANLNMLLR;LMATQMTAAGLGPGVEQTK;LSDVLKPLTDAQVEAMK;VVDLLNQAALITNDSK;VVLEAPLITESALEVIR		3.34112	3.4763	3.50532	3.1707	3.25421	3.3142	2.82217	2.80524	2.99591	3.38274	3.34762	3.54492	3.1657	3.06417	3.02285	2.86955	2.67051	2.86157	3.39993	3.28169	3.55864	3.18789	3.14004	3.1177	2.7789	2.71369	2.85195
sp|P46061|RAGP1_MOUSE	18	AFSC[+57.0214635]SSFNSNTFLTR;ALAPLLLAFVTKPNGALETC[+57.0214635]SFAR;DAALVVAEAVADKAELEK;EIEEFDGLEALR;ELNLSFC[+57.0214635]EIKR;GAVAIADAVR;ILAAALTEC[+57.0214635]HR;ILAAALTEC[+57.0214635]HRK;LEGNTVGVEAAR;LNNC[+57.0214635]GMGIGGGK;QVEVINFGDC[+57.0214635]LVR;SPAC[+57.0214635]FTLQELK;TAVLDAIDALMK;TAVLDAIDALMKK;TQVAGGQLSFK;VINLNDNTFTEKGGVAMAETLK;VSVLIVQQTDTSDPEK;VSVLIVQQTDTSDPEKVVSAFLK		4.69458	4.79961	4.6999	4.43862	4.42445	4.3249	3.839	3.93461	4.1275	4.54008	4.53793	4.60084	4.3265	4.34084	4.43635	4.11828	3.89677	4.03037	4.69718	4.58392	4.74835	4.4638	4.37935	4.54029	3.98405	3.98692	3.91109
sp|P50247|SAHH_MOUSE	22	AGIPVFAWK;ALDIAENEMPGLMR;DGPLNMILDDGGDLTNLIHTK;EMYSASKPLK;EMYSASKPLKGAR;ESLIDGIKR;FDNLYGC[+57.0214635]R;GETDEEYLWC[+57.0214635]IEQTLHFK;GISEETTTGVHNLYK;KALDIAENEMPGLMR;KLDEAVAEAHLGK;LDEAVAEAHLGK;QAQYLGMPINGPFKPDHYR;SKFDNLYGC[+57.0214635]R;VADIGLAAWGR;VADIGLAAWGRK;VAVVAGYGDVGK;VAVVAGYGDVGKGC[+57.0214635]AQALR;VNIKPQVDR;VPAINVNDSVTK;WLNENAVEK;WSSC[+57.0214635]NIFSTQDHAAAAIAK		7.35373	7.33738	7.4124	7.08496	7.04475	7.00329	6.7026	6.76516	6.69492	7.3545	7.37205	7.57004	7.09608	6.9608	7.0198	6.58289	6.66219	6.62043	7.48437	7.49385	7.51022	7.15727	7.19051	7.39932	6.75682	6.79145	6.84674
sp|P10852-2|4F2_MOUSE;sp|P10852|4F2_MOUSE	15	DVELNELEPEKQPMNAADGAAAGEK;EALSSWLQDGVDGFQFR;GQNEDPGSLLTQFR;IGDLQAFVGR;IKVAEDETEAGVK;LGASNLPAGISLPASAK;LLLSTDSAR;NQKDEINETDLK;QINPTLGSQEDFK;QINPTLGSQEDFKDLLQSAK;QPMNAADGAAAGEK;SHLEYLSTLK;SLLHGDFHALSSSPDLFSYIR;VAEDETEAGVK;YLVVLNFR		5.56799	5.64332	5.52756	4.60999	4.56692	4.70245	4.19216	4.10912	4.12477	5.62957	5.61394	5.77885	4.74305	4.59049	4.65251	4.37349	4.62345	4.38533	5.60109	5.69987	5.58702	4.65292	4.69701	4.79749	4.27262	4.36024	4.36594
sp|Q9CYI4|LUC7L_MOUSE	5	AEQLGAEGNVDESQK;ALLDQLMGTAR;LAETQEEISAEVSAK;MDLGEC[+57.0214635]TK;SHLLDC[+57.0214635]C[+57.0214635]PHDILAGTR		3.96095	3.94477	3.93309	2.46286	2.54524	2.2269	1.88757	1.96493	1.85277	3.83932	3.75663	3.90822	2.43551	2.25416	2.53252	1.89247	2.15672	1.72929	3.89398	3.76474	4.0004	2.16313	2.33678	2.50907	1.44677	1.61753	1.539
sp|Q62241|RU1C_MOUSE	3	FYC[+57.0214635]DYC[+57.0214635]DTYLTHDSPSVR;WMEEQAQSLIDK;WMEEQAQSLIDKTTAAFQQGK		-0.198681	-0.567017	-0.27015	-1.09556	-0.703366	-0.983289	-0.854337	-0.809365	-0.467506	-0.870352	-0.283559	-0.475172	-1.31748	-0.283388	0.455743	-0.658901	-0.624077	-0.568843	-0.153408	-0.502753	-0.259895	-0.368197	-0.781796	-0.163942	-0.214045	-0.555429	-0.836405
sp|P08228|SODC_MOUSE	10	AVC[+57.0214635]VLKGDGPVQGTIHFEQK;DGVANVSIEDR;DGVANVSIEDRVISLSGEHSIIGR;GDGPVQGTIHFEQK;HVGDLGNVTAGK;HVGDLGNVTAGKDGVANVSIEDR;KHGGPADEER;QDDLGKGGNEESTK;TMVVHEKQDDLGK;VISLSGEHSIIGR		7.65118	7.26091	7.32076	7.54253	6.92562	6.95627	6.67279	7.00516	6.5866	7.32029	7.67758	7.83059	6.97142	7.1683	7.27722	6.67252	6.75575	6.68992	7.84191	7.66224	7.43223	7.57958	7.16373	8.03861	6.90759	7.00061	6.99674
sp|P28660|NCKP1_MOUSE	15	AAEDLFVNIR;AIIGLYNYAHEMTHGASDR;AINQIAAALFTIHK;EAAVSHAGSMHR;EYLTSHLEIR;FLSESLMWHISSQVAELK;LGQMIVDYENPLKK;LVVENVDVLTQMR;MFQQC[+57.0214635]LELPSQSR;MMNTIIFHTK;NNNQQLAQLQK;QVSNGHIAYFPAMK;SIVGMTMYNQATQEIAKPSELLTSVR;SLSLC[+57.0214635]NMFLDEMAK;TSFDKPDQMAALFK		2.42879	2.60959	2.52344	2.53029	2.68212	2.74836	2.7904	2.83555	2.79764	2.4913	2.42905	2.33748	2.55649	2.53413	2.5315	2.72082	2.46193	2.73861	2.40141	2.44095	2.55323	2.57586	2.55975	2.63521	2.69244	2.71646	2.84278
sp|Q5SUR0|PUR4_MOUSE	25	AC[+57.0214635]VEAPGGNPIC[+57.0214635]SLHDQGAGGNGNVLK;AFHITQGLLK;ANQELGLALDSWDLDFYTKR;AVVVEEPVGELR;C[+57.0214635]LELGHTGEAGPQAMAR;C[+57.0214635]PAC[+57.0214635]FVGTITGDKR;C[+57.0214635]SGNWMWAAK;ELSDPEGAIIYTSR;EWIKPIMFSGGIGSMEAK;FC[+57.0214635]DNSSAIQGK;FGEPVLAGFAR;GHLLYVPLSPGQHR;GMEGSVLPVWSAHGEGYMAFSSPELQAK;GSIDILAEGRPALEK;GVAFVGGFSYADVLGSAK;GWAAAVTFNPQAR;HVVFTAETHNFPTGVAPFSGATTGTGGR;KPPVLQPLALP…		5.70689	5.62058	5.78763	4.82075	4.6178	4.5989	4.06691	4.06001	4.0123	5.61101	5.58488	5.73991	4.81447	4.64094	4.57727	3.94927	4.12569	3.93656	5.54511	5.59115	5.53544	4.67166	4.75398	4.72755	3.72526	4.08101	4.08595
sp|Q7TPR4|ACTN1_MOUSE	30	AGTQIENIEEDFRDGLK;ASIHEAWTDGKEAMLR;DDPLTNLNTAFDVAER;DGLGFC[+57.0214635]ALIHR;DYETATLSEIK;ETADTDTADQVMASFK;GISQEQMNEFR;HTNYNMEHIR;IC[+57.0214635]DQWDNLGALTQK;IDQLEC[+57.0214635]DHQLIQEALIFDNK;ILAGDKNYITEDELR;ISIEMHGTLEDQLSHLR;KDDPLTNLNTAFDVAER;KQFGAQANVIGPWIQTK;LAILGIHNEVSK;LGVVTFQAFIDFMSR;LLETIDQLYLEYAK;LLETIDQLYLEYAKR;LVSIGAEEIVDGNVK;MLDAEDIVGTARPDEK;MVSDINNAWGC[+57.0214635]LEQAEK;NVNIQNFHISWK;N…		4.69941	4.65092	4.69309	5.33863	5.22515	5.10421	5.08922	5.17564	5.18989	4.51345	4.6049	4.66286	5.1561	5.2088	5.45261	5.8192	5.40932	5.85509	4.6825	4.58202	4.68094	5.49778	5.27579	5.51514	5.46889	5.09013	4.98087
sp|P97311|MCM6_MOUSE	32	AEAVESAQAGDR;AEAVESAQAGDRC[+57.0214635]DFTGALIVVPDVSK;ASSAAGLTAAVVR;C[+57.0214635]DFTGALIVVPDVSK;DEEQTAESIK;DFYVAFQDLPTR;DQVAIHEAMEQQTISITK;EIESEIDSEEELINK;EIESEIDSEEELINKK;ELRDEEQTAESIK;ESEDFIVEQYK;ESEDFIVEQYKR;FNGSSEDASQETVSKPSLR;GDINVC[+57.0214635]IVGDPSTAK;GVLLMLFGGVPK;IQETQAELPR;ISNLIVLHLR;KMEEEEDESALK;LFLDFLEEFQGSDGEIK;LGFAEYC[+57.0214635]R;LTHYDHVLIELTQAGLK;LVFLAC[+57.0214635]HVAPTNPR;MEEE…		6.6593	6.64857	6.66882	6.05523	5.95248	5.94798	5.43811	5.43646	5.46399	6.63188	6.66526	6.64085	5.93453	5.78179	5.84188	5.40039	5.36585	5.32368	6.61457	6.63864	6.6315	5.98636	5.94892	6.01307	5.40743	5.56129	5.5265
sp|Q6NZC7|S23IP_MOUSE	14	AHTSTTQLQEELEK;EMASPSSESNESK;EMASPSSESNESKR;GFFNIYHPLDPVAYR;IDMESLLMC[+57.0214635]TVDDLK;LEFPSGETIVMHNPK;RLEFPSGETIVMHNPK;SAWQTLNEFAR;SIIEC[+57.0214635]VDDFR;SVYWEEEPTEVR;SVYWEEEPTEVRR;TMNISPEQPQH;VIVQFQPSSVPDEWGTTQDGQTRPR;YDVYLYDR		3.48874	3.43318	3.5963	3.68048	3.65076	3.64925	3.8734	3.91666	3.77524	3.44413	3.48884	3.58316	3.86452	3.70816	3.73738	4.34538	4.67371	4.34026	3.39361	3.47382	3.4211	3.60194	3.80365	3.65362	3.7258	3.8817	3.83908
sp|P70697|DCUP_MOUSE	8	AAQDFFSTC[+57.0214635]R;AAWGEETDYTPVWC[+57.0214635]MR;AGLAPVPMIIFAK;FALPYIR;LRDPAAAASELGYVFQAITLTR;LVQQMLDDFGPQR;SPEAC[+57.0214635]C[+57.0214635]ELTLQPLR;YIANLGHGLYPDMDPER		2.91817	3.12192	3.08521	3.32872	3.41679	3.31188	3.22285	3.30415	3.30075	3.02899	2.98402	2.91391	3.48991	3.35894	3.31276	3.09977	3.48444	2.97775	3.05656	3.20348	3.25314	3.32316	3.38874	3.35587	2.97652	3.29507	3.36118
sp|Q9CX86|ROA0_MOUSE	11	AEIIADKQSGK;AVPKEDIHAGGGGAR;EDIHAGGGGAR;GDVAEGDLIEHFSQFGAVEK;GFGFVYFQSHDAADK;GFGFVYFQSHDAADKAAVVK;GHFEAFGTLTDC[+57.0214635]VVVVNPQTK;LFIGGLNVQTSESGLR;LFVGGLKGDVAEGDLIEHFSQFGAVEK;RGFGFVYFQSHDAADK;SGGGGGGGGSWGGR		5.91268	5.94278	5.77408	5.83884	5.66727	5.46694	5.6062	5.686	5.42379	5.86426	5.91423	5.86196	5.86112	5.65216	5.36435	5.41228	5.35518	5.48335	5.97192	5.90423	5.78981	5.7263	5.64921	5.37586	5.30191	5.70706	5.57445
sp|Q8BK67|RCC2_MOUSE	22	AAGAAAIITEPEHTK;AAGAAAIITEPEHTKER;AQRIEYDC[+57.0214635]ELVPR;AVQDLC[+57.0214635]GWR;DVAC[+57.0214635]GANHTLVLDSQK;DVAC[+57.0214635]GANHTLVLDSQKR;GAAWEEPSSGNGTAR;GNLYSFGC[+57.0214635]PEYGQLGHNSDGK;GQLLIFGATNWDLIGR;GQLLIFGATNWDLIGRK;IEYDC[+57.0214635]ELVPR;LGHAEQKDEMVPR;LIEALSHEAIVLAAC[+57.0214635]GR;MAC[+57.0214635]GAEFSMLMDC[+57.0214635]K;MGQLGLGNQTDAVPSPAQIMYNGQPITK;NHTLALTDTGSVFAFGENK;NLGQNLWGP…		7.39138	7.44828	7.47409	6.00831	5.93758	5.79973	5.0654	4.91518	5.00131	7.25064	7.11943	6.86168	5.91437	5.59183	5.48461	4.49876	4.48607	4.49194	7.04029	7.10926	7.22482	5.64519	5.9066	5.65737	4.67992	5.10731	5.09441
sp|Q9CPU4|MGST3_MOUSE	4	IASGLGLAWIIGR;VEYPVMYSTDPENGHMFNC[+57.0214635]IQR;VLYAYGYYTGDPSK;VLYAYGYYTGDPSKR		-0.51118	-0.478369	-0.550294	0.530548	0.803414	0.798714	1.54803	1.47761	1.6638	-0.696772	-0.892553	-0.754391	1.16486	0.995467	0.779761	1.94246	1.52452	2.28117	-0.946391	-1.24736	-1.10641	0.575987	0.671342	-0.294904	1.77629	1.52966	1.35235
sp|Q922D8|C1TC_MOUSE	35	ASFITPVPGGVGPMTVAMLMQSTVESAQR;ASQAPSSFQLLYDLK;AYTEEDLDLVEK;AYTEEDLDLVEKGFSNLR;C[+57.0214635]THWAEGGQGALALAQAVQR;DVDGLTSVSAGK;EIGLLTEEVELYGETKAK;GDILVVATGQPEMVK;GDLNDC[+57.0214635]FIPC[+57.0214635]TPK;GEWIKPGAVVIDC[+57.0214635]GINYVPDDTKPNGR;GVPTGFVLPIR;IFHELTQTDK;ITIGQSPTEK;IVGAPMHDLLLWNNATVTTC[+57.0214635]HSK;IYGADDIELLPEAQNK;IYGADDIELLPEAQNKAEIYTK;KGEPISC[+57.0214635]EDLGVSGALTVLMK;KITIGQSPTEK;…		7.83829	7.84192	8.0117	6.99866	6.9482	6.9433	6.50769	6.44816	6.48122	7.75195	7.78288	8.00603	6.85417	6.70925	6.69272	6.21851	6.36882	6.17997	7.7268	7.86975	7.87264	6.89942	7.10656	7.12333	6.4543	6.65476	6.62406
sp|Q9Z1B5|MD2L1_MOUSE	8	DLVVPEKWEESGPQFITNC[+57.0214635]EEVR;GIYPSETFTR;LVVVISNIESGEVLER;SFTTTIHK;WEESGPQFITNC[+57.0214635]EEVR;WQFDIEC[+57.0214635]DK;YGLTLLTTTDPELIK;YLNNVVEQLKEWLYK		3.49618	3.47549	3.49437	2.66171	2.7142	2.82987	2.03455	1.95944	1.98161	3.46027	3.3131	3.26174	2.52841	2.4233	2.55927	2.20403	2.02742	2.19622	3.5275	3.50145	3.55855	2.63365	2.58263	2.89451	2.2023	1.88437	1.83723
sp|Q9Z0N1|IF2G_MOUSE	7	DSEGKLMC[+57.0214635]KPIFSK;GVTIKPTVDDD;LDDPSC[+57.0214635]PRPEC[+57.0214635]YR;LTPLSHEVISR;RGVTIKPTVDDD;SC[+57.0214635]GSSTPDEFPTDIPGTK;SC[+57.0214635]GSSTPDEFPTDIPGTKGNFK		5.2752	5.17701	5.36922	4.35463	4.22095	4.33048	3.78236	3.81745	3.84886	5.16568	5.25545	5.15059	4.56089	4.32475	4.54049	4.26805	4.36678	4.26096	5.26564	5.39511	5.39616	4.34318	4.46375	4.79912	3.93746	3.94108	3.97782
sp|O88874|CCNK_MOUSE	5	DLAHTPSQLEGLDPATEAR;FDLQVEHPYQFLLK;FEIQEWTSKPMYR;KPPLAPALGEAEATGPVETSDLPK;SLLNDVQFGQFGDDPKEEVMVLER		-0.177287	-0.01932	-0.0750026	-1.77679	-1.08143	-0.686093	-0.804457	-0.656422	-0.795748	-0.0622495	-0.14506	-0.0702256	-1.72073	-1.29384	-1.38191	-0.923176	-0.106419	-0.675576	-0.124557	0.112596	-0.107411	-1.27788	-0.428378	-1.10364	-1.4266	-0.668819	-0.786556
sp|Q8K310|MATR3_MOUSE	27	C[+57.0214635]RDDSFFGETSHNYHK;DDSFFGETSHNYHK;DLDELSRYPEDK;DLSAAGIGLLAAATQSLSMPASLGR;DSFDDRGPSLNPVLDYDHGSR;EDAMAMVDHC[+57.0214635]LK;EWSQHINGASHSR;GAPPSSNIEDFHGLLPK;GDTDQASNILASFGLSAR;GNLGAGNGNLQGPR;GPSLNPVLDYDHGSR;IEELDQENEAALENGIK;IGPYQPNVPVGIDYVIPK;ITPENLPQILLQLK;ITPENLPQILLQLKR;LC[+57.0214635]SLFYTNEEVAK;NTHC[+57.0214635]SSLPHYQK;RTEEGPTLSYGR;SFQQSSLGR;SQAFIEMETR;SQESGYYDR;TEEGPTLSYGR;TEEGPTLS…		6.27672	6.19865	6.29649	6.05126	6.01156	5.96247	5.95785	5.99624	5.84724	6.16545	6.29407	6.52505	5.96325	5.99422	6.00546	5.98981	6.03027	5.93538	6.24179	6.32103	6.25374	6.05791	6.05308	6.24916	5.81433	6.02265	6.08528
sp|O35691|PININ_MOUSE	7	DPNDVRPIQAR;EEELEETGNQHNDVEVEEAGEEEEK;FKQESTVATER;IFGLLMGTLQK;LEVQAEEER;QQDSQPEEVMDVLEMVESVK;VELAQLQEEWNEHNAK		2.50024	2.59976	2.58989	1.60576	1.44432	1.37136	1.30418	1.44007	1.48607	2.31339	2.64935	2.90289	1.46851	1.38956	1.19131	1.36769	1.68566	1.40497	2.52374	2.39482	2.46392	1.89851	1.55454	1.36225	1.28107	1.43078	1.79966
sp|Q9WV60|GSK3B_MOUSE	3	TTSFAESC[+57.0214635]KPVQQPSAFGSMK;VIGNGSFGVVYQAK;VTTVVATPGQGPDRPQEVSYTDTK		-0.0590849	-0.0211068	0.255259	0.930694	0.619279	0.636328	0.701935	0.796049	0.639713	-0.190705	-0.199567	0.146439	0.889454	0.801466	0.962259	0.809407	0.90396	0.597583	-0.122097	-0.0453414	-0.11066	0.603116	0.773924	1.07713	0.65693	0.824489	0.789274
sp|Q5SUQ9-2|CTC1_MOUSE;sp|Q5SUQ9|CTC1_MOUSE	9	ALGLSPSEWSSILEHAR;C[+57.0214635]QLGLPLYLWAAK;HAYSEILEEPHNC[+57.0214635]PLQK;LLVEDGTAEATVIC[+57.0214635]R;LPC[+57.0214635]C[+57.0214635]SHLSWSQSAYQAWTR;LQGFSC[+57.0214635]LKPLTLPSSK;TLC[+57.0214635]TSPFVLRPVK;VALQFTGLGGQTESASK;YTPLQTPYSFPTMLALAEEGQHR		0.248593	0.521139	0.650947	0.875698	1.14541	0.92823	0.870766	0.81734	1.02771	0.176001	0.217108	0.313984	0.997469	0.956347	0.968637	0.417808	0.793259	0.415443	0.0775401	0.285837	0.238788	0.659024	1.10304	0.936448	0.339995	0.899828	0.850168
sp|P37913|DNLI1_MOUSE	26	AEVAEKGDVGLVAENSR;C[+57.0214635]ADLSLSPIYPAAR;DKQPEQATTSNQVASLYR;DTEQIAEFLEQSVK;EGDQLIVPSEPTK;FEEVDFTC[+57.0214635]EYK;FEEVDFTC[+57.0214635]EYKYDGQR;GDVGLVAENSR;IDGAVAPDHWLDPSIVWEVK;IIPVLLEHGLER;LGPPQQGLELGVGDGVLLK;LKPQEEEQSKPPAR;LSPGVPLKPMLAHPTR;MVETLSNLLR;MWLEEQGMILK;NNYHPIEDAC[+57.0214635]WK;NQEDNTGKYPDIISR;QIQPFQVLTTR;QPEQATTSNQVASLYR;QTFC[+57.0214635]EVPDLDR;SIMSFFQPTK;TENIPVC[+57.0214635]K;…		5.32729	5.23882	5.39505	4.63043	4.65345	4.51641	3.66797	3.61186	3.7773	5.2079	5.2112	5.35705	4.50116	4.51583	4.65312	3.94097	3.87203	3.84899	5.10828	5.17529	5.21462	4.46595	4.56831	4.73841	3.72795	3.7725	3.5719
sp|Q5SSZ5|TENS3_MOUSE	11	AELDQLLSGFGLEDSASSHK;ALSMTLVQEPPPVSTVVHFK;AQESWLNNDPQHVVVIHC[+57.0214635]R;ETVITAYPSDLNMIDGR;IIAVSFPASC[+57.0214635]SEESYLHSLQEVTR;IMDVGWPELHAPPLDK;QGAAC[+57.0214635]NVWYLNSVEMESLTGHQAVQK;QQQMVAAHQYSFASDGEAR;VSAQGITLTDNQR;YPPFSPPEPQLSSPASLHK;YVQFLSGLLSGAMK		2.35211	2.37817	2.43985	0.63494	0.607885	0.49174	0.690785	0.754988	0.690349	2.4231	2.43146	2.37436	0.720903	0.421915	0.305061	0.340722	0.457209	0.485047	2.6073	2.69912	2.63758	0.731279	0.847093	0.269031	0.790444	0.971046	0.91356
sp|Q8CAY6|THIC_MOUSE	8	AGHFDKEIVPVLVSSR;EIVPVLVSSR;HGSNLEAMGK;ILVTLLHTLER;IVSWSQAGVEPSVMGVGPIPAIK;TAIGSFNGALSTVPVHEMGTTVIK;VAPEEVSEVIFGHVLTAGC[+57.0214635]GQNPTR;VNIDGGAIALGHPLGASGC[+57.0214635]R		4.05302	4.12222	4.14212	4.38952	4.25493	4.184	3.58179	3.89664	3.71891	4.1217	4.21471	4.2467	4.3707	4.36303	4.30367	3.52235	3.55292	3.54288	4.22909	4.13758	4.09971	4.18668	4.29398	4.48201	3.29991	3.68952	3.73495
sp|Q8BU04|UBR7_MOUSE	7	C[+57.0214635]SYSQGSVGR;EDIQQFFEEFQSK;LC[+57.0214635]TC[+57.0214635]QDC[+57.0214635]MK;NEPC[+57.0214635]SSSSSESDLQTVFK;NEPC[+57.0214635]SSSSSESDLQTVFKK;VQQVELIC[+57.0214635]EYNDLK;YNDNFFGLYC[+57.0214635]VC[+57.0214635]K		2.50231	2.28022	2.37862	0.286422	0.231644	-0.0834292	-0.397666	-0.685512	-0.278222	2.27612	1.82181	1.37134	0.0457945	0.0582991	0.173779	-0.819692	-1.68264	-1.05511	1.88921	1.8516	2.194	-0.160698	0.233102	0.370451	-0.702203	-0.525377	-0.947494
sp|Q8BXN9-2|TM87A_MOUSE;sp|Q8BXN9|TM87A_MOUSE	4	ADEIESYLENLK;FAFSPLSEEDEEDEQKEPMLK;GESVQNALVLAELLSAVK;SADC[+57.0214635]YNEIYNFK		0.339463	0.0962982	0.387915	1.06032	0.963172	0.852943	1.30459	1.30756	1.26923	0.411286	0.402293	0.513891	1.34258	1.25909	1.56495	1.66328	1.78931	1.75812	0.298273	0.505863	0.370888	1.03281	1.15377	1.5941	1.24271	1.16624	0.937364
sp|P35123|UBP4_MOUSE	12	ALNMSEFVC[+57.0214635]DR;FDLWSLPK;GEIAEAYAELIK;IFQMDEGLSHITPR;IMEVFLVPADPQC[+57.0214635]RPIQYR;LLNWYGC[+57.0214635]VEGQQPIVR;LRNDSVIVDTFHGLFK;LSGIAAENMVVTDVYNHR;SLYFDEQESEAC[+57.0214635]EK;STLAIDWDSETR;VSVTFDPFC[+57.0214635]YLTLPLPLKK;YMSNTYEQLSK		2.20337	2.25583	2.19751	2.26341	2.44668	2.1758	2.17413	2.07398	2.11154	2.23724	1.99157	1.84959	2.28415	2.15235	2.147	1.86955	1.75863	1.73689	2.03492	2.13129	2.25363	1.87067	2.32841	2.19122	1.7898	1.83644	1.84209
sp|Q8CGC7|SYEP_MOUSE	62	AALLNQHYQVNFK;AIQGATSHHLGQNFSK;ASKDQVDSAVQELLQLK;AYVDDTPAEQMK;AYVDDTPAEQMKAER;DEQFYWIIEALGIR;DQDVEPGAPSMGAK;DQVDSAVQELLQLK;DSKHEELMLGDPC[+57.0214635]LK;EAPC[+57.0214635]ILIYIPDGHTK;EENLAEWYSQVITK;ERPAPAVSSTC[+57.0214635]ATAEDSSVLYSR;EVVPVNVLDAQEEMK;EVVPVNVLDAQEEMKEVAR;FAGGDYTTTIEAFISASGR;FVELPGAEMGK;GDVSISVEEGKENLLR;GFFIC[+57.0214635]DQPYEPVSPYSC[+57.0214635]R;GMTVEGLKQFIAAQGSSR;GSQFGQSC[+57.0214…		7.7087	7.71567	7.79349	6.86831	6.85364	6.71792	6.60479	6.495	6.56244	7.63563	7.60664	7.67031	6.94897	6.7753	6.81415	6.80099	6.87996	6.74216	7.54219	7.65192	7.67134	6.71378	6.87634	6.92816	6.48413	6.53858	6.58238
sp|Q9ERD7|TBB3_MOUSE	6	EVDEQMLAIQSK;ISVYYNEASSHK;LATPTYGDLNHLVSATMSGVTTSLR;MSSTFIGNSTAIQELFK;MSSTFIGNSTAIQELFKR;SGAFGHLFRPDNFIFGQSGAGNNWAK		5.81622	5.76852	5.84361	5.62771	5.41661	5.43788	5.52599	5.49836	5.57192	5.92318	5.7156	5.80525	5.42824	5.28664	4.62922	5.18145	4.28323	5.2709	5.80484	5.9162	5.7253	5.42566	5.25544	4.57226	5.23267	5.47299	5.72369
sp|P14148|RL7_MOUSE	16	AGNFYVPAEPK;EANNFLWPFK;EANNFLWPFKLSSPR;FGIIC[+57.0214635]MEDLIHEIYTVGK;FGIIC[+57.0214635]MEDLIHEIYTVGKR;IALTDNSLIAR;IVEPYIAWGYPNLK;KAGNFYVPAEPK;KVATVPGTLK;KVPAVPETLK;QIFNGTFVK;SVNELIYKR;TTHFVEGGDAGNR;TTHFVEGGDAGNREDQINR;VATVPGTLKK;VPAVPETLKK		7.83438	7.80708	7.7761	7.00293	7.2822	7.22599	6.86671	6.9693	6.96467	7.85304	8.06628	8.28185	6.94178	7.1316	7.24137	7.02155	7.16913	7.11919	8.02343	7.90336	7.88895	7.27837	7.15462	7.33287	6.80486	7.01177	7.11846
sp|Q921M3|SF3B3_MOUSE	37	AEVIMNYHVGETVLSLQK;AGNGQWASVIR;ATGISFAIHGNFSGTK;AVMISAIEK;DYIVVGSDSGR;ELAAEMAAAFLNENLPESIFGAPK;FGNIC[+57.0214635]VVR;FLAVGLVDNTVR;FSNTGEDWYVLVGVAK;FVIHPESNNLIIIETDHNAYTEATK;GMIFVC[+57.0214635]SATHK;HGLEVSEMAVSELPGNPNAVWTVR;HIANYISGIQTIGHR;ILELLRPDPNTGK;ITLETDEDMVTEIR;IVPGQFLAVDPK;KQQMAEEMVEAAGEDER;LGAVFNQVAFPLQYTPR;LPPNTNDEVDEDPTGNK;LVNNGEKLEFLHK;MFLYNLTLQR;MQGQEAVLAMSSR;NENQLIIFADDTYPR;NFGDQPDIR…		7.19667	7.20568	7.33107	6.77711	6.81886	6.83843	6.43846	6.48596	6.38073	7.1803	7.18287	7.28635	6.87515	6.65119	6.66059	6.40038	6.56529	6.48526	7.04396	7.14833	7.15711	6.68049	6.84471	6.7663	6.15722	6.41872	6.41426
sp|A2ARV4|LRP2_MOUSE	46	AC[+57.0214635]STGEFSC[+57.0214635]ANGR;AYLPDFESGSNNPVR;C[+57.0214635]AADGSPPLLLLPENVR;C[+57.0214635]AC[+57.0214635]DPEYTLESDGR;C[+57.0214635]ADGSSC[+57.0214635]INSR;C[+57.0214635]ADQQC[+57.0214635]IPSR;C[+57.0214635]DHVSDC[+57.0214635]PDGSDER;C[+57.0214635]EANEWQC[+57.0214635]ANK;C[+57.0214635]GC[+57.0214635]AFGTLEDDGKNC[+57.0214635]ATSR;C[+57.0214635]NQFQFTC[+57.0214635]LNGR;C[+57.0214635]QTTNI…		2.9851	2.84526	3.15319	4.31915	4.14883	4.18202	3.09224	2.94915	3.17251	3.51023	3.39505	3.58652	5.04017	4.82391	4.95385	4.44551	4.50145	4.30996	3.33584	3.38557	3.46124	4.51101	4.62485	4.66693	3.77805	3.50158	3.28439
sp|Q91WK5|GCSH_MOUSE	3	MTLSDPSEMDELMSEEAYEK;MTLSDPSEMDELMSEEAYEKYVK;SC[+57.0214635]YEDGWLIK		1.27741	1.05899	0.806207	1.37121	1.09828	0.996487	1.67045	1.47459	1.66688	1.20977	0.958525	0.360412	1.85783	1.37696	1.83203	2.5844	2.66224	2.21691	1.21131	1.07646	0.875299	1.2878	1.22439	1.69386	1.93085	1.34374	1.28296
sp|Q9ESX5|DKC1_MOUSE	13	ALETLTGALFQRPPLIAAVK;DSAVNAIC[+57.0214635]YGAK;HGKPTDNTPATWK;KPLQEDDVAEIQHAEEFLIKPESK;LGIFWVSC[+57.0214635]EAGTYIR;LHNAIEGGTQLSR;QDYIDYSDSGK;SQQSAGKEYVGIVR;TAHYTPLPC[+57.0214635]GSNPLKR;TGFINLDKPSNPSSHEVVAWIR;TVLESGGETGDGDNDTTK;TVLESGGETGDGDNDTTKK;VAQLDTSQWPLLLK		4.49763	4.39086	4.69135	3.12942	3.31078	3.07097	2.48567	2.4644	2.66914	4.38496	4.26189	4.6337	3.04174	3.17951	3.31874	2.12967	1.9444	2.02489	4.379	4.35525	4.44993	3.03249	3.2045	3.36757	2.28763	2.42787	2.6037
sp|O88531|PPT1_MOUSE	6	C[+57.0214635]PGESSHIC[+57.0214635]DFIR;EIPGIYVLSLEIGK;ETIPLQESTLYTEDR;EWFTAHIIPFLK;LQQGYNAIGFSQGGQFLR;LVQAQYWHDPIKESVYR		-1.24403	-1.15301	-1.00374	1.03968	0.662594	0.717812	2.56433	2.38065	2.21654	-1.09677	-0.920105	-0.735018	0.616796	0.559556	0.735096	1.78629	1.57701	1.45625	-1.03015	-0.953814	-1.25458	0.965184	0.765332	0.974617	2.22704	2.30719	2.59552
sp|Q61881|MCM7_MOUSE	33	AGILTTLNAR;ALLLLLVGGVDQSPQGMK;C[+57.0214635]SILAAANPAYGR;DVLDVYIEHR;EVVNKDVLDVYIEHR;FDLLWLIQDRPDR;FLQEFYYENELGK;FLQEFYYENELGKK;GNIHIC[+57.0214635]LMGDPGVAK;GSSGVGLTAAVLR;IAQPGDHVSVTGIFLPVLR;IQEHSDQVPVGNIPR;KFLQEFYYENELGK;LAASIAPEIYGHEDVK;LAASIAPEIYGHEDVKK;LAQHITYVHQHSR;LFGDVVQELLPEYK;LFGDVVQELLPEYKEK;MVDIVEKEDVNEAIR;NPQNQYPSELMR;QIAEEDFYEK;QPPAQFEPLDMK;SDDDVSGAGELSSEELK;SDDDVSGAGELSSEELKQIAEEDFYE…		7.36056	7.37014	7.44018	6.90374	6.74826	6.79062	6.3738	6.30812	6.3202	7.35711	7.34554	7.46732	6.85303	6.59013	6.55096	6.23826	6.38222	6.2646	7.30718	7.37309	7.34327	6.84262	6.85913	6.79301	6.32396	6.5336	6.47517
sp|Q9QZ88|VPS29_MOUSE	1	MLVLVLGDLHIPHR		-2.03944	-1.85352	-1.61327	0.340772	-2.40484	0.398428	-2.25738	-4.61427	-2.97643	-1.09154	-2.25188	-1.67423	0.0501619	-2.53607	-4.73466	-1.0458	-1.7955	-0.258614	-1.92722	-2.84359	-3.97331	0.275326	-1.88606	-5.49547	-3.64555	-0.451775	-0.318111
sp|Q00915|RET1_MOUSE	10	C[+57.0214635]MTTVSWDGDK;C[+57.0214635]MTTVSWDGDKLQC[+57.0214635]VQK;EFEEDLTGIDDR;EIVQDGDHMIIR;GWTQWIEGDELHLEMR;IANLLKPDK;IANLLKPDKEIVQDGDHMIIR;MLSNENFEEYLR;NYIMDFQVGK;NYIMDFQVGKEFEEDLTGIDDR		-0.166999	-0.512895	-0.375301	5.00132	4.6491	4.60393	5.14227	5.16063	5.14163	-0.486782	-0.250009	-0.434875	4.37182	4.21628	4.26631	4.22699	3.53858	4.14039	-0.449309	-0.294434	-0.0356216	4.6728	4.19477	4.52449	4.76235	4.9073	5.05812
sp|O70400|PDLI1_MOUSE	13	C[+57.0214635]GTGIVGVFVK;DFEQPLAISR;GC[+57.0214635]ADNMTLTVSR;GHFFVEDQIYC[+57.0214635]EK;HPEC[+57.0214635]YVC[+57.0214635]TDC[+57.0214635]GINLK;LVGGKDFEQPLAISR;MNLASEPQEVLHIGSAHNR;QSTSFLVLQEILESDGK;QSTSFLVLQEILESDGKGDPNKPSGFR;SAMPFTASPAPSTR;TSASGEEANSRPVVQPHPSGSLIIDK;VAASVGNAQK;VAASVGNAQKLPIC[+57.0214635]DK		3.94601	3.65241	3.80631	4.08094	3.93998	3.85542	4.18917	4.1128	4.15265	3.66849	3.68072	3.86298	4.05891	3.91035	3.99623	4.89545	5.13696	4.72043	3.59151	3.62683	3.58092	3.85306	3.90188	4.05181	4.41861	4.0874	3.93371
sp|P47753|CAZA1_MOUSE	9	AYVKDHYSNGFC[+57.0214635]TVYAK;DHYSNGFC[+57.0214635]TVYAK;DVQDSVTVSNEVQTTK;EASDPQPEDVDGGLK;EASDPQPEDVDGGLKSWR;FITHAPPGEFNEVFNDVR;FTITPPSAQVVGVLK;IEGYDDQVLITEHGDLGNSR;TIDGQQTIIAC[+57.0214635]IESHQFQPK		3.84331	3.78064	3.91538	4.04477	4.02889	4.00863	4.05042	4.09956	3.99298	3.79839	3.838	4.07515	4.10337	4.0864	4.21485	4.40587	4.54268	4.41971	3.96894	3.99953	4.07814	3.90046	3.98195	4.23808	4.01136	4.03566	4.07579
sp|P97473|TRBP2_MOUSE	2	DGNEAEPDDDHFSIGVSSR;VTVGDTSC[+57.0214635]TGQGPSK		-3.24546	-3.49957	-3.29824	-4.29597	-4.83996	-4.41781	-4.54765	-4.42517	-4.4661	-3.22621	-3.07908	-2.76114	-4.46767	-4.5096	-4.78641	-4.52012	-5.54711	-4.57583	-3.01212	-2.88558	-2.94273	-4.43489	-4.6144	-4.24745	-4.55245	-4.76209	-4.64903
sp|P09242|PPBT_MOUSE	17	ANEGTVGVSAATER;DIAYQLMHNIK;DIAYQLMHNIKDIDVIMGGGR;DIDVIMGGGR;DTLTVVTADHSHVFTFGGYTPR;GFFLLVEGGR;GNSIFGLAPMVSDTDK;GQLHHNTGEETR;HETHGGEDVAVFAK;LDGLDLISIWK;LEMDKFPFVALSK;NVIMFLGDGMGVSTVTAAR;QALHEAVEMDQAIGK;TDVEYELDEK;TELLALDPSR;TYNTNAQVPDSAGTATAYLC[+57.0214635]GVK;VNHATPSAAYAHSADR		3.58061	3.48296	3.50491	5.38614	5.04183	5.07643	4.29104	4.39703	4.22269	3.80143	3.83984	4.02947	5.0693	4.86825	4.94373	3.64974	3.35502	3.77211	4.07644	3.93885	3.78756	5.62945	5.39109	5.69864	4.69869	4.66847	4.52432
sp|Q9DC61|MPPA_MOUSE	12	DTTMYAVSADSK;FC[+57.0214635]PVENIAK;FDSKDEILLTLEK;FGQFC[+57.0214635]TVGILINSGSR;GKPAVAALGDLTDLPTYEHIQAALSSR;GLDTVVDLLADVVLHPR;HGGIC[+57.0214635]DC[+57.0214635]QTSR;LTDEEIEMTR;LYLNVLNR;SVAQYTGGIIK;TVDLVELER;YLVGAEPAWGAPGTVDVDR		3.37906	3.40155	3.38249	3.74189	3.92603	3.96377	3.69497	3.67334	3.68882	3.43216	3.42448	3.35246	3.84558	3.8022	3.80669	3.9951	4.18594	4.02702	3.18288	3.53834	3.45957	3.76884	4.02604	3.87721	3.69298	3.74039	3.68698
sp|P38647|GRP75_MOUSE	38	AKC[+57.0214635]ELSSSVQTDINLPYLTMDASGPK;ALLAGKDSETGENIR;AMQDAEVSKSDIGEVILVGGMTR;AQFEGIVTDLIK;AQFEGIVTDLIKR;ASNGDAWVEAHGK;C[+57.0214635]ELSSSVQTDINLPYLTMDASGPK;DAGQISGLNVLR;DDIENMVK;DSETGENIR;EQQIVIQSSGGLSK;EQQIVIQSSGGLSKDDIENMVK;ERVEAVNMAEGIIHDTETK;ETAENYLGHTAK;ETGVDLTKDNMALQR;GAVVGIDLGTTNSC[+57.0214635]VAVMEGK;KSQVFSTAADGQTQVEIK;LLGQFTLIGIPPAPR;LYSPSQIGAFVLMK;MEEFKDQLPADEC[+57.0214635]NK;MKETAEN…		8.6355	8.65218	8.7197	7.99228	7.89064	7.89059	7.57893	7.57523	7.4771	8.68121	8.73034	8.9608	8.10911	7.91731	7.97689	7.83074	8.18038	7.84175	8.84436	8.9208	8.83942	8.09175	8.22205	8.39863	7.51802	7.71832	7.57724
sp|Q9DBR7|MYPT1_MOUSE	17	AQLHDTNMELTDLK;DYDGWTPLHAAAHWGK;ETQTDSVSR;ILVDNLC[+57.0214635]DMETVNK;LKDENGALIR;LYEQILAENEK;NSSINEGSTYHR;QWLNSGHISDVR;SASYSYLEDR;SGGTALHVAAAK;SPLIESTANMENNQPQK;STQGVTLTDLQEAEK;STQGVTLTDLQEAEKTIGR;SYLTPVRDEESESQR;TYDETYTR;VGQTAFDVADEDILGYLEELQKK;YDSSSTSSSDRYDSLLGR		2.58927	2.49608	2.54641	3.04899	2.82304	2.8543	2.6903	2.69472	2.64233	2.63127	2.65219	2.85844	3.03502	2.79927	2.94545	3.11534	3.31881	2.92854	2.72427	2.76641	2.62161	2.86769	2.75393	3.12599	2.64923	2.48948	2.51965
sp|Q9D0K2|SCOT1_MOUSE	5	AGGAGVPAFYTSTGYGTLVQEGGSPIKYNK;DGSVAIASKPR;GMGGAMDLVSSSK;MISSYVGENAEFER;NGLTLIELWEGLTVDDIKK		1.48153	1.50603	1.52098	1.30846	1.2763	1.25505	0.936956	0.822517	0.736457	1.46869	1.55591	1.67028	1.50981	1.29726	1.33855	1.22504	1.51733	1.29247	1.58402	1.80208	1.71333	1.49297	1.60734	1.57312	1.06907	1.14175	1.18323
sp|Q7TN75|PEG10_MOUSE	13	ALVMPPNSQTDPTEPVGGAR;APQSGTIQNQYLR;DAAAKPDPSPR;DGLMTPTVAPNGAQVLQVK;EILSFDVTQSPFFPIVLGIR;HVFEDPQR;IIVVPVVITWSQNTNR;LQVTYNC[+57.0214635]R;MNLC[+57.0214635]LYC[+57.0214635]GNGGHFADTC[+57.0214635]PAK;SIVFNSDYC[+57.0214635]R;SPGVPDAEDDDER;VC[+57.0214635]FVTSMLIGR;WLSTHDPHITWSTR		2.16289	2.20403	2.34355	4.00013	4.28512	4.02176	4.0321	3.73581	3.99165	2.29819	2.27164	1.88415	3.87723	3.54155	3.53168	3.60521	3.43268	3.29815	2.36024	2.01744	2.36194	4.09916	4.2989	3.99295	3.93964	4.13264	4.07956
sp|Q8BMJ2|SYLC_MOUSE	47	ANGHLLLNSEK;C[+57.0214635]EFAVGYQR;DGQPC[+57.0214635]MDHDR;DVWDYVFFK;DVWDYVFFKDAPFPK;EDKGTGVVTSVPSDSPDDLAALR;EEC[+57.0214635]C[+57.0214635]PGKPLNVFR;ELATEGMHR;ELMGEEILGASLSAPLTC[+57.0214635]YK;EMLASC[+57.0214635]SSLR;FASEAEDKVR;FDDPLLGPR;FSEAEHWLDYFPPLAVQDLK;GFYDGVMLVDGFK;GFYDGVMLVDGFKGQK;GTGVVTSVPSDSPDDLAALR;KNFEASLDWLQEHAC[+57.0214635]SR;LHLGHTFSLSK;LYTWVEWVK;NFEASLDWLQEHAC[+57.0214635]SR;NMETF…		7.21403	7.22999	7.3142	6.18851	6.16651	6.12588	5.71147	5.70324	5.74584	7.0954	7.12872	7.23372	6.12433	5.93535	6.01107	5.83074	5.92825	5.91806	7.06926	7.19823	7.15032	6.08102	6.12521	6.17423	5.71392	5.74423	5.73197
sp|Q8BP47|SYNC_MOUSE	20	EGIDPAPYYWYTDQR;EGIDPAPYYWYTDQRK;EPFPTIYVDSQK;EPFPTIYVDSQKENER;FLSWILNR;GYC[+57.0214635]EVTTPTLVQTQVEGGATLFK;HLAEFTHVEAEC[+57.0214635]PFLTFEDLLNR;IIIKNDPSLPEPAC[+57.0214635]VK;KYGTC[+57.0214635]PHGGYGLGLER;LEDLVC[+57.0214635]DVVDR;LMTDTINEPILLC[+57.0214635]R;LMTDTINEPILLC[+57.0214635]RFPVEIK;LTESVDVLMPNVGEIVGGSMR;MNYSDAIEWLK;NDPSLPEPAC[+57.0214635]VK;NLMFLVLR;SPVASIVYELNPNFKPPK;SWDSEEILEGYK;SWDSE…		7.11945	7.13585	7.14298	5.8426	5.97695	5.89814	5.51635	5.40787	5.46185	7.06518	6.97202	6.85715	6.06102	5.79096	5.71575	5.83596	5.90399	5.90171	6.85221	6.89081	6.90767	5.69886	5.93184	5.60308	5.42358	5.47465	5.38682
sp|Q76MZ3|2AAA_MOUSE	16	AISHEHSPSDLEAHFVPLVK;DNTIEHLLPLFLAQLK;DNTIEHLLPLFLAQLKDEC[+57.0214635]PEVR;EFC[+57.0214635]ENLSADC[+57.0214635]R;ELVSDANQHVK;ENVIMTQILPC[+57.0214635]IK;EWAHATIIPK;IGPILDNSTLQSEVKPILEK;LAGGDWFTSR;LTQDQDVDVK;MAGDPVANVR;NLC[+57.0214635]SDDTPMVR;SALASVIMGLSPILGK;TDLVPAFQNLMK;TDLVPAFQNLMKDC[+57.0214635]EAEVR;VLAMSGDPNYLHR		5.48972	5.50119	5.53552	5.34982	5.35727	5.47643	5.23214	5.49505	5.42131	5.48032	5.54885	5.70418	5.09012	5.2644	5.60523	5.50946	5.38059	5.49451	5.815	5.6726	5.77633	5.53944	5.19005	5.49744	5.44879	5.30508	5.35841
sp|Q8CFQ3|AQR_MOUSE	25	AGMQPGLTMVVGPPGTGK;ASLC[+57.0214635]NLYNWR;FFGPLSSNTLHQVASYLC[+57.0214635]LLPTLPK;FQGQQNDYILLSLVR;GC[+57.0214635]EIQGMLDDK;GC[+57.0214635]EIQGMLDDKGR;IMALDIDER;IVAPTVSQINAEFVTQLAC[+57.0214635]K;LGHGEEELETEK;LGHGEEELETEKDFSR;LGLYIFAR;LNLQFLTLHDYLLR;MAQPIVAFTVVEVAKPNIGENWPTR;MKPWQSEYGGVVFGGWAR;MPNQIATLDFNDTFLSIEHLK;NEDTTFDKEFLLELLVSR;NTIQFTHTQIEAIR;QDIEDSVSR;RNTIQFTHTQIEAIR;SYEEDMEIAEGC[+57.0214635…		3.08515	3.38187	3.34651	2.88946	2.85034	2.87534	2.47685	2.26716	2.55953	3.2426	3.08	3.06081	2.92458	2.62422	2.40305	2.38667	2.40207	2.31289	3.05529	3.1843	3.13057	2.90952	2.92608	2.25614	2.26514	2.5555	2.61044
sp|Q5U4D9|THOC6_MOUSE	7	ENSLILAGGDC[+57.0214635]QLHSMDLETGAFTR;GHTDYIHC[+57.0214635]LALR;GWLWAEILK;HLLSAGDGEVK;SPEVLSGGEDGAVR;TSLEVPEINALLLVPK;VLTASGNSC[+57.0214635]R		2.2919	2.29794	2.28624	1.92416	1.8911	1.87555	1.92221	1.82548	1.8421	2.25303	2.1681	2.03865	2.04812	1.9152	1.78036	1.78533	1.7438	1.8934	2.24917	2.27066	2.22623	1.9385	2.00316	2.02792	1.79007	1.87021	1.99328
sp|Q62351|TFR1_MOUSE	22	AFTYINLDK;DESLAYYIENQFHEFK;EAGSQKDESLAYYIENQFHEFK;GYEEPDRYVVVGAQR;HIFWGSGSHTLSALVENLK;ILNIFGVIK;LAADEEENADNNMK;LAETEETDKSETMETEDVPTSSR;LAQVFSDMISK;LDTYEALTQK;LELSQNQNVK;LNSIEFADTIK;LTHDVELNLDYEMYNSK;QVDGDNSHVEMK;SAFSNLFGGEPLSYTR;SSVGTGLLLK;TAAEVAGQLIIK;TLLSEKLNSIEFADTIK;VANAQSFNAIGVLIYMDK;VEYHFLSPYVSPR;VSASPLLYTLMGK;VVLGTSNFK		5.51037	5.65571	5.59781	3.62524	3.67964	3.72301	3.72486	3.92771	3.74312	5.51556	5.49505	5.77812	3.61563	3.38821	3.35947	3.74433	3.85103	3.63821	5.64408	5.72114	5.6685	3.75825	3.76443	3.92964	3.41993	3.71076	3.68421
sp|P68040|RACK1_MOUSE	18	DETNYGIPQR;DGQAMLWDLNEGK;DKTIIMWK;DVLSVAFSSDNR;FSPNSSNPIIVSC[+57.0214635]GWDK;FSPNSSNPIIVSC[+57.0214635]GWDKLVK;GHNGWVTQIATTPQFPDMILSASR;HLYTLDGGDIINALC[+57.0214635]FSPNR;IIVDELKQEVISTSSK;LTRDETNYGIPQR;LWDLTTGTTTR;LWDLTTGTTTRR;LWNTLGVC[+57.0214635]K;QEVISTSSK;TNHIGHTGYLNTVTVSPDGSLC[+57.0214635]ASGGK;VWQVTIGTR;YTVQDESHSEWVSC[+57.0214635]VR;YWLC[+57.0214635]AATGPSIK		9.65777	9.62694	9.68688	8.80721	8.80093	8.65876	8.46093	8.41551	8.45144	9.64208	9.53733	9.4314	8.95666	8.66363	8.73832	8.52584	8.42563	8.47495	9.60453	9.64773	9.70309	8.71134	8.92175	8.85997	8.42063	8.51267	8.41892
sp|Q99KN2|CIAO1_MOUSE	6	C[+57.0214635]IC[+57.0214635]TLSGFHTR;HVVWHPSQELLASASYDDTVK;IWGTEGDSWIC[+57.0214635]K;NQDDFEC[+57.0214635]VTTLEGHENEVK;SVAWAPSGNLLATC[+57.0214635]SR;VFEEDPGSDPQQPTFSLTAHLR		2.02681	1.95384	1.95189	1.3191	1.66303	1.29049	1.63537	1.3435	1.67026	1.88835	1.48737	1.01279	1.84983	1.70776	1.81864	1.76322	1.7112	1.49311	1.34634	1.59509	1.85456	1.05903	1.98526	1.57288	1.33575	1.30498	1.14576
sp|P17809|GTR1_MOUSE	6	DLQEMKEEGR;KVTILELFR;QGGASQSDKTPEELFHPLGADSQV;SFEMLILGR;TFDEIASGFR;TPEELFHPLGADSQV		3.71462	3.76307	3.68473	4.17803	4.20368	4.21081	3.11583	3.06945	3.20834	3.86075	3.80717	3.84011	3.88405	3.48786	3.55461	2.9931	3.50628	2.62238	3.31142	3.51901	3.42678	4.31867	4.40971	4.35618	3.36418	3.43958	2.98224
sp|P19096|FAS_MOUSE	85	AAMLGQEDPPQHGLPR;AC[+57.0214635]VDTALENLSTLK;AGLYGLPK;AIPQEKPIFLSVEDTSFQWVDSLK;ALIAEATK;C[+57.0214635]ILLSNLSNTSHAPK;DAMLENQTPELFQDVNKPK;DC[+57.0214635]MLGMEFSGR;DC[+57.0214635]MLGMEFSGRDR;DGAWGAFR;DNLEFFLTNLGK;DPETLLGYSMVGC[+57.0214635]QR;DTSFEQHVLLHTGGK;EAC[+57.0214635]PELDYFVAFSSVSC[+57.0214635]GR;EDTQVADVTTSR;EEEPEAVLPGAQPTLISAISK;EGGFLLVHTVLK;EHDLVLPMR;ELSFAAVSFYHK;EQTAHAFVNVLTR;FDASFFGVHPK;…		8.31615	8.39548	8.4511	8.51582	8.45049	8.45453	7.42788	7.47762	7.39437	8.42277	8.47914	8.56899	8.51101	8.24822	8.16703	7.51165	7.72186	7.50167	8.52335	8.6266	8.57047	8.35816	8.46899	8.42784	7.14519	7.37736	7.39519
sp|Q3UQ28|PXDN_MOUSE	28	AEGNPKPEIIWLR;ANEQLGLTSMHTLWFR;AVYENGFNTPR;DHGIPPYHDYR;DPYTVGQAR;EQINQLTSYIDASNVYGSTDHEAR;GHPQPVIAWTK;GQFNAFSYHFR;IPSQLLNTELTER;ISGVALHDQGQYEC[+57.0214635]QAVNIIGSQK;ITHLVPGTFSQLESMK;IVGAEIQHITYR;IVNEGGIDPLLR;KIVGAEIQHITYR;LDENFEPIPQGHVPLHK;LGPTLMC[+57.0214635]LLSTQFR;LNPHWDGDTVYHETR;LSTTEC[+57.0214635]VDDSGESHGGNTK;LWYENPGVFSPAQLTQLK;NGDPYVATSIVEAIATVDR;NVAGEAKTQEVTLR;SLEFSYEDDKPTKR;SLNTLLLNNNQI…		0.165103	0.905202	0.0536045	2.7149	2.72146	2.54747	5.02574	5.15643	4.95507	0.416124	0.451108	-0.201487	3.17267	2.96629	3.18106	5.72798	6.01951	5.72899	0.959185	0.483828	0.634088	2.07771	2.55258	2.45651	4.60604	4.94244	5.19438
sp|Q60737|CSK21_MOUSE	18	ALDYC[+57.0214635]HSMGIMHR;DVKPHNVMIDHEHR;DVKPHNVMIDHEHRK;EAMEHPYFYTVVK;EAMEHPYFYTVVKDQAR;EPFFHGHDNYDQLVR;EYWDYESHVVEWGNQDDYQLVR;FVHSENQHLVSPEALDFLDK;FYMYEILK;GGPNIITLADIVK;GGPNIITLADIVKDPVSR;GKYSEVFEAINITNNEK;KEPFFHGHDNYDQLVR;LIDWGLAEFYHPGQEYNVR;QLYQTLTDYDIR;TPALVFEHVNNTDFK;VLGTEDLYDYIDKYNIELDPR;YSEVFEAINITNNEK		5.25807	5.3828	5.49536	4.54496	4.53508	4.56351	4.07147	4.18566	4.16962	5.27783	5.3416	5.54208	4.54459	4.44313	4.24399	4.05082	4.22319	4.1746	5.26745	5.27772	5.29429	4.70278	4.55428	4.14652	4.03105	4.28922	4.3648
sp|P35846|FOLR1_MOUSE	6	C[+57.0214635]IQMWFDPAQGNPNEEVAR;EKPGPEDNLHDQC[+57.0214635]SPWK;FNWNHC[+57.0214635]GTMTSEC[+57.0214635]K;FNWNHC[+57.0214635]GTMTSEC[+57.0214635]KR;ILDVPLC[+57.0214635]K;TELLNVC[+57.0214635]MDAK		1.04088	0.825553	0.629128	1.45865	1.29737	1.29102	1.02985	1.23465	1.15731	1.23018	1.32179	0.581828	1.81104	1.73273	1.95691	1.15508	0.868439	1.14143	1.55497	1.25751	1.11802	1.68266	1.67944	2.05484	1.46183	1.12888	0.752955
sp|P61202|CSN2_MOUSE	12	AHTDFFEAFK;ALYEQSLHIK;ELNIDVADVESLLVQC[+57.0214635]ILDNTIHGR;IDQVNQLLELDHQK;NYDESGSPR;QLHQSC[+57.0214635]QTDDGEDDLKK;QMDLLQEFYETTLEALKDAK;SAIPHPLIMGVIR;SINSILDYISTSK;WTNQLNSLNQAVVSK;YLVLANMLMK;YTALDKWTNQLNSLNQAVVSK		3.06992	3.29062	3.25771	2.8691	2.79792	2.7356	2.78673	2.94999	2.94552	3.06525	3.12384	3.4855	2.8435	2.61774	2.6886	2.95373	3.10875	2.96025	3.21615	3.21031	3.14081	2.88464	2.59013	2.42449	2.57598	2.77116	2.97705
sp|Q3V0C5-5|UBP48_MOUSE	14	ALGLDTGQQQDAQEFSK;FYELELNIQGHK;GGSFVYELSAVLIHR;GVSAYSGHYIAHVK;ISEYAANIFYSR;LFMSLLEDTLSK;LLSLPC[+57.0214635]TLNLQLMR;NHTMVQVPAFLQELVDR;QALYLC[+57.0214635]PSTC[+57.0214635]SDYTK;QLTDC[+57.0214635]ISEFLKEER;SAPVSSIGNAALLC[+57.0214635]PHGGLMFTFPSLTK;TSQQGYVAYQK;WLDESTPTKPIDNNAC[+57.0214635]LC[+57.0214635]SHDK;YFC[+57.0214635]ENC[+57.0214635]QSK		2.94265	2.98185	3.02105	2.19139	2.23732	2.28929	1.71407	1.62803	1.88788	2.88088	2.82524	2.64716	2.376	2.26495	2.14811	1.83855	1.86149	1.91663	2.83746	2.93367	2.9556	2.21959	2.33252	1.99364	1.77022	1.92399	1.72892
sp|O70310|NMT1_MOUSE	13	AAYSFYNVHTQTPLLDLMSDALVLAK;AIELFSVGQGPAK;EKGSDMESTQDQPVK;FGIGDGNLQYYLYNWK;GSDMESTQDQPVK;GSDMESTQDQPVKMTSLPAER;KLVGFISAIPANIHIYDTEK;LGEVVNTHGPVEPDKDNIR;LVGFISAIPANIHIYDTEK;QEPYTLPQGFTWDALDLGDR;SGLSPANDTGAK;SYQFWDTQPVPK;TAGLRPMEK		3.94299	4.00805	3.98594	3.62763	3.46384	3.56658	3.30736	3.30741	3.18566	3.96381	3.98556	4.1723	3.73872	3.46418	3.37727	3.59565	3.81295	3.52346	3.99552	4.07828	3.8696	3.56677	3.54359	3.56301	3.09373	3.3364	3.36193
sp|P51859|HDGF_MOUSE	9	DLFPYEESK;GFSEGLWEIENNPTVK;GSAEGSSDEEGKLVIDEPAK;IDEMPEAAVK;KGFSEGLWEIENNPTVK;SC[+57.0214635]AAEPEVEPEAHEGDGDK;SC[+57.0214635]AAEPEVEPEAHEGDGDKK;STANKYQVFFFGTHETAFLGPK;YQVFFFGTHETAFLGPK		4.76748	4.61057	4.63598	4.17898	3.7745	3.90533	3.78484	3.68928	3.62179	4.65012	4.71988	4.91208	4.02298	3.76593	3.88815	4.02151	3.90962	3.99576	4.8749	4.74049	4.69947	4.13592	3.65429	4.10672	3.7507	3.59627	3.60753
sp|Q8VHL1|SETD7_MOUSE	2	IAYVYPDQR;VYVADSLISSAGEGLFSK		-1.57135	-1.45182	-1.03848	0.629624	0.642851	0.72416	0.720193	0.706684	0.637414	-1.19086	-1.14186	-0.631949	0.371586	0.427134	0.44254	1.04223	1.49174	1.13238	-1.46287	-1.36245	-1.5506	0.494394	0.644609	0.896347	0.667157	0.737979	0.809459
sp|Q99KP6|PRP19_MOUSE	14	ALQDEWDAVMLHSFTLR;ATVLTTER;FIASTGMDR;GKTVPEELVKPEELSK;IWSVPNTSC[+57.0214635]VQVVR;KVTSVVFHPSQELVFSASPDATIR;LQDKATVLTTER;QELSHALYQHDAAC[+57.0214635]R;QVASHVGLHSASIPGILALDLC[+57.0214635]PSDTNK;STEQILATLK;TLQLDNNFEVK;TVPEELVKPEELSK;VAHPIRPKPPSATSIPAILK;VTSVVFHPSQELVFSASPDATIR		6.64319	6.6832	6.78157	6.18487	6.27728	6.09323	6.04051	6.03302	6.07292	6.57097	6.58654	6.48393	6.35134	6.21385	6.30213	6.01005	6.19386	5.99482	6.47371	6.56355	6.60185	5.98511	6.31384	6.31284	5.80731	5.98717	5.98389
sp|P26043|RADI_MOUSE	4	IAQDLEMYGVNYFEIK;NQEQLAAELAEFTAK;QLQALSSELAQAR;TQNDVLHAENVK		1.02647	0.494875	0.719089	1.08229	0.739647	0.914337	0.967115	1.11157	1.13542	0.803884	1.01644	1.40406	0.483999	0.921127	1.31502	0.958724	0.2839	1.03225	1.13346	0.906884	0.670649	1.39503	0.464842	1.34752	1.31546	1.14784	1.1585
sp|P63024|VAMP3_MOUSE	2	ADALQAGASQFETSAAK;LQQTQNQVDEVVDIMR		-0.906839	-1.00128	-0.711583	0.538127	-0.0511022	0.214792	0.510144	0.332368	0.447822	-0.732116	-0.729833	-0.481156	-0.116535	0.215484	0.265285	1.05589	0.736056	0.851176	-0.133658	-0.245939	-0.688187	0.313182	-0.0832038	0.602299	1.03588	0.708697	0.441923
sp|Q924C1|XPO5_MOUSE	28	AGGFVVGYTPSGNPIFR;ALDIVESEK;ALSDIDSFIAYVGADLK;AVTVMMDPSSTQR;C[+57.0214635]ALMEALVLVSNQFK;C[+57.0214635]ALMEALVLVSNQFKDYER;DIQQTLTQNMER;DPALLAVIPK;DYPDLVLPNFDMLYSHVK;FFGILYENC[+57.0214635]YHILGK;HFGLQILEHVVK;ILEEENHIKDVLSR;ILNFLLNTLQENVNK;LAEDVVTFQTLPTQR;LFSFVTFESVGESK;LLDNLLALVR;MSFC[+57.0214635]VYSILGVMR;NPC[+57.0214635]TEQILR;NSVMELIANGTLR;QLLSNELLLTQMEK;SC[+57.0214635]DPAVEDPC[+57.0214635]GLNR…		5.31818	5.4665	5.4796	4.66261	4.73742	4.78815	4.51225	4.47281	4.50604	5.46642	5.39615	5.45626	4.56943	4.32797	4.23332	4.19186	4.12595	4.13771	5.38043	5.39879	5.42696	4.66526	4.67172	4.49058	4.41358	4.63143	4.65841
sp|Q8R050-2|ERF3A_MOUSE;sp|Q8R050|ERF3A_MOUSE	9	DIHFMPC[+57.0214635]SGLTGANLK;ENLSAAFSR;GIEEEEILPGFILC[+57.0214635]DLNNLC[+57.0214635]HSGR;HNVEVLGILSDDVETDSVAPGENLK;KDIHFMPC[+57.0214635]SGLTGANLK;MDDPTVNWSNER;STIGGQIMYLTGMVDK;STIGGQIMYLTGMVDKR;TFDAQIVIIEHK		4.7108	4.71887	4.74676	4.07323	3.93994	3.66156	3.53974	3.5676	3.54849	4.5814	4.61783	4.72274	4.10238	3.80865	3.66996	3.67087	3.67118	3.68262	4.7764	4.68527	4.65724	3.91188	3.94817	3.86475	3.51411	3.65662	3.61429
sp|O88967|YMEL1_MOUSE	5	GILLVGPPGTGK;LGVMTYSDTGK;LVEAQNIAPSFVK;NLAEALLTYETLDAK;TTTGLDSAVDPVQMK		1.79854	1.79836	1.87483	0.738803	1.47994	1.50695	1.34631	1.30947	1.18817	1.96381	1.84452	2.22001	0.752034	1.40142	1.60553	1.69621	2.11339	1.66784	1.23786	2.06202	2.09266	0.710645	1.61969	1.86992	1.21336	1.36295	1.28127
sp|O55135|IF6_MOUSE	7	ASFENNC[+57.0214635]EVGC[+57.0214635]FAK;ETEEILADVLK;HGLLVPNNTTDQELQHIR;LNEAKPSTIATSMR;LSALGNVTTC[+57.0214635]NDYVALVHPDLDR;NSLPDSVQIR;QTVADQVLVGSYC[+57.0214635]VFSNQGGLVHPK		5.73219	5.76576	5.82019	5.0532	4.98386	4.98703	4.66907	4.68226	4.65998	5.70185	5.75753	5.86296	5.06756	4.91343	5.00688	4.75939	4.92055	4.79266	5.76168	5.82607	5.90744	4.96777	5.11086	5.30745	4.58845	4.62852	4.53285
sp|D3YXK2|SAFB1_MOUSE	8	AALDDRYHSDFSR;AIEDEGGNPDEIEVTSEC[+57.0214635]NKK;AWQGTADGGMMER;C[+57.0214635]YGFVTMSTAEEATK;GLPEQLQEHAIDDK;MSSVEEDSDTKR;NFWVSGLSSTTR;SKDADDQKPGPSER		3.66809	3.56856	3.5537	3.26055	3.19062	2.82403	3.01993	3.00791	2.81522	3.56028	3.43833	3.50749	3.33278	3.2418	3.20277	2.99153	3.02536	2.73801	3.52579	3.53905	3.40412	3.07714	3.19133	3.34475	2.66746	2.80091	2.80072
sp|Q8CIN4|PAK2_MOUSE	10	DPLSANHSLKPLPSVPEEK;IISIFSGTEK;KELIINEILVMK;KNPQAVLDVLK;LLQTSNITKLEQK;MSSTIFSTGGK;MTDEEIMEK;MTDEEIMEKLR;SDNVLLGMEGSVK;SVIDPIPAPVGDSNVDSGAK		3.24073	3.12625	3.27059	3.26204	3.24874	3.38933	3.65642	3.66141	3.47396	3.15089	3.09697	3.46542	3.27501	3.33414	3.4622	4.11219	4.22335	3.98428	3.18387	3.50541	3.41771	3.36578	3.34203	3.76355	3.6537	3.59772	3.5391
sp|Q80U93|NU214_MOUSE	19	AAPGSGTSTFSFAPPSK;AC[+57.0214635]LQVGTSEEMK;DSDPVLAGIGEEIAHFQK;ETTESLHGDISTLK;LNQLVDSLQQLR;NHDSGYLHLLYK;QGSLINSFKPSGPTAASC[+57.0214635]QLSSGDK;QMASQAPAMSTLTESTLK;QNGTVVQYLPTLQEK;SLLIQNKPGDDPNK;STQTAPSSAPSTGQK;TESDDLHTFLFEIR;TLELISTEGER;TPHAVLTPVANSQAK;TTIESHTKPSPR;TVPQVVNVQELR;VGQAEDSTKPVSK;VSNDASGMVNDMK;YGMLFAGGTNGLNVFPTK		3.60522	3.52917	3.69222	3.20126	3.06192	3.12219	2.86503	2.85391	2.77449	3.56327	3.66836	3.95396	3.13374	3.02312	3.15113	3.03013	3.19644	2.93718	3.64141	3.85742	3.66341	3.29342	3.28174	3.54438	2.89646	2.93995	2.92151
sp|P14206|RSSA_MOUSE	15	ADHQPLTEASYVNLPTIALC[+57.0214635]NTDSPLR;AIVAIENPADVSVISSR;DPEEIEKEEQAAAEK;EHPWEVMPDLYFYR;EHPWEVMPDLYFYRDPEEIEK;FAAATGATPIAGR;FLAAGTHLGGTNLDFQMEQYIYK;FLAAGTHLGGTNLDFQMEQYIYKR;FTPGTFTNQIQAAFR;FTPGTFTNQIQAAFREPR;GAHSVGLMWWMLAR;KSDGIYIINLK;SDGIYIINLK;SDGIYIINLKR;YVDIAIPC[+57.0214635]NNK		8.42354	8.52092	8.53228	7.721	7.60836	7.75869	7.36216	7.32153	7.22883	8.48259	8.43906	8.48369	7.82317	7.57722	7.67885	7.59373	7.7637	7.49632	8.60688	8.66423	8.73573	7.8947	7.87815	7.87687	7.43368	7.3477	7.32725
sp|P62960|YBOX1_MOUSE	5	AADPPAENSSAPEAEQGGAE;EDGNEEDKENQGDETQGQQPPQR;GAEAANVTGPGGVPVQGSK;NEGSESAPEGQAQQR;NYQQNYQNSESGEK		4.44211	4.10476	4.13506	3.03711	3.06788	2.77847	2.76	2.9495	2.7333	4.26307	4.61885	4.77837	3.09548	3.15036	3.60398	2.91029	2.66545	2.8166	4.7077	4.52047	4.41008	3.04749	2.99942	3.53766	2.92422	2.8851	2.69882
sp|P39447|ZO1_MOUSE	26	ADGATSDDLDLHDDR;ATLLNVPDLSDSIHSANASER;AVPVSPSAVEEDEDEDGHTVVATAR;DGNIQEGDVVLK;EAGFLRPVTIFGPIADVAR;EAIQQQQNQLVWVSEGK;EEAVLFLLDLPK;EGLEEGDQILR;EISQDSLAAR;GGPAEGQLQENDR;HALLDVTPNAVDR;HEEQPAPAYEVHNR;INGTVTENMSLTDAK;IPTYEDQWSYYDDK;IVESDVGDSFYIR;LNYAQWYPIVVFLNPDSK;LPEPQKPQVKPPEDIVR;MSKPGAISTPVK;SFPDKAPVNGAEQTQK;SNHYDPEEDEEYYRK;STAMEETAIWEQHTVTLHR;SVASSQPAKPTK;VAMVNGVSMDNVEHAFAVQQLR;VVDTLYNGK;YEVSSYTDQFS…		3.63475	3.46252	3.64292	4.077	3.75062	3.80776	3.41076	3.54612	3.44804	3.52431	3.69286	3.91397	3.96271	3.80214	3.75284	3.44619	3.62978	3.38856	3.65639	3.72795	3.63803	4.09595	4.0212	4.17242	3.52037	3.58619	3.67484
sp|Q80Y84-2|KDM5B_MOUSE;sp|Q80Y84|KDM5B_MOUSE	11	C[+57.0214635]LAQEC[+57.0214635]NKPQEAFGFEQAAR;DAFHTSC[+57.0214635]VAAPSISQSSR;ETAAAMATLGEAR;ILDLFQLNK;ILNPYNLFLSGDSLR;LIDLGVGLAPYSAVEK;LVQDQVGSGLLSSR;MDFELLPDDER;QSVQPAETC[+57.0214635]PPAR;SIPVHLNSLPR;YWELQGSTLK		2.15865	2.15488	2.33704	0.637257	0.720412	1.52041	1.06566	1.14887	0.151606	2.67209	2.25271	2.43859	0.769923	1.36577	1.3966	-0.21031	1.05292	-0.461107	2.14997	2.32381	2.31854	1.44324	0.816891	1.14125	1.17018	0.978178	0.443633
sp|Q9DCL9|PUR6_MOUSE	22	AC[+57.0214635]GNFGIPC[+57.0214635]ELR;AEYEGDGIPTVFVSVAGR;ASILNTWISLK;C[+57.0214635]GETAFIAPQC[+57.0214635]EMIPIEWVC[+57.0214635]R;DDANNDPQWSEEQLIAAK;DLKEVTPEGLQMVK;DQITAGNAAR;EIVLADVIDNDSWR;EVTPEGLQMVK;EVTPEGLQMVKK;EVYELLDTPGR;IKAEYEGDGIPTVFVSVAGR;ITSC[+57.0214635]IFQLLQEAGIK;NFEWVADR;NFEWVADRVELLLK;RNPGVQEGYK;SWLPQDC[+57.0214635]TLVDMK;TKEVYELLDTPGR;VEMFFKDDANNDPQWSEEQLIAAK;VLLQSKDQITAGNAAR;VTS…		7.62623	7.61248	7.68713	6.58706	6.70112	6.41958	6.05689	6.01648	6.13184	7.49101	7.33072	7.27613	6.5692	6.34667	6.38484	5.95211	5.79978	5.88841	7.2247	7.29586	7.38279	6.29301	6.55505	6.2993	5.95111	6.07178	6.0396
sp|Q9CY21|BUD23_MOUSE	1	LYC[+57.0214635]FFSSLYSALVR		-1.80715	-1.85159	-1.91883	-2.88438	-3.36844	-1.92047	-3.64602	-5.66272	-4.52713	-1.30269	-2.14544	-3.66317	-2.80907	-4.11821	-7.32067	-4.79365	-6.65542	-4.99821	-2.24045	-2.80965	-3.2657	-3.12695	-3.64422	-9.67934	-4.63653	-3.41583	-3.83041
sp|P14602-2|HSPB1_MOUSE;sp|P14602|HSPB1_MOUSE	12	AQIGGPEAGKSEQSGAK;AVTQSAEITIPVTFEAR;EGVVEITGK;EGVVEITGKHEER;HEERQDEHGYISR;LFDQAFGVPR;QDEHGYISR;QLSSGVSEIR;SPSWEPFR;SPSWEPFRDWYPAHSR;TKEGVVEITGK;VSLDVNHFAPEELTVK		6.89077	6.88364	6.90392	6.30449	6.03586	6.13512	4.95662	4.90283	4.99365	7.08826	7.09714	7.24144	6.20772	6.02776	6.18742	5.42548	5.5951	5.42821	7.57373	7.51992	7.4378	6.62007	6.3464	6.58446	6.02256	5.66683	5.05719
sp|Q8BKG3|PTK7_MOUSE	17	ADGSSLPEWVTDNAGTLHFAR;AQGVEEGATETLVLVK;C[+57.0214635]EAQGDPKPLIQWK;C[+57.0214635]VSSTPAGSIEAQAR;DGTPLSDDQSTHTVSSR;DRPSFSEIASTLGDSPADSKQ;DVYNSEYYHFR;EPSSQDALQGR;GPPIVLEATLHLAEIEDMLPFEPR;HPASEAEIQPQTQVTLR;INSVEVYDGTLYR;NQMLISEDSR;SEFGEVFLAK;TTVYQGHTALLR;VALC[+57.0214635]SQVALGMEHLSNNR;VFIAGDEER;VVLAPQDVVVAR		2.95774	2.89666	3.0758	3.69991	3.67559	3.68833	4.10372	4.18036	4.02228	2.72891	2.68383	2.95564	3.55131	3.51238	3.59434	3.25193	3.45959	3.19968	2.5727	2.6875	2.74977	3.30333	3.6403	3.84931	3.72925	4.40759	4.5748
sp|Q810A7|DDX42_MOUSE	18	DDIEEEDDQEAYFR;DIPVLVATDVAAR;DSNFAGDLVR;ELC[+57.0214635]QQIHAEC[+57.0214635]K;ELLDLAMQNAWFR;GFGFGGFAISAGK;GNNNNVMSNYEAYKPSTGAMGDR;GVAYTLLTPK;KSEYTQPTPIQC[+57.0214635]QGVPVALSGR;LPQQSHSAFGAASSSSGFGK;MFDMGFEYQVR;SEYTQPTPIQC[+57.0214635]QGVPVALSGR;SHFVAASLSNQK;SVAVYGGGSMWEQAK;TAAFIWPMLIHIMDQK;TVINYDVAR;VSYLVFDEADR;VVQGDIGEANEDVTQIVEILHSGPSK		4.53776	4.54752	4.62536	4.17703	3.96802	3.99694	3.70225	3.65563	3.49477	4.50935	4.56519	4.74926	4.07686	3.94975	3.88228	3.84815	4.07809	3.60129	4.58769	4.64185	4.63089	4.09993	4.05038	4.16638	3.37738	3.66674	3.76452
sp|P53995|APC1_MOUSE	20	AHSPALGVHSFSGAQR;APDTMYLLDFVKPEFLLLR;ARPSDTGSDEDWEYLLNSEYHR;DLETLPFGIALPIR;DYIASLPFQVANVWATK;EDPMGWQSLLAQTVANR;EPLPTMFSMLHPLDEITPLVC[+57.0214635]K;FNLSSHSQSPK;GLFINSEFLPVVK;GMFTLFSYHPVPTEPLPVPK;HLPPMGLEGSTSFAELLYR;IAPASQIDSAWIVYNKPK;LDSYLDHYYR;LLGSMDEVVLLSPVPELR;LNDSLYNEDC[+57.0214635]TFQQLGTYIHSVR;SFDFEGSLSPVIAPK;SLC[+57.0214635]LTALEVSNAK;SPSISNMAALSR;SQLNMLAC[+57.0214635]FLVYHSVPAPR;VFITTDLC[+…		1.84775	1.91998	2.11817	1.85739	1.9952	2.02797	2.04866	2.06958	2.20233	1.73172	1.8693	1.84346	1.98105	1.90356	1.831	2.07587	2.12131	2.21174	1.63215	1.72286	1.77573	1.86324	1.95614	1.9475	1.8897	2.06292	2.19032
sp|Q61189|ICLN_MOUSE	4	DPNAYPQEHLYVMVNAK;GLGTGTLYIAESR;LQQPDTEAVLNGK;LSWLDGSGLGFSLEYPTISLHAVSR		3.54691	3.39439	3.49072	2.43871	1.72669	2.03404	1.41183	1.32905	1.30696	3.39828	3.42677	3.70373	2.13946	1.76934	1.65055	1.56558	1.71902	1.27985	3.69525	3.6916	3.5287	2.27678	1.8352	2.1146	1.02943	1.48263	1.61247
sp|P08122|CO4A2_MOUSE	13	AHNQDLGLAGSC[+57.0214635]LAR;ATPFIEC[+57.0214635]NGGR;GEQGFMGNTGPSGAVGDR;GLDGFQGPSGPR;GLPGALGEIGPQGPPGDPGFR;GTC[+57.0214635]HYFANK;GVSGFPGADGIPGHPGQGGPR;HSQTDQEPMC[+57.0214635]PVGMNK;IAVQPGTLGPQGR;LWSGYSLLYFEGQEK;RGLPGALGEIGPQGPPGDPGFR;SVSIGYLLVK;YSFWLTTIPEQNFQSTPSADTLK		-1.60846	-2.06096	-2.03203	3.84458	3.53221	3.54809	5.66241	6.23101	5.15156	-0.613515	-0.878296	-0.373229	4.80512	4.67394	4.83436	6.50566	6.79001	7.35788	-1.96763	-1.95905	-1.79077	3.28508	3.50636	3.57994	5.3132	5.97511	5.04311
sp|O70194|EIF3D_MOUSE	13	FMTPVIQDNPSGWGPC[+57.0214635]AVPEQFR;IFHTVTTTDDPVIR;IFHTVTTTDDPVIRK;NLAMEATYINHNFSQQC[+57.0214635]LR;NMVQFNLQTLPK;SDWEVKEEMDFPQLMK;SVYSWDIVVQR;TLNEWDSR;TQGNVFATDAILATLMSC[+57.0214635]TR;VADWTGATYQDK;VADWTGATYQDKR;WTC[+57.0214635]C[+57.0214635]ALLAGSEYLK;YNFPNPNPFVEDDMDKNEIASVAYR		5.73861	5.85294	5.87204	4.89892	4.92963	4.62204	4.51555	4.56488	4.48372	5.65034	5.63137	5.73386	4.99732	4.76061	4.83795	4.73041	4.94366	4.75719	5.67166	5.68938	5.74694	4.7862	4.99223	4.90428	4.35616	4.49294	4.46928
sp|O09167|RL21_MOUSE	5	HAAPPREAHFVR;HGVVPLATYMR;KHGVVPLATYMR;VYNVTQHAVGIIVNK;VYNVTQHAVGIIVNKQVK		5.85837	5.79119	5.63346	4.40294	5.29642	4.77053	4.92146	4.67854	4.82163	5.66217	5.70685	6.04275	4.6634	5.09529	5.09858	5.08609	5.19966	4.68488	5.70906	5.72669	5.60864	4.69178	4.97708	5.16691	4.91474	4.62664	4.86834
sp|Q9ERR7|SEP15_MOUSE	5	GC[+57.0214635]C[+57.0214635]QEEAQFETK;GC[+57.0214635]C[+57.0214635]QEEAQFETKK;LLDDNGNIAEELSILK;WNTDSVEEFLSEK;WNTDSVEEFLSEKLER		0.00693238	-0.189782	0.0703461	0.589015	0.339641	0.3764	1.1851	1.19114	1.21206	0.0760821	0.117477	0.753085	0.515899	0.645349	0.760153	1.84194	1.73658	2.03792	0.521928	0.375245	0.471662	0.681703	0.435784	1.18734	1.46167	1.28593	1.43138
sp|Q61001|LAMA5_MOUSE	43	AGALLPAIR;AHPVSNAIDGTER;AIQVFLLAGNR;APQQGVLNLHPC[+57.0214635]PYSSLC[+57.0214635]R;ATLQAASLILGHVSELLQGIDQAK;AVAAEALSTATHVQSQLQGMQK;C[+57.0214635]DC[+57.0214635]SPC[+57.0214635]GTETC[+57.0214635]DPQSGR;C[+57.0214635]DVGGALGQGC[+57.0214635]EPK;DGFFGLDYADYFGC[+57.0214635]R;DHYLPDLHHMR;DLADLAAYTALK;DLGAQGAVAEAELAEAQR;EELMMVLAGLEQLQIR;FANSPRPDLWVLER;FGFNPLEFENFSWR;FHIQSPVPAPEPGK;FMNQEVETQR;GDSC[+57.021…		2.60544	2.76565	2.6628	4.35233	4.12869	4.20048	5.19961	5.37918	4.89588	2.85099	2.63762	2.70086	4.39333	4.18236	4.31662	4.4997	4.59769	4.82119	2.16193	2.62144	2.33496	4.18956	4.36526	4.50567	5.03413	5.47945	5.11886
sp|Q8C5Q4|GRSF1_MOUSE	4	GLPFQANAQDIINFFAPLKPVR;ITMEYSSSGK;NSENGIHFLLNR;SLQVKPSPVLSDGVVR		-0.24556	0.0859829	0.274685	-0.442589	-0.475575	-0.365132	-0.871225	-0.837601	-1.44196	0.0573338	0.238191	0.132535	-0.303821	-0.540001	-0.541022	-0.845856	-1.02026	-0.956604	0.319806	0.298068	0.407411	-0.1027	-0.204232	-0.583836	-0.755341	-0.615507	-0.515428
sp|Q8C0C7|SYFA_MOUSE	12	C[+57.0214635]WELTTEGEEIAR;DRPFKPYNFSAR;FKPAYNPYTEPSMEVFSYHQGLK;GVLPDSGHLHPLLK;LEVADGGLDSAELATQLGVEHQAVVGAVK;LQLVQAGQAEK;SIPLEGLVQSELMHLPSGK;SLQALGEVIEAELR;THSQGGYGSQGYK;VNLQMVYDSPVC[+57.0214635]R;VVDSIEDEVQK;VVDSIEDEVQKR		4.45919	4.52107	4.62209	3.81924	3.72746	3.78672	3.49864	3.55139	3.57132	4.48647	4.51017	4.63859	3.75042	3.74803	3.73026	3.75053	3.85186	3.69485	4.58621	4.64948	4.66862	3.88128	3.74918	3.81913	3.51029	3.54312	3.61394
sp|Q9QY06-2|MYO9B_MOUSE;sp|Q9QY06-3|MYO9B_MOUSE;sp|Q9QY06|MYO9B_MOUSE	6	DSTTSDVIQDVVASLHLDGSK;EDGLEAWTETTAPSSSK;ELC[+57.0214635]FDDELVLQQLR;ESGGEEWVLDASDSPVHR;VALLEDVNR;YFLGTPVLEPAFIIQHFAGR		-2.51997	-2.98582	-2.89489	-2.32223	-3.54671	-3.67489	-3.36977	-2.94708	-3.86633	-4.38871	-4.00082	-3.0964	-2.94084	-2.9872	-2.98976	-3.12883	-2.94636	-2.95479	-2.76033	-3.52119	-3.6019	-2.74758	-2.85117	-3.23662	-3.43303	-3.1027	-2.94946
sp|Q9WUD8|FAIM1_MOUSE	1	METAGEFVDDGTETHFSVGNHGC[+57.0214635]YIK		-3.89158	-4.36762	-3.71461	-3.63137	-4.25551	-3.9645	-3.95322	-4.92595	-4.28521	-3.98288	-4.6061	-4.18833	-4.01033	-3.9498	-3.88366	-4.49575	-6.02521	-5.24617	-4.34355	-4.16859	-3.87269	-4.2255	-4.24039	-3.72327	-4.39704	-4.13699	-4.17842
sp|P09411|PGK1_MOUSE	27	AHSSMVGVNLPQK;AKQIVWNGPVGVFEWEAFAR;ALESPERPFLAILGGAK;DC[+57.0214635]VGPEVENAC[+57.0214635]ANPAAGTVILLENLR;FHVEEEGKGK;GC[+57.0214635]ITIIGGGDTATC[+57.0214635]C[+57.0214635]AK;IQLINNMLDK;ITLPVDFVTADK;ITLPVDFVTADKFDENAK;LGDVYVNDAFGTAHR;LTLDKLDVK;NNQITNNQR;QIVWNGPVGVFEWEAFAR;SLLGKDVLFLK;SLMDEVVKATSR;SVVLMSHLGRPDGVPMPDK;TGQATVASGIPAGWMGLDC[+57.0214635]GTESSK;TGQATVASGIPAGWMGLDC[+57.0214635]GTESSKK;VAD…		8.28841	8.32446	8.50976	7.69549	7.63685	7.69386	7.49643	7.63181	7.59297	8.24375	8.3272	8.53783	7.84738	7.71431	7.78273	8.2617	8.54608	8.43902	8.15034	8.29339	8.41259	7.54566	7.75149	7.74315	7.40862	7.57906	7.39742
sp|Q99J77|SIAS_MOUSE	12	ALERPYTSK;GRPMVISSGMQSMDTMK;GSDHSASLEPGELAELVR;HLEFSHDQYK;HPC[+57.0214635]FIIAEIGQNHQGDIDVAK;IPAGTTLTLDMLTVK;KGRPMVISSGMQSMDTMK;LFPDIPIGYSGHETGIAISVAAVALGAK;QLLPC[+57.0214635]EMAC[+57.0214635]NEK;VGSGDTNNFPYLEK;VKIPAGTTLTLDMLTVK;VLVTIEEDDTVMEESVESHSK		3.0832	2.90063	3.00572	3.74322	3.44345	3.64967	3.78163	3.64202	3.77198	3.09168	2.93821	2.78135	3.77013	3.5286	3.42288	3.84284	3.73081	3.85296	3.00191	3.05195	2.85017	3.66272	3.56642	3.52095	3.68053	3.79596	3.71881
sp|Q99JF8|PSIP1_MOUSE	15	DFKPGDLIFAK;ETNVSKEDTDQEEK;GFNEGLWEIDNNPK;HTEMITTLK;KGFNEGLWEIDNNPK;LPIFFFGTHETAFLGPK;NMFLVGEGDSVITQVLNK;NMLKGQHEK;NSLKIDNLDVNR;QPC[+57.0214635]PSDGDMVIDEDK;QPC[+57.0214635]PSDGDMVIDEDKSK;QSNASSDVEVEEK;QVDTEEAGMVTAATASNVK;VDEVPDGAVKPPTNK;VSQVIMEK		4.94715	4.79071	4.90993	4.91411	4.74229	4.66859	3.95443	4.15264	4.12139	4.82772	5.04097	5.18121	4.65575	4.77979	4.66832	3.55268	3.47417	3.6193	5.00574	4.95802	4.76351	4.79768	4.59693	4.87728	3.59971	4.23115	4.26973
sp|Q9JK81|MYG1_MOUSE	14	ALDQVSGIPGC[+57.0214635]IFVHASGFIGGHHTR;ALVEEALAQR;AMDLVQEEFLQR;ATLAQRPAPVPLANAVVQ;FKVDSSGEIVELAK;LASC[+57.0214635]DIVVDVGGEYNPQSHR;LNFYQHSWLPAR;LNPTWNQPNQDTEAGFR;LNPTWNQPNQDTEAGFRR;LPLPEPWR;LSSAGLVYLHFGR;TFTETMSSLC[+57.0214635]PGKPWQTK;VDSSGEIVELAK;YAMTTTLSAR		4.58357	4.7418	4.67817	4.48638	4.33468	4.38394	4.4666	4.54004	4.38263	4.74784	4.75029	4.88783	4.61275	4.22201	4.24164	4.43731	4.86868	4.37001	4.78708	4.86244	4.79298	4.2871	4.37645	4.27425	4.11354	4.37691	4.43396
sp|O35465-2|FKBP8_MOUSE;sp|O35465|FKBP8_MOUSE	4	SC[+57.0214635]SQVLEHQPDNIK;TAEDGPDLEMLSGQER;VDMTC[+57.0214635]EEEEELLQLK;VLAQQGEYSEAIPILR		1.32987	1.23442	1.37421	0.581169	0.868834	0.991249	1.18961	1.12665	0.979728	1.45967	1.3468	1.40434	0.725208	0.866244	1.02463	1.15351	1.24258	0.856186	1.20374	1.59967	1.51132	0.790198	0.872025	1.37092	1.19638	1.157	1.14528
sp|Q9CZR8|EFTS_MOUSE	4	FQQLVQQVALGTMAHC[+57.0214635]QNLTDR;GFLNSSELSELAAGPDR;LGQHVVGMAPLSVGSLDDEPGGETETR;VPSGFYVGSYVHGVTQSPSLQNLVLGK		2.6162	2.50323	2.77296	2.40758	2.262	2.28336	2.23609	2.30283	2.16774	2.64497	2.60292	2.72726	2.40704	2.45645	2.49095	2.20039	2.27668	2.1412	2.67417	2.80157	2.73099	2.45988	2.67675	2.82086	2.13233	2.37362	2.22509
sp|Q99P88|NU155_MOUSE	29	C[+57.0214635]ITDTLQELVNQSK;FVLLSAQGSLMFHK;GVIQVYDLGHDGQGMSR;HGEPEEDVVGLQTFQER;HLLVSNVGGDGEEIER;IMGNIWDASLVVER;IQLQIQETLQR;ISLQAIQQLVR;ISNQVDLPSVC[+57.0214635]AQYR;KDPQGLGLHFYK;LADMHSTEISLQQR;LAVIHC[+57.0214635]AGYSDPILVHTLWQDIIEK;LLC[+57.0214635]EHQFSVIVGELQK;LLEVYDQLFK;LLQIASPFLEPHLVR;LVGFMRPENGNTQQMQQELQR;LYFSTC[+57.0214635]PFR;LYGEFADPFK;NSQFSGGPLGNPNTTAR;SEKGVIQVYDLGHDGQGMSR;SPLHLLDC[+57.021…		4.91536	5.00416	5.11987	4.65139	4.79066	4.69497	4.60319	4.40845	4.64274	4.9334	4.85915	4.86774	4.723	4.57617	4.63469	4.60897	4.62558	4.54741	4.82529	4.92115	5.00424	4.77402	4.88888	4.72043	4.78669	4.57885	4.57
sp|Q9CZ42-2|NNRD_MOUSE;sp|Q9CZ42-3|NNRD_MOUSE;sp|Q9CZ42|NNRD_MOUSE	5	AILTPNHVEFSR;IGIVGGC[+57.0214635]QEYTGAPYFAGISALK;LSQALGNITVVQK;LWEAVLSSPMDSNDLK;SYSPELIVHPVLDSSNAVEEVEK		-1.23452	-1.04473	-0.903971	-0.25797	-0.827653	-0.642598	0.524164	0.53467	0.237597	-1.14869	-1.3276	-0.985983	-0.307198	-0.231445	-0.406837	0.761714	0.846196	0.705009	-1.67689	-1.34991	-1.41736	-0.299585	-0.394229	0.172651	0.516409	0.636724	0.403142
sp|Q8VEH8|ERLEC_MOUSE	2	ASPVNDIFC[+57.0214635]QSLPGSPFKPLTLR;IESYWTYEVC[+57.0214635]HGK		-3.09054	-2.92539	-3.02472	-1.47209	-0.777451	-1.31871	-0.685332	-0.838167	-0.172646	-3.29619	-3.9949	-4.66061	-0.97916	-0.812645	-0.601958	-0.142626	-0.252303	-0.541583	-5.64327	-3.45332	-3.46806	-1.86018	-0.530015	-0.904148	-0.802506	-1.12805	-1.12421
sp|Q80UM7|MOGS_MOUSE	11	GFLWDEGFHQLVVQR;GPSGQGQFLIQQVTLK;HTC[+57.0214635]EQGDGVGPYGWEFHDGR;LGPLLDVLADSR;LNSWFQHRPPGASPDR;LTLLPPTSPGDTVPK;LVGSQLTQALESHAAAFK;MDPALFPPVPLFSGVPSR;QQYQATGFLWEQYSDQDGR;RPGGQHGGDWSWR;SPKPLLTGLMWAQQGATPGTPPK		0.991402	1.31197	1.49722	1.86841	1.97295	1.94124	2.26803	2.45147	2.38944	1.29811	1.37146	1.61919	2.12684	2.08903	1.84325	2.72744	3.09661	2.86103	1.02104	1.28005	1.15144	1.89296	2.08481	1.71852	2.01447	2.42065	2.30105
sp|P19783|COX41_MOUSE	8	ANPIQGFSAK;DYPLPDVAHVTMLSASQK;EKADWSSLSR;IQFNESFAEMNR;SEDYAFPTYADR;SEDYAFPTYADRR;SYVYGPIPHTFDR;WDYDKNEWK		3.89623	3.94831	3.87772	4.24986	4.18329	4.16703	4.48128	4.49331	4.54243	3.96536	4.05107	4.16646	4.17774	4.29441	4.59378	4.76741	4.88156	4.68264	4.5271	4.27826	4.32463	4.74225	4.18127	4.6875	4.94454	4.51899	4.55929
sp|Q8CHW4|EI2BE_MOUSE	12	AEGVNSKEDEELR;C[+57.0214635]HEDNVVMAVDSATNR;DTTDEGQQLR;ESSPSHPTR;GYNPAEVGLEGQGYLWK;NVSVMTMVFK;QSLWGLMIK;VAAGAQIHQSLLC[+57.0214635]DR;VFQNEVLGTLQR;WC[+57.0214635]HPTSPNVVR;WVYPLTPEVNFTDSTTQSYTHSR;YC[+57.0214635]ALLLPLLK		3.57161	3.53442	3.6768	2.64618	2.80326	2.49148	2.35574	2.34994	2.31694	3.56384	3.45763	3.48619	2.6274	2.56421	2.70151	2.19902	2.07011	2.02071	3.30555	3.41214	3.48545	2.44531	2.6852	2.67614	2.05007	2.30323	2.15942
sp|Q9QYA2|TOM40_MOUSE	10	ELFPVQMEGVK;FQVTHTVALGTIGESNYHFGVTYVGTK;FVNWQVDGEYR;GSVNSNWIVGATLEK;KLPPLPLTLSLC[+57.0214635]AFLNHR;LPPLPLTLSLC[+57.0214635]AFLNHR;MAIQTQQSK;MQDTSASFGYQLDLPK;RPGEEGTVMSLAGK;YTLNNWLATVTLGQAGMHATYYHK		4.84812	4.79647	4.85055	4.68749	4.66275	4.67611	4.2864	4.13472	4.22495	4.96019	4.86337	5.0138	4.86463	4.60205	4.62553	4.49766	4.46289	4.51744	4.87734	4.93761	4.89476	5.02041	5.03195	5.09486	4.64608	4.53543	4.37208
sp|P68373|TBA1C_MOUSE	1	AYHEQLTVAEITNAC[+57.0214635]FEPANQMVK		6.31342	6.2694	5.74015	4.93476	5.32905	5.70781	5.89297	5.89727	5.56788	6.33773	6.21741	5.7554	6.09047	5.66827	5.3967	5.78716	5.57061	5.61375	5.99973	6.46663	5.84081	5.85246	6.00378	5.94777	5.96755	6.09917	5.80113
sp|A2A5R2|BIG2_MOUSE	8	ANFIEADKYFLPFELAC[+57.0214635]QSK;ATLTQMLNVIFTR;C[+57.0214635]ISQLELAQLIGTGVK;DLYVNPNHQATLGQER;GQSQLSNPTDDSWK;GTDSGAQEVVKDILEDVVTSAVK;LPDQEMGDGK;VLQEYTSDDMNVAPGDR		-0.715018	-0.502059	-0.397959	-0.0442827	-0.137234	-0.262109	0.0693248	-0.102684	-0.0600852	-0.552396	-0.629968	-0.574577	0.127031	0.0638224	-0.00796592	0.302445	0.454466	0.271132	-0.808802	-0.739892	-0.556745	-0.247566	-0.0042605	-0.308756	-0.0791369	-0.150987	0.0673971
sp|Q99KJ8|DCTN2_MOUSE	11	ASVEDADTQNK;ASVEDADTQNKVHQLYETIQR;ENLATVEGNFASIDAR;LLGPDAAINLADPDGALAK;LLGPDAAINLADPDGALAKR;LLHEVQELTTEVEK;LTELEATVR;TGYESGDYEMLGEGLGVK;VHQLYETIQR;VSALDLAVLDQVEAR;WSPVASTLPELVQR		2.18855	2.18754	2.18478	2.50587	2.35238	2.42981	2.85569	2.89345	2.74857	2.38784	2.25818	2.5878	2.36682	2.57828	2.81051	3.35262	3.35492	3.2606	2.29216	2.44254	2.60487	2.6049	2.32205	2.88379	3.00048	2.69288	2.73909
sp|Q5EG47|AAPK1_MOUSE	3	DLKPENVLLDAHMNAK;FEC[+57.0214635]SEEEVLSC[+57.0214635]LYNR;LFQQILSGVDYC[+57.0214635]HR		-2.8872	-3.84454	-3.73896	-3.98147	-5.047	-4.20941	-3.1418	-3.00715	-3.16293	-3.03528	-3.60007	-5.21966	-5.36363	-4.63164	-4.23754	-3.34911	-4.4562	-3.38072	-4.099	-3.79593	-3.75232	-4.2946	-4.60577	-3.73371	-2.50495	-3.63652	-3.2407
sp|P47811-3|MK14_MOUSE	1	TLFPGTDHINQLQQIMR		-7.369	-7.76257				-8.23752					-9.90665	-8.54159							-8.80352	-6.00051
sp|Q8CD15|RIOX2_MOUSE	4	EFWEQKPLLIQR;QIWC[+57.0214635]GSPIR;VQPTGDENEEASVPC[+57.0214635]K;YYQSLFSLSDLKR		-3.97535	-3.50358	-3.50951	-5.74075	-4.98766	-5.33335	-5.82793	-5.99736	-6.39616	-3.52567	-3.53688	-3.57099	-5.9196	-5.46354	-6.2607	-4.80202	-5.95242	-6.88056	-3.37083	-3.29679	-3.20526	-5.04862	-6.65069	-8.08286	-5.90406	-6.67121	-6.09509
sp|Q9JKC8|AP3M1_MOUSE	4	GLVNLQSGAPKPEENPNLNIQFK;LSGMPDLSLSFMNPR;VSSQNLVAIPVYVK;VVLNMNLTPTQGSYTFDPVTK		0.864153	1.10038	1.1924	1.33528	1.51563	1.53654	1.75266	1.72701	1.68148	1.08604	1.10414	1.44267	1.55898	1.41352	1.45968	2.11459	2.28253	2.20563	1.24692	1.29968	1.16666	1.29615	1.43726	1.63733	1.55191	1.68924	1.79724
sp|P16460|ASSY_MOUSE	10	APNSPDVLEIEFK;EQGYDVIAYLANIGQK;EQGYDVIAYLANIGQKEDFEEAR;FAELVYTGFWHSPEC[+57.0214635]EFVR;FELTC[+57.0214635]YSLAPQIK;GIYETPAGTILYHAHLDIEAFTMDR;QHGIPIPVTPK;SPWSMDENLMHISYEAGILENPK;TQDPAKAPNSPDVLEIEFK;TTSLELFMYLNEVAGK		3.39896	3.49904	3.53249	3.1342	2.85143	2.62732	2.37016	2.00931	2.23649	3.60397	3.28232	3.10316	3.16438	2.61409	2.40029	1.60254	1.57099	1.47942	4.1472	4.06676	4.18115	3.36336	3.22591	2.7154	2.22508	2.38364	2.13916
sp|Q99LB6-2|MAT2B_MOUSE;sp|Q99LB6|MAT2B_MOUSE	9	AVLENNLGAAVLR;EFQQSNWHTVGC[+57.0214635]GFR;ESLWPFLIDK;ESLWPFLIDKR;GTFHWSGNEQMTK;IPVLYGEVEKLEESAVTVMFDK;NAQLDC[+57.0214635]SKLETLGIGQR;RPDVVESQPDAASQLNVGASGNLAK;VLITGATGLLGR		2.91609	2.94767	2.94562	2.22722	1.89462	1.98556	1.75393	2.00747	1.76078	2.91724	3.05302	3.34074	1.91867	1.8415	1.96356	1.67526	1.81499	1.50529	3.25906	3.09813	3.13371	2.25225	1.82638	1.94241	1.62208	1.78903	1.86657
sp|Q8K4B0|MTA1_MOUSE	10	ATVVNGTGTPGQSPGAGR;DFTDIQQDFLPWK;DISSSLIALADK;DITLFHAMDTLHK;HPYMPINSAAIK;LPEASQSPLVLK;MNWIDAPDDVFYMATEETRK;QVYIPNYNKPNPNQISASSVK;SAPVINNGSPTILGK;SAPVINNGSPTILGKR		2.24541	2.17617	2.36196	2.64201	2.42627	2.53616	2.18318	2.29689	2.13195	2.18692	2.36954	2.70076	2.4055	2.26802	2.4189	1.92692	2.00806	2.07405	2.27782	2.50875	2.2076	2.48832	2.48694	2.86523	1.95007	2.30996	2.43068
sp|Q4VBE8|WDR18_MOUSE	11	EHSFQPEQNTGK;FTGDGSHFVSAGK;GLALLNGEYLLAAQQGK;HLLGAEHGDEAQGGGLR;HYQDVSC[+57.0214635]LK;LEQLQAVLSSYLEK;NMLGSQMLPAR;NQVTC[+57.0214635]LSVSTDGSVLLSGSHDESVR;NYIC[+57.0214635]AWELQR;VATASLDQTVK;VFDLEDEVR		4.52157	4.58898	4.57553	3.76303	3.96547	3.83652	3.54601	3.47344	3.5377	4.48828	4.38399	4.4897	3.95412	3.77217	3.85891	3.39837	3.52559	3.35493	4.2728	4.45329	4.45101	3.83086	4.10119	4.16164	3.5821	3.58689	3.53998
sp|Q8CIB5|FERM2_MOUSE	15	AKDQNESLDEEMFYK;EELIGIAYNR;EESSGTPAHQLNLR;FIQAWQSLPEFGITHFIAR;GC[+57.0214635]EVTPDVNISGQK;GC[+57.0214635]EVTPDVNISGQKFNIK;ILEAHQNVAQMSLIEAK;INQLYEQAK;LLIPVAEGMNEIWLR;LSFIC[+57.0214635]TEVDC[+57.0214635]K;LSIMTSENHLNNSDK;MVTVEFADEVR;SLMEQDVKENEALLLR;SREESSGTPAHQLNLR;YYSFFDLNPK		3.28602	3.39457	3.41945	2.95267	2.94817	2.90269	2.96224	2.78884	2.91811	3.50695	3.41044	3.51617	3.02471	2.75879	2.65121	2.68836	2.70671	2.70759	4.29123	4.31508	4.4239	3.00842	3.15534	2.72485	2.73211	2.94634	3.07659
sp|Q8CIG8|ANM5_MOUSE	13	AAILPTSIFLTNK;AAILPTSIFLTNKK;DDVIANAPTTHTEEYSGEEK;DRDPEAQFEMPYVVR;DWNTLIVGK;IAVALEIGADLPSNHVIDR;KVWYEWAVTAPVC[+57.0214635]SSIHNPTGR;QGFDFLC[+57.0214635]MPVFHPR;QPITVHEGQNIC[+57.0214635]VR;TWMWWHNFR;VPLVAPEDLR;VWYEWAVTAPVC[+57.0214635]SSIHNPTGR;YSQYQQAIYK		5.21024	5.19037	5.43523	4.18562	4.18684	4.13383	3.7061	3.87683	3.89613	5.28451	5.20085	5.40471	4.18085	4.11482	4.11241	3.76615	3.53391	3.86763	5.2583	5.30346	5.41027	4.19537	4.22748	4.13502	3.71539	3.91353	3.89594
sp|Q8CCF0|PRP31_MOUSE	11	IMGVAGGLTNLSK;IYEYVESR;LEEAC[+57.0214635]DMALELNASK;MPAC[+57.0214635]NIMLLGAQR;MSFGEIEEDAYQEDLGFSLGHLGK;MSFIAPNLSIIIGASTAAK;QANVSEVMGPVEAAPEYR;RFPELESLVPNALDYIR;VDSFHESTEGK;VIVDANNLTVEIENELNIIHK;YFSSMAEFLK		4.15909	4.28327	4.35588	3.1529	3.26983	3.25025	2.79487	2.68969	2.84457	4.2859	4.26653	4.38523	3.23818	3.05178	3.0482	2.8073	3.0565	2.79104	4.19575	4.28489	4.39385	3.11421	3.26654	3.1115	2.60153	2.72318	2.87862
sp|Q9WUM4|COR1C_MOUSE	15	AIFLADGNVFTTGFSR;ETIC[+57.0214635]SQDER;KC[+57.0214635]EPIIMTVPR;KPTDTASVQNEAK;KPTDTASVQNEAKLDEILK;NADPILISLK;NDQC[+57.0214635]YDDIR;NGSLIC[+57.0214635]TASK;NILDSKPAANKK;RVGIVAWHPTAR;SIKETIC[+57.0214635]SQDER;VGIVAWHPTAR;VTWDSSFC[+57.0214635]AVNPR;YFEITDESPYVHYLNTFSSK;YFEITDESPYVHYLNTFSSKEPQR		5.049	5.09296	5.07112	4.81701	4.73358	4.69548	4.46076	4.47598	4.44227	5.0387	5.03327	4.99003	4.88718	4.71965	4.66844	4.83504	4.95126	4.84156	4.93894	5.05619	5.04675	4.63443	4.88649	4.50463	4.44865	4.61981	4.61217
sp|Q80VA0-2|GALT7_MOUSE;sp|Q80VA0|GALT7_MOUSE	2	ALPYGDISELKK;GLETAYC[+57.0214635]IDSMGK		-6.80343	-5.54858	-6.25352	-3.83696	-2.96334	-3.04817	-1.96783	-1.7414	-1.99171	-5.63477	-7.6037	-5.43324	-2.97683	-2.92548	-2.92631	-2.07796	-2.30175	-2.1667	-8.48907	-4.03304	-4.93452	-3.1106	-3.0351	-2.56338	-2.19659	-2.40779	-2.17297
sp|P57784|RU2A_MOUSE	4	GGPSAGDVEAIK;GGPSAGDVEAIKNAIANASTLAEVER;LTAELIEQAAQYTNAVR;NAIANASTLAEVER		2.16497	2.01213	1.82224	1.13139	0.748175	1.08876	0.830258	1.26032	0.926701	2.04153	2.39703	2.59877	0.659333	1.39314	1.56723	1.17853	0.612353	1.08638	2.70354	2.20394	2.3992	1.71602	0.880999	1.71641	1.47184	1.06671	1.13122
sp|P51660|DHB4_MOUSE	24	AAVAVPNRPPDAVLR;ALHGEQYLELYKPLPR;ANAVFEWHITK;AVANYDSVEAGEK;AVANYDSVEAGEKLVK;AYALAFAER;C[+57.0214635]EAVIADILDK;DATSLNQAALYR;GALVIVNDLGGDFK;GALVIVNDLGGDFKGIGK;GSSAADKVVAEIR;HVLQQFADNDVSR;IDVVVNNAGILR;ILMTSSASGIYGNFGQANYSAAK;ISDEDWDIIHR;KNNIHC[+57.0214635]NTIAPNAGSR;LGILGLC[+57.0214635]NTLAIEGR;NNIHC[+57.0214635]NTIAPNAGSR;NQPMTPEAVRDNWEK;SGSGEVYQGPAK;SMMNGGLAEVPGLSFNFAK;TSHAAPAATSGFVGAVGHK;VDSEGIS…		4.62345	4.66374	4.64633	5.47905	5.40023	5.33879	5.37001	5.53347	5.34098	4.52023	4.62579	4.71871	5.50121	5.32111	5.33723	5.04501	5.05946	5.02777	4.63158	4.69195	4.65515	5.48363	5.58082	5.5999	5.21584	5.47762	5.54355
sp|Q60598|SRC8_MOUSE	15	C[+57.0214635]ALGWDHQEK;ENVFQEHQTLK;HC[+57.0214635]SQVDSVR;HESQQDYAK;MDKNASTFEEVVQVPSAYQK;NASTFEEVVQVPSAYQK;QDSSAVGFDYK;QDSSAVGFDYKER;SAVGFDYQGK;SAVGFEYQGK;SAVGHEYQSK;TVPIEAVTSK;TVQGSGHQEHINIHK;VDKSAVGFEYQGK;VDQSAVGFEYQGK		3.80826	3.59139	3.74027	4.5232	4.27063	4.27134	4.55061	4.61175	4.46786	3.64728	3.68724	3.96637	4.58386	4.41147	4.52278	5.10436	5.25254	5.0135	3.69991	3.73533	3.58628	4.25342	4.17748	4.55805	4.42157	4.31358	4.35014
sp|P31230|AIMP1_MOUSE	11	AQTMANSGIK;EIEELKQELILAEIHNGVEQVR;GAEADQIIEYLK;GVLSQAMVMC[+57.0214635]ASSPEK;ITFDAFPGEPDK;ITFDAFPGEPDKELNPK;IWEQIQPDLHTNAEC[+57.0214635]VATYK;MVVLLC[+57.0214635]NLKPAK;QQSAAASTDSKPIDASR;TVVSGLVNHVPLEQMQNR;VEILAPPNGSVPGDR		4.55693	4.50589	4.49054	3.67061	3.55572	3.57122	3.31279	3.49862	3.32459	4.4153	4.56985	4.6878	3.67865	3.55039	3.79394	3.54093	3.85139	3.45387	4.58592	4.67794	4.5519	3.70754	3.66533	3.98453	3.39879	3.41566	3.29931
sp|Q8K3F7|TDH_MOUSE	12	ATLEVMEAPAER;DVNITGLHNVLDVAAEYNVR;HAPDFQITYC[+57.0214635]VDPLR;HDFDLPELVATMLNFHGVSTR;LFVPSTIGAFGPTSPR;LPMMYISDC[+57.0214635]LR;NGTFEC[+57.0214635]NLEAGTR;QAIAESWPMILDDSNAR;TYNISAMSFTPEELAQALRK;VHTELMGEYYYYR;VLITGGLGQLGVGLANLLR;YPGIISADSQPGGGTTDYAVQIFHAAAK		6.76825	6.8737	7.01532	3.14544	3.28462	3.39025	3.37334	3.4504	3.27659	6.73157	6.63319	6.81561	3.56795	3.44705	3.53155	3.80418	4.01516	3.77111	6.70354	6.89445	6.94046	3.08837	3.27046	3.35145	3.17672	3.21486	3.08951
sp|P97822-2|AN32E_MOUSE;sp|P97822|AN32E_MOUSE	5	DLSTVEALQNLK;ELEFLSMANVELSSLAR;IKDLSTVEALQNLK;KLELSDNIISGGLEVLAEK;SLDLFNC[+57.0214635]EITNLEDYR		2.6168	2.3582	2.41544	1.96326	1.95444	1.52034	1.95413	1.73882	2.0276	2.35774	2.32936	2.26662	1.97877	1.95426	2.10112	1.6481	1.01551	1.43315	2.55757	2.29458	2.4874	2.17394	1.68043	2.00608	2.20968	2.00691	2.00681
sp|P36993-3|PPM1B_MOUSE;sp|P36993-4|PPM1B_MOUSE;sp|P36993-5|PPM1B_MOUSE;sp|P36993|PPM1B_MOUSE	5	DSELDKHLESR;HVIEAVYSR;SGEEGMPDLAHVMR;SGSALEPSVESVK;SGSTAVGVMVSPTHMYFINC[+57.0214635]GDSR		2.35939	2.3833	2.40482	2.02036	1.77616	1.82157	1.61871	1.57399	1.49957	2.32842	2.21741	2.50812	1.9906	1.75675	1.56435	1.69442	1.88684	1.6437	2.32643	2.39168	2.40078	1.78438	1.92433	1.9561	1.51053	1.54914	1.68268
sp|Q9Z1F9|SAE2_MOUSE	25	ADPEAAWEPTEAEAR;ASNEDGDIKR;C[+57.0214635]RLEQMEDPDDVIALD;DVEFEVVGDSPEK;ELAEAVSGGR;FAMVAPDVQIEDGK;GDGAELIWDKDDPPAMDFVTSAANLR;GTILISSEEGETEANNPK;GTILISSEEGETEANNPKK;GVTEC[+57.0214635]YEC[+57.0214635]HPKPTQR;KLEENEAASTK;KLSDFGIR;LEENEAASTK;LQADDFLQDYTLLINILHSEDLGK;MC[+57.0214635]LAADVPLIESGTAGYLGQVTTIK;MC[+57.0214635]LAADVPLIESGTAGYLGQVTTIKK;MHIFSMNMK;NLVLTGFSHIDLIDLDTIDVSNLNR;NTPSEPIHC[+57.0214635]…		6.44696	6.5228	6.51584	5.85563	5.72848	5.58765	5.44309	5.30947	5.41207	6.30205	6.30556	6.26755	5.85838	5.57412	5.57438	5.36592	5.39474	5.33991	6.31149	6.3619	6.34674	5.70305	5.65359	5.62345	5.13487	5.3203	5.23358
sp|Q91W96|APC4_MOUSE	10	DITFVAEFLTEHFNEAPDLYNR;DLIALANTTGEVLLHR;EVTC[+57.0214635]LAWRPDGK;FGSFTSASADK;HTDISQSVSNGLIGIK;LGQSIESSYSSIQK;LVISHLQSGSESLLYHLSELK;MENVIDQC[+57.0214635]LQKPADVIGR;MTEDHVLPELNK;SMNQAIC[+57.0214635]IPLYK		0.554875	0.678117	0.728602	0.739621	0.599941	0.637082	0.596745	0.613812	0.710929	0.497238	0.631805	0.644458	0.796105	0.613022	0.623057	0.505855	0.207976	0.70274	0.555905	0.447775	0.652641	0.693759	0.575026	0.557278	0.290848	0.655718	0.730585
sp|A2AIV2|VIR_MOUSE	9	ALDSVISMTEGMEAFLR;C[+57.0214635]C[+57.0214635]SDFDLHSELER;LLALLDALASHK;LLELILLDQTVR;QILNADAMGC[+57.0214635]C[+57.0214635]GDDSGLMEVEGAHPPR;TSAVPNHSEPDQDTDAVLER;TVLDLIVEDLQSTSEDKEK;WVTALEEIPSLIIK;YAEIFQDLLALVR		0.365602	0.766709	0.727495	0.402833	0.376634	0.463632	-0.254346	-0.258969	-0.173906	0.60526	0.52221	0.51283	0.530887	0.141633	-0.542243	-0.1954	-0.188709	0.00241239	0.447204	0.525436	0.547597	0.477082	0.228525	-0.839081	-0.565349	-0.00750321	0.190847
sp|Q5PSV9|MDC1_MOUSE	7	AVLALGGSLASSVNEASHLVTDR;DHAEEVTQGKPTR;GIPILSLNWLYQSR;GQIASLTLKPGVGVK;LGLPLLSPEFLLTGVLK;TPEASVPTTPELQPFTSK;TPEPVVQTGPEFHPSTSTEQPDTR		1.61162	1.48963	1.52924	0.357852	0.381062	0.356998	-0.111529	0.020666	-0.221441	1.38301	1.53613	1.60364	0.17708	0.49771	0.240579	-0.0368208	-0.161967	-0.162852	1.42204	1.54513	1.38501	0.37366	0.365773	0.296898	-0.305345	0.220683	0.31234
sp|P24270|CATA_MOUSE	20	ASQRPDVLTTGGGNPIGDK;ASQRPDVLTTGGGNPIGDKLNIMTAGSR;DAILFPSFIHSQK;DAILFPSFIHSQKR;EAETFPFNPFDLTK;FNSANEDNVTQVR;FSTVTGESGSADTVR;GAGAFGYFEVTHDITR;GPLLVQDVVFTDEMAHFDR;HMNGYGSHTFK;IQALLDKYNAEKPK;LAQEDPDYGLR;LC[+57.0214635]ENIAGHLK;LGPNYLQIPVNC[+57.0214635]PYR;LNIMTAGSR;LVNADGEAVYC[+57.0214635]K;NAIHTYTQAGSHMAAK;NFTDVHPDYGAR;SALEHSVQC[+57.0214635]AVDVK;VWPHKDYPLIPVGK		4.72298	4.72281	4.78395	4.95669	4.89143	4.9117	5.28998	5.37025	5.37147	4.44891	4.49959	4.53097	4.9891	4.85039	4.96608	5.96215	6.06951	6.07706	4.14223	4.18889	4.19491	4.81746	4.88676	5.00669	5.51313	5.37388	5.22303
sp|P84104-2|SRSF3_MOUSE;sp|P84104|SRSF3_MOUSE	4	AFGYYGPLR;NPPGFAFVEFEDPRDAADAVR;VYVGNLGNNGNK;VYVGNLGNNGNKTELER		6.68914	6.74626	6.767	6.23676	6.4036	6.21576	6.1075	6.17089	5.98689	6.68459	6.67176	6.86852	6.47179	6.21597	6.27957	6.20981	6.71139	6.0874	6.69948	6.81701	6.64463	6.2313	6.49996	6.35993	5.84878	6.03889	6.19117
sp|P70372|ELAV1_MOUSE	13	AISTLNGLR;DANLYISGLPR;DKVAGHSLGYGFVNYVTAK;FAANPNQNK;FGGPVHHQAQR;GFGFVTMTNYEEAAMAIASLNGYR;NMALLSQLYHSPAR;RFGGPVHHQAQR;SEAEEAITSFNGHKPPGSSEPITVK;SLFSSIGEVESAK;TNLIVNYLPQNMTQEELR;VAGHSLGYGFVNYVTAK;VLVDQTTGLSR		6.24725	6.28429	6.25661	5.98585	5.92334	5.95378	5.70396	5.93642	5.71717	6.18162	6.33157	6.46793	5.97129	5.82585	5.88763	5.75343	6.1654	5.77362	6.25544	6.38006	6.23852	5.8947	5.97968	6.16389	5.59893	5.88991	5.8764
sp|Q65Z40|WAPL_MOUSE	12	AENSIC[+57.0214635]VADSNPLPYQNVTNHVGK;C[+57.0214635]SHVVGEDSFASDR;FLSFMNLTC[+57.0214635]AVGTTGQK;LEFFGFEDHDETGGDEGGSGSSNYK;SEDC[+57.0214635]ILSLDNESLLEMKDEDLK;SMDEFTASTPADLGEAGR;SMDEFTASTPADLGEAGRLR;SSQGASNFDKLMDGTSQSLAK;TGLYEWDNDFEDIR;TTLSTKWGETTFMAK;VIEYLEHC[+57.0214635];VLESVTVHNPENQSYLIAYK		1.59883	1.36102	1.48167	1.55678	0.866417	0.993511	1.27028	0.900466	0.638114	1.58795	1.56633	1.57231	1.22139	0.86604	1.20036	0.976324	0.8755	0.770969	1.6281	1.64383	1.53745	0.934699	0.907212	1.35991	0.923028	0.67128	0.578216
sp|P09055|ITB1_MOUSE	20	DNTNEIYSGK;EKLPQPVQVDPVTHC[+57.0214635]K;FC[+57.0214635]EC[+57.0214635]DNFNC[+57.0214635]DR;FQGPTC[+57.0214635]ETC[+57.0214635]QTC[+57.0214635]LGVC[+57.0214635]AEHK;GC[+57.0214635]QPSDIENPR;GEFFNELVGQQR;GIC[+57.0214635]EC[+57.0214635]GAC[+57.0214635]K;KGC[+57.0214635]QPSDIENPR;LLVFSTDAGFHFAGDGK;LPDGVTINYK;LPQPVQVDPVTHC[+57.0214635]K;LRPEDITQIQPQQLLLK;NVLSLTDRGEFFNELVGQQR;SAVTTVVNPK;SAVTTVVNPKYEGK…		3.83978	3.8843	3.8663	4.74304	4.61346	4.70624	4.71253	4.76353	4.6784	3.63932	3.64966	3.72027	4.64238	4.59728	4.66032	4.90483	5.32384	4.84061	3.44691	3.79045	3.7522	4.6088	4.73894	4.97537	4.70568	4.80149	4.71795
sp|Q8C1A5|THOP1_MOUSE	21	ALTTQLIEQTK;DAASGEEIGK;DFVEAPSQMLENWVWEKEPLMR;EELGGLPEDFLSSLEK;EYFPMQVVTR;FYLDLYPR;LKPLGEQER;LLEEAFNC[+57.0214635]R;LSLLC[+57.0214635]IDFNK;MKPPAAC[+57.0214635]AGDVVDAASPASTVNHLR;NILDFPQHVSPC[+57.0214635]K;NLNEDTTFLPFTR;QANAGLFNLR;TGSEAPQDLLEK;TGSEAPQDLLEKLIK;TSILRPGGSEDASAMLK;TSQTVATFLDELAQK;VDQVLHTQTDADPAEEYAR;VGAQNFEDVSYESTLK;YGHAAC[+57.0214635]FGLQPGC[+57.0214635]LR;YYMNQVEETR		5.4126	5.31266	5.37961	4.66891	4.5898	4.62937	4.41361	4.44641	4.36322	5.3849	5.37536	5.50762	4.50145	4.40232	4.51381	4.35026	4.22975	4.31079	5.41358	5.42648	5.39426	4.62203	4.45112	4.67222	4.24601	4.24959	4.3538
sp|Q6PB93-2|GALT2_MOUSE;sp|Q6PB93|GALT2_MOUSE	6	AAEVWMDEYK;GGFDWNLVFK;QKWEQIEGNSK;VLTFLDSHC[+57.0214635]EC[+57.0214635]NER;WDYMTPEQR;WYLDNVYPELR		8.63879e-05	-0.233396	0.105541	0.560049	0.857525	0.543278	1.42088	1.5033	1.44336	-0.0471568	-0.0934919	0.153639	1.01892	1.14267	1.25084	2.52343	2.30366	2.67682	-0.202701	0.0585207	0.195467	0.618297	1.10659	0.634252	1.55519	1.31805	1.27156
sp|P12970|RL7A_MOUSE	13	AGVNTVTTLVENK;AGVNTVTTLVENKK;HWGGNVLGPK;KMGVPYC[+57.0214635]IIK;KTC[+57.0214635]TTVAFTQVNSEDK;KVVNPLFEK;LKVPPAINQFTQALDR;MGVPYC[+57.0214635]IIK;NFGIGQDIQPK;TC[+57.0214635]TTVAFTQVNSEDK;TC[+57.0214635]TTVAFTQVNSEDKGALAK;TNYNDRYDEIR;VPPAINQFTQALDR		7.43955	7.40103	7.21511	6.5368	6.58846	6.50639	6.12058	6.22501	6.23	7.37201	7.56137	7.66447	6.34815	6.54317	6.90499	6.3503	6.26602	6.27788	7.66323	7.37527	7.55662	6.85005	6.51988	6.90763	6.36683	6.14744	6.12136
sp|Q9JIF0-2|ANM1_MOUSE;sp|Q9JIF0-3|ANM1_MOUSE;sp|Q9JIF0|ANM1_MOUSE	23	ANKLDHVVTIIK;ATLYVTAIEDR;DKVVLDVGSGTGILC[+57.0214635]MFAAK;DKWLAPDGLIFPDR;DVAIKEPLVDVVDPK;DYYFDSYAHFGIHEEMLK;DYYFDSYAHFGIHEEMLKDEVR;EPLVDVVDPK;EVDIYTVKVEDLTFTSPFC[+57.0214635]LQVK;GKVEEVELPVEK;GQLC[+57.0214635]ELSC[+57.0214635]STDYR;IHWWENVYGFDMSC[+57.0214635]IK;KVIGIEC[+57.0214635]SSISDYAVK;LDHVVTIIK;QLVTNAC[+57.0214635]LIK;QTVFYMEDYLTVK;TGEEIFGTIGMRPNAK;TGFSTSPESPYTHWK;VEDLTFTSPFC[+57.0214635]L…		6.62951	6.51631	6.68835	6.17648	6.12752	5.96211	6.02666	5.87682	6.03024	6.6207	6.43232	6.40232	6.15092	5.94584	6.05901	5.84669	5.27434	5.88278	6.58142	6.51593	6.7101	5.94796	5.99624	5.99326	5.76374	5.81799	5.85056
sp|Q9D880|TIM50_MOUSE	9	AQGPQHQPGSEGPSYAK;IPDEFDSDPILVQQLR;LEQEEQQR;QGLSFGSLASR;QMIIEPTSPC[+57.0214635]LLPDPLR;TIALNQVEDVR;TPEQVTEIANR;TVLEHYALEDDPLEAFK;VLLDLSAFLK		3.98417	4.14521	4.25296	4.21278	4.24356	4.36059	4.24915	4.3593	4.2434	4.13294	4.17663	4.45169	4.38038	4.20757	4.27826	4.52518	4.90797	4.55925	4.20225	4.32852	4.25415	4.36856	4.39789	4.60244	4.27928	4.34623	4.30157
sp|Q8VE18|SMG8_MOUSE	5	AEDEGDLDTNSWPAPNK;AVSVGEAGGAGDPGAAAGDSLR;FSLVNTVC[+57.0214635]DR;LDHINFPVFEPSTPDPAPAK;QASTVEYLPGMLHSNC[+57.0214635]PK		-1.16592	-1.24956	-0.843339	-1.80554	-1.95663	-1.69277	-1.66102	-1.45638	-1.957	-1.28856	-1.09557	-0.420855	-1.73822	-1.61735	-1.47458	-1.17651	-0.892893	-1.32033	-1.45817	-1.01998	-1.12712	-1.85419	-1.55169	-1.21645	-1.62929	-1.61178	-1.62863
sp|Q3THS6|METK2_MOUSE	18	AVVPAKYLDEDTIYHLQPSGR;DLDLKKPIYQR;DSFPWEVPK;DSFPWEVPKK;FVIGGPQGDAGLTGR;FVIGGPQGDAGLTGRK;HIGYDDSSK;IC[+57.0214635]DQISDAVLDAHLQQDPDAK;IIVDTYGGWGAHGGGAFSGK;KIIVDTYGGWGAHGGGAFSGK;NFDLRPGVIVR;NGTLPWLRPDSK;TAAYGHFGR;TC[+57.0214635]NVLVALEQQSPDIAQGVHLDR;TGMILLAGEITSR;TQVTVQYMQDR;VHTIVISVQHDEEVC[+57.0214635]LDEMR;YLDEDTIYHLQPSGR		6.92961	6.99078	6.96679	6.06174	5.97502	5.97196	5.37348	5.46314	5.33513	7.07017	7.04408	7.11009	6.12102	5.81893	5.82644	5.33126	5.6498	5.30386	7.12272	7.14857	7.09593	6.06345	6.17874	6.09735	5.2591	5.5128	5.45146
sp|Q61768|KINH_MOUSE	32	AAEMMASLLK;DEEINQQSQLVEK;DQDNMQAELNR;EVLQALEELAVNYDQK;FQGEDTVMIASKPYAFDR;FVC[+57.0214635]SPDEVMDTIDEGK;FVC[+57.0214635]SPDEVMDTIDEGKSNR;GGGSFVQNNQPVGLR;HVAVTNMNEHSSR;ILQDSLGGNC[+57.0214635]R;ISFLENNLEQLTK;KLHELTVMQDR;LFVQDLATR;LITDLQDQNQK;LQAENDASKEEVK;LYLVDLAGSEK;MEENEKELAAC[+57.0214635]QLR;NGETVPIDEQFDKEK;NTIQWLENELNR;QISSLRDEVEAK;QLDDKDEEINQQSQLVEK;QLEESVDSLGEELVQLR;QPEGTGMIDEEFTVAR;SAEVDSDDTG…		4.43506	4.43523	4.55799	4.50641	4.31953	4.37632	4.62116	4.5989	4.59895	4.37774	4.446	4.62096	4.51441	4.37776	4.38397	4.9438	5.13208	4.87086	4.57374	4.65739	4.59106	4.40681	4.41737	4.64062	4.55595	4.64753	4.69794
sp|Q8BU03|PWP2_MOUSE	11	AGQLLPVVQFLQK;C[+57.0214635]GNLNFTHDGNSVISPVGNR;DMSTWVFGAER;EGDFNNLTSAAYHK;FNIQYVLAVSK;FSNLLGTVYR;LLDVLSGHEGPVSGLC[+57.0214635]FNPMK;LWDMFDSWR;SVLHHFHFKGSVHSVSFSPDGR;VLEFLAASFEESR;WDNLIYYALSGHK		3.81755	3.95074	4.16455	2.45155	2.78556	2.7214	1.83784	2.03407	2.21232	3.8812	3.79107	4.05959	2.74383	2.61793	2.58831	1.76597	2.20362	2.16323	3.60425	3.77779	3.97675	2.57207	2.97108	2.67434	1.82597	2.04657	2.19524
sp|Q62093|SRSF2_MOUSE	3	DAEDAMDAMDGAVLDGR;DAEDAMDAMDGAVLDGRELR;YGRPPDSHHSR		4.54007	4.4331	4.43255	4.03129	3.84485	3.81739	3.90982	4.08258	3.79669	4.40687	4.49167	4.708	4.13193	3.89897	4.02335	4.20671	4.45228	4.0462	4.53272	4.66155	4.43006	4.0472	3.98687	4.50273	3.90395	4.06571	4.02843
sp|O88291|ZN326_MOUSE	10	DIMEGVTADDHMMK;ESVLTATSILNNPIVK;FGPYESYDSR;GAYQDFNGMDR;GENPFEIQDHPQDQQIEGDEEDEEK;MAFTC[+57.0214635]SFC[+57.0214635]K;MMQIFIKPGGAFIK;NQGGSSWEAPYSR;QQTLNHPEAYK;SMDSYLNQSYGMDNHSGGGGGSR		0.83636	0.787109	0.859616	1.43759	1.3845	1.34678	1.78477	1.6295	1.4819	0.888004	0.908199	1.12099	1.32795	1.39599	1.61517	1.41881	1.37375	1.19001	0.968717	0.986559	0.983898	0.990737	1.26386	1.86423	1.33721	1.33	1.33918
sp|Q9CRC8|LRC40_MOUSE	7	LATVPADFALLSSLLR;LDLSNNDISSLPC[+57.0214635]SLGNLHLK;LLPALTVLDIHDNQLTSLPSAIR;LQSLSDDLR;LSFISHELC[+57.0214635]LLQK;QATLIPDDLFDATK;TTLITSINFSK		1.03982	0.927034	1.12025	0.56282	0.515155	0.750431	0.447705	0.846024	0.579457	1.15674	1.25114	1.52102	0.132061	0.561684	0.631345	0.580759	1.26526	0.765704	1.47789	1.31212	1.34998	1.11347	0.402392	0.541474	0.892395	0.846063	0.824573
sp|Q9JKX4|AATF_MOUSE	9	DLDEEIFDDDDFYHQLLR;EADPEADPEEATR;KLEMEDYPSFMAK;LAPVSLLDTDKR;LLSFMAPIDHTAMSDDAR;NQIALWDQLLEGR;SILTQIDHIMMDK;SILTQIDHIMMDKER;TSSLDPNDQVAMGR		3.10577	3.16093	3.25739	1.50089	1.45267	1.32641	0.922106	1.01022	0.920809	3.02141	3.19469	3.50517	1.59228	1.4906	1.49587	1.29735	1.39037	0.98811	3.07408	3.18665	3.05239	1.55899	1.56748	1.61808	0.984285	1.02898	1.28006
sp|P32233|DRG1_MOUSE	12	DHTLEDEDVIQIVK;DKGGINLTATC[+57.0214635]PQSELDAETVK;GGGGGGPGEGFDVAK;GQLPDYTSPVVLPYSR;IAEIEAEMAR;IDQISIEELDIIYK;IGFVGFPSVGK;IIENELEGFGIR;IQLLDLPGIIEGAK;SDATADDLIDVVEGNR;VYIPC[+57.0214635]IYVLNK;WNFDDLLEK		4.42808	4.60123	4.62555	3.43224	3.50976	3.5332	3.28042	3.3541	3.30858	4.53766	4.54954	4.8015	3.37801	3.42111	3.39832	3.41178	3.69822	3.39839	4.55195	4.56705	4.6784	3.39024	3.556	3.70115	3.11846	3.15802	3.34312
sp|Q01320|TOP2A_MOUSE	52	AAIGC[+57.0214635]GIVESILNWVK;AKGEEQDFPVDLEDTIAPR;AQMC[+57.0214635]ADVLPSPR;AYDIAGSTK;DIVALMVR;DKVDETGNSLK;DSVPASPGVPAADFPAETEQSKPSK;EDLAVFIEELEVVEAK;EKQDEQVGLPGK;ENMTLQAK;EQVLEPMLNGTEK;EWLLGMLGAESSK;FLEEFITPIVK;GEEQDFPVDLEDTIAPR;GFQQISFVNSIATSK;HVDYVADQIVSK;IKSENVEGTPAEDGAEPGSLR;IYVPALIFGQLLTSSNYDDDEKK;KEWLLGMLGAESSK;KNYEDEDSLK;KYDTVLDILR;LDDANDAGSR;LLDGEEPLPMLPSYK;LQSSLTC[+57.0214635]NSMVLFDHVG…		8.2516	8.30974	8.40056	6.06014	6.00284	6.05058	4.91131	4.88942	4.86175	8.27392	8.31853	8.52223	6.08697	5.87847	5.88873	5.27455	5.42365	5.22858	8.34114	8.49672	8.46768	6.0357	6.10087	6.16403	5.03542	5.18447	5.11776
sp|Q9D0M3-2|CY1_MOUSE;sp|Q9D0M3|CY1_MOUSE	6	ALAEEVEVQDGPNDDGEMFMRPGK;GLLSSLDHTSIR;HGGEDYVFSLLTGYC[+57.0214635]EPPTGVSLR;HLVGVC[+57.0214635]YTEEEAK;MLLMMGLLLPLTYAMK;WASEPEHDHR		2.36256	2.47586	2.35857	2.61153	2.58776	2.4208	2.23852	2.41667	2.67564	2.41474	2.5256	2.24568	2.5288	2.58242	2.66176	2.42671	2.08016	2.39105	2.7515	2.37293	2.60887	2.9192	2.47607	2.1414	2.73854	2.54629	2.37546
sp|Q00612|G6PD1_MOUSE	18	DGLLPEDTFIVGYAR;DLQSSNQLSNHISSLFR;DNIAC[+57.0214635]VILTFK;DNIAC[+57.0214635]VILTFKEPFGTEGR;EMVQNLMVLR;GGYFDEFGIIR;GPTEADELMK;GPTEADELMKR;HLNSHMNALHQGMQANR;IIVEKPFGR;IYPTIWWLFR;KPGMFFNPEESELDLTYGNR;LFYLALPPTVYEAVTK;LILDVFC[+57.0214635]GSQMHFVR;NIQETC[+57.0214635]MSQTGWNR;NSYVAGQYDDAASYK;VGFQYEGTYK;WDGVPFILR		4.78656	4.90898	4.93081	4.07083	4.08646	4.09669	4.02424	3.98877	3.98568	4.68295	4.5895	4.71815	4.04519	3.8732	3.77549	4.21411	4.18043	4.32573	4.52961	4.47888	4.56577	4.08153	4.03004	3.76058	4.10391	3.87701	3.98865
sp|O55201|SPT5H_MOUSE	29	DMLEFPAQELR;DNELIGQTVR;DQREEELGEYYMK;DTYLDTQIVGQTGVIR;DVTNLTVGGFTPMSPR;EATGVLLSIDGEDGIIR;EEIEASNIDNVVLDEDR;EHNFQPGDNVEVC[+57.0214635]EGELINLQGK;FAVALDSDQNNIHVK;FEGDTGLIVR;FIAYQFTDTPLQIK;GYIYVEAYK;HEDLKDMLEFPAQELR;HLVLAGGSKPR;LGYWNQQMVPIK;LTTVDSQRPGGMTSTYGR;MDLEDQQIK;SFAMSAVITEGVKPTLSELEK;SLGGDVASDGDFLIFEGNR;SLGGDVASDGDFLIFEGNRYSR;SSEAEEAEVEEDQR;SVTGGMC[+57.0214635]SVYLK;TPAQSGAWDPNNPNTPSR;TPHYGSQ…		4.91642	4.82949	4.97251	4.45074	4.3465	4.35595	4.1424	4.19665	4.06867	4.81957	4.88649	5.09892	4.4753	4.27717	4.35035	4.26747	4.4126	4.28148	4.92597	4.99458	4.88142	4.45414	4.49836	4.67573	4.13032	4.17558	4.15842
sp|Q9CR16|PPID_MOUSE	16	AQEIAPGDKAIQAELLK;DGSGDSHPDFPEDADIDLK;EYDQALADLK;EYDQALADLKK;FEDENFHYK;GTGSTTGKPLHFK;HVVFGQVIK;ILLISEDLK;ILLISEDLKNIGNTFFK;IVLELFADIVPK;LC[+57.0214635]VIAEC[+57.0214635]GELK;LC[+57.0214635]VIAEC[+57.0214635]GELKEGDDWGIFPK;LQPIALSC[+57.0214635]VLNIGAC[+57.0214635]K;SQNWEMAIK;TLENVEVNGEKPAK;VFFDVDIGGER		6.6579	6.62676	6.58017	4.95616	4.76733	4.62007	4.2162	4.295	4.17822	6.47927	6.52402	6.51758	4.67718	4.63667	4.5435	4.14268	3.99419	4.02802	6.58001	6.49278	6.56317	4.78068	4.71034	4.71279	3.97107	4.24885	4.20816
sp|Q8K2F8|LS14A_MOUSE	2	DFDFESANAQFNKEEIDR;SFFDNISC[+57.0214635]DDNR		0.612633	0.18324	0.204431	-0.159296	-0.393038	-0.526966	-0.604731	-0.578173	-0.72151	0.490041	0.488066	0.0560457	-0.602794	-0.514867	-0.150889	-1.01721	-2.27369	-1.32477	0.289706	0.467227	0.46899	-0.345952	-0.76395	0.0651649	-0.810791	-0.888842	-0.616106
sp|Q60875-4|ARHG2_MOUSE;sp|Q60875-5|ARHG2_MOUSE;sp|Q60875|ARHG2_MOUSE	8	DFEADSWSLAVDSSFLQQHK;EALIC[+57.0214635]PTC[+57.0214635]NVTIHNR;GMFLISSGPPEMYEVHAASR;LGDLLISQFSGSNAEQMR;MQDIPEETESR;NVELFAEMVHFQALK;SVSTTNIAGHFNDESPLGLR;YIFTSLDKPSVVSLQNLIVR		0.857724	0.730642	0.826927	1.23667	0.896376	1.00427	0.961765	0.896224	0.86938	0.803842	0.990208	1.06397	0.848757	0.533815	0.567419	0.632577	0.379169	0.398479	0.993892	1.06082	1.03181	0.926042	0.594827	0.739741	0.66868	0.537318	0.733871
sp|Q99L45|IF2B_MOUSE	17	DASDDLDDLNFFNQK;DASDDLDDLNFFNQKK;DVDADEEDSR;DYTYEELLNR;EKNPDMVAGEK;EVEPEPTEEK;EVEPEPTEEKDVDADEEDSR;EYVTC[+57.0214635]HTC[+57.0214635]R;FPEEDEILEKDEALEDEDSK;IESDAQEPAEPEDDLDIMLGNKK;IFDIDEAEEAIK;IFDIDEAEEAIKDVK;KDDGISFSSQTAWAGSER;LYFLQC[+57.0214635]ETC[+57.0214635]HSR;SPDTILQKDTR;TSFVNFTDIC[+57.0214635]K;YIKEYVTC[+57.0214635]HTC[+57.0214635]R		5.33217	5.25282	5.12847	4.16061	4.13304	3.85984	3.76961	3.66883	3.81368	5.18705	5.19727	5.07956	4.04035	3.95485	4.29448	3.86147	3.51056	3.69193	5.42439	5.23297	5.34793	3.98406	3.9522	4.16702	3.81633	3.62395	3.34395
sp|P47757-2|CAPZB_MOUSE;sp|P47757-4|CAPZB_MOUSE	11	DYLLC[+57.0214635]DYNR;GC[+57.0214635]WDSIHVVEVQEK;KLEVEANNAFDQYR;LEVEANNAFDQYR;LTSTVMLWLQTNK;QMEKDETVSDC[+57.0214635]SPHIANIGR;SGSGTMNLGGSLTR;SPWSNKYDPPLEDGAMPSAR;STLNEIYFGK;SVQTFADK;YDPPLEDGAMPSAR		4.32569	4.25794	4.34939	4.65533	4.43711	4.4398	4.5056	4.55214	4.43969	4.33432	4.33632	4.47702	4.59835	4.47622	4.75949	4.8371	4.87711	4.80862	4.48854	4.47353	4.52689	4.56222	4.44819	4.73125	4.60169	4.43914	4.43962
sp|Q8VDR9|DOCK6_MOUSE	14	EHQEDPEMLMDLMYR;ELAFATEQDPPDAK;FGDDVVEIIKDSNPVDK;FGDLDEQEFVYKEPSITK;GLTC[+57.0214635]QVFEQDTPGDER;LAAEQFC[+57.0214635]TR;LASPEPLVAFSHLVLDK;LKETVLSEGTMEQELR;LVVRPPIIC[+57.0214635]GQMVNLGR;NLLFVYPHSLNFSSR;TGPEDVDDPQHC[+57.0214635]SGSPEDTPR;TLLSTEHAFPYIK;TTESGVPEDGQLDAQVR;YQHLSTAYSPITTETQR		1.29084	1.28833	1.58472	0.844981	1.06537	1.06474	0.483303	0.303961	0.493102	1.2545	1.27169	1.58112	0.969976	0.966218	1.14117	0.124784	0.436184	0.146462	0.833761	1.15584	1.12417	0.547822	1.00669	1.06839	0.052563	0.342753	0.439676
sp|P19157|GSTP1_MOUSE	4	EAAQMDMVNDGVEDLR;EAAQMDMVNDGVEDLRGK;YVTLIYTNYENGK;YVTLIYTNYENGKNDYVK		3.06066	2.79345	2.92721	3.45408	3.13181	3.32789	4.1787	4.44045	4.04568	3.36617	3.33498	3.42257	3.12525	3.29419	3.54935	4.68927	4.48873	4.59348	3.57009	3.5826	3.28735	3.84222	3.36771	3.88302	4.66956	4.37271	4.31168
sp|Q61510|TRI25_MOUSE	16	ASAAQPDSVGVK;AVIDAAETSSLR;AVIDAAETSSLRK;FDTIYQVLVK;FSASSAATQVAC[+57.0214635]DHC[+57.0214635]LTEIAVK;FTYC[+57.0214635]SQVLGLHC[+57.0214635]YK;IDLDHDLIMGIYQGAADLK;LTIMHSHINGATK;NNFC[+57.0214635]GVGIC[+57.0214635]YGSMER;NPNSWC[+57.0214635]VEWFNNK;NTVMC[+57.0214635]AVVEQFLQAEQAR;QQC[+57.0214635]VQDSMK;TC[+57.0214635]SPTTLSQASADLEYK;TELLEYFVK;TPVDDWTPPAR;YTTASVSDGLQHYR		3.96602	3.92598	4.07486	2.9024	2.9115	2.65521	2.92558	3.01614	2.9254	3.97807	3.93119	3.95664	3.04182	2.90123	2.96859	3.03897	2.80957	3.11379	4.01997	4.04436	4.1799	2.68781	3.00811	2.82513	2.79583	2.80528	2.71869
sp|Q8VDQ9|KRI1_MOUSE	6	AQEEVDYLEWLK;FEEPDSASVK;SEQEEMQEQR;SLC[+57.0214635]QEEMEMSTEATGK;TPQAETLVSK;TVVPC[+57.0214635]DFGLSTEEILSADDKELNR		0.0477719	0.122872	0.281897	-0.71733	-0.791129	-1.44929	-1.03188	-0.460175	-0.558161	0.126245	0.0900338	0.37277	-0.790049	-0.60232	-0.456486	-0.357295	-0.39937	-0.342929	0.174048	-0.405959	0.199833	-0.60511	-0.682373	-0.319878	-0.633879	-0.740057	-0.76718
sp|Q9JIX8-4|ACINU_MOUSE;sp|Q9JIX8|ACINU_MOUSE	15	AAPC[+57.0214635]IYWLPLTESQIVQK;ETQIVSLPQEENEVK;FLC[+57.0214635]ADYAEQDELDYHR;GLLVDRPSETK;GVQAGNSDTEGGQPGR;GVQAGNSDTEGGQPGRK;QFEDEEGEER;SGVSITIDDPVR;SHC[+57.0214635]FVTYSTVEEAVATR;SLIPDIKPLAGQEAVVDLHADDSR;SLSPLSGTTDTKAESPAGR;TGTLVEEAFWIDKIK;TVTQVVPAEGQENGQR;VSDESVLPLAQK;WGASTAATQK		3.87963	3.74413	3.64838	3.45302	3.18402	3.0996	3.14004	3.13893	2.99997	3.55115	3.6599	3.75527	3.37157	3.18113	3.24021	3.21941	3.36386	3.09042	3.68539	3.6269	3.66722	3.25822	3.14078	3.63806	2.90416	3.00566	3.01994
sp|P56399|UBP5_MOUSE	24	DGLGGLPDIVR;DLGYIYFYQR;DRVTSAVEALLSADSASR;EEDTSAGTGDPPR;EELLEYEEK;ENLWLNLTDGSILC[+57.0214635]GR;FASFPDYLVIQIK;FTFGLDWVPK;GHPEFSTNR;IFQNAPTDPTQDFSTQVAK;IGEWELIQESGVPLKPLFGPGYTGIR;IVILPDYLEIAR;KLDVSIEMPEELDISQLR;KQEVQAWDGEVR;LGHGLLSGEYSKPALESGDGEQVPEQK;QQDAQEFFLHLINMVER;SAAESISESVPVGPK;SSENPNEVFR;TMTELEIDMNQR;VC[+57.0214635]ASEKPPK;VDYIMQLPVPMDAALNK;VTSAVEALLSADSASR;WVIYNDQK;YFDGSGGNNHAVEHYR		5.59678	5.54716	5.66088	5.60189	5.43226	5.51558	5.6459	5.69677	5.56793	5.6345	5.62137	5.8099	5.58558	5.41074	5.23086	5.71679	5.85705	5.77016	5.62129	5.68516	5.67097	5.5302	5.50412	5.341	5.47771	5.67426	5.70419
sp|Q8K297|GT251_MOUSE	13	AAYSNFWC[+57.0214635]GMTSQGYYKR;ALHEQEIDC[+57.0214635]QLVEAVDGK;EGLDWDLIYVGR;EVYGFLPVPLR;GC[+57.0214635]FAVPMVHSTFLIDLR;GELGC[+57.0214635]FLSHYNIWK;GLYHSVEWRPAEEPSSYPDEEGPK;MGFDEVFMINLK;MLPVDEFLPVMFDK;NAAPALPATLGALEQLR;NSDVLQSPLDSTAR;NSDVLQSPLDSTARDEL;QAEVQMYVC[+57.0214635]NK		2.52775	2.50714	2.65631	3.26572	3.12743	3.03724	3.72777	3.70099	3.86723	2.74584	2.67888	2.98556	3.50788	3.46966	3.62769	5.02557	4.89766	5.24027	2.79605	2.65712	2.74544	3.26466	3.00454	3.15075	4.17659	3.8356	3.70978
sp|P27612|PLAP_MOUSE	25	DFVTTAEDR;DTVC[+57.0214635]SLSSGK;EALTFDQANPTQILGK;ELSQATIDSK;ESLMSHAIELK;FGTLLSGSWDTTAK;GLAILSETEFLSC[+57.0214635]ANDASIRR;GQTLGLGNTSFSDPFTGGGR;HGEC[+57.0214635]AQTIR;HPNVNENFC[+57.0214635]NEK;IGDVVGSSGANQQTSGK;ILPEQGLMLTGSADK;ILSLIC[+57.0214635]NNSSEKPTAQQLQILWK;KEALTFDQANPTQILGK;LKELNGTAPEEK;LSC[+57.0214635]SLPGHELDVR;LWAPDSPNR;NDLNPMFLDQVAK;TFC[+57.0214635]NC[+57.0214635]FVSQAGQK;TGDLGDINAEQL…		5.47712	5.42501	5.47151	4.77954	4.68423	4.71738	4.66018	4.75809	4.60719	5.3812	5.47721	5.57804	4.83529	4.54905	4.70905	4.80394	4.88423	4.86716	5.51804	5.55322	5.52939	4.69331	4.76517	5.00942	4.5607	4.59702	4.61977
sp|Q3TLD5|RMP_MOUSE	4	EVPSEVSEEPTKR;STSSEEAVATEAGGSSLDELQENHPK;TSDIFEADFENGVKPK;VDNDYSALQER		-0.529229	-1.10841	-1.03371	-2.30917	-3.12555	-2.90677	-3.741	-3.37735	-3.80481	-1.29725	-1.07443	-0.466063	-3.03727	-2.84958	-2.82208	-3.26234	-3.82357	-4.06414	-0.445872	-0.83711	-1.18198	-2.41705	-3.66715	-2.03238	-3.77966	-3.71188	-2.86959
sp|Q8CI51|PDLI5_MOUSE	11	AC[+57.0214635]TGSLNMTLQR;DFNMPLTISSLK;EVVKPVPITSPAVSK;FFAPEC[+57.0214635]GR;IGDVVLSIDGISAQGMTHLEAQNK;ILAQITGTEHLTESENDNTK;NTEFYHIPTHSDASK;SAAAFKPVGSTSVK;SPSWQRPNQAAPSTGR;SSGTGASVGPPQPSDQDTLVQR;TPMC[+57.0214635]AHC[+57.0214635]NQVIR		2.13649	2.01995	2.10448	1.8799	1.63795	1.58472	1.73253	1.69048	1.54535	1.95906	1.96173	2.09799	1.73569	1.45871	1.48971	1.76924	1.58324	1.71966	2.08018	2.09956	2.12977	1.79857	1.76366	1.99501	1.82551	1.57323	1.46004
sp|Q8VE37|RCC1_MOUSE	11	DNNGVIGLLEPMKK;DTSVEGSEMVPGK;DTSVEGSEMVPGKVELQEK;LGLGEGAEEK;LPVVSSVAC[+57.0214635]GASVGYAVSK;SHNTEPGLVLTLGQGDVGQLGLGESVLER;SMVPVQVQLDAPVVK;SWVGFSGGQHHTVC[+57.0214635]MDSEGK;VFLWGSFR;VVLTVSSGGQHTVLLVK;VVQVSAGDSHTAALTEDGR		5.71062	5.65325	5.74106	5.25105	5.10501	5.14994	4.51598	4.4968	4.48329	5.64088	5.68866	5.86711	5.29844	5.13833	5.02674	4.6528	4.99585	4.7537	5.615	5.67974	5.5169	5.22206	5.31376	5.27634	4.51712	4.68546	4.59778
sp|Q922B2|SYDC_MOUSE	26	ADDVVWVR;ATVNQDTR;EAGVEMDDEEDLSTPNEKLLGR;EIVDAAEDYAK;EIVDAAEDYAKER;ESIIDVEGVVR;FAANINKESIIDVEGVVR;FGAPPHAGGGIGLER;FQTEIQTVSK;GEEILSGAQR;IGSC[+57.0214635]TQQDVELHVQK;IHDPQLLTER;IISAASEGGANVFTVSYFK;IYVISLAEPR;LEYC[+57.0214635]EALAMLR;LPLQLDDAIRPEVEGEEDGR;LQSGIC[+57.0214635]HLFR;NNAYLAQSPQLYK;QMC[+57.0214635]IC[+57.0214635]ADFEK;QQQFNVQALVAVGDHASK;QSNSYDMFMR;QSNSYDMFMRGEEILSGAQR;TSTSQAIFR;VFC[+57.02…		7.02472	7.09215	7.11381	6.52268	6.51672	6.44958	6.25663	6.30261	6.35122	7.04392	7.08623	7.05041	6.50378	6.36642	6.49904	6.09271	6.09514	6.08596	7.15049	7.17373	7.19132	6.52262	6.58188	6.63283	6.17066	6.38898	6.34056
sp|Q8BH50-2|CR025_MOUSE;sp|Q8BH50|CR025_MOUSE	1	DSSESQLASTESDKPTTGR		-1.60324	-1.55939	-1.72474	-2.44866	-2.62369	-2.62955	-3.63313	-3.64097	-3.75998	-1.97151	-1.93901	-1.51678	-2.51064	-2.88609	-3.0745	-4.23594	-3.34642	-3.79988	-1.6038	-1.46221	-1.82667	-2.86086	-2.8511	-2.36762	-3.73041	-3.6272	-3.3223
sp|P61971|NTF2_MOUSE	4	ADEDPIMGFHQMFLLK;IQHSITAQDHQPTPDSC[+57.0214635]IISMVVGQLK;LSSLPFQK;NINDAWVC[+57.0214635]TNDMFR		3.98232	4.16062	4.09048	3.83475	3.73513	3.57135	3.45322	3.44109	3.53592	3.9254	3.67526	3.65751	3.73109	3.49008	3.59676	3.52733	3.44341	3.35861	3.93819	3.95009	4.14919	3.7245	3.74341	3.70309	3.3067	3.25525	3.34482
sp|Q6WKZ8-2|UBR2_MOUSE;sp|Q6WKZ8|UBR2_MOUSE	17	ALSWLGSVIGYSDGLR;DC[+57.0214635]AVDPTC[+57.0214635]VLC[+57.0214635]MEC[+57.0214635]FLGSIHR;EAPSGWHLWR;FLQGFDAFLELLK;FNPGVGQVAATDEIK;FPELLPLSELSPPMLIEHPLR;GMYELKPEC[+57.0214635]AK;IMAQMSEMQR;LEQANKPSHLC[+57.0214635]GR;MLLTEENLMTVIIK;NGFSLVNQIYYYHNVK;SLLEC[+57.0214635]SAEEIAGR;SLPEDENKETGMESVIESVAHFK;TYNIFAIMFR;VGEPTYSC[+57.0214635]R;YGDFQYC[+57.0214635]DQAK;YVLISKPTEWSDELR		1.70122	1.69949	1.84782	1.96589	1.74109	1.84832	1.93357	1.80173	1.82153	1.78964	1.6409	1.5573	2.12604	1.80018	1.5647	2.07803	1.93563	2.09953	1.55539	1.59364	1.73118	1.7492	1.86352	1.36012	1.84224	1.93044	1.92754
sp|Q62523|ZYX_MOUSE	6	C[+57.0214635]NTC[+57.0214635]GQPITDR;C[+57.0214635]SVC[+57.0214635]SEPIMPEPGRDETVR;EVEELEQLTQQLMQDMEHPQR;FSPGAPSGPGPQPNQK;QSVAVNESC[+57.0214635]GK;VNPFRPGDSEPPVAAGAQR		0.160764	-0.169578	0.366824	1.64329	1.08166	1.36694	1.13323	1.18477	1.16397	-0.229199	-0.169939	0.0349622	1.1819	1.32724	1.12173	2.01277	2.16831	1.98317	-0.787155	-0.484147	-0.274624	1.17161	0.941321	1.54668	1.32457	1.26322	1.06208
sp|P36536|SAR1A_MOUSE	3	ELNARPMEVFMC[+57.0214635]SVLK;NYLPAINGIVFLVDC[+57.0214635]ADHSR;VELNALMTDETISNVPILILGNKIDR		1.24051	1.86967	1.81399	1.92792	1.98836	1.77786	1.71379	1.62228	1.89133	1.42965	1.12799	0.0673683	2.03588	1.95027	0.485036	2.265	2.29756	2.28118	0.834356	1.18096	1.6188	1.7185	2.07295	-1.48513	1.23512	2.08354	2.07614
sp|Q99MD9|NASP_MOUSE	40	AEETPNESVLEK;AELVPEQEEAMLPVEESEAAGDGVETK;AKQEPEVNGGSGDAVSSGK;ATLVESSTSGFTPSGAGASVSMIASR;DGSSVEEVK;DQVATSESELGK;EAAIPGLNEDEVASGK;EAAIPGLNEDEVASGKTEQESLC[+57.0214635]TEK;EAEGSFTEYEK;EAEGSFTEYEKEIEELK;EAQLYAAQAHLK;EDMDISEPEEK;EFRETVEEGEEIISLEK;ENDKAEETPNESVLEK;EQVYDAMGEK;ESQRSGNVAELALK;ETSEDQPIR;ETSEDQPIRAAEK;ETVEEGEEIISLEK;GGREDMDISEPEEK;HLVMGDIPAAVNAFQEAASLLGK;HLVMGDIPAAVNAFQEAASLLGKK;IEDAPAPSTSAD…		8.24416	8.1018	7.97843	7.2517	6.88083	6.94019	6.26329	6.22821	6.14643	8.01974	8.24093	8.38323	7.05842	6.84827	6.83854	5.99107	5.9388	5.64803	8.27789	8.14501	7.98619	7.22282	6.79315	7.29028	6.07485	6.2959	6.35183
sp|Q91YL2|RN126_MOUSE	4	C[+57.0214635]ESGFIEELPEETR;IQALPTVPVTEEHVGSGLEC[+57.0214635]PVC[+57.0214635]K;NTENGSAPSTAPTDQNR;YFC[+57.0214635]HC[+57.0214635]C[+57.0214635]SVEIVPR		-0.457671	-1.00379	-0.677566	-0.920966	-1.61849	-1.10494	-1.61193	-1.71292	-1.54862	-0.61806	-0.730073	-1.19887	-1.68681	-1.43785	-1.38487	-2.06078	-1.64118	-1.74716	-0.569471	-0.239595	-0.759833	-1.09004	-1.36574	-0.81694	-1.6415	-1.6297	-1.73535
sp|Q923E4|SIR1_MOUSE	4	EAPATAVAGDGDNGSGLR;ILQC[+57.0214635]HGSFATASC[+57.0214635]LIC[+57.0214635]K;NVENINVENPDFK;NYTQNIDTLEQVAGIQR		1.28914	1.13909	1.3542	-0.073719	-0.515261	-0.54413	-1.13008	-1.26857	-1.14319	1.35674	1.35384	1.58691	-0.0796948	-0.246733	-0.198514	-1.18997	-1.50094	-1.51453	1.834	1.77155	1.92885	-0.143919	-0.346606	0.0408795	-1.25154	-1.29949	-1.14872
sp|Q8BJ71|NUP93_MOUSE	24	ALITFAGMIPYR;C[+57.0214635]DITDNQSEVADK;C[+57.0214635]DITDNQSEVADKTEDYLWLK;C[+57.0214635]GDLLAASQVVSR;DNALLSAIEESR;EALQYFYFLR;EFDMILGKLENDGSR;ESMLVEWEQVK;FTSDTKPIINK;GLDISHISQR;LESLSAATTFEPLEPVKDTDIQGFLK;LLSPVVPQISAPQSNK;LNQVC[+57.0214635]FDDDGTSSPQDR;LNQVC[+57.0214635]FDDDGTSSPQDRLTLSQFQK;LVPLNQESVEER;NLQEIQQAGER;NMALSIAER;NYTLVTVFGNLHQAQLGGVPGTYQLVR;QMTDVVLTPATDALK;SISDMWAMVK;SSLDSIEMAYAR;TFGMA…		5.1008	5.09335	5.08596	4.85104	4.71896	4.80133	4.60992	4.63329	4.67869	5.12273	5.20333	5.27023	4.63934	4.64194	4.79108	4.71087	4.58904	4.68134	5.32446	5.25692	5.22956	5.05077	4.71314	5.00129	4.91759	4.73361	4.64062
sp|Q14AX6-3|CDK12_MOUSE;sp|Q14AX6|CDK12_MOUSE	4	C[+57.0214635]SNILLNNSGQIK;C[+57.0214635]TAEQTLQSDFLK;C[+57.0214635]TAEQTLQSDFLKDVELSK;STPDTELVTVAHSNPEVK		-2.06113	-1.73619	-1.51924	-2.7532	-2.75394	-2.79915	-3.4308	-4.02771	-2.85024	-2.09514	-1.19052	-3.2176	-3.17419	-2.81787	-2.75061	-3.52927	-4.30273	-3.47041	-2.25119	-2.30994	-2.14639	-3.10749	-2.65758	-2.33736	-3.68715	-3.22689	-3.91895
sp|O08583|THOC4_MOUSE	7	LLVSNLDFGVSDADIQELFAEFGTLKK;MDMSLDDIIK;QLPDKWQHDLFDSGFGGGAGVETGGK;QQLSAEELDAQLDAYNAR;QYNGVPLDGRPMNIQLVTSQIDTQR;SLGTADVHFER;WQHDLFDSGFGGGAGVETGGK		4.17884	4.25353	4.2384	4.03825	3.67842	3.85207	3.49012	3.83369	3.56601	4.15248	4.33642	4.35818	3.79453	3.81442	3.84643	3.85791	4.12401	3.84731	4.38259	4.60884	4.4351	4.0929	3.68184	4.05112	3.48531	3.82869	3.77392
sp|P51174|ACADL_MOUSE	11	AQDTAELFFEDVR;C[+57.0214635]IGAIAMTEPGAGSDLQGVR;GFYYLMQELPQER;IFSSEHDIFR;LPANALLGEENK;LPANALLGEENKGFYYLMQELPQER;QGLLGINIAEK;SGSDWILNGSK;TVAHIQTVQHK;VQPIYGGTNEIMK;VQPIYGGTNEIMKELIAR		1.87631	1.87841	2.04556	2.92633	2.88	2.88603	3.96921	4.05049	3.88199	1.89362	1.88573	2.03869	3.3699	3.33706	3.51075	4.46525	4.52154	4.66465	1.74715	1.67648	1.60724	2.83901	3.0319	3.13995	4.28124	4.08538	3.92576
sp|Q8VE73-3|CUL7_MOUSE;sp|Q8VE73|CUL7_MOUSE	10	DYAVILNQLGAR;FLTASWKDDDFVPR;GLEVLGPKPTFWPVFR;GTINHYTNFYSK;GVPYASC[+57.0214635]TDNHTFSTFR;LHIVDLLQDHLEEER;MLENYEEIAAGDEGQFR;NLLNC[+57.0214635]LVVR;RGNVWLIPPQTYLQAEAEEGR;VPLGPGLHAYPDELIR		0.115681	0.116008	0.179952	1.29109	1.36312	1.22929	1.59637	1.33704	1.61286	0.113807	0.691364	0.506364	1.27283	1.16285	1.14189	1.68632	1.48314	1.45359	0.970024	0.346849	0.711759	1.02775	1.27796	0.74899	1.37823	1.25906	1.46876
sp|P58252|EF2_MOUSE	51	ALLELQLEPEELYQTFQR;ARPFPDGLAEDIDKGEVSAR;AYLPVNESFGFTADLR;C[+57.0214635]ELLYEGPPDDEAAMGIK;C[+57.0214635]LYASVLTAQPR;DGSGFLINLIDSPGHVDFSSEVTAALR;DLEEDHAC[+57.0214635]IPIK;DLEEDHAC[+57.0214635]IPIKK;DSVVAGFQWATK;EDLYLKPIQR;EGALC[+57.0214635]EENMR;EGIPALDNFLDK;EGIPALDNFLDKL;ETVSEESNVLC[+57.0214635]LSK;ETVSEESNVLC[+57.0214635]LSKSPNK;FAAKGEGQLSAAER;FDVHDVTLHADAIHR;GHVFEESQVAGTPMFVVK;GPLMMYISK;GVQYLNEI…		9.96994	10.0791	10.0903	9.50127	9.54649	9.39848	9.14021	9.00909	9.08262	10.0401	9.93251	9.78391	9.65189	9.41008	9.23346	9.54443	9.62144	9.4746	9.92586	9.98249	10.0992	9.36149	9.65487	9.30485	8.96105	9.07241	9.05935
sp|O88844|IDHC_MOUSE	22	AKLDNNTELSFFAK;ALEDVC[+57.0214635]IETIEAGFMTK;ATDFVVPGPGK;ATDFVVPGPGKVEITYTPK;C[+57.0214635]ATITPDEKR;DATNDQVTK;GQETSTNPIASIFAWSR;GWPLYLSTK;HAYGDQYR;IQGGSVVEMQGDEMTR;KIQGGSVVEMQGDEMTR;LDNNTELSFFAK;LIDDMVAQAMK;LIDDMVAQAMKSEGGFIWAC[+57.0214635]K;LILPYVELDLHSYDLGIENR;LVTGWVKPIIIGR;SDYLNTFEFMDK;SDYLNTFEFMDKLGENLK;SEGGFIWAC[+57.0214635]K;SIEDFAHSSFQMALSK;TVEAEAAHGTVTR;VTYMVHDFEEGGGVAMGMYNQDK		4.21582	4.23708	4.24903	5.59076	5.5436	5.5267	5.38715	5.45504	5.32359	4.36803	4.30199	4.37945	5.90321	5.6817	5.54323	5.73579	6.06724	5.77525	4.16711	4.33088	4.21184	5.51048	5.6109	5.37698	5.21995	5.33826	5.36126
sp|Q9R1T2|SAE1_MOUSE	15	AKLDSSETTMVK;AQNLNPMVDVK;DPPHNNFFFFDGMK;DPTSESYKEDAELLLQIR;EALEVDWSGEK;FDAVC[+57.0214635]LTC[+57.0214635]C[+57.0214635]SR;GLTMLDHEQVSPEDPGAQFLIQTGSVGR;GSGIVEC[+57.0214635]LGPQ;LDSSETTMVK;NDVFDSLGISPDLLPDDFVR;TAPDYFLLQVLLK;VDTEDVEKKPESFFTK;VLFC[+57.0214635]PVKEALEVDWSGEK;VSQGVEDGPEAK;VSQGVEDGPEAKR		5.73179	5.68093	5.75747	5.14528	5.12704	4.97088	4.78617	4.78457	4.82285	5.559	5.5006	5.4511	5.17676	5.00579	5.08188	4.80254	4.77276	4.74913	5.45754	5.55505	5.65027	4.91415	5.08005	5.0973	4.53084	4.68121	4.6664
sp|Q571H0|NPA1P_MOUSE	14	AAAYYVLAAYYSHLEGAR;ASEFVQEASTLQASMGK;AYEQNNLSLISFR;DMWLGAQQPDTFLAHIR;ELELWLEHLDSTAEER;ETLLDLMSTVVR;EVTLALLALPEAHLLTQQGTQSLGK;GLGALLPTLAEHELDTVFLQTLQK;IMFTQALNLDSIPVK;ISTINILLSTLK;NVDSSAQC[+57.0214635]LTR;SVFYLLMK;SVGPALLQSLLGLLK;TIEELLLAILK		1.95293	2.04073	2.26204	0.545429	0.875977	0.737809	0.362771	0.130619	0.104205	1.93588	1.8795	1.82668	0.655706	0.514095	0.25986	0.434462	0.0626741	0.128335	1.77056	1.71256	2.07176	0.623248	0.679896	0.0246079	0.190609	0.261151	0.154426
sp|Q68FH4|GALK2_MOUSE	5	AATSHFNVR;LGISLEEMLLVTEDALHPEPYSR;QVC[+57.0214635]EDAPDNAVQLLGELMNQSHR;TKPLWHNYFLC[+57.0214635]GFK;TQILTPNTQDELTFK		-0.322798	-0.177879	-0.00899803	0.342425	0.201411	0.427853	1.48648	1.51719	1.38601	-0.201887	-0.148513	0.0321093	0.569267	0.541564	0.668778	1.81291	1.91285	1.87556	-0.0933678	0.220112	0.114215	0.143997	0.221033	0.332184	1.15413	1.28391	1.24982
sp|Q99J45|NRBP_MOUSE	5	AVFDNLIQLEHLNIVK;ELLFHPALFEVPSLK;EPVQTLYSQSPALELDKFLEDVR;LTSLLEETLNK;LTSLLEETLNKFNFTR		-0.169903	0.165279	0.35149	0.343264	0.660014	0.713556	0.201048	0.84026	0.827522	-0.0309121	0.188797	0.354536	0.482709	0.40432	0.168131	0.491626	1.36043	0.995138	0.00822228	0.271172	0.305157	0.460586	0.55245	-0.222307	0.353282	0.794422	0.979349
sp|Q9JLI8|SART3_MOUSE	18	ALEYLQQEVEER;ALSSVGLHMTK;ALVENC[+57.0214635]LVPDLWIR;EAALVQQEEEK;EAALVQQEEEKAEQR;EFESAIVEAAR;ELWDSIMTR;FSESGDPSC[+57.0214635]LIMQSWAR;GYC[+57.0214635]YVEFGEEK;KVLSGAVAAEAAEAK;LEEQLSINGYDYNC[+57.0214635]HVELIR;SAQQALELDR;TENSLASGEASAMKEETELSGK;VAISNPPQR;VKDLVLSVHSR;VLSGAVAAEAAEAK;YANMWLEYYNLER;YKPYEEALLQAEAPR		4.06293	4.0184	4.16634	3.71964	3.63065	3.6521	3.64034	3.64215	3.64071	4.0431	3.94914	4.03552	3.77333	3.56224	3.59185	3.62995	3.60639	3.62364	3.95434	4.06413	4.1431	3.64388	3.73882	3.8409	3.42484	3.52511	3.62255
sp|Q6NS46|RRP5_MOUSE	47	AFLC[+57.0214635]LSLIGPYR;AFNAEAFKPGSTHK;AGQEVEPGQK;AIFENTLSTYPK;C[+57.0214635]VLPSSVIIGLGPSVLGLAK;C[+57.0214635]VVSSLDVTESGKK;DPGVESSQKK;ELYNGC[+57.0214635]LPEGK;EYGVFVQFPSGLSGLSPK;FAQLEFQLGDVER;FEILSLESLC[+57.0214635]EGMR;FQVGQAIEATVVDPDVPR;FVLTILELSVRPSELK;FVTTPSEHFVEGQTVVAK;GLTVSFPFGK;GLVDFMHLEPK;GLVPSMHLADIMMK;GSYSALNTHSESPVEK;GTVLAIKPFGILVK;IEDPEINSIEDVK;IEDPEINSIEDVKEGQLLR;IEEALMDPGR;IEEAL…		6.11128	6.14694	6.26161	4.89602	5.00531	4.90719	4.26544	4.23055	4.33343	6.11177	6.04242	6.09876	5.06483	4.98306	4.96779	4.37139	4.37074	4.4514	5.98982	6.04218	6.14004	4.93456	5.17212	5.18431	4.4125	4.46556	4.36428
sp|P70404|IDHG1_MOUSE	7	ENTEGEYSSLEHESVAGVVESLK;HAC[+57.0214635]VPVDFEEVHVSSNADEEDIR;HKDIDILIVR;HTVTMIPGDGIGPELMLHVK;LGDGLFLQC[+57.0214635]C[+57.0214635]R;NIANPTATLLASC[+57.0214635]MMLDHLK;TSLDLYANVIHC[+57.0214635]K		1.79163	1.9158	1.86409	1.22895	1.85306	1.22368	1.45654	1.35238	1.58703	1.72594	1.55177	1.56936	1.5908	1.73046	2.11129	1.65402	1.68605	1.29907	1.56936	1.72371	2.03699	1.38149	1.75639	1.90033	1.42997	1.23329	1.2226
sp|Q8BH74|NU107_MOUSE	19	AGMTEEAQR;EDAEDDPER;EDDPGEAASMSMFSDFLHSFLK;FLILGDVDGLMDEFSK;GHLDALTADVK;HMNSAPQKPTLLSQATFTEK;IDVIDWLVFDPAQR;KYEMDHNIWK;LGLYTNTEHHSMTEDVNLSTVMLR;MVVETLFQR;SGFGGMSSPVIR;SVYWENTLHSLK;TASMLWLLQQEMVTWR;TPSSFRQPFVTPSSR;TSVMTQDDSEELPR;VFEELQATDK;VLEENQEHYHIVQK;VLIQANQEDNFGTATPR;VMVDSLVEQEIR		4.15016	4.18345	4.0995	3.77146	3.73793	3.74319	3.43009	3.39547	3.41008	4.15236	4.2053	4.2616	3.71453	3.68706	3.55543	3.62492	3.65597	3.53374	4.21578	4.25099	4.11884	3.91788	3.78037	3.79827	3.66227	3.69698	3.60019
sp|Q91V76|CK054_MOUSE	5	AHIMPAEFSSC[+57.0214635]PLNSDEAVNK;APLVC[+57.0214635]LPVFVSK;IAEVGGVPYLLPLVNK;QTLEEHYGDKPVGMGGTFIVQK;TGELNFVSC[+57.0214635]MR		0.236968	0.2367	0.347732	0.947046	1.3189	1.08239	2.13734	2.13475	2.27347	0.104653	-0.149828	-0.0334087	1.1844	1.22467	1.56586	1.78042	1.87294	1.65452	-0.440341	0.0537502	0.185298	0.798149	1.30067	1.53647	1.62311	1.78366	2.01796
sp|Q9ET30|TM9S3_MOUSE	7	DLGDEYGWK;EEEMDDMDR;FKDDVMPGTYC[+57.0214635]EIDLDK;KLEIGFNGNR;YFSLPFC[+57.0214635]VGSK;YLDPSFFQHR;YSKEEEMDDMDR		1.41926	1.44789	1.47681	2.4145	2.47853	2.43833	3.60277	3.6	3.50293	1.49311	1.34674	1.30308	2.86354	2.49184	2.81358	4.14419	4.21202	4.26006	0.995544	1.25601	1.53016	2.39174	2.59899	2.50493	3.57289	3.26437	3.15902
sp|Q60520-1|SIN3A_MOUSE;sp|Q60520|SIN3A_MOUSE	17	AELVQLVSPFLGK;AFLEILHTYQK;DKSDSPAIQLR;EHLAQKPVFLPR;HGVGTESLFFDK;HSGTGATPPVK;KNPSIAVPIVLK;LDDQESPVYAAQQR;LDNTLGGTSEVIHR;QEQATEENAGVPVGPHLSLAYEDK;QILEDAAALIIHHVK;SAEAYENFLR;SLLDGNIDSSQYEDSLR;SLLNEIESIYDER;SQSIDTPGVISR;TMENVESLDKLEC[+57.0214635]R;YMSSDTTSPELR		3.37692	3.13699	3.3186	2.1793	2.1824	2.16417	1.9042	1.7491	1.84684	3.2089	3.34231	3.47482	2.43999	2.07206	2.39798	1.86647	1.69876	1.78467	3.42427	3.39008	3.38497	2.46157	2.12414	2.4859	2.02247	1.69749	1.83995
sp|Q8VCB1|NDC1_MOUSE	8	ITTTFGEHLNAVQASAEHQK;LQQFLEFKE;LSSAEETAFQTPKPSQTPSVPPLVK;LVLYQEAAATNGR;LWTHTSDQQVSAISNPSPC[+57.0214635]ASVTAEGK;MAGILDVNPFSGSPQSPQLIR;VLIMYFFSK;YLALQDLMLLSQYSPSR		0.912032	0.998323	1.02409	1.03074	0.718209	0.963334	0.604286	0.54857	0.640672	0.937373	0.996696	1.18338	1.13403	0.8943	0.684474	0.851094	1.12455	0.870872	1.0435	1.23382	1.13847	1.24326	1.05882	1.1219	0.840652	1.08873	0.960241
sp|P28798|GRN_MOUSE	6	C[+57.0214635]DMEVSC[+57.0214635]PEGYTC[+57.0214635]C[+57.0214635]R;EVKC[+57.0214635]DMEVSC[+57.0214635]PEGYTC[+57.0214635]C[+57.0214635]R;GTC[+57.0214635]EMGILQVPWMK;LNTGAWGC[+57.0214635]C[+57.0214635]PFAK;TQC[+57.0214635]PDDSTC[+57.0214635]C[+57.0214635]ELPTGK;VHC[+57.0214635]C[+57.0214635]PHGASC[+57.0214635]DLVHTR		-2.21855	-2.4967	-2.28824	1.67662	0.0653032	0.869875	2.25358	1.66559	1.77677	-2.69104	-2.94648	-2.56077	1.49597	0.438912	0.355971	2.09269	2.01759	1.25017	-2.25472	-2.04946	-2.14453	0.918859	0.531051	1.52714	1.72423	1.62942	1.69006
sp|Q8C878|UBA3_MOUSE	9	AEVAAEFLNDR;AEVAAEFLNDRVPNC[+57.0214635]NVVPHFNK;EQPFGDGVPLDGDDPEHIQWIFQK;IQDFNDTFYR;LQEVLDYLTNSASLQMK;MAVDGGC[+57.0214635]GDTGDWEGR;QIHVIDMDTIDVSNLNR;TLYLQSVTSIEER;VLVIGAGGLGC[+57.0214635]ELLK		3.05945	3.02259	3.16695	2.99752	2.94018	2.66142	3.01973	2.94797	3.06231	2.99384	2.88479	2.77315	2.98345	2.77623	2.91273	2.8241	2.41586	2.89052	2.86613	2.80151	3.0314	2.84697	2.86282	2.83399	2.96596	2.86432	2.89357
sp|P62245|RS15A_MOUSE	6	FDVQLKDLEK;FLTVMMKHGYIGEFEIIDDHR;HGYIGEFEIIDDHR;MNVLADALKSINNAEK;QFGFIVLTTSAGIMDHEEAR;WQNNLLPSR		6.21922	6.13226	6.25764	5.86883	5.3244	5.62716	5.16278	5.20044	5.13492	6.2345	6.23528	6.43159	5.6439	5.31525	5.20836	5.30239	5.1339	5.36232	6.54399	6.4533	6.23297	5.93375	5.37046	5.15733	5.31443	5.41259	5.33792
sp|P98078-2|DAB2_MOUSE;sp|P98078-3|DAB2_MOUSE;sp|P98078|DAB2_MOUSE	11	AEENGSEALMTLDDQANK;AFGYVC[+57.0214635]GGEGQHQFFAIK;DLFQVIYNVK;GFSSSNPSVVSQPASSDPHR;IWVNISLSGIK;LIGIDDVPDAR;LIGIDDVPDARGDK;TGQQAEPLVVDLK;TGQQAEPLVVDLKDLFQVIYNVK;TGVIEHEHPVNK;VGIPQEHVDHDDFDANQLLNK		-0.38197	-1.44194	-0.403768	3.1352	2.89335	2.87287	3.39229	3.61597	3.47493	0.313063	0.642243	0.377693	4.07137	3.93054	3.98743	4.54441	4.54903	4.67501	-1.41842	-0.0141332	-1.04237	3.00674	2.88198	2.69829	3.67501	3.32607	3.14621
sp|P50580|PA2G4_MOUSE	17	EGEFVAQFK;FDAMPFTLR;FTVLLMPNGPMR;GDAMIMEETGK;GIAFPTSISVNNC[+57.0214635]VC[+57.0214635]HFSPLK;HELLQPFNVLYEK;ITSGPFEPDLYK;ITSGPFEPDLYKSEMEVQDAELK;KGIAFPTSISVNNC[+57.0214635]VC[+57.0214635]HFSPLK;LVKPGNQNTQVTEAWNK;SDQDYILKEGDLVK;SEMEVQDAELK;SLVEASSSGVSVLSLC[+57.0214635]EK;TIIQNPTDQQK;TIIQNPTDQQKK;TVENATSGETLEENGAGD;VAHSFNC[+57.0214635]TPIEGMLSHQLK		7.17026	6.93932	7.067	5.60927	5.4488	5.44385	5.14494	5.20278	5.07984	7.06034	7.10442	7.24911	5.40978	5.46985	5.63215	5.30863	5.22792	5.32891	7.24715	7.17578	7.23709	5.59229	5.41635	5.67353	5.26516	5.10419	5.16544
sp|Q8WTY4|CPIN1_MOUSE	7	EPVETAEVNNDK;EPVETAEVNNDKMK;ESSFDVILSGVVPGSTSLHSAEVLAEMAR;LQELTGSEGQVFMENVTQLLQSSHK;NC[+57.0214635]TC[+57.0214635]GLAEELER;NC[+57.0214635]TC[+57.0214635]GLAEELEREQSK;SAC[+57.0214635]GNC[+57.0214635]YLGDAFR		2.47398	2.30296	2.47531	1.82733	1.10698	1.40236	1.21614	1.17987	1.23336	2.36156	2.40311	2.29826	1.31177	1.28247	1.29683	1.24991	0.905998	1.2823	2.64365	2.58869	2.58233	1.75847	1.04916	1.55892	1.21458	1.10774	1.16883
sp|O55127|CP26A_MOUSE	12	DALQLLIEHSWER;FIVPHPEDASR;FSFIPFGGGLR;GLLVYPEVK;GWNVIYSIC[+57.0214635]DTHDVADIFTNK;HC[+57.0214635]DWQLLNGPPTMK;LQATEPDGGC[+57.0214635]K;LQATEPDGGC[+57.0214635]KDALQLLIEHSWER;NLFSLPIDVPFSGLYR;SNQDNKLDMETLEQLK;TILGAGC[+57.0214635]LSNLHDSSHK;TSPTVYPVDNLPAR		-1.21591	-0.744934	-0.541825	5.63299	5.92499	5.9254	5.6954	5.70538	5.82257	-1.63308	-0.585669	-0.869264	5.78335	5.83627	5.80471	6.18175	6.38511	6.34199	-1.78238	-0.947593	-1.0477	5.74829	5.80483	5.63958	5.91455	5.66621	5.64335
sp|Q8VDM6|HNRL1_MOUSE	14	AEC[+57.0214635]EILMMVGLPAAGK;AEPYC[+57.0214635]SVLPGFTFIQHLPLSER;AIVIC[+57.0214635]PTDEDLKDR;EALGGQALYPHVLVK;HLPSTEPDPHVVR;IGWSLDSC[+57.0214635]STQLGEEPFSYGYGGTGKK;LLAALEAEEPEDER;NC[+57.0214635]AVEFNFGQR;NPPGASSYNK;NYILDQTNVYGSAQR;QENESSYDR;SGGGGYNQNR;WDVLIQQATQC[+57.0214635]LNR;YNILGTNAIMDK		3.60849	3.65119	3.74974	4.16758	4.16486	3.93049	4.12991	4.06652	4.0932	3.55905	3.42181	3.32522	4.3475	4.09293	4.14758	4.0432	4.05758	3.83449	3.35479	3.41958	3.54633	3.91753	4.32378	4.2019	3.92037	3.9687	3.87133
sp|Q80Y17|L2GL1_MOUSE	7	ALGPVESLQGHLQDPSK;APVVAIAVLDGR;DAATVTQMHFLPGQGR;FWDASGVALRPLYK;HGQGFYLISPSEFER;IYGAPGVEFTGLHR;LQEANAQLAEQTC[+57.0214635]PHDLEMTPVQR		-1.54478	-1.44997	-1.20979	-0.750378	-1.05714	-1.54063	-1.27142	-1.14364	-1.71926	-1.1329	-1.24619	-0.928684	-1.13827	-1.09218	-1.34549	-1.62741	-2.10201	-2.26408	-1.59594	-1.2512	-1.12407	-1.18369	-1.28255	-0.947695	-2.09734	-1.05399	-1.26519
sp|Q3TIV5|ZC3HF_MOUSE	10	DEELEKDTMDNWDEK;DVEETGITVASVER;EDEISLEDLIER;ELQELNELFKPVVAAQK;EVFEFRPELVNDDDEEADDTR;FSTYAPDKDENK;HFLEAIENNK;IDKLEQDMER;ITLESFLAWK;LSEASGGLAENGER		3.16793	2.91257	2.95755	2.09394	1.60313	1.6454	1.70842	1.9083	1.55657	3.01424	3.1298	3.34502	1.90773	1.84446	1.77168	1.83906	1.72395	2.06913	3.26053	3.16783	3.12997	2.09181	1.71182	2.13386	1.65789	1.85652	1.81977
sp|Q9CXG3|PPIL4_MOUSE	7	EMGFGHYEEEESC[+57.0214635]WEK;IGADEEIDDFKGR;LNPVTTDEDLEIIFSR;SAEEVEEIKAEK;TGESLC[+57.0214635]YAFIEFEKEEDC[+57.0214635]EK;YDLILDEQGEDSK;YYNYC[+57.0214635]LIHNVQR		-0.345797	-0.362901	-0.576692	-1.12818	-1.3473	-1.52703	-1.61873	-1.58088	-1.73219	-0.429167	-0.548332	-0.555222	-1.22314	-1.19108	-1.52276	-1.42853	-1.53394	-1.38347	-0.755506	-0.558438	-0.348221	-1.30886	-1.01629	-1.23477	-2.02564	-1.55757	-1.31864
sp|P48760-2|FOLC_MOUSE;sp|P48760-3|FOLC_MOUSE;sp|P48760-4|FOLC_MOUSE;sp|P48760-5|FOLC_MOUSE;sp|P48760|FOLC_MOUSE	7	INGKPISPELFTK;NLLNHPTANSGASILR;SDPQAQLEAMEMYLAR;SNAALALQLAHC[+57.0214635]WLER;TGFFSSPHMVQVR;TLNTLQTNASYLEQVK;TLNTLQTNASYLEQVKR		0.0851773	0.297188	0.676166	-1.49355	-1.65034	-1.42986	-2.45829	-3.04452	-2.11745	0.275163	-0.184631	0.0645659	-1.486	-1.9028	-2.31728	-1.78578	-2.73822	-3.18691	-0.550941	0.0921199	0.0711222	-2.09659	-1.12405	-3.66904	-1.9121	-0.77673	-2.4934
sp|Q69ZN7|MYOF_MOUSE	19	AEDIPQMDDAFSQTVK;DSFSDPYAHVSFLHR;FDATC[+57.0214635]KPLASTTQYSR;GKSDENEDPSVVGEFK;GPSGTVSEAQLAR;GWEWEGDWVVDPER;IDVGFVYDEPGHAVMR;IPAHQVLYSTSGGNASGK;IPANQLAEVWLK;LEGALGADTTEDGEEKGPEK;LIDEVIEDTRYTLPVTEGK;MAPSETHGAAAIFK;NANPEWNQVVNLQIK;SDENEDPSVVGEFK;SITGEDMSDIYVK;SLDGEGNFNWR;SLLTEADAGHTEFTDEVYQNENR;TQGLVPEHVETR;WLLLNDPEDTSSGAK		-1.34964	-1.11312	-1.18379	-0.862394	-0.811469	-0.996988	0.539089	0.515741	0.524087	-0.697102	-1.22122	-1.13378	-0.0991603	-0.25707	-0.113607	1.6126	1.84279	1.58529	-1.83765	-0.793648	-1.3	-0.53564	-0.666866	-0.218313	1.21464	0.759301	0.510687
sp|Q99PP7|TRI33_MOUSE	16	DIGKPEVEYDC[+57.0214635]DNMQHSK;DTSEAPSSSDEK;GNMNC[+57.0214635]GAFQAHQMR;LFC[+57.0214635]ETC[+57.0214635]DR;LLQQQNDITGLSR;LQHMQQQVYAQK;NYVHFAATQVQNR;QEPGTEEEIC[+57.0214635]SFSGAVK;TC[+57.0214635]IEAHQR;TEPTDISESC[+57.0214635]K;TPGQINLAQLR;VAIFTLINEINKK;VKQEPGTEEEIC[+57.0214635]SFSGAVK;VVQVYADTQEINLK;VVQVYADTQEINLKGDSEVAK;YQFLEEAFQNQK		2.10614	2.08267	2.26786	1.70608	1.58336	1.52804	1.18559	1.0496	1.16626	2.05832	2.12139	2.25738	1.6308	1.46079	1.42409	1.10741	1.1618	0.975369	2.21372	2.33994	2.38257	1.68764	1.70254	1.66703	1.22	1.15865	1.25436
sp|O09106|HDAC1_MOUSE	10	DGIDDESYEAIFKPVMSK;ISIC[+57.0214635]SSDKR;LGC[+57.0214635]FNLTIK;LHISPSNMTNQNTNEYLEK;QQTDIAVNWAGGLHHAK;SFNLPMLMLGGGGYTIR;VC[+57.0214635]YYYDGDVGNYYYGQGHPMKPHR;VMEMFQPSAVVLQC[+57.0214635]GSDSLSGDR;YHSDDYIK;YYAVNYPLR		5.29138	5.22895	5.33484	5.0497	4.94045	4.93555	4.57688	4.55711	4.57887	5.20722	5.1761	5.26542	5.04224	4.87794	4.89807	4.45501	4.45107	4.46402	5.30637	5.32528	5.3103	4.97979	5.00267	5.1007	4.50224	4.60341	4.62162
sp|P50431|GLYC_MOUSE	16	ALSDALTELGYK;AVLEALGSC[+57.0214635]LNNK;AVLEALGSC[+57.0214635]LNNKYSEGYPGQR;DSDAEVYSIIK;GLLEEDFQK;IMGLDLPDGGHLTHGFMTDK;IQSAVATLR;IYQLQVLANC[+57.0214635]R;LIIAGTSC[+57.0214635]YSR;MLSQPLKDSDAEVYSIIK;VGLELIASENFASR;VLEAC[+57.0214635]SIAC[+57.0214635]NK;VLEAC[+57.0214635]SIAC[+57.0214635]NKNTC[+57.0214635]PGDK;VYPETGYINYDQLEENASLFHPK;YSEGYPGQR;YYGGTEFIDELEMLC[+57.0214635]QKR		5.38457	5.45813	5.45119	4.00506	4.11296	3.81575	3.47858	3.38106	3.50891	5.08594	4.91124	4.9192	3.97783	3.75781	3.99856	3.19037	3.17392	3.13137	4.9573	4.91469	5.11788	3.80849	4.08315	3.86503	3.37099	3.32691	3.24445
sp|Q9DAW6|PRP4_MOUSE	17	AGIEAGNINITSGEVFEIEEHISER;ALGEPITLFGEGPAER;ALGEPITLFGEGPAERR;APDDLVAPVVK;C[+57.0214635]VYTIPAHQNLVTGVK;DVNLASC[+57.0214635]AADGSVK;EIYGINFSPNGYHIATGSGDNTC[+57.0214635]K;FEPIHGDFLLTGAYDNTAK;FLGTTC[+57.0214635]YDR;IWTHPGWSPLK;LWIANYSLPR;LWSLDSDEPVADIEGHTVR;LWSVPDC[+57.0214635]SLLHTLR;MLATAC[+57.0214635]WSGLC[+57.0214635]K;NILSVVGTDALKK;QINVSTDDSEVK;TSQMQELHK		4.5051	4.61617	4.62926	3.66994	3.72225	3.63217	3.4246	3.44045	3.41055	4.51684	4.48965	4.47409	3.74791	3.67052	3.74681	3.48006	3.6608	3.43436	4.39464	4.59681	4.60248	3.50938	3.78195	3.80945	3.28608	3.44446	3.41693
sp|P70296|PEBP1_MOUSE	8	EWHHFLVVNMK;GNDISSGTVLSDYVGSGPPSGTGLHR;KYNLGAPVAGTC[+57.0214635]YQAEWDDYVPK;LYTLVLTDPDAPSR;LYTLVLTDPDAPSRK;VDYAGVTVDELGK;VLTPTQVMNRPSSISWDGLDPGK;YVWLVYEQEQPLSC[+57.0214635]DEPILSNK		6.41589	6.28281	6.41678	6.12687	5.77194	5.86791	6.13287	6.37303	6.04977	6.44019	6.56578	6.66357	5.95711	6.01621	6.10552	6.30017	6.35525	6.29504	6.71199	6.70885	6.50267	6.0428	5.89264	6.23882	6.02477	6.3394	6.36321
sp|Q8BWT1|THIM_MOUSE	9	AANEAGYFNEEMAPIEVK;DFSATDLTEFAAR;DGTVTAGNASGVSDGAGAVIIASEDAVKK;LEDTLWAGLTDQHVK;LPMGMTAENLAAK;QTMQVDEHARPQTTLEQLQK;TNVSGGAIALGHPLGGSGSR;TPFGAYGGLLK;VGVPTETGALTLNR		0.514529	0.423468	0.892218	2.33054	1.96211	1.98725	3.98605	4.17812	3.84514	1.47977	1.4374	1.90279	2.58434	2.48534	2.68162	4.21118	4.41101	4.23024	1.97795	2.06421	1.96533	2.78109	2.82119	3.23683	4.04183	4.45538	4.66704
sp|Q9WUP7-2|UCHL5_MOUSE;sp|Q9WUP7|UCHL5_MOUSE	12	EEDAFHFVSYVPVNGR;EFSQSFDAAMK;EGPIDLGAC[+57.0214635]NQDDWITAVRPVIEK;FNLMAIVSDR;FNLMAIVSDRK;GAQVEEIWSLEPESFEK;GLALSNSDVIR;LKPVHGLIFLFK;NQMLIEEEVQK;QQMFEFDTK;TLAEHQQLIPLVEK;WQPGEEPAGSVVQDSR		4.81947	4.80213	4.90394	4.23889	4.14726	4.24276	3.97037	3.95666	3.84135	4.85738	4.85773	5.09484	4.27064	4.04569	3.96892	3.91692	3.94768	3.98173	4.93627	4.89858	4.87392	4.35251	4.20656	4.31141	3.90904	3.96094	3.97348
sp|P26369|U2AF2_MOUSE	11	ELLTSFGPLK;IFVEFTSVFDC[+57.0214635]QK;LFIGGLPNYLNDDQVK;LFIGGLPNYLNDDQVKELLTSFGPLK;LGGLTQAPGNPVLAVQINQDK;NFAFLEFR;QLNENKQER;SIEIPRPVDGVEVPGC[+57.0214635]GK;SVDETTQAMAFDGIIFQGQSLK;YC[+57.0214635]DPDSYHR;YWDVPPPGFEHITPMQYK		5.87674	5.93187	5.92833	5.3601	5.3709	5.18318	5.06489	5.14543	5.13503	5.83534	5.81931	5.75492	5.35894	5.24614	5.2811	5.03247	4.79253	5.17808	5.83284	5.6808	5.77077	5.23705	5.43072	5.28042	4.94707	5.12828	5.07807
sp|Q9CSH3|RRP44_MOUSE	23	ASLTYAEAQMR;AVQEGIPAFTC[+57.0214635]EEYVK;DDIGC[+57.0214635]GAPAC[+57.0214635]SAC[+57.0214635]GGAHAGPALELQPR;ETYIEQEQGENANDR;ETYIEQEQGENANDRNDR;FHMDSETHDPIDLQTK;GTTVYLC[+57.0214635]EK;HLC[+57.0214635]VC[+57.0214635]SVDPPGC[+57.0214635]TDIDDALHC[+57.0214635]R;IDMVPELLSSNLC[+57.0214635]SLR;IDSAAMNDDITTSLR;IEGTVFHVFDK;IIFSEHLPLSK;IIVAIDGWPR;ITLDSSNLQHQK;LAFSC[+57.0214635]IWEMNHNAEILK;LAYDDEIPSLR;LAY…		5.01445	4.99394	5.00381	4.16402	4.01498	4.02824	3.58798	3.63385	3.56084	4.9663	5.039	4.98978	4.02114	3.99555	4.07501	3.72707	3.70409	3.72346	4.91411	4.89035	4.8864	4.0744	3.97792	4.05193	3.5998	3.6761	3.57484
sp|O08529|CAN2_MOUSE	12	DGELLFVHSAEGSEFWSALLEK;DREAAEGLGSHER;EAAEGLGSHER;FADDELIIDFDNFVR;GHAYSVTGAEEVESSGSLQK;IMVDMLDEDGSGK;LEEEDEDEEDGER;NPWGQVEWTGK;NYPNTFWMNPQYLIK;QEDGEFWMSFSDFLR;SGTMNSYEMR;YLNQDYETLR		0.506121	0.436945	0.560762	1.12601	0.738947	0.958632	2.27447	2.32866	2.20801	0.377982	0.320671	0.512337	1.51829	1.20742	1.29091	3.07928	3.21297	3.21552	0.0757871	-0.202736	-0.206934	0.61381	0.473757	0.595084	2.10341	2.07466	2.01449
sp|Q8BVY0|RL1D1_MOUSE	20	ALLATETPEASAPGTSGK;ALLATETPEASAPGTSGKK;ATSLLTQSGLASSAPAK;ATSLLTQSGLASSAPAKSPGAQK;C[+57.0214635]ITGTVLNISK;C[+57.0214635]ITGTVLNISKR;DEFDSPEQTEGFYK;DEFDSPEQTEGFYKK;DVQEFRKPEASSFSTPR;HGVNTISQIIPFK;IGHTGMETEHIVDNILAVSEMLSEK;KALLATETPEASAPGTSGK;KATSLLTQSGLASSAPAK;KAVEVISNR;KVPVSVNLLAK;LLGSFEVFITDAR;SVSLPIFSSFVTSQDENAVSLR;VPLPHSILSESSDVC[+57.0214635]LFTK;VPVSVNLLAK;VTEEC[+57.0214635]EEAIPQLVPIGETPDKEN…		6.28169	6.1424	6.25355	5.0035	4.89434	4.93905	4.18239	4.23422	4.21649	6.2502	6.38849	6.50465	4.89651	4.99699	5.00845	4.5087	4.30514	4.49173	6.3284	6.36692	6.2917	5.05669	5.0883	5.37246	4.37259	4.52461	4.37537
sp|Q3TZX8-2|NOL9_MOUSE;sp|Q3TZX8-3|NOL9_MOUSE;sp|Q3TZX8|NOL9_MOUSE	5	C[+57.0214635]SSYVLLQENAPVR;LLVDLIRVLSPNYVVQLYSDR;MNC[+57.0214635]YNDYENYIDIVK;VLSPNYVVQLYSDR;VSPNVTQPVR		2.32975	2.12174	2.52696	1.60434	1.55049	1.66917	1.38077	1.14642	1.23983	2.32324	2.02606	2.24688	1.46352	1.35736	1.30866	0.974771	0.649608	0.814203	1.94128	2.16487	2.46385	1.4172	1.67499	1.85038	1.1401	1.14294	0.929019
sp|P56395|CYB5_MOUSE	4	EQAGGDATENFEDVGHSTDAR;FLEEHPGGEEVLR;TYIIGELHPDDR;YYTLEEIQK		3.43735	3.43159	3.41916	2.8897	2.58102	2.61511	2.67506	3.03269	2.71959	3.11168	3.36903	3.39609	2.54176	2.52917	2.53822	2.89774	3.12066	2.85774	3.64569	3.55817	3.35953	2.93718	2.75522	2.96272	3.25001	3.17244	2.98795
sp|Q91VK1|BZW2_MOUSE	6	DTLVQGLNEAGDDLEAVAK;HQKPVLTGQR;KEELVAEQALK;LLELFPVNR;MTNHC[+57.0214635]VFSANEDHETIR;YFTDAGLKELSDFLR		2.73467	2.95028	2.64321	1.42159	1.91114	1.92532	1.81746	2.20406	2.11399	2.72684	2.99318	3.23554	1.53827	1.78095	1.92918	2.40613	2.76927	2.4571	3.08458	2.94655	3.18821	1.96949	1.75669	1.77397	1.98133	2.13955	2.27624
sp|P67871|CSK2B_MOUSE	3	C[+57.0214635]MDVYTPK;VYC[+57.0214635]ENQPMLPIGLSDIPGEAMVK;YQQGDFGYC[+57.0214635]PR		3.53875	3.68166	3.77465	3.23031	3.45973	3.34191	2.87379	2.93549	3.12413	3.49067	3.52012	2.97156	3.2836	3.38523	3.36215	2.85052	2.9896	2.6995	3.29577	3.54136	3.51762	3.23244	3.58746	3.68	2.62838	2.93348	2.79757
sp|P14873|MAP1B_MOUSE	22	AAEAGVTEEQYGYLGTSAK;AEEDMDDVLEK;ASLTLFC[+57.0214635]PEEGDWK;EEGYEPDKTEAEDYVMAVADK;ESSPLYSPGFSDSTSAAK;ITSFPESESYSYETSTK;LEMYVLNPVK;MSISEGTVSDK;NLISPDLGVVFLNVPENLKDPEPNIK;SPC[+57.0214635]DSGYSYETIEK;SPDTSAYC[+57.0214635]YETMEK;SSMLFDTMQHHLALNR;SSYYVVSGNDPAAEEPSR;SVGNTIEPVILFQK;SVSPGVTQAVVEEHC[+57.0214635]ASPEEK;SWDTNLIEC[+57.0214635]NLDQELK;THDVGGYYYEK;TPEDGGYTC[+57.0214635]EITEK;TPEEGGYSYEISEK;TPE…		3.31047	3.18455	3.28943	1.81472	1.56581	1.74977	2.34593	2.31914	2.16378	2.96794	3.06187	3.26404	1.43763	1.37353	1.51217	1.85999	1.64216	1.04965	3.0816	3.02665	3.03823	1.51548	1.40729	1.80311	1.33815	1.71302	2.21071
sp|Q9CQG2-2|MET16_MOUSE;sp|Q9CQG2|MET16_MOUSE	5	APEDVILALEER;C[+57.0214635]SLAPLKEELR;EEVSLFLTAIENSWIHLR;LLC[+57.0214635]QEETPEATEDERDEER;RPPPSSVNTGGITEIMAEGGELEFVK		1.2887	1.0889	1.30807	-0.261941	-1.02605	-0.397621	-0.90196	-0.608658	-1.09642	1.12086	1.42315	1.66725	-0.520699	-0.983345	-0.66258	-0.550389	-1.1228	-0.384488	1.32156	1.51793	1.41648	-0.388874	-1.13213	-0.661265	-0.442062	-0.509608	-0.547061
sp|Q9JIM1-2|S29A1_MOUSE;sp|Q9JIM1|S29A1_MOUSE	7	ALADPTVALPAR;EESGVPGPNSPPTNR;HYLQLNLAGPAEQETK;IVFIPLLMLC[+57.0214635]NVK;REESGVPGPNSPPTNR;SLTAVC[+57.0214635]MWPGQDSR;WLPVLVASR		4.21423	4.36374	4.51196	1.7384	2.49433	2.02316	1.04355	0.705908	1.05707	4.3143	4.18516	4.36397	2.59929	2.42175	2.69783	1.44153	1.692	1.54156	4.10993	4.1769	4.35833	1.59779	2.49146	2.15902	0.947585	0.834862	0.689985
sp|Q6A0A9|F120A_MOUSE	16	EAALEAAVLNKEE;EKTPLIDLC[+57.0214635]DGQAEQAAK;GDPGDQVKVEGSSTASSGSQLAEGK;LEIAGTVVGHWAGSR;LLVDADNC[+57.0214635]LHR;LYEPDQLQELK;NLTEQNSYSNIPHEGK;QTAQQIVSHVQNK;SLTTSQYLMHEVAK;SQGAIQGRPPYAASAEEVAK;SQGGVQPIPSQGGK;TGSHAEPLAR;TPLIDLC[+57.0214635]DGQAEQAAK;VAQSIEDHHQEVIGFC[+57.0214635]R;VEGSSTASSGSQLAEGK;VTAASGHC[+57.0214635]GAFSGSDSSR		0.779598	0.676026	0.758175	1.28764	1.00987	1.11792	1.58657	1.71002	1.45866	0.67945	0.837962	1.02397	1.28725	1.24777	1.44931	2.02164	2.08967	2.03176	1.0359	1.04515	0.880713	1.16425	1.17327	1.60014	1.59178	1.53216	1.4731
sp|O35855|BCAT2_MOUSE	10	AADLQIQMTK;AIQYGASAHDWMFR;AWIGGVGDC[+57.0214635]K;EVFGSGTAC[+57.0214635]QVC[+57.0214635]PVHQILYEGK;LC[+57.0214635]LPDFDKQELLEC[+57.0214635]IR;LFRPWLNMDR;LGGNYGPTVAVQR;QLHIPTMENGPELILR;QSLLDLAR;TFTDHMLMVEWNNK		5.38474	5.46462	5.49072	4.17616	4.28306	4.19428	3.44856	3.4232	3.60113	5.11401	5.07239	5.03823	4.04586	3.87935	3.96172	3.71341	4.06979	3.74318	5.21272	5.41449	5.28991	4.00085	4.217	3.98097	3.50292	3.54519	3.29672
sp|Q61655|DD19A_MOUSE	13	AAQSLLNKLIR;DGNPDNETYLHR;EGHQVALLSGEMMVEQR;GLAVNMVDSK;LDTDDLDEIEK;LKPQLLQGVYAMGFNRPSK;SNLVDNTNQVEVLQR;SNLVDNTNQVEVLQRDPSSPLYSVK;TAAFVLAMLSR;TASWLAAELSK;VEPADRYPQC[+57.0214635]LC[+57.0214635]LSPTYELALQTGK;VFVLDEADVMIATQGHQDQSIR;VLVTTNVC[+57.0214635]AR		4.01737	4.08694	4.13493	4.02207	3.91226	3.93954	3.93537	4.01459	4.02329	3.97465	4.02738	4.16613	4.05872	3.88291	3.76103	4.09141	4.22382	4.1019	4.13097	4.22349	4.14196	4.00995	4.08312	3.8947	3.81004	4.09539	4.06132
sp|Q8VCG3|WDR74_MOUSE	8	GLAQADGTLITC[+57.0214635]VDSGILR;HAANFTPSGQPR;SQLNC[+57.0214635]LLLSGR;VPIWDQDTQFLPGSQK;VWC[+57.0214635]ENDKEASSDPLLELK;VWDLQGSEEPVFR;YC[+57.0214635]PGGEGTFR;YFNAEEGTFLSQR		3.55064	3.39186	3.55218	2.0488	2.01859	1.87901	1.34748	1.16423	1.28476	3.49935	3.4089	3.25283	2.16537	1.98587	2.10826	1.15783	1.06653	1.00139	3.33766	3.29651	3.50713	2.08379	2.28877	2.48546	1.4014	1.44152	1.24984
sp|Q920B9|SP16H_MOUSE	36	AASITSEVFNK;APGEQTVPALNLQNAFR;ASNMKAPGEQTVPALNLQNAFR;DDLYAEQMER;DLGFNGAPYR;EDGELNLMK;EELEFEVPFR;EGSLVINSK;ELAAQLNEEAK;ELAAQLNEEAKR;ESLGSEEESGKDWDELEEEAR;ESRYEEEEEQSR;GDKVDILYNNIK;GNENANGAPAITLLVR;HTDVQFYTEVGEITTDLGK;IC[+57.0214635]DVYNSVMDVVK;IC[+57.0214635]DVYNSVMDVVKK;INFYC[+57.0214635]PGSALGR;KYETVIMPVFGIATPFHIATIK;LAESVEKAIEEK;LTEQKGEQQIQK;MQGSLEAHVNGFR;NEDDEEEEEEKDEAEDLLGR;NEGNIFPNPEATFVK;NF…		6.93911	6.91799	7.00574	6.49734	6.48708	6.44936	6.19852	6.14844	6.11064	6.89395	6.88167	6.95947	6.55455	6.27844	6.40995	6.06979	6.05066	6.06184	6.85584	6.93513	6.94603	6.40706	6.53705	6.71643	5.99915	6.1048	6.10921
sp|P49312|ROA1_MOUSE	22	DYFEQYGK;DYFEQYGKIEVIEIMTDR;EDSQRPGAHLTVK;EDSQRPGAHLTVKK;EDTEEHHLRDYFEQYGK;GFAFVTFDDHDSVDK;GFAFVTFDDHDSVDKIVIQK;GFGFVTYATVEEVDAAMNARPHK;GGGFGGNDNFGR;IEVIEIMTDR;IFVGGIKEDTEEHHLR;KLFIGGLSFETTDESLR;LFIGGLSFETTDESLR;NQGGYGGSSSSSSYGSGR;RGFAFVTFDDHDSVDK;SESPKEPEQLR;SGSGNFGGGR;SHFEQWGTLTDC[+57.0214635]VVMR;SHFEQWGTLTDC[+57.0214635]VVMRDPNTK;SSGPYGGGGQYFAKPR;YHTVNGHNC[+57.0214635]EVR;YHTVNGHNC[+57.021463…		8.32852	8.32773	8.13907	7.99506	7.49667	7.50288	7.27279	7.42705	7.23161	8.31724	8.42701	8.31504	7.84675	7.5938	7.338	7.22636	7.22229	7.28255	8.4915	8.36877	8.09951	7.94544	7.62823	7.33132	7.11332	7.68404	7.64864
sp|Q9CW03|SMC3_MOUSE	34	AELGTDLLSQLSLEDQK;AELGTDLLSQLSLEDQKR;AFTMDC[+57.0214635]ITLEGDQVSHR;AKDLQDELAGNSEQR;ALDQFVNFSEQK;ALEYTIYNQELNETR;C[+57.0214635]DPAPFYLFDEIDQALDAQHR;DFVEDDTTHG;DKMEDIER;DLEDTEANKEK;DLQDELAGNSEQR;DQTIVDPFSSK;DTAYPETNDAIPMISK;EENAEQQALAAK;EHMDAINHDTK;ELGSLPQEAFEKYQTLSLK;ETEGGTVLTATTSELEAINKR;GALTGGYYDTR;GSGSQSSVPSVDQFTGVGIR;INNEIDQLMNQMQQIETQQR;INNEIDQLMNQMQQIETQQRK;INQMATAPDSQR;KAEEELGELEAK;LALLHEG…		5.37009	5.30055	5.47683	4.99144	4.8767	4.86652	4.72373	4.72101	4.67157	5.33278	5.41404	5.65769	4.99864	4.89341	5.00586	4.7284	4.82692	4.75769	5.51908	5.5399	5.4986	4.97188	4.95492	5.26813	4.63869	4.67054	4.81012
sp|Q8BTI8-3|SRRM2_MOUSE;sp|Q8BTI8|SRRM2_MOUSE	25	AAETPAVASC[+57.0214635]WSGPQVSPEHK;AAFGISDSYVDGSSFDPQRR;DKFSPTQDRPESSTVLK;EETPGQRPVVTETHQLAELNEK;IALALTAISLGTARPPPSMSAAGLAAR;IPAASAAAMNLASAR;LGLIQEDVASSC[+57.0214635]IPR;LMLLEKDVNPGAK;MAPALSGANLTSPR;MVQASSQSLLPPAQDRPR;NSGPVSEVNTGFSPEVK;QSHSESSPDGEVK;RPNPDILDHER;SAHGTAPVNIAGSR;SLLPNSSQDELMEVEK;SSVPENHAQSR;SVVQTTPVAGSQSLSSGTVAK;TAPAANLASR;TAVAPSAVNLADPR;TKPDSSIYPLVDSK;TPAAAAAMNLASPR;TPAASAVNLAGAR;T…		5.9294	5.80788	5.84072	5.0569	4.98577	4.83527	4.19124	4.12712	4.10081	5.62268	5.7982	6.1516	4.97649	4.74931	4.71391	4.38708	4.70119	3.80653	5.44058	5.67028	5.59453	4.96329	4.75114	5.2752	3.80867	4.115	4.60493
sp|Q9DBZ5|EIF3K_MOUSE	8	ALTNLPHTDFTLC[+57.0214635]K;C[+57.0214635]MIDQAHQEERPIR;ENAYDLEANLAVLK;FIC[+57.0214635]HVVGITYQHIDR;WLLAEMLGDLTDNQLK;YGWSADESGQVFIC[+57.0214635]SQEESIKPK;YNPENLATLER;YVETQAKENAYDLEANLAVLK		4.32865	4.22452	4.39004	3.32867	3.06093	3.25847	3.11146	3.01103	2.96036	4.32223	4.24959	4.32222	3.22017	3.09727	3.14147	3.34245	2.98157	3.15735	4.47437	4.34082	4.4226	3.29405	3.04782	3.38266	3.05825	3.02636	3.07177
sp|Q9ERG0|LIMA1_MOUSE	13	ELSVEEQIKR;ENVPPGPEAC[+57.0214635]SVHQEGSK;HEAEKPETSENTETSGK;IYC[+57.0214635]KPHFNQLFK;LLANQQVFHISC[+57.0214635]FR;LSLGTYASLHGR;MENC[+57.0214635]LGDSR;NNPESLPQHFR;SQDVGFWEGEVVR;SSAIVEIFSK;TEAPEDVDLDLKK;TVYPMERLLANQQVFHISC[+57.0214635]FR;VGVLAASMEAK		2.46389	2.59467	2.54251	3.34553	2.85991	2.86919	2.95594	3.26538	3.10647	2.02081	2.21334	2.39251	3.09778	2.83646	2.80763	3.45994	3.73291	3.30831	1.98642	2.05316	1.93166	3.03477	2.90489	3.18013	3.14229	3.15509	3.0794
sp|Q62465|VAT1_MOUSE	16	AC[+57.0214635]GLNFADLMGR;C[+57.0214635]LVLTGFGGYDK;C[+57.0214635]LVLTGFGGYDKVK;ENGVTHPIDYHTTDYVDEIKK;GVDIVMDPLGGSDTAK;GYHLLKPMGK;IDSVWPFEK;LPPLPVTPGMEGAGVVVAVGEGVGDRK;LQSRPAVPPAPGPGQLTLR;LVALYNQGHIKPR;TVENVTVFGTASASK;TWWNQFSVTALQLLQANR;VLLVPGPEK;VLLVPGPEKET;VVTYGMANLLTGPK;VVTYGMANLLTGPKR		4.45302	4.43293	4.48483	6.10002	6.1187	6.03552	5.76739	5.85075	5.76431	4.39473	4.32797	4.4289	5.8095	5.63227	5.69301	5.62211	5.85055	5.52649	4.60449	4.83602	4.76923	5.78745	6.02108	6.09211	5.52602	5.60477	5.57443
sp|Q9D6T0|NOSIP_MOUSE	7	DMVDPVNGDTLTER;DSLSNATPC[+57.0214635]AVLRPSGAVVTLEC[+57.0214635]VEK;DTAASGYGTQNIR;EAILEYILHQK;EAILEYILHQKR;LQAEMSRPVMQA;NC[+57.0214635]TAGAVYTYHEK		0.751897	0.8166	0.904686	0.658942	0.245884	0.271212	-0.52131	-0.193634	0.0513666	0.737942	0.942365	1.21982	0.406812	0.147499	0.0726716	-0.226821	0.282095	-0.275108	1.05521	1.01193	0.786728	0.513027	0.084403	-0.00653575	-0.281867	0.200057	-0.498019
sp|P53996-2|CNBP_MOUSE;sp|P53996-3|CNBP_MOUSE	2	C[+57.0214635]GESGHLAKDC[+57.0214635]DLQEDAC[+57.0214635]YNC[+57.0214635]GR;DC[+57.0214635]DLQEDAC[+57.0214635]YNC[+57.0214635]GR		3.2512	2.72438	2.96368	2.41994	1.73703	2.08706	1.34832	0.784405	1.11314	2.76599	2.51573	1.51564	2.08109	1.906	2.04638	1.51711	1.1218	1.30191	2.86132	2.66011	2.99978	1.83676	1.84925	2.33927	1.20457	0.942316	0.797191
sp|P39749|FEN1_MOUSE	4	HLLSLMGIPYLDAPSEAEASC[+57.0214635]AALAK;LIADVAPSAIR;QLQQAQEAGMEEEVEK;WSEPNEEELVK		2.44114	2.17526	2.34504	1.8269	1.74634	1.72012	1.49829	1.92583	1.77201	2.36702	2.62929	2.76507	1.47331	1.7993	2.30164	1.87471	1.41861	1.74279	2.68493	2.33516	2.54672	2.25995	1.49546	2.12813	1.99015	1.68191	1.66435
sp|P63005|LIS1_MOUSE	14	EAELDMNEELDKK;EEFTSGGPLGQK;FILSC[+57.0214635]ADDK;GHTDSVQDISFDHSGK;LLASC[+57.0214635]SADMTIK;LWDFQGFEC[+57.0214635]IR;MVRPNQDGTLIASC[+57.0214635]SNDQTVR;MWDVSTGMC[+57.0214635]LMTLVGHDNWVR;MWEVQTGYC[+57.0214635]VK;SNGYEEAYSVFK;SNGYEEAYSVFKK;TAPYVVTGSVDQTVK;VWDYETGDFER;VWVVATK		4.63725	4.58202	4.74273	4.26199	4.27825	4.11271	4.41008	4.34316	4.43446	4.53404	4.42218	4.29288	4.358	4.10572	4.24285	4.44149	4.13538	4.44686	4.43155	4.41399	4.64514	4.04584	4.28479	4.17906	4.17857	4.28386	4.29168
sp|Q8BSY0|ASPH_MOUSE	8	AQC[+57.0214635]EDDLAEK;EGIESGDPGTDDGR;FYFHLGDAMQR;GDWSQFTLWQQGR;LGVYDADGDGDFDVDDAK;LIFIVDVWHPELTPQQR;NDLGVGYLLLGDNDSAK;VLIFDDSFEHEVWQDASSFR		-0.46297	-0.626791	-0.867088	0.805027	0.416621	0.528399	1.52479	1.57662	1.59065	-0.848174	-0.25609	-0.0737543	1.00124	0.849077	0.849122	2.1669	1.73937	2.34246	-0.36454	-0.982032	-1.03782	0.971753	0.511752	0.90948	1.71675	1.56768	1.43043
sp|Q99PV0|PRP8_MOUSE	62	AAVMHDILDMMPEGIK;ADWWTNTAHYNR;ALNMAIPGGPK;ANIPWKVPGLPTPIENMILR;ANPALYVLR;ASGFEESMK;DGPYITAEEAVAVYTTTVHWLESR;DGVWNLQNEVTK;DIILGMEISAPSQQR;DINLQDEDWNEFNDINKIIIR;DMNHTNSYGIIR;DNPNLLFNMC[+57.0214635]GFEC[+57.0214635]R;DVMDSTTTQK;EAVVNTQELLDLLVK;EELGLIEQAYDNPHEALSR;EHC[+57.0214635]PAGQPVK;ELGGLGMLSMGHVLIPQSDLR;EQSQLTATQTR;ETGYTYILPK;EVGIEFMDLYSHLVPVYDVEPLEK;FIC[+57.0214635]ISDLR;FTLWWSPTINR;GMLDPLEVHL…		6.91183	7.01336	7.08755	6.71199	6.7248	6.72159	6.4645	6.40295	6.48927	6.94417	6.93712	7.05494	6.79484	6.58671	6.54215	6.46671	6.52296	6.45459	6.89799	6.9668	6.95256	6.69029	6.75295	6.61493	6.32291	6.4399	6.55385
sp|Q8R5M8-2|CADM1_MOUSE;sp|Q8R5M8-3|CADM1_MOUSE;sp|Q8R5M8-4|CADM1_MOUSE;sp|Q8R5M8-5|CADM1_MOUSE;sp|Q8R5M8|CADM1_MOUSE	1	EGDAFELTC[+57.0214635]EAIGKPQPVMVTWVR		-2.14522	-2.46909	-2.17318	-1.51456	-1.69448	-2.49555	-1.79591	-1.57784	-2.01323	-1.8756	-2.37554	-4.79348	-1.92459	-1.76731	-2.10802	-2.53842	-2.66316	-3.04794	-2.60344	-2.59997	-2.08088	-1.89345	-2.19413	-3.10861	-2.44946	-1.71393	-1.74381
sp|Q9WUM5|SUCA_MOUSE	9	HLGLPVFNTVK;IGIMPGHIHKK;IIC[+57.0214635]QGFTGK;ISALQSAGVVVSMSPAQLGTTIYK;ISALQSAGVVVSMSPAQLGTTIYKEFEK;LIGPNC[+57.0214635]PGVINPGEC[+57.0214635]K;LVGGTTPGKGGQK;MGHAGAIIAGGK;QGTFHSQQALEYGTK		4.40703	4.29886	4.45414	4.68985	4.71101	4.55258	4.8148	4.60878	4.78125	4.39821	4.22704	4.0836	5.02095	4.83328	5.00407	5.13581	5.03338	4.93865	4.16597	4.30123	4.52869	4.53119	5.07561	5.01834	4.70583	4.64774	4.50715
sp|Q791V5|MTCH2_MOUSE	7	EEGIVGFFAGLIPR;LC[+57.0214635]SGVLGTVVHGK;QVC[+57.0214635]QLPGLFC[+57.0214635]YAQHIASIDGR;SAATLITHPFHVITLR;VLIQVGYEPLPPTIGR;VLQYYQESEKPEELGSVTVQK;YC[+57.0214635]GLC[+57.0214635]DSIVTIYR		3.7114	3.75578	3.9247	3.50444	3.75583	3.60008	3.77207	3.65313	3.74451	3.84448	3.66713	3.37403	3.39298	3.57781	3.4144	3.41924	3.33653	3.38585	3.61399	3.82191	4.01147	3.28672	3.8336	3.07716	3.6656	3.68648	3.5594
sp|P39054|DYN2_MOUSE	14	ALLQMVQQFGVDFEK;ALLQMVQQFGVDFEKR;DMILQFISR;ESSLILAVTPANMDLANSDALK;GMEELIPLVNK;IEGSGDQVDTLELSGGAR;LQDAFSSIGQSC[+57.0214635]HLDLPQIAVVGGQSAGK;NLVDSYVAIINK;QIELAC[+57.0214635]DSQEDVDSWK;QIELAC[+57.0214635]DSQEDVDSWKASFLR;RIEGSGDQVDTLELSGGAR;TEYAEFLHC[+57.0214635]K;TLNQQLTNHIR;VPVGDQPPDIEYQIK		1.61753	1.54184	1.56381	2.37975	2.2022	2.20975	2.51164	2.68014	2.61177	1.74121	1.83477	1.93582	2.41902	2.61307	2.78734	3.27284	3.07838	3.49566	2.0413	1.92807	2.01678	2.58885	2.25855	2.52472	2.78321	2.61351	2.63527
sp|Q80SW1|SAHH2_MOUSE	5	EIEIAEQDMSALISLR;KQIQFADDMQEFTK;NSC[+57.0214635]IVC[+57.0214635]NMGHSNTEIDVTSLR;QVDVVITC[+57.0214635]TGNK;TTDVMFGGK		0.722424	0.525499	0.428441	1.19113	1.13057	0.944364	1.45409	1.18147	1.29627	0.685618	0.262468	0.0159868	1.37297	0.983099	0.859318	1.19118	0.957546	1.01586	0.307236	0.259867	0.443923	1.04036	1.2471	1.23894	1.24603	1.31731	1.32147
sp|Q05D44|IF2P_MOUSE	31	AIIVEFAQQGLNAALFYENKDPR;ALPGMGTTIDVILINGR;C[+57.0214635]PFIVALNK;DAAAVKPTENNEEESASK;DAQEMADSLGVR;EGDTIIVPGVEGPIVTQIR;ELEELSLEAQGIR;GDTAAALEDDNEGDK;GDTAAALEDDNEGDKK;HFEATDILVSK;HKEVEAAQGVK;HLQAQGVEVPSK;IEPIPGESPK;IERDAQEMADSLGVR;IFSAEIIYHLFDAFTK;ILPQYIFNSR;ILPQYIFNSRDPIVIGVTVEAGQVK;IPGMLIIDTPGHESFSNLR;KRPVYEDK;KSPDSDVAVTLK;LKEGDTIIVPGVEGPIVTQIR;NTKDEFEER;QGTPMC[+57.0214635]VPSK;QSIDALKDWFR;SPDSDVA…		5.16822	5.13158	5.24173	4.92636	4.68812	4.84254	4.52442	4.55164	4.44784	5.09812	5.16788	5.29431	4.8549	4.65856	4.62159	4.58501	4.65194	4.59805	5.08748	5.14613	5.07204	4.77	4.77559	4.83385	4.33426	4.57682	4.54864
sp|P23780|BGAL_MOUSE	15	AGATLDILVENMGR;AYVSVDGVPQGILDR;EASDEGHLDGR;GPLINSEFYTGWLDHWGKPHSTVK;GQVWINGFNLGR;NLMTALNIR;QYFGYVLYR;SLYPLTFTQVK;SSDPDYLVAVDK;SSDPDYLVAVDKWLAVLLPK;TLATSLYNLLAR;TTLPQDC[+57.0214635]SNPKPIFSSPFNGVR;TVAEALGILC[+57.0214635]PNGPVK;YHLGNDVILFTTDGASEK;YISGSIHYFR		1.24955	1.20133	1.16654	3.71001	3.67561	3.75893	5.56546	5.72876	5.53833	0.881693	0.937143	0.89509	4.07086	3.9346	3.93406	5.49476	5.74144	5.53202	1.39326	1.46535	1.48602	3.67272	3.89532	3.81282	5.56968	5.66019	5.75278
sp|Q8K2T8|PAF1_MOUSE	10	AGVQSGTNALLVVK;DTSGAAALEMMSQAMIR;EGDGVYYNELETR;GYEENYFFIFR;LLEEEIQAPTSSK;QQFTEEEIYK;QQFTEEEIYKDR;VTPVEVMPVFPDFK;YC[+57.0214635]NSLPDIPFDPK;YGISNEKPEVK		2.66545	2.66927	2.82177	2.38386	2.40122	2.24481	2.05366	2.13951	2.09872	2.63727	2.70488	3.05764	2.40504	2.32345	2.48056	2.06639	2.08224	2.146	2.63505	2.77573	2.77879	2.44939	2.5762	2.8685	1.88015	2.08682	2.24288
sp|Q9WV32|ARC1B_MOUSE	8	ASSEGGAATGAGLDSLHK;EHNGQVTGIDWAPESNR;EVEERPAPTPWGSK;NAYVWTLK;NSVSQISVLSGGK;TWKPTLVILR;VAWVSHDSTVC[+57.0214635]LVDADK;VAWVSHDSTVC[+57.0214635]LVDADKK		3.0951	3.00928	3.12277	3.44805	3.28327	3.27656	3.36325	3.44033	3.30288	3.14121	3.16597	3.31738	3.73508	3.44134	3.413	4.05215	4.27282	4.07007	3.22229	3.30705	3.25657	3.2772	3.35939	3.19478	3.48039	3.40688	3.25081
sp|Q8CIV8|TBCE_MOUSE	3	LEHLVLSDIGLSSIHFPDAEIGC[+57.0214635]K;VNFGDDFLTALK;YVLEDGPDDDENSC[+57.0214635]SLK		-0.636479	-0.621944	-0.49756	-0.977014	-1.01917	-0.798125	-0.898931	-0.919401	-0.815722	-0.946829	-0.541941	-0.148709	-1.20827	-1.34899	-1.04277	-0.956002	-0.896724	-0.97582	-0.937219	-0.758669	-0.611577	-1.03594	-1.09307	-0.560173	-0.822399	-1.02008	-0.611028
sp|Q7TPD0|INT3_MOUSE	12	DIIHNPQALSPQFTGILQLLQSR;EANDALNAYVC[+57.0214635]K;FSDLFSLAEEYEDSSTKPPK;GEVLPEEVTEESLEESVGKPLYLIFR;GTVAAAASGAAGGGGGGAGAGAPGGGR;IPEFELLWK;LALFYDWLFFSPEK;LAQLTLEQILEHLDNLR;LIVDHHGTAQLQTLR;LLLSTSLDAKDELEER;NIWLAESVLDILTEQR;VLAHLAPLFDNPK		2.08207	2.25444	2.31588	2.05765	2.02387	2.15646	1.59487	1.79236	1.63373	2.15601	2.30931	2.36001	2.05857	1.9495	1.66215	1.57391	1.71732	1.72845	2.252	2.23786	2.32415	2.11247	1.94856	1.35893	1.46028	1.76471	1.89769
sp|Q6GQT9|NOMO1_MOUSE	22	AEGNDHIER;ALGQAASDSSGPEDMKR;DC[+57.0214635]SIYGEDTVTDEEGK;DC[+57.0214635]SIYGEDTVTDEEGKFR;EGYVLTAVEGTVGDFK;ELLFYPPSMEATVSGESC[+57.0214635]PGK;FEPSSQMIEVQEGQNLR;FLLFSSLVNK;GGDINFLFTGFSVNGK;GLLPGC[+57.0214635]MYHVQLK;GQPLGPAGVQVSLR;IEPVFHVMGFSVTGR;IQSTVTQPGGK;ISIMHEDWC[+57.0214635]WR;LDFTVEHDSLR;SDVEINYSLIEIK;SESLDNPIQTVSLGQSLFFHFPPLLR;SQYDYVLPQVSFTAVGYHK;SSIDSEPALVLGPLK;VDGVSDIC[+57.0214635]TK;VNS…		3.55375	3.63956	3.6603	3.99058	4.11119	4.0948	4.16587	4.18266	4.25185	3.69356	3.65027	3.72241	4.29194	4.12222	4.14585	4.54214	4.7244	4.69133	3.50768	3.71638	3.69812	4.07769	4.25348	4.12452	4.27136	4.26265	4.23403
sp|O35643|AP1B1_MOUSE	16	APEVSQHVYQAYETILK;APEVSQHVYQAYETILKN;DC[+57.0214635]PLNTEAASNK;DC[+57.0214635]PLNTEAASNKLQSSNIFTVAK;DIANENEAQFQIR;DVSALFPDVVNC[+57.0214635]MQTDNLELKK;LAPPLVTLLSAEPELQYVALR;LHDINAQLVEDQGFLDTLK;LLSTDPVAAK;LQSSNIFTVAK;LTNGIWVLAELR;NNIDVFYFSTLYPLHVLFVEDGK;QMFLATWK;SQPDMAIMAVNTFVK;SQPDMAIMAVNTFVKDC[+57.0214635]EDPNPLIR;VNYVVQEAIVVIK		3.58161	3.73233	3.88643	3.90543	3.77482	3.85756	4.08841	4.13826	4.12694	3.7194	3.71375	3.68516	3.94439	3.75627	3.82845	4.26745	4.37882	4.37993	3.76458	3.742	3.87635	3.75711	3.70194	3.69138	3.79692	3.96416	3.96658
sp|Q9ESW8|PGPI_MOUSE	1	LGLGDSVDLHVYEIPVEYQTVQR		-1.74392	-1.97453	-1.64025	0.40268	-0.0609217	-0.1808	0.248539	0.505453	0.218465	-1.64724	-1.50513	-1.8873	0.0678719	0.0120621	-0.416797	0.152886	0.266615	0.160517	-1.30664	-1.16936	-1.47529	0.245145	-0.0704136	-0.952192	0.247699	0.485434	0.309542
sp|Q9R008|KIME_MOUSE	3	LTGAGGGGC[+57.0214635]GITLLKPGLEQATVEAAK;VIHGNPSGVDNAVSTWGGALR;VSVNLPNIGIK		-4.48339			-5.6274	-5.87558	-7.39433			-7.67736	-3.94577		-8.82905	-6.0633	-6.86295	-4.37448	-7.01633	-6.63784	-8.63182	-3.0353	-6.41583		-5.39462	-5.38144	-4.28328		-7.59279	-9.32213
sp|O35841|API5_MOUSE	16	DAYQVILDGVK;ELPQFATGENLPR;EVEELILTESK;EVEELILTESKK;GTLGGLFSQILQGEDIVR;ITNNINVLIK;LLAEMSSFC[+57.0214635]GDMEK;LLAEMSSFC[+57.0214635]GDMEKLETNLR;LQFSYVEC[+57.0214635]LLYSFHQLGR;NYGILADATEQVGQHK;QAIKELPQFATGENLPR;QIYNPPSGKYSSNLSNFNYER;STVTLSWKPVQK;TLPDEVLTKEVEELILTESK;VLEDVTGEEFVLFMK;YSSNLSNFNYER		3.90732	3.89289	3.79173	3.32028	3.13652	3.28381	2.80605	2.8993	2.68851	3.89938	4.01625	4.06528	2.97219	3.06397	3.15016	2.95391	2.35151	2.84442	4.06405	3.91948	3.97807	3.48851	2.84988	3.32032	2.89193	2.75174	2.91148
sp|Q9Z2U0|PSA7_MOUSE	9	AITVFSPDGHLFQVEYAQEAVK;AITVFSPDGHLFQVEYAQEAVKK;ALLEVVQSGGK;GKDIVVLGVEK;ILNPEEIEK;LTVEDPVTVEYITR;LYQTDPSGTYHAWK;NYTDDAIETDDLTIK;RPFGISALIVGFDFDGTPR		5.35856	5.41323	5.36046	5.32826	4.92848	5.17329	4.87868	5.03942	4.9076	5.37231	5.56016	5.6957	5.05929	4.96321	5.2418	5.04999	4.96902	5.07255	5.63729	5.46646	5.56067	5.45547	4.89401	5.39534	4.93659	4.95959	5.02547
sp|P62488|RPB7_MOUSE	5	GEVVDAVVTQVNK;HSIPSEMEFDPNSNPPC[+57.0214635]YK;LFTEVEGTC[+57.0214635]TGK;TMDEDIVIQQDDEIR;VGLFTEIGPMSC[+57.0214635]FISR		2.46195	2.44434	2.40381	1.84509	1.81148	1.81488	1.4041	1.51381	1.23419	2.38482	2.32636	2.07694	1.809	1.71801	1.63602	1.42746	1.53505	1.34374	2.28325	2.52085	2.43245	1.70342	1.90502	1.84869	1.05156	1.13196	1.24906
sp|Q8VCT3|AMPB_MOUSE	10	AFFPC[+57.0214635]FDTPAVK;DTFAATASQLHSNVVNYVQQILAPK;EEYSGVIEEFLATGEK;GYC[+57.0214635]FVSYLAHLVGDQDQFDK;ISNAQNAELR;KKPFVYTQGQAVLNR;NDYQEEFQK;QHMNVSGEENPLNK;TYQLVYFLDK;YTLPLYHAMMGGSEMAR		0.868604	0.869245	1.05902	1.21316	0.881065	0.948047	1.14125	1.18334	1.07399	1.06339	1.11391	1.23367	1.44017	1.16183	1.12364	1.74201	1.70302	1.9804	1.09188	1.26811	1.39198	1.2807	1.30659	1.1753	1.6173	1.28119	1.32068
sp|Q5F285|TM256_MOUSE	1	LGALSGAGALGLASYGAHGAQFPDAYGK		-1.86699	-1.9225	-1.48502	-0.237163	-0.426728	-0.186142	0.670851	0.952551	0.603875	-1.4248	-1.35311	-1.29107	0.0656942	-0.0830689	0.182319	0.832171	0.799442	0.54975	-1.41583	-1.23435	-1.36204	-0.112746	0.0529542	0.304781	0.695887	1.08344	1.19517
sp|Q8BY87-2|UBP47_MOUSE	19	ADPYTADEGSGEGHK;AETVAAPVTVR;AGGDSGNVDDDC[+57.0214635]ER;C[+57.0214635]LEC[+57.0214635]GYEGWR;ENGVTTADMAPLDHTSDK;FLEVDEYPEHIK;KPDQIFQSYKPGEVMVK;LFVLLPEQSPGSYSK;LFVLLQTSK;LNETLSSFSDDNK;MMDLEDVIPLDC[+57.0214635]C[+57.0214635]R;QHLEPFVGVLSSHFK;SFSDDQWYSFNDQHVSR;SLSLQQQQQDGDNGDSSK;SMSQLAILTR;STETSDFENIESPLNER;SYEGEEDTPMGLLLGGVK;VC[+57.0214635]QLLVNEQEPC[+57.0214635]K;VYTSNQEFETVR		1.24614	1.20029	1.36341	2.18764	2.41454	2.25336	2.3767	2.22855	2.5172	1.39664	1.12817	1.23086	2.46789	2.26424	2.41921	2.28801	2.20564	2.23097	0.993689	0.945894	1.19155	2.07094	2.39885	2.37822	1.94254	2.11536	2.27358
sp|Q68FL4-2|SAHH3_MOUSE;sp|Q68FL4|SAHH3_MOUSE	1	NSC[+57.0214635]IVC[+57.0214635]NMGHSNTEIDVASLR		-3.93585	-4.24541	-3.82777	-2.25937	-2.65658	-3.41127	-2.31783	-2.63533	-2.26361	-3.85031	-4.6234	-6.62562	-1.79402	-2.18208	-2.03765	-2.35497	-4.76275	-3.04093	-4.11448	-3.90382	-3.48417	-2.74485	-1.97494	-2.50928	-2.46194	-2.58964	-2.84205
sp|Q6P5D8|SMHD1_MOUSE	33	AHVEGDGVVEGVIR;ALQVSEHADYAGFR;ASVC[+57.0214635]QTIGISSEEK;DSFTAVVITGVQPEHIQYLK;EHLVQGLLPDVQVPTSVK;EITC[+57.0214635]NNFDHTVK;FSFGLLDSPFR;GFNEEDTDTPLFIGK;GMVFGAPVPK;GPNC[+57.0214635]VIQGVVAK;GSAEITTLVLAENSPGR;HQDEVTWVAGDVIR;ISGALFTNDKFQVSTNK;ITLEANSQSVSVQGIR;KPADSAHITNDDER;LHFKPFGNPVFAR;LIPYTSVGDFDWC[+57.0214635]APPK;LKDEDDDDDC[+57.0214635]FISEK;LLFDETQGKPAVAVVDNGR;LLLMDWPELK;LLPSSHAAC[+57.0214635]…		3.19191	3.15805	3.30756	3.43437	3.27583	3.28795	3.86983	3.83696	3.7565	3.10955	3.177	3.31039	3.38347	3.27126	3.19875	3.41176	3.38591	3.42474	3.12198	3.26216	3.15512	3.48093	3.58435	3.50804	3.71082	3.99102	4.21285
sp|P70349|HINT1_MOUSE	5	AQVAQPGGDTIFGK;C[+57.0214635]LAFHDISPQAPTHFLVIPK;HISQISVADDDDESLLGHLMIVGK;KHISQISVADDDDESLLGHLMIVGK;MVVNEGADGGQSVYHIHLHVLGGR		4.18193	4.06771	4.16788	3.91489	3.49597	3.66802	3.98985	3.90976	3.94879	4.00021	4.11415	4.5462	3.975	3.80169	3.94692	4.70218	4.79472	4.52548	4.43675	4.37394	4.31247	4.02106	3.57023	3.89157	4.26476	3.93165	3.8808
sp|P10518|HEM2_MOUSE	10	AGADIIITYFAPQLLK;AGC[+57.0214635]QVVAPSDMMDGR;AGC[+57.0214635]QVVAPSDMMDGRVEAIK;DAAQSSPAFGDR;DEQGSAADSEDSPTIEAVR;DIQEGADMLMVKPGLPYLDMVR;LAEVALAYAK;TAVLETMTAFR;VPKDEQGSAADSEDSPTIEAVR;YGVNQLEEMLRPLVEAGLR		2.6245	2.72962	2.82685	3.30225	3.23946	3.22274	3.42997	3.6559	3.48281	2.64914	2.64322	2.76612	3.06011	3.0972	2.79247	3.2521	3.39184	3.29654	2.63378	2.67637	2.65977	3.27143	3.33355	2.96897	3.38814	3.78822	3.93415
sp|Q11011|PSA_MOUSE	26	AFFESHPAPSAER;AGIISTVEVLK;ATFDISLVVPK;DADSIHQYLLQR;DNWEELHNR;DYFNVPYPLPK;FIKDNWEELHNR;IDFVGELNDK;ILMDKPEMSVVLK;KPYPDDENLVEVK;LEAAAQVR;LGLQNDLFSLAR;LGWDPKPGEGHLDALLR;LNLGTVGFYR;MLHDYIGDKDFK;QMGFPLIYVEAEQVEDDR;QMGFPLIYVEAEQVEDDRVLK;SPVYLTVLK;TQYSSAMLESLLPGIR;VALSNMNVIDR;VLGATLSPELIQK;VLTFALSEEVRPQDTVSVIGGVAGGSK;VTLSFPSTLQTGTGTLK;YAAVTQFEATDAR;YAAVTQFEATDARR;YQGGFLISR		5.89819	5.8899	5.96902	5.74783	5.59685	5.64885	5.88831	6.05035	5.81848	5.87495	5.87768	6.10741	5.76658	5.59948	5.67397	6.30618	6.57816	6.37506	5.92667	5.98444	5.96654	5.62471	5.74402	5.83141	5.79908	5.89016	5.92886
sp|Q569Z6|TR150_MOUSE	14	AEEMEDEPFTER;AEEYPEEAEER;EESAASGGAAYSK;EESTSGFDK;EHHFGSSGMTLHER;EQTFSGGTSQDIK;GSESSKPWPDATTYGAGSASR;KAEEMEDEPFTER;MDSFDEDLARPSGLLAQER;SIFQHIQSAQSQR;SPLQSVVVR;SPPATGSAYGSSQKEESAASGGAAYSK;SREEEWDPEYTPK;YKDDPVDLR		4.70465	4.52895	4.66417	4.63752	4.33458	4.31914	4.34669	4.33219	4.21108	4.50281	4.66615	4.95302	4.58039	4.47593	4.57056	4.44839	4.59987	4.30808	4.77176	4.70125	4.57662	4.48927	4.39846	4.81884	4.20717	4.25616	4.33127
sp|P28740-1|KIF2A_MOUSE;sp|P28740-2|KIF2A_MOUSE;sp|P28740|KIF2A_MOUSE	7	DLDVITIPSKDVVMVHEPK;FDYAFDDSAPNEMVYR;FSLIDLAGNER;GMATC[+57.0214635]FAYGQTGSGK;QQVQVVGLQER;THTMGGDFSGK;TSGQTSANAHSSR		2.246	2.20743	2.36724	1.94895	1.93008	1.9249	1.68292	1.6875	1.64535	2.18956	2.26227	2.37737	1.84334	1.88373	1.93636	1.40578	1.32844	1.28621	2.08841	2.20653	2.27047	1.96555	2.0029	2.12745	1.72375	1.81005	1.85981
sp|Q8K2V6|IPO11_MOUSE	9	C[+57.0214635]AILTTLIHLVQGLGADSK;FC[+57.0214635]GIINISVEALHDVMTEDPETR;IFQNMSPLLELSSENLR;LTVDDFEFR;NMEVMGFLHGIFER;TQLLPELQVSHNR;VLLDFLDQHPISFTPLIQR;VTEDEEPPTEQDK;VTEDEEPPTEQDKR		2.24817	2.5043	2.47716	1.95549	2.19752	2.3879	1.58219	1.45294	1.87898	2.59621	2.28864	2.20313	1.86278	1.65408	0.934163	1.13425	0.968333	1.25005	2.45627	2.1881	2.2585	1.97565	1.86119	0.354071	1.35184	1.80488	1.96451
sp|Q99LL5|PWP1_MOUSE	6	DTEQYEHEDFLIKPTDNLIVC[+57.0214635]GR;GC[+57.0214635]LVTASADK;GC[+57.0214635]LVTASADKFVK;SDKPIFTLNAHNDEISGLDLSSQIK;VQTLQFHPFEAQTLISGSYDK;VWDISTVSSVNEAFGR		2.313	2.06197	2.08827	1.54137	1.29503	0.974677	0.771829	0.702666	0.641878	2.16956	2.05435	1.85418	1.40191	1.32226	1.33807	0.705668	-0.0922737	0.788269	2.00182	1.86591	1.95462	1.39693	1.26985	1.36505	0.816855	0.717706	0.630294
sp|Q8BYN3|ITPK1_MOUSE	6	FQEYIDAHPETIVLDPLPAIR;LGC[+57.0214635]TTGVSPSFQQHC[+57.0214635]VASLATK;LLEQNGLAFPFIC[+57.0214635]K;LTDVILEADQNDSQSLELVHR;TETEAGNMGAGASAK;VFVVGESYTVVQRPSLK		2.61625	2.7279	2.90382	0.493263	0.458273	0.364014	-0.737091	0.774633	-0.728146	2.89723	2.78969	2.85915	0.500738	0.190912	0.199756	-1.27181	0.451739	-0.606719	3.00424	3.07701	3.13653	0.689306	0.682545	0.573951	0.591068	0.0799095	-0.147046
sp|Q9R0L6-2|PCM1_MOUSE;sp|Q9R0L6|PCM1_MOUSE	19	AC[+57.0214635]PDLQLSATSISSGPTK;ALNMPPLDC[+57.0214635]R;ALYALQDIVSR;DPQQEPMEETENLKK;DQHLNNSSFVPSTSLQR;EHMDEVC[+57.0214635]SSQLLTSVR;HSAQTEEPVQAK;KPFNFLPMQINTNK;LMQDLDNNSIAVK;LTHLIEHLKEQEK;MLQQQEQLR;MVLTLTQQNDESKEFVK;NIGYESASVSSTC[+57.0214635]EPC[+57.0214635]K;QLEALMAEHQR;SDGSENLC[+57.0214635]TPQQSR;TEYMAFPKPFESSSSLGAEK;TPESTNVPSDQEPTSK;TPWLYDQEGGVEKPFFK;YMTQMSVPEQAELEK		1.64419	1.70362	1.76256	1.85733	1.19047	1.34312	1.55922	1.59273	1.51136	1.56802	2.2185	1.69345	1.85147	1.28778	1.38421	1.25786	1.42317	1.15662	2.24426	1.73714	1.69512	1.64836	1.65179	1.6268	1.1921	1.30626	1.70642
sp|Q921N6|DDX27_MOUSE	21	AAPDILIATPGR;AC[+57.0214635]IPVGLLGK;AITAMGFKQPTPIQK;DIC[+57.0214635]AC[+57.0214635]AATGTGK;EAIVAALLMR;EGMYDGSWALADVMSQLK;EGMYDGSWALADVMSQLKK;EMQQSEAQIDTAQR;GKETADQEPER;GQAAGGFFEDASEYDK;IFVNSNTDVAPFLR;KGQAAGGFFEDASEYDK;MLDEYFEEQMK;MLDEYFEEQMKEIIR;SADFNPDFVFTEK;SLSFQDMNLSRPLLK;SVFDEELTNTSK;SVFDEELTNTSKK;SVSLVGEEERK;TAAFALPVLER;TVINFTMPNTVK		5.32415	5.38196	5.32546	3.8257	3.97321	3.9047	3.32868	3.22909	3.30519	5.25954	5.21674	5.28045	3.98347	3.9513	4.07893	3.39381	3.69494	3.31141	5.0781	5.24256	5.33632	3.85567	4.17673	4.26796	3.31468	3.38499	3.34028
sp|P97801|SMN_MOUSE	3	ETC[+57.0214635]VVVYTGYGNR;GTGQSDDSDIWDDTALIK;NGDIC[+57.0214635]ETPDKPK		-0.841319	-1.16478	-0.953687	-2.45286	-2.87184	-2.64664	-2.49166	-2.95024	-2.94928	-1.08818	-1.10235	-0.829468	-2.62438	-2.3835	-2.3211	-2.32307	-2.43516	-2.70921	-1.20648	-0.951978	-0.978726	-2.60221	-2.54919	-1.97114	-2.66186	-2.98	-2.90797
sp|Q99K48|NONO_MOUSE	18	ALIEMEKQQQDQVDR;EKLEMEMEAAR;EQPPRFAQPGSFEYEYAMR;FAC[+57.0214635]HSASLTVR;FAQPGSFEYEYAMR;GIVEFSGKPAAR;HEHQVMLMR;LEMEMEAAR;LFVGNLPPDITEEEMR;MEELHNQEVQK;MEELHNQEVQKR;MGQMAMGGAMGINNR;NLPQYVSNELLEEAFSVFGQVER;QQQDQVDR;RMEELHNQEVQK;RQQEEMMR;TLAEIAKVELDNMPLR;VELDNMPLR		6.23132	6.22042	6.21023	6.14297	5.81781	6.06531	5.84425	5.79548	5.65451	6.17752	6.27659	6.27435	5.94839	6.01725	5.97371	5.8357	5.89719	5.76481	6.12649	6.09171	6.18461	6.15279	6.18982	5.9858	5.66492	5.96442	5.9837
sp|P07607|TYSY_MOUSE	8	DFLDSLGFSAR;DMDSDYSGQGVDQLQK;GVLEELLWFIK;IIMC[+57.0214635]AWNPK;IWDANGSRDFLDSLGFSAR;MLVVGSELQSDAQQLSAEAPR;QEGDLGPVYGFQWR;TGTGTLSVFGMQAR		3.48857	3.4931	3.64294	2.86426	2.6097	2.70803	2.41058	2.45701	2.32383	3.54934	3.52802	3.76559	2.73846	2.46487	2.43798	2.26892	2.55363	2.37576	3.65641	3.76314	3.63364	2.84903	2.70491	2.66794	2.226	2.52664	2.5513
sp|O55131|SEPT7_MOUSE	19	ADTLTPEEC[+57.0214635]QQFK;DVTNNVHYENYR;FEDYLNAESR;ILEQQNSSR;IYEFPETDDEEENK;IYEFPETDDEEENKLVK;KLAAVTYNGVDNNK;KMEMEMEQVFEMK;LAAVTYNGVDNNK;LKDSEAELQR;LPLAVVGSNTIIEVNGK;NLEGYVGFANLPNQVYR;NLEGYVGFANLPNQVYRK;QFEEEKANWEAQQR;QYPWGVAEVENGEHC[+57.0214635]DFTILR;SPLAQMEEER;SPLAQMEEERR;STLINSLFLTDLYSPEYPGPSHR;THMQDLKDVTNNVHYENYR		4.27082	4.09759	4.07594	4.46735	4.16115	4.20335	4.2518	4.31181	4.21935	4.15333	4.3259	4.4301	4.07571	4.12415	4.36777	4.19343	4.03193	4.10083	4.5344	4.38456	4.32532	4.52752	4.07551	4.5642	4.39069	4.25239	4.30251
sp|P17918|PCNA_MOUSE	10	AEDNADTLALVFEAPNQEK;AEDNADTLALVFEAPNQEKVSDYEMK;ATPLSPTVTLSMSADVPLVVEYK;C[+57.0214635]AGNEDIITLR;DLSHIGDAVVISC[+57.0214635]AK;FSASGELGNGNIK;LIQGSILKK;LMDLDVEQLGIPEQEYSC[+57.0214635]VIK;NLAMGVNLTSMSK;YYLAPKIEDEEAS		7.05982	7.11349	7.22916	6.35871	6.31951	6.15972	5.45601	5.58061	5.5877	6.8784	6.85856	6.78783	6.28478	6.20178	6.23042	5.37871	5.42397	5.34335	6.88779	6.997	7.06553	6.24759	6.40378	6.68372	5.34155	5.57952	5.55138
sp|P05202|AATM_MOUSE	21	ASAELALGENNEVLK;ASAELALGENNEVLKSGR;DAGMQLQGYR;DDNGKPYVLPSVR;DVFLPKPSWGNHTPIFR;EFSVYMTK;EYLPIGGLAEFC[+57.0214635]K;FVTVQTISGTGALR;IAATILTSPDLR;IAATILTSPDLRK;ILIRPLYSNPPLNGAR;ISVAGVTSGNVGYLAHAIHQVTK;KAEAQIAAK;KQWLQEVK;MNLGVGAYRDDNGKPYVLPSVR;NLDKEYLPIGGLAEFC[+57.0214635]K;NLFAFFDMAYQGFASGDGDKDAWAVR;NMGLYGER;TC[+57.0214635]GFDFSGALEDISK;TQLVSNLKK;VGAFTVVC[+57.0214635]KDAEEAK		6.74239	6.83255	6.83625	6.72508	6.79726	6.76339	6.87464	6.9433	6.85036	6.78201	6.77482	6.89268	7.05666	6.85668	6.96634	7.20594	7.55238	7.19201	6.74924	6.86524	6.82663	6.88693	7.06252	7.10942	6.83657	6.91903	6.91174
sp|Q61543|GSLG1_MOUSE	32	ADIFVDPVLHTAC[+57.0214635]ALDIK;AKDDSELEGQVISC[+57.0214635]LK;ALNEAC[+57.0214635]ESVIQTAC[+57.0214635]K;AMDVKLDPALQDK;C[+57.0214635]AIGVTHFQLVQMK;C[+57.0214635]NVENLPR;DAHSQGEVVSC[+57.0214635]LEK;EPENEISSDC[+57.0214635]NHLLWNYK;FC[+57.0214635]ENTQAGEGR;GEIEHHC[+57.0214635]SGLHR;GGAGPGGTGGGWK;GYMVSC[+57.0214635]LVDHR;HTWSNNLAVLEC[+57.0214635]LQDVR;IEMWSYAAK;IIIQESALDYR;LAEEESC[+57.0214635]REDVTR;L…		3.63611	3.64371	3.66897	4.66602	4.54616	4.39311	4.7953	4.74727	4.92448	3.67433	3.64411	3.30345	4.73839	4.57646	4.64598	5.01866	4.8084	4.98361	3.70468	3.73802	3.70431	4.67784	4.65663	4.60895	4.89617	4.90364	4.72807
sp|Q9Z2I8-2|SUCB2_MOUSE;sp|Q9Z2I8|SUCB2_MOUSE	12	DIFAMDDKSENEPIENEAAR;ELELKVPLVVR;EQIDIFEGIK;ETYLAILMDR;IDATQVEVNPFGETPEGQVVC[+57.0214635]FDAK;INFDDNAEFR;LEGTNVQEAQNILK;MAENLGFLGSLK;SENEPIENEAAR;SSGLPITSAVDLEDAAK;SSGLPITSAVDLEDAAKK;VVGELAQQMIGYNLATK		3.30358	3.27603	3.38352	3.67686	3.57685	3.57467	3.73103	3.8496	3.79869	3.61646	3.52661	3.74731	3.85489	3.83097	3.98716	4.21335	4.40047	4.31112	3.81406	3.78518	3.77955	4.05585	3.93354	4.2407	4.10951	3.98185	3.96304
sp|Q60716-2|P4HA2_MOUSE;sp|Q60716|P4HA2_MOUSE	17	GQEFLRPC[+57.0214635]GTTEVD;GTAVFWYNLLR;HAAC[+57.0214635]PVLVGC[+57.0214635]K;IKEIAKPK;KGTAVFWYNLLR;LLSLDPSHER;LQDTYKLDPDTISR;QFFPTDEDESGAAR;QLDAGEEATVTK;SAADPEGYLAHPVNAYK;SAYNEGDYYHTVLWMEQVLK;SLVLDYLSYAVFQLGDLHR;SSWLEEDDDPVVAR;TGVLTVASYR;VPQLLIAPFKEEDEWDSPHIVR;YQAMLSVDDC[+57.0214635]FGLGR;YYDVMSDEEIER		0.940442	0.117854	0.81192	3.71362	3.61149	3.68875	4.92047	4.97423	5.0533	0.911741	0.982166	1.00107	4.8155	4.66648	4.85074	7.22826	7.48168	7.3117	-0.00388066	0.591724	0.234387	3.86653	3.7527	3.75891	5.35123	4.97451	4.58776
sp|Q9D1D4|TMEDA_MOUSE	5	IPDQLVILDMK;ITDSAGHILYAK;LEDLSESIVNDFAYMK;NYEEIAKVEK;RLEDLSESIVNDFAYMK		2.67079	2.7518	2.72841	3.6902	3.66	3.57729	4.26903	4.33768	4.36971	2.87387	2.6689	2.97681	3.87276	3.79549	3.77176	4.9982	5.26424	5.23713	2.67706	2.81491	2.97017	3.77706	3.71925	3.63203	4.50669	4.24643	4.28228
sp|Q9D0I8|MRT4_MOUSE	9	EGDVLTPEQAR;GEVGLLFTNR;GVVTLLSDYEVC[+57.0214635]K;GVVTLLSDYEVC[+57.0214635]KEGDVLTPEQAR;LFGYEMAEFK;SPSDEYKDNLHQVSK;TKEEVNEWFTK;YLFIFSVANMR;YTEMDFAR		4.1217	4.18234	4.01816	3.04713	2.81103	2.77357	2.06044	1.99859	2.06228	4.13283	4.12618	4.11425	2.88252	2.93755	2.977	2.07496	1.60522	2.36236	4.32657	3.94894	4.13595	3.13645	2.6191	2.98346	2.32889	2.1652	2.12293
sp|Q9Z1R2|BAG6_MOUSE	13	AGSSESIAAFIQR;APPQTQLPSGASSGTGSASATHGGAPLPGTR;DLEAPEVQESYR;ENASPAPGTTAEEAMSR;ESFSLVQVQPGVDIIR;GVNPSLVSWLTTMMGLR;LINLVGESLR;LLGNTFVALSDLR;LQEDPNYSPQR;LQVVLEHMPVGPDAILR;MATHTLITGLEEYVR;SFFHQHYLGGQEPTPSNIR;YC[+57.0214635]EVLGAAATTDYNNNHEGR		4.60704	4.62986	4.6965	4.50016	4.37	4.43182	4.3129	4.32215	4.2292	4.57838	4.59052	4.80222	4.40325	4.22465	4.18985	4.46872	4.67369	4.35927	4.56133	4.65939	4.59736	4.32782	4.32736	4.30368	4.18859	4.28506	4.32733
sp|P32037|GTR3_MOUSE	8	AFEGQAHSGK;EEDQATEILQR;GPAGVELNSMQPVK;GPAGVELNSMQPVKETPGNA;KEEDQATEILQR;LWGTSDVVQEIQEMK;LWGTSDVVQEIQEMKDESVR;QVTVLELFR		4.95955	4.81431	5.03301	4.74205	4.60939	4.58387	4.46892	4.49679	4.4586	5.11148	5.12037	5.31533	4.70649	4.45256	4.43497	3.86096	4.03295	4.02213	4.9717	5.07523	4.91368	4.91659	4.84749	4.53247	4.83011	4.7492	4.50982
sp|Q07113|MPRI_MOUSE	25	ATLITFLC[+57.0214635]DR;ETSDC[+57.0214635]SYMFEWR;FIC[+57.0214635]NDDIYPGAPK;FLHQDIDSTR;GAEVESSQPLR;GHIQLSYTDGDDC[+57.0214635]GSDKK;GNQAFDVGRPK;KPWTAVDTSAYGK;LSSDVC[+57.0214635]SAHDGSK;MSAIIFTC[+57.0214635]DESEDIGRPQVFSEDR;NC[+57.0214635]PEDAAVC[+57.0214635]AVDK;NC[+57.0214635]PEDAAVC[+57.0214635]AVDKNGSK;SEGGSGGNWYAMENSR;SFSLGEIYFK;SNTHDDC[+57.0214635]QVTNPSTGHLFDLSSLSGR;STTIYFYC[+57.0214635]DR;…		2.09734	2.10468	2.14775	3.50848	3.53015	3.26098	3.73787	3.44703	3.67919	1.9374	1.72673	1.77812	3.88235	3.57155	3.72311	4.16499	3.99756	4.10215	1.7005	1.48091	1.76322	3.35185	3.81958	3.58313	3.83513	3.75612	3.6459
sp|P14685|PSMD3_MOUSE	21	AIQLEYSEAR;AIRDGVIEASINHEK;AVHGFFTSNNATR;DFLLPFLEEPMDTEADLQFRPR;DGVIEASINHEK;EEAAAGSGSTGEGDGK;ELDTVTLEDIK;ELDTVTLEDIKEHVR;EMIDIYSTR;EQQDLEFAK;FNQVLDQFGEK;HDADGQATLLNLLLR;ISDDLMQK;ISFC[+57.0214635]LDIHNMSVK;ISLADIAQK;ISLADIAQKLQLDSPEDAEFIVAK;LQLDSPEDAEFIVAK;NYLHYSLYDQAEK;SLMPYFLLTQAVR;SVFPEQANNNEWAR;VYEFLDKLDVVR		4.93893	4.86885	4.76936	4.72658	4.54625	4.62398	4.66431	4.67496	4.62397	5.01917	5.09684	5.19497	4.58088	4.51589	4.73228	4.87857	4.76199	4.80859	5.35031	5.07111	5.11176	5.04245	4.4524	4.53658	4.97091	4.63439	4.68129
sp|Q99LC5|ETFA_MOUSE	17	AAVDAGFVPNDMQVGQTGK;APSSSSVGISEWLDQK;GLLPEELTPLILETQK;GTSFEAAATSGGSASSEK;IVAPELYIAVGISGAIQHLAGMK;IVAPELYIAVGISGAIQHLAGMKDSK;LGGEVSC[+57.0214635]LVAGTK;LLYDLADQLHAAVGASR;LNVAPVSDIIEIK;LNVAPVSDIIEIKSPDTFVR;QFSYTHIC[+57.0214635]AGASAFGK;SDRPELTGAK;SGENFKLLYDLADQLHAAVGASR;TIVAINKDPEAPIFQVADYGIVADLFK;TIYAGNALC[+57.0214635]TVK;TIYAGNALC[+57.0214635]TVKC[+57.0214635]DEK;VLVAQHDAYK		4.77074	4.69911	4.8204	5.34265	5.3307	5.3356	5.94417	5.93126	5.81861	4.88275	4.83873	5.00718	5.73923	5.64963	5.67013	6.16568	6.37599	6.12951	4.90223	5.03909	5.14183	5.42875	5.70433	5.8201	5.82714	5.96574	5.95563
sp|Q9JII6|AK1A1_MOUSE	7	DAGHPLYPFNDPY;GLEVTAYSPLGSSDR;HIDC[+57.0214635]ASVYGNETEIGEALK;HIDC[+57.0214635]ASVYGNETEIGEALKESVGSGK;HPDEPVLLEEPVVLALAEK;MPLIGLGTWK;YIVPMITVDGK		3.17939	3.36362	3.20626	3.10827	3.11455	3.19167	3.25778	3.55832	3.39436	3.42932	3.57394	3.76796	3.00468	3.15317	3.39832	3.75687	3.96794	3.89357	3.76366	3.68213	3.80734	3.39201	3.10714	3.43912	3.54785	3.29989	3.35634
sp|O88487|DC1I2_MOUSE	12	ADAEEEAATR;DLEDKEGEIQAGAK;EAAVSVQEESDLEK;EAAVSVQEESDLEKK;EDEEEEDDVATPKPPVEPEEEK;ETQTPVTAQPK;IC[+57.0214635]SWSLDMLSHPQDSMELVHK;ITQVDFPPR;QQILHSEEFLSFFDHSTR;SVSTPSEAGSQDSGDGAVGSR;TLAEINANR;TLAEINANRADAEEEAATR		2.70783	2.58584	2.66772	2.86029	2.70892	2.68781	2.8082	2.97205	2.92206	2.51291	2.55564	2.95175	2.67976	2.76403	3.00667	3.00203	2.75993	3.14383	2.76162	2.78965	2.42679	2.65373	2.64268	3.25315	3.03852	2.93225	2.82519
sp|O88712-2|CTBP1_MOUSE;sp|O88712|CTBP1_MOUSE	4	DVATVAFC[+57.0214635]DAQSTQEIHEK;GAALDVHESEPFSFSQGPLK;GETLGIIGLGR;VLNEAVGALMYHTITLTR		-0.962366	-0.749327	-0.684405	0.178762	-0.220399	-0.332789	-0.0884855	0.38272	0.305	-0.714148	-0.482378	-1.09272	-0.337696	0.100382	0.0152748	0.331084	-0.377086	0.423472	-0.676943	-0.465381	-0.490599	0.181619	-0.188186	0.0611812	0.429802	0.645874	0.575897
sp|Q91V12-2|BACH_MOUSE;sp|Q91V12-4|BACH_MOUSE;sp|Q91V12|BACH_MOUSE	7	ATLWYVPLSLK;HSVEVQVHVMSENILTGTK;IMRPDDANVAGNVHGGTILK;MIEEAGAIISTR;SMEIEVLVDADPVVDNSQKR;TNIVTASVDAINFHDKIR;VLEVPPIVYLR		4.2493	4.40309	4.59185	3.18369	3.25663	3.22727	2.07464	2.28177	2.29604	4.28501	4.3989	4.83837	3.09958	3.04678	3.03187	1.43044	1.72583	1.38745	4.43324	4.52572	4.52708	3.34763	3.50029	3.44241	2.02923	2.3976	2.52231
sp|O88653|LTOR3_MOUSE	3	ELAPLFEELIK;LPSVEGLHAIVVSDR;VANDSAPEHALRPGFLSTFALATDQGSK		0.247359	0.302986	0.638251	-0.220068	0.267707	0.376757	0.480531	0.57635	0.766281	0.352523	0.221861	0.75709	-0.139965	0.127146	0.203151	0.643526	0.560292	0.903914	0.0795979	0.330501	0.425139	-0.151601	0.130898	0.180557	0.395796	0.225011	0.560801
sp|Q8VCN5|CGL_MOUSE	12	AGDEIIC[+57.0214635]MDEVYGGTNR;ATLGINDTLIR;AVVLPISLATTFK;AVVLPISLATTFKQDFPGQSSGFEYSR;FLQNSLGAVPSPFDC[+57.0214635]YLC[+57.0214635]C[+57.0214635]R;LADIGAC[+57.0214635]AQIVHK;LLEAAITPQTK;LSVGLEDEQDLLEDLDR;LVWIETPTNPTLK;QC[+57.0214635]SGC[+57.0214635]PGMVSFYIK;QDFPGQSSGFEYSR;VVYPGLPSHPQHELAK		5.42415	5.39424	5.59718	2.94352	3.05144	3.05154	1.27253	1.2181	1.32146	5.3809	5.38904	5.65574	2.85554	2.77172	2.74067	0.508611	0.913648	0.784776	5.02343	5.28062	5.26544	2.73304	2.95309	3.17502	1.36881	1.43661	1.35778
sp|Q91WC0|SETD3_MOUSE	4	AEELFLWVPR;AGIPTSSVFALHSTEPPISAQLLAFLR;C[+57.0214635]SSPAPSPGKEWEEYTQIR;EILNLTSELLQK		0.202397	0.607957	0.568011	0.134352	-0.120543	-0.216043	-0.0569618	-0.217394	-0.233219	0.575088	0.662833	0.845852	0.0790636	-0.138369	-0.260956	-0.00537505	-0.03788	0.269268	0.734991	0.602184	0.762191	0.272275	-0.0839884	-0.283783	-0.0403338	-0.0703442	0.16678
sp|Q810V0|MPP10_MOUSE	5	KPWQLQGEVTAQK;LDALSNFHFIPKPPVPEIK;LSLAEIYEQEYLK;MAPVITEETTLHLEDIIK;TEEEDNPEHVEIQK		1.36145	1.25395	1.38009	-0.281448	-0.540029	-0.989199	-1.29476	-0.720878	-0.905173	1.26924	1.30042	1.95855	-0.181535	-0.38569	-0.584697	-0.993223	-1.04183	-0.577601	1.32509	1.22596	1.38258	-0.153588	-0.79536	-0.00470795	-1.28123	-0.815136	-0.741283
sp|Q8K363|DDX18_MOUSE	19	ELAMQTFGVLK;ELMTHHVHTYGLIMGGSNR;FLLLFTFLK;GHALLILRPEELGFLR;ILDVGFEEELK;ILDVGFEEELKQIIK;LLDHMQNTPGFMYK;LLNGINIIVATPGR;LTTLANGEAAPTPPPDSEVKK;MANDAGPDTK;MANDAGPDTKK;NGTGVLILSPTR;NLQC[+57.0214635]LVIDEADR;QTMLFSATQTR;TEESAEAC[+57.0214635]EEPEDDVK;TEESAEAC[+57.0214635]EEPEDDVKK;TLAFLIPVIELIVK;VPLNQFDFSWSK;VSDIQSQLEK		5.28959	5.38707	5.27852	4.14389	4.02453	4.17667	3.14268	2.9438	3.12092	5.29432	5.26233	5.18314	4.07968	3.98742	3.82728	3.21244	2.96379	3.18245	5.20413	5.17621	5.13712	4.27418	4.04704	4.01447	3.12024	3.32469	3.14598
sp|Q9D0B6|PBDC1_MOUSE	3	FEGIVEDYNYGTLLR;LDC[+57.0214635]SQGYTEENTIFAPR;VDDQIYSEFR		2.30799	2.15018	2.28394	1.10591	0.916376	0.912609	1.06762	0.992444	0.932788	2.18105	2.16127	2.16986	0.998191	0.972473	1.17856	1.22667	0.8434	1.09853	2.37602	2.14215	2.17641	1.35796	0.912446	0.913114	1.16904	0.876069	0.806116
sp|O70503|DHB12_MOUSE	10	AFQVWC[+57.0214635]VGNEALVGPR;AFVDFFSQC[+57.0214635]LHEEYK;GIFVQSVMPYLVATK;IQKPTLDKPSAETFVK;LGEWAVVTGGTDGIGK;LININVLSVC[+57.0214635]K;LNQVSNNIK;LVLPGMVER;SQDKLNQVSNNIK;TIAVDFSLDDIYDKIK		3.9012	3.99647	3.96809	3.52319	3.851	3.60168	3.5783	3.51266	3.75397	3.92534	3.77522	3.77112	3.71752	3.59222	3.78842	3.62084	3.89309	3.50597	3.77186	3.88934	3.92155	3.70597	4.04408	3.87871	3.79141	3.76299	3.711
sp|Q8BZH4|POGZ_MOUSE	14	AYANHMINNHVPR;DSGYSDDEIMELWSTR;EQQLPVNEETLFQK;FQASQGENLEGK;LAC[+57.0214635]TSC[+57.0214635]TFATSVGDAMAK;LAEWVLIQR;LIMLVDDFYYGR;LQFLFAK;NADMQEELIASLEEQLK;SFLVASVLPGPDGNVNSPTR;SMLVMDC[+57.0214635]HR;SSLYSEVDVHFR;VPEPNENAGDAVQTK;VTSSIPVFDLQDGGR		2.34279	2.30347	2.22938	2.29392	2.25922	2.1039	1.85263	1.84206	1.81841	2.38848	2.33498	2.29326	2.4291	2.20168	2.15942	1.76584	1.70642	1.63971	2.04728	2.24481	2.15458	2.46269	2.35272	2.29572	1.82446	1.91706	1.81752
sp|O88986|KBL_MOUSE	9	ALDLLMESNAIIQSMAAK;C[+57.0214635]ILDSELEGIR;FIC[+57.0214635]GTQSIHK;GIFVIGFSYPVVPK;GTDELLGVMDQVTIINSTLGK;HLDMADLEAK;LAAQYGALVFVDEC[+57.0214635]HATGFLGPTGR;LSSQMADDMLKK;MEAAGFTVSGADHPIC[+57.0214635]PVMLGDAR		3.00187	2.9805	3.0201	3.05755	2.93605	2.81066	2.22456	2.10874	2.16351	2.9251	2.82521	2.68715	3.04955	2.80893	2.67283	1.80014	1.81254	1.89209	3.12419	3.21299	3.24095	2.93731	3.07403	2.91991	2.01142	2.21524	2.0934
sp|P40201|CHD1_MOUSE	8	DYQLNGLNWLAHSWC[+57.0214635]K;FNILLTTYEILLK;GWSHIHNTWETEETLK;ILPDDPDKKPQAK;KQPSYIGGHEGLELR;MLDILAEYLK;NASPEDVEYYNC[+57.0214635]QQELTDDLHK;TVLHTGSAPSSSTPFNK		-0.284265	0.129219	0.00938519	-0.238209	-0.351859	-0.188113	-0.75272	-0.768127	-0.59382	-0.000526325	-0.0348471	0.0931452	-0.1624	-0.647656	-1.40373	-1.04615	-0.75396	-0.630176	0.126531	-0.187254	-0.0209715	-0.271085	-0.502982	-1.5133	-0.985516	-0.597031	-0.389632
sp|Q99L04|DHRS1_MOUSE	10	AAC[+57.0214635]DRLAADC[+57.0214635]AHELR;AGATVYITGR;ATAQEAQSLGGR;C[+57.0214635]VPVVC[+57.0214635]DSSQESEVK;C[+57.0214635]VVALATDPNILNLSGK;EDTPEDPLFKK;GHYLC[+57.0214635]SVYGAR;GLIVIVSSPGGLQHMFNVPYGVGK;HGVSYVSLWPGLVQTEMVK;LAADC[+57.0214635]AHELR		1.28677	1.30946	1.50235	3.15653	2.90557	2.93667	3.29215	3.07108	3.1809	1.13921	1.03216	0.76514	3.33454	3.02715	2.93564	2.99156	2.9384	2.79322	1.02975	1.0786	1.12447	3.0401	3.21624	3.19	3.11812	3.30418	3.28083
sp|Q9D0M0|EXOS7_MOUSE	8	C[+57.0214635]VEVETDVVSNTSGSAR;DIELSDDPYDC[+57.0214635]IR;GGDDLGTEIANTLYR;GSLDPESIFEMMESSK;GSLDPESIFEMMESSKR;LSVENVPC[+57.0214635]IVTLC[+57.0214635]K;VLEDEEGAKDIELSDDPYDC[+57.0214635]IR;VLHVSLQSLLHK		2.6036	2.66214	2.79804	1.69629	2.0016	1.70747	1.49433	1.47631	1.53796	2.5169	2.36167	2.19171	1.69429	1.93821	2.13163	1.53398	1.56317	1.49419	2.30578	2.35634	2.5343	1.38966	2.05508	2.11659	1.31691	1.33548	1.49734
sp|P35601-2|RFC1_MOUSE;sp|P35601|RFC1_MOUSE	16	AADSIC[+57.0214635]DGDLVDNQIR;AKEESSYNETELLAAR;AVVAESLNNTSIK;DALVRPLTSQGVEGAQHVIK;EDFENIMEVSSWGGKPSAFSK;ENGVSTNSYLGTSNVK;GFYTSGAAPSVSAR;GGIQELIGLIK;GYMTQFPSFPSWLGK;HALIMDEVDGMAGNEDR;ILDEDGLLDLIR;IPIIC[+57.0214635]MC[+57.0214635]NDR;IVQDLSLHMSLR;LTPTSVLDYFGTESVQR;NIIGQQGDQSC[+57.0214635]ANK;TVNMDYLSHIR		3.16467	3.12738	3.20365	2.23897	2.55983	2.41334	1.46395	2.27138	2.45467	2.99481	2.97994	3.15717	2.38213	2.61347	2.51598	2.6538	2.64256	3.23612	2.69649	2.94465	3.09813	2.2051	2.61082	2.27683	1.5523	3.00395	2.52564
sp|Q9CZW5|TOM70_MOUSE	13	AAAFEQLQK;ASPALGSGHHDGSGDSLEMSSLDR;ATFYLLIGSANAAKPDLDK;C[+57.0214635]IDLEPDNATTYVHK;GLLQLQWK;NVDLSTFYQNR;QAYTANNSSQVQAAMK;QYMEEENYDK;QYMEEENYDKIISEC[+57.0214635]SK;SEMEMAHLYSLC[+57.0214635]DAAHAQTEVAK;SYFSSFTDDIISQPMLK;YGLKPPTL;YMAEALLLR		3.39729	3.39213	3.13252	2.3415	2.49819	2.4931	2.56074	2.74498	2.68109	3.4649	3.57889	3.58576	2.16016	2.43279	2.73682	2.87109	2.76791	2.80214	3.64337	3.35081	3.46417	2.81604	2.24604	2.61312	2.96416	2.52855	2.65105
sp|Q6PGF7|EXOC8_MOUSE	1	EISYLESEMYQLSHLLTEQK		-3.86165	-3.73285	-3.64587	-4.39178	-3.55644	-3.68662	-3.38884	-3.03508	-3.47094	-3.6174	-3.64946	-3.0934	-3.63576	-3.02497	-3.86544	-3.15189	-2.45618	-2.83102	-3.66291	-3.45102	-3.22507	-3.32858	-3.26743	-4.91139	-2.97834	-2.84316	-2.81108
sp|Q8K411-2|PREP_MOUSE;sp|Q8K411|PREP_MOUSE	21	AFSSLNTLPEDLRPIVPLFC[+57.0214635]SVLTK;C[+57.0214635]SVNATPQQMPQAEK;DPNSIETLQSFGK;EFHITC[+57.0214635]GPDSLATETAK;ELDFWQEGWR;FFTYGNFQLEGHLK;GLELQTQQSK;IAEMTDIKPILR;IFSQHLQNK;IHGFTVNQVTPVPELFLTAVK;LEQSTAVPAQPHWDKPR;LGC[+57.0214635]GILNYR;LSVFSTVDSPVAPSDK;LTLSMKPDDKYYEK;MTAQELSNGISDSGHLYAALR;QFHATHYHPSNAR;QTQMETEKLEQK;TLTPSGDLQETFSGMDQVK;TTPMDSTGVPHVLEHTVLC[+57.0214635]GSQK;TVPYADPDHASLK;VSDIEPSMPFTK		3.76278	3.71461	3.85758	3.63298	3.54901	3.40336	3.44204	3.45206	3.45723	3.76305	3.68068	3.74258	3.71869	3.54613	3.67738	3.5073	3.66219	3.53549	3.71274	3.74861	3.77403	3.61134	3.73886	3.78498	3.41221	3.39907	3.44246
sp|Q9R1J0|NSDHL_MOUSE	6	C[+57.0214635]TVIGGSGFLGQHMVEQLLER;DPQLVPILIDAAR;GQVTGTHLTNDISK;GVSTVFHC[+57.0214635]ASPPPYSNNK;GYTVNVFDIHQGFDNPR;NGTEDLPYAMKPIDYYTETK		1.68866	1.81048	2.07376	2.65491	2.78182	2.76355	1.80765	1.98563	2.14707	1.88361	1.85631	2.08161	2.80659	2.75177	2.60195	1.63635	1.80935	1.83206	1.61636	1.84819	1.73302	2.81785	2.90787	2.71024	2.24394	2.14876	2.21439
sp|Q9R097|SPIT1_MOUSE	4	EGFINYLTQELYR;GYC[+57.0214635]AELPDTGFC[+57.0214635]K;NNFEEEQQC[+57.0214635]LESC[+57.0214635]R;YTSGFDELQNIHFLSDK		-2.25795	-1.97957	-2.11907	-1.03369	-1.07687	-0.944141	-1.01387	-1.34882	-1.14024	-2.09603	-2.50584	-2.58083	-1.39238	-1.04781	-1.25894	-1.87779	-2.58269	-2.29186	-2.50923	-2.20247	-1.90092	-0.964326	-1.02736	-1.29595	-0.765876	-0.853991	-0.723898
sp|Q8K0B2-2|LMBD1_MOUSE;sp|Q8K0B2-3|LMBD1_MOUSE;sp|Q8K0B2|LMBD1_MOUSE	1	LENTEDIEEVEQHIQTIR		-5.11518	-4.82273	-5.96016	-1.87345	-2.1816	-2.54908	-2.1646	-1.30235	-1.40597	-6.31366	-5.53039	-4.61645	-1.79447	-1.44114	-1.37467	-1.15444	-0.561437	-0.729534	-4.8402		-4.26502	-2.23393	-1.85749	-1.48382	-1.6494	-1.43392	-1.58728
sp|A2A432|CUL4B_MOUSE	27	AFGSTIVINPEK;AFGSTIVINPEKDK;C[+57.0214635]WQNHC[+57.0214635]R;DSASPSTSSFC[+57.0214635]LGVPVATSSHVPIQK;EAFETFINK;EATDEELEK;EAVEAIQNSTSIK;ETVEEQASTTER;EVPEYLHHVNK;EVPEYLHHVNKR;FEDTLEFVGIDTK;GGVQVLLQQWIEYIK;GLNSLLDENR;GLNSLLDENRIQDLSLLYQLFSR;HATGIEDGELR;HATGIEDGELRR;IQDLSLLYQLFSR;LITYLDQTTQK;LKEAVEAIQNSTSIK;LPENYTDETWQK;SATDGNTSTTPPTSAK;SILISSVASVHHANGLAK;SSTAVSSFANSKPGSAK;TIDGILLLIER;TLSHNLLVSEVYNQ…		4.81184	4.84681	4.87138	5.21398	4.94663	5.15938	4.34458	4.37953	4.38299	4.79121	4.82853	4.95718	4.93633	4.64313	4.71386	4.40968	4.30202	4.48762	4.89325	4.8297	4.84053	5.08577	4.84922	5.11056	4.34904	4.18991	4.35691
sp|Q9D7H3|RTCA_MOUSE	8	AFVAGVLPLK;DLYVSIQPVQEAR;DTYVIEC[+57.0214635]EGIGMANPHL;FGFTFNC[+57.0214635]DIK;GGTNAEMAPQIDYTMMVFKPIAEK;VEVDGGIMEGGGQILR;VGIEAAEMLLANLR;VSTALSC[+57.0214635]LLGLPLR		2.67511	2.64946	2.72688	2.79311	2.95501	2.66923	2.84963	2.72768	2.86886	2.68912	2.43711	2.4263	2.94402	2.76894	2.74578	2.93582	2.78521	2.72345	2.32998	2.30199	2.45376	2.61059	2.94011	2.84082	2.72652	2.80343	2.67302
sp|P17427|AP2A2_MOUSE	21	AKHPMDTEITK;AVDLLYAMC[+57.0214635]DR;EMAEAFAGEIPK;FFQPTEMASQDFFQR;FVNLFPEVK;GPSTVTDLEETKR;HPMDTEITK;IIGFGSALLEEVDPNPANFVGAGIIHTK;ILVAGDTMDSVK;LTEC[+57.0214635]LETILNK;MFIFYGNK;NAVLFEAISLIIHHDSEPNLLVR;NNGVLFENQLLQIGLK;NPTFMGLALHC[+57.0214635]IANVGSR;QLSNPQQEVQNIFK;SSPLIQFNLLHSK;THIETVINALK;TSPDLVPMGDWTSR;TTQIGC[+57.0214635]LLR;TVFEALQAPAC[+57.0214635]HENLVK;YGGTFQNVSVK		4.72493	4.79375	4.77939	4.7885	4.89748	4.88055	4.77815	4.81848	4.86388	4.65463	4.69487	4.68988	5.026	4.85637	4.98333	5.28314	5.45697	5.33227	4.46694	4.73927	4.70656	4.64524	4.85604	4.77883	4.62205	4.55673	4.5132
sp|P97447|FHL1_MOUSE	4	C[+57.0214635]SVNLANKR;FTAVEDQYYC[+57.0214635]VDC[+57.0214635]YK;FVFHNEQVYC[+57.0214635]PDC[+57.0214635]AK;GSSVVAYEGQSWHDYC[+57.0214635]FHC[+57.0214635]K		-1.60926	-1.94089	-2.05108	0.549926	0.147153	0.07914	0.442037	-0.343618	0.15059	-2.20738	-2.57803	-3.75069	0.269263	0.189677	0.0382987	0.182305	-0.960365	-0.0677737	-4.33597	-3.7334	-3.8004	-0.402777	-0.187237	-0.26808	-0.0104344	-0.276816	-0.388358
sp|P33609|DPOLA_MOUSE	15	AGDTVSYVIC[+57.0214635]QDGSNLTATQR;DTGNFVIGQILSDQSR;EIFDDDLEDDALDTC[+57.0214635]GK;FEVMALKPDLVNVIK;LDNLAIDTQYYLAQQIHPVVAR;LGDEDEEIDGDTNK;LTANSMYGC[+57.0214635]LGFSYSR;MIC[+57.0214635]DVEISAK;NGPLC[+57.0214635]PVC[+57.0214635]MK;NPQLLNQPISWC[+57.0214635]K;NYAFEIPDVPEKSEYLEVR;TLIGFFLAK;TWDQETEPVER;YAALVVEPTSDGNYITK;YSAEVPQLPQNLK		3.17469	3.22128	3.35368	1.84972	1.78094	1.90965	1.10873	1.14905	1.17129	3.10798	3.24141	3.38924	1.76897	1.61515	1.62614	0.774068	0.739892	0.789898	3.32024	3.35142	3.2635	1.76635	1.86883	2.00945	0.983264	1.34463	1.48582
sp|P60762-2|MO4L1_MOUSE	2	IPEELKPWLVDDWDLITR;VDPTVENEETFMNR		0.0154027	-0.147951	-0.253754	-0.825659	-1.16087	-1.1034	-1.6178	-1.53811	-1.26316	-0.246283	0.432251	0.269283	-1.43262	-1.12056	-1.03727	-1.83186	-3.82195	-1.54086	0.625802	0.339756	0.161536	-0.29632	-1.27948	-1.39599	-1.1517	-1.16429	-1.06664
sp|Q9QYC0|ADDA_MOUSE	12	GSDSIAYDKGEK;LADLFGWSQLIYNHITTR;QDFNMMEQK;SPGTPAGEGSGSPPK;TAGPQSQVLC[+57.0214635]GVMMDR;TLASAGGPDNLVLLDPGK;TSTSAVPNLFVPLNTNPK;VNLQGDIVDR;VSMILQSPAFC[+57.0214635]EELESMIQEQFKK;WQIGEQEFEALMR;YFDRVDENNPEYLR;YSDVEVPASVTGHSFASDGDSGTC[+57.0214635]SPLR		1.64114	1.34025	1.65318	2.91706	2.74103	2.83329	3.34305	3.37845	3.1985	1.49743	1.52175	1.66939	2.96413	2.85308	2.91467	3.27576	3.25784	3.24792	1.48793	1.62264	1.54713	2.83889	2.87409	3.01571	3.28115	3.4292	3.52015
[truncated: 4,134 more rows]
