# Supplementary material for: Multi-omic profiling of histone variant H3.3 lysine 27 methylation reveals a distinct role from canonical H3 in stem cell differentiation
Source: Royal Society of Chemistry journal article supplement (doi:10.1039/d1mo00352f), 2022-01-12
Supplement: d1mo00352f10.xlsx [file d1mo00352f10.xlsx]

## Sheet: Day0_K27AvsKOcontrol
	baseMean	log2FoldChange	lfcSE	stat	pvalue	padj
0610005C13Rik	8.78212	0.743887	1.08613	0.684897	0.493409	NA
0610007P14Rik	1020.01	0.152489	0.162019	0.941179	0.346613	0.992451
0610009B22Rik	722.908	0.164037	0.140241	1.16968	0.242129	0.959035
0610009L18Rik	13.2865	0.3297	0.847787	0.388895	0.697354	NA
0610009O20Rik	1334.98	0.0422302	0.139642	0.302418	0.762333	0.997916
0610010B08Rik	0	NA	NA	NA	NA	NA
0610010F05Rik	0	NA	NA	NA	NA	NA
0610010K14Rik	997.62	-0.0198132	0.175073	-0.113171	0.909895	0.997916
0610011F06Rik	463.255	0.0941513	0.193618	0.486274	0.626773	0.997916
0610012G03Rik	526.37	-0.0652718	0.19915	-0.327751	0.7431	0.997916
0610030E20Rik	568.948	-0.166338	0.15663	-1.06198	0.288243	0.973331
0610031O16Rik	0	NA	NA	NA	NA	NA
0610037L13Rik	0.906206	-1.29254	3.45733	-0.373855	0.708512	NA
0610038B21Rik	8.66921	0.00473845	1.13517	0.00417423	0.996669	NA
0610039H22Rik	0.368482	2.8885	4.88373	0.591454	0.554216	NA
0610039K10Rik	4.03436	-0.512689	1.31679	-0.389348	0.697019	NA
0610040B10Rik	24.2917	-0.726889	0.692513	-1.04964	0.293884	NA
0610040F04Rik	37.7785	-0.00741427	0.461764	-0.0160564	0.987189	1
0610040J01Rik	126.865	-0.129347	0.4324	-0.299138	0.764835	0.997916
0610043K17Rik	6.31738	0.460787	1.14618	0.40202	0.687669	NA
1010001N08Rik	87.8044	-2.41286	0.966083	-2.49757	0.0125048	0.255508
1110001J03Rik	310.942	-0.0137536	0.2084	-0.0659963	0.947381	0.997916
1110002L01Rik	595.384	-0.125615	0.153311	-0.819346	0.412589	0.997916
1110004E09Rik	824.377	-0.158275	0.165304	-0.957477	0.338327	0.991996
1110004F10Rik	1897.39	0.0748057	0.134224	0.557318	0.57731	0.997916
1110006O24Rik	27.8885	0.604414	0.645802	0.935912	0.349318	NA
1110008F13Rik	2376.32	0.073726	0.150057	0.491319	0.623201	0.997916
1110008L16Rik	798.588	0.0859211	0.134868	0.637075	0.524076	0.997916
1110008P14Rik	318.543	-0.000541336	0.223176	-0.0024256	0.998065	1
1110012L19Rik	320.236	-0.0169544	0.224717	-0.0754478	0.939858	0.997916
1110015O18Rik	0	NA	NA	NA	NA	NA
1110017D15Rik	0.977012	1.27755	2.88764	0.442422	0.658184	NA
1110019D14Rik	80.4972	-0.221037	0.334853	-0.660103	0.509188	0.997916
1110020A21Rik	7.37238	0.282307	1.1653	0.24226	0.808578	NA
1110025L11Rik	0.209303	0	4.99742	0	1	NA
1110028F11Rik	0.541918	0	4.62856	0	1	NA
1110028F18Rik	0.786765	2.1911	3.84498	0.56986	0.568773	NA
1110032A03Rik	190.617	0.361296	0.265723	1.35967	0.173933	0.887901
1110032F04Rik	36.4461	-0.872677	0.558548	-1.5624	0.118193	NA
1110034G24Rik	0.879871	1.72705	4.03967	0.427522	0.668999	NA
1110036E04Rik	0	NA	NA	NA	NA	NA
1110037F02Rik	0.184241	1.86273	4.98145	0.373934	0.708454	NA
1110038B12Rik	1335.39	-0.0565926	0.133148	-0.425035	0.670811	0.997916
1110038F14Rik	0	NA	NA	NA	NA	NA
1110046J04Rik	7.5054	1.42608	1.09769	1.29916	0.193889	NA
1110051M20Rik	309.184	-0.444741	0.234842	-1.89379	0.0582533	0.601283
1110058D11Rik	0	NA	NA	NA	NA	NA
1110059E24Rik	912.841	0.0206046	0.1426	0.144493	0.885112	0.997916
1110059G10Rik	372.818	0.239737	0.203515	1.17798	0.238804	0.956128
1110065P20Rik	6.01852	0.0137334	1.1241	0.0122173	0.990252	NA
1190002N15Rik	1005.35	-0.0497497	0.147416	-0.337478	0.735756	0.997916
1190003K10Rik	0	NA	NA	NA	NA	NA
1190005I06Rik	1.68322	-0.884347	2.08122	-0.424918	0.670896	NA
1190007I07Rik	220.225	0.071985	0.206355	0.34884	0.727209	0.997916
1300002E11Rik	223.326	-0.160316	0.240182	-0.667477	0.504468	0.997916
1300017J02Rik	10.6075	0.320191	0.799948	0.400265	0.688961	NA
1500004A13Rik	5.81429	-0.179877	1.35175	-0.13307	0.894138	NA
1500009C09Rik	13.308	-0.362372	0.747184	-0.484983	0.627688	NA
1500009L16Rik	701.594	0.415021	0.305731	1.35747	0.174631	0.887901
1500011B03Rik	386.165	-0.100033	0.201031	-0.497602	0.618765	0.997916
1500011K16Rik	274.844	-0.042099	0.194658	-0.216271	0.828776	0.997916
1500012K07Rik	0	NA	NA	NA	NA	NA
1500015A07Rik	161.872	-0.187197	0.237583	-0.787923	0.430742	0.997916
1500015L24Rik	0	NA	NA	NA	NA	NA
1500015O10Rik	7.20547	-0.410693	1.04255	-0.393931	0.693632	NA
1500017E21Rik	0.0899492	0	4.99742	0	1	NA
1500026H17Rik	5.68017	-0.692413	2.02669	-0.341648	0.732616	NA
1600002D24Rik	0.264784	-1.20649	4.98374	-0.242086	0.808714	NA
1600002H07Rik	940.066	-0.155294	0.26665	-0.582387	0.560306	0.997916
1600002K03Rik	73.8643	-0.191429	0.334764	-0.571834	0.567435	0.997916
1600010M07Rik	0	NA	NA	NA	NA	NA
1600012H06Rik	897.357	0.078908	0.15589	0.506177	0.612732	0.997916
1600014C10Rik	248.74	-0.262772	0.234778	-1.11924	0.263038	0.968291
1600014C23Rik	3.83728	0.15302	1.4694	0.104138	0.91706	NA
1600015I10Rik	0.110872	0	4.99742	0	1	NA
1600019K03Rik	0.523715	-1.19488	4.85534	-0.246097	0.805607	NA
1600020E01Rik	155.123	-0.27987	0.326556	-0.857036	0.391425	0.994455
1600023N17Rik	5.68505	0.741525	1.17604	0.630526	0.52835	NA
1600025M17Rik	4.01353	-1.14005	2.38635	-0.477739	0.632836	NA
1600027J07Rik	1.53871	0.316408	2.06544	0.153191	0.878247	NA
1600029I14Rik	0	NA	NA	NA	NA	NA
1600029O15Rik	4.99556	2.15841	1.56956	1.37517	0.169079	NA
1700001C02Rik	0.405984	1.86279	4.98145	0.373945	0.708445	NA
1700001C19Rik	1.97026	0	2.82867	0	1	NA
1700001D01Rik	0	NA	NA	NA	NA	NA
1700001F09Rik	0	NA	NA	NA	NA	NA
1700001G01Rik	0	NA	NA	NA	NA	NA
1700001G11Rik	9.26783	-0.00546593	0.912592	-0.00598945	0.995221	NA
1700001G17Rik	7.59769	0.269998	1.26558	0.213339	0.831063	NA
1700001J03Rik	1.40812	-1.20025	2.21853	-0.541012	0.5885	NA
1700001J11Rik	1.91746	-2.35815	2.45763	-0.95952	0.337297	NA
1700001K19Rik	0.195724	0	4.99742	0	1	NA
1700001K23Rik	0	NA	NA	NA	NA	NA
1700001L05Rik	1144.93	0.110694	0.125476	0.882193	0.377673	0.993357
1700001L19Rik	3.08091	0.376027	1.52904	0.245924	0.805741	NA
1700001O22Rik	36.0094	-0.142048	0.477247	-0.297642	0.765977	NA
1700001P01Rik	7.35654	0.298333	0.971698	0.307023	0.758826	NA
1700003C15Rik	0	NA	NA	NA	NA	NA
1700003D09Rik	0.295113	1.86277	4.98145	0.373941	0.708448	NA
1700003E16Rik	5.11611	-0.340882	1.22786	-0.277622	0.781303	NA
1700003E24Rik	0	NA	NA	NA	NA	NA
1700003F12Rik	7.30115	-0.415163	1.08272	-0.383443	0.701391	NA
1700003G13Rik	0	NA	NA	NA	NA	NA
1700003G18Rik	0.732263	1.80546	3.55196	0.508299	0.611244	NA
1700003H04Rik	0	NA	NA	NA	NA	NA
1700003I22Rik	0	NA	NA	NA	NA	NA
1700003L19Rik	0	NA	NA	NA	NA	NA
1700003M07Rik	32.1637	-0.153031	0.587587	-0.260439	0.794525	NA
1700003P14Rik	0.152365	1.72424	4.99054	0.345502	0.729717	NA
1700006A11Rik	0	NA	NA	NA	NA	NA
1700006E09Rik	0.123783	-1.08901	4.99157	-0.21817	0.827296	NA
1700006F04Rik	0.0899492	0	4.99742	0	1	NA
1700006H21Rik	0	NA	NA	NA	NA	NA
1700007B14Rik	0	NA	NA	NA	NA	NA
1700007F19Rik	0.217215	0	4.99742	0	1	NA
1700007G11Rik	3.67882	1.74356	2.44808	0.712215	0.476332	NA
1700007J10Rik	0.110872	0	4.99742	0	1	NA
1700007K09Rik	1.65071	-1.15971	2.83352	-0.409283	0.682332	NA
1700007K13Rik	155.074	0.215513	0.296441	0.726999	0.467227	0.997916
1700007L15Rik	49.8124	-0.421692	0.412467	-1.02236	0.306608	0.980367
1700007P06Rik	0	NA	NA	NA	NA	NA
1700008C04Rik	0.145431	-1.20651	4.98374	-0.24209	0.808711	NA
1700008J07Rik	100.798	0.250256	0.315112	0.794182	0.427089	0.997916
1700008K24Rik	0	NA	NA	NA	NA	NA
1700008O03Rik	29.5044	-0.763085	0.555535	-1.3736	0.169565	NA
1700008P02Rik	0	NA	NA	NA	NA	NA
1700009C05Rik	0	NA	NA	NA	NA	NA
1700009J07Rik	0	NA	NA	NA	NA	NA
1700009N14Rik	1.11467	0.38644	2.45792	0.157223	0.875069	NA
1700010B08Rik	0.110872	0	4.99742	0	1	NA
1700010D01Rik	0.455959	2.76833	4.78733	0.57826	0.563088	NA
1700010I02Rik	0	NA	NA	NA	NA	NA
1700010I14Rik	0.110872	0	4.99742	0	1	NA
1700010J16Rik	0	NA	NA	NA	NA	NA
1700010K23Rik	0	NA	NA	NA	NA	NA
1700011B04Rik	0.184241	1.86273	4.98145	0.373934	0.708454	NA
1700011C11Rik	0	NA	NA	NA	NA	NA
1700011E24Rik	0.480452	1.72615	4.28019	0.403288	0.686736	NA
1700011H14Rik	18.6824	0.329447	2.08164	0.158263	0.874249	NA
1700011I03Rik	0.533338	-1.09106	4.12971	-0.264198	0.791628	NA
1700011L22Rik	0	NA	NA	NA	NA	NA
1700011M02Rik	0	NA	NA	NA	NA	NA
1700012A03Rik	0	NA	NA	NA	NA	NA
1700012B07Rik	0.573943	0.196236	4.31754	0.0454508	0.963748	NA
1700012B09Rik	0.881968	0.315711	3.12548	0.101012	0.919541	NA
1700012C14Rik	2.99301	0.266212	1.47936	0.179951	0.857191	NA
1700012D01Rik	6.30021	0.825839	1.12084	0.736803	0.461242	NA
1700012D14Rik	5.81331	0.758999	1.24485	0.60971	0.542054	NA
1700012D16Rik	0	NA	NA	NA	NA	NA
1700012H19Rik	0	NA	NA	NA	NA	NA
1700012I11Rik	0	NA	NA	NA	NA	NA
1700012L04Rik	0.431808	-0.474881	4.88423	-0.0972273	0.922546	NA
1700012P22Rik	0	NA	NA	NA	NA	NA
1700013D24Rik	0.145431	-1.20651	4.98374	-0.24209	0.808711	NA
1700013F07Rik	1.69753	-0.680782	2.04715	-0.332551	0.739474	NA
1700013G24Rik	0.493363	0.315047	4.22033	0.0746499	0.940493	NA
1700013H16Rik	4.01139	1.74476	2.40166	0.726482	0.467543	NA
1700015E13Rik	0	NA	NA	NA	NA	NA
1700015F17Rik	0.844682	0.232402	3.06549	0.0758122	0.939569	NA
1700015G11Rik	0	NA	NA	NA	NA	NA
1700016C15Rik	0.209303	0	4.99742	0	1	NA
1700016D06Rik	2.37592	-0.911103	1.98409	-0.459205	0.646087	NA
1700016G22Rik	0.303594	1.86277	4.98145	0.373941	0.708449	NA
1700016H13Rik	2.43113	0.944953	1.67289	0.564861	0.572168	NA
1700016K19Rik	11.2841	0.0480161	0.780959	0.0614836	0.950974	NA
1700016L04Rik	0.627376	2.76758	3.78268	0.731645	0.464385	NA
1700016L21Rik	0	NA	NA	NA	NA	NA
1700016P04Rik	0.119353	0	4.99742	0	1	NA
1700017B05Rik	2438.41	0.0747701	0.193874	0.385664	0.699746	0.997916
1700017D01Rik	0	NA	NA	NA	NA	NA
1700017G19Rik	0	NA	NA	NA	NA	NA
1700017J07Rik	1.39976	-3.67731	2.50359	-1.46882	0.141882	NA
1700017L05Rik	0	NA	NA	NA	NA	NA
1700017N19Rik	0.119353	0	4.99742	0	1	NA
1700018A04Rik	0	NA	NA	NA	NA	NA
1700018B08Rik	0	NA	NA	NA	NA	NA
1700018B24Rik	1.96308	0.308081	2.32851	0.132308	0.894741	NA
1700018C11Rik	0	NA	NA	NA	NA	NA
1700018F24Rik	0	NA	NA	NA	NA	NA
1700018G05Rik	0	NA	NA	NA	NA	NA
1700018L02Rik	8.7338	1.56812	1.52025	1.03149	0.302311	NA
1700019A02Rik	6.89381	-3.12912	1.27981	-2.44498	0.0144861	NA
1700019B03Rik	0.969509	1.82034	3.06839	0.593257	0.553009	NA
1700019B21Rik	2.02763	-1.31523	2.33897	-0.562309	0.573905	NA
1700019C18Rik	0	NA	NA	NA	NA	NA
1700019D03Rik	250.697	-0.0911144	0.229122	-0.397668	0.690875	0.997916
1700019E08Rik	0.200821	0	4.99742	0	1	NA
1700019G24Rik	0	NA	NA	NA	NA	NA
1700019M22Rik	0	NA	NA	NA	NA	NA
1700019N19Rik	0.097862	0	4.99742	0	1	NA
1700019O17Rik	1.68226	0.684983	2.37425	0.288505	0.77296	NA
1700020A23Rik	0	NA	NA	NA	NA	NA
1700020D05Rik	9.87268	-0.443322	0.895162	-0.495242	0.620429	NA
1700020D14Rik	0	NA	NA	NA	NA	NA
1700020G17Rik	0	NA	NA	NA	NA	NA
1700020I14Rik	779.491	-0.0660337	0.13511	-0.488739	0.625027	0.997916
1700020L24Rik	2.8659	-0.457616	1.65894	-0.275848	0.782665	NA
1700020M21Rik	0.0899492	0	4.99742	0	1	NA
1700020N01Rik	4.33111	-0.64302	1.36981	-0.469421	0.638768	NA
1700020N15Rik	2.02699	1.40563	2.18467	0.643405	0.519961	NA
1700020N18Rik	0	NA	NA	NA	NA	NA
1700021F05Rik	652.088	-0.113587	0.179211	-0.633817	0.5262	0.997916
1700021F07Rik	0	NA	NA	NA	NA	NA
1700021N21Rik	0.364139	1.86278	4.98145	0.373944	0.708446	NA
1700022A21Rik	0	NA	NA	NA	NA	NA
1700022A22Rik	0	NA	NA	NA	NA	NA
1700022E09Rik	0.097862	0	4.99742	0	1	NA
1700022H01Rik	0.209303	0	4.99742	0	1	NA
1700022H16Rik	0	NA	NA	NA	NA	NA
1700022I11Rik	0	NA	NA	NA	NA	NA
1700023C21Rik	0	NA	NA	NA	NA	NA
1700023F02Rik	0	NA	NA	NA	NA	NA
1700023F06Rik	29.9835	0.591862	0.536773	1.10263	0.270188	NA
1700024B18Rik	0	NA	NA	NA	NA	NA
1700024F13Rik	10.7546	-0.620932	0.867283	-0.715951	0.474022	NA
1700024G13Rik	0.269214	-2.12598	4.89221	-0.434565	0.663878	NA
1700024I08Rik	0	NA	NA	NA	NA	NA
1700024N05Rik	0	NA	NA	NA	NA	NA
1700024P04Rik	0	NA	NA	NA	NA	NA
1700024P16Rik	4.03649	0.345263	1.36368	0.253184	0.800126	NA
1700025B11Rik	0.152365	1.72424	4.99054	0.345502	0.729717	NA
1700025C18Rik	0	NA	NA	NA	NA	NA
1700025F22Rik	0	NA	NA	NA	NA	NA
1700025F24Rik	0.145431	-1.20651	4.98374	-0.24209	0.808711	NA
1700025G04Rik	542.413	-0.0785246	0.18453	-0.425539	0.670444	0.997916
1700025J12Rik	0	NA	NA	NA	NA	NA
1700025K24Rik	0	NA	NA	NA	NA	NA
1700025M24Rik	0	NA	NA	NA	NA	NA
1700025N23Rik	0.097862	0	4.99742	0	1	NA
1700026D11Rik	0.123783	-1.08901	4.99157	-0.21817	0.827296	NA
1700026F02Rik	0.184241	1.86273	4.98145	0.373934	0.708454	NA
1700026J14Rik	1.08687	1.73302	3.11253	0.556788	0.577672	NA
1700027A15Rik	0	NA	NA	NA	NA	NA
1700027F06Rik	0	NA	NA	NA	NA	NA
1700027F09Rik	0	NA	NA	NA	NA	NA
1700027H10Rik	0	NA	NA	NA	NA	NA
1700027I24Rik	0.739832	-0.0324953	4.53006	-0.00717326	0.994277	NA
1700027J07Rik	0.372052	1.86279	4.98145	0.373946	0.708444	NA
1700028B04Rik	4.58565	0.374283	1.31635	0.284333	0.776155	NA
1700028D13Rik	0.119353	0	4.99742	0	1	NA
1700028E10Rik	4.84135	-0.37309	1.26221	-0.295584	0.767548	NA
1700028I16Rik	19.6979	0.0971143	0.645679	0.150406	0.880444	NA
1700028J19Rik	8.89946	-0.109531	0.889445	-0.123145	0.901992	NA
1700028K03Rik	1.84519	2.34237	2.26261	1.03525	0.300554	NA
1700028M03Rik	0.152365	1.72424	4.99054	0.345502	0.729717	NA
1700028P14Rik	0.179898	0	4.99742	0	1	NA
1700028P15Rik	0	NA	NA	NA	NA	NA
1700029B22Rik	0	NA	NA	NA	NA	NA
1700029F12Rik	4.32121	0	2.42296	0	1	NA
1700029H14Rik	0.777112	0.330855	3.41569	0.0968631	0.922835	NA
1700029I15Rik	6.04399	-0.297276	1.33224	-0.22314	0.823426	NA
1700029J03Rik	0	NA	NA	NA	NA	NA
1700029J07Rik	13.8701	0.296539	1.06799	0.277661	0.781272	NA
1700029M20Rik	5.60397	-0.274646	1.2384	-0.221776	0.824489	NA
1700029N11Rik	0	NA	NA	NA	NA	NA
1700029P11Rik	198.026	-0.114726	0.238116	-0.481808	0.629943	0.997916
1700030A11Rik	0	NA	NA	NA	NA	NA
1700030C10Rik	172.506	0.378672	0.238736	1.58615	0.112705	0.780966
1700030F04Rik	0	NA	NA	NA	NA	NA
1700030F18Rik	0	NA	NA	NA	NA	NA
1700030J22Rik	0	NA	NA	NA	NA	NA
1700030K09Rik	305.683	-0.245215	0.194782	-1.25892	0.20806	0.930884
1700030L20Rik	0	NA	NA	NA	NA	NA
1700030M09Rik	0.811516	-0.606445	3.59578	-0.168655	0.866068	NA
1700030N03Rik	0.508845	0.438422	4.18383	0.104789	0.916543	NA
1700030O20Rik	0.097862	0	4.99742	0	1	NA
1700031A10Rik	0.247567	-2.01715	4.90053	-0.411619	0.680619	NA
1700031F05Rik	1.02727	0	3.70322	0	1	NA
1700031M16Rik	0	NA	NA	NA	NA	NA
1700031P21Rik	0	NA	NA	NA	NA	NA
1700034E13Rik	0	NA	NA	NA	NA	NA
1700034G24Rik	0	NA	NA	NA	NA	NA
1700034H15Rik	16.6821	0.296749	0.860125	0.345006	0.73009	NA
1700034I23Rik	0	NA	NA	NA	NA	NA
1700034J05Rik	0	NA	NA	NA	NA	NA
1700034K08Rik	0.123783	-1.08901	4.99157	-0.21817	0.827296	NA
1700034O15Rik	0	NA	NA	NA	NA	NA
1700034P13Rik	6.53973	-0.129642	1.08641	-0.119331	0.905013	NA
1700036G14Rik	0	NA	NA	NA	NA	NA
1700037C18Rik	38.8777	0.130833	0.561561	0.232982	0.815776	0.997916
1700037H04Rik	1470.77	0.270577	0.167834	1.61218	0.106923	0.76596
1700039E15Rik	1.29893	1.43742	2.69678	0.533013	0.594025	NA
1700039E22Rik	0	NA	NA	NA	NA	NA
1700040L02Rik	1.03414	-1.17082	3.15155	-0.371508	0.71026	NA
1700041A01Rik	0	NA	NA	NA	NA	NA
1700041C23Rik	0.152365	1.72424	4.99054	0.345502	0.729717	NA
1700041M19Rik	0	NA	NA	NA	NA	NA
1700042G07Rik	0	NA	NA	NA	NA	NA
1700042G15Rik	1.64103	0	2.98222	0	1	NA
1700042O10Rik	18.9345	0.209744	0.666216	0.314829	0.752891	NA
1700044C05Rik	0.487835	2.88852	4.88373	0.591457	0.554214	NA
1700044K03Rik	0	NA	NA	NA	NA	NA
1700045H11Rik	0	NA	NA	NA	NA	NA
1700046C09Rik	0	NA	NA	NA	NA	NA
1700047A11Rik	0	NA	NA	NA	NA	NA
1700047E10Rik	0.238707	0	4.99742	0	1	NA
1700047G03Rik	0	NA	NA	NA	NA	NA
1700047I17Rik2	0	NA	NA	NA	NA	NA
1700047L14Rik	0	NA	NA	NA	NA	NA
1700047M11Rik	0	NA	NA	NA	NA	NA
1700048M11Rik	0	NA	NA	NA	NA	NA
1700048O20Rik	15.942	0.807878	0.764766	1.05637	0.290798	NA
1700049E15Rik	0.27776	0	4.99742	0	1	NA
1700049E22Rik	1.73865	-0.570495	2.35207	-0.242551	0.808354	NA
1700049G17Rik	133.845	-0.119443	0.323318	-0.369427	0.711809	0.997916
1700049L16Rik	0	NA	NA	NA	NA	NA
1700051A21Rik	0.758212	1.73052	3.40553	0.508148	0.611349	NA
1700052I22Rik	0	NA	NA	NA	NA	NA
1700052K11Rik	265.018	0.0321798	0.287617	0.111884	0.910915	0.997916
1700054A03Rik	0.780527	-1.09431	3.41552	-0.320393	0.74867	NA
1700054K19Rik	0	NA	NA	NA	NA	NA
1700054M17Rik	0.152365	1.72424	4.99054	0.345502	0.729717	NA
1700055C04Rik	0	NA	NA	NA	NA	NA
1700056E22Rik	17.494	-1.06362	1.15143	-0.923742	0.355621	NA
1700057G04Rik	0.315077	0	4.99742	0	1	NA
1700057H15Rik	0	NA	NA	NA	NA	NA
1700057H21Rik	8.66158	1.51655	1.02263	1.48299	0.138077	NA
1700060C16Rik	0	NA	NA	NA	NA	NA
1700060C20Rik	0.6402	3.39462	4.19178	0.809829	0.418039	NA
1700061F12Rik	0.209303	0	4.99742	0	1	NA
1700061G19Rik	262.771	0.265098	0.202139	1.31146	0.189702	0.911705
1700061I17Rik	0.380719	0	4.99742	0	1	NA
1700061J23Rik	0.110872	0	4.99742	0	1	NA
1700063A18Rik	0	NA	NA	NA	NA	NA
1700063D05Rik	0.499439	-2.1256	4.1267	-0.515085	0.606493	NA
1700063O14Rik	0	NA	NA	NA	NA	NA
1700064J06Rik	0	NA	NA	NA	NA	NA
1700064M15Rik	0.200821	0	4.99742	0	1	NA
1700065D16Rik	3.07284	1.64141	1.73523	0.945934	0.344182	NA
1700065I16Rik	0	NA	NA	NA	NA	NA
1700065J11Rik	0	NA	NA	NA	NA	NA
1700065J18Rik	0	NA	NA	NA	NA	NA
1700065L07Rik	0	NA	NA	NA	NA	NA
1700065O20Rik	0	NA	NA	NA	NA	NA
1700066B17Rik	0.250226	1.72425	4.99054	0.345504	0.729715	NA
1700066B19Rik	3.13581	-1.73597	2.06544	-0.840486	0.400636	NA
1700066J03Rik	0.097862	0	4.99742	0	1	NA
1700066M21Rik	264.552	0.0234798	0.215153	0.109131	0.913099	0.997916
1700066N21Rik	0	NA	NA	NA	NA	NA
1700066O22Rik	0	NA	NA	NA	NA	NA
1700067G17Rik	0	NA	NA	NA	NA	NA
1700067K01Rik	19.0987	0.165558	0.622911	0.26578	0.790408	NA
1700067P10Rik	0	NA	NA	NA	NA	NA
1700069L16Rik	0.499595	-2.22758	4.69518	-0.47444	0.635186	NA
1700069P05Rik	0	NA	NA	NA	NA	NA
1700071K01Rik	0.414466	1.8628	4.98145	0.373948	0.708443	NA
1700071M16Rik	0	NA	NA	NA	NA	NA
1700072B07Rik	0	NA	NA	NA	NA	NA
1700072I22Rik	0	NA	NA	NA	NA	NA
1700072O05Rik	0	NA	NA	NA	NA	NA
1700073E17Rik	0.152365	1.72424	4.99054	0.345502	0.729717	NA
1700074P13Rik	0	NA	NA	NA	NA	NA
1700080E11Rik	0	NA	NA	NA	NA	NA
1700080N15Rik	0	NA	NA	NA	NA	NA
1700080O16Rik	0.315077	0	4.99742	0	1	NA
1700081H04Rik	0	NA	NA	NA	NA	NA
1700083H02Rik	0	NA	NA	NA	NA	NA
1700084D21Rik	0.110872	0	4.99742	0	1	NA
1700084E18Rik	6.39409	0.416118	1.047	0.397439	0.691044	NA
1700084F23Rik	0	NA	NA	NA	NA	NA
1700084J12Rik	1.56383	-1.09768	2.40634	-0.456163	0.648273	NA
1700084M14Rik	0	NA	NA	NA	NA	NA
1700085C21Rik	0	NA	NA	NA	NA	NA
1700086L19Rik	2.59761	2.76359	2.34228	1.17987	0.238051	NA
1700086O06Rik	68.4857	0.518928	0.425833	1.21862	0.222989	0.940104
1700088E04Rik	36.8861	0.477803	0.617398	0.773897	0.438991	0.997916
1700091H14Rik	0	NA	NA	NA	NA	NA
1700092C02Rik	0	NA	NA	NA	NA	NA
1700092C10Rik	0.123783	-1.08901	4.99157	-0.21817	0.827296	NA
1700092E19Rik	0	NA	NA	NA	NA	NA
1700092K14Rik	0.123783	-1.08901	4.99157	-0.21817	0.827296	NA
1700092M07Rik	7.60213	-0.434633	1.00023	-0.434535	0.6639	NA
1700093K21Rik	1.4015	2.55208	2.62745	0.971316	0.331391	NA
1700094D03Rik	141.802	4.17142e-05	0.290708	0.000143492	0.999886	1
1700094J05Rik	0	NA	NA	NA	NA	NA
1700094M24Rik	0	NA	NA	NA	NA	NA
1700095A21Rik	0.097862	0	4.99742	0	1	NA
1700095B10Rik	0.145431	-1.20651	4.98374	-0.24209	0.808711	NA
1700095J12Rik	0	NA	NA	NA	NA	NA
1700096J18Rik	0	NA	NA	NA	NA	NA
1700096K18Rik	89.4275	0.639964	0.406712	1.57351	0.115601	0.787387
1700096P03Rik	0	NA	NA	NA	NA	NA
1700097N02Rik	62.6762	0.324796	0.408746	0.794616	0.426837	0.997916
1700099I09Rik	0	NA	NA	NA	NA	NA
1700100I10Rik	0.0899492	0	4.99742	0	1	NA
1700100L14Rik	0	NA	NA	NA	NA	NA
1700101I11Rik	1.59779	1.25462	2.65953	0.471744	0.63711	NA
1700101O22Rik	0	NA	NA	NA	NA	NA
1700102H20Rik	7.78623	0.203183	1.02162	0.198884	0.842354	NA
1700102P08Rik	15.6919	-0.767851	0.765726	-1.00278	0.315969	NA
1700104L18Rik	0.184241	1.86273	4.98145	0.373934	0.708454	NA
1700105P06Rik	1.70117	0.875233	2.20667	0.39663	0.69164	NA
1700108F19Rik	10.4283	0.953781	0.950589	1.00336	0.315688	NA
1700108J01Rik	0	NA	NA	NA	NA	NA
1700109G14Rik	0.583468	0.213462	4.04677	0.0527487	0.957932	NA
1700109G15Rik	0	NA	NA	NA	NA	NA
1700109H08Rik	18.8075	0.147388	0.690436	0.213471	0.83096	NA
1700109I08Rik	0	NA	NA	NA	NA	NA
1700109K24Rik	0	NA	NA	NA	NA	NA
1700110C19Rik	0.822396	-1.09304	3.64309	-0.30003	0.764154	NA
1700110I01Rik	0	NA	NA	NA	NA	NA
1700110I07Rik	0	NA	NA	NA	NA	NA
1700110K17Rik	1.41033	0.316424	2.82198	0.112128	0.910722	NA
1700111N16Rik	0.571224	-1.0913	4.05768	-0.268948	0.78797	NA
1700112E06Rik	6.80031	2.8074	2.0355	1.37922	0.167827	NA
1700112H15Rik	0.123783	-1.08901	4.99157	-0.21817	0.827296	NA
1700112J05Rik	0	NA	NA	NA	NA	NA
1700112J16Rik	5.09475	1.35841	2.08398	0.651834	0.514509	NA
1700113A16Rik	38.5833	0.284788	0.458365	0.621314	0.534393	0.997916
1700113B09Rik	0.893451	-0.343671	3.26724	-0.105187	0.916228	NA
1700113H08Rik	0.306596	0	4.99742	0	1	NA
1700116B05Rik	0.110872	0	4.99742	0	1	NA
1700119H24Rik	0	NA	NA	NA	NA	NA
1700120C14Rik	2.13317	0.907184	1.832	0.495188	0.620468	NA
1700120E14Rik	0	NA	NA	NA	NA	NA
1700120G07Rik	0	NA	NA	NA	NA	NA
1700120K04Rik	0.110872	0	4.99742	0	1	NA
1700121L16Rik	0	NA	NA	NA	NA	NA
1700121N20Rik	0.152365	1.72424	4.99054	0.345502	0.729717	NA
1700122C19Rik	0	NA	NA	NA	NA	NA
1700122O11Rik	0.851548	0.303761	3.44795	0.0880992	0.929798	NA
1700123I01Rik	13.6015	0.00470351	0.749491	0.00627561	0.994993	NA
1700123J17Rik	0	NA	NA	NA	NA	NA
1700123K08Rik	0.209303	0	4.99742	0	1	NA
1700123L14Rik	0	NA	NA	NA	NA	NA
1700123M08Rik	15.1107	-0.996228	0.765921	-1.30069	0.193364	NA
1700123O12Rik	0	NA	NA	NA	NA	NA
1700123O20Rik	959.944	0.0205203	0.162291	0.126442	0.899382	0.997916
1700123O21Rik	0	NA	NA	NA	NA	NA
1700124L16Rik	7.11649	-1.58375	1.31606	-1.20341	0.228819	NA
1700125G02Rik	0	NA	NA	NA	NA	NA
1700125G22Rik	1.29675	1.03125	2.77763	0.371269	0.710437	NA
1700125H03Rik	0.097862	0	4.99742	0	1	NA
1700125H20Rik	1.60231	0.52475	2.66706	0.196752	0.844021	NA
1700126H18Rik	0	NA	NA	NA	NA	NA
1700128A07Rik	0	NA	NA	NA	NA	NA
1700128F08Rik	0	NA	NA	NA	NA	NA
1700129C05Rik	0	NA	NA	NA	NA	NA
1810006J02Rik	0	NA	NA	NA	NA	NA
1810007C17Rik	0	NA	NA	NA	NA	NA
1810007D17Rik	0	NA	NA	NA	NA	NA
1810008I18Rik	0	NA	NA	NA	NA	NA
1810009A15Rik	2.83989	0.378756	1.61906	0.233937	0.815034	NA
1810009J06Rik	0	NA	NA	NA	NA	NA
1810010D01Rik	7.79845	-2.15787	2.01856	-1.06901	0.285063	NA
1810010H24Rik	48.2738	-0.11158	0.460403	-0.242353	0.808506	0.997916
1810011H11Rik	0.110872	0	4.99742	0	1	NA
1810011O10Rik	93.4569	0.283833	0.415002	0.683932	0.494018	0.997916
1810012K16Rik	3.61022	2.76246	2.18896	1.262	0.206949	NA
1810013A23Rik	0	NA	NA	NA	NA	NA
1810013L24Rik	1675.25	0.060551	0.138118	0.438401	0.661095	0.997916
1810014B01Rik	89.3647	-0.175729	0.299953	-0.585856	0.557973	0.997916
1810018F18Rik	0	NA	NA	NA	NA	NA
1810019D21Rik	74.9571	0.023855	0.476974	0.0500132	0.960112	0.997916
1810020O05Rik	8.42802	0.297349	1.03531	0.287206	0.773954	NA
1810021B22Rik	9.63572	-0.697395	1.10703	-0.629968	0.528715	NA
1810022K09Rik	0.303594	1.86277	4.98145	0.373941	0.708449	NA
1810024B03Rik	4.16485	0.893022	1.33829	0.667285	0.50459	NA
1810026B05Rik	447.593	0.199269	0.17063	1.16784	0.24287	0.959595
1810026J23Rik	1267.85	-0.00934272	0.123348	-0.075743	0.939624	0.997916
1810030O07Rik	987.674	0.0287909	0.13608	0.211574	0.83244	0.997916
1810032O08Rik	781.556	-0.103764	0.155766	-0.666151	0.505315	0.997916
1810034E14Rik	8.0712	0.88941	1.58603	0.560779	0.574948	NA
1810037I17Rik	1390.47	-0.225749	0.193934	-1.16405	0.244402	0.959891
1810041H14Rik	1.60418	1.17985	2.86278	0.412135	0.680241	NA
1810041L15Rik	0	NA	NA	NA	NA	NA
1810043G02Rik	240.589	-0.00964721	0.241735	-0.0399081	0.968166	0.997916
1810043H04Rik	214.744	0.00595983	0.260272	0.0228984	0.981731	0.999718
1810044D09Rik	37.5188	0.377128	0.510743	0.738391	0.460277	0.997916
1810046K07Rik	0.295113	1.86277	4.98145	0.373941	0.708448	NA
1810053B23Rik	0.119353	0	4.99742	0	1	NA
1810055G02Rik	0	NA	NA	NA	NA	NA
1810058I24Rik	1271.89	0.0362788	0.155047	0.233985	0.814997	0.997916
1810062G17Rik	5.13194	0.928873	1.785	0.520376	0.602801	NA
1810062O18Rik	3.75233	-1.62674	1.99979	-0.813453	0.415958	NA
1810063I02Rik	0.824806	-1.85679	3.77841	-0.49142	0.62313	NA
1810064F22Rik	1.69768	-1.17037	3.13774	-0.372999	0.709149	NA
1810065E05Rik	0.443958	-1.09029	4.39115	-0.248292	0.803909	NA
2010001A14Rik	40.6734	0.10441	0.499876	0.208871	0.834549	0.997916
2010003K11Rik	0.923437	4.06503	3.57832	1.13602	0.255949	NA
2010005H15Rik	2.8325	-2.21357	2.061	-1.07403	0.282811	NA
2010009K17Rik	0	NA	NA	NA	NA	NA
2010010A06Rik	2.38856	0.990877	1.85982	0.53278	0.594186	NA
2010016I18Rik	0.208734	0	4.99742	0	1	NA
2010106C02Rik	0	NA	NA	NA	NA	NA
2010106E10Rik	0	NA	NA	NA	NA	NA
2010107E04Rik	1673.42	-0.0618419	0.179319	-0.34487	0.730192	0.997916
2010107G12Rik	18.5785	0.418901	0.718182	0.58328	0.559705	NA
2010107G23Rik	0	NA	NA	NA	NA	NA
2010109A12Rik	1.71473	-2.04939	2.46717	-0.830665	0.406163	NA
2010109I03Rik	0.320174	0	4.99742	0	1	NA
2010111I01Rik	376.117	0.0521182	0.171833	0.303307	0.761656	0.997916
2010204K13Rik	561.796	-0.30253	0.231645	-1.30601	0.191549	0.915544
2010300C02Rik	116.214	0.262706	0.372202	0.705816	0.480303	0.997916
2010308F09Rik	2.38554	-0.362676	1.84726	-0.196332	0.844351	NA
2010310C07Rik	0.123783	-1.08901	4.99157	-0.21817	0.827296	NA
2010315B03Rik	164.592	0.0514293	0.404402	0.127174	0.898803	0.997916
2010320M18Rik	175.298	0.0517072	0.256325	0.201725	0.840131	0.997916
2200002D01Rik	163.913	-0.131997	0.426306	-0.30963	0.756842	0.997916
2200002J24Rik	1.33054	-1.26502	2.63335	-0.480382	0.630956	NA
2210010C04Rik	0	NA	NA	NA	NA	NA
2210011C24Rik	112.762	0.135443	0.286285	0.473107	0.636137	0.997916
2210013O21Rik	407.018	-0.274258	0.202322	-1.35555	0.175242	0.887901
2210016F16Rik	675.568	-0.0610906	0.196968	-0.310156	0.756443	0.997916
2210016L21Rik	888.567	0.204171	0.135249	1.5096	0.131145	0.824281
2210019I11Rik	2.04891	0	2.79507	0	1	NA
2210039B01Rik	3.48103	2.06709	1.6949	1.21959	0.22262	NA
2210404E10Rik	0.802018	-1.09242	3.77336	-0.289507	0.772193	NA
2210404O09Rik	168.857	0.27533	0.252823	1.08902	0.276143	0.970044
2210406O10Rik	7.67451	1.10854	1.05944	1.04635	0.2954	NA
2210407C18Rik	27.8452	0	2.11328	0	1	NA
2210408F21Rik	2.41478	-2.25804	2.1074	-1.07148	0.283953	NA
2210408I21Rik	134.89	-0.363765	0.261338	-1.39193	0.163944	0.877332
2210409D07Rik	0	NA	NA	NA	NA	NA
2210409E12Rik	662.552	0.40481	0.322524	1.25513	0.209431	0.931753
2210414B05Rik	0	NA	NA	NA	NA	NA
2210416O15Rik	1.65334	1.81988	3.12729	0.581933	0.560612	NA
2210417A02Rik	6.43902	1.32004	1.09908	1.20103	0.229738	NA
2210418O10Rik	0	NA	NA	NA	NA	NA
2210420H20Rik	0.739832	-0.0324953	4.53006	-0.00717326	0.994277	NA
2300002M23Rik	1.67783	0.992518	2.21844	0.447395	0.65459	NA
2300003K06Rik	0	NA	NA	NA	NA	NA
2300009A05Rik	83.4431	0.0185512	0.421814	0.0439797	0.964921	0.997916
2310001H17Rik	1.66433	0.316308	2.15743	0.146614	0.883437	NA
2310001K24Rik	0.38702	0.314755	4.98467	0.0631447	0.949651	NA
2310002D06Rik	0	NA	NA	NA	NA	NA
2310002F09Rik	7.79538	0.547085	1.30384	0.419597	0.67478	NA
2310002L09Rik	0	NA	NA	NA	NA	NA
2310003N18Rik	0	NA	NA	NA	NA	NA
2310005A03Rik	0	NA	NA	NA	NA	NA
2310005E17Rik	0.184241	1.86273	4.98145	0.373934	0.708454	NA
2310007B03Rik	6.85702	-0.996828	1.56797	-0.635743	0.524944	NA
2310008N11Rik	1.63508	-3.6779	2.40129	-1.53163	0.125614	NA
2310009A05Rik	192.362	0.0453831	0.260541	0.174188	0.861718	0.997916
2310009B15Rik	108.182	0.269545	0.324753	0.829998	0.40654	0.997916
2310010J17Rik	28.2442	0.0201037	0.518635	0.0387628	0.96908	NA
2310011J03Rik	565.496	0.00537702	0.181451	0.0296334	0.976359	0.999557
2310015A10Rik	211.848	-0.0337477	0.280531	-0.1203	0.904246	0.997916
2310015D24Rik	0.27419	1.86276	4.98145	0.37394	0.708449	NA
2310016D03Rik	0	NA	NA	NA	NA	NA
2310020H05Rik	0.097862	0	4.99742	0	1	NA
2310022A10Rik	1229.52	0.185362	0.159923	1.15908	0.246425	0.959891
2310022B05Rik	1654.72	0.0283485	0.136508	0.207669	0.835487	0.997916
2310030A07Rik	2.67735	-0.180853	1.96163	-0.0921952	0.926543	NA
2310030G06Rik	197.835	-0.149204	0.319765	-0.466604	0.640784	0.997916
2310033P09Rik	561.17	0.0379841	0.165516	0.229489	0.818489	0.997916
2310034C09Rik	0	NA	NA	NA	NA	NA
2310034G01Rik	19.0511	0.403109	0.650664	0.619534	0.535564	NA
2310034O05Rik	0	NA	NA	NA	NA	NA
2310035C23Rik	1091.53	-0.136225	0.141924	-0.959845	0.337133	0.991614
2310036O22Rik	2495.31	0.00212997	0.161796	0.0131646	0.989497	1
2310039H08Rik	146.191	-0.196337	0.294753	-0.666105	0.505344	0.997916
2310039L15Rik	2.12656	1.11425	1.77544	0.627588	0.530274	NA
2310040G24Rik	24.9015	-0.322776	0.553143	-0.583531	0.559536	NA
2310043L19Rik	0.097862	0	4.99742	0	1	NA
2310043O21Rik	0	NA	NA	NA	NA	NA
2310045n01rik-mef2b	0	NA	NA	NA	NA	NA
2310050C09Rik	0	NA	NA	NA	NA	NA
2310057J18Rik	0	NA	NA	NA	NA	NA
2310057M21Rik	0	NA	NA	NA	NA	NA
2310057N15Rik	0	NA	NA	NA	NA	NA
2310061I04Rik	658.246	0.160098	0.144402	1.1087	0.26756	0.969975
2310061N02Rik	0	NA	NA	NA	NA	NA
2310065F04Rik	0.0899492	0	4.99742	0	1	NA
2310068J16Rik	26.7212	0.0786353	0.561104	0.140144	0.888546	NA
2310069B03Rik	3.89655	0.113323	1.44649	0.0783432	0.937555	NA
2310069G16Rik	1.30712	-0.506286	2.51344	-0.201432	0.840361	NA
2310075C17Rik	0	NA	NA	NA	NA	NA
2310079G19Rik	0	NA	NA	NA	NA	NA
2310081J21Rik	0	NA	NA	NA	NA	NA
2400006E01Rik	128.809	0.0759265	0.254848	0.297929	0.765757	0.997916
2410002F23Rik	1486.01	0.0753795	0.150534	0.500746	0.61655	0.997916
2410003L11Rik	364.236	0.0674451	0.180035	0.374622	0.707942	0.997916
2410004B18Rik	0	NA	NA	NA	NA	NA
2410004I01Rik	4.10978	-0.159266	1.4002	-0.113745	0.90944	NA
2410004P03Rik	17.4163	-0.14157	0.651975	-0.21714	0.828099	NA
2410006H16Rik	1045.57	-0.0382253	0.142267	-0.268688	0.78817	0.997916
2410012E07Rik	2.51546	-0.334345	1.87979	-0.177863	0.858831	NA
2410015M20Rik	1148.78	-0.0986495	0.145428	-0.678341	0.497555	0.997916
2410016O06Rik	766.228	-0.0735413	0.191381	-0.384267	0.70078	0.997916
2410017I17Rik	6.31296	-1.17672	1.25154	-0.940219	0.347105	NA
2410018L13Rik	25.5909	0.504399	0.581886	0.866835	0.386032	NA
2410021H03Rik	5.35716	-0.748834	1.24736	-0.600333	0.548284	NA
2410089E03Rik	925.044	-0.170441	0.157442	-1.08257	0.279	0.970773
2410124H12Rik	10.8008	-3.05139	1.30765	-2.33348	0.0196229	NA
2410131K14Rik	386.997	-0.190545	0.18428	-1.034	0.301136	0.978817
2410137M14Rik	23.7382	0.198489	0.590969	0.33587	0.736969	NA
2410141K09Rik	439.485	0.147488	0.201277	0.73276	0.463705	0.997916
2500002B13Rik	179.291	0.329405	0.229356	1.43622	0.150941	0.857026
2500004C02Rik	103.026	0.200508	0.405232	0.494799	0.620742	0.997916
2510002D24Rik	374.767	0.024126	0.216842	0.11126	0.91141	0.997916
2510003B16Rik	14.0825	0.942981	0.8408	1.12153	0.262063	NA
2510009E07Rik	183.792	0.29165	0.426063	0.684523	0.493645	0.997916
2510039O18Rik	1491.74	-0.0479882	0.157806	-0.304097	0.761054	0.997916
2610002M06Rik	424.193	-0.444118	0.182525	-2.43319	0.0149662	0.285907
2610005L07Rik	3.85655	0.561949	1.50925	0.372337	0.709642	NA
2610008E11Rik	637.568	-0.496918	0.181546	-2.73714	0.00619756	0.164994
2610016A17Rik	2.21466	0	3.06545	0	1	NA
2610020C07Rik	31.6727	0.0635901	0.605802	0.104968	0.916401	NA
2610020H08Rik	212.233	-0.0303863	0.24298	-0.125057	0.900478	0.997916
2610027K06Rik	10.799	0	2.20757	0	1	NA
2610028E06Rik	2.65259	-0.626164	1.93914	-0.322909	0.746765	NA
2610028H24Rik	0.803121	-2.67752	3.17134	-0.844287	0.398509	NA
2610035D17Rik	102.527	0.300487	0.363565	0.826502	0.408519	0.997916
2610035F20Rik	4.1656	0.572251	1.58064	0.362037	0.717324	NA
2610037D02Rik	81.9206	-1.56553	0.36497	-4.28947	1.79101e-05	0.00186041
2610042L04Rik	5.70525	1.48417	1.23488	1.20187	0.229413	NA
2610044O15Rik8	201.944	-0.0776496	0.224221	-0.346308	0.729111	0.997916
2610100L16Rik	50.5739	2.73961	1.8628	1.4707	0.141373	0.840122
2610203C22Rik	0.592716	-1.08983	4.56783	-0.238588	0.811425	NA
2610206C17Rik	4.76661	-0.041832	1.42036	-0.0294516	0.976504	NA
2610301B20Rik	471.817	-0.29583	0.170205	-1.73808	0.0821972	0.689461
2610305D13Rik	3101.93	0.149324	0.115771	1.28982	0.197112	0.921977
2610306M01Rik	92.8911	-0.0151523	0.342251	-0.0442723	0.964687	0.997916
2610307P16Rik	18.8132	-0.832874	0.803949	-1.03598	0.300212	NA
2610316D01Rik	2.17449	0	2.85265	0	1	NA
2610318N02Rik	11.7051	-0.367077	0.84804	-0.432853	0.665121	NA
2610507B11Rik	9598.44	0.00682852	0.103781	0.0657972	0.947539	0.997916
2610507I01Rik	141.874	0.305329	0.327881	0.931221	0.351739	0.992451
2610524H06Rik	566.803	-0.25666	0.170223	-1.50779	0.131609	0.824461
2610528A11Rik	7.67643	-1.00667	1.35017	-0.745586	0.455917	NA
2610528J11Rik	63.4041	0.350315	0.375019	0.934126	0.350239	0.992451
2700029M09Rik	128.426	-0.103829	0.25598	-0.405614	0.685026	0.997916
2700038G22Rik	244.123	0.204639	0.198482	1.03102	0.30253	0.978817
2700046A07Rik	2.18753	-1.15276	2.6616	-0.433107	0.664937	NA
2700046G09Rik	56.8052	-0.0635999	0.553015	-0.115006	0.90844	0.997916
2700049A03Rik	1193.8	0.0181674	0.122351	0.148486	0.88196	0.997916
2700054A10Rik	16.6905	-0.323765	0.845086	-0.383115	0.701635	NA
2700060E02Rik	1924.89	-0.0208015	0.127911	-0.162625	0.870813	0.997916
2700062C07Rik	367.587	0.017355	0.172752	0.100462	0.919978	0.997916
2700069I18Rik	0.671304	1.84371	3.91387	0.471071	0.63759	NA
2700070H01Rik	0.54268	-0.48146	4.54463	-0.10594	0.91563	NA
2700081O15Rik	1097.2	0.290728	0.24028	1.20995	0.226296	0.943601
2700089I24Rik	0	NA	NA	NA	NA	NA
2700094K13Rik	3177.14	-0.169894	0.163285	-1.04047	0.298121	0.976305
2700097O09Rik	385.967	-0.0533528	0.179048	-0.29798	0.765718	0.997916
2700099C18Rik	341.157	-0.0925489	0.182732	-0.506472	0.612525	0.997916
2810001G20Rik	150.111	-0.231731	0.275599	-0.840827	0.400445	0.996743
2810002D19Rik	131.197	-0.118939	0.268259	-0.443374	0.657495	0.997916
2810004N23Rik	1912.91	-0.000974432	0.141539	-0.00688456	0.994507	1
2810006K23Rik	366.339	0.0133174	0.179012	0.0743941	0.940697	0.997916
2810013P06Rik	239.781	-0.0306662	0.226441	-0.135427	0.892274	0.997916
2810021J22Rik	348.077	0.0168531	0.18453	0.0913297	0.927231	0.997916
2810025M15Rik	975.392	-0.0487655	0.144238	-0.338092	0.735294	0.997916
2810029C07Rik	48.8084	0.162108	0.52125	0.310998	0.755802	0.997916
2810032G03Rik	6.33609	-1.21933	1.36705	-0.891942	0.372424	NA
2810047C21Rik1	0.699059	-1.09072	4.23837	-0.257345	0.796913	NA
2810049E08Rik	2.58123	0	2.71475	0	1	NA
2810403A07Rik	9.31685	0.308193	0.970763	0.317475	0.750883	NA
2810403D21Rik	34.4558	-0.0729796	0.562504	-0.129741	0.896772	NA
2810404M03Rik	0	NA	NA	NA	NA	NA
2810405F15Rik	0.311693	0	4.99742	0	1	NA
2810408A11Rik	243.909	-0.0908768	0.274331	-0.331267	0.740443	0.997916
2810408I11Rik	109.881	-0.0358348	0.302269	-0.118553	0.90563	0.997916
2810410L24Rik	85.826	0.836309	0.651866	1.28295	0.199511	0.923297
2810417H13Rik	1670.05	-0.00968879	0.169765	-0.0570716	0.954488	0.997916
2810428I15Rik	0	NA	NA	NA	NA	NA
2810429I04Rik	53.8679	-0.349365	0.416361	-0.839091	0.401418	0.997245
2810433D01Rik	6.58669	1.77732	2.27307	0.781903	0.434271	NA
2810442N19Rik	0.097862	0	4.99742	0	1	NA
2810454H06Rik	33.0425	0.0443536	0.605099	0.0732996	0.941568	NA
2810459M11Rik	73.2755	-0.627676	0.437494	-1.43471	0.151371	0.857792
2810468N07Rik	50.9072	-0.501875	0.527145	-0.952062	0.341066	0.992451
2810471M01Rik	0.097862	0	4.99742	0	1	NA
2810474O19Rik	5796.78	0.257212	0.115938	2.21853	0.0265187	0.405946
2900005J15Rik	9.78968	-1.43891	1.48531	-0.968761	0.332665	NA
2900009J06Rik	7.64984	-0.338192	0.973549	-0.34738	0.728306	NA
2900011O08Rik	264.937	0.17487	0.195428	0.894808	0.37089	0.993357
2900026A02Rik	0	NA	NA	NA	NA	NA
2900041M22Rik	47.9469	0.333663	0.50296	0.6634	0.507075	0.997916
2900052N01Rik	0.543812	1.72427	4.99054	0.345508	0.729713	NA
2900055J20Rik	1.49686	1.84581	2.64105	0.698894	0.484618	NA
2900057B20Rik	0.145431	-1.20651	4.98374	-0.24209	0.808711	NA
2900060B14Rik	3.6474	0.232284	1.42614	0.162876	0.870616	NA
2900076A07Rik	83.7655	0.465144	0.46323	1.00413	0.315315	0.985439
2900079G21Rik	0.455922	0	4.99742	0	1	NA
2900092C05Rik	0.097862	0	4.99742	0	1	NA
2900092D14Rik	20.3746	-0.67089	1.88855	-0.355242	0.722409	NA
2900097C17Rik	1679.56	-0.151743	0.120195	-1.26247	0.206778	0.930884
3000002C10Rik	64.2759	0.227416	0.415044	0.547932	0.583739	0.997916
3010001F23Rik	5.20907	0.348484	2.27404	0.153244	0.878206	NA
3010026O09Rik	265.272	0.122814	0.203665	0.603018	0.546496	0.997916
3100003L05Rik	0	NA	NA	NA	NA	NA
3110001I22Rik	175.337	0.300961	0.228839	1.31516	0.188456	0.911243
3110002H16Rik	801.987	-0.0332682	0.19986	-0.166457	0.867797	0.997916
3110009E18Rik	94.6003	0.218036	0.32657	0.667654	0.504355	0.997916
3110009F21Rik	0.097862	0	4.99742	0	1	NA
3110015C05Rik	0	NA	NA	NA	NA	NA
3110021A11Rik	4.94123	-0.586392	1.5098	-0.388392	0.697726	NA
3110035E14Rik	13.8552	-1.12885	2.17468	-0.51909	0.603698	NA
3110039I08Rik	138	0.248271	0.622856	0.398602	0.690187	0.997916
3110039M20Rik	0.443226	-0.824735	4.87786	-0.169077	0.865736	NA
3110040N11Rik	262.078	-0.159635	0.224614	-0.710707	0.477266	0.997916
3110043O21Rik	557.64	-0.262101	0.154239	-1.69933	0.0892579	0.715255
3110045C21Rik	16.3594	0.162078	0.701546	0.23103	0.817291	NA
3110052M02Rik	0	NA	NA	NA	NA	NA
3110056K07Rik	81.3683	-0.0162388	0.340468	-0.0476954	0.961959	0.997916
3110062M04Rik	28.018	-1.90253	0.937308	-2.02978	0.042379	NA
3110070M22Rik	13.7258	0.453147	0.871465	0.519983	0.603075	NA
3110079O15Rik	0	NA	NA	NA	NA	NA
3110082I17Rik	769.183	-0.328439	0.13601	-2.41481	0.0157432	0.296212
3110082J24Rik	0.896844	-1.17064	3.12839	-0.374199	0.708256	NA
3110099E03Rik	1.30221	0	3.19882	0	1	NA
3200001D21Rik	0	NA	NA	NA	NA	NA
3300002I08Rik	11.8839	-0.70371	0.980411	-0.71777	0.472899	NA
3300002P13Rik	14.3832	0.218295	0.796478	0.274076	0.784027	NA
3300005D01Rik	1.98031	1.78725	2.29918	0.777342	0.436957	NA
3425401B19Rik	2.0929	0.253547	1.8866	0.134394	0.893091	NA
3632451O06Rik	0	NA	NA	NA	NA	NA
3632454L22Rik	1.5232	-0.984635	2.11417	-0.465732	0.641407	NA
3830403N18Rik	52.0523	0.326272	2.05299	0.158925	0.873728	0.997916
3830406C13Rik	204.986	0.33339	0.250862	1.32897	0.183857	0.905248
3830408C21Rik	41.1299	-0.437494	0.521124	-0.839521	0.401177	0.997072
3830417A13Rik	50.5144	-0.98158	0.802659	-1.22291	0.221364	0.940104
3830432H09Rik	5.06496	1.33099	2.04513	0.650808	0.51517	NA
3930402G23Rik	1.18112	0	3.24299	0	1	NA
4430402I18Rik	10.8796	-0.259293	0.974702	-0.266023	0.790222	NA
4631405J19Rik	0.346252	-1.20648	4.98374	-0.242083	0.808716	NA
4632404H12Rik	62.8472	0.248157	0.376833	0.658533	0.510196	0.997916
4632415L05Rik	315.436	-0.191461	0.185724	-1.03089	0.302592	0.978817
4632427E13Rik	16.2507	0.579532	1.00197	0.578395	0.562997	NA
4632428C04Rik	14.9634	-0.781857	1.12259	-0.696474	0.486132	NA
4732416N19Rik	4.03722	1.1112	1.4356	0.774033	0.438911	NA
4732471J01Rik	17.1338	-0.0692525	0.757524	-0.0914195	0.927159	NA
4732490B19Rik	3.5378	0	2.52175	0	1	NA
4732491K20Rik	41.0191	-0.274217	0.654592	-0.418913	0.67528	0.997916
4831407H17Rik	0.187811	0	4.99742	0	1	NA
4831440E17Rik	51.4118	0.704337	0.48992	1.43766	0.150531	0.855952
4833411C07Rik	0.097862	0	4.99742	0	1	NA
4833412C05Rik	3.5398	-0.0239005	1.86369	-0.0128243	0.989768	NA
4833415N18Rik	0.119353	0	4.99742	0	1	NA
4833417C18Rik	39.487	-0.130645	0.45282	-0.288513	0.772954	0.997916
4833418N02Rik	16.0277	1.29136	1.12211	1.15083	0.249804	NA
4833419F23Rik	4.35234	1.47317	1.37793	1.06912	0.285014	NA
4833420G17Rik	1099.55	0.20892	0.142362	1.46752	0.142234	0.840615
4833422C13Rik	0.554956	3.22024	4.86356	0.662116	0.507897	NA
4833422M21Rik	0.834266	-1.66159	3.39903	-0.488844	0.624952	NA
4833423E24Rik	0	NA	NA	NA	NA	NA
4833427F10Rik	0	NA	NA	NA	NA	NA
4833427G06Rik	7.02363	-1.26125	1.88523	-0.669018	0.503484	NA
4833428L15Rik	1.39451	0.316494	2.78527	0.113631	0.90953	NA
4833439L19Rik	2768.8	0.11113	0.104492	1.06353	0.287541	0.973288
4921501E09Rik	0	NA	NA	NA	NA	NA
4921504A21Rik	5.45235	0.349314	2.28331	0.152986	0.87841	NA
4921504E06Rik	0.152365	1.72424	4.99054	0.345502	0.729717	NA
4921507P07Rik	42.6987	0.620118	0.514952	1.20423	0.228502	0.945307
4921508D12Rik	0.123783	-1.08901	4.99157	-0.21817	0.827296	NA
4921509C19Rik	0.097862	0	4.99742	0	1	NA
4921509O07Rik	0.414466	1.8628	4.98145	0.373948	0.708443	NA
4921511C10Rik	0.152365	1.72424	4.99054	0.345502	0.729717	NA
4921511C20Rik	0.123783	-1.08901	4.99157	-0.21817	0.827296	NA
4921511H03Rik	0	NA	NA	NA	NA	NA
4921511I17Rik	0	NA	NA	NA	NA	NA
4921511M17Rik	0	NA	NA	NA	NA	NA
4921513I03Rik	0.217215	0	4.99742	0	1	NA
4921515E04Rik	0.184241	1.86273	4.98145	0.373934	0.708454	NA
4921517D22Rik	0.250226	1.72425	4.99054	0.345504	0.729715	NA
4921518K17Rik	0	NA	NA	NA	NA	NA
4921524J17Rik	473.252	-0.235719	0.179531	-1.31297	0.189194	0.911691
4921524L21Rik	0	NA	NA	NA	NA	NA
4921525O09Rik	1.3779	1.90636	2.49252	0.764832	0.444372	NA
4921529L05Rik	0	NA	NA	NA	NA	NA
4921530L21Rik	0	NA	NA	NA	NA	NA
4921531C22Rik	34.8638	-0.422475	0.541025	-0.78088	0.434873	NA
4921531P14Rik	0	NA	NA	NA	NA	NA
4921533I20Rik	0.729729	0	3.7286	0	1	NA
4921534H16Rik	0	NA	NA	NA	NA	NA
4921536K21Rik	25.6005	-0.0329714	0.569577	-0.0578874	0.953838	NA
4921539E11Rik	0.297795	0.197224	4.97684	0.0396283	0.968389	NA
4922502D21Rik	0	NA	NA	NA	NA	NA
4922502H24Rik	0	NA	NA	NA	NA	NA
4922502N22Rik	0.110872	0	4.99742	0	1	NA
4930401C15Rik	0	NA	NA	NA	NA	NA
4930401O10Rik	0	NA	NA	NA	NA	NA
4930401O12Rik	0	NA	NA	NA	NA	NA
4930402F06Rik	0.145431	-1.20651	4.98374	-0.24209	0.808711	NA
4930402F11Rik	0	NA	NA	NA	NA	NA
4930402H24Rik	702.379	-0.0508817	0.177981	-0.285883	0.774968	0.997916
4930402K13Rik	0.453455	-0.584957	4.77953	-0.122388	0.902592	NA
4930404A05Rik	0	NA	NA	NA	NA	NA
4930404H11Rik	0.695228	0	4.25917	0	1	NA
4930404I05Rik	0.208734	0	4.99742	0	1	NA
4930404N11Rik	1.62308	-2.43517	2.40997	-1.01046	0.312277	NA
4930405A10Rik	0	NA	NA	NA	NA	NA
4930405A21Rik	7.08009	-0.511808	1.10118	-0.46478	0.642089	NA
4930405D11Rik	1.19413	0	3.23888	0	1	NA
4930405J17Rik	0	NA	NA	NA	NA	NA
4930405L22Rik	0	NA	NA	NA	NA	NA
4930405O22Rik	0.687975	-2.22112	3.7775	-0.587987	0.556541	NA
4930406D18Rik	0	NA	NA	NA	NA	NA
4930407G08Rik	0	NA	NA	NA	NA	NA
4930407I10Rik	0	NA	NA	NA	NA	NA
4930407I19Rik	0	NA	NA	NA	NA	NA
4930412B13Rik	0	NA	NA	NA	NA	NA
4930412C18Rik	5.31904	-0.631026	1.31723	-0.479055	0.631899	NA
4930412O13Rik	19.4236	-0.652271	1.86316	-0.350088	0.726272	NA
4930413E15Rik	0	NA	NA	NA	NA	NA
4930413F20Rik	0.311693	0	4.99742	0	1	NA
4930413G21Rik	1.52067	-0.596516	2.20125	-0.27099	0.786399	NA
4930413M19Rik	0	NA	NA	NA	NA	NA
4930414N06Rik	0	NA	NA	NA	NA	NA
4930415F15Rik	0	NA	NA	NA	NA	NA
4930415L06Rik	0	NA	NA	NA	NA	NA
4930415O20Rik	2.45086	2.16306	1.81223	1.19359	0.232638	NA
4930417O13Rik	0	NA	NA	NA	NA	NA
4930417O22Rik	0.414645	-2.74708	4.85487	-0.56584	0.571503	NA
4930419G24Rik	0	NA	NA	NA	NA	NA
4930423M02Rik	0	NA	NA	NA	NA	NA
4930425K10Rik	0	NA	NA	NA	NA	NA
4930425L21Rik	0.123783	-1.08901	4.99157	-0.21817	0.827296	NA
4930425O10Rik	1.00575	-0.0808341	2.96293	-0.0272818	0.978235	NA
4930426D05Rik	17.3613	1.75237	2.17289	0.806468	0.419973	NA
4930426L09Rik	2.01825	1.91067	2.2546	0.847457	0.396741	NA
4930427A07Rik	772.411	-0.118028	0.147115	-0.802288	0.422386	0.997916
4930428D20Rik	0	NA	NA	NA	NA	NA
4930428E07Rik	0	NA	NA	NA	NA	NA
4930428G15Rik	0.29077	0	4.99742	0	1	NA
4930428O21Rik	0.152365	1.72424	4.99054	0.345502	0.729717	NA
4930429B21Rik	76.3597	0.990326	0.326825	3.03015	0.00244436	0.0859143
4930429D17Rik	0	NA	NA	NA	NA	NA
4930429F11Rik	0	NA	NA	NA	NA	NA
4930429F24Rik	2.91811	1.26865	2.28648	0.554845	0.579	NA
4930430A15Rik	0	NA	NA	NA	NA	NA
4930430F08Rik	404.959	-0.135026	0.163138	-0.827679	0.407852	0.997916
4930430F21Rik	0	NA	NA	NA	NA	NA
4930430J02Rik	0.715832	0.23712	3.24345	0.0731072	0.941721	NA
4930431F12Rik	0.328087	0	4.99742	0	1	NA
4930431P03Rik	0.184241	1.86273	4.98145	0.373934	0.708454	NA
4930432J09Rik	0.798756	0	3.62549	0	1	NA
4930432K21Rik	54.3918	0.0682966	0.38864	0.175732	0.860504	0.997916
4930432M17Rik	0	NA	NA	NA	NA	NA
4930433B08Rik	0	NA	NA	NA	NA	NA
4930433I11Rik	0	NA	NA	NA	NA	NA
4930433N12Rik	6.21693	-0.90773	1.25864	-0.721199	0.470787	NA
4930434J06Rik	0	NA	NA	NA	NA	NA
4930435E12Rik	0	NA	NA	NA	NA	NA
4930438E09Rik	0	NA	NA	NA	NA	NA
4930440C22Rik	0	NA	NA	NA	NA	NA
4930440I19Rik	0	NA	NA	NA	NA	NA
4930441H08Rik	0	NA	NA	NA	NA	NA
4930441J16Rik	0	NA	NA	NA	NA	NA
4930442J19Rik	0	NA	NA	NA	NA	NA
4930442L01Rik	0	NA	NA	NA	NA	NA
4930443O20Rik	0.152365	1.72424	4.99054	0.345502	0.729717	NA
4930444F02Rik	0.814553	0.321349	2.83792	0.113234	0.909845	NA
4930444G20Rik	0	NA	NA	NA	NA	NA
4930444M15Rik	75.1897	0.669117	0.428817	1.56038	0.118671	0.794216
4930444P10Rik	6.34003	-1.10971	2.28694	-0.485237	0.627508	NA
4930445N18Rik	0.485451	0.31503	4.26288	0.0739008	0.941089	NA
4930447A16Rik	0	NA	NA	NA	NA	NA
4930447C04Rik	582.547	0.250903	0.295172	0.850022	0.395313	0.994455
4930447F24Rik	2.34793	1.31053	1.76917	0.740757	0.458841	NA
4930447J18Rik	0	NA	NA	NA	NA	NA
4930447K03Rik	0.543404	-0.598068	3.97558	-0.150435	0.880421	NA
4930447M23Rik	0	NA	NA	NA	NA	NA
4930447N08Rik	0	NA	NA	NA	NA	NA
4930448C13Rik	0	NA	NA	NA	NA	NA
4930448F12Rik	0	NA	NA	NA	NA	NA
4930448H16Rik	0	NA	NA	NA	NA	NA
4930448I06Rik	0	NA	NA	NA	NA	NA
4930448I18Rik	0	NA	NA	NA	NA	NA
4930448K20Rik	1.10776	0.871112	2.60554	0.334331	0.738129	NA
4930449E01Rik	0.152365	1.72424	4.99054	0.345502	0.729717	NA
4930449E18Rik	0	NA	NA	NA	NA	NA
4930449I24Rik	0	NA	NA	NA	NA	NA
4930451G09Rik	26.2393	0.583873	0.628294	0.929299	0.352734	NA
4930451I11Rik	0.145431	-1.20651	4.98374	-0.24209	0.808711	NA
4930452A19Rik	0.110872	0	4.99742	0	1	NA
4930452B06Rik	403.7	0.244477	0.181503	1.34696	0.177993	0.891806
4930452G13Rik	0.0899492	0	4.99742	0	1	NA
4930452N14Rik	0	NA	NA	NA	NA	NA
4930453H23Rik	3.65681	0.611284	1.44261	0.423735	0.671759	NA
4930453L07Rik	0.247567	-2.01715	4.90053	-0.411619	0.680619	NA
4930453N24Rik	1010.21	0.0631612	0.148002	0.426759	0.669555	0.997916
4930455B14Rik	0.825575	4.06463	4.23203	0.960443	0.336832	NA
4930455C13Rik	0.145431	-1.20651	4.98374	-0.24209	0.808711	NA
4930455D15Rik	0.554261	-1.08963	4.65651	-0.234001	0.814984	NA
4930455F16Rik	0	NA	NA	NA	NA	NA
4930455G09Rik	29.334	-0.607092	0.752319	-0.80696	0.419689	NA
4930455H04Rik	0	NA	NA	NA	NA	NA
4930455J16Rik	0	NA	NA	NA	NA	NA
4930456L15Rik	0	NA	NA	NA	NA	NA
4930459C07Rik	0.209303	0	4.99742	0	1	NA
4930459L07Rik	0	NA	NA	NA	NA	NA
4930461G14Rik	70.4158	0.177164	0.348668	0.508117	0.611371	0.997916
4930463O16Rik	0	NA	NA	NA	NA	NA
4930465K10Rik	2.33484	-1.65393	2.15729	-0.766672	0.443276	NA
4930465M20Rik	0	NA	NA	NA	NA	NA
4930467D21Rik	4.91014	0.236795	1.29509	0.182841	0.854923	NA
4930467E23Rik	0.097862	0	4.99742	0	1	NA
4930467K11Rik	3.34459	0.558313	1.50484	0.371011	0.710629	NA
4930469G21Rik	0.669146	-1.66556	4.08018	-0.408207	0.683122	NA
4930470H14Rik	0	NA	NA	NA	NA	NA
4930470O06Rik	0	NA	NA	NA	NA	NA
4930470P17Rik	0	NA	NA	NA	NA	NA
4930471C04Rik	0.195724	0	4.99742	0	1	NA
4930471G03Rik	0	NA	NA	NA	NA	NA
4930471M09Rik	0.945135	1.16373	3.1492	0.369532	0.711731	NA
4930473A02Rik	1.60875	0.321358	2.0098	0.159895	0.872963	NA
4930473O22Rik	0	NA	NA	NA	NA	NA
4930474G06Rik	0	NA	NA	NA	NA	NA
4930474H20Rik	0	NA	NA	NA	NA	NA
4930474M22Rik	0	NA	NA	NA	NA	NA
4930474N05Rik	0	NA	NA	NA	NA	NA
4930474N09Rik	0.213733	-1.08899	4.99157	-0.218167	0.827299	NA
4930477N07Rik	1.26535	-1.12742	2.80966	-0.401265	0.688225	NA
4930478L05Rik	0.123783	-1.08901	4.99157	-0.21817	0.827296	NA
4930478P22Rik	0.152365	1.72424	4.99054	0.345502	0.729717	NA
4930479D17Rik	2.80226	0.849668	1.59651	0.532202	0.594586	NA
4930480E11Rik	0	NA	NA	NA	NA	NA
4930480G23Rik	0.399931	-0.613404	4.8935	-0.125351	0.900246	NA
4930480K15Rik	0.110872	0	4.99742	0	1	NA
4930480K23Rik	115.766	0.0127234	0.319876	0.0397761	0.968272	0.997916
4930480M12Rik	0	NA	NA	NA	NA	NA
4930481A15Rik	14.9011	0.203303	0.824681	0.246523	0.805277	NA
4930482G09Rik	0	NA	NA	NA	NA	NA
4930483J18Rik	1.86127	1.37189	2.06161	0.665448	0.505764	NA
4930483K19Rik	0	NA	NA	NA	NA	NA
4930483O08Rik	0	NA	NA	NA	NA	NA
4930484H19Rik	0	NA	NA	NA	NA	NA
4930486F22Rik	0	NA	NA	NA	NA	NA
4930486I03Rik	0	NA	NA	NA	NA	NA
4930486L24Rik	21.6976	0.637042	0.611004	1.04261	0.297127	NA
4930487D11Rik	0	NA	NA	NA	NA	NA
4930487H11Rik	0.304729	2.63943	4.90215	0.538422	0.590286	NA
4930488B22Rik	0	NA	NA	NA	NA	NA
4930488L21Rik	0	NA	NA	NA	NA	NA
4930500F04Rik	0.290861	-2.22849	4.88491	-0.456198	0.648248	NA
4930500L23Rik	0.0899492	0	4.99742	0	1	NA
4930502A04Rik	0	NA	NA	NA	NA	NA
4930502E09Rik	1.12532	-1.32638	2.77176	-0.478533	0.632271	NA
4930502E18Rik	5.66851	-0.359058	1.19603	-0.300208	0.764018	NA
4930503B20Rik	1.08934	1.81962	3.12091	0.583042	0.559865	NA
4930503E14Rik	0.601477	-0.71879	3.87474	-0.185507	0.852832	NA
4930503E24Rik	96.9688	-0.407937	0.303177	-1.34554	0.17845	0.892175
4930503F20Rik	0	NA	NA	NA	NA	NA
4930503H13Rik	0	NA	NA	NA	NA	NA
4930503L19Rik	577.439	-0.0577074	0.159154	-0.362589	0.716912	0.997916
4930503O07Rik	0	NA	NA	NA	NA	NA
4930504C09Rik	0	NA	NA	NA	NA	NA
4930504O13Rik	0	NA	NA	NA	NA	NA
4930505A04Rik	1.24869	0.246121	3.02514	0.0813587	0.935157	NA
4930505G20Rik	0	NA	NA	NA	NA	NA
4930505K13Rik	0	NA	NA	NA	NA	NA
4930505K14Rik	0	NA	NA	NA	NA	NA
4930506A18Rik	0.0899492	0	4.99742	0	1	NA
4930506C21Rik	0.221645	-1.08899	4.99157	-0.218167	0.827299	NA
4930507D05Rik	9.19848	0.273442	0.896085	0.305152	0.76025	NA
4930507D10Rik	0	NA	NA	NA	NA	NA
4930509E16Rik	28.7416	-0.0599612	0.538344	-0.111381	0.911314	NA
4930509J09Rik	0	NA	NA	NA	NA	NA
4930509K18Rik	0	NA	NA	NA	NA	NA
4930511A02Rik	0.184241	1.86273	4.98145	0.373934	0.708454	NA
4930511A08Rik	0.213733	-1.08899	4.99157	-0.218167	0.827299	NA
4930511E03Rik	0.110872	0	4.99742	0	1	NA
4930511M06Rik	3.45581	0	2.56687	0	1	NA
4930512B01Rik	0.145431	-1.20651	4.98374	-0.24209	0.808711	NA
4930512J16Rik	2.10368	-0.951884	2.32315	-0.409739	0.681997	NA
4930512M02Rik	0	NA	NA	NA	NA	NA
4930513D17Rik	0.412939	0	4.99742	0	1	NA
4930513N10Rik	96.812	0.436569	0.304809	1.43227	0.152067	0.85815
4930513O06Rik	0	NA	NA	NA	NA	NA
4930515B02Rik	0	NA	NA	NA	NA	NA
4930515G01Rik	7.46122	0.661707	1.11593	0.592966	0.553204	NA
4930515G16Rik	0	NA	NA	NA	NA	NA
4930515L03Rik	0	NA	NA	NA	NA	NA
4930515L19Rik	0	NA	NA	NA	NA	NA
4930517E11Rik	0	NA	NA	NA	NA	NA
4930517M08Rik	0	NA	NA	NA	NA	NA
4930518J21Rik	0	NA	NA	NA	NA	NA
4930518P08Rik	0	NA	NA	NA	NA	NA
4930519D14Rik	0	NA	NA	NA	NA	NA
4930519F09Rik	64.3891	-0.313449	0.35603	-0.8804	0.378642	0.993357
4930519F16Rik	2.31379	2.20381	2.09485	1.05201	0.292795	NA
4930519F24Rik	0	NA	NA	NA	NA	NA
4930519G04Rik	0.110872	0	4.99742	0	1	NA
4930519H02Rik	0	NA	NA	NA	NA	NA
4930519K11Rik	0.221744	0	4.99742	0	1	NA
4930520O04Rik	8.23968	0.672969	0.991783	0.678544	0.497427	NA
4930520P13Rik	0	NA	NA	NA	NA	NA
4930521E06Rik	0	NA	NA	NA	NA	NA
4930522H14Rik	0	NA	NA	NA	NA	NA
4930522O17Rik	0	NA	NA	NA	NA	NA
4930523C07Rik	22.858	0.584752	1.1466	0.509986	0.610061	NA
4930523O13Rik	0	NA	NA	NA	NA	NA
4930524B15Rik	7.79488	1.02067	1.05438	0.968037	0.333026	NA
4930524B17Rik	0	NA	NA	NA	NA	NA
4930524C18Rik	0.195724	0	4.99742	0	1	NA
4930524N10Rik	0	NA	NA	NA	NA	NA
4930524O05Rik	0	NA	NA	NA	NA	NA
4930524O08Rik	0	NA	NA	NA	NA	NA
4930525C09Rik	0	NA	NA	NA	NA	NA
4930525D18Rik	0.354164	-1.20648	4.98374	-0.242082	0.808717	NA
4930525G20Rik	11.2631	-0.798465	0.956578	-0.83471	0.403881	NA
4930526H09Rik	0.0899492	0	4.99742	0	1	NA
4930526I15Rik	78.0243	0.520501	0.384877	1.35238	0.176253	0.889987
4930526L06Rik	8.43696	0.406615	0.990802	0.410389	0.68152	NA
4930527F14Rik	0.900932	0.944766	2.90957	0.32471	0.745401	NA
4930527G23Rik	0	NA	NA	NA	NA	NA
4930528A17Rik	19.233	0.377947	0.645742	0.585291	0.558352	NA
4930528D03Rik	0.551317	-0.598453	3.95637	-0.151263	0.879768	NA
4930528G23Rik	0	NA	NA	NA	NA	NA
4930528H21Rik	0	NA	NA	NA	NA	NA
4930528P14Rik	0	NA	NA	NA	NA	NA
4930529C04Rik	0	NA	NA	NA	NA	NA
4930529K09Rik	0	NA	NA	NA	NA	NA
4930529L06Rik	0	NA	NA	NA	NA	NA
4930532I03Rik	0	NA	NA	NA	NA	NA
4930532M18Rik	0	NA	NA	NA	NA	NA
4930533B01Rik	0	NA	NA	NA	NA	NA
4930533N22Rik	0	NA	NA	NA	NA	NA
4930533P14Rik	0	NA	NA	NA	NA	NA
4930538K18Rik	4.63447	-0.470945	1.5811	-0.297859	0.765811	NA
4930539C22Rik	0	NA	NA	NA	NA	NA
4930539E08Rik	83.3756	0.0575776	0.344529	0.16712	0.867276	0.997916
4930539J05Rik	5.80096	0.320692	1.251	0.256348	0.797682	NA
4930539M17Rik	0.200821	0	4.99742	0	1	NA
4930539N22Rik	0	NA	NA	NA	NA	NA
4930540M03Rik	0.328087	0	4.99742	0	1	NA
4930542C21Rik	0	NA	NA	NA	NA	NA
4930542D17Rik	0.119353	0	4.99742	0	1	NA
4930543E12Rik	0.336605	2.76836	4.89223	0.565869	0.571483	NA
4930543N07Rik	0	NA	NA	NA	NA	NA
4930544D05Rik	0.123783	-1.08901	4.99157	-0.21817	0.827296	NA
4930544G11Rik	0	NA	NA	NA	NA	NA
4930544M13Rik	0	NA	NA	NA	NA	NA
4930545E07Rik	0	NA	NA	NA	NA	NA
4930545H06Rik	0	NA	NA	NA	NA	NA
4930545L23Rik	0	NA	NA	NA	NA	NA
4930546C10Rik	0	NA	NA	NA	NA	NA
4930546K05Rik	2.59279	0.241422	2.02298	0.11934	0.905006	NA
4930547E08Rik	0	NA	NA	NA	NA	NA
4930547E14Rik	0	NA	NA	NA	NA	NA
4930548G14Rik	0.179898	0	4.99742	0	1	NA
4930548H24Rik	1.26361	0.327373	2.83227	0.115587	0.90798	NA
4930548J01Rik	0.238707	0	4.99742	0	1	NA
4930548K13Rik	0	NA	NA	NA	NA	NA
4930549C01Rik	0.152365	1.72424	4.99054	0.345502	0.729717	NA
4930549C15Rik	0	NA	NA	NA	NA	NA
4930549G23Rik	1.42904	-1.20022	2.2204	-0.540543	0.588823	NA
4930550C14Rik	17.1902	0.213949	0.688004	0.310971	0.755823	NA
4930550C17Rik	0.110872	0	4.99742	0	1	NA
4930550L24Rik	8.89483	1.75038	2.22387	0.787085	0.431232	NA
4930552N02Rik	0	NA	NA	NA	NA	NA
4930552P12Rik	4.60534	-0.612694	2.11815	-0.289259	0.772383	NA
4930553C11Rik	0	NA	NA	NA	NA	NA
4930553E22Rik	0	NA	NA	NA	NA	NA
4930554C24Rik	0	NA	NA	NA	NA	NA
4930554G24Rik	0	NA	NA	NA	NA	NA
4930554H23Rik	0	NA	NA	NA	NA	NA
4930554I06Rik	0	NA	NA	NA	NA	NA
4930555B11Rik	0	NA	NA	NA	NA	NA
4930555B12Rik	0	NA	NA	NA	NA	NA
4930555G01Rik	0	NA	NA	NA	NA	NA
4930555G21Rik	0	NA	NA	NA	NA	NA
4930555K05Rik	0	NA	NA	NA	NA	NA
4930556C24Rik	0	NA	NA	NA	NA	NA
4930556G01Rik	0.857025	1.29461	4.26272	0.303705	0.761353	NA
4930556J02Rik	0	NA	NA	NA	NA	NA
4930556M19Rik	73.4718	0.667717	0.538571	1.23979	0.215052	0.937867
4930556N09Rik	0	NA	NA	NA	NA	NA
4930556N13Rik	0	NA	NA	NA	NA	NA
4930557A04Rik	0	NA	NA	NA	NA	NA
4930557F10Rik	0	NA	NA	NA	NA	NA
4930557J02Rik	0	NA	NA	NA	NA	NA
4930557K07Rik	0	NA	NA	NA	NA	NA
4930558C23Rik	1.80278	-0.180502	2.03023	-0.0889071	0.929156	NA
4930558F17Rik	0	NA	NA	NA	NA	NA
4930558G05Rik	0	NA	NA	NA	NA	NA
4930558J18Rik	69.7235	0.143495	0.363077	0.395219	0.692681	0.997916
4930558K02Rik	0.623287	-1.09187	3.90418	-0.279668	0.779732	NA
4930559C10Rik	0	NA	NA	NA	NA	NA
4930562C15Rik	0.123783	-1.08901	4.99157	-0.21817	0.827296	NA
4930562F07Rik	0.200821	0	4.99742	0	1	NA
4930563D23Rik	0.152365	1.72424	4.99054	0.345502	0.729717	NA
4930563E18Rik	0.285673	0	4.99742	0	1	NA
4930563E22Rik	37.7648	0.468535	0.609667	0.768509	0.442185	0.997916
4930563F08Rik	0	NA	NA	NA	NA	NA
4930563H07Rik	0	NA	NA	NA	NA	NA
4930563M20Rik	0	NA	NA	NA	NA	NA
4930563M21Rik	0.119353	0	4.99742	0	1	NA
4930564C03Rik	0	NA	NA	NA	NA	NA
4930564D02Rik	0.184241	1.86273	4.98145	0.373934	0.708454	NA
4930565D16Rik	0	NA	NA	NA	NA	NA
4930565N06Rik	0	NA	NA	NA	NA	NA
4930567H12Rik	0	NA	NA	NA	NA	NA
4930567H17Rik	0	NA	NA	NA	NA	NA
4930567J20Rik	0	NA	NA	NA	NA	NA
4930567K12Rik	0	NA	NA	NA	NA	NA
4930567K20Rik	0	NA	NA	NA	NA	NA
4930568D16Rik	0	NA	NA	NA	NA	NA
4930568E12Rik	0	NA	NA	NA	NA	NA
4930568G15Rik	0	NA	NA	NA	NA	NA
4930570G19Rik	6.25591	-1.1349	2.28585	-0.496489	0.61955	NA
4930571K23Rik	0	NA	NA	NA	NA	NA
4930571O06Rik	0	NA	NA	NA	NA	NA
4930572K03Rik	0	NA	NA	NA	NA	NA
4930572O03Rik	0.119353	0	4.99742	0	1	NA
4930572O13Rik	0	NA	NA	NA	NA	NA
4930573O16Rik	0	NA	NA	NA	NA	NA
4930577N17Rik	18.2505	0.431068	0.807164	0.534053	0.593305	NA
4930578C19Rik	0.0899492	0	4.99742	0	1	NA
4930578E11Rik	0	NA	NA	NA	NA	NA
4930578I06Rik	0	NA	NA	NA	NA	NA
4930578M01Rik	0.776631	-2.12484	3.29133	-0.645588	0.518546	NA
4930578N18Rik	0	NA	NA	NA	NA	NA
4930579F01Rik	0.311693	0	4.99742	0	1	NA
4930579G18Rik	4.94991	0.294875	1.25614	0.234747	0.814405	NA
4930579G24Rik	525.472	-0.121973	0.205785	-0.592723	0.553366	0.997916
4930579H20Rik	0	NA	NA	NA	NA	NA
4930579J19Rik	0	NA	NA	NA	NA	NA
4930579K19Rik	12.9708	0.354901	1.1783	0.301197	0.763264	NA
4930579P08Rik	0.276148	0.314741	4.98467	0.0631418	0.949654	NA
4930581F22Rik	14.9857	0.520897	1.01925	0.51106	0.609309	NA
4930583K01Rik	0.379965	1.86278	4.98145	0.373944	0.708446	NA
4930583P06Rik	0	NA	NA	NA	NA	NA
4930584F24Rik	0.119353	0	4.99742	0	1	NA
4930586N03Rik	0	NA	NA	NA	NA	NA
4930587E11Rik	0	NA	NA	NA	NA	NA
4930590J08Rik	3.55443	1.71136	1.72984	0.98932	0.322506	NA
4930590L20Rik	0.110872	0	4.99742	0	1	NA
4930591A17Rik	3.93187	1.00872	1.52238	0.662592	0.507592	NA
4930591E09Rik	0	NA	NA	NA	NA	NA
4930592A05Rik	0	NA	NA	NA	NA	NA
4930592I03Rik	0	NA	NA	NA	NA	NA
4930593A02Rik	0.410215	-2.22846	4.88491	-0.456193	0.648251	NA
4930593C16Rik	0.110872	0	4.99742	0	1	NA
4930594C11Rik	37.3105	-0.66733	0.538028	-1.24032	0.214855	0.937867
4930594O21Rik	0	NA	NA	NA	NA	NA
4930595D18Rik	0	NA	NA	NA	NA	NA
4930595M18Rik	0.184241	1.86273	4.98145	0.373934	0.708454	NA
4930596D02Rik	0	NA	NA	NA	NA	NA
4930596I21Rik	0.634401	1.79283	4.17872	0.42904	0.667894	NA
4930597A21Rik	0.0899492	0	4.99742	0	1	NA
4930597G03Rik	0	NA	NA	NA	NA	NA
4930598F16Rik	0.45016	1.11241	4.8882	0.22757	0.819981	NA
4930599N23Rik	1.07839	1.7333	3.08451	0.561938	0.574159	NA
4931402G19Rik	0	NA	NA	NA	NA	NA
4931403E22Rik	0.208734	0	4.99742	0	1	NA
4931403G20Rik	0	NA	NA	NA	NA	NA
4931406B18Rik	0	NA	NA	NA	NA	NA
4931406C07Rik	17.1651	0.0509068	0.857058	0.0593971	0.952636	NA
4931406H21Rik	1.04227	1.24942	2.8669	0.435809	0.662976	NA
4931406P16Rik	2499.74	-0.0196772	0.152251	-0.129242	0.897166	0.997916
4931408C20Rik	0	NA	NA	NA	NA	NA
4931408D14Rik	1.40463	-3.1703	2.54457	-1.24591	0.212799	NA
4931409K22Rik	3.87193	1.65281	1.39159	1.18772	0.234946	NA
4931414P19Rik	294.874	-0.0207952	0.190643	-0.109079	0.91314	0.997916
4931417E11Rik	0	NA	NA	NA	NA	NA
4931419H13Rik	0	NA	NA	NA	NA	NA
4931420L22Rik	0	NA	NA	NA	NA	NA
4931423N10Rik	1.55994	-0.640841	2.53789	-0.25251	0.800647	NA
4931428F04Rik	492.602	0.0250434	0.226172	0.110727	0.911833	0.997916
4931428L18Rik	0.119353	0	4.99742	0	1	NA
4931429L15Rik	0.0899492	0	4.99742	0	1	NA
4931429P17Rik	0	NA	NA	NA	NA	NA
4931430N09Rik	0	NA	NA	NA	NA	NA
4931431B13Rik	0	NA	NA	NA	NA	NA
4931431C16Rik	0.187811	0	4.99742	0	1	NA
4931431F19Rik	0	NA	NA	NA	NA	NA
4931440F15Rik	2.17578	1.22853	2.23688	0.549215	0.582858	NA
4931440J10Rik	0.529477	0	4.69082	0	1	NA
4931440P22Rik	11.1733	0.491791	0.898784	0.547174	0.584259	NA
4932411E22Rik	0	NA	NA	NA	NA	NA
4932411N23Rik	0.123783	-1.08901	4.99157	-0.21817	0.827296	NA
4932412D23Rik	0.776475	-2.03157	3.30514	-0.61467	0.538773	NA
4932413F04Rik	0.0899492	0	4.99742	0	1	NA
4932414J04Rik	0	NA	NA	NA	NA	NA
4932414N04Rik	0	NA	NA	NA	NA	NA
4932415M13Rik	0.119353	0	4.99742	0	1	NA
4932416H05Rik	88.4779	-0.457121	0.453304	-1.00842	0.313253	0.984953
4932429P05Rik	0	NA	NA	NA	NA	NA
4932435O22Rik	0	NA	NA	NA	NA	NA
4932438A13Rik	1730.29	-0.0910992	0.123823	-0.735721	0.4619	0.997916
4932438H23Rik	0.622242	0	4.3452	0	1	NA
4932441J04Rik	0.097862	0	4.99742	0	1	NA
4932443I19Rik	0.285673	0	4.99742	0	1	NA
4932702P03Rik	0.184241	1.86273	4.98145	0.373934	0.708454	NA
4933400A11Rik	0.399931	-0.613404	4.8935	-0.125351	0.900246	NA
4933400B14Rik	0	NA	NA	NA	NA	NA
4933400C23Rik	0	NA	NA	NA	NA	NA
4933400F21Rik	0	NA	NA	NA	NA	NA
4933400L20Rik	0	NA	NA	NA	NA	NA
4933401B06Rik	0	NA	NA	NA	NA	NA
4933401D09Rik	0.787993	0	4.17327	0	1	NA
4933401H06Rik	0	NA	NA	NA	NA	NA
4933402C06Rik	0.0899492	0	4.99742	0	1	NA
4933402D24Rik	0.110872	0	4.99742	0	1	NA
4933402E13Rik	87.0422	0.25645	0.432885	0.59242	0.553569	0.997916
4933402J07Rik	0	NA	NA	NA	NA	NA
4933402J10Rik	0	NA	NA	NA	NA	NA
4933402J15Rik	0.184241	1.86273	4.98145	0.373934	0.708454	NA
4933402N03Rik	0	NA	NA	NA	NA	NA
4933402N22Rik	0.558312	0	4.61763	0	1	NA
4933402P03Rik	0	NA	NA	NA	NA	NA
4933403O08Rik	1.21028	-0.167077	2.83447	-0.0589448	0.952996	NA
4933404G15Rik	0	NA	NA	NA	NA	NA
4933404K08Rik	0	NA	NA	NA	NA	NA
4933404K13Rik	0	NA	NA	NA	NA	NA
4933404O12Rik	563.737	-0.0388236	0.146004	-0.265908	0.79031	0.997916
4933405D12Rik	2.03727	1.00763	2.19348	0.459377	0.645964	NA
4933405E24Rik	0	NA	NA	NA	NA	NA
4933405L10Rik	0	NA	NA	NA	NA	NA
4933405O20Rik	0.097862	0	4.99742	0	1	NA
4933406C10Rik	5.76503	0.366021	1.75931	0.208049	0.835191	NA
4933406D12Rik	0	NA	NA	NA	NA	NA
4933406F09Rik	0	NA	NA	NA	NA	NA
4933406G16Rik	0.179898	0	4.99742	0	1	NA
4933406I18Rik	0.333242	-1.20648	4.98374	-0.242082	0.808716	NA
4933406J08Rik	13.3612	0.533064	0.764596	0.697185	0.485687	NA
4933406J10Rik	0	NA	NA	NA	NA	NA
4933406K04Rik	0	NA	NA	NA	NA	NA
4933406M09Rik	2.85509	0.202698	1.7548	0.115511	0.90804	NA
4933407E24Rik	0.152365	1.72424	4.99054	0.345502	0.729717	NA
4933407G14Rik	0.152365	1.72424	4.99054	0.345502	0.729717	NA
4933407I05Rik	0	NA	NA	NA	NA	NA
4933407K13Rik	75.0779	-0.492248	0.401511	-1.22599	0.220203	0.940104
4933407L21Rik	0.528339	0	4.99742	0	1	NA
4933408B17Rik	0	NA	NA	NA	NA	NA
4933408J17Rik	2.56984	-1.20701	1.72625	-0.699208	0.484422	NA
4933408N05Rik	0	NA	NA	NA	NA	NA
4933409G03Rik	0	NA	NA	NA	NA	NA
4933409K07Rik	0	NA	NA	NA	NA	NA
4933411E08Rik	0.838067	1.24286	3.23068	0.384706	0.700455	NA
4933411G06Rik	0	NA	NA	NA	NA	NA
4933411K16Rik	3.82098	0.528689	1.39948	0.377776	0.705597	NA
4933412E12Rik	65.8588	-0.334443	0.385008	-0.868667	0.38503	0.994455
4933412E24Rik	0	NA	NA	NA	NA	NA
4933412O06Rik	0.145431	-1.20651	4.98374	-0.24209	0.808711	NA
4933413G19Rik	0.243293	-1.20649	4.98374	-0.242086	0.808714	NA
4933413J09Rik	0.884813	-0.27483	3.35168	-0.0819978	0.934648	NA
4933413L06Rik	0	NA	NA	NA	NA	NA
4933415F23Rik	0.097862	0	4.99742	0	1	NA
4933416C03Rik	7.75924	0.264097	0.947267	0.278798	0.7804	NA
4933416E03Rik	0	NA	NA	NA	NA	NA
4933416I08Rik	0	NA	NA	NA	NA	NA
4933416M06Rik	0	NA	NA	NA	NA	NA
4933416M07Rik	14.3632	0.68848	0.756224	0.910418	0.362602	NA
4933417A18Rik	0	NA	NA	NA	NA	NA
4933417D19Rik	2.9217	0.320251	1.91893	0.16689	0.867456	NA
4933417E11Rik	0.243293	-1.20649	4.98374	-0.242086	0.808714	NA
4933417G07Rik	3.73591	0.359557	1.54574	0.232611	0.816064	NA
4933417O13Rik	0.200821	0	4.99742	0	1	NA
4933421I07Rik	0	NA	NA	NA	NA	NA
4933421O10Rik	64.6376	0.0590434	0.493231	0.119707	0.904715	0.997916
4933422A05Rik	1.47177	-0.236964	2.29137	-0.103416	0.917633	NA
4933424G05Rik	0.836106	-1.19505	4.17347	-0.286345	0.774614	NA
4933424G06Rik	1.15378	-0.633318	2.72656	-0.232277	0.816322	NA
4933425B07Rik	0.187811	0	4.99742	0	1	NA
4933425L06Rik	0	NA	NA	NA	NA	NA
4933427D06Rik	6.05148	-0.117562	1.15657	-0.101647	0.919037	NA
4933427D14Rik	409.453	-0.173991	0.210573	-0.826276	0.408648	0.997916
4933427E11Rik	3.6417	-1.26546	2.04155	-0.619851	0.535356	NA
4933427E13Rik	0	NA	NA	NA	NA	NA
4933427G17Rik	4.35884	0.351933	2.31312	0.152146	0.879072	NA
4933427I22Rik	0	NA	NA	NA	NA	NA
4933428C19Rik	0.119353	0	4.99742	0	1	NA
4933428G20Rik	1.02389	3.23219	3.31948	0.973703	0.330204	NA
4933429K18Rik	0	NA	NA	NA	NA	NA
4933429O19Rik	0.119353	0	4.99742	0	1	NA
4933430H16Rik	0	NA	NA	NA	NA	NA
4933430I17Rik	0	NA	NA	NA	NA	NA
4933430M04Rik	0.145431	-1.20651	4.98374	-0.24209	0.808711	NA
4933430N04Rik	0	NA	NA	NA	NA	NA
4933431E20Rik	152.31	-0.936346	0.445636	-2.10115	0.035628	0.468985
4933431G14Rik	0	NA	NA	NA	NA	NA
4933432G23Rik	0.329672	0.335735	4.96772	0.0675833	0.946117	NA
4933432I03Rik	0.393544	1.8628	4.98145	0.373947	0.708444	NA
4933432I09Rik	0.465036	-1.20573	4.91996	-0.245069	0.806403	NA
4933432K03Rik	0	NA	NA	NA	NA	NA
4933433F19Rik	0	NA	NA	NA	NA	NA
4933433G08Rik	0	NA	NA	NA	NA	NA
4933433G15Rik	3.19797	-0.9571	1.76922	-0.540973	0.588526	NA
4933433G19Rik	4.4564	0.369318	1.36206	0.271146	0.786278	NA
4933433H22Rik	0	NA	NA	NA	NA	NA
4933434E20Rik	813.032	0.0129282	0.140874	0.091771	0.92688	0.997916
4933436E23Rik	0.097862	0	4.99742	0	1	NA
4933436H12Rik	0	NA	NA	NA	NA	NA
4933436I01Rik	0	NA	NA	NA	NA	NA
4933438B17Rik	0	NA	NA	NA	NA	NA
4933438K21Rik	0.217215	0	4.99742	0	1	NA
4933439C10Rik	120.867	-0.201059	0.376824	-0.533563	0.593644	0.997916
4933439K11Rik	2.70948	2.68801	2.39484	1.12242	0.261686	NA
4933440J02Rik	0.308024	0.453253	4.97557	0.0910956	0.927417	NA
4933440M02Rik	0.473362	-1.08913	4.90023	-0.222261	0.824111	NA
5031410I06Rik	0	NA	NA	NA	NA	NA
5031414D18Rik	12.6679	0.318744	2.12779	0.149801	0.880922	NA
5031425E22Rik	146.946	-0.250519	0.269738	-0.928752	0.353018	0.992451
5031425F14Rik	0	NA	NA	NA	NA	NA
5031426D15Rik	1.06177	0	3.33175	0	1	NA
5031434C07Rik	0.475011	1.86027	4.80003	0.387555	0.698346	NA
5031434O11Rik	8.65704	-0.354878	1.13199	-0.313499	0.753901	NA
5031439G07Rik	1087.79	-0.183194	0.149726	-1.22353	0.221131	0.940104
5033403F01Rik	9.96924	1.44033	1.21897	1.18159	0.237367	NA
5033403H07Rik	2.31133	0	2.78854	0	1	NA
5033404E19Rik	4.53387	-0.437008	1.33012	-0.328548	0.742497	NA
5033406O09Rik	23.5841	-0.0836212	0.569388	-0.146862	0.883241	NA
5033428I22Rik	1.29465	-0.62258	3.02828	-0.205589	0.837112	NA
5330411J11Rik	9.40925	0.623178	0.944616	0.659715	0.509437	NA
5330413P13Rik	0.722669	-1.59815	3.93611	-0.406022	0.684726	NA
5330417C22Rik	0	NA	NA	NA	NA	NA
5330434G04Rik	3.22775	0	2.53938	0	1	NA
5330439B14Rik	0.097862	0	4.99742	0	1	NA
5430401F13Rik	0	NA	NA	NA	NA	NA
5430402E10Rik	0	NA	NA	NA	NA	NA
5430402O13Rik	3.94969	-0.206998	1.51528	-0.136607	0.891341	NA
5430403N17Rik	0.324604	-1.08898	4.99157	-0.218164	0.827301	NA
5430405H02Rik	38.6181	-0.520892	0.594006	-0.876914	0.380533	0.993357
5430416N02Rik	295.939	-0.18795	0.200063	-0.939453	0.347498	0.992451
5430419D17Rik	0.152365	1.72424	4.99054	0.345502	0.729717	NA
5430421F17Rik	0.110872	0	4.99742	0	1	NA
5430421N21Rik	0	NA	NA	NA	NA	NA
5430425K12Rik	0.243293	-1.20649	4.98374	-0.242086	0.808714	NA
5430427M07Rik	0	NA	NA	NA	NA	NA
5430427O19Rik	0.097862	0	4.99742	0	1	NA
5430428K19Rik	0	NA	NA	NA	NA	NA
5430431A17Rik	0.110872	0	4.99742	0	1	NA
5430434I15Rik	0	NA	NA	NA	NA	NA
5430437J10Rik	0.119353	0	4.99742	0	1	NA
5430440P10Rik	1.00749	0	3.37468	0	1	NA
5530400C23Rik	0	NA	NA	NA	NA	NA
5530401A14Rik	0	NA	NA	NA	NA	NA
5530601H04Rik	131.685	0.138121	0.283008	0.488048	0.625516	0.997916
5730403I07Rik	2.20676	-0.226244	1.95746	-0.115581	0.907985	NA
5730405O15Rik	18.0472	0.0758279	0.720005	0.105316	0.916125	NA
5730408K05Rik	129.631	-0.216489	0.253889	-0.852692	0.39383	0.994455
5730409E04Rik	186.384	-0.0394318	0.241085	-0.16356	0.870078	0.997916
5730412P04Rik	0	NA	NA	NA	NA	NA
5730416F02Rik	0.394678	2.63944	4.90215	0.538425	0.590283	NA
5730420D15Rik	1.45921	-0.229314	2.45652	-0.0933492	0.925626	NA
5730422E09Rik	2.53862	-2.67889	2.04713	-1.30861	0.190666	NA
5730435O14Rik	0	NA	NA	NA	NA	NA
5730455P16Rik	698.861	-0.181681	0.17386	-1.04499	0.29603	0.975007
5730460C07Rik	1.88404	-2.04878	2.61428	-0.78369	0.433222	NA
5730480H06Rik	36.9357	-0.411519	0.509506	-0.807681	0.419274	0.997916
5730488B01Rik	0.299252	0	4.99742	0	1	NA
5730507C01Rik	163.862	0.250424	0.253651	0.987276	0.323507	0.986555
5730508B09Rik	145.879	-0.201659	0.335042	-0.601892	0.547246	0.997916
5730522E02Rik	2.17602	1.64607	1.98611	0.828795	0.407221	NA
5730559C18Rik	477.29	0.208381	0.193288	1.07808	0.280997	0.972686
5830411N06Rik	0.247567	-2.01715	4.90053	-0.411619	0.680619	NA
5830416I19Rik	0	NA	NA	NA	NA	NA
5830417I10Rik	941.947	0.0555457	0.129176	0.430002	0.667194	0.997916
5830418P13Rik	16.5698	0.573825	0.854224	0.67175	0.501743	NA
5830428M24Rik	0.097862	0	4.99742	0	1	NA
5830432E09Rik	0.0899492	0	4.99742	0	1	NA
5830444B04Rik	5.43168	-0.376079	1.75432	-0.214373	0.830256	NA
5830454E08Rik	9.03782	0.183768	0.936179	0.196295	0.844379	NA
5830473C10Rik	1.79941	0	2.87869	0	1	NA
5930403L14Rik	28.0663	0.178762	0.544205	0.328483	0.742546	NA
5930412G12Rik	20.2569	-0.358686	0.864329	-0.414988	0.678151	NA
5930430L01Rik	27.6067	-0.41178	0.649056	-0.634428	0.525801	NA
5930438M14Rik	0.605848	0	3.95259	0	1	NA
6030407O03Rik	2.41263	2.76449	2.50294	1.1045	0.269378	NA
6030408B16Rik	10.3599	-1.11166	2.22281	-0.500115	0.616994	NA
6030419C18Rik	269.248	0.0643839	0.215655	0.29855	0.765283	0.997916
6030440G07Rik	0.464057	1.72458	4.84466	0.355976	0.721859	NA
6030443J06Rik	29.3653	-0.149188	0.614275	-0.242868	0.808108	NA
6030458C11Rik	72.2688	-0.32191	0.426689	-0.754436	0.450587	0.997916
6030466F02Rik	0.319507	-1.08898	4.99157	-0.218165	0.827301	NA
6030468B19Rik	0	NA	NA	NA	NA	NA
6030469F06Rik	0.119353	0	4.99742	0	1	NA
6030471H07Rik	0	NA	NA	NA	NA	NA
6030498E09Rik	0.097862	0	4.99742	0	1	NA
6230400D17Rik	10.8816	0.116258	0.894628	0.129951	0.896605	NA
6230416C02Rik	0	NA	NA	NA	NA	NA
6330403A02Rik	9.54845	-1.31708	1.85556	-0.709803	0.477826	NA
6330403K07Rik	174.331	0.0917501	0.372604	0.24624	0.805496	0.997916
6330407A03Rik	0	NA	NA	NA	NA	NA
6330408A02Rik	156.228	0.175763	0.291847	0.602242	0.547013	0.997916
6330409D20Rik	1.64489	-1.09921	2.85056	-0.385611	0.699784	NA
6330410L21Rik	43.2803	0.833381	0.457639	1.82104	0.0686	0.645783
6330415B21Rik	0.0899492	0	4.99742	0	1	NA
6330415G19Rik	11.4911	0.173249	0.886442	0.195443	0.845046	NA
6330416G13Rik	0.500453	2.63945	4.90215	0.538428	0.590282	NA
6330418K02Rik	34.0305	-0.00741085	0.563477	-0.013152	0.989507	NA
6330549D23Rik	116.465	0.0973302	0.294749	0.330214	0.741238	0.997916
6430411K18Rik	0.110872	0	4.99742	0	1	NA
6430503K07Rik	0.336569	0	4.99742	0	1	NA
6430531B16Rik	0	NA	NA	NA	NA	NA
6430548M08Rik	65.9569	-0.428966	0.47395	-0.905087	0.365419	0.993357
6430550D23Rik	18.2094	0.802191	0.973505	0.824023	0.409926	NA
6430562O15Rik	0.630312	-0.716409	3.46013	-0.207047	0.835973	NA
6430571L13Rik	21.6646	-1.21003	0.745169	-1.62383	0.104412	NA
6430573F11Rik	52.5436	0.394822	0.500483	0.788884	0.43018	0.997916
6430584L05Rik	0.0899492	0	4.99742	0	1	NA
6430706D22Rik	0	NA	NA	NA	NA	NA
6430710C18Rik	0.777264	0	4.06729	0	1	NA
6530402F18Rik	49.7261	1.35643	1.02406	1.32456	0.185319	0.905248
6530403H02Rik	0.824528	1.97866	3.45615	0.572503	0.566981	NA
6530411M01Rik	3.09377	-1.14597	2.50917	-0.456714	0.647877	NA
6720468P15Rik	0.959124	-0.794884	2.9143	-0.272753	0.785043	NA
6720483E21Rik	4.65272	-0.185908	1.52412	-0.121977	0.902917	NA
6720489N17Rik	196.914	-0.162462	0.225922	-0.719106	0.472076	0.997916
6820408C15Rik	15.8093	-0.481012	0.698946	-0.688196	0.491329	NA
6820431F20Rik	62.3321	-5.75362e-05	0.431717	-0.000133273	0.999894	1
7420426K07Rik	0.622242	0	4.3452	0	1	NA
7420461P10Rik	0.23538	-1.20649	4.98374	-0.242086	0.808714	NA
7420700N18Rik	0	NA	NA	NA	NA	NA
7420701I03Rik	0	NA	NA	NA	NA	NA
7530416G11Rik	0	NA	NA	NA	NA	NA
7630403G23Rik	0	NA	NA	NA	NA	NA
8030411F24Rik	6.11499	-1.1405	2.39534	-0.476132	0.63398	NA
8030423F21Rik	0.414466	1.8628	4.98145	0.373948	0.708443	NA
8030423J24Rik	0	NA	NA	NA	NA	NA
8030442B05Rik	0	NA	NA	NA	NA	NA
8030443G20Rik	0	NA	NA	NA	NA	NA
8030451O07Rik	0.418036	0	4.46422	0	1	NA
8030455M16Rik	0	NA	NA	NA	NA	NA
8030462N17Rik	1143.31	-0.0464219	0.128934	-0.360044	0.718814	0.997916
8430408G22Rik	67.5612	1.76392	2.07168	0.851446	0.394522	0.994455
8430422H06Rik	0	NA	NA	NA	NA	NA
8430423G03Rik	0.408667	0.197237	4.97683	0.0396311	0.968387	NA
8430426J06Rik	0	NA	NA	NA	NA	NA
8430429K09Rik	95.4525	0.432051	0.350696	1.23198	0.217955	0.938931
8430430B14Rik	8.2794	0.786572	0.969258	0.81152	0.417067	NA
8430431K14Rik	0.119353	0	4.99742	0	1	NA
8430436N08Rik	0.208734	0	4.99742	0	1	NA
8430437L04Rik	0	NA	NA	NA	NA	NA
9030025P20Rik	18.6962	-0.309216	0.761771	-0.405917	0.684803	NA
9030204H09Rik	0	NA	NA	NA	NA	NA
9030404E10Rik	3.30973	-2.12172	2.20086	-0.964045	0.335024	NA
9030612E09Rik	2.01935	-1.10107	2.70939	-0.406391	0.684455	NA
9030617O03Rik	150.738	0.142832	0.283233	0.504291	0.614057	0.997916
9030619P08Rik	0.0899492	0	4.99742	0	1	NA
9030624G23Rik	24.1399	0.284264	0.578276	0.491571	0.623022	NA
9030624J02Rik	1695.29	-0.0940432	0.152639	-0.616115	0.537819	0.997916
9030625G05Rik	1.77833	-2.68087	2.55568	-1.04898	0.294185	NA
9130008F23Rik	55.996	-0.785207	0.606969	-1.29365	0.195785	0.920681
9130011E15Rik	892.613	0.25941	0.141216	1.83698	0.0662133	0.637159
9130015A21Rik	0.999519	0.857796	2.86064	0.299861	0.764283	NA
9130015L21Rik	0	NA	NA	NA	NA	NA
9130019O22Rik	101.726	0.370058	0.363069	1.01925	0.308085	0.980367
9130019P16Rik	0.110872	0	4.99742	0	1	NA
9130023H24Rik	157.337	0.0598607	0.296514	0.201882	0.840009	0.997916
9130024F11Rik	14.5528	0.339582	1.34857	0.251809	0.801188	NA
9130204L05Rik	0.119353	0	4.99742	0	1	NA
9130209A04Rik	0.119353	0	4.99742	0	1	NA
9130221F21Rik	0	NA	NA	NA	NA	NA
9130221H12Rik	156.729	0.0473105	0.281512	0.168058	0.866537	0.997916
9130227L01Rik	0.844903	-0.607756	3.54275	-0.171549	0.863792	NA
9130230L23Rik	8.34457	2.34197	1.84014	1.27271	0.203121	NA
9130401M01Rik	1159.74	-0.130265	0.153622	-0.847962	0.396459	0.994455
9130409I23Rik	0.478046	-1.20647	4.98374	-0.242082	0.808717	NA
9130409J20Rik	0.452026	-1.2061	4.95156	-0.24358	0.807556	NA
9230009I02Rik	0	NA	NA	NA	NA	NA
9230102K24Rik	0	NA	NA	NA	NA	NA
9230102O04Rik	1.70781	0	2.94466	0	1	NA
9230104L09Rik	1.87806	0	2.86849	0	1	NA
9230105E05Rik	0.979387	1.72957	3.54615	0.48773	0.625741	NA
9230110C19Rik	0	NA	NA	NA	NA	NA
9230110F15Rik	0	NA	NA	NA	NA	NA
9230112D13Rik	0	NA	NA	NA	NA	NA
9230112J17Rik	0.295113	1.86277	4.98145	0.373941	0.708448	NA
9230114K14Rik	111.984	-0.127092	0.322742	-0.393787	0.693738	0.997916
9230116L04Rik	6.31489	-0.0208596	1.33176	-0.0156632	0.987503	NA
9230116N13Rik	26.9971	-0.0957452	0.605345	-0.158166	0.874326	NA
9230117E06Rik	0.290861	-2.22849	4.88491	-0.456198	0.648248	NA
9330020H09Rik	41.7559	0.0352996	0.441295	0.0799909	0.936244	0.997916
9330102E08Rik	78.605	-0.449752	0.373324	-1.20472	0.228311	0.945307
9330111N05Rik	0	NA	NA	NA	NA	NA
9330117O12Rik	0.29077	0	4.99742	0	1	NA
9330133O14Rik	140.576	-0.0539799	0.298655	-0.180743	0.856569	0.997916
9330136K24Rik	4.99229	1.06041	1.49189	0.710784	0.477218	NA
9330151L19Rik	103.241	-0.361489	0.44797	-0.806951	0.419695	0.997916
9330158H04Rik	0	NA	NA	NA	NA	NA
9330159F19Rik	159.776	1.44456	0.402001	3.59342	0.00032636	0.0203041
9330159M07Rik	11.9467	-0.126331	0.935468	-0.135046	0.892576	NA
9330162012Rik	7.84085	-0.746071	1.54977	-0.481406	0.630228	NA
9330162B11Rik	0	NA	NA	NA	NA	NA
9330175E14Rik	0.401544	-1.08897	4.99157	-0.218161	0.827304	NA
9330175M20Rik	0	NA	NA	NA	NA	NA
9330178D15Rik	0	NA	NA	NA	NA	NA
9330179D12Rik	1.08086	1.81901	3.1051	0.585815	0.558	NA
9330182L06Rik	65.8177	-0.700809	0.44692	-1.56809	0.116861	0.787904
9330182O14Rik	0.464938	-2.12591	4.77713	-0.445019	0.656306	NA
9330188P03Rik	0	NA	NA	NA	NA	NA
9330199G10Rik	0	NA	NA	NA	NA	NA
9430007A20Rik	0	NA	NA	NA	NA	NA
9430014N10Rik	0	NA	NA	NA	NA	NA
9430015G10Rik	1251.75	0.0822977	0.170144	0.483695	0.628602	0.997916
9430016H08Rik	625.486	0.00526354	0.155448	0.0338604	0.972988	0.99852
9430018G01Rik	2.00513	-1.38047	2.6221	-0.526475	0.598558	NA
9430019J16Rik	0	NA	NA	NA	NA	NA
9430020K01Rik	544.241	-0.347112	0.20045	-1.73166	0.0833333	0.693974
9430021M05Rik	0.285673	0	4.99742	0	1	NA
9430037G07Rik	8.3173	0.153861	1.09574	0.140418	0.88833	NA
9430038I01Rik	234.139	0.195989	0.219057	0.894696	0.37095	0.993357
9430041J12Rik	1.21699	1.3472	2.50054	0.538762	0.590051	NA
9430060I03Rik	3.78819	0.370134	1.92017	0.192761	0.847146	NA
9430065F17Rik	11.6549	-0.170997	0.938346	-0.182233	0.8554	NA
9430069I07Rik	4.71962	-0.607431	1.29749	-0.468159	0.639671	NA
9430078K24Rik	1.74117	0	2.90178	0	1	NA
9430083A17Rik	41.74	0.53655	0.720705	0.74448	0.456586	0.997916
9430091E24Rik	15.672	-0.24088	0.825575	-0.291772	0.770461	NA
9530002B09Rik	0.879056	0	4.00541	0	1	NA
9530003J23Rik	0	NA	NA	NA	NA	NA
9530014B07Rik	0	NA	NA	NA	NA	NA
9530020I12Rik	0.408667	0.197237	4.97683	0.0396311	0.968387	NA
9530026F06Rik	0	NA	NA	NA	NA	NA
9530026P05Rik	4.78529	0.292622	1.36511	0.214358	0.830268	NA
9530027J09Rik	1.83043	-0.240383	2.05087	-0.11721	0.906693	NA
9530036O11Rik	0.943364	-2.03484	3.1259	-0.650962	0.515071	NA
9530051G07Rik	7.12925	-1.10527	1.23425	-0.895499	0.37052	NA
9530052E02Rik	0.623385	0	4.93676	0	1	NA
9530053A07Rik	19.4252	-0.822526	0.757633	-1.08565	0.277633	NA
9530059O14Rik	0.455922	0	4.99742	0	1	NA
9530062K07Rik	12.3938	0.845467	1.13127	0.74736	0.454847	NA
9530068E07Rik	3460.97	0.0400329	0.124749	0.320906	0.748281	0.997916
9530077C05Rik	30.1678	-0.140867	0.562525	-0.250419	0.802263	NA
9530080O11Rik	2.48132	-0.248584	1.67771	-0.148169	0.882209	NA
9530082P21Rik	30.4197	-0.211032	0.598822	-0.352413	0.724529	NA
9530091C08Rik	1.28551	1.25265	2.73186	0.458533	0.646569	NA
9630001P10Rik	0.110872	0	4.99742	0	1	NA
9630013A20Rik	0	NA	NA	NA	NA	NA
9630013K17Rik	1.67673	-1.2635	2.35522	-0.53647	0.591634	NA
9630028B13Rik	0.097862	0	4.99742	0	1	NA
9630028H03Rik	0.184241	1.86273	4.98145	0.373934	0.708454	NA
9630028I04Rik	2.3914	0.292186	1.91448	0.152619	0.878699	NA
9830107B12Rik	0	NA	NA	NA	NA	NA
9830132P13Rik	0.179898	0	4.99742	0	1	NA
9830147E19Rik	520.492	0.0663839	0.167919	0.395334	0.692597	0.997916
9830166K06Rik	0.507417	0	4.73757	0	1	NA
9930012K11Rik	99.1371	0.337979	0.283024	1.19417	0.232412	0.949395
9930014A18Rik	75.3775	-0.316207	0.360914	-0.876128	0.38096	0.993357
9930021J03Rik	1366.24	0.1061	0.146969	0.721922	0.470342	0.997916
9930104L06Rik	0	NA	NA	NA	NA	NA
9930111H07Rik	0	NA	NA	NA	NA	NA
9930111J21Rik1	1.08174	-1.57563	2.88582	-0.545989	0.585074	NA
9930111J21Rik2	0.097862	0	4.99742	0	1	NA
A130010J15Rik	389.902	0.020203	0.179408	0.112609	0.910341	0.997916
A130077B15Rik	0	NA	NA	NA	NA	NA
A1bg	0	NA	NA	NA	NA	NA
A1cf	0.803284	0	4.4601	0	1	NA
A230001M10Rik	0.796016	1.95791	3.95588	0.494937	0.620645	NA
A230009B12Rik	0.184241	1.86273	4.98145	0.373934	0.708454	NA
A230020J21Rik	1.89234	0.621707	2.09149	0.297255	0.766272	NA
A230028O05Rik	0.891554	-1.17437	3.26755	-0.359404	0.719293	NA
A230046K03Rik	2693.76	-0.0405562	0.105854	-0.383134	0.701621	0.997916
A230050P20Rik	320.586	0.175626	0.218876	0.8024	0.422322	0.997916
A230056J06Rik	1.98149	-0.238012	2.2082	-0.107785	0.914166	NA
A230056P14Rik	13.5461	0.368517	0.780332	0.472257	0.636743	NA
A230057D06Rik	2.40133	0	2.75072	0	1	NA
A230065H16Rik	0	NA	NA	NA	NA	NA
A230070E04Rik	1.6295	2.68798	2.33406	1.15163	0.249473	NA
A230072C01Rik	80.0238	-0.266438	0.429612	-0.620183	0.535138	0.997916
A230072E10Rik	0.625849	1.72556	4.47106	0.385939	0.699542	NA
A230077H06Rik	6.64399	2.76071	2.0146	1.37035	0.170578	NA
A230103J11Rik	2.62935	-0.722279	2.0499	-0.352349	0.724576	NA
A230108P19Rik	0.0899492	0	4.99742	0	1	NA
A2m	350.823	0.0872249	0.210643	0.414088	0.67881	0.997916
A330008L17Rik	0.200821	0	4.99742	0	1	NA
A330009N23Rik	16.7943	0.0462082	0.772614	0.0598076	0.952309	NA
A330015K06Rik	0.937321	-0.62608	2.9384	-0.213068	0.831274	NA
A330023F24Rik	2.56722	1.26241	1.93899	0.651065	0.515005	NA
A330032B11Rik	0.282103	1.86276	4.98145	0.37394	0.708449	NA
A330033J07Rik	0.187811	0	4.99742	0	1	NA
A330035P11Rik	41.968	0.438309	0.539587	0.812305	0.416617	0.997916
A330040F15Rik	0.328087	0	4.99742	0	1	NA
A330041J22Rik	3.4997	0.372097	1.94811	0.191004	0.848522	NA
A330048O09Rik	0.873328	1.35103	3.14217	0.429968	0.667219	NA
A330049N07Rik	0	NA	NA	NA	NA	NA
A330069E16Rik	14.67	-0.311034	0.755935	-0.411456	0.680739	NA
A330070K13Rik	0	NA	NA	NA	NA	NA
A330074K22Rik	8.82326	0.577075	1.31315	0.43946	0.660329	NA
A330076C08Rik	0	NA	NA	NA	NA	NA
A330076H08Rik	3.43111	2.83848	2.36049	1.2025	0.229171	NA
A330093E20Rik	0.119353	0	4.99742	0	1	NA
A330102I10Rik	0.418896	0.453287	4.97557	0.0911025	0.927411	NA
A3galt2	3.20424	1.74315	2.46471	0.707244	0.479415	NA
A430005L14Rik	985.345	-0.0154159	0.178561	-0.086334	0.931201	0.997916
A430033K04Rik	229.985	0.170213	0.22945	0.74183	0.458191	0.997916
A430035B10Rik	5.46758	1.35595	2.04874	0.661849	0.508068	NA
A430046D13Rik	51.3637	-0.106584	0.460862	-0.23127	0.817105	0.997916
A430078G23Rik	0.482036	1.2436	4.67568	0.265971	0.790261	NA
A430078I02Rik	1.26645	-1.09776	2.98178	-0.368158	0.712756	NA
A430085M09Rik	0	NA	NA	NA	NA	NA
A430088P11Rik	0	NA	NA	NA	NA	NA
A430089I19Rik	0.145431	-1.20651	4.98374	-0.24209	0.808711	NA
A430090L17Rik	0.208734	0	4.99742	0	1	NA
A430093F15Rik	0.097862	0	4.99742	0	1	NA
A430105I19Rik	41.0299	-0.0433998	0.552575	-0.0785409	0.937398	0.997916
A4galt	378.723	-0.020746	0.269502	-0.0769788	0.93864	0.997916
A4gnt	0	NA	NA	NA	NA	NA
A530006G24Rik	0	NA	NA	NA	NA	NA
A530013C23Rik	0.69077	1.2651	3.37423	0.37493	0.707713	NA
A530016L24Rik	0	NA	NA	NA	NA	NA
A530032D15Rik	0.110872	0	4.99742	0	1	NA
A530046M15Rik	0.746908	-1.33655	3.56619	-0.374784	0.707821	NA
A530050N04Rik	0	NA	NA	NA	NA	NA
A530053G22Rik	0	NA	NA	NA	NA	NA
A530058N18Rik	0.315077	0	4.99742	0	1	NA
A530064D06Rik	0.179898	0	4.99742	0	1	NA
A530065N20Rik	0.097862	0	4.99742	0	1	NA
A530072M11Rik	5.80253	-1.19739	1.41163	-0.848235	0.396307	NA
A530088E08Rik	0.414645	-2.74708	4.85487	-0.56584	0.571503	NA
A530099J19Rik	0	NA	NA	NA	NA	NA
A630001G21Rik	5.97548	1.6993	1.23407	1.37699	0.168516	NA
A630010A05Rik	0.217215	0	4.99742	0	1	NA
A630012P03Rik	0	NA	NA	NA	NA	NA
A630019I02Rik	0	NA	NA	NA	NA	NA
A630020A06	11.3103	0.441902	0.824958	0.535666	0.592189	NA
A630023A22Rik	0	NA	NA	NA	NA	NA
A630023P12Rik	0.577239	-1.14037	4.32481	-0.26368	0.792026	NA
A630033H20Rik	2.65985	-1.56593	1.87728	-0.834149	0.404197	NA
A630066F11Rik	34.3193	-0.168241	0.547953	-0.307034	0.758817	NA
A630072M18Rik	161.942	0.237655	0.248216	0.957452	0.338339	0.991996
A630073D07Rik	0	NA	NA	NA	NA	NA
A630075F10Rik	1.16083	-1.16773	3.05684	-0.382006	0.702457	NA
A630076J17Rik	0	NA	NA	NA	NA	NA
A630077J23Rik	1.38201	-0.600844	2.98489	-0.201295	0.840468	NA
A630089N07Rik	195.887	0.326826	0.248212	1.31672	0.187931	0.90986
A630095E13Rik	0	NA	NA	NA	NA	NA
A630095N17Rik	0.460389	1.35855	4.74648	0.286222	0.774708	NA
A730004F24Rik	0	NA	NA	NA	NA	NA
A730006G06Rik	0	NA	NA	NA	NA	NA
A730008H23Rik	0	NA	NA	NA	NA	NA
A730017C20Rik	16.1657	0	2.18696	0	1	NA
A730017L22Rik	32.3254	0.425228	0.597917	0.711182	0.476971	NA
A730018C14Rik	0	NA	NA	NA	NA	NA
A730020E08Rik	9.10293	-2.15365	1.98335	-1.08586	0.27754	NA
A730020M07Rik	1.21012	-0.710537	2.8354	-0.250595	0.802127	NA
A730036I17Rik	6.44545	-0.0590879	1.17681	-0.0502103	0.959955	NA
A730043L09Rik	0	NA	NA	NA	NA	NA
A730056A06Rik	3.59321	-3.73622	2.01747	-1.85193	0.0640355	NA
A730082K24Rik	0.607432	0.333269	4.00067	0.0833032	0.93361	NA
A730085K08Rik	0	NA	NA	NA	NA	NA
A730090N16Rik	4.82868	-1.1666	1.26056	-0.92546	0.354727	NA
A830009L08Rik	0.29077	0	4.99742	0	1	NA
A830010M20Rik	243.24	0.115496	0.216371	0.533785	0.59349	0.997916
A830011K09Rik	0.187811	0	4.99742	0	1	NA
A830018L16Rik	32.1259	0.433047	0.522563	0.828698	0.407275	NA
A830019L24Rik	0	NA	NA	NA	NA	NA
A830052D11Rik	6.91329	-0.707711	1.54508	-0.458042	0.646922	NA
A830080D01Rik	0	NA	NA	NA	NA	NA
A830082K12Rik	61.3269	-2.01913	1.61702	-1.24867	0.211785	0.935539
A830082N09Rik	59.5577	1.02368	0.591752	1.72991	0.0836469	0.6944
A930001A20Rik	0.45896	1.72442	4.91997	0.350494	0.725968	NA
A930001C03Rik	47.535	-0.606518	0.718685	-0.843927	0.39871	0.994455
A930002C04Rik	0	NA	NA	NA	NA	NA
A930003A15Rik	0.217215	0	4.99742	0	1	NA
A930003O13Rik	0	NA	NA	NA	NA	NA
A930004D18Rik	119.72	0.669346	0.267193	2.50511	0.0122414	0.254316
A930005H10Rik	98.7506	-0.0587243	0.321747	-0.182517	0.855177	0.997916
A930006I01Rik	0.097862	0	4.99742	0	1	NA
A930006K02Rik	11.881	-0.659175	1.13102	-0.582815	0.560018	NA
A930007I19Rik	9.70003	0.502573	1.16465	0.431522	0.666089	NA
A930009A15Rik	0	NA	NA	NA	NA	NA
A930011G23Rik	0.481021	1.72457	4.85522	0.355199	0.722441	NA
A930012L18Rik	4.1859	-1.10612	2.42862	-0.455452	0.648784	NA
A930013F10Rik	97.6885	0.197763	0.374336	0.528304	0.597289	0.997916
A930015D03Rik	34.2849	-0.725827	0.509178	-1.42549	0.154016	NA
A930016O22Rik	2.46321	0.567423	1.61079	0.352265	0.72464	NA
A930017M01Rik	1.70544	-0.680295	2.17934	-0.312157	0.754922	NA
A930018P22Rik	1.07839	1.7333	3.08451	0.561938	0.574159	NA
A930019D19Rik	0	NA	NA	NA	NA	NA
A930024E05Rik	101.382	-0.16334	0.304084	-0.537154	0.591161	0.997916
A930031H19Rik	0	NA	NA	NA	NA	NA
A930041C12Rik	0	NA	NA	NA	NA	NA
AA387883	0.832119	0	3.96001	0	1	NA
AA388235	68.558	0.291157	0.376702	0.77291	0.439576	0.997916
AA413626	1.98454	1.42727	2.51738	0.566968	0.570736	NA
AA414768	244.93	0.038651	0.340772	0.113422	0.909696	0.997916
AA415398	41.9394	-0.114205	0.536876	-0.212721	0.831544	0.997916
AA465934	120.637	-0.15496	0.323478	-0.479044	0.631907	0.997916
AA467197	13.4543	-0.668241	0.790016	-0.845857	0.397632	NA
AA536875	0.610376	0	4.38121	0	1	NA
AA543186	14.0112	1.18156	0.846124	1.39644	0.162581	NA
AA543401	6.00002	0.219244	1.2219	0.179429	0.857601	NA
AA545190	0	NA	NA	NA	NA	NA
AA619741	0	NA	NA	NA	NA	NA
AA792892	0	NA	NA	NA	NA	NA
AA986860	291.276	-1.89748	0.489253	-3.87832	0.000105181	0.00810379
AB124611	0.640406	-1.19051	3.92929	-0.302985	0.761901	NA
AF067061	5.41506	-0.165236	1.19155	-0.138673	0.889709	NA
AF067063	0.290861	-2.22849	4.88491	-0.456198	0.648248	NA
AF357355	0	NA	NA	NA	NA	NA
AF357359	1.98846	2.55391	2.26835	1.12589	0.260212	NA
AF357399	20.8307	-0.0295391	0.610446	-0.0483895	0.961406	NA
AF357425	0	NA	NA	NA	NA	NA
AF357426	0	NA	NA	NA	NA	NA
AF366264	0	NA	NA	NA	NA	NA
AF529169	13.9599	-1.8226	0.94978	-1.91897	0.0549884	NA
AI115009	0.507098	0.209995	4.20791	0.0499048	0.960198	NA
AI182371	15.0182	0.57122	0.708983	0.805689	0.420422	NA
AI197445	1.96323	0.390248	2.86498	0.136213	0.891653	NA
AI314180	13.741	-0.596797	0.766965	-0.778127	0.436494	NA
AI314278	1.88993	0	2.85114	0	1	NA
AI413582	212.376	0.172222	0.264005	0.652343	0.51418	0.997916
AI427809	7.68695	1.20356	1.15423	1.04274	0.297068	NA
AI429214	22.0852	-1.11248	0.867372	-1.28259	0.199635	NA
AI450353	45.2029	0.271866	0.42566	0.638693	0.523023	0.997916
AI463170	1.09744	3.23309	3.25764	0.992463	0.320972	NA
AI464131	396.398	0.382045	0.176319	2.16678	0.0302514	0.430627
AI467606	78.689	0.279103	0.344268	0.810714	0.41753	0.997916
AI504432	14.3567	-1.42583	0.806614	-1.76768	0.0771147	NA
AI506816	52.4181	-0.29379	0.421158	-0.697576	0.485443	0.997916
AI507597	0.119353	0	4.99742	0	1	NA
AI593442	5.60749	-1.4048	1.70412	-0.824357	0.409737	NA
AI597479	983.031	-0.0607364	0.133992	-0.453283	0.650345	0.997916
AI606473	0.392975	1.8628	4.98145	0.373947	0.708444	NA
AI607873	1.08443	0	3.3336	0	1	NA
AI646519	0.368482	2.8885	4.88373	0.591454	0.554216	NA
AI661453	1338.38	0.943822	0.256486	3.67982	0.0002334	0.0154282
AI662270	16.0081	-1.8614	0.90554	-2.05557	0.0398243	NA
AI837181	858.889	-0.0868909	0.156118	-0.55657	0.577821	0.997916
AI839979	2.2669	-2.31792	2.15078	-1.07771	0.281163	NA
AI846148	1076.51	0.125493	0.150731	0.832562	0.405092	0.997916
AI847159	1.76903	-0.447509	2.15878	-0.207297	0.835778	NA
AI854703	52.6113	-0.318789	0.415185	-0.767823	0.442592	0.997916
AI987944	272.53	-0.21493	0.213027	-1.00894	0.313005	0.984746
AK010878	285.978	0.185531	0.195555	0.948739	0.342753	0.992451
AU015228	3.06291	1.58013	1.59682	0.989546	0.322396	NA
AU015791	0.852467	0	3.55007	0	1	NA
AU015836	493.121	-0.0444627	0.23803	-0.186795	0.851821	0.997916
AU016765	0	NA	NA	NA	NA	NA
AU018091	2276.05	0.0457062	0.147605	0.309651	0.756826	0.997916
AU019823	1055.66	-0.028797	0.133436	-0.215812	0.829135	0.997916
AU019990	3.67255	0.300228	1.36502	0.219944	0.825915	NA
AU021063	0.392998	-2.67451	4.85846	-0.550485	0.581987	NA
AU021092	6.58084	1.49855	1.06443	1.40784	0.159177	NA
AU022252	417.704	-0.205458	0.161491	-1.27226	0.203282	0.929227
AU022751	82.7336	0.171381	0.318296	0.538433	0.590278	0.997916
AU022754	4.68793	-1.14113	2.40805	-0.473882	0.635584	NA
AU022793	0	NA	NA	NA	NA	NA
AU023762	0.27419	1.86276	4.98145	0.37394	0.708449	NA
AU040320	0.8456	-1.09342	3.5686	-0.306401	0.759299	NA
AU040972	3.34982	0.262376	1.85412	0.14151	0.887467	NA
AU041133	106.858	-0.293823	0.363398	-0.808544	0.418778	0.997916
AV039307	2.66555	-2.18808	2.39975	-0.911796	0.361876	NA
AV051173	1.33757	0.400034	3.05371	0.130999	0.895776	NA
AV064505	0	NA	NA	NA	NA	NA
AV320801	0	NA	NA	NA	NA	NA
AW011738	11.5447	0.0236941	1.20316	0.0196932	0.984288	NA
AW046200	2.98699	1.74051	2.58494	0.673329	0.500738	NA
AW112010	15.5209	0	2.15274	0	1	NA
AW146154	171.966	-0.142483	0.249512	-0.571046	0.567968	0.997916
AW209491	719.749	-0.0882287	0.139351	-0.633141	0.526641	0.997916
AW495222	0.328087	0	4.99742	0	1	NA
AW549542	21.2195	0.61619	0.930814	0.66199	0.507977	NA
AW549877	1867.23	-0.140733	0.134134	-1.0492	0.294088	0.975007
AW551984	131.427	-0.62057	0.381188	-1.62799	0.103528	0.756975
AW554918	390.964	-0.0882671	0.206199	-0.428068	0.668602	0.997916
AW822252	0.929407	0	3.82348	0	1	NA
AY074887	1.05687	0.872751	2.42146	0.360423	0.718531	NA
AY358078	26.0959	0.0399471	0.589221	0.0677965	0.945948	NA
AY512915	0.184241	1.86273	4.98145	0.373934	0.708454	NA
AY512931	4.6397	1.46728	1.40835	1.04184	0.297484	NA
AY702102	0	NA	NA	NA	NA	NA
AY702103	0	NA	NA	NA	NA	NA
AY761184	0.217215	0	4.99742	0	1	NA
AY761185	0	NA	NA	NA	NA	NA
Aaas	2471.49	0.229528	0.163794	1.40132	0.161119	0.875098
Aacs	721.044	-0.135832	0.148011	-0.91772	0.358765	0.992726
Aadac	2.73866	-0.839671	1.81863	-0.461705	0.644293	NA
Aadacl2	0.423035	-1.08896	4.99157	-0.218161	0.827304	NA
Aadacl3	0.097862	0	4.99742	0	1	NA
Aadat	6.46045	-0.678305	1.15979	-0.584851	0.558648	NA
Aaed1	242.841	-0.235689	0.22097	-1.06661	0.286147	0.973288
Aagab	0	NA	NA	NA	NA	NA
Aak1	1873.8	0.190568	0.128278	1.48559	0.137389	0.831785
Aamdc	188.366	-0.00520252	0.283034	-0.0183812	0.985335	1
Aamp	4090.21	-0.0882284	0.169446	-0.520688	0.602584	0.997916
Aanat	0.792992	-1.09088	4.18178	-0.260865	0.794197	NA
Aar2	963.124	-0.0722457	0.134502	-0.537135	0.591174	0.997916
Aard	205.07	-0.357578	0.26221	-1.36371	0.17266	0.887325
Aars	12193.4	-0.00591577	0.113554	-0.0520965	0.958452	0.997916
Aars2	10.4004	-0.014074	0.829028	-0.0169765	0.986455	NA
Aarsd1	1372.65	-0.0677791	0.145051	-0.467278	0.640301	0.997916
Aasdh	507.664	-0.0483063	0.181255	-0.26651	0.789847	0.997916
Aasdhppt	1.27518	-2.05204	2.61386	-0.78506	0.432418	NA
Aass	77.4896	0.306613	0.319756	0.958896	0.337611	0.991614
Aatf	1729.05	-0.169743	0.16251	-1.04451	0.296251	0.975007
Aatk	90.6144	-0.270455	0.382832	-0.706458	0.479904	0.997916
Abat	281.75	0.666822	0.259534	2.5693	0.0101903	0.227551
Abca1	1913.32	0.996786	0.185589	5.37094	7.83264e-08	1.86544e-05
Abca12	4.01571	0.269426	1.71169	0.157404	0.874926	NA
Abca13	13.1967	0.323446	0.84097	0.384611	0.700526	NA
Abca14	2.6986	0.842715	1.71483	0.491427	0.623125	NA
Abca15	0	NA	NA	NA	NA	NA
Abca16	0.871738	0.160998	3.62526	0.0444101	0.964578	NA
Abca17	4.59147	0.362874	1.82586	0.198741	0.842465	NA
Abca2	1076.01	-0.256838	0.176441	-1.45566	0.145486	0.847991
Abca3	1364.47	0.0608093	0.149473	0.406824	0.684138	0.997916
Abca4	17.9275	-0.73772	0.957976	-0.770082	0.441251	NA
Abca5	261.503	-0.433526	0.258021	-1.68019	0.0929194	0.722054
Abca6	0.830056	0.303731	3.46129	0.0877507	0.930075	NA
Abca7	0	NA	NA	NA	NA	NA
Abca8a	0.195724	0	4.99742	0	1	NA
Abca8b	24.458	-0.513179	0.792026	-0.647932	0.517029	NA
Abca9	0.54182	-1.09257	3.74196	-0.291977	0.770305	NA
Abcb10	1167.16	0.183838	0.142521	1.2899	0.197085	0.921977
Abcb11	2.09039	2.8528	2.61782	1.08976	0.275818	NA
Abcb1a	316.38	0.413483	0.186244	2.22012	0.0264108	0.405361
Abcb1b	455.122	-0.386903	0.217302	-1.78049	0.0749964	0.670129
Abcb4	21.5701	-0.431226	0.866755	-0.497518	0.618824	NA
Abcb5	6.07998	1.0074	1.21568	0.828677	0.407287	NA
Abcb6	710.774	0.136873	0.144438	0.94763	0.343318	0.992451
Abcb7	1841.29	0.00782949	0.111256	0.0703738	0.943896	0.997916
Abcb8	763.68	-0.136525	0.151963	-0.898408	0.368968	0.993357
Abcb9	36.3703	0.0919616	0.743223	0.123733	0.901526	NA
Abcc1	1421.51	0.0524546	0.153731	0.34121	0.732945	0.997916
Abcc10	2.76605	0.288692	1.82788	0.157939	0.874505	NA
Abcc12	1.76054	-0.702969	2.38746	-0.294443	0.76842	NA
Abcc2	33.7627	-1.00186	0.680618	-1.47198	0.141026	NA
Abcc3	31.3287	-0.0625636	0.604037	-0.103576	0.917506	NA
Abcc4	2302.18	-0.103879	0.112438	-0.923877	0.35555	0.992536
Abcc5	2745.56	-0.0184514	0.111812	-0.165022	0.868927	0.997916
Abcc6	7.85157	-0.0841185	1.20404	-0.0698634	0.944302	NA
Abcc8	0	NA	NA	NA	NA	NA
Abcc9	13.9154	0.00127274	1.19371	0.0010662	0.999149	NA
Abcd1	394.123	0.117819	0.237479	0.496125	0.619806	0.997916
Abcd2	0	NA	NA	NA	NA	NA
Abcd3	16.387	0.653553	0.766772	0.852343	0.394023	NA
Abcd4	468.382	-0.147417	0.159611	-0.923606	0.355691	0.992536
Abce1	0	NA	NA	NA	NA	NA
Abcf1	5953.58	-0.00785166	0.114271	-0.0687111	0.94522	0.997916
Abcf2	0.221645	-1.08899	4.99157	-0.218167	0.827299	NA
Abcf3	1395.98	-0.0658217	0.12059	-0.54583	0.585183	0.997916
Abcg1	284.826	0.18362	0.186387	0.985158	0.324546	0.986555
Abcg2	94.2033	-0.0185525	0.295514	-0.0627804	0.949941	0.997916
Abcg3	6.61356	0.346055	1.07181	0.322871	0.746793	NA
Abcg4	38.8492	0.592266	0.545097	1.08653	0.277243	0.970773
Abcg5	1.2943	0	3.22737	0	1	NA
Abcg8	0.119353	0	4.99742	0	1	NA
Abhd1	101.86	0.302754	0.297773	1.01673	0.309283	0.980367
Abhd10	627.979	-0.0188742	0.148203	-0.127353	0.898661	0.997916
Abhd11	798.508	0.125409	0.147462	0.850446	0.395077	0.994455
Abhd11os	134.296	-0.0624199	0.324695	-0.192242	0.847553	0.997916
Abhd12	0	NA	NA	NA	NA	NA
Abhd12b	0.097862	0	4.99742	0	1	NA
Abhd13	1178.92	-0.246331	0.133977	-1.83861	0.0659719	0.637159
Abhd14a	61.5838	0.0105881	0.352086	0.0300723	0.976009	0.999438
Abhd14b	120.351	0.393471	0.336426	1.16956	0.242178	0.959035
Abhd15	32.131	0.228133	0.659868	0.345726	0.729549	NA
Abhd16a	703.903	0.114722	0.152176	0.753878	0.450923	0.997916
Abhd16b	1.11567	-2.40405	3.30477	-0.727451	0.46695	NA
Abhd17a	1229.5	0.00184762	0.172433	0.010715	0.991451	1
Abhd17b	1109.56	0.0107372	0.146168	0.0734578	0.941442	0.997916
Abhd17c	1579.69	-0.147944	0.126855	-1.16624	0.243517	0.959716
Abhd18	110.116	-0.0526232	0.296735	-0.177341	0.859241	0.997916
Abhd2	562.674	0.0921502	0.17148	0.53738	0.591005	0.997916
Abhd3	78.44	-0.311772	0.424344	-0.734716	0.462512	0.997916
Abhd4	2696.72	0.24689	0.161102	1.53251	0.125397	0.814553
Abhd5	15.9843	-1.26453	0.913524	-1.38423	0.166288	NA
Abhd6	0	NA	NA	NA	NA	NA
Abhd8	439.139	-0.2792	0.177802	-1.57028	0.116349	0.787437
Abi1	0	NA	NA	NA	NA	NA
Abi2	1771.06	-0.188546	0.115443	-1.63325	0.102417	0.754127
Abi3	37.5438	0.644171	0.467399	1.37821	0.16814	0.883817
Abi3bp	24.72	0.11839	1.11448	0.106229	0.915401	NA
Abl1	3816.59	0.0377886	0.107599	0.351197	0.72544	0.997916
Abl2	2722.57	-0.0896469	0.107627	-0.832943	0.404877	0.997916
Ablim1	15.2284	-0.722746	1.41748	-0.509879	0.610136	NA
Ablim2	35.8238	0.107865	0.53841	0.20034	0.841215	NA
Ablim3	22.2177	-0.947964	0.681827	-1.39033	0.164429	NA
Abo	3.52297	-1.51499	1.45708	-1.03975	0.298457	NA
Abr	38.8463	-0.0243116	0.47553	-0.0511253	0.959226	0.997916
Abra	0	NA	NA	NA	NA	NA
Abracl	685.791	0.221829	0.214992	1.0318	0.302166	0.978817
Abt1	857.137	0.0690718	0.153015	0.451405	0.651697	0.997916
Abtb1	738.051	0.0212196	0.147848	0.143523	0.885877	0.997916
Abtb2	717.451	-0.173515	0.209009	-0.830179	0.406437	0.997916
Acaa1a	2.13853	-1.74374	2.21901	-0.785819	0.431974	NA
Acaa1b	20.6508	0.64247	0.607626	1.05734	0.290355	NA
Acaa2	1066.37	0.244196	0.151397	1.61295	0.106755	0.765243
Acaca	1272.07	-0.0737758	0.132279	-0.55773	0.577029	0.997916
Acacb	647.707	-0.129166	0.172269	-0.749789	0.453382	0.997916
Acad10	309.229	0.246255	0.181537	1.3565	0.174939	0.887901
Acad11	772.617	-0.0623588	0.156752	-0.397819	0.690764	0.997916
Acad12	135.821	0.44189	0.272251	1.6231	0.104568	0.760491
Acad8	780.668	-0.0413407	0.152354	-0.271346	0.786125	0.997916
Acad9	1399.71	-0.00568779	0.122708	-0.0463522	0.96303	0.997916
Acadl	1027.69	-0.207431	0.172728	-1.20091	0.229786	0.945307
Acadm	2078.14	-0.00663446	0.142672	-0.0465015	0.962911	0.997916
Acads	1480.24	0.175758	0.155353	1.13135	0.257909	0.967038
Acadsb	1051.58	-0.0345245	0.137274	-0.251502	0.801426	0.997916
Acadvl	1324.77	0.0447146	0.168458	0.265435	0.790675	0.997916
Acan	161.568	-0.314123	0.237003	-1.3254	0.185039	0.905248
Acap1	106.576	-0.0544867	0.29018	-0.187769	0.851058	0.997916
Acap2	2209.1	-0.0487619	0.117378	-0.415426	0.67783	0.997916
Acap3	421.288	-0.158607	0.168995	-0.938535	0.34797	0.992451
Acat1	1149.71	-0.0200173	0.159593	-0.125427	0.900186	0.997916
Acat2	1419	-0.161905	0.118802	-1.36281	0.172941	0.887325
Acat3	1.83755	-0.948836	2.06088	-0.460404	0.645226	NA
Acbd3	1820.11	-0.0508718	0.165655	-0.307095	0.758771	0.997916
Acbd4	231.699	-0.238475	0.231988	-1.02796	0.303968	0.978817
Acbd5	0	NA	NA	NA	NA	NA
Acbd6	1032.81	-0.0392458	0.146124	-0.268578	0.788254	0.997916
Acbd7	18.5831	-0.461924	0.685595	-0.673757	0.500466	NA
Accs	171.514	0.148627	0.304209	0.48857	0.625146	0.997916
Accsl	245.273	-0.222072	0.212639	-1.04437	0.296316	0.975007
Acd	0	NA	NA	NA	NA	NA
Ace	34.5736	-0.429058	0.554567	-0.773681	0.439119	NA
Ace2	1.69309	0	2.9775	0	1	NA
Ace3	0	NA	NA	NA	NA	NA
Acer1	4.8073	0.190517	1.25377	0.151955	0.879222	NA
Acer2	770.152	0.308199	0.152986	2.01455	0.0439519	0.524578
Acer3	432.015	-0.38868	0.184191	-2.1102	0.034841	0.463776
Ache	14.4081	-1.26763	1.34196	-0.944612	0.344857	NA
Acin1	8594.54	0.0105551	0.0948816	0.111245	0.911422	0.997916
Ackr1	5.03003	0	2.42414	0	1	NA
Ackr2	0.825626	1.24228	3.27119	0.379765	0.70412	NA
Ackr3	932.166	0.128301	0.214167	0.599071	0.549126	0.997916
Ackr4	1.99678	-0.997531	2.51717	-0.396291	0.69189	NA
Acly	12784.6	0.0865604	0.0949315	0.91182	0.361863	0.993357
Acmsd	0	NA	NA	NA	NA	NA
Acnat1	5.00068	0.121366	1.37874	0.0880271	0.929855	NA
Acnat2	0	NA	NA	NA	NA	NA
Aco1	2640.31	-0.197478	0.14361	-1.3751	0.169102	0.883817
Aco2	5721.55	0.125395	0.109429	1.1459	0.251835	0.961342
Acod1	0.097862	0	4.99742	0	1	NA
Acot1	489.437	0.0558271	0.188335	0.296425	0.766906	0.997916
Acot10	215.989	0.0660115	0.266036	0.24813	0.804034	0.997916
Acot11	0	NA	NA	NA	NA	NA
Acot12	1.17066	1.37467	2.81223	0.488819	0.62497	NA
Acot13	576.009	-0.0126424	0.161063	-0.0784931	0.937436	0.997916
Acot2	276.015	-0.120917	0.253292	-0.47738	0.633092	0.997916
Acot3	0.123783	-1.08901	4.99157	-0.21817	0.827296	NA
Acot4	6.33416	-0.568764	1.12248	-0.506703	0.612363	NA
Acot5	0	NA	NA	NA	NA	NA
Acot6	18.7115	-0.270096	0.788947	-0.34235	0.732087	NA
Acot7	1413.55	0.0452113	0.176117	0.256712	0.797401	0.997916
Acot8	317.829	0.181795	0.199331	0.912023	0.361756	0.993357
Acot9	911.477	-0.202268	0.230894	-0.876021	0.381018	0.993357
Acox1	1888.09	0.0940444	0.175103	0.537081	0.591212	0.997916
Acox2	2.19663	0.316842	2.62981	0.120481	0.904102	NA
Acox3	0	NA	NA	NA	NA	NA
Acoxl	6.69033	0.351212	1.09478	0.320807	0.748356	NA
Acp1	723.069	0.0288367	0.150108	0.192106	0.847659	0.997916
Acp2	0	NA	NA	NA	NA	NA
Acp5	388.408	0.502724	0.230287	2.18303	0.0290333	0.425684
Acp6	2453.81	0.338746	0.10664	3.17654	0.00149045	0.0593834
Acp7	9.76618	0.449976	0.849826	0.529492	0.596464	NA
Acpp	129.367	0.89481	0.50777	1.76223	0.0780297	0.678981
Acpt	0	NA	NA	NA	NA	NA
Acr	1.43439	2.6707	2.77298	0.963115	0.33549	NA
Acrbp	177.507	-0.0676806	0.263188	-0.257157	0.797058	0.997916
Acrv1	0	NA	NA	NA	NA	NA
Acsbg1	18.6908	0.224069	0.646653	0.346505	0.728963	NA
Acsbg2	11.0636	0.307637	0.86707	0.3548	0.722739	NA
Acsf2	710.455	1.70267	0.162684	10.4661	1.23631e-25	1.7979e-22
Acsf3	328.946	-0.4298	0.189558	-2.26738	0.023367	0.379733
Acsl1	654.989	-0.350769	0.149988	-2.33865	0.0193533	0.338073
Acsl3	2006.02	-0.168304	0.116997	-1.43854	0.150281	0.855674
Acsl4	2352.37	-0.607314	0.123625	-4.91256	8.98945e-07	0.000141329
Acsl5	579.628	-0.362538	0.168538	-2.15108	0.0314697	0.439749
Acsl6	100.039	-0.141059	0.310511	-0.45428	0.649628	0.997916
Acsm1	0	NA	NA	NA	NA	NA
Acsm2	0.303594	1.86277	4.98145	0.373941	0.708449	NA
Acsm3	26.2684	1.76521	2.09022	0.844508	0.398386	NA
Acsm4	0	NA	NA	NA	NA	NA
Acsm5	0	NA	NA	NA	NA	NA
Acss1	122.898	-0.132995	0.308774	-0.43072	0.666672	0.997916
Acss2	334.529	0.0399373	0.199609	0.200077	0.84142	0.997916
Acss2os	0	NA	NA	NA	NA	NA
Acss3	34.4149	-1.67677	0.930407	-1.80219	0.0715163	NA
Acta1	111.967	-0.161755	0.431903	-0.374517	0.70802	0.997916
Acta2	1636.79	0.10266	0.435771	0.235581	0.813757	0.997916
Actb	51116.1	-0.0433801	0.19885	-0.218155	0.827308	0.997916
Actbl2	0	NA	NA	NA	NA	NA
Actc1	11.0735	-1.11529	1.27696	-0.873397	0.382446	NA
Actg1	818.258	0.028288	0.160074	0.176718	0.85973	0.997916
Actg2	46.0141	0.101033	0.409293	0.246847	0.805027	0.997916
Actl10	1.08786	0.705144	2.84745	0.24764	0.804413	NA
Actl11	0	NA	NA	NA	NA	NA
Actl6a	4104.32	0.00821878	0.0979357	0.0839201	0.93312	0.997916
Actl6b	8.3468	-1.65477	1.54345	-1.07213	0.283664	NA
Actl7a	0.145431	-1.20651	4.98374	-0.24209	0.808711	NA
Actl7b	5.52642	-0.717702	1.22827	-0.58432	0.559005	NA
Actl9	0.097862	0	4.99742	0	1	NA
Actn1	54.7008	0.17527	0.473586	0.370092	0.711314	0.997916
Actn2	39.219	-0.955066	0.463064	-2.06249	0.0391608	0.49414
Actn3	1016.94	0.267652	0.150651	1.77663	0.0756284	0.674009
Actn4	17882.9	0.386416	0.180104	2.14552	0.0319116	0.442503
Actr10	1813.43	0.0173017	0.130416	0.132665	0.894458	0.997916
Actr1a	2915.1	-0.0213141	0.130729	-0.163041	0.870486	0.997916
Actr1b	2320.08	-0.0677805	0.142976	-0.47407	0.63545	0.997916
Actr2	9942	0.0951829	0.153658	0.619447	0.535622	0.997916
Actr3	3482.18	-0.106713	0.149578	-0.713426	0.475582	0.997916
Actr3b	431.9	-0.139686	0.161264	-0.866195	0.386383	0.994455
Actr5	429.775	-0.111334	0.159033	-0.70007	0.483883	0.997916
Actr6	626.766	-0.0373135	0.149929	-0.248875	0.803458	0.997916
Actr8	1190.65	0.0503336	0.14908	0.337627	0.735644	0.997916
Actrt1	0	NA	NA	NA	NA	NA
Actrt2	0	NA	NA	NA	NA	NA
Actrt3	3.24947	0.288456	1.52443	0.189223	0.849918	NA
Acvr1	1.18147	-0.633943	2.34051	-0.270857	0.786501	NA
Acvr1b	1103.12	0.243811	0.13891	1.75517	0.0792309	0.680604
Acvr1c	0.856995	0	3.57463	0	1	NA
Acvr2a	921.61	-0.0364046	0.15493	-0.234974	0.814229	0.997916
Acvr2b	2480.02	-0.151495	0.182777	-0.828851	0.407189	0.997916
Acvrl1	40.7331	1.16246	0.429036	2.70948	0.00673892	0.173726
Acy1	810.764	-0.241302	0.143556	-1.68089	0.0927845	0.721636
Acy3	98.9222	0.17012	0.311455	0.546211	0.584921	0.997916
Acyp1	239.026	-0.163052	0.210687	-0.773904	0.438987	0.997916
Acyp2	52.0128	0.00580494	0.425289	0.0136494	0.98911	1
Ada	178.227	0.0176416	0.225352	0.0782846	0.937602	0.997916
Adad1	14.2543	-0.378766	0.714042	-0.530454	0.595797	NA
[truncated: 22,466 more rows]

## Sheet: Day6_K27AvsKOcontrol
	baseMean	log2FoldChange	lfcSE	stat	pvalue	padj
0610005C13Rik	8.78212	2.27638	2.04611	1.11254	0.265906	NA
0610007P14Rik	1020.01	0.135878	0.159407	0.8524	0.393992	0.673512
0610009B22Rik	722.908	0.0420765	0.13749	0.306033	0.759579	0.901403
0610009L18Rik	13.2865	0.704678	0.703798	1.00125	0.316706	0.601381
0610009O20Rik	1334.98	0.0324385	0.137597	0.23575	0.813627	0.925961
0610010B08Rik	0	NA	NA	NA	NA	NA
0610010F05Rik	0	NA	NA	NA	NA	NA
0610010K14Rik	997.62	-0.0949747	0.176908	-0.53686	0.591364	0.810042
0610011F06Rik	463.255	0.104115	0.162194	0.641915	0.520928	0.766494
0610012G03Rik	526.37	-0.19805	0.197183	-1.0044	0.315187	0.60033
0610030E20Rik	568.948	-0.0144303	0.144781	-0.09967	0.920606	0.969317
0610031O16Rik	0	NA	NA	NA	NA	NA
0610037L13Rik	0.906206	-1.03602	3.53577	-0.29301	0.769514	NA
0610038B21Rik	8.66921	0.122066	0.955646	0.127731	0.898362	NA
0610039H22Rik	0.368482	0	4.99758	0	1	NA
0610039K10Rik	4.03436	0.370197	1.40082	0.264272	0.79157	NA
0610040B10Rik	24.2917	0.279366	0.551714	0.506361	0.612603	0.823592
0610040F04Rik	37.7785	1.47219	1.04902	1.40339	0.1605	0.411375
0610040J01Rik	126.865	0.370973	0.28584	1.29783	0.194344	0.460744
0610043K17Rik	6.31738	0.214505	1.15828	0.185192	0.853079	NA
1010001N08Rik	87.8044	-2.57186	0.40272	-6.38622	1.70039e-10	1.03786e-08
1110001J03Rik	310.942	0.104552	0.209736	0.498493	0.618137	0.826
1110002L01Rik	595.384	0.226566	0.164264	1.37928	0.167809	0.423401
1110004E09Rik	824.377	0.123326	0.169323	0.728346	0.466402	0.727624
1110004F10Rik	1897.39	0.118441	0.131739	0.899058	0.368622	0.650674
1110006O24Rik	27.8885	-0.110597	0.590939	-0.187155	0.851539	0.942661
1110008F13Rik	2376.32	-0.181552	0.150846	-1.20356	0.228759	0.506835
1110008L16Rik	798.588	0.242328	0.141916	1.70754	0.0877215	0.282883
1110008P14Rik	318.543	-0.457838	0.212534	-2.15418	0.0312257	0.139348
1110012L19Rik	320.236	0.063181	0.217265	0.290802	0.771203	0.906646
1110015O18Rik	0	NA	NA	NA	NA	NA
1110017D15Rik	0.977012	-0.771822	2.67681	-0.288336	0.773089	NA
1110019D14Rik	80.4972	0.0379509	0.326486	0.11624	0.907462	0.964493
1110020A21Rik	7.37238	0.313369	1.08755	0.288143	0.773237	NA
1110025L11Rik	0.209303	-0.260891	4.97332	-0.0524581	0.958164	NA
1110028F11Rik	0.541918	1.86382	4.4358	0.420176	0.674357	NA
1110028F18Rik	0.786765	0	4.05586	0	1	NA
1110032A03Rik	190.617	0.232485	0.227203	1.02325	0.306191	0.591843
1110032F04Rik	36.4461	-0.00814962	0.516776	-0.0157701	0.987418	0.996095
1110034G24Rik	0.879871	2.58786	3.81643	0.678085	0.497718	NA
1110036E04Rik	0	NA	NA	NA	NA	NA
1110037F02Rik	0.184241	0	4.99758	0	1	NA
1110038B12Rik	1335.39	0.0443984	0.136427	0.325438	0.74485	0.894716
1110038F14Rik	0	NA	NA	NA	NA	NA
1110046J04Rik	7.5054	-0.997416	0.958383	-1.04073	0.298002	NA
1110051M20Rik	309.184	0.148915	0.205829	0.723487	0.46938	0.73029
1110058D11Rik	0	NA	NA	NA	NA	NA
1110059E24Rik	912.841	0.185551	0.14024	1.32309	0.185806	0.448749
1110059G10Rik	372.818	-0.193488	0.194677	-0.99389	0.320276	0.604175
1110065P20Rik	6.01852	-0.664531	1.03155	-0.644205	0.519443	NA
1190002N15Rik	1005.35	0.596201	0.146038	4.08252	4.45509e-05	0.000744066
1190003K10Rik	0	NA	NA	NA	NA	NA
1190005I06Rik	1.68322	-0.182625	2.70283	-0.067568	0.94613	NA
1190007I07Rik	220.225	-0.117811	0.210564	-0.559504	0.575818	0.799715
1300002E11Rik	223.326	0.0363746	0.206357	0.176271	0.860081	0.946809
1300017J02Rik	10.6075	0.0132186	0.888812	0.0148722	0.988134	0.996296
1500004A13Rik	5.81429	-0.574822	1.14454	-0.502228	0.615507	NA
1500009C09Rik	13.308	-1.54487	1.18813	-1.30025	0.193515	0.459426
1500009L16Rik	701.594	-1.43209	0.305065	-4.69437	2.67435e-06	6.36722e-05
1500011B03Rik	386.165	0.0223785	0.195008	0.114757	0.908638	0.965131
1500011K16Rik	274.844	-0.0500007	0.200713	-0.249116	0.803271	0.921605
1500012K07Rik	0	NA	NA	NA	NA	NA
1500015A07Rik	161.872	0.0558279	0.236468	0.236091	0.813362	0.925892
1500015L24Rik	0	NA	NA	NA	NA	NA
1500015O10Rik	7.20547	0.930906	1.57546	0.590879	0.554601	NA
1500017E21Rik	0.0899492	1.28606	4.99	0.257727	0.796618	NA
1500026H17Rik	5.68017	0.096414	1.11302	0.0866239	0.93097	NA
1600002D24Rik	0.264784	-1.66094	4.98092	-0.333461	0.738787	NA
1600002H07Rik	940.066	-1.47671	0.263224	-5.6101	2.02214e-08	8.05735e-07
1600002K03Rik	73.8643	-0.381803	0.318056	-1.20043	0.229973	0.508173
1600010M07Rik	0	NA	NA	NA	NA	NA
1600012H06Rik	897.357	-0.261461	0.144093	-1.81452	0.0695976	0.2418
1600014C10Rik	248.74	-0.258581	0.200564	-1.28927	0.197304	0.465608
1600014C23Rik	3.83728	-4.21253	2.04256	-2.06238	0.0391716	NA
1600015I10Rik	0.110872	1.43864	4.98009	0.288878	0.772675	NA
1600019K03Rik	0.523715	0	4.99758	0	1	NA
1600020E01Rik	155.123	-0.275863	0.303502	-0.908933	0.363385	0.645317
1600023N17Rik	5.68505	-0.993101	1.20721	-0.82264	0.410713	NA
1600025M17Rik	4.01353	-0.327717	1.36172	-0.240665	0.809815	NA
1600027J07Rik	1.53871	-1.1681	2.09606	-0.557285	0.577333	NA
1600029I14Rik	0	NA	NA	NA	NA	NA
1600029O15Rik	4.99556	-0.791741	1.16291	-0.680826	0.495982	NA
1700001C02Rik	0.405984	2.46689	4.88307	0.505192	0.613424	NA
1700001C19Rik	1.97026	0.108784	2.06915	0.0525741	0.958071	NA
1700001D01Rik	0	NA	NA	NA	NA	NA
1700001F09Rik	0	NA	NA	NA	NA	NA
1700001G01Rik	0	NA	NA	NA	NA	NA
1700001G11Rik	9.26783	-1.05189	0.938152	-1.12124	0.262187	NA
1700001G17Rik	7.59769	0.137298	0.950376	0.144467	0.885132	NA
1700001J03Rik	1.40812	-1.14414	2.56	-0.44693	0.654926	NA
1700001J11Rik	1.91746	4.51957	2.45269	1.8427	0.0653728	NA
1700001K19Rik	0.195724	-2.42752	4.90277	-0.495132	0.620507	NA
1700001K23Rik	0	NA	NA	NA	NA	NA
1700001L05Rik	1144.93	0.31971	0.138551	2.30752	0.0210258	0.104685
1700001L19Rik	3.08091	1.01928	1.54557	0.659488	0.509582	NA
1700001O22Rik	36.0094	0.45915	0.462655	0.992426	0.32099	0.604708
1700001P01Rik	7.35654	-0.399411	1.04273	-0.383045	0.701687	NA
1700003C15Rik	0	NA	NA	NA	NA	NA
1700003D09Rik	0.295113	1.43865	4.98009	0.288881	0.772673	NA
1700003E16Rik	5.11611	1.00764	1.30953	0.769467	0.441616	NA
1700003E24Rik	0	NA	NA	NA	NA	NA
1700003F12Rik	7.30115	-1.69126	1.12469	-1.50375	0.132645	NA
1700003G13Rik	0	NA	NA	NA	NA	NA
1700003G18Rik	0.732263	-1.52039	3.74621	-0.405848	0.684855	NA
1700003H04Rik	0	NA	NA	NA	NA	NA
1700003I22Rik	0	NA	NA	NA	NA	NA
1700003L19Rik	0	NA	NA	NA	NA	NA
1700003M07Rik	32.1637	1.05743	0.485448	2.17825	0.0293872	0.133857
1700003P14Rik	0.152365	0	4.99758	0	1	NA
1700006A11Rik	0	NA	NA	NA	NA	NA
1700006E09Rik	0.123783	0	4.99758	0	1	NA
1700006F04Rik	0.0899492	1.28606	4.99	0.257727	0.796618	NA
1700006H21Rik	0	NA	NA	NA	NA	NA
1700007B14Rik	0	NA	NA	NA	NA	NA
1700007F19Rik	0.217215	-2.56247	4.89236	-0.52377	0.600439	NA
1700007G11Rik	3.67882	-0.667393	1.47331	-0.452988	0.650558	NA
1700007J10Rik	0.110872	1.43864	4.98009	0.288878	0.772675	NA
1700007K09Rik	1.65071	-0.669679	2.13891	-0.313093	0.75421	NA
1700007K13Rik	155.074	0.718984	0.29178	2.46413	0.0137345	0.0777517
1700007L15Rik	49.8124	0.092273	0.406254	0.227131	0.820322	0.928619
1700007P06Rik	0	NA	NA	NA	NA	NA
1700008C04Rik	0.145431	0	4.99758	0	1	NA
1700008J07Rik	100.798	0.14596	0.280417	0.520508	0.602709	0.816668
1700008K24Rik	0	NA	NA	NA	NA	NA
1700008O03Rik	29.5044	-0.34841	0.489371	-0.711954	0.476493	0.735865
1700008P02Rik	0	NA	NA	NA	NA	NA
1700009C05Rik	0	NA	NA	NA	NA	NA
1700009J07Rik	0	NA	NA	NA	NA	NA
1700009N14Rik	1.11467	2.33171	2.78889	0.83607	0.403116	NA
1700010B08Rik	0.110872	1.43864	4.98009	0.288878	0.772675	NA
1700010D01Rik	0.455959	-1.6595	4.87801	-0.340199	0.733706	NA
1700010I02Rik	0	NA	NA	NA	NA	NA
1700010I14Rik	0.110872	1.43864	4.98009	0.288878	0.772675	NA
1700010J16Rik	0	NA	NA	NA	NA	NA
1700010K23Rik	0	NA	NA	NA	NA	NA
1700011B04Rik	0.184241	0	4.99758	0	1	NA
1700011C11Rik	0	NA	NA	NA	NA	NA
1700011E24Rik	0.480452	-1.02194	4.14523	-0.246534	0.805269	NA
1700011H14Rik	18.6824	-0.475288	0.631092	-0.753121	0.451377	0.718395
1700011I03Rik	0.533338	1.56014	3.95384	0.394588	0.693147	NA
1700011L22Rik	0	NA	NA	NA	NA	NA
1700011M02Rik	0	NA	NA	NA	NA	NA
1700012A03Rik	0	NA	NA	NA	NA	NA
1700012B07Rik	0.573943	0	4.54188	0	1	NA
1700012B09Rik	0.881968	0	3.53672	0	1	NA
1700012C14Rik	2.99301	1.68218	1.71131	0.982975	0.32562	NA
1700012D01Rik	6.30021	-2.17246	1.25602	-1.72964	0.0836954	NA
1700012D14Rik	5.81331	0.277907	1.08428	0.256305	0.797716	NA
1700012D16Rik	0	NA	NA	NA	NA	NA
1700012H19Rik	0	NA	NA	NA	NA	NA
1700012I11Rik	0	NA	NA	NA	NA	NA
1700012L04Rik	0.431808	0	4.99758	0	1	NA
1700012P22Rik	0	NA	NA	NA	NA	NA
1700013D24Rik	0.145431	0	4.99758	0	1	NA
1700013F07Rik	1.69753	-0.753317	1.93489	-0.389333	0.69703	NA
1700013G24Rik	0.493363	-2.56191	4.11114	-0.623161	0.533179	NA
1700013H16Rik	4.01139	-0.771219	1.38915	-0.555172	0.578777	NA
1700015E13Rik	0	NA	NA	NA	NA	NA
1700015F17Rik	0.844682	-2.56065	3.24043	-0.790221	0.429399	NA
1700015G11Rik	0	NA	NA	NA	NA	NA
1700016C15Rik	0.209303	-0.260891	4.97332	-0.0524581	0.958164	NA
1700016D06Rik	2.37592	0	2.73801	0	1	NA
1700016G22Rik	0.303594	-1.66096	4.98092	-0.333464	0.738784	NA
1700016H13Rik	2.43113	0.234509	1.69628	0.138249	0.890044	NA
1700016K19Rik	11.2841	-0.420956	0.865024	-0.486641	0.626513	0.830338
1700016L04Rik	0.627376	2.87457	3.73956	0.768692	0.442076	NA
1700016L21Rik	0	NA	NA	NA	NA	NA
1700016P04Rik	0.119353	-1.66094	4.98092	-0.333461	0.738787	NA
1700017B05Rik	2438.41	0.510768	0.188602	2.70818	0.00676532	0.0458365
1700017D01Rik	0	NA	NA	NA	NA	NA
1700017G19Rik	0	NA	NA	NA	NA	NA
1700017J07Rik	1.39976	-1.05878	2.32675	-0.455049	0.649074	NA
1700017L05Rik	0	NA	NA	NA	NA	NA
1700017N19Rik	0.119353	-1.66094	4.98092	-0.333461	0.738787	NA
1700018A04Rik	0	NA	NA	NA	NA	NA
1700018B08Rik	0	NA	NA	NA	NA	NA
1700018B24Rik	1.96308	-1.24258	1.98884	-0.624775	0.532119	NA
1700018C11Rik	0	NA	NA	NA	NA	NA
1700018F24Rik	0	NA	NA	NA	NA	NA
1700018G05Rik	0	NA	NA	NA	NA	NA
1700018L02Rik	8.7338	0.543258	0.992211	0.547522	0.58402	NA
1700019A02Rik	6.89381	0.28474	1.50997	0.188573	0.850428	NA
1700019B03Rik	0.969509	1.4672	3.05992	0.479491	0.63159	NA
1700019B21Rik	2.02763	0.407763	1.8421	0.221357	0.824814	NA
1700019C18Rik	0	NA	NA	NA	NA	NA
1700019D03Rik	250.697	0.606908	0.382898	1.58504	0.112957	0.333727
1700019E08Rik	0.200821	2.33512	4.89236	0.4773	0.633149	NA
1700019G24Rik	0	NA	NA	NA	NA	NA
1700019M22Rik	0	NA	NA	NA	NA	NA
1700019N19Rik	0.097862	-1.51612	4.99038	-0.303808	0.761274	NA
1700019O17Rik	1.68226	0	3.0047	0	1	NA
1700020A23Rik	0	NA	NA	NA	NA	NA
1700020D05Rik	9.87268	-0.384694	0.851635	-0.451712	0.651476	NA
1700020D14Rik	0	NA	NA	NA	NA	NA
1700020G17Rik	0	NA	NA	NA	NA	NA
1700020I14Rik	779.491	-0.183029	0.131455	-1.39233	0.163823	0.41679
1700020L24Rik	2.8659	-0.0851216	1.4662	-0.0580558	0.953704	NA
1700020M21Rik	0.0899492	1.28606	4.99	0.257727	0.796618	NA
1700020N01Rik	4.33111	1.30912	2.37192	0.551925	0.581	NA
1700020N15Rik	2.02699	0	2.86242	0	1	NA
1700020N18Rik	0	NA	NA	NA	NA	NA
1700021F05Rik	652.088	0.143589	0.17979	0.79865	0.424493	0.698455
1700021F07Rik	0	NA	NA	NA	NA	NA
1700021N21Rik	0.364139	2.1927	4.90337	0.447182	0.654744	NA
1700022A21Rik	0	NA	NA	NA	NA	NA
1700022A22Rik	0	NA	NA	NA	NA	NA
1700022E09Rik	0.097862	-1.51612	4.99038	-0.303808	0.761274	NA
1700022H01Rik	0.209303	-0.260891	4.97332	-0.0524581	0.958164	NA
1700022H16Rik	0	NA	NA	NA	NA	NA
1700022I11Rik	0	NA	NA	NA	NA	NA
1700023C21Rik	0	NA	NA	NA	NA	NA
1700023F02Rik	0	NA	NA	NA	NA	NA
1700023F06Rik	29.9835	0.310747	0.557021	0.557874	0.57693	0.800643
1700024B18Rik	0	NA	NA	NA	NA	NA
1700024F13Rik	10.7546	-0.0279393	0.983082	-0.02842	0.977327	0.991654
1700024G13Rik	0.269214	0	4.99758	0	1	NA
1700024I08Rik	0	NA	NA	NA	NA	NA
1700024N05Rik	0	NA	NA	NA	NA	NA
1700024P04Rik	0	NA	NA	NA	NA	NA
1700024P16Rik	4.03649	0.401913	1.24749	0.322178	0.747318	NA
1700025B11Rik	0.152365	0	4.99758	0	1	NA
1700025C18Rik	0	NA	NA	NA	NA	NA
1700025F22Rik	0	NA	NA	NA	NA	NA
1700025F24Rik	0.145431	0	4.99758	0	1	NA
1700025G04Rik	542.413	-0.498602	0.168086	-2.96635	0.00301361	0.0246598
1700025J12Rik	0	NA	NA	NA	NA	NA
1700025K24Rik	0	NA	NA	NA	NA	NA
1700025M24Rik	0	NA	NA	NA	NA	NA
1700025N23Rik	0.097862	-1.51612	4.99038	-0.303808	0.761274	NA
1700026D11Rik	0.123783	0	4.99758	0	1	NA
1700026F02Rik	0.184241	0	4.99758	0	1	NA
1700026J14Rik	1.08687	-0.525055	2.56011	-0.205091	0.837501	NA
1700027A15Rik	0	NA	NA	NA	NA	NA
1700027F06Rik	0	NA	NA	NA	NA	NA
1700027F09Rik	0	NA	NA	NA	NA	NA
1700027H10Rik	0	NA	NA	NA	NA	NA
1700027I24Rik	0.739832	0	4.79345	0	1	NA
1700027J07Rik	0.372052	-0.116067	4.98279	-0.0232936	0.981416	NA
1700028B04Rik	4.58565	-3.82593	1.9841	-1.92829	0.0538186	NA
1700028D13Rik	0.119353	-1.66094	4.98092	-0.333461	0.738787	NA
1700028E10Rik	4.84135	-0.52254	1.29552	-0.403343	0.686696	NA
1700028I16Rik	19.6979	-1.12361	0.835349	-1.34508	0.178599	0.438352
1700028J19Rik	8.89946	0.63401	0.940209	0.674329	0.500102	NA
1700028K03Rik	1.84519	-2.08786	1.97313	-1.05815	0.289987	NA
1700028M03Rik	0.152365	0	4.99758	0	1	NA
1700028P14Rik	0.179898	2.19269	4.90337	0.447181	0.654745	NA
1700028P15Rik	0	NA	NA	NA	NA	NA
1700029B22Rik	0	NA	NA	NA	NA	NA
1700029F12Rik	4.32121	-0.202053	1.38204	-0.146199	0.883765	NA
1700029H14Rik	0.777112	-1.66972	3.21983	-0.518572	0.604059	NA
1700029I15Rik	6.04399	-0.433815	1.04326	-0.415826	0.677537	NA
1700029J03Rik	0	NA	NA	NA	NA	NA
1700029J07Rik	13.8701	-0.106637	0.824134	-0.129392	0.897047	0.960508
1700029M20Rik	5.60397	0	2.33815	0	1	NA
1700029N11Rik	0	NA	NA	NA	NA	NA
1700029P11Rik	198.026	-1.28822	0.487385	-2.64312	0.00821462	0.0530572
1700030A11Rik	0	NA	NA	NA	NA	NA
1700030C10Rik	172.506	0.196123	0.236696	0.828585	0.407339	0.684746
1700030F04Rik	0	NA	NA	NA	NA	NA
1700030F18Rik	0	NA	NA	NA	NA	NA
1700030J22Rik	0	NA	NA	NA	NA	NA
1700030K09Rik	305.683	0.106413	0.188044	0.565892	0.571467	0.797595
1700030L20Rik	0	NA	NA	NA	NA	NA
1700030M09Rik	0.811516	-3.26852	3.55993	-0.918142	0.358545	NA
1700030N03Rik	0.508845	2.33447	4.08369	0.571656	0.567555	NA
1700030O20Rik	0.097862	-1.51612	4.99038	-0.303808	0.761274	NA
1700031A10Rik	0.247567	0	4.99758	0	1	NA
1700031F05Rik	1.02727	-2.20832	3.30977	-0.667212	0.504637	NA
1700031M16Rik	0	NA	NA	NA	NA	NA
1700031P21Rik	0	NA	NA	NA	NA	NA
1700034E13Rik	0	NA	NA	NA	NA	NA
1700034G24Rik	0	NA	NA	NA	NA	NA
1700034H15Rik	16.6821	-0.144702	0.791517	-0.182815	0.854943	0.944369
1700034I23Rik	0	NA	NA	NA	NA	NA
1700034J05Rik	0	NA	NA	NA	NA	NA
1700034K08Rik	0.123783	0	4.99758	0	1	NA
1700034O15Rik	0	NA	NA	NA	NA	NA
1700034P13Rik	6.53973	-0.439396	1.0837	-0.405461	0.685139	NA
1700036G14Rik	0	NA	NA	NA	NA	NA
1700037C18Rik	38.8777	0.265966	0.465057	0.5719	0.56739	0.795485
1700037H04Rik	1470.77	-0.145985	0.170039	-0.858538	0.390595	0.67058
1700039E15Rik	1.29893	0.63556	2.32707	0.273116	0.784764	NA
1700039E22Rik	0	NA	NA	NA	NA	NA
1700040L02Rik	1.03414	1.63679	2.68986	0.608505	0.542852	NA
1700041A01Rik	0	NA	NA	NA	NA	NA
1700041C23Rik	0.152365	0	4.99758	0	1	NA
1700041M19Rik	0	NA	NA	NA	NA	NA
1700042G07Rik	0	NA	NA	NA	NA	NA
1700042G15Rik	1.64103	-1.71772	2.33527	-0.735555	0.462002	NA
1700042O10Rik	18.9345	-0.95514	1.09871	-0.869331	0.384666	0.665819
1700044C05Rik	0.487835	-1.66097	4.98092	-0.333466	0.738783	NA
1700044K03Rik	0	NA	NA	NA	NA	NA
1700045H11Rik	0	NA	NA	NA	NA	NA
1700046C09Rik	0	NA	NA	NA	NA	NA
1700047A11Rik	0	NA	NA	NA	NA	NA
1700047E10Rik	0.238707	-2.68782	4.88351	-0.550387	0.582054	NA
1700047G03Rik	0	NA	NA	NA	NA	NA
1700047I17Rik2	0	NA	NA	NA	NA	NA
1700047L14Rik	0	NA	NA	NA	NA	NA
1700047M11Rik	0	NA	NA	NA	NA	NA
1700048M11Rik	0	NA	NA	NA	NA	NA
1700048O20Rik	15.942	0.521672	0.683711	0.763001	0.445463	0.713804
1700049E15Rik	0.27776	0.790573	4.89604	0.161472	0.871722	NA
1700049E22Rik	1.73865	0	2.98736	0	1	NA
1700049G17Rik	133.845	0.554504	0.292982	1.89262	0.0584082	0.21476
1700049L16Rik	0	NA	NA	NA	NA	NA
1700051A21Rik	0.758212	-0.115646	2.9895	-0.0386842	0.969142	NA
1700052I22Rik	0	NA	NA	NA	NA	NA
1700052K11Rik	265.018	0.2193	0.20181	1.08667	0.277185	0.56097
1700054A03Rik	0.780527	-1.17674	3.01747	-0.389974	0.696556	NA
1700054K19Rik	0	NA	NA	NA	NA	NA
1700054M17Rik	0.152365	0	4.99758	0	1	NA
1700055C04Rik	0	NA	NA	NA	NA	NA
1700056E22Rik	17.494	-0.712208	0.655367	-1.08673	0.277156	0.56097
1700057G04Rik	0.315077	-3.10256	4.85905	-0.63851	0.523142	NA
1700057H15Rik	0	NA	NA	NA	NA	NA
1700057H21Rik	8.66158	0	2.24259	0	1	NA
1700060C16Rik	0	NA	NA	NA	NA	NA
1700060C20Rik	0.6402	-1.65034	4.33802	-0.380436	0.703622	NA
1700061F12Rik	0.209303	-0.260891	4.97332	-0.0524581	0.958164	NA
1700061G19Rik	262.771	0.305283	0.802648	0.380345	0.70369	0.873128
1700061I17Rik	0.380719	3.26249	4.84169	0.673833	0.500418	NA
1700061J23Rik	0.110872	1.43864	4.98009	0.288878	0.772675	NA
1700063A18Rik	0	NA	NA	NA	NA	NA
1700063D05Rik	0.499439	-0.108995	4.21249	-0.0258743	0.979358	NA
1700063O14Rik	0	NA	NA	NA	NA	NA
1700064J06Rik	0	NA	NA	NA	NA	NA
1700064M15Rik	0.200821	2.33512	4.89236	0.4773	0.633149	NA
1700065D16Rik	3.07284	0.198489	1.65629	0.11984	0.90461	NA
1700065I16Rik	0	NA	NA	NA	NA	NA
1700065J11Rik	0	NA	NA	NA	NA	NA
1700065J18Rik	0	NA	NA	NA	NA	NA
1700065L07Rik	0	NA	NA	NA	NA	NA
1700065O20Rik	0	NA	NA	NA	NA	NA
1700066B17Rik	0.250226	-1.51611	4.99038	-0.303807	0.761275	NA
1700066B19Rik	3.13581	0.252328	1.45789	0.173077	0.862591	NA
1700066J03Rik	0.097862	-1.51612	4.99038	-0.303808	0.761274	NA
1700066M21Rik	264.552	-0.151012	0.203786	-0.74103	0.458675	0.723048
1700066N21Rik	0	NA	NA	NA	NA	NA
1700066O22Rik	0	NA	NA	NA	NA	NA
1700067G17Rik	0	NA	NA	NA	NA	NA
1700067K01Rik	19.0987	-0.0758472	0.678971	-0.111709	0.911054	0.966303
1700067P10Rik	0	NA	NA	NA	NA	NA
1700069L16Rik	0.499595	0.0332394	4.78668	0.00694416	0.994459	NA
1700069P05Rik	0	NA	NA	NA	NA	NA
1700071K01Rik	0.414466	-0.108313	4.96337	-0.0218224	0.98259	NA
1700071M16Rik	0	NA	NA	NA	NA	NA
1700072B07Rik	0	NA	NA	NA	NA	NA
1700072I22Rik	0	NA	NA	NA	NA	NA
1700072O05Rik	0	NA	NA	NA	NA	NA
1700073E17Rik	0.152365	0	4.99758	0	1	NA
1700074P13Rik	0	NA	NA	NA	NA	NA
1700080E11Rik	0	NA	NA	NA	NA	NA
1700080N15Rik	0	NA	NA	NA	NA	NA
1700080O16Rik	0.315077	-3.10256	4.85905	-0.63851	0.523142	NA
1700081H04Rik	0	NA	NA	NA	NA	NA
1700083H02Rik	0	NA	NA	NA	NA	NA
1700084D21Rik	0.110872	1.43864	4.98009	0.288878	0.772675	NA
1700084E18Rik	6.39409	-0.238988	1.04877	-0.227873	0.819745	NA
1700084F23Rik	0	NA	NA	NA	NA	NA
1700084J12Rik	1.56383	1.77976	2.61733	0.67999	0.496511	NA
1700084M14Rik	0	NA	NA	NA	NA	NA
1700085C21Rik	0	NA	NA	NA	NA	NA
1700086L19Rik	2.59761	-0.604452	1.66254	-0.363571	0.716178	NA
1700086O06Rik	68.4857	0.00875791	0.353327	0.024787	0.980225	0.993359
1700088E04Rik	36.8861	0.370922	0.435425	0.85186	0.394292	0.673813
1700091H14Rik	0	NA	NA	NA	NA	NA
1700092C02Rik	0	NA	NA	NA	NA	NA
1700092C10Rik	0.123783	0	4.99758	0	1	NA
1700092E19Rik	0	NA	NA	NA	NA	NA
1700092K14Rik	0.123783	0	4.99758	0	1	NA
1700092M07Rik	7.60213	-1.18399	1.1726	-1.00971	0.312635	NA
1700093K21Rik	1.4015	-0.663211	2.48761	-0.266605	0.789773	NA
1700094D03Rik	141.802	-0.139646	0.271506	-0.514338	0.607015	0.818941
1700094J05Rik	0	NA	NA	NA	NA	NA
1700094M24Rik	0	NA	NA	NA	NA	NA
1700095A21Rik	0.097862	-1.51612	4.99038	-0.303808	0.761274	NA
1700095B10Rik	0.145431	0	4.99758	0	1	NA
1700095J12Rik	0	NA	NA	NA	NA	NA
1700096J18Rik	0	NA	NA	NA	NA	NA
1700096K18Rik	89.4275	-0.282986	0.322272	-0.878098	0.379891	0.661565
1700096P03Rik	0	NA	NA	NA	NA	NA
1700097N02Rik	62.6762	0	2.07597	0	1	1
1700099I09Rik	0	NA	NA	NA	NA	NA
1700100I10Rik	0.0899492	1.28606	4.99	0.257727	0.796618	NA
1700100L14Rik	0	NA	NA	NA	NA	NA
1700101I11Rik	1.59779	-0.117951	2.16473	-0.0544878	0.956547	NA
1700101O22Rik	0	NA	NA	NA	NA	NA
1700102H20Rik	7.78623	0.488693	0.914949	0.534121	0.593258	NA
1700102P08Rik	15.6919	-0.874305	0.832064	-1.05077	0.293366	0.57846
1700104L18Rik	0.184241	0	4.99758	0	1	NA
1700105P06Rik	1.70117	-1.2601	2.05032	-0.614589	0.538826	NA
1700108F19Rik	10.4283	0.870775	1.18209	0.736642	0.46134	0.724886
1700108J01Rik	0	NA	NA	NA	NA	NA
1700109G14Rik	0.583468	-1.03245	3.94373	-0.261796	0.793479	NA
1700109G15Rik	0	NA	NA	NA	NA	NA
1700109H08Rik	18.8075	-0.528965	0.701282	-0.754283	0.450679	0.717964
1700109I08Rik	0	NA	NA	NA	NA	NA
1700109K24Rik	0	NA	NA	NA	NA	NA
1700110C19Rik	0.822396	-2.65159	3.39745	-0.780463	0.435118	NA
1700110I01Rik	0	NA	NA	NA	NA	NA
1700110I07Rik	0	NA	NA	NA	NA	NA
1700110K17Rik	1.41033	0.26429	2.17253	0.121651	0.903175	NA
1700111N16Rik	0.571224	-1.65475	3.86699	-0.427918	0.66871	NA
1700112E06Rik	6.80031	0.268605	1.09123	0.246148	0.805568	NA
1700112H15Rik	0.123783	0	4.99758	0	1	NA
1700112J05Rik	0	NA	NA	NA	NA	NA
1700112J16Rik	5.09475	-0.329485	1.2429	-0.265094	0.790937	NA
1700113A16Rik	38.5833	0.0393348	0.455453	0.086364	0.931177	0.973971
1700113B09Rik	0.893451	-2.44228	3.47136	-0.703551	0.481712	NA
1700113H08Rik	0.306596	-0.874887	4.88494	-0.179099	0.85786	NA
1700116B05Rik	0.110872	1.43864	4.98009	0.288878	0.772675	NA
1700119H24Rik	0	NA	NA	NA	NA	NA
1700120C14Rik	2.13317	-0.180854	1.98496	-0.0911121	0.927404	NA
1700120E14Rik	0	NA	NA	NA	NA	NA
1700120G07Rik	0	NA	NA	NA	NA	NA
1700120K04Rik	0.110872	1.43864	4.98009	0.288878	0.772675	NA
1700121L16Rik	0	NA	NA	NA	NA	NA
1700121N20Rik	0.152365	0	4.99758	0	1	NA
1700122C19Rik	0	NA	NA	NA	NA	NA
1700122O11Rik	0.851548	0.685081	3.56572	0.19213	0.847641	NA
1700123I01Rik	13.6015	-0.114487	1.59618	-0.0717255	0.94282	0.978679
1700123J17Rik	0	NA	NA	NA	NA	NA
1700123K08Rik	0.209303	-0.260891	4.97332	-0.0524581	0.958164	NA
1700123L14Rik	0	NA	NA	NA	NA	NA
1700123M08Rik	15.1107	0.61878	0.715799	0.864461	0.387335	0.667667
1700123O12Rik	0	NA	NA	NA	NA	NA
1700123O20Rik	959.944	-0.0705435	0.158083	-0.446242	0.655422	0.847142
1700123O21Rik	0	NA	NA	NA	NA	NA
1700124L16Rik	7.11649	0.132584	1.10896	0.119558	0.904834	NA
1700125G02Rik	0	NA	NA	NA	NA	NA
1700125G22Rik	1.29675	0.699402	2.77376	0.252149	0.800926	NA
1700125H03Rik	0.097862	-1.51612	4.99038	-0.303808	0.761274	NA
1700125H20Rik	1.60231	-1.23287	2.69231	-0.457922	0.647009	NA
1700126H18Rik	0	NA	NA	NA	NA	NA
1700128A07Rik	0	NA	NA	NA	NA	NA
1700128F08Rik	0	NA	NA	NA	NA	NA
1700129C05Rik	0	NA	NA	NA	NA	NA
1810006J02Rik	0	NA	NA	NA	NA	NA
1810007C17Rik	0	NA	NA	NA	NA	NA
1810007D17Rik	0	NA	NA	NA	NA	NA
1810008I18Rik	0	NA	NA	NA	NA	NA
1810009A15Rik	2.83989	-0.0310726	1.65355	-0.0187915	0.985007	NA
1810009J06Rik	0	NA	NA	NA	NA	NA
1810010D01Rik	7.79845	-1.81384	1.06928	-1.69631	0.0898264	NA
1810010H24Rik	48.2738	0.0243512	0.404563	0.0601914	0.952003	0.982679
1810011H11Rik	0.110872	1.43864	4.98009	0.288878	0.772675	NA
1810011O10Rik	93.4569	-0.665861	0.331193	-2.01049	0.0443794	0.178742
1810012K16Rik	3.61022	0.00433077	1.39093	0.00311357	0.997516	NA
1810013A23Rik	0	NA	NA	NA	NA	NA
1810013L24Rik	1675.25	-0.0780546	0.137958	-0.565784	0.571541	0.797615
1810014B01Rik	89.3647	0.0563073	0.312785	0.180019	0.857138	0.945571
1810018F18Rik	0	NA	NA	NA	NA	NA
1810019D21Rik	74.9571	0.532663	0.36854	1.44534	0.148364	0.392552
1810020O05Rik	8.42802	-0.361012	0.957985	-0.376845	0.706289	NA
1810021B22Rik	9.63572	0.0939479	0.852279	0.110231	0.912226	NA
1810022K09Rik	0.303594	-1.66096	4.98092	-0.333464	0.738784	NA
1810024B03Rik	4.16485	-0.0296633	1.55921	-0.0190245	0.984822	NA
1810026B05Rik	447.593	-0.333651	0.165559	-2.0153	0.0438729	0.177021
1810026J23Rik	1267.85	0.0935353	0.121234	0.771528	0.440394	0.709407
1810030O07Rik	987.674	0.131835	0.134163	0.982649	0.32578	0.610292
1810032O08Rik	781.556	-0.363222	0.165834	-2.19028	0.0285041	0.130945
1810034E14Rik	8.0712	-0.721246	0.948055	-0.760763	0.446798	NA
1810037I17Rik	1390.47	-0.223611	0.194039	-1.1524	0.249157	0.530136
1810041H14Rik	1.60418	0.745559	2.43308	0.306426	0.75928	NA
1810041L15Rik	0	NA	NA	NA	NA	NA
1810043G02Rik	240.589	-0.269287	0.204354	-1.31775	0.187588	0.451098
1810043H04Rik	214.744	-0.0376892	0.261308	-0.144233	0.885317	0.955788
1810044D09Rik	37.5188	0.215098	0.473196	0.454565	0.649422	0.843621
1810046K07Rik	0.295113	1.43865	4.98009	0.288881	0.772673	NA
1810053B23Rik	0.119353	-1.66094	4.98092	-0.333461	0.738787	NA
1810055G02Rik	0	NA	NA	NA	NA	NA
1810058I24Rik	1271.89	-0.0187397	0.153069	-0.122426	0.902561	0.962102
1810062G17Rik	5.13194	-1.32617	1.32856	-0.998202	0.318181	NA
1810062O18Rik	3.75233	0.93316	1.34716	0.692689	0.488505	NA
1810063I02Rik	0.824806	0	4.00898	0	1	NA
1810064F22Rik	1.69768	-0.397935	2.52229	-0.157767	0.87464	NA
1810065E05Rik	0.443958	0.797528	4.25926	0.187246	0.851468	NA
2010001A14Rik	40.6734	-0.0905112	0.437228	-0.207011	0.836001	0.935563
2010003K11Rik	0.923437	-1.52014	3.79307	-0.400767	0.688592	NA
2010005H15Rik	2.8325	0.968289	1.56543	0.618545	0.536216	NA
2010009K17Rik	0	NA	NA	NA	NA	NA
2010010A06Rik	2.38856	0.191125	1.88056	0.101632	0.919049	NA
2010016I18Rik	0.208734	0.0365117	4.97287	0.00734218	0.994142	NA
2010106C02Rik	0	NA	NA	NA	NA	NA
2010106E10Rik	0	NA	NA	NA	NA	NA
2010107E04Rik	1673.42	-0.53956	0.178656	-3.02011	0.00252687	0.0213401
2010107G12Rik	18.5785	0.252625	0.65238	0.387236	0.698582	0.87002
2010107G23Rik	0	NA	NA	NA	NA	NA
2010109A12Rik	1.71473	-1.14489	2.18857	-0.523123	0.600889	NA
2010109I03Rik	0.320174	0.788172	4.87534	0.161665	0.87157	NA
2010111I01Rik	376.117	0.831438	0.168189	4.94347	7.67451e-07	2.08189e-05
2010204K13Rik	561.796	-0.702402	0.228215	-3.07782	0.00208524	0.0183731
2010300C02Rik	116.214	0.668384	0.297843	2.24408	0.0248272	0.117885
2010308F09Rik	2.38554	0.181248	1.84958	0.0979939	0.921937	NA
2010310C07Rik	0.123783	0	4.99758	0	1	NA
2010315B03Rik	164.592	0.202578	0.319754	0.633544	0.526379	0.770209
2010320M18Rik	175.298	-0.145954	0.242349	-0.602248	0.547009	0.782908
2200002D01Rik	163.913	-0.881423	0.377783	-2.33315	0.0196405	0.0999746
2200002J24Rik	1.33054	0.709179	2.32272	0.305322	0.760121	NA
2210010C04Rik	0	NA	NA	NA	NA	NA
2210011C24Rik	112.762	0.387574	0.290088	1.33606	0.181531	0.442375
2210013O21Rik	407.018	0.00832758	0.192097	0.0433509	0.965422	0.988129
2210016F16Rik	675.568	-0.0269882	0.196258	-0.137514	0.890625	0.957479
2210016L21Rik	888.567	0.00479197	0.127593	0.0375567	0.970041	0.989822
2210019I11Rik	2.04891	1.506	2.05204	0.733905	0.463007	NA
2210039B01Rik	3.48103	1.48451	1.45894	1.01753	0.308903	NA
2210404E10Rik	0.802018	-1.23966	3.41395	-0.363115	0.716519	NA
2210404O09Rik	168.857	0.0532723	0.240291	0.221699	0.824548	0.930111
2210406O10Rik	7.67451	0.548583	0.917447	0.597945	0.549877	NA
2210407C18Rik	27.8452	-1.11307	0.582173	-1.91192	0.055886	0.208373
2210408F21Rik	2.41478	0.266597	1.63933	0.162625	0.870814	NA
2210408I21Rik	134.89	0.0301056	0.244163	0.123301	0.901868	0.961862
2210409D07Rik	0	NA	NA	NA	NA	NA
2210409E12Rik	662.552	-1.74256	0.316632	-5.50342	3.72503e-08	1.38944e-06
2210414B05Rik	0	NA	NA	NA	NA	NA
2210416O15Rik	1.65334	-0.045761	2.51802	-0.0181734	0.985501	NA
2210417A02Rik	6.43902	-1.6754	1.52949	-1.0954	0.273343	NA
2210418O10Rik	0	NA	NA	NA	NA	NA
2210420H20Rik	0.739832	0	4.79345	0	1	NA
2300002M23Rik	1.67783	-1.60356	2.8419	-0.564255	0.57258	NA
2300003K06Rik	0	NA	NA	NA	NA	NA
2300009A05Rik	83.4431	-0.313517	0.322531	-0.972054	0.331024	0.615905
2310001H17Rik	1.66433	4.30166	2.3634	1.82012	0.0687411	NA
2310001K24Rik	0.38702	1.43865	4.98009	0.28888	0.772673	NA
2310002D06Rik	0	NA	NA	NA	NA	NA
2310002F09Rik	7.79538	0.870155	1.05098	0.827943	0.407703	NA
2310002L09Rik	0	NA	NA	NA	NA	NA
2310003N18Rik	0	NA	NA	NA	NA	NA
2310005A03Rik	0	NA	NA	NA	NA	NA
2310005E17Rik	0.184241	0	4.99758	0	1	NA
2310007B03Rik	6.85702	1.9067	1.12988	1.68752	0.0915032	NA
2310008N11Rik	1.63508	0.615229	2.10179	0.292716	0.769739	NA
2310009A05Rik	192.362	-0.0577943	0.250659	-0.230569	0.817649	0.927672
2310009B15Rik	108.182	-0.22723	0.301233	-0.754333	0.450649	0.717964
2310010J17Rik	28.2442	0.0430233	0.507126	0.0848375	0.932391	0.974137
2310011J03Rik	565.496	-0.150789	0.177381	-0.850086	0.395277	0.674861
2310015A10Rik	211.848	0.607001	0.252979	2.39941	0.0164215	0.0885576
2310015D24Rik	0.27419	1.28605	4.99	0.257726	0.796618	NA
2310016D03Rik	0	NA	NA	NA	NA	NA
2310020H05Rik	0.097862	-1.51612	4.99038	-0.303808	0.761274	NA
2310022A10Rik	1229.52	0.171988	0.161544	1.06465	0.287035	0.571846
2310022B05Rik	1654.72	0.615129	0.133729	4.59982	4.22861e-06	9.52715e-05
2310030A07Rik	2.67735	0	2.74554	0	1	NA
2310030G06Rik	197.835	-0.132402	0.284258	-0.465782	0.641371	0.839572
2310033P09Rik	561.17	-0.154536	0.156992	-0.984356	0.32494	0.609301
2310034C09Rik	0	NA	NA	NA	NA	NA
2310034G01Rik	19.0511	0.682322	0.631383	1.08068	0.27984	0.564087
2310034O05Rik	0	NA	NA	NA	NA	NA
2310035C23Rik	1091.53	-0.0777443	0.139403	-0.557692	0.577054	0.800732
2310036O22Rik	2495.31	-0.261837	0.160943	-1.62689	0.10376	0.315837
2310039H08Rik	146.191	-0.122862	0.274867	-0.446988	0.654884	0.84697
2310039L15Rik	2.12656	-1.63891	2.23435	-0.733503	0.463252	NA
2310040G24Rik	24.9015	0.221822	0.658172	0.337027	0.736096	0.890986
2310043L19Rik	0.097862	-1.51612	4.99038	-0.303808	0.761274	NA
2310043O21Rik	0	NA	NA	NA	NA	NA
2310045n01rik-mef2b	0	NA	NA	NA	NA	NA
2310050C09Rik	0	NA	NA	NA	NA	NA
2310057J18Rik	0	NA	NA	NA	NA	NA
2310057M21Rik	0	NA	NA	NA	NA	NA
2310057N15Rik	0	NA	NA	NA	NA	NA
2310061I04Rik	658.246	0.0695385	0.144465	0.481351	0.630267	0.832995
2310061N02Rik	0	NA	NA	NA	NA	NA
2310065F04Rik	0.0899492	1.28606	4.99	0.257727	0.796618	NA
2310068J16Rik	26.7212	0.371485	0.544258	0.682553	0.494889	0.748521
2310069B03Rik	3.89655	-0.984167	1.56958	-0.627024	0.530643	NA
2310069G16Rik	1.30712	-0.115612	3.02428	-0.038228	0.969506	NA
2310075C17Rik	0	NA	NA	NA	NA	NA
2310079G19Rik	0	NA	NA	NA	NA	NA
2310081J21Rik	0	NA	NA	NA	NA	NA
2400006E01Rik	128.809	-0.242674	0.278886	-0.870155	0.384215	0.665619
2410002F23Rik	1486.01	0.0871909	0.150309	0.580078	0.561862	0.791956
2410003L11Rik	364.236	-0.600982	0.184813	-3.25184	0.0011466	0.0112384
2410004B18Rik	0	NA	NA	NA	NA	NA
2410004I01Rik	4.10978	-0.503125	1.6697	-0.301327	0.763165	NA
2410004P03Rik	17.4163	-0.113344	0.703372	-0.161144	0.87198	0.951251
2410006H16Rik	1045.57	-0.0142124	0.146534	-0.0969903	0.922734	0.970071
2410012E07Rik	2.51546	-3.04555	2.40329	-1.26724	0.205069	NA
2410015M20Rik	1148.78	-0.229993	0.141504	-1.62535	0.104089	0.316366
2410016O06Rik	766.228	0.384305	0.193587	1.98518	0.0471249	0.186335
2410017I17Rik	6.31296	-1.53973	2.32204	-0.663092	0.507272	NA
2410018L13Rik	25.5909	0.457485	0.522551	0.875484	0.381311	0.662814
2410021H03Rik	5.35716	-2.555	2.09944	-1.21699	0.223608	NA
2410089E03Rik	925.044	0.182263	0.155954	1.16869	0.242527	0.521782
2410124H12Rik	10.8008	-0.930655	0.847206	-1.0985	0.271986	0.554966
2410131K14Rik	386.997	0.0573791	0.183542	0.31262	0.754569	0.899119
2410137M14Rik	23.7382	-1.39729	1.32084	-1.05788	0.29011	0.575145
2410141K09Rik	439.485	0.57075	0.38752	1.47283	0.140797	0.380713
2500002B13Rik	179.291	0.360391	0.30395	1.18569	0.235744	0.514106
2500004C02Rik	103.026	0.362998	0.320393	1.13298	0.257224	0.539351
2510002D24Rik	374.767	-0.429317	0.201248	-2.13327	0.0329024	0.144416
2510003B16Rik	14.0825	-0.0936153	0.779231	-0.120138	0.904374	0.963104
2510009E07Rik	183.792	0.541663	0.281217	1.92614	0.0540874	0.203978
2510039O18Rik	1491.74	-0.430616	0.155468	-2.7698	0.00560905	0.0397878
2610002M06Rik	424.193	0.160646	0.155241	1.03482	0.300755	0.585996
2610005L07Rik	3.85655	-0.86447	1.54245	-0.56045	0.575172	NA
2610008E11Rik	637.568	0.255795	0.147987	1.7285	0.0838988	0.274645
2610016A17Rik	2.21466	1.4512	2.3964	0.605577	0.544796	NA
2610020C07Rik	31.6727	-0.0692908	0.49645	-0.139573	0.888998	0.956922
2610020H08Rik	212.233	-0.131903	0.22429	-0.58809	0.556472	0.788717
2610027K06Rik	10.799	1.02753	0.896038	1.14675	0.251486	0.533062
2610028E06Rik	2.65259	-1.32322	2.13763	-0.619013	0.535908	NA
2610028H24Rik	0.803121	1.36577	3.14917	0.433692	0.664512	NA
2610035D17Rik	102.527	0.692038	0.270232	2.56091	0.0104399	0.0630053
2610035F20Rik	4.1656	-1.21635	1.68725	-0.720905	0.470968	NA
2610037D02Rik	81.9206	-0.287199	0.640324	-0.448521	0.653777	0.846369
2610042L04Rik	5.70525	-0.498776	1.16396	-0.428518	0.668274	NA
2610044O15Rik8	201.944	0.229868	0.210027	1.09447	0.27375	0.556535
2610100L16Rik	50.5739	-1.05846	0.594774	-1.77959	0.0751423	0.254672
2610203C22Rik	0.592716	-1.72905	4.39416	-0.393487	0.69396	NA
2610206C17Rik	4.76661	-0.291577	1.23756	-0.235606	0.813739	NA
2610301B20Rik	471.817	0.123293	0.158197	0.779363	0.435766	0.706619
2610305D13Rik	3101.93	-0.535684	0.133943	-3.99936	6.35149e-05	0.000984848
2610306M01Rik	92.8911	0.189548	0.28266	0.670588	0.502483	0.753977
2610307P16Rik	18.8132	0.697204	0.61057	1.14189	0.2535	0.535028
2610316D01Rik	2.17449	-0.891444	2.09925	-0.424649	0.671093	NA
2610318N02Rik	11.7051	-1.10597	0.955577	-1.15738	0.247116	0.527799
2610507B11Rik	9598.44	0.0323234	0.104332	0.309813	0.756703	0.90008
2610507I01Rik	141.874	0.361871	0.264508	1.36809	0.171285	0.428387
2610524H06Rik	566.803	-0.0711587	0.163059	-0.436399	0.662548	0.85075
2610528A11Rik	7.67643	0.97472	1.0244	0.9515	0.341351	NA
2610528J11Rik	63.4041	0.999748	0.361728	2.76381	0.00571301	0.0402775
2700029M09Rik	128.426	0.306668	0.265295	1.15595	0.247702	0.528556
2700038G22Rik	244.123	-0.169606	0.215986	-0.785265	0.432298	0.703966
2700046A07Rik	2.18753	-0.633729	1.86194	-0.34036	0.733585	NA
2700046G09Rik	56.8052	0.236301	0.398777	0.592565	0.553473	0.786958
2700049A03Rik	1193.8	0.28895	0.123051	2.34821	0.0188636	0.0972738
2700054A10Rik	16.6905	1.3209	0.716208	1.8443	0.0651395	0.231707
2700060E02Rik	1924.89	-0.151206	0.127922	-1.18201	0.237202	0.515634
2700062C07Rik	367.587	0.0318541	0.171581	0.185651	0.852718	0.943421
2700069I18Rik	0.671304	0.333023	3.62069	0.0919776	0.926716	NA
2700070H01Rik	0.54268	1.43334	4.64764	0.308402	0.757776	NA
2700081O15Rik	1097.2	0.265478	0.235398	1.12778	0.259412	0.541863
2700089I24Rik	0	NA	NA	NA	NA	NA
2700094K13Rik	3177.14	-0.0994578	0.164177	-0.605797	0.544649	0.781195
2700097O09Rik	385.967	0.182103	0.195546	0.931252	0.351723	0.635287
2700099C18Rik	341.157	-0.322435	0.188096	-1.71421	0.0864901	0.280055
2810001G20Rik	150.111	-0.110733	0.25289	-0.43787	0.66148	0.850137
2810002D19Rik	131.197	0.395048	0.258138	1.53038	0.125923	0.356658
2810004N23Rik	1912.91	0.171643	0.145001	1.18374	0.236518	0.514575
2810006K23Rik	366.339	0.102455	0.177958	0.575724	0.564802	0.793412
2810013P06Rik	239.781	0.197541	0.221915	0.890165	0.373377	0.655104
2810021J22Rik	348.077	0.125843	0.171574	0.733459	0.463279	0.725958
2810025M15Rik	975.392	0.184473	0.147285	1.25249	0.21039	0.482726
2810029C07Rik	48.8084	0.339455	0.412274	0.823373	0.410296	0.687393
2810032G03Rik	6.33609	0.139251	1.07856	0.129108	0.897272	NA
2810047C21Rik1	0.699059	-3.9638	4.04194	-0.980669	0.326756	NA
2810049E08Rik	2.58123	0.157544	1.88268	0.0836807	0.93331	NA
2810403A07Rik	9.31685	-1.03995	0.89533	-1.16152	0.24543	NA
2810403D21Rik	34.4558	-0.475756	0.455764	-1.04386	0.296548	0.58173
2810404M03Rik	0	NA	NA	NA	NA	NA
2810405F15Rik	0.311693	2.96689	4.85452	0.611161	0.541093	NA
2810408A11Rik	243.909	0.100019	0.257409	0.38856	0.697602	0.869715
2810408I11Rik	109.881	-0.482359	0.338911	-1.42326	0.154661	0.401545
2810410L24Rik	85.826	0.168869	0.372502	0.453338	0.650305	0.844471
2810417H13Rik	1670.05	0.428858	0.17104	2.50735	0.0121639	0.0708003
2810428I15Rik	0	NA	NA	NA	NA	NA
2810429I04Rik	53.8679	-0.129963	0.473098	-0.274707	0.783541	0.911925
2810433D01Rik	6.58669	0.750615	1.12167	0.669193	0.503372	NA
2810442N19Rik	0.097862	-1.51612	4.99038	-0.303808	0.761274	NA
2810454H06Rik	33.0425	0.16766	0.455376	0.368178	0.71274	0.877816
2810459M11Rik	73.2755	-0.0451306	0.359733	-0.125456	0.900163	0.961502
2810468N07Rik	50.9072	-0.131785	0.389265	-0.338549	0.734949	0.890534
2810471M01Rik	0.097862	-1.51612	4.99038	-0.303808	0.761274	NA
2810474O19Rik	5796.78	0.382639	0.116411	3.28697	0.00101271	0.0102016
2900005J15Rik	9.78968	-0.419889	0.999546	-0.42008	0.674427	NA
2900009J06Rik	7.64984	-0.635719	0.979177	-0.649238	0.516185	NA
2900011O08Rik	264.937	0.388915	0.23907	1.62678	0.103784	0.315837
2900026A02Rik	0	NA	NA	NA	NA	NA
2900041M22Rik	47.9469	-1.15178	0.782505	-1.47192	0.141042	0.380917
2900052N01Rik	0.543812	-3.42089	4.84445	-0.706145	0.480098	NA
2900055J20Rik	1.49686	-1.05651	2.90906	-0.363178	0.716472	NA
2900057B20Rik	0.145431	0	4.99758	0	1	NA
2900060B14Rik	3.6474	0.185649	1.57548	0.117837	0.906197	NA
2900076A07Rik	83.7655	-0.127597	0.3801	-0.335692	0.737103	0.891616
2900079G21Rik	0.455922	-3.62969	4.83646	-0.750484	0.452964	NA
2900092C05Rik	0.097862	-1.51612	4.99038	-0.303808	0.761274	NA
2900092D14Rik	20.3746	-0.454536	0.768994	-0.591079	0.554468	0.787617
2900097C17Rik	1679.56	0.239944	0.118045	2.03264	0.0420885	0.171975
3000002C10Rik	64.2759	-0.0457895	0.362945	-0.126161	0.899604	0.961229
3010001F23Rik	5.20907	0.232986	1.17063	0.199026	0.842242	NA
3010026O09Rik	265.272	-0.0750606	0.196431	-0.382123	0.70237	0.872392
3100003L05Rik	0	NA	NA	NA	NA	NA
3110001I22Rik	175.337	-0.107321	0.235706	-0.455318	0.64888	0.8434
3110002H16Rik	801.987	-0.762533	0.195399	-3.90245	9.52258e-05	0.00140825
3110009E18Rik	94.6003	0.112921	0.327148	0.345167	0.729969	0.887902
3110009F21Rik	0.097862	-1.51612	4.99038	-0.303808	0.761274	NA
3110015C05Rik	0	NA	NA	NA	NA	NA
3110021A11Rik	4.94123	-0.301811	1.31334	-0.229804	0.818244	NA
3110035E14Rik	13.8552	-1.35362	0.855306	-1.58261	0.11351	0.334698
3110039I08Rik	138	0.0792036	0.500877	0.15813	0.874354	0.95198
3110039M20Rik	0.443226	0	4.99758	0	1	NA
3110040N11Rik	262.078	-0.223559	0.223756	-0.999118	0.317738	0.602114
3110043O21Rik	557.64	0.00323312	0.14937	0.0216451	0.982731	0.994484
3110045C21Rik	16.3594	-0.124724	0.65883	-0.189312	0.849848	0.941875
3110052M02Rik	0	NA	NA	NA	NA	NA
3110056K07Rik	81.3683	-0.0010588	0.321791	-0.00329034	0.997375	0.99958
3110062M04Rik	28.018	-0.627026	0.531741	-1.1792	0.23832	0.517232
3110070M22Rik	13.7258	0.00955944	0.695957	0.0137357	0.989041	0.996761
3110079O15Rik	0	NA	NA	NA	NA	NA
3110082I17Rik	769.183	0.118642	0.143572	0.82636	0.4086	0.685927
3110082J24Rik	0.896844	1.03819	3.17818	0.326663	0.743923	NA
3110099E03Rik	1.30221	0.00845299	2.59534	0.00325699	0.997401	NA
3200001D21Rik	0	NA	NA	NA	NA	NA
3300002I08Rik	11.8839	0.454355	0.7892	0.575716	0.564807	0.793412
3300002P13Rik	14.3832	0.27529	0.743434	0.370295	0.711163	0.876985
3300005D01Rik	1.98031	-0.671789	2.20751	-0.30432	0.760884	NA
3425401B19Rik	2.0929	-1.0578	2.44116	-0.433317	0.664785	NA
3632451O06Rik	0	NA	NA	NA	NA	NA
3632454L22Rik	1.5232	-2.14406	2.34973	-0.912471	0.361521	NA
3830403N18Rik	52.0523	-1.13046	0.5005	-2.25865	0.0239049	0.114887
3830406C13Rik	204.986	0.239606	0.208349	1.15002	0.250135	0.531398
3830408C21Rik	41.1299	0.252484	0.421762	0.59864	0.549413	0.783925
3830417A13Rik	50.5144	-0.119446	0.421393	-0.283456	0.776827	0.908655
3830432H09Rik	5.06496	-1.52447	1.17339	-1.2992	0.193874	NA
3930402G23Rik	1.18112	-1.60434	2.7061	-0.592861	0.553274	NA
4430402I18Rik	10.8796	-0.182591	0.787195	-0.231951	0.816576	0.927036
4631405J19Rik	0.346252	2.33512	4.89236	0.4773	0.633149	NA
4632404H12Rik	62.8472	0.295661	0.341185	0.86657	0.386178	0.66683
4632415L05Rik	315.436	0.334527	0.171539	1.95015	0.0511582	0.197004
4632427E13Rik	16.2507	-0.358019	0.7992	-0.447972	0.654174	0.846511
4632428C04Rik	14.9634	0.0201881	0.758471	0.0266169	0.978765	0.992288
4732416N19Rik	4.03722	0.397037	1.28369	0.309292	0.757099	NA
4732471J01Rik	17.1338	0.416893	0.67848	0.614451	0.538917	0.777959
4732490B19Rik	3.5378	0.882815	1.57119	0.561876	0.5742	NA
4732491K20Rik	41.0191	-0.719409	0.436937	-1.64648	0.0996645	0.307617
4831407H17Rik	0.187811	-0.116067	4.9828	-0.0232936	0.981416	NA
4831440E17Rik	51.4118	-0.624518	0.401111	-1.55697	0.119477	0.344649
4833411C07Rik	0.097862	-1.51612	4.99038	-0.303808	0.761274	NA
4833412C05Rik	3.5398	-2.3229	1.8824	-1.23401	0.217198	NA
4833415N18Rik	0.119353	-1.66094	4.98092	-0.333461	0.738787	NA
4833417C18Rik	39.487	0.158647	0.508923	0.311731	0.755245	0.899354
4833418N02Rik	16.0277	-0.338184	0.724478	-0.466797	0.640645	0.839177
4833419F23Rik	4.35234	0.420232	1.24658	0.337109	0.736035	NA
4833420G17Rik	1099.55	-0.0934301	0.139686	-0.668859	0.503585	0.754451
4833422C13Rik	0.554956	-1.51611	4.99038	-0.303806	0.761276	NA
4833422M21Rik	0.834266	1.29121	3.63283	0.355428	0.722269	NA
4833423E24Rik	0	NA	NA	NA	NA	NA
4833427F10Rik	0	NA	NA	NA	NA	NA
4833427G06Rik	7.02363	2.53561	1.06531	2.38017	0.0173047	NA
4833428L15Rik	1.39451	1.33877	2.17055	0.616789	0.537374	NA
4833439L19Rik	2768.8	-0.0629523	0.10418	-0.604265	0.545667	0.781829
4921501E09Rik	0	NA	NA	NA	NA	NA
4921504A21Rik	5.45235	-0.0106936	1.18403	-0.0090315	0.992794	NA
4921504E06Rik	0.152365	0	4.99758	0	1	NA
4921507P07Rik	42.6987	0.524555	0.479332	1.09435	0.273803	0.556559
4921508D12Rik	0.123783	0	4.99758	0	1	NA
4921509C19Rik	0.097862	-1.51612	4.99038	-0.303808	0.761274	NA
4921509O07Rik	0.414466	-0.108313	4.96337	-0.0218224	0.98259	NA
4921511C10Rik	0.152365	0	4.99758	0	1	NA
4921511C20Rik	0.123783	0	4.99758	0	1	NA
4921511H03Rik	0	NA	NA	NA	NA	NA
4921511I17Rik	0	NA	NA	NA	NA	NA
4921511M17Rik	0	NA	NA	NA	NA	NA
4921513I03Rik	0.217215	-2.56247	4.89236	-0.52377	0.600439	NA
4921515E04Rik	0.184241	0	4.99758	0	1	NA
4921517D22Rik	0.250226	-1.51611	4.99038	-0.303807	0.761275	NA
4921518K17Rik	0	NA	NA	NA	NA	NA
4921524J17Rik	473.252	0.0235955	0.180334	0.130844	0.895899	0.960183
4921524L21Rik	0	NA	NA	NA	NA	NA
4921525O09Rik	1.3779	-1.36759	2.24435	-0.609348	0.542294	NA
4921529L05Rik	0	NA	NA	NA	NA	NA
4921530L21Rik	0	NA	NA	NA	NA	NA
4921531C22Rik	34.8638	0.132916	0.451818	0.294179	0.768621	0.905275
4921531P14Rik	0	NA	NA	NA	NA	NA
4921533I20Rik	0.729729	1.23748	3.34506	0.369942	0.711426	NA
4921534H16Rik	0	NA	NA	NA	NA	NA
4921536K21Rik	25.6005	-0.266462	0.574194	-0.464063	0.642602	0.840332
4921539E11Rik	0.297795	0	4.99758	0	1	NA
4922502D21Rik	0	NA	NA	NA	NA	NA
4922502H24Rik	0	NA	NA	NA	NA	NA
4922502N22Rik	0.110872	1.43864	4.98009	0.288878	0.772675	NA
4930401C15Rik	0	NA	NA	NA	NA	NA
4930401O10Rik	0	NA	NA	NA	NA	NA
4930401O12Rik	0	NA	NA	NA	NA	NA
4930402F06Rik	0.145431	0	4.99758	0	1	NA
4930402F11Rik	0	NA	NA	NA	NA	NA
4930402H24Rik	702.379	-0.0634478	0.167448	-0.37891	0.704755	0.873253
4930402K13Rik	0.453455	0	4.90354	0	1	NA
4930404A05Rik	0	NA	NA	NA	NA	NA
4930404H11Rik	0.695228	0.437064	3.90652	0.111881	0.910918	NA
4930404I05Rik	0.208734	0.0365117	4.97287	0.00734218	0.994142	NA
4930404N11Rik	1.62308	0.599652	2.31	0.25959	0.79518	NA
4930405A10Rik	0	NA	NA	NA	NA	NA
4930405A21Rik	7.08009	-0.163457	1.01766	-0.16062	0.872393	NA
4930405D11Rik	1.19413	-0.97669	2.67105	-0.365658	0.714621	NA
4930405J17Rik	0	NA	NA	NA	NA	NA
4930405L22Rik	0	NA	NA	NA	NA	NA
4930405O22Rik	0.687975	-0.244528	3.65992	-0.0668125	0.946731	NA
4930406D18Rik	0	NA	NA	NA	NA	NA
4930407G08Rik	0	NA	NA	NA	NA	NA
4930407I10Rik	0	NA	NA	NA	NA	NA
4930407I19Rik	0	NA	NA	NA	NA	NA
4930412B13Rik	0	NA	NA	NA	NA	NA
4930412C18Rik	5.31904	0.228093	1.17704	0.193786	0.846344	NA
4930412O13Rik	19.4236	0.168384	0.69428	0.242531	0.808369	0.923252
4930413E15Rik	0	NA	NA	NA	NA	NA
4930413F20Rik	0.311693	2.96689	4.85452	0.611161	0.541093	NA
4930413G21Rik	1.52067	-1.06072	2.21912	-0.477993	0.632655	NA
4930413M19Rik	0	NA	NA	NA	NA	NA
4930414N06Rik	0	NA	NA	NA	NA	NA
4930415F15Rik	0	NA	NA	NA	NA	NA
4930415L06Rik	0	NA	NA	NA	NA	NA
4930415O20Rik	2.45086	2.32927	2.35234	0.990194	0.322079	NA
4930417O13Rik	0	NA	NA	NA	NA	NA
4930417O22Rik	0.414645	0	4.99758	0	1	NA
4930419G24Rik	0	NA	NA	NA	NA	NA
4930423M02Rik	0	NA	NA	NA	NA	NA
4930425K10Rik	0	NA	NA	NA	NA	NA
4930425L21Rik	0.123783	0	4.99758	0	1	NA
4930425O10Rik	1.00575	0	3.41903	0	1	NA
4930426D05Rik	17.3613	0.96515	0.840345	1.14852	0.250755	0.532239
4930426L09Rik	2.01825	-0.319836	1.75212	-0.182542	0.855157	NA
4930427A07Rik	772.411	-0.057686	0.149852	-0.384953	0.700272	0.870591
4930428D20Rik	0	NA	NA	NA	NA	NA
4930428E07Rik	0	NA	NA	NA	NA	NA
4930428G15Rik	0.29077	2.87281	4.85918	0.591213	0.554378	NA
4930428O21Rik	0.152365	0	4.99758	0	1	NA
4930429B21Rik	76.3597	0.549256	0.342057	1.60574	0.108331	0.324775
4930429D17Rik	0	NA	NA	NA	NA	NA
4930429F11Rik	0	NA	NA	NA	NA	NA
4930429F24Rik	2.91811	0.662436	1.5796	0.419369	0.674946	NA
4930430A15Rik	0	NA	NA	NA	NA	NA
4930430F08Rik	404.959	-0.373633	0.158444	-2.35814	0.0183666	0.0957773
4930430F21Rik	0	NA	NA	NA	NA	NA
4930430J02Rik	0.715832	-0.11359	2.93774	-0.0386657	0.969157	NA
4930431F12Rik	0.328087	-1.00984	4.87449	-0.207168	0.835878	NA
4930431P03Rik	0.184241	0	4.99758	0	1	NA
4930432J09Rik	0.798756	1.42605	3.22197	0.442601	0.658054	NA
4930432K21Rik	54.3918	0.403553	0.405271	0.995763	0.319365	0.603665
4930432M17Rik	0	NA	NA	NA	NA	NA
4930433B08Rik	0	NA	NA	NA	NA	NA
4930433I11Rik	0	NA	NA	NA	NA	NA
4930433N12Rik	6.21693	0.198181	1.21359	0.163301	0.870281	NA
4930434J06Rik	0	NA	NA	NA	NA	NA
4930435E12Rik	0	NA	NA	NA	NA	NA
4930438E09Rik	0	NA	NA	NA	NA	NA
4930440C22Rik	0	NA	NA	NA	NA	NA
4930440I19Rik	0	NA	NA	NA	NA	NA
4930441H08Rik	0	NA	NA	NA	NA	NA
4930441J16Rik	0	NA	NA	NA	NA	NA
4930442J19Rik	0	NA	NA	NA	NA	NA
4930442L01Rik	0	NA	NA	NA	NA	NA
4930443O20Rik	0.152365	0	4.99758	0	1	NA
4930444F02Rik	0.814553	-0.0179464	3.14782	-0.00570122	0.995451	NA
4930444G20Rik	0	NA	NA	NA	NA	NA
4930444M15Rik	75.1897	-1.22248	0.620983	-1.96861	0.0489975	0.191169
4930444P10Rik	6.34003	-1.15302	1.14108	-1.01046	0.312273	NA
4930445N18Rik	0.485451	-0.246642	4.25046	-0.0580272	0.953727	NA
4930447A16Rik	0	NA	NA	NA	NA	NA
4930447C04Rik	582.547	-0.102242	0.29755	-0.343614	0.731137	0.88856
4930447F24Rik	2.34793	1.52743	2.24573	0.680152	0.496408	NA
4930447J18Rik	0	NA	NA	NA	NA	NA
4930447K03Rik	0.543404	1.28874	4.11337	0.313304	0.75405	NA
4930447M23Rik	0	NA	NA	NA	NA	NA
4930447N08Rik	0	NA	NA	NA	NA	NA
4930448C13Rik	0	NA	NA	NA	NA	NA
4930448F12Rik	0	NA	NA	NA	NA	NA
4930448H16Rik	0	NA	NA	NA	NA	NA
4930448I06Rik	0	NA	NA	NA	NA	NA
4930448I18Rik	0	NA	NA	NA	NA	NA
4930448K20Rik	1.10776	-1.15941	2.81872	-0.411326	0.680833	NA
4930449E01Rik	0.152365	0	4.99758	0	1	NA
4930449E18Rik	0	NA	NA	NA	NA	NA
4930449I24Rik	0	NA	NA	NA	NA	NA
4930451G09Rik	26.2393	0.29403	0.506907	0.580047	0.561883	0.791956
4930451I11Rik	0.145431	0	4.99758	0	1	NA
4930452A19Rik	0.110872	1.43864	4.98009	0.288878	0.772675	NA
4930452B06Rik	403.7	-0.0635343	0.180446	-0.352096	0.724766	0.884683
4930452G13Rik	0.0899492	1.28606	4.99	0.257727	0.796618	NA
4930452N14Rik	0	NA	NA	NA	NA	NA
4930453H23Rik	3.65681	0.333803	1.70918	0.1953	0.845158	NA
4930453L07Rik	0.247567	0	4.99758	0	1	NA
4930453N24Rik	1010.21	-0.0337723	0.150927	-0.223765	0.82294	0.929301
4930455B14Rik	0.825575	0	4.42359	0	1	NA
4930455C13Rik	0.145431	0	4.99758	0	1	NA
4930455D15Rik	0.554261	1.65144	4.49687	0.367242	0.713439	NA
4930455F16Rik	0	NA	NA	NA	NA	NA
4930455G09Rik	29.334	-1.76654	0.509149	-3.4696	0.000521233	0.00593649
4930455H04Rik	0	NA	NA	NA	NA	NA
4930455J16Rik	0	NA	NA	NA	NA	NA
4930456L15Rik	0	NA	NA	NA	NA	NA
4930459C07Rik	0.209303	-0.260891	4.97332	-0.0524581	0.958164	NA
4930459L07Rik	0	NA	NA	NA	NA	NA
4930461G14Rik	70.4158	0.138902	0.933097	0.148861	0.881663	0.953833
4930463O16Rik	0	NA	NA	NA	NA	NA
4930465K10Rik	2.33484	-0.738479	1.65541	-0.446101	0.655525	NA
4930465M20Rik	0	NA	NA	NA	NA	NA
4930467D21Rik	4.91014	-0.724004	1.56805	-0.461724	0.644279	NA
4930467E23Rik	0.097862	-1.51612	4.99038	-0.303808	0.761274	NA
4930467K11Rik	3.34459	-1.73634	1.58928	-1.09253	0.274599	NA
4930469G21Rik	0.669146	0	4.27314	0	1	NA
4930470H14Rik	0	NA	NA	NA	NA	NA
4930470O06Rik	0	NA	NA	NA	NA	NA
4930470P17Rik	0	NA	NA	NA	NA	NA
4930471C04Rik	0.195724	-2.42752	4.90277	-0.495132	0.620507	NA
4930471G03Rik	0	NA	NA	NA	NA	NA
4930471M09Rik	0.945135	-0.777555	2.94549	-0.263981	0.791794	NA
4930473A02Rik	1.60875	-0.203486	2.2686	-0.0896967	0.928528	NA
4930473O22Rik	0	NA	NA	NA	NA	NA
4930474G06Rik	0	NA	NA	NA	NA	NA
4930474H20Rik	0	NA	NA	NA	NA	NA
4930474M22Rik	0	NA	NA	NA	NA	NA
4930474N05Rik	0	NA	NA	NA	NA	NA
4930474N09Rik	0.213733	1.28606	4.99	0.257727	0.796618	NA
4930477N07Rik	1.26535	1.39636	3.25292	0.429265	0.66773	NA
4930478L05Rik	0.123783	0	4.99758	0	1	NA
4930478P22Rik	0.152365	0	4.99758	0	1	NA
4930479D17Rik	2.80226	-0.115178	2.45467	-0.0469219	0.962575	NA
4930480E11Rik	0	NA	NA	NA	NA	NA
4930480G23Rik	0.399931	0	4.99758	0	1	NA
4930480K15Rik	0.110872	1.43864	4.98009	0.288878	0.772675	NA
4930480K23Rik	115.766	0.623392	0.287582	2.1677	0.0301816	0.136274
4930480M12Rik	0	NA	NA	NA	NA	NA
4930481A15Rik	14.9011	1.14135	0.697851	1.63552	0.101941	0.312168
4930482G09Rik	0	NA	NA	NA	NA	NA
4930483J18Rik	1.86127	-0.883959	1.94491	-0.454498	0.64947	NA
4930483K19Rik	0	NA	NA	NA	NA	NA
4930483O08Rik	0	NA	NA	NA	NA	NA
4930484H19Rik	0	NA	NA	NA	NA	NA
4930486F22Rik	0	NA	NA	NA	NA	NA
4930486I03Rik	0	NA	NA	NA	NA	NA
4930486L24Rik	21.6976	0.413374	0.792094	0.521874	0.601758	0.816269
4930487D11Rik	0	NA	NA	NA	NA	NA
4930487H11Rik	0.304729	0	4.99758	0	1	NA
4930488B22Rik	0	NA	NA	NA	NA	NA
4930488L21Rik	0	NA	NA	NA	NA	NA
4930500F04Rik	0.290861	0	4.99758	0	1	NA
4930500L23Rik	0.0899492	1.28606	4.99	0.257727	0.796618	NA
4930502A04Rik	0	NA	NA	NA	NA	NA
4930502E09Rik	1.12532	-0.631887	2.57728	-0.245176	0.80632	NA
4930502E18Rik	5.66851	-1.15513	1.49711	-0.771569	0.44037	NA
4930503B20Rik	1.08934	0.128355	2.58307	0.0496907	0.960369	NA
4930503E14Rik	0.601477	2.20174	3.89682	0.565009	0.572068	NA
4930503E24Rik	96.9688	0.100356	0.303145	0.331049	0.740608	0.892657
4930503F20Rik	0	NA	NA	NA	NA	NA
4930503H13Rik	0	NA	NA	NA	NA	NA
4930503L19Rik	577.439	-0.238428	0.163551	-1.45782	0.144891	0.387031
4930503O07Rik	0	NA	NA	NA	NA	NA
4930504C09Rik	0	NA	NA	NA	NA	NA
4930504O13Rik	0	NA	NA	NA	NA	NA
4930505A04Rik	1.24869	-2.05121	2.56782	-0.798813	0.424399	NA
4930505G20Rik	0	NA	NA	NA	NA	NA
4930505K13Rik	0	NA	NA	NA	NA	NA
4930505K14Rik	0	NA	NA	NA	NA	NA
4930506A18Rik	0.0899492	1.28606	4.99	0.257727	0.796618	NA
4930506C21Rik	0.221645	-1.51612	4.99038	-0.303808	0.761274	NA
4930507D05Rik	9.19848	-0.606909	0.932518	-0.650829	0.515157	NA
4930507D10Rik	0	NA	NA	NA	NA	NA
4930509E16Rik	28.7416	-1.10008	0.877428	-1.25375	0.209932	0.482039
4930509J09Rik	0	NA	NA	NA	NA	NA
4930509K18Rik	0	NA	NA	NA	NA	NA
4930511A02Rik	0.184241	0	4.99758	0	1	NA
4930511A08Rik	0.213733	1.28606	4.99	0.257727	0.796618	NA
4930511E03Rik	0.110872	1.43864	4.98009	0.288878	0.772675	NA
4930511M06Rik	3.45581	0.732141	1.64202	0.445877	0.655686	NA
4930512B01Rik	0.145431	0	4.99758	0	1	NA
4930512J16Rik	2.10368	-3.03316	2.72614	-1.11262	0.265872	NA
4930512M02Rik	0	NA	NA	NA	NA	NA
4930513D17Rik	0.412939	-3.49355	4.84154	-0.721577	0.470554	NA
4930513N10Rik	96.812	0.0543008	0.297384	0.182595	0.855116	0.94444
4930513O06Rik	0	NA	NA	NA	NA	NA
4930515B02Rik	0	NA	NA	NA	NA	NA
4930515G01Rik	7.46122	0.292045	0.988281	0.295508	0.767606	NA
4930515G16Rik	0	NA	NA	NA	NA	NA
4930515L03Rik	0	NA	NA	NA	NA	NA
4930515L19Rik	0	NA	NA	NA	NA	NA
4930517E11Rik	0	NA	NA	NA	NA	NA
4930517M08Rik	0	NA	NA	NA	NA	NA
4930518J21Rik	0	NA	NA	NA	NA	NA
4930518P08Rik	0	NA	NA	NA	NA	NA
4930519D14Rik	0	NA	NA	NA	NA	NA
4930519F09Rik	64.3891	-0.198219	0.389261	-0.509218	0.610599	0.821764
4930519F16Rik	2.31379	0	2.7723	0	1	NA
4930519F24Rik	0	NA	NA	NA	NA	NA
4930519G04Rik	0.110872	1.43864	4.98009	0.288878	0.772675	NA
4930519H02Rik	0	NA	NA	NA	NA	NA
4930519K11Rik	0.221744	2.46689	4.88308	0.505192	0.613424	NA
4930520O04Rik	8.23968	1.51593	1.0025	1.51214	0.130497	NA
4930520P13Rik	0	NA	NA	NA	NA	NA
4930521E06Rik	0	NA	NA	NA	NA	NA
4930522H14Rik	0	NA	NA	NA	NA	NA
4930522O17Rik	0	NA	NA	NA	NA	NA
4930523C07Rik	22.858	-0.0188586	0.641541	-0.0293958	0.976549	0.991346
4930523O13Rik	0	NA	NA	NA	NA	NA
4930524B15Rik	7.79488	-1.03022	1.22762	-0.839203	0.401355	NA
4930524B17Rik	0	NA	NA	NA	NA	NA
4930524C18Rik	0.195724	-2.42752	4.90277	-0.495132	0.620507	NA
4930524N10Rik	0	NA	NA	NA	NA	NA
4930524O05Rik	0	NA	NA	NA	NA	NA
4930524O08Rik	0	NA	NA	NA	NA	NA
4930525C09Rik	0	NA	NA	NA	NA	NA
4930525D18Rik	0.354164	0.0365117	4.97287	0.00734218	0.994142	NA
4930525G20Rik	11.2631	0.785184	0.805002	0.975381	0.329372	0.613937
4930526H09Rik	0.0899492	1.28606	4.99	0.257727	0.796618	NA
4930526I15Rik	78.0243	-0.086428	0.351491	-0.245889	0.805768	0.922177
4930526L06Rik	8.43696	-1.56716	2.20974	-0.709209	0.478195	NA
4930527F14Rik	0.900932	1.39743	3.28036	0.425998	0.670109	NA
4930527G23Rik	0	NA	NA	NA	NA	NA
4930528A17Rik	19.233	-0.340681	0.632577	-0.53856	0.590191	0.80935
4930528D03Rik	0.551317	-1.51875	4.09524	-0.370858	0.710743	NA
4930528G23Rik	0	NA	NA	NA	NA	NA
4930528H21Rik	0	NA	NA	NA	NA	NA
4930528P14Rik	0	NA	NA	NA	NA	NA
4930529C04Rik	0	NA	NA	NA	NA	NA
4930529K09Rik	0	NA	NA	NA	NA	NA
4930529L06Rik	0	NA	NA	NA	NA	NA
4930532I03Rik	0	NA	NA	NA	NA	NA
4930532M18Rik	0	NA	NA	NA	NA	NA
4930533B01Rik	0	NA	NA	NA	NA	NA
4930533N22Rik	0	NA	NA	NA	NA	NA
4930533P14Rik	0	NA	NA	NA	NA	NA
4930538K18Rik	4.63447	0.0054669	1.2643	0.00432407	0.99655	NA
4930539C22Rik	0	NA	NA	NA	NA	NA
4930539E08Rik	83.3756	-2.62624	0.386961	-6.78683	1.14621e-11	8.45675e-10
4930539J05Rik	5.80096	0.075555	1.04413	0.0723615	0.942314	NA
4930539M17Rik	0.200821	2.33512	4.89236	0.4773	0.633149	NA
4930539N22Rik	0	NA	NA	NA	NA	NA
4930540M03Rik	0.328087	-1.00984	4.87449	-0.207168	0.835878	NA
4930542C21Rik	0	NA	NA	NA	NA	NA
4930542D17Rik	0.119353	-1.66094	4.98092	-0.333461	0.738787	NA
4930543E12Rik	0.336605	0	4.99758	0	1	NA
4930543N07Rik	0	NA	NA	NA	NA	NA
4930544D05Rik	0.123783	0	4.99758	0	1	NA
4930544G11Rik	0	NA	NA	NA	NA	NA
4930544M13Rik	0	NA	NA	NA	NA	NA
4930545E07Rik	0	NA	NA	NA	NA	NA
4930545H06Rik	0	NA	NA	NA	NA	NA
4930545L23Rik	0	NA	NA	NA	NA	NA
4930546C10Rik	0	NA	NA	NA	NA	NA
4930546K05Rik	2.59279	3.27411	2.47868	1.32091	0.186532	NA
4930547E08Rik	0	NA	NA	NA	NA	NA
4930547E14Rik	0	NA	NA	NA	NA	NA
4930548G14Rik	0.179898	2.19269	4.90337	0.447181	0.654745	NA
4930548H24Rik	1.26361	-0.412014	2.24469	-0.18355	0.854366	NA
4930548J01Rik	0.238707	-2.68782	4.88351	-0.550387	0.582054	NA
4930548K13Rik	0	NA	NA	NA	NA	NA
4930549C01Rik	0.152365	0	4.99758	0	1	NA
4930549C15Rik	0	NA	NA	NA	NA	NA
4930549G23Rik	1.42904	-1.07121	2.55186	-0.419777	0.674648	NA
4930550C14Rik	17.1902	0.504424	0.717065	0.703456	0.481772	0.739817
4930550C17Rik	0.110872	1.43864	4.98009	0.288878	0.772675	NA
4930550L24Rik	8.89483	-1.00591	0.991288	-1.01475	0.310225	NA
4930552N02Rik	0	NA	NA	NA	NA	NA
4930552P12Rik	4.60534	-0.920642	1.29169	-0.712744	0.476004	NA
4930553C11Rik	0	NA	NA	NA	NA	NA
4930553E22Rik	0	NA	NA	NA	NA	NA
4930554C24Rik	0	NA	NA	NA	NA	NA
4930554G24Rik	0	NA	NA	NA	NA	NA
4930554H23Rik	0	NA	NA	NA	NA	NA
4930554I06Rik	0	NA	NA	NA	NA	NA
4930555B11Rik	0	NA	NA	NA	NA	NA
4930555B12Rik	0	NA	NA	NA	NA	NA
4930555G01Rik	0	NA	NA	NA	NA	NA
4930555G21Rik	0	NA	NA	NA	NA	NA
4930555K05Rik	0	NA	NA	NA	NA	NA
4930556C24Rik	0	NA	NA	NA	NA	NA
4930556G01Rik	0.857025	0	4.54349	0	1	NA
4930556J02Rik	0	NA	NA	NA	NA	NA
4930556M19Rik	73.4718	0.104836	0.381202	0.275015	0.783304	0.911925
4930556N09Rik	0	NA	NA	NA	NA	NA
4930556N13Rik	0	NA	NA	NA	NA	NA
4930557A04Rik	0	NA	NA	NA	NA	NA
4930557F10Rik	0	NA	NA	NA	NA	NA
4930557J02Rik	0	NA	NA	NA	NA	NA
4930557K07Rik	0	NA	NA	NA	NA	NA
4930558C23Rik	1.80278	2.95198	2.45428	1.20279	0.229059	NA
4930558F17Rik	0	NA	NA	NA	NA	NA
4930558G05Rik	0	NA	NA	NA	NA	NA
4930558J18Rik	69.7235	0.0501544	0.429021	0.116904	0.906936	0.964271
4930558K02Rik	0.623287	1.92961	3.69707	0.521928	0.60172	NA
4930559C10Rik	0	NA	NA	NA	NA	NA
4930562C15Rik	0.123783	0	4.99758	0	1	NA
4930562F07Rik	0.200821	2.33512	4.89236	0.4773	0.633149	NA
4930563D23Rik	0.152365	0	4.99758	0	1	NA
4930563E18Rik	0.285673	-1.02747	4.89505	-0.209899	0.833747	NA
4930563E22Rik	37.7648	0.239096	0.475427	0.502907	0.61503	0.824324
4930563F08Rik	0	NA	NA	NA	NA	NA
4930563H07Rik	0	NA	NA	NA	NA	NA
4930563M20Rik	0	NA	NA	NA	NA	NA
4930563M21Rik	0.119353	-1.66094	4.98092	-0.333461	0.738787	NA
4930564C03Rik	0	NA	NA	NA	NA	NA
4930564D02Rik	0.184241	0	4.99758	0	1	NA
4930565D16Rik	0	NA	NA	NA	NA	NA
4930565N06Rik	0	NA	NA	NA	NA	NA
4930567H12Rik	0	NA	NA	NA	NA	NA
4930567H17Rik	0	NA	NA	NA	NA	NA
4930567J20Rik	0	NA	NA	NA	NA	NA
4930567K12Rik	0	NA	NA	NA	NA	NA
4930567K20Rik	0	NA	NA	NA	NA	NA
4930568D16Rik	0	NA	NA	NA	NA	NA
4930568E12Rik	0	NA	NA	NA	NA	NA
4930568G15Rik	0	NA	NA	NA	NA	NA
4930570G19Rik	6.25591	-0.449108	1.13976	-0.394038	0.693553	NA
4930571K23Rik	0	NA	NA	NA	NA	NA
4930571O06Rik	0	NA	NA	NA	NA	NA
4930572K03Rik	0	NA	NA	NA	NA	NA
4930572O03Rik	0.119353	-1.66094	4.98092	-0.333461	0.738787	NA
4930572O13Rik	0	NA	NA	NA	NA	NA
4930573O16Rik	0	NA	NA	NA	NA	NA
4930577N17Rik	18.2505	-0.118568	0.633533	-0.187154	0.85154	0.942661
4930578C19Rik	0.0899492	1.28606	4.99	0.257727	0.796618	NA
4930578E11Rik	0	NA	NA	NA	NA	NA
4930578I06Rik	0	NA	NA	NA	NA	NA
4930578M01Rik	0.776631	0.629823	3.08418	0.204211	0.838189	NA
4930578N18Rik	0	NA	NA	NA	NA	NA
4930579F01Rik	0.311693	2.96689	4.85452	0.611161	0.541093	NA
4930579G18Rik	4.94991	0.0197153	1.29386	0.0152376	0.987843	NA
4930579G24Rik	525.472	-0.141208	0.205092	-0.688509	0.491132	0.745358
4930579H20Rik	0	NA	NA	NA	NA	NA
4930579J19Rik	0	NA	NA	NA	NA	NA
4930579K19Rik	12.9708	0.0286156	0.784141	0.0364929	0.970889	0.990135
4930579P08Rik	0.276148	0	4.99758	0	1	NA
4930581F22Rik	14.9857	-0.0313988	0.680541	-0.046138	0.9632	0.987305
4930583K01Rik	0.379965	-2.42751	4.90277	-0.495131	0.620507	NA
4930583P06Rik	0	NA	NA	NA	NA	NA
4930584F24Rik	0.119353	-1.66094	4.98092	-0.333461	0.738787	NA
4930586N03Rik	0	NA	NA	NA	NA	NA
4930587E11Rik	0	NA	NA	NA	NA	NA
4930590J08Rik	3.55443	0.377165	1.36628	0.276052	0.782508	NA
4930590L20Rik	0.110872	1.43864	4.98009	0.288878	0.772675	NA
4930591A17Rik	3.93187	0	2.47663	0	1	NA
4930591E09Rik	0	NA	NA	NA	NA	NA
4930592A05Rik	0	NA	NA	NA	NA	NA
4930592I03Rik	0	NA	NA	NA	NA	NA
4930593A02Rik	0.410215	-1.66094	4.98092	-0.333461	0.738787	NA
4930593C16Rik	0.110872	1.43864	4.98009	0.288878	0.772675	NA
4930594C11Rik	37.3105	-0.0537494	0.589876	-0.0911198	0.927397	0.972518
4930594O21Rik	0	NA	NA	NA	NA	NA
4930595D18Rik	0	NA	NA	NA	NA	NA
4930595M18Rik	0.184241	0	4.99758	0	1	NA
4930596D02Rik	0	NA	NA	NA	NA	NA
4930596I21Rik	0.634401	0	4.35439	0	1	NA
4930597A21Rik	0.0899492	1.28606	4.99	0.257727	0.796618	NA
4930597G03Rik	0	NA	NA	NA	NA	NA
4930598F16Rik	0.45016	0	4.99758	0	1	NA
4930599N23Rik	1.07839	0.182597	2.52422	0.0723378	0.942333	NA
4931402G19Rik	0	NA	NA	NA	NA	NA
4931403E22Rik	0.208734	0.0365117	4.97287	0.00734218	0.994142	NA
4931403G20Rik	0	NA	NA	NA	NA	NA
4931406B18Rik	0	NA	NA	NA	NA	NA
4931406C07Rik	17.1651	0.0104706	0.782665	0.0133782	0.989326	0.996891
4931406H21Rik	1.04227	-1.05514	2.58296	-0.408502	0.682905	NA
4931406P16Rik	2499.74	-0.0890586	0.15077	-0.590691	0.554727	0.787617
4931408C20Rik	0	NA	NA	NA	NA	NA
4931408D14Rik	1.40463	-0.912585	2.23851	-0.407676	0.683512	NA
4931409K22Rik	3.87193	-2.05295	1.98673	-1.03333	0.301448	NA
4931414P19Rik	294.874	0.518365	0.183737	2.82124	0.00478387	0.0352041
4931417E11Rik	0	NA	NA	NA	NA	NA
4931419H13Rik	0	NA	NA	NA	NA	NA
4931420L22Rik	0	NA	NA	NA	NA	NA
4931423N10Rik	1.55994	0.546784	2.06431	0.264875	0.791106	NA
4931428F04Rik	492.602	0.00991018	0.224427	0.0441577	0.964779	0.987885
4931428L18Rik	0.119353	-1.66094	4.98092	-0.333461	0.738787	NA
4931429L15Rik	0.0899492	1.28606	4.99	0.257727	0.796618	NA
4931429P17Rik	0	NA	NA	NA	NA	NA
4931430N09Rik	0	NA	NA	NA	NA	NA
4931431B13Rik	0	NA	NA	NA	NA	NA
4931431C16Rik	0.187811	-0.116067	4.9828	-0.0232936	0.981416	NA
4931431F19Rik	0	NA	NA	NA	NA	NA
4931440F15Rik	2.17578	1.29817	2.89782	0.447983	0.654166	NA
4931440J10Rik	0.529477	0.301163	4.41752	0.0681746	0.945647	NA
4931440P22Rik	11.1733	0.411554	0.794367	0.51809	0.604395	0.817715
4932411E22Rik	0	NA	NA	NA	NA	NA
4932411N23Rik	0.123783	0	4.99758	0	1	NA
4932412D23Rik	0.776475	0.514523	3.07366	0.167398	0.867057	NA
4932413F04Rik	0.0899492	1.28606	4.99	0.257727	0.796618	NA
4932414J04Rik	0	NA	NA	NA	NA	NA
4932414N04Rik	0	NA	NA	NA	NA	NA
4932415M13Rik	0.119353	-1.66094	4.98092	-0.333461	0.738787	NA
4932416H05Rik	88.4779	0.0836531	0.334689	0.249942	0.802632	0.921253
4932429P05Rik	0	NA	NA	NA	NA	NA
4932435O22Rik	0	NA	NA	NA	NA	NA
4932438A13Rik	1730.29	-0.176564	0.122467	-1.44172	0.14938	0.393618
4932438H23Rik	0.622242	-2.45577	4.14096	-0.593044	0.553151	NA
4932441J04Rik	0.097862	-1.51612	4.99038	-0.303808	0.761274	NA
4932443I19Rik	0.285673	-1.02747	4.89505	-0.209899	0.833747	NA
4932702P03Rik	0.184241	0	4.99758	0	1	NA
4933400A11Rik	0.399931	0	4.99758	0	1	NA
4933400B14Rik	0	NA	NA	NA	NA	NA
4933400C23Rik	0	NA	NA	NA	NA	NA
4933400F21Rik	0	NA	NA	NA	NA	NA
4933400L20Rik	0	NA	NA	NA	NA	NA
4933401B06Rik	0	NA	NA	NA	NA	NA
4933401D09Rik	0.787993	-1.55777	3.83114	-0.406607	0.684297	NA
4933401H06Rik	0	NA	NA	NA	NA	NA
4933402C06Rik	0.0899492	1.28606	4.99	0.257727	0.796618	NA
4933402D24Rik	0.110872	1.43864	4.98009	0.288878	0.772675	NA
4933402E13Rik	87.0422	-0.731102	0.379147	-1.92828	0.0538199	0.203295
4933402J07Rik	0	NA	NA	NA	NA	NA
4933402J10Rik	0	NA	NA	NA	NA	NA
4933402J15Rik	0.184241	0	4.99758	0	1	NA
4933402N03Rik	0	NA	NA	NA	NA	NA
4933402N22Rik	0.558312	-0.612732	4.33423	-0.14137	0.887577	NA
4933402P03Rik	0	NA	NA	NA	NA	NA
4933403O08Rik	1.21028	-1.92685	2.95833	-0.651331	0.514833	NA
4933404G15Rik	0	NA	NA	NA	NA	NA
4933404K08Rik	0	NA	NA	NA	NA	NA
4933404K13Rik	0	NA	NA	NA	NA	NA
4933404O12Rik	563.737	0.143127	0.155479	0.920555	0.357283	0.64115
4933405D12Rik	2.03727	2.39891	2.08298	1.15167	0.249457	NA
4933405E24Rik	0	NA	NA	NA	NA	NA
4933405L10Rik	0	NA	NA	NA	NA	NA
4933405O20Rik	0.097862	-1.51612	4.99038	-0.303808	0.761274	NA
4933406C10Rik	5.76503	-0.221866	1.10282	-0.20118	0.840558	NA
4933406D12Rik	0	NA	NA	NA	NA	NA
4933406F09Rik	0	NA	NA	NA	NA	NA
4933406G16Rik	0.179898	2.19269	4.90337	0.447181	0.654745	NA
4933406I18Rik	0.333242	-0.116067	4.9828	-0.0232936	0.981416	NA
4933406J08Rik	13.3612	1.63116	1.18474	1.37681	0.168571	0.424283
4933406J10Rik	0	NA	NA	NA	NA	NA
4933406K04Rik	0	NA	NA	NA	NA	NA
4933406M09Rik	2.85509	0	2.60802	0	1	NA
4933407E24Rik	0.152365	0	4.99758	0	1	NA
4933407G14Rik	0.152365	0	4.99758	0	1	NA
4933407I05Rik	0	NA	NA	NA	NA	NA
4933407K13Rik	75.0779	-0.954318	0.367944	-2.59365	0.00949621	0.0587898
4933407L21Rik	0.528339	0.742329	4.75264	0.156193	0.875881	NA
4933408B17Rik	0	NA	NA	NA	NA	NA
4933408J17Rik	2.56984	0.66033	1.77236	0.372572	0.709467	NA
4933408N05Rik	0	NA	NA	NA	NA	NA
4933409G03Rik	0	NA	NA	NA	NA	NA
4933409K07Rik	0	NA	NA	NA	NA	NA
4933411E08Rik	0.838067	1.55198	3.15835	0.49139	0.623151	NA
4933411G06Rik	0	NA	NA	NA	NA	NA
4933411K16Rik	3.82098	0.95709	1.34611	0.711005	0.477081	NA
4933412E12Rik	65.8588	-0.246289	0.336989	-0.730852	0.46487	0.726944
4933412E24Rik	0	NA	NA	NA	NA	NA
4933412O06Rik	0.145431	0	4.99758	0	1	NA
4933413G19Rik	0.243293	-1.51612	4.99038	-0.303808	0.761274	NA
4933413J09Rik	0.884813	0.0034553	3.6456	0.000947799	0.999244	NA
4933413L06Rik	0	NA	NA	NA	NA	NA
4933415F23Rik	0.097862	-1.51612	4.99038	-0.303808	0.761274	NA
4933416C03Rik	7.75924	-1.82041	1.26386	-1.44036	0.149766	NA
4933416E03Rik	0	NA	NA	NA	NA	NA
4933416I08Rik	0	NA	NA	NA	NA	NA
4933416M06Rik	0	NA	NA	NA	NA	NA
4933416M07Rik	14.3632	-0.654629	0.987013	-0.663243	0.507175	0.757378
4933417A18Rik	0	NA	NA	NA	NA	NA
4933417D19Rik	2.9217	-0.667088	1.41189	-0.472478	0.636585	NA
4933417E11Rik	0.243293	-1.51612	4.99038	-0.303808	0.761274	NA
4933417G07Rik	3.73591	0.333104	1.31071	0.25414	0.799388	NA
4933417O13Rik	0.200821	2.33512	4.89236	0.4773	0.633149	NA
4933421I07Rik	0	NA	NA	NA	NA	NA
4933421O10Rik	64.6376	0.129744	0.355576	0.364884	0.715198	0.879025
4933422A05Rik	1.47177	2.58535	2.41436	1.07082	0.28425	NA
4933424G05Rik	0.836106	-0.106959	3.82825	-0.0279394	0.97771	NA
4933424G06Rik	1.15378	2.50597	2.60556	0.96178	0.33616	NA
4933425B07Rik	0.187811	-0.116067	4.9828	-0.0232936	0.981416	NA
4933425L06Rik	0	NA	NA	NA	NA	NA
4933427D06Rik	6.05148	0.117376	1.24694	0.094131	0.925005	NA
4933427D14Rik	409.453	0.13733	0.197276	0.696129	0.486348	0.742674
4933427E11Rik	3.6417	0.0478028	1.34114	0.0356435	0.971567	NA
4933427E13Rik	0	NA	NA	NA	NA	NA
4933427G17Rik	4.35884	-0.609963	1.26231	-0.483211	0.628946	NA
4933427I22Rik	0	NA	NA	NA	NA	NA
4933428C19Rik	0.119353	-1.66094	4.98092	-0.333461	0.738787	NA
4933428G20Rik	1.02389	-2.10553	3.25699	-0.646465	0.517978	NA
4933429K18Rik	0	NA	NA	NA	NA	NA
4933429O19Rik	0.119353	-1.66094	4.98092	-0.333461	0.738787	NA
4933430H16Rik	0	NA	NA	NA	NA	NA
4933430I17Rik	0	NA	NA	NA	NA	NA
4933430M04Rik	0.145431	0	4.99758	0	1	NA
4933430N04Rik	0	NA	NA	NA	NA	NA
4933431E20Rik	152.31	-0.0304164	0.319495	-0.0952016	0.924155	0.970785
4933431G14Rik	0	NA	NA	NA	NA	NA
4933432G23Rik	0.329672	0	4.99758	0	1	NA
4933432I03Rik	0.393544	-0.260911	4.97332	-0.0524622	0.95816	NA
4933432I09Rik	0.465036	1.06426	4.81045	0.221239	0.824906	NA
4933432K03Rik	0	NA	NA	NA	NA	NA
4933433F19Rik	0	NA	NA	NA	NA	NA
4933433G08Rik	0	NA	NA	NA	NA	NA
4933433G15Rik	3.19797	-0.243408	1.45833	-0.166909	0.867442	NA
4933433G19Rik	4.4564	-1.91466	1.70369	-1.12383	0.261084	NA
4933433H22Rik	0	NA	NA	NA	NA	NA
4933434E20Rik	813.032	-0.0202091	0.130345	-0.155044	0.876787	0.952277
4933436E23Rik	0.097862	-1.51612	4.99038	-0.303808	0.761274	NA
4933436H12Rik	0	NA	NA	NA	NA	NA
4933436I01Rik	0	NA	NA	NA	NA	NA
4933438B17Rik	0	NA	NA	NA	NA	NA
4933438K21Rik	0.217215	-2.56247	4.89236	-0.52377	0.600439	NA
4933439C10Rik	120.867	-0.375772	0.309476	-1.21422	0.224663	0.501983
4933439K11Rik	2.70948	1.09414	1.72587	0.633965	0.526103	NA
4933440J02Rik	0.308024	0	4.99758	0	1	NA
4933440M02Rik	0.473362	-1.13606	4.77197	-0.238069	0.811828	NA
5031410I06Rik	0	NA	NA	NA	NA	NA
5031414D18Rik	12.6679	-1.0268	0.782373	-1.31242	0.189379	0.45378
5031425E22Rik	146.946	-0.218837	0.239556	-0.913511	0.360974	0.643568
5031425F14Rik	0	NA	NA	NA	NA	NA
5031426D15Rik	1.06177	-1.3981	2.81889	-0.495975	0.619912	NA
5031434C07Rik	0.475011	2.87301	4.67282	0.614834	0.538665	NA
5031434O11Rik	8.65704	-0.499856	0.854431	-0.585017	0.558537	NA
5031439G07Rik	1087.79	-0.537712	0.146845	-3.66176	0.000250489	0.00322181
5033403F01Rik	9.96924	0.0134365	0.920467	0.0145974	0.988353	NA
5033403H07Rik	2.31133	-0.851121	2.00509	-0.42448	0.671216	NA
5033404E19Rik	4.53387	1.80063	1.66589	1.08088	0.279749	NA
5033406O09Rik	23.5841	-0.331247	0.557937	-0.5937	0.552713	0.786628
5033428I22Rik	1.29465	0.197563	2.6852	0.0735748	0.941349	NA
5330411J11Rik	9.40925	1.31549	2.19512	0.599279	0.548987	NA
5330413P13Rik	0.722669	0	4.14799	0	1	NA
5330417C22Rik	0	NA	NA	NA	NA	NA
5330434G04Rik	3.22775	-0.544101	1.60088	-0.339877	0.733949	NA
5330439B14Rik	0.097862	-1.51612	4.99038	-0.303808	0.761274	NA
5430401F13Rik	0	NA	NA	NA	NA	NA
5430402E10Rik	0	NA	NA	NA	NA	NA
5430402O13Rik	3.94969	-0.0318726	1.4181	-0.0224756	0.982069	NA
5430403N17Rik	0.324604	2.33512	4.89236	0.4773	0.633149	NA
5430405H02Rik	38.6181	0.203439	0.468353	0.43437	0.66402	0.851612
5430416N02Rik	295.939	-0.277412	0.215356	-1.28816	0.197692	0.465963
5430419D17Rik	0.152365	0	4.99758	0	1	NA
5430421F17Rik	0.110872	1.43864	4.98009	0.288878	0.772675	NA
5430421N21Rik	0	NA	NA	NA	NA	NA
5430425K12Rik	0.243293	-1.51612	4.99038	-0.303808	0.761274	NA
5430427M07Rik	0	NA	NA	NA	NA	NA
5430427O19Rik	0.097862	-1.51612	4.99038	-0.303808	0.761274	NA
5430428K19Rik	0	NA	NA	NA	NA	NA
5430431A17Rik	0.110872	1.43864	4.98009	0.288878	0.772675	NA
5430434I15Rik	0	NA	NA	NA	NA	NA
5430437J10Rik	0.119353	-1.66094	4.98092	-0.333461	0.738787	NA
5430440P10Rik	1.00749	1.13067	2.87072	0.393864	0.693682	NA
5530400C23Rik	0	NA	NA	NA	NA	NA
5530401A14Rik	0	NA	NA	NA	NA	NA
5530601H04Rik	131.685	-0.118132	0.283807	-0.416242	0.677233	0.858318
5730403I07Rik	2.20676	0.888541	2.1389	0.41542	0.677835	NA
5730405O15Rik	18.0472	-0.777022	0.685788	-1.13303	0.2572	0.539351
5730408K05Rik	129.631	-0.252929	0.274924	-0.919995	0.357575	0.64115
5730409E04Rik	186.384	-0.0790479	0.214411	-0.368675	0.71237	0.877542
5730412P04Rik	0	NA	NA	NA	NA	NA
5730416F02Rik	0.394678	1.28605	4.99	0.257725	0.796619	NA
5730420D15Rik	1.45921	0	3.05314	0	1	NA
5730422E09Rik	2.53862	-0.35797	1.60784	-0.22264	0.823816	NA
5730435O14Rik	0	NA	NA	NA	NA	NA
5730455P16Rik	698.861	0.314982	0.168836	1.86561	0.0620957	0.223785
5730460C07Rik	1.88404	-2.10167	2.12246	-0.990203	0.322075	NA
5730480H06Rik	36.9357	-0.327969	0.457753	-0.716476	0.473698	0.733061
5730488B01Rik	0.299252	0.645749	4.88639	0.132152	0.894864	NA
5730507C01Rik	163.862	0.566919	0.284157	1.99509	0.046033	0.183313
5730508B09Rik	145.879	0.0772479	0.303351	0.254649	0.798995	0.9192
5730522E02Rik	2.17602	0.171348	1.78682	0.0958957	0.923603	NA
5730559C18Rik	477.29	0.673147	0.18192	3.70024	0.000215393	0.00284675
5830411N06Rik	0.247567	0	4.99758	0	1	NA
5830416I19Rik	0	NA	NA	NA	NA	NA
5830417I10Rik	941.947	0.202543	0.127586	1.58749	0.112401	0.332741
5830418P13Rik	16.5698	0.792797	0.727191	1.09022	0.275617	0.55923
5830428M24Rik	0.097862	-1.51612	4.99038	-0.303808	0.761274	NA
5830432E09Rik	0.0899492	1.28606	4.99	0.257727	0.796618	NA
5830444B04Rik	5.43168	0.365257	1.23288	0.296262	0.76703	NA
5830454E08Rik	9.03782	-0.267864	0.9067	-0.295428	0.767667	NA
5830473C10Rik	1.79941	-0.60975	2.15081	-0.283497	0.776796	NA
5930403L14Rik	28.0663	0.898042	0.532897	1.68521	0.0919484	0.292094
5930412G12Rik	20.2569	0.207719	0.679688	0.305609	0.759902	0.901548
5930430L01Rik	27.6067	0.341725	0.517685	0.660102	0.509188	0.758361
5930438M14Rik	0.605848	-0.115701	3.59049	-0.0322243	0.974293	NA
6030407O03Rik	2.41263	-2.21505	1.95909	-1.13065	0.258201	NA
6030408B16Rik	10.3599	0.112132	0.968973	0.115722	0.907873	0.964624
6030419C18Rik	269.248	0.31296	0.192311	1.62737	0.103659	0.315775
6030440G07Rik	0.464057	2.96662	4.70444	0.630601	0.528301	NA
6030443J06Rik	29.3653	0.240986	0.604952	0.398356	0.690368	0.86577
6030458C11Rik	72.2688	0.00616852	0.412603	0.0149503	0.988072	0.996296
6030466F02Rik	0.319507	-2.42752	4.90277	-0.495132	0.620507	NA
6030468B19Rik	0	NA	NA	NA	NA	NA
6030469F06Rik	0.119353	-1.66094	4.98092	-0.333461	0.738787	NA
6030471H07Rik	0	NA	NA	NA	NA	NA
6030498E09Rik	0.097862	-1.51612	4.99038	-0.303808	0.761274	NA
6230400D17Rik	10.8816	-0.898398	0.881296	-1.01941	0.30801	0.593052
6230416C02Rik	0	NA	NA	NA	NA	NA
6330403A02Rik	9.54845	-0.304845	0.935407	-0.325895	0.744503	NA
6330403K07Rik	174.331	0.223996	0.274658	0.815544	0.414761	0.69108
6330407A03Rik	0	NA	NA	NA	NA	NA
6330408A02Rik	156.228	0.146767	0.253608	0.578719	0.562779	0.792344
6330409D20Rik	1.64489	-1.48945	2.17955	-0.683376	0.494369	NA
6330410L21Rik	43.2803	0.381667	0.941801	0.405252	0.685292	0.862509
6330415B21Rik	0.0899492	1.28606	4.99	0.257727	0.796618	NA
6330415G19Rik	11.4911	0.213426	0.813884	0.262231	0.793143	0.916563
6330416G13Rik	0.500453	-2.42751	4.90277	-0.495131	0.620507	NA
6330418K02Rik	34.0305	0.0432067	0.4816	0.0897148	0.928514	0.972829
6330549D23Rik	116.465	0.46007	0.274964	1.6732	0.0942874	0.296587
6430411K18Rik	0.110872	1.43864	4.98009	0.288878	0.772675	NA
6430503K07Rik	0.336569	-3.19189	4.85463	-0.657494	0.510864	NA
6430531B16Rik	0	NA	NA	NA	NA	NA
6430548M08Rik	65.9569	-0.495166	0.327787	-1.51063	0.130882	0.364548
6430550D23Rik	18.2094	-0.874252	0.746979	-1.17038	0.241847	0.521689
6430562O15Rik	0.630312	0.00121214	3.5851	0.000338107	0.99973	NA
6430571L13Rik	21.6646	-0.635021	0.577321	-1.09994	0.271356	0.554102
6430573F11Rik	52.5436	0.119652	0.411379	0.290855	0.771162	0.906646
6430584L05Rik	0.0899492	1.28606	4.99	0.257727	0.796618	NA
6430706D22Rik	0	NA	NA	NA	NA	NA
6430710C18Rik	0.777264	1.55103	3.72496	0.416388	0.677126	NA
6530402F18Rik	49.7261	-0.134162	0.535008	-0.250766	0.801995	0.920982
6530403H02Rik	0.824528	2.20721	3.53093	0.625109	0.531899	NA
6530411M01Rik	3.09377	-0.46947	1.59137	-0.29501	0.767986	NA
6720468P15Rik	0.959124	-0.661215	2.69414	-0.245427	0.806126	NA
6720483E21Rik	4.65272	-0.791154	1.3123	-0.602874	0.546593	NA
6720489N17Rik	196.914	0.0798313	0.212698	0.375328	0.707417	0.874723
6820408C15Rik	15.8093	0.143391	0.681459	0.210418	0.833342	0.934222
6820431F20Rik	62.3321	0.204915	0.417796	0.490467	0.623803	0.829267
7420426K07Rik	0.622242	-2.45577	4.14096	-0.593044	0.553151	NA
7420461P10Rik	0.23538	1.28606	4.99	0.257727	0.796618	NA
7420700N18Rik	0	NA	NA	NA	NA	NA
7420701I03Rik	0	NA	NA	NA	NA	NA
7530416G11Rik	0	NA	NA	NA	NA	NA
7630403G23Rik	0	NA	NA	NA	NA	NA
8030411F24Rik	6.11499	-0.728613	1.35083	-0.539381	0.589624	NA
8030423F21Rik	0.414466	-0.108313	4.96337	-0.0218224	0.98259	NA
8030423J24Rik	0	NA	NA	NA	NA	NA
8030442B05Rik	0	NA	NA	NA	NA	NA
8030443G20Rik	0	NA	NA	NA	NA	NA
8030451O07Rik	0.418036	-0.113396	4.22481	-0.0268405	0.978587	NA
8030455M16Rik	0	NA	NA	NA	NA	NA
8030462N17Rik	1143.31	0.193457	0.134653	1.43671	0.150801	0.395842
8430408G22Rik	67.5612	-0.33821	0.491213	-0.688519	0.491126	0.745358
8430422H06Rik	0	NA	NA	NA	NA	NA
8430423G03Rik	0.408667	1.43865	4.98009	0.28888	0.772673	NA
8430426J06Rik	0	NA	NA	NA	NA	NA
8430429K09Rik	95.4525	0.438917	0.310044	1.41566	0.156875	0.405255
8430430B14Rik	8.2794	3.63579	1.80884	2.01001	0.0444299	NA
8430431K14Rik	0.119353	-1.66094	4.98092	-0.333461	0.738787	NA
8430436N08Rik	0.208734	0.0365117	4.97287	0.00734218	0.994142	NA
8430437L04Rik	0	NA	NA	NA	NA	NA
9030025P20Rik	18.6962	-0.201729	0.641555	-0.314438	0.753188	0.898686
9030204H09Rik	0	NA	NA	NA	NA	NA
9030404E10Rik	3.30973	-0.609207	1.42067	-0.428816	0.668057	NA
9030612E09Rik	2.01935	-3.0849	2.1023	-1.46739	0.142269	NA
9030617O03Rik	150.738	0.361748	0.240524	1.504	0.132582	0.36753
9030619P08Rik	0.0899492	1.28606	4.99	0.257727	0.796618	NA
9030624G23Rik	24.1399	0.220387	0.563058	0.391412	0.695493	0.86859
9030624J02Rik	1695.29	-0.205161	0.149321	-1.37396	0.169454	0.425393
9030625G05Rik	1.77833	-2.68668	2.24588	-1.19627	0.231591	NA
9130008F23Rik	55.996	-0.944038	0.466144	-2.02521	0.0428462	0.174057
9130011E15Rik	892.613	0.10394	0.144421	0.719697	0.471712	0.732399
9130015A21Rik	0.999519	-0.115713	3.24507	-0.0356581	0.971555	NA
9130015L21Rik	0	NA	NA	NA	NA	NA
9130019O22Rik	101.726	-0.211835	0.334919	-0.632497	0.527062	0.770538
9130019P16Rik	0.110872	1.43864	4.98009	0.288878	0.772675	NA
9130023H24Rik	157.337	0.139031	0.228825	0.607588	0.543461	0.78082
9130024F11Rik	14.5528	-1.27014	0.712429	-1.78282	0.074615	0.253268
9130204L05Rik	0.119353	-1.66094	4.98092	-0.333461	0.738787	NA
9130209A04Rik	0.119353	-1.66094	4.98092	-0.333461	0.738787	NA
9130221F21Rik	0	NA	NA	NA	NA	NA
9130221H12Rik	156.729	-0.0778242	0.237283	-0.32798	0.742927	0.89365
9130227L01Rik	0.844903	-3.4286	3.49669	-0.980528	0.326825	NA
9130230L23Rik	8.34457	-0.484736	1.00221	-0.483666	0.628623	NA
9130401M01Rik	1159.74	-0.0944473	0.157329	-0.600316	0.548296	0.783356
9130409I23Rik	0.478046	3.05585	4.85038	0.630023	0.52868	NA
9130409J20Rik	0.452026	-0.875557	4.85208	-0.18045	0.856799	NA
9230009I02Rik	0	NA	NA	NA	NA	NA
9230102K24Rik	0	NA	NA	NA	NA	NA
9230102O04Rik	1.70781	1.63689	2.28294	0.717007	0.47337	NA
9230104L09Rik	1.87806	0.847273	2.13927	0.396056	0.692063	NA
9230105E05Rik	0.979387	0.831549	3.10434	0.267866	0.788802	NA
9230110C19Rik	0	NA	NA	NA	NA	NA
9230110F15Rik	0	NA	NA	NA	NA	NA
9230112D13Rik	0	NA	NA	NA	NA	NA
9230112J17Rik	0.295113	1.43865	4.98009	0.288881	0.772673	NA
9230114K14Rik	111.984	0.086867	0.297494	0.291996	0.77029	0.905969
9230116L04Rik	6.31489	-0.34562	0.998902	-0.346	0.729343	NA
9230116N13Rik	26.9971	-0.284615	0.564812	-0.503911	0.614324	0.824018
9230117E06Rik	0.290861	0	4.99758	0	1	NA
9330020H09Rik	41.7559	-0.137667	0.41561	-0.331242	0.740462	0.892623
9330102E08Rik	78.605	-0.0603173	0.359453	-0.167803	0.866738	0.949911
9330111N05Rik	0	NA	NA	NA	NA	NA
9330117O12Rik	0.29077	2.87281	4.85918	0.591213	0.554378	NA
9330133O14Rik	140.576	0.148674	0.239405	0.621017	0.534589	0.776419
9330136K24Rik	4.99229	0.854776	1.16414	0.734256	0.462793	NA
9330151L19Rik	103.241	-0.0275092	0.371445	-0.0740598	0.940963	0.977809
9330158H04Rik	0	NA	NA	NA	NA	NA
9330159F19Rik	159.776	-1.20477	0.445309	-2.70548	0.00682066	0.0460902
9330159M07Rik	11.9467	-0.618602	0.887816	-0.696768	0.485948	0.742674
9330162012Rik	7.84085	0.664401	0.976779	0.680195	0.496381	NA
9330162B11Rik	0	NA	NA	NA	NA	NA
9330175E14Rik	0.401544	0.790573	4.89604	0.161472	0.871722	NA
9330175M20Rik	0	NA	NA	NA	NA	NA
9330178D15Rik	0	NA	NA	NA	NA	NA
9330179D12Rik	1.08086	0.881205	2.58524	0.34086	0.733209	NA
9330182L06Rik	65.8177	-0.430798	0.379689	-1.13461	0.256539	0.538814
9330182O14Rik	0.464938	-2.42821	4.78787	-0.507158	0.612044	NA
9330188P03Rik	0	NA	NA	NA	NA	NA
9330199G10Rik	0	NA	NA	NA	NA	NA
9430007A20Rik	0	NA	NA	NA	NA	NA
9430014N10Rik	0	NA	NA	NA	NA	NA
9430015G10Rik	1251.75	-0.000409517	0.170354	-0.00240392	0.998082	1
9430016H08Rik	625.486	0.145522	0.153074	0.950661	0.341776	0.625681
9430018G01Rik	2.00513	1.35493	2.23312	0.606742	0.544022	NA
9430019J16Rik	0	NA	NA	NA	NA	NA
9430020K01Rik	544.241	-0.671267	0.190815	-3.51789	0.000434989	0.00514784
9430021M05Rik	0.285673	-1.02747	4.89505	-0.209899	0.833747	NA
9430037G07Rik	8.3173	-0.866848	0.892446	-0.971316	0.331391	NA
9430038I01Rik	234.139	-0.117181	0.222566	-0.526499	0.598541	0.81472
9430041J12Rik	1.21699	-1.06255	2.75512	-0.385664	0.699745	NA
9430060I03Rik	3.78819	1.03564	1.37148	0.755125	0.450174	NA
9430065F17Rik	11.6549	0.112039	0.771289	0.145262	0.884504	0.955559
9430069I07Rik	4.71962	1.31022	2.33693	0.560662	0.575028	NA
9430078K24Rik	1.74117	0.0108512	2.18099	0.00497536	0.99603	NA
9430083A17Rik	41.74	0.511118	0.47299	1.08061	0.27987	0.564087
9430091E24Rik	15.672	-0.388415	0.684226	-0.567671	0.570259	0.797042
9530002B09Rik	0.879056	-0.239944	3.58863	-0.0668621	0.946691	NA
9530003J23Rik	0	NA	NA	NA	NA	NA
9530014B07Rik	0	NA	NA	NA	NA	NA
9530020I12Rik	0.408667	1.43865	4.98009	0.28888	0.772673	NA
9530026F06Rik	0	NA	NA	NA	NA	NA
9530026P05Rik	4.78529	-0.484248	1.14026	-0.42468	0.67107	NA
9530027J09Rik	1.83043	-0.408037	1.80335	-0.226266	0.820994	NA
9530036O11Rik	0.943364	0.27576	2.80012	0.0984815	0.92155	NA
9530051G07Rik	7.12925	0.482554	0.99377	0.485579	0.627266	NA
9530052E02Rik	0.623385	3.9687	4.75683	0.834317	0.404102	NA
9530053A07Rik	19.4252	-0.988936	0.745741	-1.32611	0.184803	0.447193
9530059O14Rik	0.455922	-3.62969	4.83646	-0.750484	0.452964	NA
9530062K07Rik	12.3938	0.351591	0.814457	0.431688	0.665968	0.852604
9530068E07Rik	3460.97	0.0424766	0.115909	0.366466	0.714017	0.878327
9530077C05Rik	30.1678	0.3318	0.558734	0.593843	0.552617	0.786628
9530080O11Rik	2.48132	0.230105	1.70313	0.135107	0.892527	NA
9530082P21Rik	30.4197	-0.0255224	0.496594	-0.0513949	0.959011	0.985861
9530091C08Rik	1.28551	-0.0534844	2.31447	-0.0231087	0.981564	NA
9630001P10Rik	0.110872	1.43864	4.98009	0.288878	0.772675	NA
9630013A20Rik	0	NA	NA	NA	NA	NA
9630013K17Rik	1.67673	2.07485	2.0272	1.02351	0.306069	NA
9630028B13Rik	0.097862	-1.51612	4.99038	-0.303808	0.761274	NA
9630028H03Rik	0.184241	0	4.99758	0	1	NA
9630028I04Rik	2.3914	0	2.70227	0	1	NA
9830107B12Rik	0	NA	NA	NA	NA	NA
9830132P13Rik	0.179898	2.19269	4.90337	0.447181	0.654745	NA
9830147E19Rik	520.492	0.0515051	0.168889	0.304964	0.760394	0.901576
9830166K06Rik	0.507417	0.651177	4.48291	0.145258	0.884507	NA
9930012K11Rik	99.1371	0.248682	0.296245	0.839448	0.401218	0.679047
9930014A18Rik	75.3775	0.5293	0.33647	1.5731	0.115696	0.338856
9930021J03Rik	1366.24	0.206214	0.144589	1.42621	0.153808	0.400646
9930104L06Rik	0	NA	NA	NA	NA	NA
9930111H07Rik	0	NA	NA	NA	NA	NA
9930111J21Rik1	1.08174	3.26921	2.91006	1.12342	0.26126	NA
9930111J21Rik2	0.097862	-1.51612	4.99038	-0.303808	0.761274	NA
A130010J15Rik	389.902	0.0840786	0.1709	0.491974	0.622737	0.828433
A130077B15Rik	0	NA	NA	NA	NA	NA
A1bg	0	NA	NA	NA	NA	NA
A1cf	0.803284	4.33604	4.25116	1.01997	0.307745	NA
A230001M10Rik	0.796016	-1.51857	4.14099	-0.366715	0.713831	NA
A230009B12Rik	0.184241	0	4.99758	0	1	NA
A230020J21Rik	1.89234	0.668229	2.27675	0.293501	0.769139	NA
A230028O05Rik	0.891554	-0.487879	2.79756	-0.174395	0.861555	NA
A230046K03Rik	2693.76	-0.101219	0.105993	-0.954959	0.339598	0.624162
A230050P20Rik	320.586	0.568444	0.219156	2.59379	0.00949236	0.0587898
A230056J06Rik	1.98149	0.454864	1.95881	0.232215	0.816371	NA
A230056P14Rik	13.5461	-0.151961	0.720592	-0.210883	0.832978	0.934049
A230057D06Rik	2.40133	-0.0476102	1.94025	-0.0245381	0.980423	NA
A230065H16Rik	0	NA	NA	NA	NA	NA
A230070E04Rik	1.6295	-0.111967	2.09292	-0.0534982	0.957335	NA
A230072C01Rik	80.0238	0.222609	0.385634	0.577255	0.563767	0.792822
A230072E10Rik	0.625849	-0.700223	4.21975	-0.165939	0.868205	NA
A230077H06Rik	6.64399	0.6757	1.04077	0.649232	0.516188	NA
A230103J11Rik	2.62935	0.95445	1.7964	0.531313	0.595202	NA
A230108P19Rik	0.0899492	1.28606	4.99	0.257727	0.796618	NA
A2m	350.823	-1.81359	0.312568	-5.80222	6.54421e-09	2.90979e-07
A330008L17Rik	0.200821	2.33512	4.89236	0.4773	0.633149	NA
A330009N23Rik	16.7943	-0.290485	0.827332	-0.351111	0.725505	0.885334
A330015K06Rik	0.937321	-0.737482	2.6909	-0.274065	0.784035	NA
A330023F24Rik	2.56722	-0.816678	1.67826	-0.486623	0.626525	NA
A330032B11Rik	0.282103	-1.51611	4.99038	-0.303807	0.761275	NA
A330033J07Rik	0.187811	-0.116067	4.9828	-0.0232936	0.981416	NA
A330035P11Rik	41.968	0.640342	0.460059	1.39187	0.163962	0.417064
A330040F15Rik	0.328087	-1.00984	4.87449	-0.207168	0.835878	NA
A330041J22Rik	3.4997	0.675488	1.41221	0.478318	0.632424	NA
A330048O09Rik	0.873328	-3.49884	3.07236	-1.13881	0.254782	NA
A330049N07Rik	0	NA	NA	NA	NA	NA
A330069E16Rik	14.67	-1.49177	0.705413	-2.11475	0.0344514	0.14923
A330070K13Rik	0	NA	NA	NA	NA	NA
A330074K22Rik	8.82326	0.405306	0.941734	0.430383	0.666917	NA
A330076C08Rik	0	NA	NA	NA	NA	NA
A330076H08Rik	3.43111	-0.152456	1.66882	-0.0913555	0.92721	NA
A330093E20Rik	0.119353	-1.66094	4.98092	-0.333461	0.738787	NA
A330102I10Rik	0.418896	1.43865	4.98009	0.288881	0.772673	NA
A3galt2	3.20424	0.89787	1.52057	0.590485	0.554866	NA
A430005L14Rik	985.345	-0.329535	0.180268	-1.82802	0.0675463	0.237375
A430033K04Rik	229.985	0.224067	0.208743	1.07341	0.283088	0.567461
A430035B10Rik	5.46758	-0.146617	1.17429	-0.124856	0.900637	NA
A430046D13Rik	51.3637	0.139033	0.418279	0.332393	0.739592	0.892215
A430078G23Rik	0.482036	0	4.79988	0	1	NA
A430078I02Rik	1.26645	-0.309153	2.35792	-0.131113	0.895686	NA
A430085M09Rik	0	NA	NA	NA	NA	NA
A430088P11Rik	0	NA	NA	NA	NA	NA
A430089I19Rik	0.145431	0	4.99758	0	1	NA
A430090L17Rik	0.208734	0.0365117	4.97287	0.00734218	0.994142	NA
A430093F15Rik	0.097862	-1.51612	4.99038	-0.303808	0.761274	NA
A430105I19Rik	41.0299	0.0258343	0.52154	0.0495346	0.960493	0.986349
A4galt	378.723	-0.430763	0.256601	-1.67873	0.0932048	0.294761
A4gnt	0	NA	NA	NA	NA	NA
A530006G24Rik	0	NA	NA	NA	NA	NA
A530013C23Rik	0.69077	-0.00171072	3.50938	-0.000487469	0.999611	NA
A530016L24Rik	0	NA	NA	NA	NA	NA
A530032D15Rik	0.110872	1.43864	4.98009	0.288878	0.772675	NA
A530046M15Rik	0.746908	2.2054	3.64002	0.605875	0.544598	NA
A530050N04Rik	0	NA	NA	NA	NA	NA
A530053G22Rik	0	NA	NA	NA	NA	NA
A530058N18Rik	0.315077	-3.10256	4.85905	-0.63851	0.523142	NA
A530064D06Rik	0.179898	2.19269	4.90337	0.447181	0.654745	NA
A530065N20Rik	0.097862	-1.51612	4.99038	-0.303808	0.761274	NA
A530072M11Rik	5.80253	0.35499	1.14581	0.309816	0.756701	NA
A530088E08Rik	0.414645	0	4.99758	0	1	NA
A530099J19Rik	0	NA	NA	NA	NA	NA
A630001G21Rik	5.97548	0.634935	1.10224	0.576043	0.564586	NA
A630010A05Rik	0.217215	-2.56247	4.89236	-0.52377	0.600439	NA
A630012P03Rik	0	NA	NA	NA	NA	NA
A630019I02Rik	0	NA	NA	NA	NA	NA
A630020A06	11.3103	-0.182302	0.817685	-0.222949	0.823576	0.929325
A630023A22Rik	0	NA	NA	NA	NA	NA
A630023P12Rik	0.577239	0	4.49778	0	1	NA
A630033H20Rik	2.65985	0	2.65061	0	1	NA
A630066F11Rik	34.3193	0.251074	0.46537	0.539515	0.589531	0.809121
A630072M18Rik	161.942	0.0147154	0.22409	0.0656675	0.947643	0.980929
A630073D07Rik	0	NA	NA	NA	NA	NA
A630075F10Rik	1.16083	0.532901	2.48685	0.214287	0.830323	NA
A630076J17Rik	0	NA	NA	NA	NA	NA
A630077J23Rik	1.38201	0	3.47742	0	1	NA
A630089N07Rik	195.887	0.163829	0.292659	0.559796	0.575619	0.799649
A630095E13Rik	0	NA	NA	NA	NA	NA
A630095N17Rik	0.460389	0	4.86103	0	1	NA
A730004F24Rik	0	NA	NA	NA	NA	NA
A730006G06Rik	0	NA	NA	NA	NA	NA
A730008H23Rik	0	NA	NA	NA	NA	NA
A730017C20Rik	16.1657	0.817419	0.823902	0.992133	0.321133	0.604708
A730017L22Rik	32.3254	0.210702	0.486598	0.433012	0.665006	0.852152
A730018C14Rik	0	NA	NA	NA	NA	NA
A730020E08Rik	9.10293	-0.826269	0.970316	-0.851547	0.394466	NA
A730020M07Rik	1.21012	-0.472339	2.47673	-0.190711	0.848752	NA
A730036I17Rik	6.44545	0	2.31331	0	1	NA
A730043L09Rik	0	NA	NA	NA	NA	NA
A730056A06Rik	3.59321	0.0401967	1.40089	0.0286937	0.977109	NA
A730082K24Rik	0.607432	0.796433	3.90761	0.203816	0.838497	NA
A730085K08Rik	0	NA	NA	NA	NA	NA
A730090N16Rik	4.82868	1.02411	1.32103	0.775233	0.438202	NA
A830009L08Rik	0.29077	2.87281	4.85918	0.591213	0.554378	NA
A830010M20Rik	243.24	-0.22121	0.201991	-1.09515	0.273452	0.556444
A830011K09Rik	0.187811	-0.116067	4.9828	-0.0232936	0.981416	NA
A830018L16Rik	32.1259	-0.766087	0.607368	-1.26132	0.207193	0.47771
A830019L24Rik	0	NA	NA	NA	NA	NA
A830052D11Rik	6.91329	0.562491	0.993186	0.56635	0.571156	NA
A830080D01Rik	0	NA	NA	NA	NA	NA
A830082K12Rik	61.3269	0.736364	0.480572	1.53227	0.125457	0.355934
A830082N09Rik	59.5577	0.56902	0.413341	1.37664	0.168625	0.424283
A930001A20Rik	0.45896	-0.876359	4.81285	-0.182087	0.855514	NA
A930001C03Rik	47.535	0.201151	0.431811	0.465832	0.641335	0.839572
A930002C04Rik	0	NA	NA	NA	NA	NA
A930003A15Rik	0.217215	-2.56247	4.89236	-0.52377	0.600439	NA
A930003O13Rik	0	NA	NA	NA	NA	NA
A930004D18Rik	119.72	0.569987	0.283197	2.01269	0.0441472	0.17802
A930005H10Rik	98.7506	-0.228656	0.29603	-0.772407	0.439873	0.70887
A930006I01Rik	0.097862	-1.51612	4.99038	-0.303808	0.761274	NA
A930006K02Rik	11.881	-0.277717	0.770342	-0.360511	0.718465	0.881135
A930007I19Rik	9.70003	0.46062	0.955461	0.482092	0.62974	NA
A930009A15Rik	0	NA	NA	NA	NA	NA
A930011G23Rik	0.481021	-1.2867	4.73718	-0.271617	0.785917	NA
A930012L18Rik	4.1859	-0.372045	1.42255	-0.261533	0.793681	NA
A930013F10Rik	97.6885	-0.613723	0.364786	-1.68242	0.0924879	0.293323
A930015D03Rik	34.2849	-0.139414	0.465727	-0.299348	0.764674	0.904026
A930016O22Rik	2.46321	-0.861434	1.71709	-0.501682	0.615891	NA
A930017M01Rik	1.70544	1.60963	2.51556	0.63987	0.522257	NA
A930018P22Rik	1.07839	0.182597	2.52422	0.0723378	0.942333	NA
A930019D19Rik	0	NA	NA	NA	NA	NA
A930024E05Rik	101.382	0.520334	0.285874	1.82015	0.0687364	0.240031
A930031H19Rik	0	NA	NA	NA	NA	NA
A930041C12Rik	0	NA	NA	NA	NA	NA
AA387883	0.832119	2.79792	3.71643	0.752851	0.451539	NA
AA388235	68.558	0.445807	0.360059	1.23815	0.21566	0.488839
AA413626	1.98454	-1.11042	1.99977	-0.555275	0.578707	NA
AA414768	244.93	-0.533433	0.33477	-1.59343	0.111064	0.330388
AA415398	41.9394	0.0770274	0.432422	0.17813	0.858621	0.946152
AA465934	120.637	-0.102722	0.328865	-0.312354	0.754771	0.899216
AA467197	13.4543	0.531445	0.782442	0.679213	0.497003	0.749944
AA536875	0.610376	2.28216	4.17729	0.546326	0.584842	NA
AA543186	14.0112	0.606955	0.696776	0.871091	0.383705	0.665167
AA543401	6.00002	2.88922	2.01491	1.43392	0.151596	NA
AA545190	0	NA	NA	NA	NA	NA
AA619741	0	NA	NA	NA	NA	NA
AA792892	0	NA	NA	NA	NA	NA
AA986860	291.276	-0.73508	0.303796	-2.41965	0.0155354	0.0850941
AB124611	0.640406	-0.787511	3.64127	-0.216274	0.828774	NA
AF067061	5.41506	1.27893	1.2309	1.03903	0.298793	NA
AF067063	0.290861	0	4.99758	0	1	NA
AF357355	0	NA	NA	NA	NA	NA
AF357359	1.98846	1.19539	1.93057	0.61919	0.535791	NA
AF357399	20.8307	0.3921	0.689453	0.568712	0.569552	0.796827
AF357425	0	NA	NA	NA	NA	NA
AF357426	0	NA	NA	NA	NA	NA
AF366264	0	NA	NA	NA	NA	NA
AF529169	13.9599	-0.557953	0.689885	-0.808763	0.418652	0.694203
AI115009	0.507098	-0.245503	4.20377	-0.0584007	0.953429	NA
AI182371	15.0182	0.142898	0.683527	0.20906	0.834401	0.934785
AI197445	1.96323	0.142793	2.1825	0.0654263	0.947835	NA
AI314180	13.741	-0.151545	0.699492	-0.216651	0.828481	0.931338
AI314278	1.88993	-0.494906	2.10647	-0.234945	0.814251	NA
AI413582	212.376	-0.211021	0.233294	-0.904527	0.365716	0.647611
AI427809	7.68695	-1.33993	1.23796	-1.08237	0.27909	NA
AI429214	22.0852	-0.429516	0.568769	-0.755168	0.450148	0.717629
AI450353	45.2029	-0.320097	0.413429	-0.77425	0.438783	0.708377
AI463170	1.09744	0.777499	3.04334	0.255475	0.798356	NA
AI464131	396.398	0.111468	0.165021	0.675479	0.499372	0.751537
AI467606	78.689	0.750907	0.591108	1.27034	0.203964	0.473847
AI504432	14.3567	-0.00564798	0.762111	-0.00741097	0.994087	0.998385
AI506816	52.4181	0.0371129	0.459702	0.0807325	0.935655	0.975464
AI507597	0.119353	-1.66094	4.98092	-0.333461	0.738787	NA
AI593442	5.60749	-0.736328	1.32493	-0.555748	0.578383	NA
AI597479	983.031	0.196935	0.130574	1.50822	0.131497	0.365579
AI606473	0.392975	0.0365313	4.97287	0.00734612	0.994139	NA
AI607873	1.08443	0.697477	2.79361	0.249669	0.802843	NA
AI646519	0.368482	0	4.99758	0	1	NA
AI661453	1338.38	0.176332	0.227368	0.775537	0.438023	0.707877
AI662270	16.0081	-0.897768	0.741131	-1.21135	0.225762	0.50341
AI837181	858.889	0.043977	0.149245	0.294664	0.768251	0.905113
AI839979	2.2669	1.06586	1.7503	0.60896	0.542551	NA
AI846148	1076.51	-0.307783	0.14873	-2.0694	0.0385087	0.161441
AI847159	1.76903	1.37646	2.80869	0.490071	0.624084	NA
AI854703	52.6113	-0.208194	0.488999	-0.425756	0.670285	0.855326
AI987944	272.53	-0.0496422	0.197124	-0.251833	0.80117	0.920622
AK010878	285.978	-0.157867	0.215904	-0.731191	0.464663	0.726874
AU015228	3.06291	0.330371	1.46757	0.225114	0.821891	NA
AU015791	0.852467	-1.70021	3.13501	-0.542329	0.587592	NA
AU015836	493.121	-0.121219	0.223444	-0.542503	0.587472	0.807594
AU016765	0	NA	NA	NA	NA	NA
AU018091	2276.05	0.580475	0.182524	3.18027	0.0014714	0.0137494
AU019823	1055.66	-0.129128	0.131145	-0.984614	0.324814	0.609162
AU019990	3.67255	1.74307	1.65207	1.05508	0.29139	NA
AU021063	0.392998	0	4.99758	0	1	NA
AU021092	6.58084	1.53449	1.10045	1.39442	0.163192	NA
AU022252	417.704	-0.0851143	0.157177	-0.54152	0.58815	0.807916
AU022751	82.7336	0.448137	0.317435	1.41174	0.158026	0.407366
AU022754	4.68793	1.13416	1.39892	0.81074	0.417515	NA
AU022793	0	NA	NA	NA	NA	NA
AU023762	0.27419	1.28605	4.99	0.257726	0.796618	NA
AU040320	0.8456	2.40329	3.30358	0.727482	0.466931	NA
AU040972	3.34982	-1.222	1.55074	-0.788009	0.430691	NA
AU041133	106.858	-0.108809	0.292266	-0.372296	0.709672	0.876194
AV039307	2.66555	-1.22244	1.76434	-0.692857	0.4884	NA
AV051173	1.33757	0.940354	2.5124	0.374286	0.708192	NA
AV064505	0	NA	NA	NA	NA	NA
AV320801	0	NA	NA	NA	NA	NA
AW011738	11.5447	0.025321	0.767021	0.0330121	0.973665	0.990674
AW046200	2.98699	-0.406539	1.7061	-0.238285	0.81166	NA
AW112010	15.5209	-1.68269	0.739844	-2.27439	0.0229427	0.111581
AW146154	171.966	0.372142	0.2292	1.62366	0.104449	0.317025
AW209491	719.749	0.176199	0.138757	1.26984	0.204142	0.474167
AW495222	0.328087	-1.00984	4.87449	-0.207168	0.835878	NA
AW549542	21.2195	0.613879	0.666022	0.921709	0.35668	0.640479
AW549877	1867.23	0.0128556	0.132456	0.0970554	0.922682	0.970071
AW551984	131.427	0.579613	0.336151	1.72426	0.0846601	0.276329
AW554918	390.964	0.390341	0.189041	2.06485	0.0389374	0.162698
AW822252	0.929407	-2.03244	3.44913	-0.58926	0.555687	NA
AY074887	1.05687	0.917074	2.67457	0.342887	0.731683	NA
AY358078	26.0959	-0.144441	0.609618	-0.236937	0.812705	0.925537
AY512915	0.184241	0	4.99758	0	1	NA
AY512931	4.6397	-1.53763	2.39154	-0.642946	0.520259	NA
AY702102	0	NA	NA	NA	NA	NA
AY702103	0	NA	NA	NA	NA	NA
AY761184	0.217215	-2.56247	4.89236	-0.52377	0.600439	NA
AY761185	0	NA	NA	NA	NA	NA
Aaas	2471.49	-0.180926	0.163846	-1.10425	0.269486	0.552015
Aacs	721.044	-0.179835	0.146808	-1.22497	0.220588	0.496739
Aadac	2.73866	0	2.63725	0	1	NA
Aadacl2	0.423035	0.645749	4.88639	0.132152	0.894864	NA
Aadacl3	0.097862	-1.51612	4.99038	-0.303808	0.761274	NA
Aadat	6.46045	-0.328031	1.01994	-0.321619	0.747741	NA
Aaed1	242.841	0.225764	0.202065	1.11728	0.263873	0.545694
Aagab	0	NA	NA	NA	NA	NA
Aak1	1873.8	0.0957579	0.121922	0.785406	0.432215	0.703966
Aamdc	188.366	-0.195927	0.263421	-0.743777	0.457011	0.722055
Aamp	4090.21	-0.0988608	0.169207	-0.584261	0.559044	0.790444
Aanat	0.792992	-1.43091	3.87125	-0.369624	0.711662	NA
Aar2	963.124	0.198641	0.133436	1.48866	0.136576	0.374581
Aard	205.07	-0.545876	0.284469	-1.91893	0.0549934	0.205754
Aars	12193.4	-0.142831	0.114742	-1.2448	0.213207	0.485904
Aars2	10.4004	-1.04896	0.917756	-1.14296	0.253054	0.53453
Aarsd1	1372.65	0.0641954	0.149169	0.430354	0.666938	0.853081
Aasdh	507.664	0.273423	0.181541	1.50612	0.132037	0.366476
Aasdhppt	1.27518	-0.0124253	2.53545	-0.00490064	0.99609	NA
Aass	77.4896	-0.885113	0.32828	-2.69621	0.00701337	0.0470877
Aatf	1729.05	0.240724	0.165599	1.45366	0.146041	0.388417
Aatk	90.6144	0.404951	0.347621	1.16492	0.244051	0.523751
Abat	281.75	0.349693	0.236768	1.47695	0.13969	0.379094
Abca1	1913.32	0.0303295	0.176197	0.172134	0.863332	0.948366
Abca12	4.01571	1.69097	1.37261	1.23194	0.217973	NA
Abca13	13.1967	0.803756	1.07415	0.748274	0.454295	0.719881
Abca14	2.6986	-3.60877	2.22175	-1.62429	0.104313	NA
Abca15	0	NA	NA	NA	NA	NA
Abca16	0.871738	0	3.98381	0	1	NA
Abca17	4.59147	0.562289	1.20333	0.467277	0.640302	NA
Abca2	1076.01	0.0100707	0.171625	0.0586786	0.953208	0.982791
Abca3	1364.47	0.278919	0.133583	2.08798	0.0367995	0.156029
Abca4	17.9275	-0.534625	0.735301	-0.727083	0.467175	0.728513
Abca5	261.503	-0.303467	0.205836	-1.47431	0.140397	0.380176
Abca6	0.830056	0.799497	3.58925	0.222748	0.823732	NA
Abca7	0	NA	NA	NA	NA	NA
Abca8a	0.195724	-2.42752	4.90277	-0.495132	0.620507	NA
Abca8b	24.458	-0.071126	0.556148	-0.12789	0.898236	0.96077
Abca9	0.54182	-0.113485	3.4616	-0.0327839	0.973847	NA
Abcb10	1167.16	-0.0488233	0.142491	-0.342642	0.731868	0.888723
Abcb11	2.09039	-0.371265	2.07488	-0.178934	0.85799	NA
Abcb1a	316.38	-0.105296	0.201669	-0.522123	0.601585	0.816215
Abcb1b	455.122	-0.0666848	0.212763	-0.313423	0.75396	0.899114
Abcb4	21.5701	-0.378339	0.574659	-0.658372	0.510299	0.759342
Abcb5	6.07998	-0.833054	1.50895	-0.552076	0.580897	NA
Abcb6	710.774	-0.150195	0.13446	-1.11702	0.263985	0.545772
Abcb7	1841.29	0.122817	0.112189	1.09473	0.273634	0.556535
Abcb8	763.68	0.126862	0.14694	0.86336	0.38794	0.668367
Abcb9	36.3703	-0.817014	0.511514	-1.59725	0.110211	0.328505
Abcc1	1421.51	0.377323	0.156709	2.4078	0.016049	0.087052
Abcc10	2.76605	-0.927477	1.72871	-0.536513	0.591604	NA
Abcc12	1.76054	-0.785663	1.82967	-0.429402	0.667631	NA
Abcc2	33.7627	0.157532	0.449561	0.350414	0.726028	0.885719
Abcc3	31.3287	-0.225582	0.472114	-0.477812	0.632784	0.834924
Abcc4	2302.18	-0.105623	0.118188	-0.893689	0.371488	0.653128
Abcc5	2745.56	-0.456252	0.108359	-4.21057	2.54727e-05	0.000457894
Abcc6	7.85157	-0.594881	0.991821	-0.599786	0.548649	NA
Abcc8	0	NA	NA	NA	NA	NA
Abcc9	13.9154	0.737432	0.739732	0.996891	0.318817	0.603309
Abcd1	394.123	-0.492752	0.204578	-2.40863	0.0160124	0.0869447
Abcd2	0	NA	NA	NA	NA	NA
Abcd3	16.387	-0.385679	0.645304	-0.597671	0.550059	0.784347
Abcd4	468.382	-0.0783396	0.158393	-0.494591	0.620889	0.827523
Abce1	0	NA	NA	NA	NA	NA
Abcf1	5953.58	-0.226903	0.115102	-1.97133	0.0486862	0.190489
Abcf2	0.221645	-1.51612	4.99038	-0.303808	0.761274	NA
Abcf3	1395.98	-0.157815	0.115689	-1.36413	0.172526	0.43021
Abcg1	284.826	0.258428	0.194493	1.32873	0.183938	0.445835
Abcg2	94.2033	-0.285293	0.400208	-0.712861	0.475932	0.735253
Abcg3	6.61356	-0.286189	1.06939	-0.26762	0.788992	NA
Abcg4	38.8492	0.0180955	0.44583	0.0405884	0.967624	0.988607
Abcg5	1.2943	0.432703	2.63494	0.164217	0.86956	NA
Abcg8	0.119353	-1.66094	4.98092	-0.333461	0.738787	NA
Abhd1	101.86	-0.077558	0.272627	-0.284483	0.77604	0.908198
Abhd10	627.979	0.0921905	0.14447	0.63813	0.523389	0.768262
Abhd11	798.508	0.140718	0.149298	0.942529	0.345922	0.630315
Abhd11os	134.296	0.933559	0.259783	3.59361	0.000326124	0.00404358
Abhd12	0	NA	NA	NA	NA	NA
Abhd12b	0.097862	-1.51612	4.99038	-0.303808	0.761274	NA
Abhd13	1178.92	0.0560252	0.130001	0.43096	0.666498	0.853081
Abhd14a	61.5838	0.211824	0.375154	0.564632	0.572324	0.797711
Abhd14b	120.351	0.0345383	0.282997	0.122045	0.902864	0.962319
Abhd15	32.131	0.443196	0.480422	0.922514	0.356261	0.639982
Abhd16a	703.903	-0.11044	0.136847	-0.807033	0.419647	0.695339
Abhd16b	1.11567	0	3.58408	0	1	NA
Abhd17a	1229.5	-0.00872901	0.17147	-0.0509068	0.9594	0.98601
Abhd17b	1109.56	0.207701	0.143784	1.44454	0.148587	0.392762
Abhd17c	1579.69	0.342045	0.127542	2.68183	0.00732216	0.0486742
Abhd18	110.116	-0.491301	0.286851	-1.71274	0.0867603	0.280592
Abhd2	562.674	-0.148282	0.167471	-0.885418	0.375931	0.657292
Abhd3	78.44	-0.25943	0.314342	-0.825309	0.409196	0.686473
Abhd4	2696.72	0.428205	0.156094	2.74325	0.00608337	0.0422158
Abhd5	15.9843	-0.620646	0.755932	-0.821034	0.411627	0.688592
Abhd6	0	NA	NA	NA	NA	NA
Abhd8	439.139	0.132278	0.165825	0.797699	0.425045	0.69881
Abi1	0	NA	NA	NA	NA	NA
Abi2	1771.06	0.306918	0.114774	2.6741	0.0074931	0.0493706
Abi3	37.5438	-0.938999	0.767452	-1.22353	0.22113	0.49696
Abi3bp	24.72	0.354188	0.719856	0.492026	0.622701	0.828433
Abl1	3816.59	0.226834	0.105232	2.15556	0.0311179	0.139098
Abl2	2722.57	0.128482	0.109033	1.17838	0.238645	0.517434
Ablim1	15.2284	-1.02861	0.71057	-1.44759	0.147732	0.391349
Ablim2	35.8238	0.305101	0.467076	0.653216	0.513617	0.760623
Ablim3	22.2177	-0.752911	0.614851	-1.22454	0.220748	0.496849
Abo	3.52297	-1.32111	1.56549	-0.843896	0.398727	NA
Abr	38.8463	0.875263	0.486975	1.79735	0.0722807	0.247725
Abra	0	NA	NA	NA	NA	NA
Abracl	685.791	-0.760268	0.208513	-3.64615	0.000266203	0.00339466
Abt1	857.137	-0.0441583	0.156199	-0.282705	0.777403	0.908943
Abtb1	738.051	-0.111432	0.143741	-0.775229	0.438204	0.708002
Abtb2	717.451	0.696028	0.169003	4.11845	3.81432e-05	0.000653599
Acaa1a	2.13853	0.672042	1.75126	0.383747	0.701166	NA
Acaa1b	20.6508	-0.132694	0.610865	-0.217224	0.828034	0.931121
Acaa2	1066.37	0.583693	0.129637	4.50253	6.71507e-06	0.000143583
Acaca	1272.07	0.236471	0.136064	1.73794	0.0822209	0.270604
Acacb	647.707	0.16506	0.194348	0.849299	0.395715	0.675077
Acad10	309.229	0.304631	0.17266	1.76434	0.0776754	0.260756
Acad11	772.617	0.168273	0.155494	1.08218	0.279173	0.563269
Acad12	135.821	0.413794	0.254886	1.62344	0.104494	0.317025
Acad8	780.668	-0.020948	0.149671	-0.13996	0.888691	0.956922
Acad9	1399.71	-0.0119867	0.123805	-0.096819	0.92287	0.970071
Acadl	1027.69	-0.0442814	0.163364	-0.271059	0.786346	0.913379
Acadm	2078.14	-0.111951	0.143325	-0.781097	0.434746	0.705934
Acads	1480.24	-0.109673	0.153478	-0.714583	0.474867	0.734282
Acadsb	1051.58	-0.0688579	0.133143	-0.517173	0.605035	0.817839
Acadvl	1324.77	-0.361016	0.156951	-2.30019	0.0214375	0.106223
Acan	161.568	-1.49788	0.304551	-4.9183	8.72968e-07	2.33976e-05
Acap1	106.576	0.522928	0.620655	0.842543	0.399484	0.676965
Acap2	2209.1	0.0550674	0.115275	0.477704	0.632861	0.834944
Acap3	421.288	-0.502895	0.15975	-3.148	0.0016439	0.015078
Acat1	1149.71	-0.0877924	0.1537	-0.571193	0.567869	0.795823
Acat2	1419	0.0492193	0.120137	0.409693	0.682031	0.861229
Acat3	1.83755	-2.87215	2.2416	-1.28129	0.20009	NA
Acbd3	1820.11	-0.405033	0.161894	-2.50184	0.0123551	0.0715411
Acbd4	231.699	-0.422054	0.210579	-2.00425	0.0450432	0.180549
Acbd5	0	NA	NA	NA	NA	NA
Acbd6	1032.81	0.0658094	0.146066	0.450544	0.652318	0.845407
Acbd7	18.5831	-0.606093	0.616994	-0.982333	0.325936	0.610328
Accs	171.514	0.0944094	0.259823	0.363361	0.716336	0.879593
Accsl	245.273	0.106597	0.826622	0.128955	0.897393	0.960508
Acd	0	NA	NA	NA	NA	NA
Ace	34.5736	-1.48622	0.583094	-2.54886	0.0108077	0.0647306
Ace2	1.69309	-0.605963	2.2875	-0.264901	0.791085	NA
Ace3	0	NA	NA	NA	NA	NA
Acer1	4.8073	-0.0790307	2.29169	-0.0344858	0.97249	NA
Acer2	770.152	0.0595138	0.166777	0.356847	0.721206	0.882563
Acer3	432.015	-0.160511	0.172655	-0.929665	0.352545	0.63603
Ache	14.4081	-2.51858	0.734028	-3.43117	0.000600975	0.00665283
Acin1	8594.54	-0.123955	0.0948744	-1.30651	0.191378	0.456857
Ackr1	5.03003	-1.32416	1.38608	-0.955323	0.339415	NA
Ackr2	0.825626	-0.234598	3.11955	-0.0752027	0.940053	NA
Ackr3	932.166	0.693418	0.162684	4.26236	2.02284e-05	0.000374657
Ackr4	1.99678	4.75636	2.65568	1.79101	0.0732913	NA
Acly	12784.6	0.219452	0.0951942	2.30531	0.0211492	0.105104
Acmsd	0	NA	NA	NA	NA	NA
Acnat1	5.00068	2.11369	1.24917	1.69208	0.0906309	NA
Acnat2	0	NA	NA	NA	NA	NA
Aco1	2640.31	-0.00269458	0.140729	-0.0191473	0.984724	0.995098
Aco2	5721.55	0.0172205	0.109705	0.156971	0.875268	0.95198
Acod1	0.097862	-1.51612	4.99038	-0.303808	0.761274	NA
Acot1	489.437	0.627189	0.170854	3.67092	0.000241682	0.00312349
Acot10	215.989	-0.99286	0.288886	-3.43686	0.000588504	0.00655804
Acot11	0	NA	NA	NA	NA	NA
Acot12	1.17066	-1.17378	2.55058	-0.460202	0.645371	NA
Acot13	576.009	-0.159504	0.141123	-1.13025	0.258372	0.540914
Acot2	276.015	0.315211	0.218354	1.44358	0.148858	0.393091
Acot3	0.123783	0	4.99758	0	1	NA
Acot4	6.33416	-0.237845	1.0308	-0.230739	0.817517	NA
Acot5	0	NA	NA	NA	NA	NA
Acot6	18.7115	0.499021	0.642474	0.776718	0.437325	0.707518
Acot7	1413.55	-0.0502361	0.184564	-0.272188	0.785477	0.913318
Acot8	317.829	-0.086469	0.201317	-0.429517	0.667547	0.85326
Acot9	911.477	-1.06738	0.236841	-4.50676	6.58247e-06	0.000141228
Acox1	1888.09	-0.449341	0.16626	-2.70264	0.00687909	0.0464183
Acox2	2.19663	0.83435	1.84446	0.452355	0.651013	NA
Acox3	0	NA	NA	NA	NA	NA
Acoxl	6.69033	0.821404	2.01195	0.408262	0.683082	NA
Acp1	723.069	0.0213988	0.152757	0.140084	0.888594	0.956922
Acp2	0	NA	NA	NA	NA	NA
Acp5	388.408	-1.13929	0.226008	-5.04091	4.6333e-07	1.33511e-05
Acp6	2453.81	0.055124	0.113948	0.483766	0.628552	0.831956
Acp7	9.76618	-0.452066	1.23653	-0.365594	0.714668	NA
Acpp	129.367	-0.463273	0.267215	-1.73371	0.0829691	0.272598
Acpt	0	NA	NA	NA	NA	NA
Acr	1.43439	-0.866939	2.30785	-0.375649	0.707178	NA
Acrbp	177.507	-0.198192	0.268522	-0.738087	0.460462	0.724387
Acrv1	0	NA	NA	NA	NA	NA
Acsbg1	18.6908	-0.0341474	0.680806	-0.0501573	0.959997	0.986141
Acsbg2	11.0636	0	2.19108	0	1	1
Acsf2	710.455	0.0562705	0.153027	0.367717	0.713084	0.878042
Acsf3	328.946	-0.046395	0.174637	-0.265665	0.790497	0.91556
Acsl1	654.989	-0.0241623	0.149194	-0.161952	0.871344	0.951098
Acsl3	2006.02	0.49905	0.115532	4.31958	1.56323e-05	0.00030334
Acsl4	2352.37	0.0664473	0.11858	0.560357	0.575236	0.799459
Acsl5	579.628	-0.0295924	0.166411	-0.177827	0.858859	0.946152
Acsl6	100.039	-0.463858	0.295029	-1.57225	0.115893	0.339119
Acsm1	0	NA	NA	NA	NA	NA
Acsm2	0.303594	-1.66096	4.98092	-0.333464	0.738784	NA
Acsm3	26.2684	-2.3153	0.603736	-3.83496	0.000125583	0.00179207
Acsm4	0	NA	NA	NA	NA	NA
Acsm5	0	NA	NA	NA	NA	NA
Acss1	122.898	-0.603074	0.251909	-2.39401	0.0166652	0.0896197
Acss2	334.529	-0.215548	0.177236	-1.21617	0.223922	0.501341
Acss2os	0	NA	NA	NA	NA	NA
Acss3	34.4149	-0.569518	0.49291	-1.15542	0.247919	0.528556
Acta1	111.967	-1.24914	0.429964	-2.90521	0.00367008	0.0286356
Acta2	1636.79	-1.47959	0.440044	-3.36236	0.000772797	0.00819678
Actb	51116.1	-0.439458	0.198879	-2.20967	0.0271279	0.126396
Actbl2	0	NA	NA	NA	NA	NA
Actc1	11.0735	-1.48615	0.898229	-1.65454	0.0980188	0.304042
Actg1	818.258	-0.367952	0.164208	-2.24077	0.0250411	0.118691
Actg2	46.0141	0.428132	0.638433	0.670598	0.502477	0.753977
Actl10	1.08786	0	3.32745	0	1	NA
Actl11	0	NA	NA	NA	NA	NA
Actl6a	4104.32	0.122152	0.0996216	1.22615	0.22014	0.495858
Actl6b	8.3468	-1.51698	1.13117	-1.34107	0.179898	NA
Actl7a	0.145431	0	4.99758	0	1	NA
Actl7b	5.52642	-2.50134	2.10049	-1.19084	0.233717	NA
Actl9	0.097862	-1.51612	4.99038	-0.303808	0.761274	NA
Actn1	54.7008	-1.13634	0.419651	-2.70782	0.00677258	0.0458372
Actn2	39.219	-0.441691	0.52154	-0.846899	0.397051	0.675599
Actn3	1016.94	0.192663	0.243949	0.789769	0.429663	0.70257
Actn4	17882.9	-0.0307758	0.180232	-0.170757	0.864415	0.948811
Actr10	1813.43	-0.126722	0.12791	-0.990712	0.321826	0.605504
Actr1a	2915.1	-0.291801	0.129364	-2.25566	0.0240918	0.115373
Actr1b	2320.08	-0.210094	0.141602	-1.4837	0.137889	0.376507
Actr2	9942	-0.254334	0.153957	-1.65198	0.0985386	0.305372
Actr3	3482.18	-0.334352	0.148946	-2.24478	0.0247819	0.117712
Actr3b	431.9	-0.257566	0.189695	-1.35779	0.174531	0.432804
Actr5	429.775	-0.0317423	0.154294	-0.205726	0.837005	0.935828
Actr6	626.766	-0.202576	0.153455	-1.3201	0.186801	0.450229
Actr8	1190.65	-0.14065	0.147614	-0.952823	0.34068	0.624867
Actrt1	0	NA	NA	NA	NA	NA
Actrt2	0	NA	NA	NA	NA	NA
Actrt3	3.24947	0.12299	1.41058	0.0871915	0.930519	NA
Acvr1	1.18147	-1.06807	2.62364	-0.407095	0.683938	NA
Acvr1b	1103.12	0.36647	0.13574	2.6998	0.00693807	0.0467458
Acvr1c	0.856995	-0.0473973	3.10373	-0.0152711	0.987816	NA
Acvr2a	921.61	0.206184	0.139756	1.47532	0.140127	0.379813
Acvr2b	2480.02	0.316958	0.18215	1.74009	0.0818424	0.269887
Acvrl1	40.7331	0.417957	0.494446	0.845304	0.397941	0.675751
Acy1	810.764	0.05273	0.148402	0.355319	0.722351	0.883882
Acy3	98.9222	0.394681	0.288833	1.36647	0.171792	0.428777
Acyp1	239.026	0.101038	0.200539	0.503829	0.614381	0.824018
Acyp2	52.0128	-0.141997	0.381045	-0.372652	0.709407	0.876028
Ada	178.227	-0.767705	0.261173	-2.93945	0.003288	0.026359
Adad1	14.2543	-0.540963	0.926354	-0.58397	0.559241	0.790472
[truncated: 22,466 more rows]
